# Supplementary material for: Cortical arealization of interneurons defines shared and distinct molecular programs in developing human and macaque brains
Source: Research Square preprint supplement (doi:10.21203/rs.3.rs-3939272/v1), 2024-02-26
Supplement: Supplementary file 1 [file 13171bf35b8241701762830b.xlsx]

## Sheet: Supplementary Data 5
Table S5. Table summarizing the average expression of the different cortical lobe- and species-specific genes in inIPCs.
	FC_Human_inIPC ASCL1 DLX1	FC_Human_inIPC ASCL1 SFRP2 OLIG1	FC_Human_inIPC ASCL1 GADD45G	FC_Macaque_inIPC ASCL1 DLX1	FC_Macaque_inIPC ASCL1 SP8 PAX6	FC_Macaque_inIPC ASCL1 NKX2-1	MSC_Human_inIPC ASCL1 DLX1	MSC_Human_inIPC ASCL1 SFRP2 OLIG1	MSC_Human_inIPC ASCL1 GADD45G	MSC_Macaque_inIPC ASCL1 DLX1	MSC_Macaque_inIPC ASCL1 SP8 PAX6	MSC_Macaque_inIPC ASCL1 NKX2-1	TC_Human_inIPC ASCL1 DLX1	TC_Human_inIPC ASCL1 SFRP2 OLIG1	TC_Macaque_inIPC ASCL1 DLX1	TC_Macaque_inIPC ASCL1 SP8 PAX6	TC_Macaque_inIPC ASCL1 NKX2-1	OC_Human_inIPC ASCL1 DLX1	OC_Human_inIPC ASCL1 SFRP2 OLIG1	OC_Human_inIPC ASCL1 GADD45G	OC_Macaque_inIPC ASCL1 DLX1	OC_Macaque_inIPC ASCL1 SP8 PAX6	OC_Macaque_inIPC ASCL1 NKX2-1
IMP4	0.77053	0.292193	0	0.135835	0.0735839	0.147154	0.533011	0.601583	0.723402	0.280472	0.163009	0.393352	0.278491	0	0.186815	0.168659	0.126622	0.491408	0.258904	0.392711	0.0877424	0.196796	0
RABEPK	0.635739	0.201491	1.62443	0.0850006	0.0797861	0	0.24734	0.270933	0.0943171	0	0.0540797	0.186154	0.190715	0.180301	0	0.124078	0	0.34632	0.362114	0	0.111235	0	0
GOLT1B	0.939198	0.455608	0	0.285195	0.3264	0.122856	0.351332	0.317708	0.37065	0.299842	0.193922	0.152096	0.624146	0.0459642	0.207581	0.254775	0.19182	0.53667	0.285123	0	0.407903	0.242548	0
PREP	0.568344	0.316117	0	0.0247153	0.0531511	0.0850037	0.209122	0.1323	0.229048	0.0835911	0.267509	0.235406	0.246954	0.234922	0	0.136441	0.168341	0.351106	0.230471	0	0	0.863083	0
RNF213	0.497138	0.23591	0	0.0319819	0.196476	0.0850037	0.195075	0.149732	0.0993569	0.263411	0.331628	0.313111	0.198718	0.205429	0.240865	0.14182	0	0.235801	0.225113	0	0	0.668751	0
MGAT4C	1.35974	4.75701	0	0	0.208875	0	0.30296	0.859954	0.246866	0	0.0529792	0	0.571111	0.0171775	0	0.170851	0	0.585479	2.11598	0	0	0	0
KIF18B	0.521684	3.2094	0	0	0.167738	0.257679	0.0337869	0.00689722	0	0	0.0923732	0.0890388	0.388199	1.1359	0	0.0925316	0	0.0945388	1.72377	0	0	0	0
CEP112	0.628615	2.88703	1.62443	0.0430618	0.146223	0.61243	0.0904157	0.121864	0.104408	0	0.378031	0.166834	0.201904	1.048	0.817339	0.158334	0.496723	0.960181	2.90145	0.480307	0.220056	0	1.14943
LCORL	1.67059	4.72616	0	0.438186	1.31859	1.23164	0.536872	0.580803	0.77918	0.214835	1.05111	0.832263	2.24235	3.17276	0.854513	0.494402	0.724905	1.56071	3.81251	0	0.257894	0.612227	1.00644
PBDC1	0.379412	0.327511	5.78413	0.482269	0.39691	0.572156	0.53853	0.604248	0.456335	0.431268	0.426865	0.310212	0.363027	0.165372	1.12294	0.484203	0.347607	0.642227	0.404391	0	1.28629	0.914049	1.33227
SNX7	0.417759	0.340001	4.1597	0.042464	0.0298547	0	0.53036	0.445321	0.194852	0	0.0639529	0	0.314227	0.219147	0	0.0745803	0	0.339876	0.254541	0.550055	0.323822	0	0
TRMT5	0.198824	0.117777	4.29537	0.193682	0.190155	0.267031	0.187232	0.268675	0.0946078	0.146232	0.333724	0.0694016	0.216758	0.0612133	0	0.149482	0.263994	0.183672	0.190513	0	0	0.43132	0
RAB40B	0.209826	0.124342	4.29537	0.244132	0.103511	0.55514	0.2231	0.252878	0.10224	0.0502501	0.225032	0.17006	0.313084	0	0.497587	0.103941	0.392664	0.089941	0.0818132	0	0.0725953	0.165418	0
MED9	0	0.181877	3.24886	0.0117516	0.0445097	0	0.210526	0.174667	0.164122	0.142378	0.135556	0.162777	0.0444919	0.0648674	0.418813	0	0.303511	0.219582	0.177004	0.643004	0	0	0
SUSD4	0	0	2.67094	0.0133835	0.0300366	0	0.0100526	0	0.0207229	0	0	0	0.563686	0	0	0	0.0855176	0.0299707	0.021588	0	0	0	0
BEST1	0.0779033	0.0647933	2.67094	0	0.0256645	0	0.126062	0.112384	0.128729	0	0	0	0	0	0	0.00503339	0.264139	0.0862664	0.0854001	0.452653	0	0	0
SHC4	0	0.0586848	2.67094	0.00970064	0.0428421	0	0.00934241	0.00855731	0	0.0622743	0.0372281	0	0	0.0227435	0	0.0137759	0	0.102973	0.162059	0	0.120149	0	0
ZNF527	0.125499	0.0615263	2.67094	0.0158276	0.0131781	0.187899	0.110047	0.0439003	0.104766	0.111694	0.0390222	0.18788	0.61891	0.0829376	0.231385	0.0058887	0.244289	0.148048	0.0837777	0	0.14599	0	0
WDR81	0	0.0214423	2.67094	0.0270175	0.0551854	0	0.029841	0.0211696	0	0	0	0.0672463	0	0	0	0.0174323	0	0	0.0190332	0	0	0	0
PCBP4	0.915747	0.350409	1.62443	5.51944	0.679063	1.39006	0.874651	0.413747	0.705861	1.87373	0.708709	0.811518	0.715345	0.697324	1.4958	1.24789	0.905386	0.75734	0.578564	0	2.94476	0.518681	0
FGF19	0	0	0	1.58924	0	0	0	0	0	0	0	0	0	0	0	0	0	0	0.00705678	0	0	0	0
DLL1	0.464808	0.610332	4.60195	3.57701	0.920088	0.125511	1.37649	0.641206	1.39948	1.31705	0.361759	0.0675119	0.448377	1.22788	0.248145	1.14194	0.302558	1.39038	0.663584	0.397583	3.9887	0.480714	0
ATP6V0E1	1.23718	0.810741	1.62443	3.74411	1.12061	0.429935	1.46831	1.29795	1.27764	1.93114	0.83645	0.426185	1.32305	1.89144	1.55754	1.53935	0.305917	1.22246	1.05887	0.905305	5.48617	1.42532	0
LHX8	0	0	0	1.24527	0	0	0	0.00631014	0	0	0.017986	0	0	0	0	0	0	0	0	0	0	0	0
SNF8	0.867025	0.965829	0	4.22341	1.86341	1.53964	1.58685	1.32993	1.65739	3.88173	1.91103	2.09293	1.09021	0.629735	1.8928	2.39277	3.9181	1.18597	0.781708	1.16067	4.20513	3.46759	3.21797
SREK1IP1	0.788216	0.841486	0	2.11573	1.61172	1.49248	1.01434	0.780123	0.969361	2.80521	1.25102	1.36409	1.38287	1.17082	1.57364	1.43717	1.1607	1.56814	0.773951	1.00271	1.15353	1.58556	1.00644
WWC1	0.187608	0.121978	0	0.165502	0.0317535	0	0.00766382	0.0136022	0.0533553	0.330421	0.0722074	0.0403923	0.406408	0.116465	0	0.171449	0	0.142956	0.226259	0	0.107893	0.23382	0
GAS1	0.373018	0.13292	0	0.0928788	2.67823	0.154708	0.0719642	0.0464347	0.132632	0.0969838	1.46548	0.0692324	0.508607	0.867164	0.345817	0.304333	0	0.156314	0.30396	0.397583	0	0.840228	0
PDGFRA	0.0989248	0.0304302	2.67094	0.0252126	2.3737	0.239051	0.0591716	0.021164	0	0.111694	0.87265	0	0	0	0	0.0669158	0	0.279982	0.012991	0	0	1.0474	0
FAM171B	0.618473	0.46548	1.48876	0.412727	3.25435	1.20294	0.392131	0.797714	0.501483	0.75052	2.25751	1.24675	0.607184	0.482638	0.686476	0.434205	0.635942	0.642144	0.63793	0.397583	0.538572	1.21754	0.576901
SPHKAP	0	0	0	0.0157391	1.76537	0.0970233	0.00907574	0.00249776	0.0406805	0.120351	0.609074	0.0176883	0.38074	0	0.248145	0.152467	0	0.0163808	0.00996294	0	0	0.508285	0
NFIC	0.366801	0.237825	1.48876	0.0971399	1.9936	0.09758	0.598	0.434728	0.129427	0.660216	1.31523	0.170002	1.78646	1.49973	0.694022	0.62256	0.112051	0.515626	0.348163	1.18832	0	1.61646	0
SCGN	0.964476	0.583167	0	0.0172555	1.62069	0.156536	0.727033	0.203506	0.252784	0.612034	1.97399	0.0940566	1.40286	0.205078	0.230044	0.386852	0	1.26299	0.773583	0	0	0	0
SYT6	0.157135	0.0679159	0	0.105454	0.236178	2.48015	0.0485658	0.0277699	0.131191	0.163251	0.0477602	1.02983	0.458487	0	0	0.103611	0.816468	0.271313	0.278326	0	0.241352	0.165418	0
ARL6IP5	0.203799	0.430584	0	0.773799	0.77825	3.81339	0.643229	0.617767	0.593953	0.656495	0.425895	1.99872	0.847323	0.679169	0	0.166389	2.05223	0.497114	0.681684	0	1.64793	1.33292	5.4137
CCDC174	0.517286	0.356466	0	0.54542	0.879534	3.47065	0.614065	0.547554	0.812231	0.545642	0.868262	2.68028	1.10302	0.182379	0.724376	0.30421	2.48715	0.45273	0.284955	0.392711	0.134279	2.50346	1.90917
HCN1	0.199113	0.121023	0	0	0.262367	2.02707	0.00280826	0.00336904	0	0.201281	0.131015	1.18022	0.281131	0.0460851	0.46277	0.0785364	0.789643	0.0384087	0.0416033	0.589345	0	0.269556	0
TAC3	0.0369429	0.00849744	0	0.0373738	0.666431	0.214114	2.47017	0.294661	1.06246	0	0.802186	0	0	0	0.927644	0.0529385	0	0.37372	0.0640751	0	0.0854803	1.38011	0
RASD1	0.346312	0.125518	0	0.546912	0.306888	0.228938	1.40932	0.457051	0.426239	0.195303	0.159274	0.0963908	0.204837	0.343333	0.636193	0.0660386	0.337107	1.2527	0.693338	0	1.15358	0.473057	0
ARPC5	1.76512	2.06506	2.67094	1.77033	1.58187	3.13069	2.64646	1.49901	2.80107	1.61228	1.34376	1.63886	1.11286	1.24741	2.0138	1.41364	1.53587	2.29291	1.8999	1.46912	2.77161	1.47833	1.49165
RFC4	0.907767	0.83217	0	0.395243	0.786495	0.090876	1.38703	1.23877	0.598723	0.792017	0.716118	0.317431	0.837553	0.515393	0	0.953838	0.478051	1.04406	0.937197	0	0.539757	0.63469	0.914746
HAUS1	1.48567	1.50177	0	1.25996	0.755891	0.596006	1.98082	1.60743	1.33436	1.22997	0.737477	0.294975	0.933668	2.32218	0.255056	0.921752	0.505704	1.11918	0.852889	0.905305	1.78696	1.30095	0
FEN1	0.328445	0.0254519	0	0.172155	0.527114	0.105914	1.05503	1.08122	0.22785	0.634836	0.476756	0.135414	0.397053	0	0	0.626273	0	0.207638	0.235275	0	0.118497	0.403248	0
GSX1	0	0	0	0.658056	0	0	1.07259	0.180449	0.357529	0	0.0308733	0	0	0	0	0.0371847	0	0.0109243	0.0133189	0	0.220267	0	0
IGSF10	0.196009	0.0462656	0	0	0.00563962	0	0.547247	0.16505	0.301601	0	0	0	0	0.0486472	0	0	0	0.0932913	0.0952178	0	0	0	0
BCAN	0.403269	0.164774	0	0.0276904	0.399551	0	0.537763	3.3607	0.679822	0.0622743	0.212607	0	0.0444919	0.228298	0.407	1.32221	0	0.37516	0.411213	0	0	0	0
ATP1B3	2.06592	1.86623	0	1.11843	1.12862	1.86122	1.7037	4.97294	1.95372	1.10303	1.11153	1.28667	1.23982	2.50928	1.68795	2.7499	1.13308	1.89055	1.38238	0.392711	1.92798	1.57543	0
JUNB	0.810388	0.165684	1.48876	0.399229	0.805278	1.306	0.793705	2.60877	0.70104	0.354686	0.608367	0.344519	0.491992	0.454412	0.828764	0.108366	1.32687	0.426056	0.455081	0.850235	0.224124	0.439062	1.14943
SLC25A5	2.47688	2.0516	1.62443	2.18703	1.67629	0.655103	3.64942	6.97903	2.90222	1.92832	1.54059	1.35747	1.83437	2.79777	1.4231	2.57799	0.577556	3.25502	2.39088	2.80178	2.73943	1.3311	1.49165
RARRES2	0.306193	0.279731	0	0.0126655	0.0918905	0	0.79357	2.11151	0.677781	0	0.0994597	0	0.0478166	0.990987	0	0.122814	0	0.771024	0.352075	1.55825	0	0	0
ZFP36L2	0.540805	0.434389	0	0.101557	0.504527	0.13257	0.555596	1.88358	0.484158	0.148844	0.340699	0.0896383	0.425753	0.730731	0	0.514291	0.0950254	1.03337	0.904283	0	0.275644	0	0
NPM1	6.7002	4.75395	13.6702	3.96469	2.65532	2.39845	12.3516	17.5248	11.8544	2.26946	2.08303	2.75835	5.53604	6.98948	1.38333	1.64929	2.04665	8.28225	5.65195	14.7342	5.35706	1.11461	4.31118
RSL1D1	1.9815	0.920215	2.97752	1.51525	1.61888	2.42374	2.5802	4.91977	3.33564	1.08153	1.52035	2.56386	1.51509	1.09147	2.52376	0.947591	2.48787	1.68884	0.902372	3.00853	1.89035	1.51358	4.09434
PABPC1	5.09843	2.98855	7.27289	2.36062	3.03361	1.93359	6.13072	10.0665	9.22141	3.64154	3.23862	3.18761	1.95445	3.65286	4.73121	4.00118	1.66832	4.26415	3.04669	4.41523	2.05853	3.4365	0.576901
GPM6B	3.40568	4.78056	4.1597	1.5967	2.18768	2.84992	3.3905	6.28607	4.16587	2.59807	2.04501	2.01156	3.7647	3.29437	2.35744	2.5667	2.08439	3.92362	4.4659	2.82731	0.898559	1.13497	0
HNRNPM	5.72578	3.92998	8.62598	6.55323	5.84133	4.46931	7.93915	6.05255	9.96039	7.71932	4.59858	4.61543	3.67422	7.39763	4.3691	5.30382	5.20357	5.05985	4.54853	3.89253	4.56064	6.26793	5.443
MAP1A	0.924631	0.648321	0	1.57428	0.844707	0.234338	0.71733	0.434959	1.28615	0.990845	0.563439	0.866355	0.722588	0.36935	3.25657	1.02405	0.715398	0.351288	0.745507	0	0.733511	1.03537	0
PET100	1.74188	2.20723	0	3.2978	3.02765	1.57661	1.69193	1.33638	1.27289	5.26412	1.54849	2.54426	1.04233	1.35117	2.75718	2.12491	1.67169	2.1845	0.983693	3.46087	2.70298	4.48247	4.40288
DYNC1I2	4.98	3.10805	0	6.04184	6.2779	6.91875	5.86127	3.2848	4.86991	10.7635	4.94682	7.58426	2.66415	2.15862	4.19786	4.80025	6.28492	5.03304	3.1804	2.87578	2.76764	5.16906	12.9687
IGF2BP1	0.676571	1.01211	0	1.61751	0.0313083	0.439034	0.188585	0.169006	0.250603	1.58423	0.192573	0.555551	0.537458	0.568848	0.240865	0.40257	0.852126	0.574716	0.864914	0	1.40144	0	1.00644
BEX1	5.92899	4.29175	4.60195	10.3861	8.7962	10.081	4.89714	3.51454	4.90151	11.3871	7.09	7.89092	3.37376	4.95948	4.93494	7.14215	6.32055	4.62881	4.19559	6.16402	9.36868	6.29541	14.6091
STK26	0.0292802	0.0450968	0	0.211381	0.0568466	0.120068	0.0248112	0.0614011	0.0270485	0.948818	0.0328661	0	0.0870474	0.100425	0	0.15839	0	0.174211	0.0735931	0	0	0	0
MTA2	0.315955	0.379713	0	0.61258	0.569706	0.910001	0.106649	0.133219	0.148051	1.21649	0.52631	0.789891	0.23378	0.0986723	1.49407	0.848365	0.808261	0.0483564	0.181603	0.480307	0.854391	0	0
HDAC2	5.09954	6.83974	14.4101	5.78356	7.8216	9.24874	6.47786	4.15568	6.81986	10.7597	7.51465	8.44322	2.48024	3.90868	12.4837	9.67049	8.96908	5.19947	4.62382	7.83907	5.15866	6.20302	9.52439
IGDCC4	0.199715	0.0687444	0	0.45107	0.568294	0.291534	0.0577344	0.0729613	0.0629922	0.933564	0.516277	0.211931	0.061316	0.198403	0.483301	0.33705	0.490582	0.263716	0.190554	0	0	0	0
PSMB10	0.0575083	0.0219327	0	0.208906	0.250321	0	0.114111	0.175877	0.0268161	0.354234	0.24515	0.168149	0.083668	0	0	0.316439	0	0.21272	0.0132961	0.550055	0.289771	0.23382	0.576901
SYNJ2	0.0551633	0	0	0.0283232	0.0274068	0.219039	0.00210498	0.00255352	0	0.0835911	0.0159346	0.0248387	0.154226	0	0	0.00537607	0	0	0.0186101	0	0	0	0
CHST6	0	0.0165397	0	0	0.025322	0	0	0.00213434	0	0	0.0622465	0	0	0	0	0.0292575	0	0.00949181	0.0112023	0	0	0	0
CBY3	0	0.0168276	0	0.594505	0.219337	0	0	0.00672174	0	0.226542	0.180733	0	0	0.0563895	0	0.410686	0	0.0171999	0	0	1.07452	0.697496	0
LRRC8C	0	0	0	0.0154538	0.0514962	0	0.00761771	0.0282064	0	0	0.0609718	0.195514	0	0	0	0.0203303	0.122489	0	0.012991	0	0	0	0
SLITRK5	0.149644	0.0319308	0	0.0789256	0.0981445	0.421228	0.0179932	0.0226345	0.0296541	0	0.13155	0.114831	0	0	0	0.0797738	0.578027	0.0341392	0.10787	0	0	0	0
SYNGR4	0	0.0158575	0	0.0366786	0.0901329	0	0	0	0	0	0.0198725	0	0	0	0	0.00613364	0	0	0	0	0	0	0
NLRC4	0	0.00650991	0	0.0249039	0	0	0.00394397	0	0	0	0.0142541	0	0	0	0	0	0	0	0.0141136	0	0	0	0
CLTCL1	0.202132	0.121778	0	0.0418206	0.027183	0	0.0035219	0.0118273	0	0	0.0348687	0	0.182912	0.172506	0	0.012532	0	0.0575775	0.152077	0.52378	0	0	0
GMFG	0	0.0536435	0	0.172691	0.172776	0.325296	0.00554646	0	0	0.244575	0.170148	0.427476	0	0.0518073	0	0.189274	0.43831	0.0706666	0.0274484	0	0.118497	0	0
AP1S2	1.71082	0.845194	0	1.65816	3.80031	3.35511	0.867749	0.674111	0.986619	3.32462	9.08653	3.71385	1.98898	2.35578	5.42935	2.09373	3.51884	1.0385	1.43174	2.33463	0.79851	6.6406	5.9906
IRF2BP2	0.634742	0.6038	0	0.816681	2.42279	3.78794	0.372539	0.239078	0.242038	1.69658	3.09724	1.58526	0.83652	0.191151	4.24918	1.06666	3.23602	0.651362	0.55641	0	1.09001	1.99404	1.7307
S100A10	0	0.063401	0	0.181117	0.909322	0.426396	0.175084	0.0445763	0.259523	1.28104	2.14815	0.409318	0.0904486	0	1.36402	2.29734	0.774629	0.311733	0.247909	0	0.206113	1.37311	0
GSTM3	0.728427	0.476031	0	1.43536	2.63021	1.88677	0.846552	0.754545	0.809297	2.85146	4.04794	2.56027	0.991303	0.510682	2.32134	3.78013	2.3824	0.801755	0.92381	0.947638	1.4718	2.15904	6.363
SYNPR	0.27994	0.304827	0	0.00608122	1.3546	0.715351	0.121636	0.01209	0.21375	0.623886	1.79636	0.420768	0.459066	0	0.318097	0.184796	0.133896	0.254335	0.189225	1.06965	0	0.466352	0
TOX2	0.120797	0.0438874	0	0.137177	0.264771	0.883325	0.0373623	0.00916608	0.100113	0.237027	0.172037	1.96955	0.489105	0.0504376	0	0.0310517	0.822015	0.0496905	0.0759975	0	0.178726	0	0.576901
RAB2A	2.11088	3.45888	4.87329	3.39932	3.11375	9.04015	2.55513	1.81737	3.14568	3.59739	4.29122	8.55034	2.86573	2.85556	5.21108	2.94528	5.88784	2.14407	2.29933	3.17281	3.74522	4.39133	4.77495
DYNC1H1	1.64622	1.03319	0	2.472	3.23269	5.61479	1.48569	1.08096	2.13347	2.93186	2.90901	5.79979	2.95556	1.01501	5.03885	1.24047	4.30616	1.52904	1.61935	1.54996	2.05872	2.19076	4.59594
VGLL4	1.59194	1.05491	0	1.08507	1.3237	3.5251	1.02216	0.676479	1.26939	1.90935	1.66029	4.09313	2.03675	2.03554	2.51951	1.02668	2.872	2.10084	1.55704	1.02134	0.31681	2.04562	1.00644
SMARCA4	2.5884	2.61966	0	4.06408	2.65108	3.48739	1.75137	1.18832	1.56014	3.08538	2.32569	5.71825	2.99884	2.03399	4.44996	1.80536	4.89964	2.11507	2.40171	3.38631	3.20528	1.8367	3.29239
KCNIP4	1.06485	0.806714	0	0.00541826	0.0117528	0	0.0805073	0.0073088	0	0	0.0550315	0	8.77362	0.558237	0	0.0155889	0	0.115664	0.13517	0	0.107691	0	0
GALNTL6	0.363594	0.0716234	0	0.00703395	0.0210412	0.224618	0	0	0	0.0229195	0.0177172	0.250521	4.85704	0	0.46277	0.0121038	0.10395	0.0130046	0.0192031	0	0	0	0
LUZP2	0.486619	0.149411	0	0.0196109	0.111025	0.0786052	0.0421378	0.0100688	0.0254207	0	0.264996	0.0540608	3.31923	0	0	0.0153702	0	0.0593299	0.0998923	0	0	0.218766	0
GABRG3	0.0583649	0.306489	0	0.0109628	0.0623423	0.548698	0.0119214	0.00254778	0	0.350936	0.0600552	0.0176883	3.04167	0.101425	0	0.0683399	0.313558	0.0812443	0.294235	0	0.0715113	0	0
SHISA9	0.241647	0.0183852	0	0	0.0195772	0	0.0257815	0	0	0	0.0276625	0	2.61933	0	0	0	0	0	0.147275	0	0	0	0
SORCS3	0.68377	0.135963	0	0.0148661	0.173674	0	0.0368423	0.0303256	0	0.0876693	0.149151	0.0980172	2.26598	0.262239	0	0	0.176754	0.149302	0.132819	0	0	0	0
SLC26A3	0.128742	0.0449626	0	0	0	0	0.00653072	0	0	0	0	0	2.16861	0	0	0	0	0	0.0132048	0	0	0	0
PTPRT	0.594201	0.117113	0	0.00525786	0.12809	0.532288	0.0260278	0.00533997	0.0335002	0.159159	0.0475451	0.511792	1.98161	0.266237	0	0.0139079	0.274393	0.127376	0.193638	0	0	0	0
FGF12	0.564168	0.391895	0	0.0283384	0.292569	0	0.113424	0.0411161	0.121453	0.217726	0.223465	0.117608	1.95357	0.159956	0	0.107185	0	0.506111	0.144258	1.28601	0	0.911707	0.576901
ATG10	0.463655	1.0018	0	0.0757165	0.0945053	0	0.349848	0.196429	0.227209	0.0273306	0.117727	0	0.395528	3.44872	0	0.0211489	0	0.71264	1.11315	0	0.511058	0	0
PDE1A	0.575185	0.426119	0	0.00852916	0.0696827	0.427866	0.0498142	0.00932168	0.146043	0	0	0	0.296897	3.32345	0	0.116888	0	0.144272	0.258646	0	0	0.902668	0
PKP4	0.241167	1.54433	5.34188	0.0466826	0.516317	0.446219	0.0388652	0.0573204	0	0	0.505013	0.381261	0.513922	3.99826	0.186815	0.27934	0.362	0.713012	1.76016	0	0	0.23382	0
NEUROG2	0.0813398	0.0785209	0	0.0481336	0.113267	0	0.0325376	0.0119147	0	0	0.0689873	0	1.17554	2.80396	0	0.0121057	0	0	0.203159	0	0	0	0
PLA2G6	0.042914	0.0507117	0	0.0402578	0.0561331	0	0.0535541	0.0498798	0.0377045	0.0750694	0.0780833	0.0217925	0.0625359	2.68467	0.256292	0.0385228	0.130378	0.145752	0.191969	0	0	0	0
HMGA2	0.817053	1.30551	0	0.994385	0	0	0	0.0119184	0	0.502171	0.0278726	0	0.18002	2.47771	0	0.0134552	0	0.83091	1.74368	0	1.34256	0	0
BCL2	0.502167	0.731876	0	0.0560684	0.0806603	0.332541	0.050779	0.0519477	0.0390387	0.40586	0.0812944	0.171457	0.529733	2.73339	0	0.0935913	0.490984	0.356595	0.8379	0	0	0	0.576901
HERPUD1	0.639606	0.207317	0	0.37994	0.727399	1.61924	0.94043	1.15399	0.719868	1.07981	1.41404	1.34188	0.694509	0.859161	2.48287	0.191192	0.908328	1.0558	0.534168	0	0.328129	1.44754	0
YPEL5	0.573973	0.443446	1.48876	0.859187	1.29104	1.4673	1.13616	0.887338	1.39542	1.55992	1.03363	1.71143	1.03197	0.605293	3.51858	0.490291	2.65734	0.968249	0.750274	1.7121	1.19592	0.738789	2.49809
MAPK8IP2	0.227062	0.180386	1.62443	0.243051	0.244065	0.837801	0.0966066	0.0485101	0.183626	0.341497	0.419766	0.680341	0.361466	0.158693	2.18606	0.223956	0.27043	0.268852	0.282467	1.25807	0	0.169506	1.92119
DVL3	0.481838	0.171417	0	1.11834	0.762231	0.936802	0.258373	0.256893	0.19509	0.710791	0.70153	0.650803	0.191617	0.741178	2.64925	0.432853	0.659423	0.515514	0.550906	0	1.08787	0.821654	0
NRBP2	0	0.0675469	0	0.0732525	0.287755	0.0490918	0.0690832	0.108686	0.0174417	0.0835724	0.417321	0.340358	0.110396	0	1.57027	0.102348	0.198976	0.354636	0.169261	0	0	0.660023	0.806322
RCE1	0.185688	0.0376462	0	0.315194	0.237158	0.228938	0.161826	0.22031	0.309489	0.40313	0.443783	0.484689	0.166874	0.495114	1.67194	0.225627	0.884355	0.141918	0.0418613	1.07383	0.400201	0.542633	0
ZNF674	0	0.0298479	0	0.0621497	0.0843607	0	0.0095542	0.0226335	0	0.0882924	0.186235	0.0664103	0.018044	0.0691849	1.18125	0.0545414	0.103391	0.0385269	0.0512612	0	0	0.218766	0
AKAP17A	0.188906	0.00868372	0	0.354558	0.45877	0.255944	0.236292	0.360236	0.366794	0.438238	0.721824	0.640557	0.083668	0.410155	1.4917	0.131416	1.08612	0.326826	0.170929	0.679717	0.23089	0	0.806322
CLCN6	0.165574	0.169952	0	0.0854392	0.122103	0.552807	0.135959	0.0876686	0.143383	0.36571	0.256559	0.221786	0.413015	0.143824	1.32315	0.0975514	0.555394	0.0131136	0.169933	0	0	0.188772	0.806322
CHRNA7	0.0433396	0.064294	0	0.00580918	0.111778	0.362109	0.00751258	0.0391382	0	0.13289	0.176559	0.311468	0.100221	0	1.04801	0.0150971	0.154931	0.0756131	0.103189	0	0	0.39343	0
PRSS55	0	0	0	0.0177223	0.0672032	0.0490918	0	0	0	0.0229195	0.101164	0.0300528	0	0	0	0.0382378	0	0	0.0171369	0	0	0.23382	0
ARRB1	0	0.0989509	0	0.0409049	0.0325379	0	0.0153635	0	0	0	0.105742	0.0952442	0.298617	0.446947	0	0.0201602	0.0882651	0.094266	0.0876405	0	0	0.482509	0
FAM214B	0.0257679	0.0392857	0	0.442996	0.141153	0.77677	0.1374	0.0737045	0.221822	0.62852	0.213075	0.168309	0	0	0	0.0544242	0.292721	0.155967	0.10116	0	0.191998	0.831449	0
PLAC9	0	0	0	0.0118612	0.0104259	0	0	0.00475184	0	0	0	0	0	0	0	0.0595822	0	0.012306	0.0103333	0	0.106166	0	0
KISS1R	0	0	0	0.00754359	0	0	0	0	0	0	0	0	0	0	0	0	0	0	0	0	0	0	0
ETS2	0	0.0219327	0	0.118696	0.00491202	0	0.0281921	0.0748855	0	0	0.0205516	0	0.0444919	0	0	0	0.154931	0.0163808	0	0	0.342901	0.185	0
F12	0	0.00928182	0	0	0	0	0.0138736	0.00416878	0	0	0.0212244	0	0	0	0	0	0	0	0	0	0	0	0
RASGRP2	0.12672	0.0304302	0	0.0217432	0.0304219	0	0.0395268	0	0	0	0	0	0.0931446	0	0	0.0110552	0	0	0.0135514	0	0	0	0
ANKRD31	0	0	0	0.0107188	0.0548936	0.09758	0.0112318	0.00727684	0	0.06222	0.0338575	0.013884	0.176803	0	0.318097	0	0	0	0	0	0	0	0
KCNE4	0.0779934	0	0	0.00626091	0.00783092	0	0	0.00616425	0	0	0	0	0	0	0	0.0293717	0	0	0.0191619	0	0	0	0
GPX4	4.54765	5.12335	3.11319	6.45661	5.14094	2.09765	4.62221	3.7128	4.89715	8.53148	4.22334	2.34289	2.55546	6.13611	4.56516	9.39746	1.40014	5.81797	4.83689	5.09085	7.66704	4.53332	5.53503
PCBP1	2.54427	2.0181	0	3.85928	3.21443	0.224618	2.76771	2.4778	2.27098	4.34883	2.17969	0.0579458	2.31379	2.29463	0	4.20249	0.0966978	2.4181	2.12302	2.13109	4.53092	2.56816	0.914746
SRSF1	0.716555	0.0876821	0	2.50335	2.9228	0.599228	1.87354	1.92906	1.78724	3.39283	2.06975	1.11459	0	0.1923	1.91927	4.02901	1.69572	0.663004	0.0645233	0	3.72953	1.97311	0
PTPMT1	0.155641	0.122178	1.48876	1.19892	1.48061	0	0.456858	0.750001	0.475322	0.756198	0.90218	0.267864	0.0452243	0.298814	0.226326	1.82035	0.274322	0.181471	0.116982	1.22977	2.26901	1.21756	0
DHPS	1.64036	1.56951	1.62443	2.78488	1.94026	1.20291	1.98474	1.54597	2.01855	1.5257	1.73961	1.10915	1.5588	0.873316	0.59589	3.62211	0.598723	1.97666	1.70252	1.33177	1.82366	2.13264	1.00644
LSM6	1.56397	1.82769	0	2.01462	1.67786	1.90425	1.2659	1.45062	0.96817	2.33085	1.7016	1.65364	0.871217	0.850376	0.652641	3.26745	1.06329	0.942467	0.796057	1.27547	2.43301	1.28287	3.48813
COX16	1.37749	1.67693	1.62443	2.22536	1.57345	0.0916809	0.366193	0.332891	0.412956	1.58517	0.788657	0.256243	0.239136	1.0709	0	2.28797	0.383532	1.14439	0.941468	0	2.999	1.5733	0
RAB13	0.653488	0.0497587	1.62443	0.558315	0.545291	0	1.49545	1.0467	1.81127	0.291859	0.406615	0	0.107898	0.484778	0	1.38522	0	0.0458001	0.436972	3.64848	1.18359	0	0
MANF	0.668791	0.531833	1.62443	1.87204	2.36825	1.3328	1.02949	1.16207	0.679399	1.68718	1.26077	1.41398	0.147624	0.50889	0.73492	2.48062	1.02865	0.684621	1.1167	2.76507	1.992	1.65028	0
RCC1	0.57884	0.508068	0	0.661965	1.03314	0.147154	0.402147	0.361235	0.235703	0.66335	0.561288	0.227336	0.147707	0.524301	0.553398	1.61934	0	0.3286	0.507038	0.539374	0.564996	0.668123	0
RAP2B	0.156991	0.345714	0	0.081403	0.374673	1.84186	0.193793	0.133985	0.0974369	0.768287	0.931347	2.03342	0.0974984	0.190634	1.14976	0.0360749	2.23049	0.219966	0.222766	0.52378	0.0715113	0.53919	0.576901
GABRA2	0.129319	0.201431	0	0.0459556	0.33719	1.9484	0.136908	0.243452	0.189504	0.124494	0.176258	1.44617	0.243883	0.178674	0.186815	0.090766	2.16078	0.190018	0.182279	0	0	0.403121	1.1538
PHF14	3.7613	2.69675	4.29537	4.27874	3.15194	6.67779	3.11698	2.10053	2.53753	2.5522	3.39869	5.71032	2.47878	3.21983	3.83663	1.71406	7.08804	2.75392	3.13487	1.6401	1.92613	3.4626	4.04776
SARAF	3.62446	1.84382	5.78413	3.90477	2.9146	6.68573	2.71901	2.8876	3.61898	3.65426	4.22073	6.50646	4.42009	2.86791	7.36722	1.95192	8.05695	2.89469	3.46718	6.33024	5.44738	4.36066	7.79373
SMOC1	1.11821	1.21501	0	1.02476	1.49158	0	0.438183	0.322498	0.127515	0.816996	0.90276	0.0317615	1.48539	0.460069	1.18772	0.208015	0	2.55873	1.05789	0.397583	0.445469	0.465184	0
FAM133B	1.90222	1.24874	4.46628	0.845336	1.13539	0.845093	1.5492	1.49044	1.16314	1.54234	1.43252	2.43202	1.59172	1.78303	1.35781	0.689512	1.38801	1.96198	0.92088	1.66434	0.537687	0.692148	4.79694
C8orf33	0.902069	0.575893	1.48876	0.803908	0.62203	1.66499	0.99783	1.12502	1.1839	0.94086	1.03319	1.29911	0.325437	0.90873	0.669537	0.714384	1.31076	1.55077	0.610978	0	0.891627	0.479073	4.63756
DLEU7	0.173466	0.179617	0	0.156641	0.391849	0	0.0586206	0.0807522	0	0.167438	0.339439	0.0822793	0.638219	0.293978	0	0.291889	0.296194	0.774111	0.304664	0	0	0.169506	0
CTNNA1	1.57161	0.96277	0	0.800864	1.22928	0.284128	0.889624	0.610826	0.979222	1.18624	1.11091	1.33392	2.22818	1.41167	0.62492	0.599956	0.807	2.17735	1.42607	1.75247	1.58728	0.600392	0.914746
ZNF3	0.797564	0.363899	1.62443	0.0263291	0.188634	0.0786052	0.75566	0.625623	0.920246	0.188066	0.395734	0.494236	0.972949	0.237615	0.525677	0	0.494089	0.746693	0.42119	0.623752	0	0.169506	0
BEST3	0.23633	0.335612	0	0	0.0101818	0	0.24886	0.0400525	0.412553	0	0	0	0.179469	0	0	0.0247372	0	0.600669	0.271807	0.539374	0	0	0
OST4	3.47257	3.36762	11.4326	2.75828	2.81716	2.57176	3.65353	3.27177	3.48149	3.04758	3.49231	3.83046	1.72638	3.68571	4.62211	2.55397	3.56357	3.94896	2.48606	2.54642	1.95933	2.2309	2.15587
CDC20B	0	0	0	0	0	0	0	0	0	0	0	0.0540608	0.0870474	0	0	0	0	0	3.08717	0	0	0	0
TSHZ2	0.487028	0.652076	0	0.11076	0.121906	0.120068	0.0373952	0.0104182	0.168127	0.249039	0.256136	0.0609206	0.570686	0.0227435	0.716379	0.0681098	0.222179	0.549175	4.28548	0	0.106494	0	0
WDPCP	1.31377	2.44455	0	0.0295354	0.143918	0.334778	0.0631884	0.0975453	0.0110243	0.0658631	0.158502	0.353524	0.732564	1.68154	0	0.111383	0	0.712747	3.55346	0	0	0	0
DEPDC1B	0.342697	2.4019	0	0.046639	0.35758	0	0.24392	0.218759	0.231726	0	0.313008	0.0217925	0.227149	2.00305	0	0.266498	0.132284	0.472201	2.48982	0	0	0	0
CAPS	0.042914	0	0	0.071463	0.0639849	0	0.0137924	0.0138743	0	0	0.0623598	0	0.261142	0	0	0.059135	0	0	2.09435	0	0	0	0
IFI16	0.278446	0.0743018	0	0.00659961	0.0072749	0	0.193535	0.142642	0.148989	0	0.0885722	0	0.100134	0	0	0.0113923	0	0.0985199	0.136823	2.26658	0	0	0
CTSD	0.160498	0	0	0.00908067	0.131068	0.325961	0.279126	0.424851	0.405886	0.170742	0.351111	0.372733	0.340583	0	0.607703	0.00467666	0.132284	0.173643	0.00640026	2.10537	0	0	0
UBE2Q2L	0.0369429	0.0291067	0	0.0598537	0.233395	0.214114	0.0191421	0.0255803	0	0	0.0817139	0.21497	0.0452243	0	0.426951	0.036685	0.370928	0	0	1.75557	0	0.218766	0
GAL3ST3	0.0492576	0.0134947	0	0.0765104	0.0548554	0.45151	0.0369118	0.0516118	0.0245112	0.0471631	0.183825	0.013884	0.094304	0.205078	0	0.0747085	0.145919	0.0130981	0.0133388	1.72935	0	0	0
NEFL	0.1115	0.00868372	0	0.267074	0.0718241	0	0.0800685	0.0261714	0.048356	0	0	0.0829002	0.362381	0	0	0.0696375	0	0.107354	0.0657168	1.62993	0	0	0
RASL10A	0	0	0	0.00604469	0.00906414	0	0.00377321	0	0	0	0.0351046	0	0.20816	0	0	0	0	0.112806	0	0.942766	0	0	0
LMAN1	0.141356	0.18832	0	1.24318	0.821878	1.05674	0.530605	0.793792	0.452712	0.222529	0.701561	0.891858	0.132104	0.100245	0.577202	0.379876	0.564077	0.482563	0.288728	0	4.43039	0.959952	2.13859
IGFBP3	0	0	0	0.0264143	0.00375758	0	0.00325463	0	0	0	0	0.114657	0	0	0	0	0	0.0131136	0.0200158	0	1.77337	0.196796	0
RAX	0	0	0	0	0	0	0	0	0	0	0	0	0	0	0	0	0	0	0	0	1.39585	0	0
GPC3	0	0.0286946	0	0.0985121	0.040836	0	0	0.0069857	0.0425063	0.113469	0	0	0	0.0171775	0	0.0251131	0	0	0.00780916	0	0.82196	0	0
SIX6	0	0	0	0.0314505	0	0	0	0	0	0	0	0	0	0	0	0	0	0.156539	0	0	0.819924	0	0
DMRTA1	0	0	0	0.52707	0.0129771	0	0.0090498	0.0180199	0	0.177963	0.0612409	0.0176883	0.0458642	0.0460851	0	0.0457581	0	0	0	0	1.06626	0.211158	0
SSTR2	0	0.0667517	0	0.30608	0.28863	0	0.0834842	0.0407663	0.136842	0	0.261775	0.0923073	0	0.0254912	0.43496	0.14292	0.284604	0.0412286	0.012991	0	0.248556	0.269556	0
DNLZ	0	0	1.62443	0.634557	0.324065	0.125511	0.0287264	0	0	0.184033	0.133464	0.0348431	0	0	0	0.352145	0.244029	0	0	0	0.511221	0	0
NCL	5.08116	4.26874	10.9903	7.9551	8.34284	5.66731	7.26625	7.55347	5.77557	6.35748	5.30052	6.11094	6.42805	5.30748	4.63291	4.52183	3.88702	4.21434	3.57985	3.21708	11.5526	5.75798	3.49251
WNT7B	0	0.014945	0	0.022902	0	0	0.00985814	0.00424399	0	0.0835911	0.0449498	0.163755	0.0444919	0	0	0.0436159	0.0548471	0	0.036414	0	0.40071	0	0
HNRNPDL	9.42175	10.1641	12.1814	12.3082	11.9238	13.6691	16.3775	15.2428	16.5296	14.7551	14.5408	17.7919	7.0803	6.76285	14.8462	12.0001	12.7942	10.034	7.61594	10.114	16.0054	12.1952	9.46818
IFI35	0.133383	0	0	0	0.0563011	0	0	0.0218573	0	0	0.0437137	0.163106	0.0444919	0	0	0.0256395	0	0	0.0288854	0	0.0820237	0.880053	0
KPNA6	0.137605	0.171513	0	0.0668258	0.335277	0.970353	0.269438	0.280352	0.130585	0.881237	0.604296	1.37016	0.57144	0.376075	2.30628	0.190957	1.64085	0.326178	0.356879	0	0.314303	0.543278	5.19718
VSTM2A	0.301831	0.097476	0	0.0573396	0.162027	1.1197	0.0583218	0.0283184	0.0802581	0.5494	0.203193	0.241044	0.797874	0	0	0.0963756	0.748428	0.123598	0.104887	0.550055	0	0	3.91587
RAB3A	0.618013	0.191301	0	0.407745	0.855791	2.5031	0.406478	0.178276	0.478078	0.854399	0.898499	2.38778	0.514768	0.127421	1.19377	0.516858	2.04328	0.612497	0.255686	1.78378	0.349016	0.419444	4.80131
BTN3A1	0	0	0	0.0594956	0.112632	0.122856	0.0600948	0.0848654	0.0552825	0	0.151118	0.245242	0.154624	0	0	0.0278831	0.165136	0	0.0519619	0	0.106494	0.399929	3.28801
		Abbreviation
		inIPC, interneuron intermediate progenitor cell
		FC, frontal cortex
		MSC, motor and somatosensory cortex
		TC, temporal cortex
		OC, occipital cortex
