# Supplementary material for: Cortical arealization of interneurons defines shared and distinct molecular programs in developing human and macaque brains
Source: Research Square preprint supplement (doi:10.21203/rs.3.rs-3939272/v1), 2024-02-26
Supplement: Supplementary file 2 [file 1f19d196c156a4b62850a87d.xlsx]

## Sheet: cortical mgeLin
Table S8. The Shannon Entropy quantifies the diversity of interneuron subtypes derived from the MGE and CGE in cortical areas.
transAge	species	FR	OC	MS	TP	DFC	MFC	OFC	VFC	M1C	S1C	IPC	A1C	STC	ITC	V1C	PCC	Insula	PFC	Cortex	Telencephalon	Cing	ACC
GW08	Macaque	0.497071	0
GW09	Macaque	1.5	1.12317	1.51095							1.34707								0.721928
GW10	Macaque	1.4569	1.41974
GW13	Macaque	1.68948	1.56614	1.61437	1.52023
GW15	Macaque	1.67143	1.6786		1.35415
GW16	Macaque	1.64096	1.6008	1.4534	1.49782					1.72537	1.57711	1.43427			1.71124	1.11501			1.50788
GW20	Macaque	1.83087	1.80954	2.07527	1.91821
GW26	Macaque					1.95598	1.61741	1.67403	2.03051	1.6403	1.93117	2.00933	2.29519	1.83984	1.90471	1.65438	1.67749	2.32419
GW33	Macaque					1.65665	1.20409	1.37155	1.99873	1.91912	2.04972	1.74321	2.01457	1.84078	1.93357	1.89434	1.97456	2.17147
GW11	Macaque									1.29574		1.08205			1.36096	1.24846			1.32715
GW21	Macaque									1.98629		1.92605			2.11589	1.91959		1.93414	2.03814
GW25	Macaque									2.00006	2.08022	1.9914				1.96137			1.91126
GW29	Macaque									1.6856	1.61401	1.64348				1.52773	0	1.70133
GW14	Human									0.543564	0.721928					0.33729				0.670856
GW18	Human				1.26601					1.35334	1.1853	1.37349			1.4292	1.38274			1.69566			1.24076
GW19	Human									2.05807	1.6807	1.88367			1.90114	1.71626			1.99587
GW20	Human				1.40875					2.30045	1.26036	1.28568			0.681881	1.41434			2.01838			1.32049	1.44117
GW22	Human									1.31906	1.35037	1.10651				0.596105			0.303778
GW25	Human									1.468	1.38631	1.3457			1.70211		1.4618	1.65672	1.87752
GW08	Human																			1.44645
GW07	Human																			0.32146	1.94595
GW10	Human																			0.958429
GW09	Human																			0.863121
GW12	Human																			1.06886
GW13	Human																			1.02368
GW16	Human				1.56639														1.50683
GW27	Human													1.84028					1.92709			1.82345
GW30	Human				1.75049														1.69997			1.72028
		Abbreviation
		GW, gestational weeks
		FR, frontal
		OC, occipital
		MS, putative motor-somatosensory
		TP, temporal
		PFC, prefrontal cortex
		DFC, dorsolateral frontal cortex
		OFC, orbital frontal cortex
		MFC, medial frontal cortex
		VFC, ventrolateral frontal cortex
		V1C, primary visual cortex
		M1C, primary motor cortex
		S1C, primary somatosensory cortex
		IPC, inferior parietal cortex
		PCC, posterior cingulate cortex
		ITC, inferior temporal cortex
		STC, superior temporal cortex
		A1C, primary auditory cortex
		ACC,
		Cing, cingulate
		MGE, medial ganglionic eminences
		CGE, caudal ganglionic eminences

## Sheet: cortical cgeLin
Table S8. The Shannon Entropy quantifies the diversity of interneuron subtypes derived from the MGE and CGE in cortical areas.
transAge	species	FR	OC	MS	TP	DFC	MFC	OFC	VFC	M1C	S1C	IPC	A1C	STC	ITC	V1C	PCC	Insula	PFC	Cortex	Telencephalon	Cing	ACC
GW08	Macaque	0.119893	0
GW09	Macaque	1	0	0
GW10	Macaque	0.436628	0
GW13	Macaque	0.856692	0.500968	0.882084	0.397091
GW15	Macaque	0.68777	0.760393		0.415625
GW16	Macaque	0.528063	0.745218	0.152254	0.379871					0	0	0			0	0			0
GW20	Macaque	1.15652	1.79233	1.39061	0.63129
GW26	Macaque					1.87895	1.35226	1.3889	1.81928	1.60148	2.1679	2.02794	2.10322	1.38262	1.35465	1.74847	1.12515	2.03682
GW33	Macaque					1.35607	0.815638	1.42255	1.50494	1.31561	1.75423	1.61793	1.46811	1.1964	0.964258	1.9248	1.2489	0.955656
GW11	Macaque									1		0.787127			0.757878	0.881291			0.811278
GW21	Macaque									0.745032		0.920851			0.951116	1.16025		1.49127	0.967616
GW25	Macaque									0.66793	0.581712	0.431226				0.551361			0.600748
GW29	Macaque									2.42443	2.23559	2.45019				2.29782	0.918296	2.45286
GW18	Human				1.87227					0.789075	0.596399	0.73829			0.647901	1.26916			1.88805			1.76713
GW19	Human									1.24765	0.742497	1.01778			0.668429	1.49226			1.37339
GW20	Human				1.75109					0.826738	1.26255	0.997503			0.918296	0.968133			1.61614			1.74781	1.86209
GW22	Human									1.09347	1.02991	1.08728				0			0
GW25	Human									1.46873	1.25868	1.40131			0.980308		1.05155	0.904381	1.86325
GW08	Human																			0
GW07	Human																			0	0
GW10	Human																			0
GW09	Human																			0
GW12	Human																			0
GW13	Human																			0
GW14	Human																			0
GW16	Human				1.82011														1.95056
GW27	Human													0.904493					1.03202			1.26288
GW30	Human				1.27886														1.50702			1.82121
