# Supplementary material for: Cortical arealization of interneurons defines shared and distinct molecular programs in developing human and macaque brains
Source: Research Square preprint supplement (doi:10.21203/rs.3.rs-3939272/v1), 2024-02-26
Supplement: Supplementary file 3 [file 2541cf94103b82b86cf4d770.xlsx]

## Sheet: Supplementary Data 1
Table S1. Collection of single-cell and single-nuclei transcriptomic datasets.
ID	Species	Title	DOI	PMID	Corresponding Author(s)	Year	Project	Age	Brain Region	Cell count	Cell included	Sequencing platform	Modality
1	Human	Mouse and human share conserved transcriptional programs for interneuron development	https://doi.org/10.1126/science.abj6641	34882453	Xiaoqun Wang	2021	GSE135827	GW9,12,13,16,18	GE	56,412	42583	10X Genomics	scRNA-seq
2	Human	An atlas of cortical arealization identifies dynamic molecular signatures	https://doi.org/10.1038/s41586-021-03910-8	34616070	Arnold R Kriegstein	2021	BICCN: RRID:SCR_015820 or NeMO RRID:SCR_002001	GW14,18,19,20,22,25	neocortex (PFC, motor, somatosensory, parietal, temporal and V1C), proneocortex, striatum, allocortex, hypothalamus, thalamus, GE	698,820	170378	10X Genomics	scRNA-seq
3	Human	Single-cell analysis of prenatal and postnatal human cortical development	https://doi.org/10.1126/science.adf0834	37824647	Arnold Kriegstein, Dmitry Velmeshev	2023	NeMo nemo:dat-3ah9h9x or https://pre-postnatal-cortex.cells.ucsc.edu	GW16,18,20,25,27,GW2trimester,GW3trimester(GW30)	prefrontal, cingulate, temporal, insula, cortex, MGE, CGE, LGE, GE	358663	39514	10X Genomics	snRNA-seq
4	Human	Comprehensive cell atlas of the first-trimester developing human brain	https://doi.org/10.1126/science.adf1226	37824650	Sten Linnarsson	2023	Raw sequencing data are available from the European Genome Phenome Archive (RRID:SCR_004944; accession no. EGAS00001004107).	GW7,8,9,10,12,13,14	telencephalon	1665937	53272	10X Genomics	scRNA-seq
5	Macaque	The development and evolution of inhibitory neurons in primate cerebrum	https://doi.org/10.1038/s41586-022-04510-w	35322231	Alex A. Pollen	2022	NCBI GEO GSE169122	PCD40,50,65,80,90,100	V1, PFC, motor, temporal, somatosensory, insula, CGE+LGE, parietal, hippocampus, CGE, dLGE, MGE, cingulate, MGE+CGE+LGE, LGE	109112	86899	10X Genomics	scRNA-seq
6	Macaque	Molecular programs of regional specification and neural stem cell fate progression in macaque telencephalon	https://doi.org/10.1126/science.adf3786	37824652	Nenad Sestan, Pasko Rakic	2023	NeMO nemo:dat-fjx1jbr or NCBI GEO GSE226451	E37,42,43,54,62,64,77,78,93,110	PFC (DFC, OFC, MFC, VFC), M1C, parietal (S1C, IPC, PCC), insula, temporal (ITC, STC, A1C), occipital (V1C), and three regions from GE (MGE, LGE, CGE)	761529	317474	10X Genomics	scRNA-seq
7	Macaque	Spatiotemporal transcriptomic divergence across human and macaque brain development	https://doi.org/10.1126/science.aat8077	30545855	Nenad Sestan	2018	NCBI BioProjects PRJNA448973 or Synapse in psychencode.org.	E110	hippocampus, amygdala, striatum	113274
		Abbreviation
		GW, gestational weeks
		PCD, postconceptional days
		E, embryonic
		PFC, prefrontal cortex
		DFC, dorsolateral frontal cortex
		OFC, orbital frontal cortex
		MFC, medial frontal cortex
		VFC, ventrolateral frontal cortex
		GE, ganglionic eminences
		MGE, medial ganglionic eminences
		LGE, lateral ganglionic eminences
		CGE, caudal ganglionic eminences
		V1C, primary visual cortex
		M1C, primary motor cortex
		S1C, primary somatosensory cortex
		IPC, inferior parietal cortex
		PCC, posterior cingulate cortex
		ITC, inferior temporal cortex
		STC, superior temporal cortex
		A1C, primary auditory cortex
