# Supplementary material for: Cortical arealization of interneurons defines shared and distinct molecular programs in developing human and macaque brains
Source: Research Square preprint supplement (doi:10.21203/rs.3.rs-3939272/v1), 2024-02-26
Supplement: Supplementary file 4 [file 431d0b1d2d7f19d440521055.xlsx]

## Sheet: mgeLin
Table S6. DEGs of GE or CTX enrichment in MGE-derived and CGE-derived interneurons.
p_val	avg_log2FC	pct.1	pct.2	cluster	gene	ident2	species	p_val_adj	freq
0	2.68212	0.737	0.186	CTX	MEF2C	CTX	Macaque	0	100
4.5152e-120	2.295	0.251	0.054	CTX	SST	CTX	Macaque	9.73235e-99	100
0	1.74923	0.731	0.335	CTX	NRXN1	CTX	Macaque	1.8157e-285	100
7.86996e-265	1.72207	0.557	0.169	CTX	CHL1	CTX	Macaque	1.4893e-224	100
5.51918e-195	1.61669	0.5	0.196	CTX	MAF	CTX	Macaque	1.30935e-152	100
3.44974e-281	1.51425	0.712	0.339	CTX	SYT1	CTX	Macaque	5.90679e-248	100
5.1365e-149	1.51312	0.351	0.099	CTX	ANK3	CTX	Macaque	1.49313e-121	100
5.93754e-57	1.45615	0.12	0.022	CTX	CCK	CTX	Macaque	1.91416e-52	100
3.22346e-123	1.44206	0.385	0.152	CTX	ARL6IP5	CTX	Macaque	1.02705e-109	100
4.69943e-113	1.4351	0.235	0.047	CTX	KCTD12	CTX	Macaque	3.34722e-95	100
1.21523e-114	1.42769	0.237	0.049	CTX	TENM2	CTX	Macaque	1.87546e-85	100
9.29173e-141	1.41325	0.317	0.079	CTX	DACT1	CTX	Macaque	1.29648e-108	100
3.50908e-119	1.38397	0.272	0.066	CTX	RPH3A	CTX	Macaque	1.94696e-104	100
1.20432e-103	1.36714	0.368	0.154	CTX	FABP7	CTX	Macaque	6.12181e-81	100
4.23697e-124	1.29685	0.417	0.175	CTX	PEG3	CTX	Macaque	4.69989e-91	100
1.63e-97	1.28843	0.293	0.1	CTX	KCNA3	CTX	Macaque	2.73745e-77	100
5.78426e-89	1.26467	0.176	0.031	CTX	IGF1	CTX	Macaque	2.137e-77	100
6.56449e-80	1.23235	0.19	0.046	CTX	TRIM9	CTX	Macaque	8.58193e-68	100
9.96244e-76	1.1992	0.259	0.096	CTX	MAGI2	CTX	Macaque	2.33671e-73	100
2.0174e-61	1.16787	0.153	0.039	CTX	LIMCH1	CTX	Macaque	3.07282e-47	100
1.66986e-70	1.14007	0.198	0.057	CTX	FGF14	CTX	Macaque	7.16044e-64	100
8.99948e-94	1.13133	0.388	0.191	CTX	SNAP25	CTX	Macaque	5.28491e-67	100
1.9388e-96	1.10856	0.399	0.191	CTX	GRIA1	CTX	Macaque	1.61124e-71	100
4.4739e-80	1.09935	0.205	0.053	CTX	WLS	CTX	Macaque	4.87467e-57	100
6.36638e-75	1.09207	0.195	0.05	CTX	ELFN1	CTX	Macaque	1.92912e-65	100
1.91839e-69	1.08829	0.155	0.033	CTX	NAV2	CTX	Macaque	4.43111e-55	100
9.4729e-64	1.072	0.238	0.094	CTX	NR2F1	CTX	Macaque	1.09177e-49	100
4.5734e-61	1.07137	0.157	0.041	CTX	PPP2R2B	CTX	Macaque	1.05055e-50	100
1.21391e-60	1.0576	0.194	0.065	CTX	CHMP2B	CTX	Macaque	4.62009e-48	100
3.57424e-70	1.05614	0.207	0.064	CTX	RBMS3	CTX	Macaque	8.85565e-53	100
1.51905e-65	1.01755	0.122	0.018	CTX	PTPRT	CTX	Macaque	9.78482e-48	100
4.8047e-59	1.0173	0.144	0.034	CTX	GRIN2B	CTX	Macaque	5.37441e-49	100
1.02196e-52	0.986711	0.342	0.198	CTX	VGLL4	CTX	Macaque	2.36304e-50	100
3.95322e-42	0.976793	0.134	0.042	CTX	DCN	CTX	Macaque	1.8811e-36	100
9.50801e-49	0.958262	0.291	0.161	CTX	TTC28	CTX	Macaque	2.51755e-35	100
3.34066e-46	0.938138	0.147	0.048	CTX	KLHL5	CTX	Macaque	6.90847e-31	100
1.27174e-50	0.936938	0.141	0.04	CTX	XKR4	CTX	Macaque	1.66585e-36	100
2.26965e-54	0.932535	0.321	0.175	CTX	MAFB	CTX	Macaque	5.4722e-33	100
1.22041e-51	0.923343	0.212	0.087	CTX	NPAS3	CTX	Macaque	9.96831e-37	100
2.91636e-49	0.877262	0.182	0.068	CTX	NTRK2	CTX	Macaque	5.79181e-33	100
6.48692e-144	0.873653	0.743	0.503	CTX	RTN1	CTX	Macaque	3.1721e-122	100
2.77602e-44	0.864316	0.156	0.056	CTX	SEMA6A	CTX	Macaque	9.29155e-29	100
2.97379e-55	0.86219	0.34	0.19	CTX	NME2	CTX	Macaque	1.26823e-33	100
8.00721e-40	0.859989	0.203	0.096	CTX	NXPH2	CTX	Macaque	4.07616e-29	100
4.00003e-42	0.848104	0.161	0.062	CTX	SCN3B	CTX	Macaque	2.08313e-24	100
3.71038e-40	0.832111	0.329	0.216	CTX	RASAL2	CTX	Macaque	2.21329e-26	100
4.46947e-39	0.829525	0.159	0.064	CTX	EFNB2	CTX	Macaque	1.01098e-22	100
8.37683e-40	0.806975	0.333	0.215	CTX	ATCAY	CTX	Macaque	7.3749e-29	100
1.00325e-51	0.787706	0.147	0.041	CTX	NPAS1	CTX	Macaque	8.53213e-31	100
7.93179e-46	0.78054	0.149	0.049	CTX	SYT13	CTX	Macaque	1.46168e-23	100
1.08299e-28	0.775513	0.142	0.064	CTX	SMARCA2	CTX	Macaque	1.01808e-18	100
2.90463e-37	0.774025	0.116	0.036	CTX	PCLO	CTX	Macaque	2.27315e-22	100
4.90998e-33	0.767621	0.321	0.213	CTX	GRIA2	CTX	Macaque	1.15015e-21	100
3.68647e-40	0.765327	0.394	0.273	CTX	CSRNP3	CTX	Macaque	3.98262e-31	100
7.46875e-32	0.762307	0.223	0.125	CTX	ATP9A	CTX	Macaque	4.4259e-20	100
1.46404e-59	0.758261	0.575	0.453	CTX	ARL4C	CTX	Macaque	4.89334e-43	100
6.79311e-29	0.74799	0.151	0.07	CTX	ANKS1B	CTX	Macaque	8.49935e-18	100
1.07148e-50	0.743764	0.602	0.526	CTX	ANKRD12	CTX	Macaque	1.46477e-44	100
6.4249e-25	0.730498	0.22	0.137	CTX	CXXC4	CTX	Macaque	2.81776e-14	100
1.08742e-26	0.727719	0.177	0.093	CTX	PURG	CTX	Macaque	2.88402e-18	100
3.73506e-30	0.727667	0.239	0.144	CTX	LRP8	CTX	Macaque	1.19484e-12	100
1.76588e-32	0.726249	0.272	0.163	CTX	PCDHAC2	CTX	Macaque	1.49139e-18	100
4.06784e-28	0.718771	0.313	0.216	CTX	LRRC7	CTX	Macaque	3.75282e-17	100
5.14402e-27	0.718092	0.163	0.082	CTX	NTN4	CTX	Macaque	1.73752e-18	100
1.05013e-27	0.703682	0.296	0.201	CTX	SCG5	CTX	Macaque	5.09268e-20	100
1.86529e-30	0.698145	0.303	0.2	CTX	UCHL1	CTX	Macaque	1.86254e-19	100
8.58812e-24	0.69685	0.12	0.054	CTX	TSPAN2	CTX	Macaque	1.25304e-16	100
3.10189e-21	0.692823	0.209	0.131	CTX	IDS	CTX	Macaque	2.44712e-15	100
5.52956e-30	0.691992	0.168	0.08	CTX	PTPRD	CTX	Macaque	1.49192e-16	100
2.66118e-32	0.691393	0.211	0.111	CTX	SH3BP5	CTX	Macaque	6.65929e-16	100
1.03986e-34	0.687959	0.124	0.044	CTX	ATP8A2	CTX	Macaque	8.89048e-16	100
2.45531e-31	0.687883	0.35	0.254	CTX	GNAO1	CTX	Macaque	8.93363e-15	100
2.67743e-35	0.687704	0.133	0.048	CTX	TOX2	CTX	Macaque	4.04983e-24	100
3.65388e-37	0.685912	0.432	0.326	CTX	GNG2	CTX	Macaque	2.34522e-27	100
7.61665e-22	0.685023	0.177	0.102	CTX	GABRA2	CTX	Macaque	7.64663e-14	100
1.81393e-22	0.684717	0.251	0.169	CTX	NUP93	CTX	Macaque	8.99481e-14	100
3.05905e-28	0.675418	0.15	0.07	CTX	DNM3	CTX	Macaque	3.52858e-17	100
1.17551e-56	0.673573	0.643	0.573	CTX	QKI	CTX	Macaque	6.30914e-38	100
1.80146e-28	0.67331	0.278	0.18	CTX	SCAMP1	CTX	Macaque	1.1063e-13	100
3.97589e-19	0.672294	0.186	0.116	CTX	USP46	CTX	Macaque	1.05551e-11	100
1.1892e-32	0.670575	0.365	0.258	CTX	MAPT	CTX	Macaque	1.49883e-19	100
1.33759e-27	0.667389	0.177	0.092	CTX	BACH2	CTX	Macaque	7.1638e-16	100
4.54592e-26	0.66015	0.242	0.151	CTX	TCEAL2	CTX	Macaque	5.09537e-15	100
1.15327e-20	0.656683	0.234	0.158	CTX	DPF1	CTX	Macaque	5.12192e-13	100
8.30271e-27	0.649518	0.182	0.097	CTX	MLLT3	CTX	Macaque	3.14001e-10	100
2.03112e-17	0.639772	0.157	0.094	CTX	CDK14	CTX	Macaque	2.25912e-10	100
2.71966e-32	0.63827	0.291	0.179	CTX	ATP6V0C	CTX	Macaque	1.40691e-15	100
7.9213e-26	0.634382	0.169	0.089	CTX	SV2A	CTX	Macaque	1.95041e-12	100
2.27493e-15	0.633258	0.115	0.064	CTX	KHDRBS3	CTX	Macaque	6.08087e-08	100
3.91337e-25	0.630246	0.234	0.147	CTX	NRXN2	CTX	Macaque	2.66665e-12	100
2.12385e-13	0.62231	0.166	0.112	CTX	NCOA2	CTX	Macaque	3.86622e-09	100
2.23968e-11	0.61993	0.113	0.069	CTX	NKAIN2	CTX	Macaque	3.74515e-09	100
3.44519e-22	0.619698	0.354	0.274	CTX	NDUFA13	CTX	Macaque	1.16925e-16	100
2.95484e-13	0.616384	0.304	0.253	CTX	NETO2	CTX	Macaque	3.0733e-06	100
1.72668e-28	0.616366	0.254	0.152	CTX	LY6H	CTX	Macaque	7.12603e-16	100
2.27307e-45	0.615143	0.507	0.383	CTX	MATR3	CTX	Macaque	2.53197e-25	100
8.90391e-24	0.611574	0.39	0.324	CTX	AMER2	CTX	Macaque	8.29209e-10	100
9.36798e-14	0.611184	0.218	0.16	CTX	FNBP1	CTX	Macaque	2.52248e-07	100
2.60533e-41	0.60888	0.622	0.579	CTX	ZEB2	CTX	Macaque	3.28751e-19	100
7.18771e-18	0.607112	0.292	0.221	CTX	MSRA	CTX	Macaque	7.3442e-11	100
2.15232e-19	0.603356	0.309	0.239	CTX	AAK1	CTX	Macaque	6.84334e-06	100
1.73459e-19	0.602705	0.143	0.077	CTX	BRINP2	CTX	Macaque	2.12531e-11	100
1.50153e-20	0.600747	0.11	0.05	CTX	JPH4	CTX	Macaque	1.66965e-16	100
2.07701e-20	0.597846	0.11	0.051	CTX	SRCIN1	CTX	Macaque	8.69786e-12	100
1.12608e-18	0.590376	0.139	0.077	CTX	CADM3	CTX	Macaque	4.74222e-10	100
5.66583e-24	0.588953	0.498	0.429	CTX	ERBB4	CTX	Macaque	7.91361e-16	100
2.02924e-30	0.581062	0.499	0.416	CTX	CELF4	CTX	Macaque	2.33782e-21	100
3.46662e-23	0.580382	0.123	0.057	CTX	ARID5B	CTX	Macaque	1.74516e-07	100
3.36885e-15	0.579955	0.291	0.23	CTX	THRA	CTX	Macaque	1.54281e-08	100
2.35763e-16	0.579934	0.234	0.169	CTX	CUX2	CTX	Macaque	1.55332e-05	100
3.85903e-74	0.579502	0.784	0.747	CTX	NREP	CTX	Macaque	1.69387e-54	100
2.1282e-19	0.577351	0.128	0.066	CTX	PNMA2	CTX	Macaque	3.00575e-09	100
7.89051e-25	0.572949	0.307	0.208	CTX	U2AF1	CTX	Macaque	1.26758e-13	100
9.58177e-19	0.572743	0.383	0.328	CTX	APP	CTX	Macaque	2.52876e-08	100
2.30552e-13	0.571764	0.192	0.134	CTX	TUBB4A	CTX	Macaque	9.11426e-07	100
2.04579e-17	0.570791	0.183	0.116	CTX	TMOD2	CTX	Macaque	6.35951e-07	100
1.43038e-21	0.56723	0.234	0.154	CTX	RAB3A	CTX	Macaque	4.8371e-07	100
3.49464e-16	0.56232	0.171	0.109	CTX	MAGI1	CTX	Macaque	5.89351e-06	100
3.15579e-15	0.559234	0.114	0.063	CTX	HIVEP3	CTX	Macaque	2.94383e-08	100
2.3842e-19	0.558391	0.109	0.051	CTX	CNTNAP2	CTX	Macaque	2.88124e-09	100
2.02715e-15	0.558125	0.223	0.16	CTX	CELF5	CTX	Macaque	4.67605e-07	100
3.20728e-19	0.557225	0.294	0.215	CTX	PDE4D	CTX	Macaque	7.15387e-07	100
1.37437e-09	0.556782	0.187	0.143	CTX	PITPNC1	CTX	Macaque	0.000110581	100
5.90579e-19	0.555436	0.174	0.106	CTX	STXBP1	CTX	Macaque	2.67507e-07	100
2.5017e-09	0.554803	0.274	0.236	CTX	EVL	CTX	Macaque	2.05878e-05	100
1.37591e-15	0.552873	0.145	0.087	CTX	CNIH2	CTX	Macaque	5.77224e-06	100
2.38984e-24	0.547199	0.41	0.326	CTX	PCSK1N	CTX	Macaque	3.19596e-13	100
5.16071e-19	0.546179	0.478	0.443	CTX	LUC7L3	CTX	Macaque	7.80462e-12	100
7.63438e-20	0.536886	0.36	0.292	CTX	KIF5C	CTX	Macaque	2.10419e-08	100
6.56836e-11	0.536362	0.25	0.198	CTX	KIFAP3	CTX	Macaque	9.36171e-07	100
5.56256e-56	0.532457	0.759	0.745	CTX	CALM1	CTX	Macaque	6.89899e-33	100
2.49662e-77	0.530216	0.883	0.834	CTX	DCX	CTX	Macaque	1.86981e-59	100
2.31631e-28	0.528172	0.382	0.278	CTX	WDR83OS	CTX	Macaque	5.95233e-12	100
1.84759e-15	0.526313	0.178	0.118	CTX	TUSC3	CTX	Macaque	2.51748e-05	100
1.84979e-15	0.52448	0.273	0.208	CTX	CADPS	CTX	Macaque	4.98201e-05	100
8.7606e-12	0.517213	0.161	0.111	CTX	CHCHD10	CTX	Macaque	7.26227e-05	100
7.40201e-16	0.511819	0.115	0.063	CTX	NCS1	CTX	Macaque	3.5931e-06	100
2.39688e-12	0.509898	0.134	0.084	CTX	THY1	CTX	Macaque	5.39718e-06	100
6.32401e-20	0.506489	0.256	0.181	CTX	SEZ6L2	CTX	Macaque	7.73038e-05	100
2.8401e-14	0.505515	0.326	0.271	CTX	GNAQ	CTX	Macaque	0.000285729	100
5.88767e-35	0.503572	0.572	0.492	CTX	NUCKS1	CTX	Macaque	3.36665e-20	100
7.69369e-19	0.503185	0.323	0.24	CTX	RNASEK	CTX	Macaque	1.02327e-09	100
3.40772e-16	0.498128	0.144	0.083	CTX	DSCAML1	CTX	Macaque	1.70533e-07	100
2.57238e-14	0.49771	0.359	0.317	CTX	SPTAN1	CTX	Macaque	0.000417221	100
3.39349e-17	0.496004	0.443	0.392	CTX	MIF	CTX	Macaque	1.74554e-09	100
1.30039e-14	0.491952	0.161	0.103	CTX	FAM171A2	CTX	Macaque	0.000594145	100
4.51205e-10	0.488563	0.175	0.126	CTX	NMNAT2	CTX	Macaque	1.33137e-05	100
3.58475e-17	0.487857	0.119	0.063	CTX	CAMK1D	CTX	Macaque	1.05387e-05	100
1.69037e-23	0.485843	0.535	0.502	CTX	RAB2A	CTX	Macaque	2.96363e-12	100
8.11013e-15	0.484863	0.141	0.084	CTX	TRAPPC5	CTX	Macaque	0.000196781	100
2.53324e-10	0.482994	0.16	0.111	CTX	COMMD3	CTX	Macaque	0.000177523	100
2.02435e-51	0.481564	0.746	0.702	CTX	GPM6A	CTX	Macaque	3.57266e-28	100
1.38215e-15	0.479504	0.254	0.184	CTX	HYPK	CTX	Macaque	3.26857e-07	100
2.42543e-13	0.477292	0.122	0.073	CTX	SCRT2	CTX	Macaque	0.000367288	100
1.6288e-21	0.466662	0.504	0.451	CTX	RBFOX2	CTX	Macaque	8.24371e-09	100
1.61596e-08	0.465816	0.151	0.107	CTX	NPDC1	CTX	Macaque	3.71469e-05	100
5.1011e-49	0.465624	0.869	0.882	CTX	PTMA	CTX	Macaque	1.19531e-38	100
3.03712e-27	0.458353	0.619	0.588	CTX	CEP170	CTX	Macaque	7.06575e-11	100
1.14524e-12	0.453655	0.362	0.314	CTX	MYT1L	CTX	Macaque	0.000468159	100
2.50407e-17	0.445723	0.131	0.071	CTX	MAZ	CTX	Macaque	0.000741828	100
7.91105e-16	0.442393	0.115	0.062	CTX	ELMO1	CTX	Macaque	0.000197714	100
4.65243e-12	0.42615	0.413	0.374	CTX	STMN4	CTX	Macaque	0.000988615	100
7.65507e-15	0.42556	0.157	0.097	CTX	PCDH8	CTX	Macaque	0.00046149	100
1.01324e-12	0.424595	0.556	0.566	CTX	NDUFA4	CTX	Macaque	1.26335e-08	100
1.27618e-08	0.416253	0.238	0.192	CTX	NGRN	CTX	Macaque	0.000728579	100
1.81383e-32	0.414484	0.603	0.447	CTX	EEF1G	CTX	Macaque	1.71463e-20	100
8.00524e-42	0.399288	0.733	0.587	CTX	UBB	CTX	Macaque	1.87212e-25	100
2.03338e-07	0.391868	0.518	0.53	CTX	TXN	CTX	Macaque	0.000301596	100
4.9704e-55	0.377515	0.919	0.937	CTX	TCF4	CTX	Macaque	2.65919e-37	100
1.54212e-22	0.339924	0.698	0.664	CTX	SOX2	CTX	Macaque	4.95465e-13	100
6.14224e-21	0.315062	0.689	0.65	CTX	RUNX1T1	CTX	Macaque	1.12717e-10	100
1.46327e-51	0.878466	0.11	0.021	CTX	MPPED1	CTX	Macaque	1.10834e-45	99
5.99978e-18	0.55032	0.173	0.107	CTX	TMEM178B	CTX	Macaque	0.000185146	99
7.10703e-12	0.505661	0.162	0.111	CTX	GABRB3	CTX	Macaque	0.000522544	99
6.8961e-12	0.500946	0.265	0.214	CTX	SRPK2	CTX	Macaque	0.0012733	99
1.01807e-09	0.484132	0.131	0.088	CTX	MRPS24	CTX	Macaque	0.000616294	99
2.80957e-10	0.476924	0.191	0.14	CTX	ASXL3	CTX	Macaque	0.000214813	99
1.28185e-11	0.474186	0.195	0.141	CTX	KIAA0408	CTX	Macaque	3.02373e-05	99
1.40968e-08	0.382567	0.476	0.467	CTX	MYCBP2	CTX	Macaque	0.00190737	99
6.77925e-13	0.336958	0.636	0.652	CTX	NCAM1	CTX	Macaque	2.67227e-05	99
9.2408e-10	0.5261	0.176	0.131	CTX	SEC14L1	CTX	Macaque	0.000782654	98
9.21505e-08	0.483205	0.244	0.204	CTX	SCN3A	CTX	Macaque	0.00172121	98
9.20209e-08	0.482375	0.307	0.276	CTX	PODXL2	CTX	Macaque	0.000128715	98
3.21074e-14	0.451655	0.26	0.197	CTX	NXPH1	CTX	Macaque	0.000635344	98
9.74833e-12	0.444468	0.12	0.074	CTX	SERP2	CTX	Macaque	0.00128673	98
1.95874e-10	0.519753	0.113	0.071	CTX	THSD7A	CTX	Macaque	0.000992157	97
3.80717e-08	0.502235	0.262	0.227	CTX	SBK1	CTX	Macaque	0.00178565	97
4.68023e-08	0.490317	0.127	0.091	CTX	RUSC1	CTX	Macaque	0.00235095	97
1.95479e-12	0.469628	0.282	0.225	CTX	SLC6A1	CTX	Macaque	0.000617391	97
4.8076e-11	0.441735	0.239	0.184	CTX	NUDT4	CTX	Macaque	0.000228306	97
9.87565e-10	0.422382	0.208	0.159	CTX	MZT2B	CTX	Macaque	0.00140932	97
4.18396e-10	0.389015	0.492	0.484	CTX	KIDINS220	CTX	Macaque	0.000889261	97
4.77758e-11	0.386177	0.528	0.527	CTX	APC	CTX	Macaque	0.00119246	97
2.39153e-36	0.701708	0.106	0.03	CTX	NCAM2	CTX	Macaque	1.4752e-21	96
9.35419e-22	0.611219	0.106	0.047	CTX	ATP1A1	CTX	Macaque	4.59078e-11	96
2.90707e-08	0.480581	0.261	0.221	CTX	NBEA	CTX	Macaque	0.00139323	96
1.14351e-10	0.466986	0.106	0.065	CTX	PIK3R2	CTX	Macaque	0.000150567	96
1.50311e-06	0.495395	0.158	0.124	CTX	GNPTAB	CTX	Macaque	0.000610964	95
3.56061e-09	0.454153	0.385	0.362	CTX	EIF4A1	CTX	Macaque	0.00125342	95
7.3947e-07	0.51176	0.197	0.164	CTX	XPR1	CTX	Macaque	0.00211491	94
2.71031e-12	0.494646	0.142	0.092	CTX	ZC3H6	CTX	Macaque	0.000678703	94
1.90042e-11	0.485606	0.107	0.064	CTX	CCDC136	CTX	Macaque	0.000475001	94
3.19843e-12	0.46269	0.141	0.091	CTX	MTUS1	CTX	Macaque	0.000364289	94
1.75348e-07	0.369428	0.265	0.221	CTX	TMEFF1	CTX	Macaque	0.00116751	94
3.83652e-08	0.278257	0.623	0.645	CTX	ZNF704	CTX	Macaque	0.00116138	94
1.05101e-69	1.34428	0.106	0.008	CTX	PTGDS	CTX	Macaque	1.22823e-59	93
6.55647e-12	0.448542	0.207	0.153	CTX	IRF2BPL	CTX	Macaque	0.00207775	93
2.71111e-08	0.446089	0.399	0.386	CTX	EEF1B2	CTX	Macaque	0.00281615	93
7.39009e-36	0.814903	0.104	0.03	CTX	FAT3	CTX	Macaque	5.37824e-30	92
2.45069e-09	0.464629	0.174	0.13	CTX	PREPL	CTX	Macaque	0.00256094	92
1.30453e-10	0.442413	0.143	0.096	CTX	SPINT2	CTX	Macaque	0.00191353	92
1.10318e-07	0.491653	0.225	0.187	CTX	REV3L	CTX	Macaque	0.00163395	91
3.50558e-07	0.458247	0.114	0.081	CTX	RAC3	CTX	Macaque	0.00260837	91
1.32889e-06	0.445639	0.178	0.143	CTX	SRSF9	CTX	Macaque	0.00233986	91
3.05998e-10	0.444416	0.12	0.078	CTX	SLC8A1	CTX	Macaque	0.00371022	91
9.82705e-12	0.402509	0.421	0.391	CTX	KLC1	CTX	Macaque	0.00243521	91
9.1818e-31	0.672505	0.107	0.036	CTX	VSTM2A	CTX	Macaque	6.19905e-20	90
6.19893e-13	0.465372	0.17	0.115	CTX	C1QTNF4	CTX	Macaque	0.00103183	90
2.10695e-06	0.455187	0.135	0.102	CTX	PGM2L1	CTX	Macaque	0.00381414	90
8.62039e-12	0.416374	0.428	0.403	CTX	BANF1	CTX	Macaque	0.00290998	90
1.58623e-31	0.714932	0.101	0.032	CTX	ZBTB38	CTX	Macaque	1.70979e-22	89
5.28785e-13	0.486829	0.102	0.057	CTX	LRP3	CTX	Macaque	8.25827e-06	89
5.17255e-13	0.469461	0.296	0.243	CTX	ANK2	CTX	Macaque	0.00213662	89
6.73849e-07	0.462862	0.125	0.092	CTX	CTNND2	CTX	Macaque	0.00337182	89
3.48961e-13	0.433786	0.225	0.163	CTX	SOGA3	CTX	Macaque	0.00120234	89
9.93202e-28	0.595272	0.105	0.037	CTX	RBMS1	CTX	Macaque	5.55976e-18	88
1.85441e-07	0.393613	0.181	0.14	CTX	DPP6	CTX	Macaque	0.00201543	88
4.20777e-09	0.35883	0.496	0.498	CTX	TCEAL4	CTX	Macaque	0.00355334	88
1.15091e-09	0.412183	0.135	0.091	CTX	SPATS2L	CTX	Macaque	0.00482398	87
4.80331e-09	0.405861	0.116	0.077	CTX	ENO2	CTX	Macaque	0.00329505	87
7.38119e-07	0.442739	0.131	0.096	CTX	TOMM5	CTX	Macaque	0.0031285	86
4.09578e-08	0.436175	0.172	0.131	CTX	VAMP2	CTX	Macaque	0.004877	86
1.50116e-06	0.361386	0.368	0.342	CTX	CHD2	CTX	Macaque	0.00300695	85
8.13202e-12	0.493943	0.106	0.062	CTX	GRIK2	CTX	Macaque	6.12967e-05	84
5.18849e-09	0.45461	0.119	0.08	CTX	BCAT1	CTX	Macaque	0.00410696	84
1.43645e-10	0.495031	0.104	0.063	CTX	GPR27	CTX	Macaque	6.14082e-07	83
2.47028e-07	0.431943	0.114	0.08	CTX	MCF2L	CTX	Macaque	0.00271599	83
1.43858e-07	0.441426	0.125	0.09	CTX	ARL2	CTX	Macaque	0.00418965	82
3.04428e-08	0.439041	0.144	0.105	CTX	CHCHD6	CTX	Macaque	0.00578202	82
1.61863e-31	0.68423	0.104	0.034	CTX	EEF1A2	CTX	Macaque	1.80126e-20	81
7.32527e-22	0.612237	0.103	0.044	CTX	CHD5	CTX	Macaque	2.90721e-15	81
3.19498e-17	0.486686	0.11	0.056	CTX	RAB9B	CTX	Macaque	5.22212e-06	81
4.51178e-08	0.463534	0.144	0.107	CTX	CDC42EP3	CTX	Macaque	0.00259167	80
8.3154e-07	0.515298	0.239	0.208	CTX	SRGAP1	CTX	Macaque	0.00611539	76
5.52859e-10	0.449164	0.131	0.087	CTX	WSB2	CTX	Macaque	0.00648866	76
1.36322e-06	0.409046	0.139	0.105	CTX	STUB1	CTX	Macaque	0.0059199	76
5.47253e-10	0.471825	0.192	0.145	CTX	TNRC6C	CTX	Macaque	0.00622343	74
1.80364e-08	0.465162	0.14	0.101	CTX	APRT	CTX	Macaque	0.00515273	74
1.04952e-06	0.446335	0.237	0.202	CTX	NHP2	CTX	Macaque	0.0043973	74
2.34785e-07	0.418506	0.101	0.069	CTX	EPS15	CTX	Macaque	0.00456523	74
9.19979e-14	0.411593	0.114	0.065	CTX	MAPRE3	CTX	Macaque	0.00241973	74
1.47231e-12	0.447643	0.113	0.068	CTX	ATP6V1B2	CTX	Macaque	0.00713073	73
4.48471e-16	0.259316	0.631	0.617	CTX	INA	CTX	Macaque	7.92757e-05	71
1.7321e-30	0.631248	0.111	0.039	CTX	DMD	CTX	Macaque	1.53308e-15	69
9.34681e-09	0.431029	0.128	0.089	CTX	PIP4K2B	CTX	Macaque	0.00557654	68
1.00915e-06	0.416792	0.381	0.369	CTX	ATXN7L3B	CTX	Macaque	0.00578641	67
1.83794e-12	0.474631	0.104	0.059	CTX	SHANK2	CTX	Macaque	1.74051e-05	65
1.01007e-08	0.439688	0.253	0.21	CTX	DLGAP1	CTX	Macaque	0.00688575	65
3.41571e-07	0.439163	0.162	0.126	CTX	ARF3	CTX	Macaque	0.00807107	65
1.52176e-10	0.451219	0.158	0.113	CTX	FUOM	CTX	Macaque	0.00650994	64
5.91894e-10	0.280899	0.588	0.614	CTX	ZNF428	CTX	Macaque	0.00545315	64
4.06673e-07	0.469065	0.2	0.166	CTX	KIF3C	CTX	Macaque	0.0068952	63
2.51009e-08	0.403854	0.302	0.269	CTX	NDN	CTX	Macaque	0.00609974	63
1.29214e-49	0.235674	0.996	0.997	CTX	STMN1	CTX	Macaque	7.41416e-34	63
1.39966e-06	0.484656	0.224	0.194	CTX	ATAT1	CTX	Macaque	0.00695414	62
6.57988e-32	0.691208	0.107	0.035	CTX	GABBR2	CTX	Macaque	3.05336e-22	61
6.10496e-08	0.440158	0.131	0.094	CTX	ENHO	CTX	Macaque	0.00595352	60
2.01538e-07	0.403862	0.14	0.102	CTX	APC2	CTX	Macaque	0.00563695	60
1.75484e-08	0.432214	0.405	0.398	CTX	ATP6V1F	CTX	Macaque	0.00488837	59
4.73211e-09	0.510092	0.1	0.064	CTX	SYNE1	CTX	Macaque	0.000270164	56
1.12429e-06	0.415707	0.115	0.084	CTX	CDKN2D	CTX	Macaque	0.00894274	56
4.15634e-12	0.255643	0.7	0.711	CTX	HSPA8	CTX	Macaque	9.08884e-06	56
3.15133e-06	0.481434	0.256	0.23	CTX	ZRANB2	CTX	Macaque	0.0100274	54
3.45388e-08	0.465699	0.22	0.183	CTX	CTXN1	CTX	Macaque	0.00874908	54
8.66804e-09	0.456963	0.157	0.115	CTX	PLEKHA5	CTX	Macaque	0.00545598	54
5.60421e-07	0.437176	0.164	0.129	CTX	MEF2A	CTX	Macaque	0.00967793	52
1.9521e-07	0.432174	0.172	0.133	CTX	ARL9	CTX	Macaque	0.00553524	51
1.18433e-16	0.528981	0.1	0.049	CTX	CAMK4	CTX	Macaque	4.16632e-09	50
7.08151e-07	0.456988	0.13	0.098	CTX	FJX1	CTX	Macaque	0.0052464	50
5.04739e-08	0.436369	0.13	0.093	CTX	HSDL1	CTX	Macaque	0.00970284	50
3.05588e-07	0.444224	0.202	0.165	CTX	JARID2	CTX	Macaque	0.00961415	49
4.12776e-07	0.427825	0.157	0.12	CTX	PRKACB	CTX	Macaque	0.0071154	48
3.5207e-09	0.380283	0.1	0.063	CTX	NUDT3	CTX	Macaque	0.0047724	48
2.08868e-08	0.371371	0.134	0.094	CTX	RGS17	CTX	Macaque	0.0115687	48
1.93827e-06	0.371702	0.131	0.098	CTX	AK1	CTX	Macaque	0.0129542	47
2.31192e-08	0.369203	0.131	0.09	CTX	LAMP3	CTX	Macaque	0.00782904	47
1.47708e-06	0.471082	0.16	0.127	CTX	TRIO	CTX	Macaque	0.00573783	46
4.02716e-07	0.469592	0.1	0.069	CTX	CBFA2T3	CTX	Macaque	0.00101986	46
1.74571e-06	0.337527	0.133	0.098	CTX	SERF1A	CTX	Macaque	0.0109018	46
3.41683e-39	0.687634	0.107	0.029	CTX	CDH8	CTX	Macaque	8.30116e-23	45
1.71758e-07	0.420338	0.299	0.271	CTX	RABAC1	CTX	Macaque	0.0075481	45
1.61206e-06	0.415818	0.351	0.337	CTX	BEX4	CTX	Macaque	0.00845266	45
2.83582e-11	0.435548	0.26	0.209	CTX	REEP1	CTX	Macaque	0.00693529	43
3.25545e-09	0.458968	0.102	0.065	CTX	PCDH19	CTX	Macaque	0.00124874	42
5.54351e-07	0.436637	0.1	0.068	CTX	SPIRE1	CTX	Macaque	0.00137363	41
2.50689e-06	0.428799	0.313	0.289	CTX	ZNF148	CTX	Macaque	0.00784277	41
1.28407e-06	0.387924	0.415	0.413	CTX	CELF2	CTX	Macaque	0.00852775	38
6.16662e-10	0.244546	0.715	0.75	CTX	MLLT11	CTX	Macaque	0.00025391	38
1.40676e-24	0.591495	0.107	0.043	CTX	PAM	CTX	Macaque	2.66298e-15	37
1.56616e-07	0.452951	0.17	0.132	CTX	WRN	CTX	Macaque	0.0102307	37
6.07898e-07	0.420632	0.122	0.088	CTX	EEA1	CTX	Macaque	0.00955237	37
1.07585e-07	0.362803	0.445	0.438	CTX	TRIM2	CTX	Macaque	0.00831551	37
1.82199e-06	0.414152	0.148	0.114	CTX	ACTL6B	CTX	Macaque	0.0125101	35
2.51904e-07	0.397997	0.115	0.081	CTX	LRRC4B	CTX	Macaque	0.0147944	35
8.63057e-08	0.368343	0.134	0.096	CTX	DIABLO	CTX	Macaque	0.0112281	35
1.52342e-06	0.405992	0.126	0.093	CTX	DLGAP2	CTX	Macaque	0.0110693	34
1.42454e-07	0.455231	0.208	0.171	CTX	SUGP2	CTX	Macaque	0.0119482	31
2.58345e-06	0.43742	0.135	0.103	CTX	CCNH	CTX	Macaque	0.010323	31
4.98121e-09	0.389188	0.165	0.12	CTX	PAM16	CTX	Macaque	0.0103231	31
2.08599e-07	0.468267	0.174	0.137	CTX	MTURN	CTX	Macaque	0.00969404	30
1.7549e-06	0.434956	0.129	0.097	CTX	LENG8	CTX	Macaque	0.00973006	30
5.07984e-07	0.42858	0.152	0.116	CTX	ZNRF1	CTX	Macaque	0.00824046	30
8.21935e-08	0.381494	0.1	0.066	CTX	RBFA	CTX	Macaque	0.00431052	29
6.11389e-32	0.676461	0.104	0.033	CTX	STK32B	CTX	Macaque	2.4123e-25	28
4.69584e-07	0.389636	0.106	0.074	CTX	ARL15	CTX	Macaque	0.0118792	28
3.42465e-09	0.328541	0.528	0.529	CTX	DST	CTX	Macaque	0.0106151	28
9.12502e-09	0.455783	0.144	0.105	CTX	AGFG1	CTX	Macaque	0.0142756	27
8.78971e-08	0.241146	0.676	0.736	CTX	DDX17	CTX	Macaque	0.00348977	27
4.91327e-07	0.363364	0.114	0.081	CTX	AFF3	CTX	Macaque	0.00943321	25
1.28776e-06	0.356651	0.206	0.168	CTX	PDZRN4	CTX	Macaque	0.0114769	25
5.66979e-09	0.262074	0.609	0.628	CTX	BEX1	CTX	Macaque	0.0113328	25
1.2548e-08	0.475637	0.1	0.065	CTX	OXR1	CTX	Macaque	0.000167767	24
1.19632e-06	0.428966	0.249	0.219	CTX	AP2S1	CTX	Macaque	0.00961335	24
3.52318e-08	0.391723	0.4	0.38	CTX	PHPT1	CTX	Macaque	0.00648659	23
7.47851e-11	0.340727	0.221	0.165	CTX	PLK2	CTX	Macaque	0.00934504	23
2.26996e-14	0.517563	0.103	0.055	CTX	SAMD1	CTX	Macaque	1.75898e-10	22
3.18084e-13	0.473673	0.102	0.056	CTX	PLA2G12A	CTX	Macaque	6.60331e-08	22
2.57903e-06	0.419386	0.323	0.3	CTX	PRRC2B	CTX	Macaque	0.0125479	22
3.42057e-06	0.386594	0.172	0.138	CTX	COX16	CTX	Macaque	0.00813846	22
2.71908e-06	0.440754	0.16	0.129	CTX	WASF1	CTX	Macaque	0.0137299	21
1.50594e-07	0.434981	0.124	0.089	CTX	PPP3CB	CTX	Macaque	0.00806388	21
1.70747e-06	0.429631	0.122	0.091	CTX	CMAS	CTX	Macaque	0.0104889	21
3.4056e-06	0.414533	0.262	0.233	CTX	TMEM160	CTX	Macaque	0.0166887	21
7.4529e-10	0.234923	0.694	0.711	CTX	GAPDH	CTX	Macaque	0.00584533	21
5.06991e-07	0.432796	0.211	0.175	CTX	DDX39B	CTX	Macaque	0.0106721	20
2.0642e-06	0.38606	0.206	0.171	CTX	PTPRZ1	CTX	Macaque	0.010904	20
2.80267e-12	0.417224	0.102	0.058	CTX	ATP1A3	CTX	Macaque	0.000197873	19
2.94176e-06	0.375465	0.383	0.367	CTX	SETBP1	CTX	Macaque	0.0111616	19
1.60165e-11	0.499898	0.1	0.059	CTX	PYGO1	CTX	Macaque	1.38781e-07	18
1.37702e-17	0.548269	0.1	0.048	CTX	CACNA1E	CTX	Macaque	2.22289e-11	17
9.06668e-07	0.377457	0.228	0.192	CTX	RSRP1	CTX	Macaque	0.0159939	17
2.39179e-06	0.369605	0.162	0.125	CTX	OLFM2	CTX	Macaque	0.0179595	17
2.34351e-06	0.41984	0.269	0.24	CTX	DPYSL5	CTX	Macaque	0.0132644	16
5.73032e-10	0.235387	0.779	0.829	CTX	CCNI	CTX	Macaque	1.81643e-05	16
2.44061e-06	0.448193	0.122	0.091	CTX	MMD	CTX	Macaque	0.0155645	15
6.51105e-07	0.415271	0.147	0.112	CTX	SOBP	CTX	Macaque	0.0131242	15
1.45149e-09	0.468552	0.1	0.063	CTX	CELSR2	CTX	Macaque	6.21832e-05	14
2.68566e-07	0.422785	0.1	0.068	CTX	MGAT5	CTX	Macaque	0.00541445	14
8.35094e-07	0.415119	0.11	0.079	CTX	RNF187	CTX	Macaque	0.0198401	14
1.06103e-07	0.409762	0.14	0.102	CTX	DAPK1	CTX	Macaque	0.0165035	14
4.36552e-07	0.390557	0.127	0.093	CTX	ABR	CTX	Macaque	0.0140724	14
2.90878e-06	0.443141	0.164	0.132	CTX	MRFAP1L1	CTX	Macaque	0.0131759	13
4.80849e-07	0.445927	0.168	0.131	CTX	RIMKLB	CTX	Macaque	0.0138187	12
2.14913e-08	0.442137	0.3	0.267	CTX	MTPN	CTX	Macaque	0.00816547	12
2.22537e-07	0.403806	0.293	0.261	CTX	NCAN	CTX	Macaque	0.014137	12
2.11821e-07	0.403558	0.158	0.121	CTX	CTTNBP2	CTX	Macaque	0.0134055	12
6.85941e-07	0.399169	0.273	0.242	CTX	GSTM3	CTX	Macaque	0.0114991	12
3.13472e-09	0.429078	0.198	0.153	CTX	MRPL35	CTX	Macaque	0.0149171	11
1.35868e-14	0.46887	0.1	0.052	CTX	ERC2	CTX	Macaque	1.42581e-09	10
1.8903e-10	0.460889	0.244	0.198	CTX	FKBP1A	CTX	Macaque	0.0109742	10
2.79899e-11	0.455342	0.105	0.063	CTX	PPFIA2	CTX	Macaque	0.000291582	10
2.25555e-06	0.437361	0.225	0.195	CTX	TXNDC15	CTX	Macaque	0.0125436	10
1.04887e-06	0.416414	0.14	0.106	CTX	FRMD5	CTX	Macaque	0.00923963	10
1.36778e-13	0.367276	0.109	0.061	CTX	DUSP26	CTX	Macaque	0.00122922	10
1.21945e-66	0.962628	0.1	0.007	CTX	RELN	CTX	Macaque	6.25929e-58	9
1.59919e-10	0.472067	0.101	0.061	CTX	SMARCD3	CTX	Macaque	2.85274e-06	9
8.19222e-07	0.459122	0.162	0.128	CTX	FAM110B	CTX	Macaque	0.0117808	9
2.57929e-07	0.442808	0.333	0.315	CTX	ASH1L	CTX	Macaque	0.0111474	9
3.19011e-07	0.407054	0.285	0.256	CTX	ANAPC11	CTX	Macaque	0.0154324	9
5.46658e-35	0.728758	0.1	0.028	CTX	GABRB2	CTX	Macaque	1.14693e-26	8
1.3763e-06	0.435077	0.22	0.187	CTX	DICER1	CTX	Macaque	0.0199496	8
5.50761e-08	0.42859	0.14	0.102	CTX	HNRNPUL2	CTX	Macaque	0.015456	8
4.3533e-07	0.424254	0.132	0.098	CTX	GPRIN1	CTX	Macaque	0.0126237	8
1.00807e-07	0.418547	0.1	0.067	CTX	SKI	CTX	Macaque	0.00751564	8
1.5805e-06	0.414091	0.103	0.072	CTX	TMEM259	CTX	Macaque	0.0126633	8
1.45135e-06	0.401274	0.102	0.071	CTX	RASSF2	CTX	Macaque	0.0153776	8
2.55879e-06	0.386725	0.122	0.091	CTX	ZNF770	CTX	Macaque	0.0177945	8
8.21717e-13	0.314695	0.557	0.563	CTX	YWHAB	CTX	Macaque	0.00779171	8
1.56525e-18	0.551313	0.103	0.049	CTX	AKAP7	CTX	Macaque	3.36818e-11	7
1.08354e-06	0.442864	0.181	0.147	CTX	CFAP97	CTX	Macaque	0.0163046	7
1.31345e-06	0.396993	0.134	0.101	CTX	BLCAP	CTX	Macaque	0.0218854	7
1.95606e-06	0.393155	0.105	0.075	CTX	ZNF512	CTX	Macaque	0.0234484	7
1.69752e-06	0.376406	0.127	0.094	CTX	SIAH3	CTX	Macaque	0.0180909	7
2.66265e-06	0.365915	0.107	0.076	CTX	HCN1	CTX	Macaque	0.0247682	7
1.15303e-06	0.363734	0.131	0.097	CTX	GGH	CTX	Macaque	0.00657765	7
1.97498e-07	0.498472	0.105	0.073	CTX	ZBTB18	CTX	Macaque	0.0126884	6
2.12812e-06	0.411993	0.161	0.128	CTX	SLC22A17	CTX	Macaque	0.0250885	6
4.22676e-07	0.405325	0.364	0.346	CTX	CUX1	CTX	Macaque	0.0240438	6
3.61253e-07	0.400423	0.38	0.365	CTX	CHD3	CTX	Macaque	0.0111989	6
6.43681e-07	0.38839	0.108	0.076	CTX	TSC22D3	CTX	Macaque	0.0128423	6
1.10259e-07	0.384169	0.116	0.08	CTX	ASTN1	CTX	Macaque	0.0100682	6
4.04816e-09	0.246999	0.642	0.679	CTX	COX4I1	CTX	Macaque	0.0132818	6
1.90579e-35	0.788713	0.101	0.028	CTX	SYT4	CTX	Macaque	5.4481e-32	5
9.68677e-42	0.780661	0.102	0.024	CTX	SYTL5	CTX	Macaque	6.13542e-35	5
5.68434e-09	0.476776	0.263	0.224	CTX	SATB1	CTX	Macaque	0.0119069	5
3.12731e-15	0.47017	0.104	0.054	CTX	RUSC2	CTX	Macaque	5.92335e-08	5
2.41628e-06	0.450627	0.247	0.216	CTX	PHF20L1	CTX	Macaque	0.0126218	5
1.24116e-06	0.446192	0.151	0.117	CTX	NMT1	CTX	Macaque	0.0210348	5
1.6969e-06	0.434297	0.143	0.11	CTX	ANKRD26	CTX	Macaque	0.0095813	5
5.65125e-07	0.407743	0.411	0.407	CTX	KMT2A	CTX	Macaque	0.0174979	5
1.29818e-06	0.406184	0.109	0.078	CTX	SOWAHC	CTX	Macaque	0.0147278	5
1.02734e-06	0.321312	0.131	0.095	CTX	PTP4A1	CTX	Macaque	0.0178837	5
2.76323e-06	0.31237	0.209	0.17	CTX	PCBP1	CTX	Macaque	0.0231252	5
1.82075e-15	0.553345	0.1	0.051	CTX	SLC35F1	CTX	Macaque	6.49381e-12	4
9.33198e-07	0.444203	0.188	0.155	CTX	APLP1	CTX	Macaque	0.0136088	4
8.62047e-07	0.424054	0.259	0.227	CTX	IPO9	CTX	Macaque	0.00686944	4
2.90442e-06	0.422928	0.148	0.116	CTX	LDOC1	CTX	Macaque	0.0274403	4
1.7179e-07	0.411731	0.131	0.096	CTX	DOCK4	CTX	Macaque	0.00354696	4
1.89649e-07	0.410016	0.334	0.308	CTX	ARID4A	CTX	Macaque	0.007829	4
2.82593e-07	0.375866	0.384	0.374	CTX	SEC62	CTX	Macaque	0.0159252	4
7.1276e-07	0.374521	0.106	0.074	CTX	RIMS1	CTX	Macaque	0.0125602	4
7.09096e-25	0.614531	0.101	0.039	CTX	BEND4	CTX	Macaque	6.45499e-20	3
2.98469e-17	0.522123	0.101	0.049	CTX	EPB41L1	CTX	Macaque	1.94234e-12	3
3.09756e-06	0.443004	0.205	0.174	CTX	MAP4	CTX	Macaque	0.0291137	3
1.15698e-06	0.436796	0.181	0.147	CTX	ATP6V0D1	CTX	Macaque	0.00620076	3
2.43394e-06	0.432319	0.128	0.097	CTX	ZFC3H1	CTX	Macaque	0.027318	3
5.19169e-07	0.430304	0.205	0.169	CTX	ANKRD28	CTX	Macaque	0.00668164	3
1.15545e-06	0.429432	0.19	0.157	CTX	PRKAR2B	CTX	Macaque	0.0189079	3
2.09046e-10	0.423797	0.135	0.09	CTX	GNG3	CTX	Macaque	0.0187745	3
3.11515e-07	0.421368	0.254	0.218	CTX	UBE2K	CTX	Macaque	0.0303684	3
9.58577e-07	0.415414	0.325	0.302	CTX	STRBP	CTX	Macaque	0.00851394	3
2.70973e-06	0.410208	0.135	0.103	CTX	KLHL42	CTX	Macaque	0.0232484	3
1.17847e-07	0.388361	0.138	0.1	CTX	DMXL2	CTX	Macaque	0.0209901	3
6.62781e-07	0.381748	0.105	0.073	CTX	GABBR1	CTX	Macaque	0.0131278	3
9.18097e-07	0.380105	0.102	0.071	CTX	KPNA5	CTX	Macaque	0.0076511	3
6.58682e-07	0.376433	0.248	0.213	CTX	HSPE1	CTX	Macaque	0.0168901	3
1.14993e-06	0.369431	0.1	0.069	CTX	SGIP1	CTX	Macaque	0.0138558	3
1.67471e-06	0.361848	0.1	0.069	CTX	CACNB4	CTX	Macaque	0.0231784	3
2.77632e-06	0.356817	0.104	0.074	CTX	SMAP2	CTX	Macaque	0.0193391	3
3.57741e-07	0.355009	0.112	0.079	CTX	POLR2K	CTX	Macaque	0.0261138	3
2.02075e-06	0.350109	0.113	0.081	CTX	THTPA	CTX	Macaque	0.0262032	3
1.63866e-07	0.460884	0.199	0.161	CTX	ZMYND8	CTX	Macaque	0.00123771	2
2.44349e-06	0.45311	0.216	0.186	CTX	ANKRD50	CTX	Macaque	0.0181534	2
1.90386e-06	0.451998	0.231	0.202	CTX	CCP110	CTX	Macaque	0.0171178	2
1.69197e-13	0.439029	0.104	0.058	CTX	CAMKK2	CTX	Macaque	0.00162471	2
3.0984e-06	0.431278	0.188	0.156	CTX	NCOA1	CTX	Macaque	0.0321535	2
5.09087e-08	0.430048	0.102	0.067	CTX	UBE2QL1	CTX	Macaque	0.000744221	2
1.69916e-06	0.424816	0.212	0.179	CTX	CLSTN1	CTX	Macaque	0.02871	2
2.19947e-06	0.42479	0.171	0.137	CTX	KIF5A	CTX	Macaque	0.0230357	2
6.21658e-08	0.405349	0.144	0.105	CTX	TMEM132A	CTX	Macaque	0.0222551	2
1.7049e-07	0.385331	0.1	0.068	CTX	CLPP	CTX	Macaque	0.00832581	2
2.44455e-06	0.356803	0.106	0.075	CTX	EMC6	CTX	Macaque	0.0226864	2
2.45696e-25	0.602695	0.104	0.04	CTX	AKAP5	CTX	Macaque	3.48838e-21	1
6.33715e-22	0.582497	0.1	0.042	CTX	L1CAM	CTX	Macaque	8.99748e-18	1
4.86808e-16	0.527427	0.103	0.052	CTX	SORBS1	CTX	Macaque	6.9117e-12	1
2.40498e-06	0.456482	0.264	0.236	CTX	AP2B1	CTX	Macaque	0.0341459	1
8.62643e-07	0.453365	0.16	0.126	CTX	ATP6AP2	CTX	Macaque	0.0122478	1
2.76112e-10	0.449709	0.1	0.061	CTX	JAZF1	CTX	Macaque	3.92024e-06	1
1.38499e-06	0.434894	0.225	0.192	CTX	TRIM44	CTX	Macaque	0.0196641	1
2.74807e-06	0.433954	0.141	0.11	CTX	RNPC3	CTX	Macaque	0.039017	1
1.54344e-06	0.433052	0.201	0.168	CTX	MAPK8	CTX	Macaque	0.0219138	1
3.41662e-06	0.425619	0.153	0.121	CTX	TSPAN5	CTX	Macaque	0.0485092	1
1.1606e-06	0.425508	0.246	0.217	CTX	CCT7	CTX	Macaque	0.0164783	1
1.55434e-07	0.419126	0.258	0.222	CTX	CISD1	CTX	Macaque	0.00220685	1
2.82652e-07	0.41744	0.201	0.164	CTX	WDR47	CTX	Macaque	0.00401309	1
5.85819e-07	0.415807	0.152	0.117	CTX	EHBP1	CTX	Macaque	0.00831746	1
1.25827e-06	0.4134	0.112	0.081	CTX	SMARCA1	CTX	Macaque	0.0178649	1
1.14876e-06	0.412226	0.132	0.099	CTX	BCL2L1	CTX	Macaque	0.0163101	1
3.40598e-06	0.411895	0.104	0.075	CTX	FIGN	CTX	Macaque	0.0483581	1
1.27793e-06	0.407479	0.122	0.09	CTX	ERI3	CTX	Macaque	0.0181441	1
6.83617e-07	0.405694	0.141	0.107	CTX	FTO	CTX	Macaque	0.00970599	1
3.23005e-06	0.395031	0.343	0.326	CTX	PPIG	CTX	Macaque	0.0458603	1
1.23285e-06	0.392093	0.105	0.074	CTX	VTI1B	CTX	Macaque	0.017504	1
2.77436e-06	0.389055	0.145	0.113	CTX	NME3	CTX	Macaque	0.0393904	1
3.49785e-06	0.373492	0.118	0.087	CTX	CDK11B	CTX	Macaque	0.0496624	1
1.66633e-06	0.373093	0.365	0.351	CTX	MGST3	CTX	Macaque	0.0236585	1
7.12537e-07	0.366497	0.106	0.074	CTX	MKKS	CTX	Macaque	0.0101166	1
1.13917e-06	0.356555	0.27	0.236	CTX	GAD1	CTX	Macaque	0.016174	1
1.39007e-06	0.350905	0.184	0.147	CTX	SYT5	CTX	Macaque	0.0197362	1
9.59794e-07	0.303965	0.469	0.478	CTX	SERBP1	CTX	Macaque	0.0136272	1
1.1198e-08	0.232253	0.733	0.787	CTX	EIF4G2	CTX	Macaque	0.00015899	1
1.57952e-88	2.65311	0.161	0.023	MGE	CRABP1	CTX	Macaque	4.27104e-71	100
1.68302e-289	2.26533	0.41	0.044	MGE	TMEM123	CTX	Macaque	5.67032e-272	100
8.1952e-267	2.25225	0.669	0.335	MGE	EEF1A1	CTX	Macaque	1.53229e-249	100
2.8459e-221	2.16616	0.446	0.119	MGE	SLC25A6	CTX	Macaque	4.78377e-198	100
1.69439e-258	1.74881	0.354	0.027	MGE	NKX2-1	CTX	Macaque	1.76972e-236	100
2.8e-161	1.573	0.353	0.081	MGE	PCDH17	CTX	Macaque	1.65542e-149	100
6.8361e-196	1.52202	0.379	0.079	MGE	COX7C	CTX	Macaque	5.32749e-150	100
5.92784e-275	1.50557	0.667	0.248	MGE	RND3	CTX	Macaque	1.21156e-250	100
0	1.43985	0.775	0.329	MGE	RBP1	CTX	Macaque	1.95674e-278	100
8.65664e-128	1.41805	0.236	0.036	MGE	ETV1	CTX	Macaque	1.05087e-108	100
2.10236e-45	1.37211	0.12	0.031	MGE	ANGPT2	CTX	Macaque	2.29366e-38	100
9.24776e-81	1.35723	0.184	0.039	MGE	HMGB2	CTX	Macaque	3.28785e-56	100
8.10484e-167	1.32912	0.259	0.025	MGE	CDK6	CTX	Macaque	1.69644e-140	100
1.46371e-72	1.3282	0.282	0.109	MGE	JUN	CTX	Macaque	4.69858e-57	100
2.1739e-138	1.30797	0.372	0.112	MGE	CCND2	CTX	Macaque	6.04335e-118	100
7.03771e-131	1.3051	0.356	0.106	MGE	MDK	CTX	Macaque	4.47244e-116	100
1.67231e-168	1.23769	0.497	0.181	MGE	ATP6V1G1	CTX	Macaque	7.09671e-125	100
7.26798e-131	1.20814	0.319	0.081	MGE	PLXNA4	CTX	Macaque	5.66281e-112	100
1.08979e-139	1.18307	0.232	0.028	MGE	CD99	CTX	Macaque	6.69154e-118	100
1.08447e-132	1.17668	0.282	0.056	MGE	MEST	CTX	Macaque	2.72429e-122	100
2.19213e-118	1.17255	0.258	0.053	MGE	INSM1	CTX	Macaque	4.0189e-114	100
4.77979e-124	1.1468	0.321	0.09	MGE	SLC38A2	CTX	Macaque	1.97952e-87	100
5.89782e-157	1.14258	0.407	0.113	MGE	CHD7	CTX	Macaque	5.11265e-131	100
1.34286e-110	1.13672	0.229	0.043	MGE	EFNA5	CTX	Macaque	3.15746e-80	100
2.28531e-122	1.12093	0.254	0.048	MGE	POU3F4	CTX	Macaque	1.11229e-95	100
1.12557e-127	1.10425	0.374	0.12	MGE	CHCHD2	CTX	Macaque	1.10105e-100	100
7.5077e-126	1.10026	0.395	0.132	MGE	DLX6	CTX	Macaque	1.57636e-117	100
1.83391e-72	1.04866	0.258	0.091	MGE	NFIA	CTX	Macaque	5.86363e-59	100
5.40152e-137	1.0463	0.623	0.323	MGE	DCLK2	CTX	Macaque	3.8812e-104	100
4.35123e-136	1.04213	0.752	0.521	MGE	TPT1	CTX	Macaque	4.76236e-119	100
2.5155e-77	1.03335	0.38	0.174	MGE	JUND	CTX	Macaque	1.90287e-59	100
2.74302e-120	1.02275	0.163	0.006	MGE	BACE2	CTX	Macaque	8.17507e-103	100
2.46146e-90	1.02212	0.133	0.008	MGE	PTTG1	CTX	Macaque	9.12801e-72	100
7.71371e-96	0.97498	0.254	0.067	MGE	RAMP1	CTX	Macaque	3.46415e-69	100
7.98005e-114	0.962011	0.443	0.181	MGE	HTATSF1	CTX	Macaque	1.64867e-87	100
7.9822e-114	0.950599	0.348	0.11	MGE	GLCCI1	CTX	Macaque	1.34487e-85	100
2.34765e-73	0.950335	0.179	0.041	MGE	TLE1	CTX	Macaque	2.11984e-54	100
2.87931e-101	0.943961	0.357	0.126	MGE	MSI2	CTX	Macaque	1.77251e-92	100
1.01455e-44	0.942832	0.206	0.086	MGE	PEG10	CTX	Macaque	1.99564e-40	100
1.10051e-100	0.941983	0.26	0.068	MGE	TIMM8B	CTX	Macaque	6.58995e-79	100
4.10229e-81	0.941021	0.129	0.012	MGE	ITGB8	CTX	Macaque	1.57876e-63	100
1.3572e-111	0.91138	0.34	0.107	MGE	MYO1B	CTX	Macaque	5.96727e-76	100
4.55969e-78	0.910558	0.538	0.333	MGE	BCL11A	CTX	Macaque	3.64832e-57	100
2.6251e-61	0.890493	0.1	0.01	MGE	ST18	CTX	Macaque	2.74142e-56	100
8.971e-98	0.878664	0.257	0.066	MGE	TMEM47	CTX	Macaque	7.14297e-71	100
4.6934e-58	0.860374	0.369	0.193	MGE	HMGN2	CTX	Macaque	2.95412e-34	100
9.39195e-38	0.856565	0.122	0.037	MGE	CENPF	CTX	Macaque	1.00621e-21	100
2.83276e-91	0.856169	0.245	0.065	MGE	PPIA	CTX	Macaque	3.2748e-72	100
1.31781e-15	0.853918	0.169	0.102	MGE	DNAJB1	CTX	Macaque	1.11827e-08	100
6.26238e-86	0.842876	0.185	0.035	MGE	EPHA4	CTX	Macaque	2.06948e-63	100
9.29298e-96	0.839593	0.278	0.08	MGE	TCF3	CTX	Macaque	6.61363e-68	100
1.09075e-90	0.837437	0.239	0.062	MGE	TIAM1	CTX	Macaque	5.37103e-68	100
9.32787e-99	0.835639	0.362	0.132	MGE	SUMO1	CTX	Macaque	1.23842e-82	100
1.13242e-92	0.814523	0.612	0.342	MGE	NFIB	CTX	Macaque	4.21917e-76	100
2.30401e-216	0.801809	0.995	0.975	MGE	SOX4	CTX	Macaque	1.25048e-178	100
1.74454e-111	0.799438	0.593	0.3	MGE	PNRC1	CTX	Macaque	5.33401e-88	100
9.73767e-80	0.799346	0.228	0.064	MGE	RAP2B	CTX	Macaque	1.23521e-54	100
2.33207e-93	0.794174	0.664	0.425	MGE	GAD2	CTX	Macaque	6.08406e-73	100
7.79766e-126	0.792705	0.647	0.337	MGE	DLX2	CTX	Macaque	1.63559e-96	100
1.85458e-67	0.784787	0.199	0.057	MGE	MBIP	CTX	Macaque	1.54748e-53	100
4.78888e-102	0.773904	0.593	0.307	MGE	SP9	CTX	Macaque	5.8177e-83	100
1.52185e-86	0.771504	0.63	0.39	MGE	SH3BGRL3	CTX	Macaque	1.47408e-60	100
1.03466e-141	0.770159	0.86	0.678	MGE	HNRNPDL	CTX	Macaque	1.81869e-104	100
4.11371e-101	0.76975	0.337	0.114	MGE	ELF2	CTX	Macaque	4.03415e-65	100
2.63563e-82	0.760107	0.353	0.14	MGE	POU3F2	CTX	Macaque	4.39722e-60	100
2.62337e-92	0.759842	0.451	0.204	MGE	NPM1	CTX	Macaque	3.22004e-73	100
1.26566e-59	0.756545	0.127	0.023	MGE	POU3F1	CTX	Macaque	7.96072e-40	100
1.67623e-71	0.755844	0.368	0.166	MGE	IGFBPL1	CTX	Macaque	4.15937e-53	100
2.77896e-82	0.752412	0.328	0.124	MGE	CDK2AP1	CTX	Macaque	4.00698e-64	100
7.76209e-39	0.749904	0.575	0.429	MGE	USP22	CTX	Macaque	1.44437e-24	100
2.84395e-72	0.748825	0.539	0.313	MGE	ELAVL3	CTX	Macaque	4.68718e-57	100
1.70133e-57	0.747519	0.297	0.131	MGE	HES6	CTX	Macaque	2.90741e-49	100
2.73967e-72	0.745317	0.155	0.029	MGE	SOX9	CTX	Macaque	2.54982e-58	100
2.94426e-111	0.743357	0.803	0.568	MGE	FTL	CTX	Macaque	1.09752e-89	100
5.90386e-71	0.74137	0.304	0.121	MGE	VCAN	CTX	Macaque	1.09598e-45	100
7.41499e-84	0.737857	0.193	0.04	MGE	EZR	CTX	Macaque	1.7856e-60	100
7.35672e-51	0.722157	0.163	0.05	MGE	SMC4	CTX	Macaque	1.14761e-34	100
8.14494e-135	0.714453	0.982	0.943	MGE	ACTG1	CTX	Macaque	1.33994e-113	100
8.66736e-83	0.713611	0.46	0.22	MGE	DNAJB6	CTX	Macaque	5.85524e-63	100
5.95366e-84	0.710675	0.494	0.246	MGE	DLX5	CTX	Macaque	2.25391e-58	100
1.18617e-77	0.707914	0.301	0.109	MGE	SOX5	CTX	Macaque	1.32618e-49	100
2.01425e-79	0.707698	0.563	0.318	MGE	SYNE2	CTX	Macaque	1.54739e-66	100
3.29044e-72	0.692978	0.132	0.018	MGE	PHLPP1	CTX	Macaque	4.53604e-52	100
5.10829e-71	0.690452	0.329	0.135	MGE	PEBP1	CTX	Macaque	2.42491e-54	100
5.71261e-61	0.680671	0.19	0.056	MGE	CDCA7	CTX	Macaque	1.45912e-47	100
6.28867e-83	0.680172	0.363	0.147	MGE	TPM4	CTX	Macaque	2.05697e-56	100
5.74642e-67	0.678433	0.201	0.058	MGE	BAZ1A	CTX	Macaque	1.75698e-50	100
1.4806e-112	0.674137	0.814	0.564	MGE	PFN2	CTX	Macaque	9.43367e-88	100
2.85964e-84	0.662246	0.394	0.169	MGE	NOVA1	CTX	Macaque	7.72016e-53	100
4.37462e-65	0.652059	0.527	0.306	MGE	SOX6	CTX	Macaque	8.49656e-44	100
4.00338e-65	0.645876	0.121	0.016	MGE	PDLIM7	CTX	Macaque	2.33785e-47	100
1.92847e-65	0.644327	0.216	0.068	MGE	PTTG1IP	CTX	Macaque	1.92753e-46	100
6.1822e-46	0.642162	0.762	0.621	MGE	HMGB1	CTX	Macaque	4.97689e-33	100
2.54636e-59	0.639197	0.317	0.144	MGE	ROBO1	CTX	Macaque	1.515e-42	100
8.21723e-64	0.635458	0.342	0.154	MGE	MAP1LC3B	CTX	Macaque	1.32352e-45	100
6.36987e-67	0.629832	0.42	0.213	MGE	SYT11	CTX	Macaque	7.15701e-39	100
6.91754e-96	0.62818	0.652	0.359	MGE	IFI27L2	CTX	Macaque	3.95429e-64	100
1.23018e-84	0.627696	0.663	0.405	MGE	HNRNPA0	CTX	Macaque	4.12075e-74	100
4.82125e-91	0.625785	0.751	0.506	MGE	BCL11B	CTX	Macaque	2.97656e-61	100
2.98863e-68	0.62489	0.289	0.112	MGE	SP3	CTX	Macaque	4.01935e-48	100
8.2174e-56	0.621215	0.341	0.164	MGE	OLA1	CTX	Macaque	3.73245e-42	100
1.49367e-44	0.617662	0.214	0.089	MGE	CBLB	CTX	Macaque	1.43984e-29	100
1.77865e-47	0.614635	0.145	0.041	MGE	DACH2	CTX	Macaque	7.10244e-37	100
1.03967e-112	0.612682	0.966	0.899	MGE	SOX11	CTX	Macaque	1.10599e-94	100
1.9187e-53	0.609867	0.338	0.164	MGE	PLXNA2	CTX	Macaque	2.1248e-41	100
5.4166e-63	0.60707	0.146	0.03	MGE	FUNDC2	CTX	Macaque	2.12594e-45	100
5.22033e-57	0.605506	0.129	0.025	MGE	LITAF	CTX	Macaque	4.46633e-45	100
1.47345e-58	0.602277	0.283	0.118	MGE	CDV3	CTX	Macaque	1.80134e-35	100
4.15313e-64	0.596689	0.295	0.118	MGE	GSE1	CTX	Macaque	4.4522e-45	100
3.52817e-63	0.595875	0.141	0.027	MGE	ZEB1	CTX	Macaque	7.38148e-36	100
6.44632e-49	0.59465	0.173	0.057	MGE	CST3	CTX	Macaque	9.91871e-31	100
1.6423e-54	0.591824	0.534	0.32	MGE	TBL1XR1	CTX	Macaque	2.05717e-44	100
2.48188e-44	0.590882	0.153	0.05	MGE	HPS3	CTX	Macaque	6.15168e-32	100
1.41339e-46	0.588956	0.717	0.549	MGE	SFPQ	CTX	Macaque	4.8477e-38	100
1.61353e-59	0.581145	0.388	0.192	MGE	SMARCC1	CTX	Macaque	1.78117e-44	100
1.12514e-28	0.576721	0.12	0.045	MGE	EDIL3	CTX	Macaque	1.15952e-24	100
3.20813e-54	0.576403	0.306	0.139	MGE	MPPED2	CTX	Macaque	1.82466e-43	100
2.43086e-64	0.568662	0.302	0.123	MGE	PRTFDC1	CTX	Macaque	1.18872e-45	100
1.27953e-38	0.568208	0.238	0.113	MGE	LGI1	CTX	Macaque	7.02776e-26	100
2.16159e-51	0.565685	0.371	0.191	MGE	BAZ2B	CTX	Macaque	5.09512e-40	100
7.70838e-59	0.564292	0.282	0.115	MGE	WTAP	CTX	Macaque	1.39566e-43	100
4.74916e-58	0.563247	0.158	0.04	MGE	ARL6IP6	CTX	Macaque	1.98769e-40	100
3.73386e-54	0.562474	0.26	0.108	MGE	CORO1C	CTX	Macaque	3.54383e-38	100
9.01964e-38	0.560471	0.159	0.06	MGE	TLE4	CTX	Macaque	2.18284e-28	100
4.59079e-49	0.555416	0.287	0.133	MGE	YTHDF2	CTX	Macaque	4.73004e-34	100
6.47859e-136	0.553873	0.973	0.889	MGE	MARCKS	CTX	Macaque	1.64102e-105	100
3.36527e-31	0.552788	0.397	0.251	MGE	HSPA5	CTX	Macaque	9.44792e-17	100
6.01543e-45	0.550642	0.169	0.058	MGE	RND2	CTX	Macaque	3.81463e-28	100
9.44505e-145	0.54954	0.995	0.987	MGE	TMSB10	CTX	Macaque	2.03329e-132	100
4.75916e-45	0.549181	0.223	0.093	MGE	ITGB1	CTX	Macaque	1.7459e-34	100
1.02029e-41	0.548886	0.389	0.224	MGE	ZNF536	CTX	Macaque	3.38338e-32	100
3.49088e-59	0.548185	0.4	0.197	MGE	LAPTM4A	CTX	Macaque	2.09647e-45	100
8.89936e-75	0.547735	0.575	0.319	MGE	MYL6	CTX	Macaque	2.70221e-44	100
2.58838e-65	0.545118	0.583	0.345	MGE	COMMD6	CTX	Macaque	6.73652e-48	100
5.43306e-49	0.532961	0.291	0.136	MGE	CITED2	CTX	Macaque	7.71042e-33	100
8.9501e-76	0.531555	0.651	0.386	MGE	SERF2	CTX	Macaque	1.12351e-46	100
5.82032e-56	0.529135	0.519	0.302	MGE	EIF3F	CTX	Macaque	2.41477e-44	100
7.90676e-42	0.528666	0.155	0.053	MGE	KLHL13	CTX	Macaque	2.41657e-28	100
3.4625e-48	0.528142	0.333	0.165	MGE	WSB1	CTX	Macaque	1.87326e-35	100
1.47286e-54	0.521591	0.121	0.023	MGE	PBX3	CTX	Macaque	4.26167e-31	100
1.72781e-68	0.519107	0.809	0.613	MGE	HNRNPK	CTX	Macaque	1.40993e-55	100
1.40678e-61	0.517124	0.477	0.258	MGE	CNN3	CTX	Macaque	3.86066e-42	100
2.57422e-42	0.516373	0.183	0.071	MGE	LBH	CTX	Macaque	2.06815e-26	100
3.27649e-60	0.513227	0.325	0.143	MGE	DHRS7	CTX	Macaque	2.99457e-34	100
1.01611e-45	0.512055	0.176	0.061	MGE	NKAIN4	CTX	Macaque	4.00047e-31	100
7.07489e-42	0.505373	0.299	0.15	MGE	SQLE	CTX	Macaque	1.60994e-27	100
1.08315e-33	0.503585	0.15	0.059	MGE	KLF6	CTX	Macaque	2.60871e-19	100
1.89549e-55	0.503278	0.282	0.121	MGE	CPLX2	CTX	Macaque	8.83657e-32	100
1.32455e-46	0.502324	0.146	0.042	MGE	SERPINB6	CTX	Macaque	7.06411e-35	100
1.11789e-45	0.499413	0.329	0.166	MGE	EIF4B	CTX	Macaque	2.53366e-34	100
1.18203e-72	0.497221	0.45	0.22	MGE	VEZF1	CTX	Macaque	1.17156e-36	100
1.94479e-12	0.497161	0.143	0.087	MGE	HSPA1A	CTX	Macaque	8.80655e-06	100
5.60174e-18	0.496667	0.925	0.85	MGE	HSP90AA1	CTX	Macaque	5.18662e-07	100
1.97942e-58	0.493033	0.502	0.282	MGE	TMA7	CTX	Macaque	2.32119e-36	100
2.90419e-46	0.48731	0.13	0.034	MGE	RNASEH2B	CTX	Macaque	1.27207e-26	100
1.26232e-40	0.48556	0.205	0.087	MGE	KCNQ2	CTX	Macaque	2.49223e-28	100
1.02368e-62	0.485078	0.665	0.443	MGE	KHDRBS1	CTX	Macaque	8.93472e-36	100
9.32989e-39	0.484875	0.345	0.193	MGE	TMPO	CTX	Macaque	9.92707e-23	100
8.6445e-74	0.484462	0.787	0.59	MGE	SUMO2	CTX	Macaque	3.41531e-37	100
5.5969e-32	0.484125	0.17	0.075	MGE	TFDP2	CTX	Macaque	1.46324e-19	100
4.97226e-31	0.483306	0.123	0.045	MGE	PROX1	CTX	Macaque	7.33526e-17	100
1.08866e-43	0.482455	0.445	0.265	MGE	PPP1CB	CTX	Macaque	1.12265e-28	100
7.62104e-51	0.482327	0.35	0.174	MGE	CLIC4	CTX	Macaque	7.55572e-33	100
1.70325e-32	0.478218	0.179	0.08	MGE	RPA3	CTX	Macaque	1.38344e-16	100
3.58087e-35	0.478196	0.127	0.042	MGE	SHB	CTX	Macaque	1.15489e-27	100
5.43034e-35	0.476275	0.127	0.043	MGE	SEC22B	CTX	Macaque	3.22063e-25	100
6.80363e-44	0.472822	0.25	0.112	MGE	MCL1	CTX	Macaque	4.1288e-29	100
4.22017e-39	0.471682	0.154	0.055	MGE	CMTM6	CTX	Macaque	7.35574e-29	100
1.09435e-46	0.470117	0.252	0.111	MGE	RC3H1	CTX	Macaque	2.29498e-23	100
7.34421e-44	0.466316	0.71	0.521	MGE	CCDC88A	CTX	Macaque	2.36618e-29	100
1.74403e-43	0.462931	0.337	0.175	MGE	RCN2	CTX	Macaque	1.1405e-31	100
6.50323e-47	0.460329	0.312	0.151	MGE	CARHSP1	CTX	Macaque	8.17816e-31	100
8.79895e-35	0.456814	0.161	0.064	MGE	CAPG	CTX	Macaque	2.06225e-22	100
3.18085e-61	0.455754	0.74	0.518	MGE	FTH1	CTX	Macaque	1.00724e-39	100
1.65863e-42	0.451513	0.385	0.213	MGE	SMARCD1	CTX	Macaque	7.64917e-28	100
7.02542e-31	0.451046	0.339	0.201	MGE	ARL4D	CTX	Macaque	2.57895e-22	100
2.62284e-48	0.450636	0.251	0.106	MGE	SH3BGRL	CTX	Macaque	6.89704e-28	100
3.23302e-35	0.450414	0.641	0.459	MGE	SNRPN	CTX	Macaque	4.39225e-21	100
1.14298e-49	0.449981	0.327	0.157	MGE	SYF2	CTX	Macaque	5.17006e-30	100
5.94874e-38	0.449578	0.407	0.235	MGE	NEDD4L	CTX	Macaque	6.67535e-29	100
1.09953e-27	0.445799	0.167	0.079	MGE	ST8SIA4	CTX	Macaque	6.74263e-15	100
4.02895e-39	0.4454	0.186	0.075	MGE	GABPB1	CTX	Macaque	2.56802e-22	100
2.33386e-35	0.445137	0.118	0.036	MGE	TRIB2	CTX	Macaque	3.09179e-23	100
1.18217e-35	0.44485	0.352	0.197	MGE	ZNF207	CTX	Macaque	3.14974e-26	100
1.24601e-46	0.444092	0.114	0.025	MGE	SNRPC	CTX	Macaque	6.9343e-30	100
3.0548e-32	0.442474	0.14	0.054	MGE	TOX	CTX	Macaque	2.79839e-21	100
1.36447e-41	0.442364	0.188	0.073	MGE	TEAD1	CTX	Macaque	1.58898e-21	100
4.16462e-44	0.442048	0.155	0.05	MGE	ZSWIM5	CTX	Macaque	9.70008e-24	100
8.14802e-25	0.440144	0.221	0.121	MGE	SCHIP1	CTX	Macaque	6.82025e-16	100
4.68604e-33	0.439649	0.159	0.065	MGE	ARL4A	CTX	Macaque	8.66317e-21	100
4.0551e-37	0.436323	0.187	0.078	MGE	AK3	CTX	Macaque	1.04261e-25	100
3.43185e-38	0.43311	0.175	0.069	MGE	TMEM98	CTX	Macaque	3.07838e-28	100
2.52127e-39	0.432028	0.133	0.041	MGE	TP53BP2	CTX	Macaque	1.15756e-18	100
5.13444e-44	0.428844	0.196	0.075	MGE	NES	CTX	Macaque	3.55634e-24	100
5.5895e-41	0.427653	0.167	0.06	MGE	ATP6V0E1	CTX	Macaque	7.15408e-22	100
4.0345e-38	0.425129	0.183	0.074	MGE	COX7A2L	CTX	Macaque	6.08182e-26	100
1.36809e-33	0.424923	0.171	0.071	MGE	FDFT1	CTX	Macaque	3.20974e-25	100
1.05058e-49	0.42485	0.547	0.336	MGE	SRSF3	CTX	Macaque	7.00068e-31	100
4.42584e-31	0.420759	0.234	0.119	MGE	RBM18	CTX	Macaque	1.4555e-23	100
2.08321e-39	0.420683	0.405	0.234	MGE	GNAI2	CTX	Macaque	4.92847e-23	100
1.09725e-20	0.418011	0.159	0.083	MGE	IER2	CTX	Macaque	6.14629e-11	100
2.75061e-49	0.417632	0.159	0.048	MGE	MPC1	CTX	Macaque	6.95486e-25	100
1.28757e-52	0.41644	0.474	0.267	MGE	FSCN1	CTX	Macaque	1.23458e-25	100
1.37627e-28	0.413877	0.127	0.049	MGE	PARD3	CTX	Macaque	3.69946e-22	100
8.41406e-38	0.413321	0.115	0.033	MGE	KITLG	CTX	Macaque	1.3828e-16	100
2.99361e-55	0.410367	0.456	0.241	MGE	SAP18	CTX	Macaque	6.85722e-30	100
3.59569e-44	0.409228	0.409	0.233	MGE	CBX3	CTX	Macaque	2.92757e-24	100
9.1531e-30	0.408122	0.247	0.131	MGE	GADD45G	CTX	Macaque	1.53359e-19	100
1.55557e-15	0.40615	0.229	0.145	MGE	NFIX	CTX	Macaque	2.61427e-08	100
6.73341e-37	0.404758	0.276	0.142	MGE	BNIP3L	CTX	Macaque	3.25054e-21	100
1.84957e-56	0.401888	0.88	0.728	MGE	MARCKSL1	CTX	Macaque	3.8611e-40	100
1.94903e-35	0.400821	0.221	0.103	MGE	IRS2	CTX	Macaque	6.3516e-20	100
8.98298e-40	0.397417	0.193	0.079	MGE	ALDH7A1	CTX	Macaque	5.0905e-21	100
9.41025e-31	0.396569	0.274	0.149	MGE	TSC22D2	CTX	Macaque	2.73922e-21	100
2.30852e-26	0.3945	0.134	0.056	MGE	GOLIM4	CTX	Macaque	4.61488e-17	100
1.76085e-36	0.392713	0.309	0.164	MGE	SLC38A1	CTX	Macaque	1.19716e-21	100
2.09276e-35	0.391474	0.62	0.417	MGE	HNRNPA1	CTX	Macaque	7.09461e-23	100
2.18087e-36	0.391451	0.672	0.489	MGE	NNAT	CTX	Macaque	1.61303e-20	100
5.85833e-41	0.390633	0.376	0.207	MGE	FOXN3	CTX	Macaque	1.46707e-21	100
1.68451e-29	0.388156	0.192	0.092	MGE	FZD3	CTX	Macaque	4.5232e-16	100
1.83847e-40	0.38806	0.17	0.064	MGE	MGRN1	CTX	Macaque	1.84904e-20	100
7.51261e-32	0.387246	0.186	0.085	MGE	ANP32E	CTX	Macaque	2.43127e-16	100
1.04189e-29	0.38525	0.19	0.091	MGE	EML6	CTX	Macaque	1.71641e-15	100
2.441e-49	0.385199	0.192	0.067	MGE	UQCRC2	CTX	Macaque	9.08832e-23	100
1.06109e-33	0.384893	0.221	0.106	MGE	EZH2	CTX	Macaque	6.34929e-17	100
2.64728e-33	0.384791	0.245	0.123	MGE	GLUL	CTX	Macaque	5.49261e-22	100
1.23455e-40	0.384697	0.532	0.34	MGE	CIRBP	CTX	Macaque	1.82009e-23	100
9.96343e-30	0.384179	0.154	0.065	MGE	FLNA	CTX	Macaque	7.1675e-19	100
6.00142e-40	0.384035	0.538	0.339	MGE	MEX3A	CTX	Macaque	7.26601e-23	100
2.06662e-24	0.383146	0.125	0.053	MGE	RBM15B	CTX	Macaque	1.66185e-18	100
1.20215e-29	0.382588	0.301	0.169	MGE	NAP1L1	CTX	Macaque	2.58736e-20	100
1.35337e-30	0.38226	0.144	0.058	MGE	MED30	CTX	Macaque	8.9913e-24	100
1.6636e-47	0.381642	0.328	0.16	MGE	SRSF6	CTX	Macaque	1.07393e-24	100
1.88724e-49	0.376503	0.279	0.126	MGE	CTNNB1	CTX	Macaque	1.02886e-22	100
2.91681e-53	0.374547	0.636	0.409	MGE	NDUFS5	CTX	Macaque	5.48032e-29	100
8.03863e-39	0.374148	0.452	0.271	MGE	METTL9	CTX	Macaque	1.69997e-25	100
3.77963e-38	0.374015	0.626	0.444	MGE	DLX1	CTX	Macaque	1.73682e-16	100
7.30722e-35	0.372143	0.527	0.345	MGE	SRRM4	CTX	Macaque	7.60791e-22	100
1.73226e-33	0.370869	0.517	0.328	MGE	UBE2I	CTX	Macaque	8.01928e-26	100
5.60308e-30	0.370698	0.274	0.148	MGE	RHOA	CTX	Macaque	1.19514e-22	100
3.30428e-37	0.369649	0.439	0.265	MGE	RBM3	CTX	Macaque	5.55865e-22	100
5.21261e-44	0.369611	0.628	0.408	MGE	COX7A2	CTX	Macaque	1.36256e-26	100
7.60192e-50	0.369208	0.959	0.912	MGE	MAP1B	CTX	Macaque	3.25919e-32	100
6.12778e-27	0.368864	0.138	0.058	MGE	RRP36	CTX	Macaque	2.22707e-18	100
1.02949e-33	0.368828	0.234	0.115	MGE	CTBP2	CTX	Macaque	2.01314e-20	100
9.88819e-32	0.367037	0.121	0.042	MGE	EFS	CTX	Macaque	2.32235e-18	100
4.91271e-31	0.363168	0.143	0.056	MGE	PSD3	CTX	Macaque	2.4217e-17	100
2.29074e-33	0.360931	0.157	0.062	MGE	ZNF219	CTX	Macaque	1.08631e-19	100
2.35655e-34	0.359604	0.642	0.45	MGE	HNRNPH1	CTX	Macaque	3.35458e-22	100
5.17061e-33	0.359508	0.503	0.331	MGE	HNRNPC	CTX	Macaque	1.08016e-21	100
3.14882e-29	0.359211	0.191	0.091	MGE	ZKSCAN1	CTX	Macaque	8.36957e-14	100
1.21199e-35	0.358747	0.229	0.109	MGE	ASAP1	CTX	Macaque	4.50147e-16	100
2.64624e-39	0.357719	0.308	0.159	MGE	NSA2	CTX	Macaque	1.50078e-20	100
8.10687e-34	0.357497	0.194	0.086	MGE	GNG4	CTX	Macaque	3.4259e-18	100
8.55983e-23	0.357204	0.164	0.082	MGE	MAP1A	CTX	Macaque	1.91729e-15	100
1.85038e-30	0.356283	0.114	0.039	MGE	ACTL6A	CTX	Macaque	1.91774e-19	100
3.08964e-30	0.355675	0.245	0.129	MGE	KLHL24	CTX	Macaque	5.48603e-17	100
3.70733e-32	0.354607	0.26	0.135	MGE	NDUFV3	CTX	Macaque	4.38334e-19	100
2.17613e-29	0.352973	0.163	0.072	MGE	LSM12	CTX	Macaque	5.5191e-15	100
7.62626e-37	0.352872	0.138	0.048	MGE	ABAT	CTX	Macaque	3.52321e-15	100
5.5593e-32	0.349163	0.298	0.164	MGE	DPYSL4	CTX	Macaque	1.16892e-17	100
5.36977e-25	0.349044	0.336	0.207	MGE	KDM6B	CTX	Macaque	1.94694e-17	100
2.10703e-37	0.344649	0.31	0.159	MGE	NDUFB8	CTX	Macaque	9.98562e-22	100
8.09409e-27	0.342756	0.182	0.089	MGE	ZNF362	CTX	Macaque	6.35324e-14	100
1.51078e-27	0.339441	0.361	0.217	MGE	CYTH2	CTX	Macaque	2.46721e-20	100
1.73904e-37	0.336515	0.207	0.089	MGE	SDCBP	CTX	Macaque	1.26602e-21	100
5.79741e-37	0.331695	0.131	0.043	MGE	LDHB	CTX	Macaque	3.36858e-18	100
1.10031e-28	0.318309	0.512	0.343	MGE	APEX1	CTX	Macaque	8.51011e-18	100
9.97435e-32	0.317575	0.458	0.284	MGE	EIF3H	CTX	Macaque	1.2241e-21	100
2.46585e-27	0.317077	0.447	0.286	MGE	DDAH2	CTX	Macaque	1.58774e-18	100
2.60629e-32	0.316191	0.269	0.141	MGE	UBE2L3	CTX	Macaque	2.94009e-17	100
7.64695e-44	0.315314	0.897	0.766	MGE	EIF1	CTX	Macaque	4.89997e-26	100
3.4428e-36	0.309416	0.7	0.501	MGE	HDAC2	CTX	Macaque	2.32114e-21	100
9.85466e-51	0.303036	0.971	0.909	MGE	TUBB	CTX	Macaque	1.29136e-31	100
6.40813e-37	0.526421	0.111	0.032	MGE	S100A10	CTX	Macaque	1.95415e-26	99
1.43317e-30	0.361169	0.192	0.089	MGE	MIEN1	CTX	Macaque	3.21814e-15	99
9.72912e-33	0.36088	0.214	0.102	MGE	USP16	CTX	Macaque	8.12442e-18	99
1.53871e-28	0.352376	0.214	0.109	MGE	TOX3	CTX	Macaque	2.33518e-16	99
2.73954e-28	0.352273	0.151	0.065	MGE	LEPROTL1	CTX	Macaque	6.36863e-19	99
3.31578e-21	0.351514	0.12	0.054	MGE	IGDCC3	CTX	Macaque	3.4074e-11	99
5.99061e-35	0.350208	0.567	0.368	MGE	TMSB15A	CTX	Macaque	6.0681e-26	99
1.37362e-21	0.343243	0.172	0.089	MGE	ARHGEF2	CTX	Macaque	3.43057e-15	99
8.05648e-30	0.337974	0.294	0.163	MGE	KANSL1	CTX	Macaque	2.7159e-18	99
3.35736e-22	0.337405	0.207	0.114	MGE	ENOX1	CTX	Macaque	2.44285e-16	99
1.44303e-29	0.336553	0.153	0.065	MGE	HSPA13	CTX	Macaque	2.98855e-17	99
7.65288e-21	0.336097	0.233	0.135	MGE	TRIM24	CTX	Macaque	2.34253e-13	99
7.76978e-28	0.333701	0.295	0.169	MGE	SYNCRIP	CTX	Macaque	1.46646e-20	99
2.07202e-18	0.331706	0.144	0.076	MGE	MSI1	CTX	Macaque	1.15027e-12	99
3.98211e-20	0.330227	0.168	0.09	MGE	DBI	CTX	Macaque	7.49196e-12	99
3.32969e-43	0.330124	0.572	0.363	MGE	SLIRP	CTX	Macaque	8.27377e-23	99
7.52457e-25	0.321047	0.184	0.092	MGE	ZNF43	CTX	Macaque	5.97349e-15	99
3.84543e-25	0.320266	0.313	0.186	MGE	BAZ1B	CTX	Macaque	1.06718e-16	99
2.07758e-20	0.318673	0.102	0.043	MGE	NCOR2	CTX	Macaque	1.56315e-13	99
3.63927e-30	0.316216	0.341	0.199	MGE	ENAH	CTX	Macaque	1.14954e-16	99
7.02238e-27	0.312511	0.14	0.06	MGE	BCL10	CTX	Macaque	6.27178e-13	99
1.09973e-19	0.305059	0.165	0.088	MGE	TET1	CTX	Macaque	1.4171e-14	99
2.96151e-26	0.371184	0.125	0.051	MGE	MEIS2	CTX	Macaque	2.12593e-14	98
5.76277e-16	0.344381	0.17	0.099	MGE	GLG1	CTX	Macaque	1.45031e-13	98
1.09239e-32	0.344124	0.137	0.051	MGE	CHMP3	CTX	Macaque	1.28373e-18	98
5.74091e-27	0.341031	0.494	0.322	MGE	BTF3	CTX	Macaque	3.15817e-20	98
4.3806e-16	0.329324	0.219	0.135	MGE	DUSP1	CTX	Macaque	2.38408e-13	98
6.72026e-30	0.329276	0.394	0.237	MGE	EIF3L	CTX	Macaque	1.39676e-19	98
3.33346e-23	0.324417	0.136	0.061	MGE	ING3	CTX	Macaque	7.57556e-17	98
2.89912e-32	0.323057	0.178	0.077	MGE	PCBP4	CTX	Macaque	1.5898e-17	98
2.38201e-16	0.296438	0.19	0.113	MGE	RNF24	CTX	Macaque	4.95059e-13	98
1.25961e-31	0.285799	0.723	0.515	MGE	GABARAP	CTX	Macaque	9.84502e-21	98
3.8713e-25	0.32936	0.305	0.184	MGE	AUTS2	CTX	Macaque	1.23009e-15	97
1.18088e-12	0.32655	0.485	0.393	MGE	PPP1R14B	CTX	Macaque	0.00121556	97
2.11387e-28	0.326048	0.464	0.298	MGE	SRSF5	CTX	Macaque	1.56607e-18	97
5.3769e-35	0.318339	0.411	0.236	MGE	OST4	CTX	Macaque	1.36973e-22	97
5.81057e-19	0.315766	0.121	0.058	MGE	GPCPD1	CTX	Macaque	3.70414e-09	97
2.02427e-32	0.312638	0.157	0.065	MGE	SGCE	CTX	Macaque	1.58665e-13	97
9.43594e-16	0.307167	0.375	0.269	MGE	ID2	CTX	Macaque	7.34566e-10	97
3.21337e-17	0.309043	0.111	0.053	MGE	SESN3	CTX	Macaque	3.95705e-11	96
5.85407e-30	0.295813	0.519	0.336	MGE	SF3B1	CTX	Macaque	4.25834e-17	96
3.6343e-33	0.255681	0.992	0.978	MGE	TUBA1A	CTX	Macaque	5.63573e-23	96
5.34317e-31	0.300892	0.25	0.131	MGE	VTA1	CTX	Macaque	2.72237e-15	95
1.70832e-26	0.296512	0.227	0.12	MGE	TOMM22	CTX	Macaque	3.16126e-17	95
8.99897e-26	0.287807	0.477	0.313	MGE	GPBP1	CTX	Macaque	6.35234e-18	95
2.10214e-19	0.305306	0.155	0.081	MGE	MDM2	CTX	Macaque	4.16848e-14	94
2.03806e-27	0.296774	0.137	0.057	MGE	PTBP1	CTX	Macaque	2.35334e-16	94
1.96348e-20	0.285993	0.342	0.225	MGE	NAV3	CTX	Macaque	5.16116e-13	94
1.26069e-10	0.381218	0.137	0.087	MGE	HSPB1	CTX	Macaque	0.00102735	93
3.20841e-20	0.305121	0.195	0.109	MGE	SNN	CTX	Macaque	1.16974e-13	93
4.94391e-26	0.270502	0.564	0.383	MGE	HMGN1	CTX	Macaque	1.75654e-16	93
4.18674e-19	0.306694	0.227	0.135	MGE	CCNL1	CTX	Macaque	2.18757e-14	92
3.83824e-28	0.295265	0.577	0.403	MGE	EIF1B	CTX	Macaque	8.37665e-15	92
5.70883e-25	0.294105	0.217	0.115	MGE	PNRC2	CTX	Macaque	2.31964e-13	92
2.6174e-19	0.290834	0.123	0.059	MGE	CACHD1	CTX	Macaque	1.02591e-10	92
2.08998e-20	0.286856	0.152	0.076	MGE	TAX1BP3	CTX	Macaque	4.91069e-13	92
1.62718e-22	0.285705	0.313	0.19	MGE	MIDN	CTX	Macaque	9.49011e-14	92
3.82285e-25	0.278228	0.626	0.452	MGE	SMDT1	CTX	Macaque	4.10885e-16	92
7.57145e-20	0.302978	0.381	0.257	MGE	CACYBP	CTX	Macaque	1.90742e-10	91
1.40058e-25	0.302495	0.364	0.225	MGE	PHIP	CTX	Macaque	1.13927e-17	91
1.16949e-25	0.301958	0.355	0.218	MGE	RDX	CTX	Macaque	5.28978e-16	91
6.14013e-23	0.294315	0.271	0.16	MGE	TBCC	CTX	Macaque	2.02422e-13	91
2.55458e-19	0.289169	0.107	0.047	MGE	BTBD3	CTX	Macaque	1.95554e-12	91
8.97957e-23	0.286236	0.117	0.049	MGE	SMIM15	CTX	Macaque	4.40102e-14	91
2.6424e-27	0.297251	0.203	0.101	MGE	SMS	CTX	Macaque	3.80266e-17	90
6.42896e-22	0.279584	0.136	0.063	MGE	UBXN2A	CTX	Macaque	1.8904e-14	90
2.80034e-30	0.303951	0.444	0.275	MGE	CDH2	CTX	Macaque	6.47411e-17	89
1.82285e-24	0.294575	0.555	0.394	MGE	KMT2E	CTX	Macaque	2.59973e-16	89
2.42882e-25	0.281546	0.193	0.098	MGE	CERK	CTX	Macaque	3.69337e-13	89
1.24798e-27	0.275722	0.594	0.411	MGE	ITM2B	CTX	Macaque	2.63153e-16	89
1.27264e-29	0.2825	0.154	0.065	MGE	PAICS	CTX	Macaque	2.00742e-15	88
4.21686e-57	0.568156	0.111	0.016	MGE	MT1E	CTX	Macaque	5.22014e-44	87
5.33933e-29	0.409519	0.111	0.039	MGE	TGFB2	CTX	Macaque	1.25577e-13	87
1.03912e-24	0.30643	0.115	0.046	MGE	PCDH10	CTX	Macaque	4.87985e-15	87
4.86105e-24	0.290207	0.189	0.098	MGE	LAMTOR3	CTX	Macaque	1.77102e-12	87
3.53778e-26	0.286104	0.229	0.122	MGE	CAPZA1	CTX	Macaque	7.8109e-16	87
8.94089e-25	0.274872	0.559	0.389	MGE	DBN1	CTX	Macaque	5.3011e-16	87
5.78529e-23	0.285714	0.224	0.125	MGE	CERS6	CTX	Macaque	3.94192e-13	86
9.04453e-24	0.275475	0.384	0.244	MGE	ACIN1	CTX	Macaque	1.22027e-15	86
2.70804e-17	0.286752	0.161	0.089	MGE	ERICH1	CTX	Macaque	8.90311e-12	85
7.17489e-24	0.281407	0.161	0.078	MGE	FBXW7	CTX	Macaque	1.59472e-13	85
7.93709e-33	0.382035	0.106	0.032	MGE	BTG3	CTX	Macaque	1.0309e-24	84
5.20517e-34	0.277859	0.287	0.15	MGE	STRAP	CTX	Macaque	9.80048e-18	84
7.42137e-24	0.286356	0.222	0.122	MGE	GOLM1	CTX	Macaque	1.80334e-15	83
4.24685e-24	0.350219	0.106	0.041	MGE	KIZ	CTX	Macaque	4.44518e-17	82
7.38837e-19	0.281437	0.293	0.188	MGE	KDM5B	CTX	Macaque	2.6574e-13	82
2.59766e-27	0.277509	0.117	0.044	MGE	ZNF48	CTX	Macaque	7.29861e-12	82
1.68739e-25	0.276263	0.208	0.108	MGE	TNPO1	CTX	Macaque	6.77624e-13	82
3.34881e-21	0.282576	0.407	0.269	MGE	MTDH	CTX	Macaque	5.64073e-16	81
1.02629e-28	0.279207	0.108	0.037	MGE	OSTC	CTX	Macaque	9.27393e-17	81
2.01653e-24	0.273662	0.495	0.331	MGE	RBMX	CTX	Macaque	7.07266e-18	81
1.69743e-36	0.475009	0.112	0.032	MGE	BTG2	CTX	Macaque	2.02029e-23	80
3.76714e-26	0.279836	0.298	0.17	MGE	RALY	CTX	Macaque	1.2433e-17	80
7.48031e-21	0.279366	0.155	0.078	MGE	NIN	CTX	Macaque	9.89742e-13	80
2.0207e-18	0.278701	0.111	0.052	MGE	CERS5	CTX	Macaque	7.3732e-12	80
4.943e-21	0.280709	0.318	0.203	MGE	EPHA5	CTX	Macaque	1.02313e-09	79
4.87982e-32	0.280398	0.238	0.12	MGE	ZMYM2	CTX	Macaque	7.37374e-15	79
3.42532e-24	0.27689	0.193	0.1	MGE	LIMD2	CTX	Macaque	1.22324e-14	79
5.77407e-21	0.276755	0.316	0.198	MGE	MXI1	CTX	Macaque	1.50023e-12	79
3.49376e-18	0.275153	0.105	0.047	MGE	IQGAP1	CTX	Macaque	1.45659e-13	79
2.47706e-19	0.273127	0.174	0.094	MGE	MRPS30	CTX	Macaque	1.17181e-14	79
3.51274e-22	0.270583	0.277	0.165	MGE	MKRN1	CTX	Macaque	9.0172e-16	79
1.06655e-24	0.269927	0.309	0.185	MGE	TBCA	CTX	Macaque	4.49445e-16	78
4.47866e-22	0.27951	0.131	0.06	MGE	PTRHD1	CTX	Macaque	4.83832e-12	77
1.19771e-23	0.278546	0.136	0.061	MGE	USP1	CTX	Macaque	5.24638e-12	77
1.59481e-23	0.278364	0.155	0.074	MGE	FLOT1	CTX	Macaque	1.42469e-12	77
4.49635e-24	0.273219	0.344	0.212	MGE	RBPJ	CTX	Macaque	2.4496e-19	77
9.86952e-20	0.270683	0.143	0.072	MGE	RBM7	CTX	Macaque	8.97139e-13	77
2.59641e-22	0.282721	0.227	0.128	MGE	MAD2L2	CTX	Macaque	1.38091e-14	76
5.56749e-21	0.276386	0.183	0.098	MGE	ABRACL	CTX	Macaque	9.53742e-12	76
1.43057e-21	0.280246	0.213	0.118	MGE	USP3	CTX	Macaque	6.65952e-15	75
3.81499e-22	0.274201	0.138	0.064	MGE	EIF4E	CTX	Macaque	1.30315e-12	75
1.71083e-28	0.269233	0.208	0.103	MGE	PSMD6	CTX	Macaque	8.67812e-16	75
4.59042e-25	0.309866	0.11	0.043	MGE	RNF168	CTX	Macaque	1.76971e-11	74
4.08242e-16	0.274591	0.111	0.055	MGE	LRRN1	CTX	Macaque	2.12173e-11	74
7.23215e-28	0.271608	0.251	0.135	MGE	HOOK3	CTX	Macaque	6.55083e-15	74
5.7024e-31	0.263124	0.235	0.118	MGE	PCBP2	CTX	Macaque	2.80349e-17	74
2.88618e-11	0.272418	0.146	0.092	MGE	LIMA1	CTX	Macaque	2.55008e-07	73
1.10441e-24	0.266992	0.18	0.089	MGE	DAZAP2	CTX	Macaque	1.53063e-16	73
1.01073e-26	0.358338	0.1	0.034	MGE	MAT2B	CTX	Macaque	3.84144e-20	72
9.18762e-30	0.276413	0.327	0.188	MGE	TMEM167A	CTX	Macaque	1.32517e-16	71
1.0705e-22	0.273103	0.144	0.067	MGE	CPE	CTX	Macaque	1.23656e-13	71
1.74998e-30	0.270351	0.332	0.19	MGE	EIF3A	CTX	Macaque	5.83712e-17	71
1.23877e-19	0.279665	0.285	0.176	MGE	PKN2	CTX	Macaque	5.54952e-15	70
4.35562e-16	0.275608	0.262	0.171	MGE	DUT	CTX	Macaque	3.0807e-07	70
5.05379e-18	0.275212	0.15	0.08	MGE	ZNF776	CTX	Macaque	6.02831e-11	70
6.25327e-21	0.263369	0.385	0.254	MGE	PABPC1	CTX	Macaque	2.1909e-18	70
6.46164e-32	0.263339	0.408	0.245	MGE	ARF4	CTX	Macaque	1.35955e-18	70
6.34215e-21	0.270937	0.201	0.112	MGE	LSM2	CTX	Macaque	8.06019e-16	69
2.84571e-23	0.265423	0.246	0.14	MGE	POLR1D	CTX	Macaque	4.09943e-17	69
1.23376e-24	0.2773	0.156	0.072	MGE	GNG5	CTX	Macaque	1.57498e-15	68
5.10173e-19	0.277068	0.108	0.048	MGE	BBX	CTX	Macaque	8.64955e-13	68
2.24215e-14	0.273444	0.108	0.056	MGE	PCNA	CTX	Macaque	1.52331e-08	67
5.16629e-24	0.249844	0.751	0.594	MGE	HNRNPU	CTX	Macaque	4.81297e-14	67
1.33209e-20	0.277965	0.166	0.086	MGE	MOB3B	CTX	Macaque	1.3451e-11	65
3.03818e-22	0.267367	0.209	0.115	MGE	CENPC	CTX	Macaque	8.40033e-13	64
2.4241e-25	0.266482	0.106	0.039	MGE	PHB2	CTX	Macaque	2.84657e-15	64
2.04375e-26	0.273143	0.15	0.067	MGE	HERPUD1	CTX	Macaque	6.32502e-13	63
5.80279e-28	0.272133	0.177	0.082	MGE	CYCS	CTX	Macaque	1.56399e-13	62
1.06584e-27	0.258206	0.506	0.33	MGE	SEC61G	CTX	Macaque	4.40231e-18	62
4.4046e-27	0.268283	0.182	0.089	MGE	MIB1	CTX	Macaque	1.05502e-12	61
8.10174e-17	0.265818	0.163	0.092	MGE	ZBTB10	CTX	Macaque	1.69111e-10	61
6.44838e-20	0.264831	0.28	0.172	MGE	ENSA	CTX	Macaque	7.95283e-16	61
8.99168e-28	0.2567	0.223	0.115	MGE	PSMC6	CTX	Macaque	6.62654e-15	61
1.40643e-18	0.268733	0.188	0.107	MGE	SRRT	CTX	Macaque	5.83755e-12	60
1.56605e-26	0.267893	0.234	0.126	MGE	LBR	CTX	Macaque	6.07011e-15	60
1.46786e-53	0.511483	0.241	0.099	MGE	NPY	CTX	Macaque	2.95887e-36	59
4.42969e-23	0.275659	0.188	0.099	MGE	ZNF260	CTX	Macaque	3.52354e-11	59
2.45087e-22	0.258723	0.674	0.489	MGE	TOMM7	CTX	Macaque	1.43141e-18	59
4.5465e-30	0.258666	0.268	0.144	MGE	POLB	CTX	Macaque	2.20496e-16	59
6.62445e-18	0.255321	0.122	0.06	MGE	SCNM1	CTX	Macaque	5.15624e-12	59
1.05109e-24	0.24865	0.76	0.578	MGE	SON	CTX	Macaque	2.79395e-18	59
8.20028e-21	0.272572	0.224	0.129	MGE	B2M	CTX	Macaque	2.47553e-11	58
1.21429e-21	0.267198	0.223	0.128	MGE	ZNF708	CTX	Macaque	7.01355e-12	58
1.10172e-21	0.263817	0.116	0.05	MGE	TMEM97	CTX	Macaque	2.37282e-12	58
1.63712e-06	0.328655	0.112	0.078	MGE	APOE	CTX	Macaque	0.00682124	57
2.18955e-23	0.274487	0.255	0.146	MGE	TKT	CTX	Macaque	1.79808e-15	57
5.74463e-22	0.270962	0.204	0.111	MGE	KLF12	CTX	Macaque	5.30025e-14	57
1.02817e-22	0.261134	0.283	0.167	MGE	UBE2R2	CTX	Macaque	7.95548e-15	57
9.09588e-24	0.268487	0.127	0.055	MGE	EAF1	CTX	Macaque	2.32516e-11	56
3.77891e-24	0.265466	0.127	0.054	MGE	HAUS1	CTX	Macaque	7.65796e-13	56
9.1352e-22	0.260966	0.433	0.292	MGE	ARPC3	CTX	Macaque	1.55216e-17	56
6.94958e-22	0.271204	0.195	0.105	MGE	IDH1	CTX	Macaque	6.37547e-15	55
4.13476e-18	0.265102	0.128	0.064	MGE	VAT1	CTX	Macaque	1.05641e-10	55
2.03051e-15	0.269573	0.285	0.192	MGE	HSPD1	CTX	Macaque	1.26236e-11	54
4.20125e-19	0.266587	0.191	0.108	MGE	PPP1R10	CTX	Macaque	1.44779e-12	53
4.7671e-25	0.25656	0.173	0.084	MGE	ECHDC1	CTX	Macaque	3.07313e-14	53
1.38511e-22	0.292716	0.107	0.043	MGE	RFTN2	CTX	Macaque	6.15179e-12	51
1.58024e-21	0.269232	0.171	0.089	MGE	TBPL1	CTX	Macaque	2.01875e-12	51
4.44388e-24	0.263126	0.241	0.133	MGE	RBM33	CTX	Macaque	1.5131e-17	51
2.65778e-19	0.26289	0.136	0.068	MGE	FAM184A	CTX	Macaque	3.63379e-13	51
8.75028e-23	0.261061	0.113	0.047	MGE	HBP1	CTX	Macaque	5.77382e-13	51
4.40806e-23	0.260524	0.154	0.073	MGE	PGD	CTX	Macaque	2.58477e-15	51
1.28708e-20	0.25997	0.163	0.085	MGE	CDO1	CTX	Macaque	1.93755e-11	51
1.74834e-23	0.259814	0.196	0.103	MGE	TRIM13	CTX	Macaque	8.04176e-14	51
3.74285e-23	0.262889	0.164	0.081	MGE	EIF2S3	CTX	Macaque	8.07632e-13	50
1.87616e-21	0.337825	0.102	0.041	MGE	GADD45A	CTX	Macaque	2.69094e-14	49
5.52124e-21	0.261194	0.174	0.091	MGE	MED10	CTX	Macaque	9.24166e-15	49
1.01479e-22	0.260876	0.166	0.083	MGE	SLC35B1	CTX	Macaque	1.73722e-13	49
3.52613e-25	0.260572	0.281	0.163	MGE	PAXBP1	CTX	Macaque	7.88394e-13	49
1.10072e-20	0.252896	0.244	0.142	MGE	SNRPG	CTX	Macaque	1.20166e-15	49
3.7399e-24	0.252071	0.46	0.306	MGE	BZW1	CTX	Macaque	1.06788e-14	49
6.52473e-21	0.258918	0.166	0.085	MGE	PHF21B	CTX	Macaque	1.81897e-13	48
1.14208e-25	0.25494	0.36	0.22	MGE	UBE2B	CTX	Macaque	1.81623e-16	47
2.8324e-23	0.254507	0.313	0.189	MGE	NDUFB5	CTX	Macaque	3.01398e-17	47
1.14447e-22	0.274879	0.104	0.041	MGE	SRSF8	CTX	Macaque	4.398e-14	46
7.06383e-24	0.26309	0.101	0.038	MGE	CTNNAL1	CTX	Macaque	3.38629e-15	46
9.9341e-16	0.262342	0.316	0.218	MGE	LMO4	CTX	Macaque	6.66838e-10	46
1.20321e-19	0.259388	0.103	0.044	MGE	SMAD1	CTX	Macaque	7.18464e-13	46
3.09155e-16	0.257155	0.118	0.06	MGE	SNRK	CTX	Macaque	3.37078e-10	46
6.89724e-21	0.254901	0.409	0.272	MGE	ARID4B	CTX	Macaque	4.44789e-15	46
9.43113e-22	0.250638	0.537	0.375	MGE	SARAF	CTX	Macaque	3.22586e-16	46
5.73993e-20	0.265367	0.1	0.042	MGE	PLEKHA8	CTX	Macaque	6.71012e-11	45
4.00291e-23	0.242231	0.836	0.713	MGE	UBC	CTX	Macaque	1.1515e-15	45
4.43246e-20	0.275098	0.102	0.043	MGE	TTL	CTX	Macaque	7.22725e-12	44
9.98744e-17	0.264324	0.13	0.068	MGE	MFAP2	CTX	Macaque	2.448e-09	44
1.76634e-17	0.260666	0.144	0.076	MGE	MLEC	CTX	Macaque	6.53079e-12	44
2.68676e-16	0.253431	0.151	0.083	MGE	RAP1A	CTX	Macaque	1.78755e-12	44
3.48359e-30	0.270988	0.289	0.158	MGE	HNRNPF	CTX	Macaque	6.1408e-17	43
1.59389e-24	0.253519	0.367	0.231	MGE	ARPC1A	CTX	Macaque	3.76105e-16	43
4.43157e-20	0.248848	0.267	0.16	MGE	MRPL51	CTX	Macaque	5.79133e-14	42
3.96059e-25	0.265663	0.202	0.105	MGE	PHACTR4	CTX	Macaque	2.05703e-13	41
1.10813e-17	0.259171	0.122	0.06	MGE	CHST11	CTX	Macaque	4.31494e-11	41
2.0749e-17	0.257289	0.23	0.141	MGE	RBBP6	CTX	Macaque	7.76379e-14	41
2.14164e-26	0.259242	0.131	0.054	MGE	CHMP1B	CTX	Macaque	1.92728e-12	40
4.62497e-26	0.257615	0.153	0.069	MGE	LLPH	CTX	Macaque	6.65639e-13	40
8.00076e-19	0.258517	0.2	0.115	MGE	ANKLE2	CTX	Macaque	1.76534e-12	39
8.03814e-17	0.255664	0.27	0.175	MGE	IRF2BP2	CTX	Macaque	9.92446e-09	39
1.89448e-23	0.255425	0.128	0.056	MGE	RRP1B	CTX	Macaque	4.96789e-12	39
9.94265e-20	0.25212	0.221	0.129	MGE	EP300	CTX	Macaque	1.16867e-13	39
1.56175e-18	0.258602	0.28	0.177	MGE	RNPS1	CTX	Macaque	3.78936e-15	38
1.83837e-21	0.256584	0.177	0.092	MGE	ACTB	CTX	Macaque	2.44262e-11	38
2.66422e-21	0.252895	0.151	0.074	MGE	HADHA	CTX	Macaque	3.51813e-13	38
1.43166e-22	0.249384	0.214	0.118	MGE	BRWD1	CTX	Macaque	2.75369e-12	38
4.98219e-20	0.247912	0.207	0.118	MGE	LMNB1	CTX	Macaque	3.07553e-12	38
1.48208e-18	0.255705	0.162	0.087	MGE	DNTTIP2	CTX	Macaque	1.71016e-13	37
2.39671e-17	0.255469	0.155	0.084	MGE	LMNA	CTX	Macaque	2.68276e-12	37
1.65822e-35	0.293605	0.103	0.028	MGE	HAT1	CTX	Macaque	2.84477e-16	36
8.05523e-26	0.260662	0.134	0.057	MGE	MZT1	CTX	Macaque	3.55938e-14	36
1.42536e-18	0.258709	0.198	0.115	MGE	UBTD2	CTX	Macaque	4.82297e-12	36
1.05185e-16	0.257517	0.144	0.078	MGE	SOS2	CTX	Macaque	8.28327e-10	36
1.21927e-20	0.256737	0.138	0.066	MGE	MTA2	CTX	Macaque	4.53454e-15	36
1.4058e-15	0.255719	0.127	0.067	MGE	HEXIM1	CTX	Macaque	5.95249e-09	35
3.01776e-15	0.252511	0.114	0.058	MGE	KCNH7	CTX	Macaque	3.22713e-09	35
4.10066e-20	0.244997	0.438	0.296	MGE	YTHDC1	CTX	Macaque	1.67331e-16	35
1.14815e-18	0.248086	0.143	0.074	MGE	ZNF91	CTX	Macaque	5.13477e-11	34
7.8556e-22	0.256503	0.264	0.155	MGE	GTF3C6	CTX	Macaque	2.19527e-14	33
3.87123e-19	0.255014	0.305	0.196	MGE	BRD4	CTX	Macaque	1.19793e-15	33
3.19322e-27	0.254136	0.38	0.232	MGE	UBE2D2	CTX	Macaque	1.1293e-19	33
3.28595e-34	0.403129	0.1	0.027	MGE	TRIM8	CTX	Macaque	2.82503e-24	32
1.90774e-12	0.259059	0.185	0.121	MGE	CHORDC1	CTX	Macaque	2.42068e-05	32
2.83604e-20	0.252427	0.114	0.051	MGE	PSEN1	CTX	Macaque	7.08438e-11	32
9.91524e-22	0.250222	0.305	0.188	MGE	ENY2	CTX	Macaque	1.60272e-15	32
1.50469e-26	0.401026	0.102	0.037	MGE	DSEL	CTX	Macaque	1.00976e-16	31
2.48925e-22	0.25819	0.168	0.085	MGE	NME4	CTX	Macaque	1.18712e-15	31
7.41866e-21	0.254447	0.135	0.064	MGE	EFCAB2	CTX	Macaque	1.00689e-12	31
8.79104e-23	0.251797	0.343	0.213	MGE	TMEM59	CTX	Macaque	8.48547e-15	31
8.26914e-14	0.269829	0.1	0.052	MGE	ZFP82	CTX	Macaque	3.45694e-10	30
8.48228e-18	0.261436	0.144	0.076	MGE	CREBRF	CTX	Macaque	2.45689e-11	30
9.17278e-17	0.260365	0.173	0.099	MGE	JAK1	CTX	Macaque	1.77489e-11	30
8.76995e-23	0.259362	0.137	0.063	MGE	EFNB1	CTX	Macaque	4.35931e-11	30
1.56307e-16	0.257023	0.167	0.095	MGE	TIAM2	CTX	Macaque	1.9564e-10	30
3.655e-20	0.252366	0.148	0.075	MGE	PRPF38A	CTX	Macaque	8.25985e-14	30
4.67293e-22	0.257129	0.184	0.096	MGE	LAMTOR2	CTX	Macaque	1.11039e-12	29
2.00104e-24	0.254002	0.19	0.097	MGE	DHX15	CTX	Macaque	1.33543e-13	29
7.99974e-23	0.248934	0.168	0.084	MGE	CDKN2AIPNL	CTX	Macaque	1.55733e-14	29
1.74387e-19	0.247645	0.241	0.144	MGE	SETD2	CTX	Macaque	2.38709e-12	29
2.39044e-23	0.257638	0.245	0.14	MGE	EXOC5	CTX	Macaque	1.30868e-13	28
4.02231e-14	0.255038	0.349	0.251	MGE	DEK	CTX	Macaque	1.20053e-09	28
8.81101e-18	0.251182	0.142	0.074	MGE	NMT2	CTX	Macaque	1.0358e-08	28
5.97262e-19	0.244649	0.403	0.273	MGE	HMGB3	CTX	Macaque	4.83236e-14	28
2.31678e-21	0.26167	0.239	0.14	MGE	ZNF326	CTX	Macaque	1.41203e-15	27
1.27669e-16	0.274816	0.1	0.047	MGE	ARPP21	CTX	Macaque	6.02452e-11	26
7.92054e-23	0.253215	0.194	0.103	MGE	MRPL42	CTX	Macaque	2.25899e-15	26
6.7632e-23	0.252785	0.129	0.057	MGE	AKR1B1	CTX	Macaque	7.43946e-13	26
7.89833e-17	0.251764	0.109	0.052	MGE	RBM12	CTX	Macaque	4.63623e-12	26
2.50381e-18	0.247276	0.177	0.098	MGE	CPNE3	CTX	Macaque	9.71551e-11	26
1.944e-26	0.260873	0.279	0.156	MGE	ILF2	CTX	Macaque	3.41796e-18	25
2.62257e-16	0.255423	0.112	0.055	MGE	MRGBP	CTX	Macaque	3.48826e-12	25
6.09621e-20	0.254289	0.176	0.095	MGE	ZNF92	CTX	Macaque	1.97388e-14	25
3.68064e-25	0.252113	0.208	0.109	MGE	SERP1	CTX	Macaque	2.0047e-15	25
2.84298e-20	0.256401	0.254	0.152	MGE	ANP32B	CTX	Macaque	1.43738e-12	24
1.10944e-23	0.254691	0.203	0.108	MGE	BCAS2	CTX	Macaque	1.06995e-15	24
5.84617e-19	0.251427	0.202	0.115	MGE	CHD1	CTX	Macaque	5.1981e-13	24
3.67609e-17	0.24886	0.253	0.16	MGE	RYBP	CTX	Macaque	1.05529e-11	24
8.33557e-24	0.245921	0.14	0.063	MGE	MAPK1IP1L	CTX	Macaque	6.46835e-15	24
7.51975e-22	0.260767	0.101	0.04	MGE	SPG21	CTX	Macaque	6.57954e-13	23
1.63582e-22	0.25853	0.255	0.151	MGE	ATF4	CTX	Macaque	4.30271e-15	23
6.37555e-24	0.254138	0.401	0.259	MGE	NDUFB1	CTX	Macaque	1.34535e-17	23
1.40805e-22	0.2455	0.505	0.35	MGE	SOX1	CTX	Macaque	2.09792e-15	23
3.59403e-26	0.24005	0.356	0.216	MGE	MYH10	CTX	Macaque	9.63673e-17	23
3.12505e-16	0.261462	0.142	0.077	MGE	PPP1R2	CTX	Macaque	2.61754e-13	22
1.90436e-17	0.258125	0.101	0.046	MGE	PRCC	CTX	Macaque	2.95877e-14	22
7.7882e-13	0.256255	0.106	0.058	MGE	SCN9A	CTX	Macaque	9.82459e-08	22
2.40789e-20	0.255879	0.252	0.151	MGE	HMGN3	CTX	Macaque	6.37538e-14	22
5.4095e-19	0.25228	0.169	0.091	MGE	EMC10	CTX	Macaque	2.47801e-12	22
2.22419e-22	0.251856	0.145	0.069	MGE	CNIH4	CTX	Macaque	9.67645e-14	22
1.7365e-21	0.248631	0.123	0.056	MGE	RCC2	CTX	Macaque	6.79408e-13	22
9.68876e-21	0.244888	0.131	0.062	MGE	MAN1A2	CTX	Macaque	5.7926e-14	22
1.90408e-18	0.252468	0.208	0.123	MGE	FRA10AC1	CTX	Macaque	1.00011e-12	21
1.62574e-19	0.25233	0.115	0.053	MGE	SREBF2	CTX	Macaque	3.79719e-14	21
1.32823e-19	0.25025	0.128	0.061	MGE	SSR3	CTX	Macaque	2.16473e-12	21
1.5081e-23	0.249947	0.287	0.171	MGE	KDM5A	CTX	Macaque	5.46773e-16	21
1.06328e-18	0.249117	0.129	0.064	MGE	SLC35E2B	CTX	Macaque	5.75295e-13	21
2.99397e-22	0.247046	0.143	0.067	MGE	GLO1	CTX	Macaque	7.76035e-13	21
5.19791e-15	0.249503	0.1	0.049	MGE	NDFIP2	CTX	Macaque	3.06151e-11	20
1.42228e-21	0.24913	0.468	0.321	MGE	EPC1	CTX	Macaque	3.08293e-15	20
4.78481e-24	0.248274	0.324	0.197	MGE	EWSR1	CTX	Macaque	2.15114e-16	20
3.05987e-20	0.245183	0.182	0.099	MGE	RAB4A	CTX	Macaque	5.50044e-15	20
6.74031e-25	0.243555	0.258	0.146	MGE	TMEM50A	CTX	Macaque	1.23511e-15	20
6.02894e-63	0.628456	0.1	0.008	MGE	DLL1	CTX	Macaque	3.98822e-51	19
1.83872e-25	0.250263	0.344	0.209	MGE	IDH2	CTX	Macaque	6.62309e-17	19
1.41635e-27	0.24742	0.306	0.178	MGE	GATAD2B	CTX	Macaque	5.57065e-15	19
1.51231e-18	0.245746	0.104	0.046	MGE	SAP30	CTX	Macaque	8.58647e-13	19
5.15273e-25	0.243237	0.413	0.263	MGE	NONO	CTX	Macaque	1.81658e-17	19
5.30799e-22	0.311113	0.1	0.039	MGE	FRAT1	CTX	Macaque	1.89948e-16	18
1.98194e-22	0.267397	0.101	0.039	MGE	GMCL1	CTX	Macaque	2.41724e-13	18
5.32106e-18	0.255336	0.135	0.068	MGE	ANKRD10	CTX	Macaque	1.92289e-14	18
1.36489e-15	0.252358	0.321	0.219	MGE	CCNG2	CTX	Macaque	2.48597e-11	18
9.81343e-17	0.243786	0.235	0.147	MGE	SCD5	CTX	Macaque	3.85374e-09	18
3.24603e-18	0.25655	0.109	0.051	MGE	UGCG	CTX	Macaque	4.38326e-10	17
1.00952e-22	0.255572	0.135	0.062	MGE	CHCHD3	CTX	Macaque	2.52608e-14	17
7.2662e-22	0.246123	0.368	0.237	MGE	RWDD1	CTX	Macaque	8.39705e-17	17
6.91405e-22	0.243424	0.21	0.115	MGE	PPP4R2	CTX	Macaque	4.41543e-14	17
1.03101e-23	0.248204	0.476	0.324	MGE	HNRNPAB	CTX	Macaque	8.66579e-14	16
8.21858e-23	0.243858	0.427	0.279	MGE	XRCC6	CTX	Macaque	3.63076e-16	16
2.48188e-19	0.241647	0.16	0.085	MGE	MYT1	CTX	Macaque	5.10238e-10	16
7.73751e-15	0.240648	0.124	0.067	MGE	EXT2	CTX	Macaque	5.50784e-11	16
1.31206e-18	0.240636	0.138	0.069	MGE	TSEN34	CTX	Macaque	7.8219e-12	16
1.21217e-16	0.26103	0.136	0.071	MGE	YES1	CTX	Macaque	9.23985e-12	15
7.66061e-24	0.251787	0.31	0.186	MGE	GDI2	CTX	Macaque	4.89959e-14	15
2.75453e-14	0.247458	0.244	0.162	MGE	SLC10A4	CTX	Macaque	6.70587e-08	15
1.69506e-15	0.256744	0.1	0.048	MGE	TXNDC16	CTX	Macaque	4.55324e-09	14
1.86609e-21	0.250462	0.208	0.116	MGE	SCAF11	CTX	Macaque	2.53123e-12	14
8.60865e-21	0.248393	0.213	0.122	MGE	DOCK7	CTX	Macaque	1.36321e-12	14
3.72823e-16	0.247875	0.196	0.118	MGE	CDC42SE2	CTX	Macaque	3.21191e-12	14
1.49446e-15	0.244398	0.155	0.088	MGE	FMR1	CTX	Macaque	1.27677e-10	14
3.95628e-23	0.243605	0.212	0.114	MGE	HSD17B10	CTX	Macaque	6.39023e-16	14
1.41175e-19	0.240438	0.513	0.359	MGE	YWHAZ	CTX	Macaque	6.52756e-14	14
2.81321e-20	0.234051	0.586	0.425	MGE	RBM39	CTX	Macaque	3.08749e-15	14
2.72835e-07	0.257061	0.119	0.08	MGE	GNS	CTX	Macaque	0.0070427	13
4.79264e-22	0.250681	0.275	0.164	MGE	ANP32A	CTX	Macaque	2.05869e-14	13
4.30283e-20	0.250182	0.52	0.364	MGE	SNRPE	CTX	Macaque	6.47511e-17	13
3.68304e-19	0.249735	0.179	0.098	MGE	CETN2	CTX	Macaque	1.02684e-10	13
2.39356e-18	0.249675	0.127	0.062	MGE	PPIL3	CTX	Macaque	2.63306e-13	13
3.46499e-18	0.249538	0.504	0.364	MGE	CENPV	CTX	Macaque	4.72085e-13	13
1.19525e-12	0.24816	0.161	0.1	MGE	FAM214A	CTX	Macaque	7.98536e-08	13
1.0631e-20	0.247388	0.181	0.096	MGE	FDPS	CTX	Macaque	2.13758e-14	13
9.50238e-24	0.242392	0.36	0.227	MGE	PAPOLA	CTX	Macaque	5.5655e-17	13
2.14878e-20	0.237327	0.213	0.121	MGE	CRIPT	CTX	Macaque	6.73955e-15	13
7.14919e-18	0.23616	0.168	0.093	MGE	CDK13	CTX	Macaque	8.4626e-12	13
1.39159e-16	0.249404	0.157	0.088	MGE	TXNRD1	CTX	Macaque	2.38748e-12	12
4.96533e-17	0.248133	0.219	0.133	MGE	CASP3	CTX	Macaque	2.70056e-13	12
1.2141e-17	0.246708	0.118	0.057	MGE	KANSL2	CTX	Macaque	1.12222e-11	12
1.43336e-18	0.246114	0.128	0.063	MGE	ZNF414	CTX	Macaque	5.94617e-12	12
4.86542e-19	0.245043	0.132	0.065	MGE	AGO1	CTX	Macaque	6.46565e-13	12
1.08486e-21	0.242244	0.392	0.259	MGE	TCAF1	CTX	Macaque	6.87034e-13	12
3.70379e-18	0.240532	0.122	0.059	MGE	MSMO1	CTX	Macaque	8.81702e-12	12
9.37498e-15	0.239561	0.111	0.058	MGE	TLK1	CTX	Macaque	3.91231e-10	12
5.7458e-23	0.237855	0.137	0.062	MGE	P4HB	CTX	Macaque	1.88913e-12	12
7.13145e-16	0.250255	0.103	0.05	MGE	PCGF3	CTX	Macaque	5.57125e-11	11
2.4551e-17	0.250093	0.105	0.049	MGE	CISD2	CTX	Macaque	8.58087e-14	11
9.75247e-22	0.24482	0.246	0.144	MGE	RBM5	CTX	Macaque	2.82146e-16	11
6.21728e-17	0.244322	0.116	0.057	MGE	RCOR2	CTX	Macaque	2.87527e-12	11
6.88852e-19	0.241026	0.118	0.055	MGE	MED23	CTX	Macaque	4.661e-13	11
1.89716e-19	0.240721	0.225	0.132	MGE	NRIP1	CTX	Macaque	7.76154e-15	11
1.25045e-11	0.236669	0.16	0.102	MGE	TSPAN13	CTX	Macaque	4.3611e-06	11
1.97676e-30	0.42974	0.101	0.031	MGE	MNS1	CTX	Macaque	5.39749e-24	10
5.55616e-22	0.282548	0.1	0.039	MGE	HADHB	CTX	Macaque	3.19789e-16	10
7.93771e-23	0.254038	0.577	0.422	MGE	ZNF292	CTX	Macaque	4.90612e-14	10
2.58466e-17	0.252477	0.124	0.063	MGE	ZNF430	CTX	Macaque	7.61717e-12	10
1.30143e-24	0.251379	0.339	0.206	MGE	GNB2	CTX	Macaque	5.04382e-18	10
2.07307e-17	0.250171	0.13	0.066	MGE	CASD1	CTX	Macaque	4.48528e-11	10
4.23975e-22	0.249453	0.238	0.134	MGE	PCNP	CTX	Macaque	7.5272e-15	10
9.02377e-20	0.248951	0.226	0.132	MGE	SNRPF	CTX	Macaque	1.38175e-14	10
2.81176e-18	0.245097	0.109	0.05	MGE	CCNK	CTX	Macaque	8.24238e-12	10
7.29389e-22	0.244793	0.156	0.077	MGE	CLDND1	CTX	Macaque	2.28399e-13	10
3.55174e-18	0.242491	0.16	0.087	MGE	PTPRN2	CTX	Macaque	1.78999e-12	10
2.24558e-25	0.242113	0.446	0.289	MGE	UBXN1	CTX	Macaque	1.48866e-18	10
1.93252e-50	0.572624	0.101	0.016	MGE	SETD7	CTX	Macaque	6.02709e-37	9
3.17848e-25	0.296852	0.1	0.036	MGE	SENP2	CTX	Macaque	2.0487e-15	9
1.288e-20	0.248319	0.297	0.185	MGE	PNMA1	CTX	Macaque	9.57459e-16	9
3.58681e-18	0.248218	0.212	0.126	MGE	SEC11A	CTX	Macaque	2.23809e-13	9
1.7529e-17	0.24387	0.142	0.074	MGE	CTNNBIP1	CTX	Macaque	8.12181e-11	9
1.65665e-15	0.243414	0.209	0.13	MGE	FHL1	CTX	Macaque	1.53435e-11	9
9.98104e-17	0.241735	0.172	0.098	MGE	ZNF518B	CTX	Macaque	3.0124e-11	9
1.94133e-17	0.241462	0.109	0.052	MGE	DIDO1	CTX	Macaque	1.763e-12	9
3.57841e-17	0.237999	0.111	0.053	MGE	BLVRA	CTX	Macaque	2.17316e-12	9
1.08833e-19	0.23794	0.225	0.131	MGE	EHMT1	CTX	Macaque	5.14295e-14	9
1.67807e-21	0.235849	0.526	0.365	MGE	TRA2B	CTX	Macaque	2.30149e-15	9
1.14656e-17	0.277189	0.105	0.049	MGE	FAM110A	CTX	Macaque	2.12153e-14	8
1.69023e-19	0.253368	0.435	0.296	MGE	CCDC50	CTX	Macaque	3.44734e-16	8
2.88913e-21	0.247561	0.257	0.153	MGE	ERGIC3	CTX	Macaque	1.67359e-15	8
1.36264e-23	0.247307	0.284	0.168	MGE	SNF8	CTX	Macaque	4.4615e-15	8
9.20431e-18	0.246422	0.195	0.113	MGE	WBP11	CTX	Macaque	1.34486e-13	8
4.41533e-22	0.244698	0.254	0.148	MGE	TMBIM6	CTX	Macaque	3.30541e-15	8
2.30648e-23	0.241582	0.187	0.096	MGE	TIMM17A	CTX	Macaque	1.01993e-15	8
1.68556e-22	0.23954	0.252	0.144	MGE	SENP6	CTX	Macaque	3.72759e-14	8
1.05879e-16	0.238781	0.102	0.048	MGE	ETF1	CTX	Macaque	4.0612e-13	8
8.55846e-18	0.233185	0.807	0.667	MGE	DDX5	CTX	Macaque	1.96816e-12	8
1.40175e-48	0.513739	0.101	0.017	MGE	SERINC2	CTX	Macaque	3.49487e-39	7
3.76143e-21	0.260784	0.294	0.181	MGE	PSMD11	CTX	Macaque	8.60099e-17	7
2.43462e-22	0.260146	0.236	0.134	MGE	UPF2	CTX	Macaque	8.14755e-15	7
3.84722e-18	0.247155	0.149	0.078	MGE	CKAP4	CTX	Macaque	1.08498e-12	7
3.33245e-25	0.247076	0.239	0.13	MGE	G3BP1	CTX	Macaque	5.33122e-15	7
2.25901e-19	0.243745	0.104	0.045	MGE	SNRNP25	CTX	Macaque	9.03845e-13	7
2.72759e-22	0.241652	0.378	0.241	MGE	PFDN4	CTX	Macaque	3.39295e-18	7
1.83324e-24	0.236461	0.344	0.206	MGE	PUF60	CTX	Macaque	5.81461e-18	7
1.76983e-21	0.235809	0.39	0.253	MGE	LAGE3	CTX	Macaque	5.38022e-14	7
1.11291e-21	0.256229	0.223	0.124	MGE	ROCK1	CTX	Macaque	6.40638e-15	6
7.36579e-23	0.256057	0.383	0.246	MGE	DHX9	CTX	Macaque	1.92072e-16	6
1.14017e-16	0.254169	0.166	0.094	MGE	CCDC167	CTX	Macaque	6.18523e-12	6
3.95661e-19	0.251475	0.21	0.122	MGE	VEZT	CTX	Macaque	1.62467e-14	6
2.46131e-19	0.251099	0.149	0.078	MGE	TIMM50	CTX	Macaque	1.93058e-14	6
2.79749e-19	0.246272	0.199	0.113	MGE	ZNF134	CTX	Macaque	7.1171e-12	6
9.56454e-14	0.244554	0.128	0.071	MGE	CNOT6	CTX	Macaque	2.69612e-10	6
1.40137e-10	0.240707	0.156	0.101	MGE	LSAMP	CTX	Macaque	0.000512731	6
1.36564e-17	0.2377	0.134	0.069	MGE	FUT8	CTX	Macaque	2.28045e-12	6
1.9102e-19	0.263898	0.1	0.042	MGE	SPTLC1	CTX	Macaque	1.08273e-14	5
2.27086e-17	0.259708	0.207	0.124	MGE	LMBR1L	CTX	Macaque	6.30068e-10	5
7.3545e-19	0.256861	0.1	0.043	MGE	MSL2	CTX	Macaque	3.7754e-14	5
1.8571e-13	0.253965	0.146	0.087	MGE	ARMCX1	CTX	Macaque	4.5767e-09	5
4.53705e-27	0.249343	0.521	0.351	MGE	COX6B1	CTX	Macaque	1.46883e-19	5
1.3447e-21	0.245307	0.293	0.178	MGE	SSR2	CTX	Macaque	7.04786e-17	5
6.83565e-21	0.24226	0.336	0.214	MGE	USP47	CTX	Macaque	6.18335e-15	5
2.49464e-21	0.241898	0.219	0.124	MGE	CHURC1	CTX	Macaque	4.5414e-14	5
1.94032e-16	0.240127	0.169	0.097	MGE	INIP	CTX	Macaque	7.23572e-13	5
1.58886e-14	0.239933	0.115	0.06	MGE	ZBED4	CTX	Macaque	2.15419e-10	5
5.85275e-20	0.23862	0.128	0.06	MGE	GRSF1	CTX	Macaque	1.36937e-13	5
4.25561e-15	0.237399	0.103	0.051	MGE	MCPH1	CTX	Macaque	1.28606e-11	5
1.32877e-22	0.236387	0.576	0.396	MGE	PPDPF	CTX	Macaque	2.03683e-16	5
1.65296e-17	0.235778	0.186	0.107	MGE	CFAP20	CTX	Macaque	1.86773e-12	5
3.76817e-11	0.234087	0.142	0.088	MGE	ASCL1	CTX	Macaque	1.14074e-07	5
1.3082e-22	0.232747	0.292	0.174	MGE	EIF3M	CTX	Macaque	5.69192e-17	5
2.66624e-17	0.231383	0.126	0.064	MGE	ZNF620	CTX	Macaque	1.83441e-10	5
3.20191e-20	0.227933	0.151	0.076	MGE	OXA1L	CTX	Macaque	2.19168e-13	5
1.41466e-29	0.348557	0.103	0.033	MGE	VRK1	CTX	Macaque	3.9005e-22	4
1.19026e-20	0.266688	0.1	0.041	MGE	THAP1	CTX	Macaque	1.16221e-14	4
3.32245e-16	0.263641	0.157	0.089	MGE	TRIM36	CTX	Macaque	2.62338e-11	4
2.45127e-18	0.256835	0.113	0.053	MGE	KIAA1143	CTX	Macaque	1.1486e-12	4
5.17891e-16	0.252384	0.19	0.114	MGE	NSRP1	CTX	Macaque	1.96395e-09	4
1.17295e-21	0.244061	0.364	0.232	MGE	ATG12	CTX	Macaque	1.29708e-17	4
6.82951e-22	0.242513	0.146	0.07	MGE	ACP1	CTX	Macaque	4.5326e-14	4
2.59615e-21	0.242024	0.18	0.095	MGE	COMMD9	CTX	Macaque	1.00509e-12	4
1.16317e-20	0.241856	0.188	0.103	MGE	SLU7	CTX	Macaque	1.09331e-13	4
2.96554e-17	0.241622	0.112	0.054	MGE	ZNF664	CTX	Macaque	5.93969e-13	4
7.64366e-22	0.241494	0.109	0.045	MGE	NUP62	CTX	Macaque	1.3199e-15	4
2.3624e-14	0.241107	0.109	0.057	MGE	TMEM87A	CTX	Macaque	1.03219e-10	4
7.00971e-21	0.239307	0.183	0.098	MGE	ADH5	CTX	Macaque	7.55022e-16	4
1.39012e-16	0.239238	0.196	0.117	MGE	OS9	CTX	Macaque	1.04947e-12	4
9.14546e-15	0.23778	0.166	0.098	MGE	TOPORS	CTX	Macaque	3.27091e-11	4
9.75551e-24	0.237713	0.465	0.312	MGE	SRRM1	CTX	Macaque	1.39613e-17	4
9.90928e-14	0.237348	0.156	0.093	MGE	PDZRN3	CTX	Macaque	6.2917e-08	4
7.88988e-22	0.237012	0.509	0.352	MGE	PBRM1	CTX	Macaque	8.93315e-17	4
3.69223e-25	0.236208	0.367	0.227	MGE	SCAND1	CTX	Macaque	3.51437e-16	4
1.01323e-20	0.234078	0.597	0.433	MGE	CBX1	CTX	Macaque	1.40686e-13	4
6.85689e-19	0.233971	0.109	0.049	MGE	AKAP8	CTX	Macaque	1.21025e-10	4
3.20796e-19	0.233621	0.435	0.297	MGE	THRAP3	CTX	Macaque	1.13893e-15	4
2.61736e-21	0.232404	0.322	0.2	MGE	RSL1D1	CTX	Macaque	1.16206e-14	4
1.52241e-18	0.229411	0.404	0.279	MGE	ATF7IP	CTX	Macaque	1.65997e-09	4
3.25064e-22	0.228522	0.353	0.226	MGE	SPEN	CTX	Macaque	2.17249e-15	4
2.79373e-49	1.05502	0.1	0.016	MGE	TOP2A	CTX	Macaque	1.32227e-45	3
2.49263e-27	0.378499	0.1	0.034	MGE	TRPS1	CTX	Macaque	1.18066e-23	3
5.38308e-24	0.271001	0.166	0.081	MGE	GLRX3	CTX	Macaque	5.42058e-17	3
1.26482e-21	0.262909	0.187	0.1	MGE	SMNDC1	CTX	Macaque	7.70952e-16	3
6.70453e-21	0.255167	0.364	0.237	MGE	SPTBN1	CTX	Macaque	3.55298e-15	3
3.24652e-15	0.254977	0.175	0.104	MGE	TRAF4	CTX	Macaque	1.55111e-11	3
2.89016e-20	0.254026	0.15	0.075	MGE	ZNF195	CTX	Macaque	6.8158e-16	3
5.82723e-19	0.253335	0.247	0.151	MGE	ZNF300	CTX	Macaque	4.05787e-10	3
2.19558e-17	0.249516	0.13	0.066	MGE	NUTF2	CTX	Macaque	9.6661e-13	3
2.73837e-27	0.247916	0.154	0.068	MGE	ELAVL1	CTX	Macaque	2.03184e-15	3
2.01865e-22	0.247915	0.267	0.157	MGE	LSM14A	CTX	Macaque	6.89136e-17	3
6.12e-24	0.24436	0.21	0.112	MGE	SMIM7	CTX	Macaque	2.26776e-17	3
1.37196e-18	0.243969	0.172	0.095	MGE	RAB5A	CTX	Macaque	3.50223e-11	3
1.23058e-18	0.243478	0.327	0.215	MGE	SRSF4	CTX	Macaque	6.01186e-15	3
1.50062e-22	0.242044	0.275	0.162	MGE	GTF2A2	CTX	Macaque	3.81393e-17	3
4.54464e-24	0.240931	0.269	0.154	MGE	PFDN1	CTX	Macaque	3.91074e-20	3
3.67819e-17	0.240014	0.101	0.047	MGE	VPS4B	CTX	Macaque	1.53307e-12	3
3.83509e-13	0.240002	0.112	0.061	MGE	PPP1R18	CTX	Macaque	1.81848e-09	3
3.23657e-20	0.23928	0.23	0.134	MGE	TMCO1	CTX	Macaque	5.5005e-14	3
1.21612e-19	0.238654	0.189	0.105	MGE	PHC2	CTX	Macaque	2.27055e-15	3
4.36632e-17	0.236806	0.146	0.078	MGE	RSRC1	CTX	Macaque	1.26411e-11	3
6.93657e-16	0.236169	0.139	0.076	MGE	PPM1L	CTX	Macaque	7.71708e-11	3
7.69495e-20	0.235717	0.164	0.086	MGE	CETN3	CTX	Macaque	2.8653e-13	3
8.29193e-18	0.235421	0.102	0.046	MGE	CEP68	CTX	Macaque	2.74055e-13	3
1.26736e-19	0.235183	0.303	0.191	MGE	SREK1	CTX	Macaque	4.8167e-14	3
2.6912e-18	0.234077	0.124	0.061	MGE	TSN	CTX	Macaque	3.5764e-13	3
3.96788e-22	0.233062	0.132	0.06	MGE	MAGOH	CTX	Macaque	1.05297e-14	3
1.59722e-21	0.231956	0.461	0.313	MGE	PSMB1	CTX	Macaque	3.51911e-17	3
4.93276e-19	0.231383	0.272	0.169	MGE	CTCF	CTX	Macaque	2.94101e-14	3
1.31385e-19	0.230586	0.549	0.39	MGE	PAK2	CTX	Macaque	6.30362e-16	3
7.37437e-14	0.230107	0.132	0.075	MGE	RAB30	CTX	Macaque	4.59759e-10	3
2.0857e-16	0.230092	0.14	0.075	MGE	DHX30	CTX	Macaque	5.75584e-11	3
1.50104e-16	0.22549	0.229	0.141	MGE	MRPL11	CTX	Macaque	7.10905e-13	3
5.70118e-18	0.224638	0.19	0.109	MGE	ARF6	CTX	Macaque	3.16497e-13	3
6.58716e-61	0.592926	0.104	0.011	MGE	SOX8	CTX	Macaque	9.95981e-51	2
2.43707e-56	0.540527	0.104	0.014	MGE	MYO3A	CTX	Macaque	1.34431e-46	2
3.34027e-25	0.380478	0.1	0.036	MGE	CHML	CTX	Macaque	2.37126e-21	2
5.35187e-24	0.317498	0.102	0.038	MGE	FBLN1	CTX	Macaque	4.25603e-20	2
3.72368e-23	0.294888	0.102	0.039	MGE	GLTP	CTX	Macaque	1.34314e-15	2
2.58001e-19	0.289775	0.102	0.044	MGE	MAML2	CTX	Macaque	1.34706e-14	2
2.24023e-25	0.285998	0.197	0.102	MGE	FOS	CTX	Macaque	1.59036e-21	2
1.97131e-24	0.266073	0.101	0.037	MGE	UXT	CTX	Macaque	2.15596e-16	2
4.77728e-20	0.262102	0.101	0.042	MGE	SEZ6	CTX	Macaque	3.55865e-16	2
3.45031e-23	0.262027	0.135	0.06	MGE	PRDX6	CTX	Macaque	3.41311e-18	2
4.56853e-20	0.259142	0.11	0.049	MGE	MLXIP	CTX	Macaque	2.2628e-15	2
5.12175e-21	0.257284	0.575	0.41	MGE	TRA2A	CTX	Macaque	3.6587e-17	2
5.3323e-18	0.257235	0.197	0.115	MGE	YAF2	CTX	Macaque	3.7854e-14	2
2.69571e-17	0.256782	0.205	0.123	MGE	SPATS2	CTX	Macaque	2.74796e-12	2
4.22139e-23	0.253389	0.521	0.355	MGE	HSBP1	CTX	Macaque	2.99677e-19	2
7.96144e-18	0.252547	0.147	0.078	MGE	AGPAT4	CTX	Macaque	1.85891e-10	2
7.97372e-20	0.252384	0.122	0.057	MGE	CALU	CTX	Macaque	7.22031e-14	2
1.08386e-19	0.252228	0.138	0.068	MGE	NRAS	CTX	Macaque	1.88909e-12	2
2.07825e-15	0.251838	0.158	0.091	MGE	NOL4	CTX	Macaque	2.59853e-11	2
5.762e-24	0.251838	0.461	0.303	MGE	PGRMC1	CTX	Macaque	6.96167e-20	2
1.76096e-18	0.250863	0.188	0.107	MGE	THUMPD1	CTX	Macaque	7.54524e-14	2
3.1811e-23	0.250105	0.26	0.151	MGE	TXNL1	CTX	Macaque	1.24501e-18	2
1.96313e-22	0.249285	0.19	0.1	MGE	MAF1	CTX	Macaque	1.20221e-12	2
9.80167e-24	0.247549	0.249	0.14	MGE	DCTN6	CTX	Macaque	1.25471e-19	2
4.39181e-20	0.246774	0.236	0.139	MGE	FAM32A	CTX	Macaque	3.14526e-16	2
1.19026e-15	0.246189	0.134	0.073	MGE	SLK	CTX	Macaque	1.05848e-11	2
5.5206e-18	0.246061	0.104	0.047	MGE	WDR1	CTX	Macaque	7.65496e-14	2
3.15549e-17	0.245463	0.223	0.136	MGE	SETD5	CTX	Macaque	2.24083e-13	2
1.67853e-19	0.244826	0.105	0.045	MGE	PCBD1	CTX	Macaque	1.30543e-15	2
6.66377e-28	0.243315	0.295	0.165	MGE	PAIP1	CTX	Macaque	1.16567e-16	2
4.41154e-13	0.242396	0.102	0.054	MGE	MTMR6	CTX	Macaque	3.13175e-09	2
7.95666e-19	0.242139	0.122	0.058	MGE	COX17	CTX	Macaque	3.33452e-14	2
7.34809e-13	0.24071	0.126	0.073	MGE	WDR45B	CTX	Macaque	5.22142e-09	2
4.06906e-20	0.240299	0.12	0.055	MGE	EXOC4	CTX	Macaque	4.01526e-13	2
1.14201e-16	0.23998	0.847	0.733	MGE	MAP2	CTX	Macaque	8.11927e-13	2
6.55973e-17	0.239216	0.153	0.083	MGE	BNIP3	CTX	Macaque	4.66312e-13	2
3.62859e-18	0.239159	0.201	0.116	MGE	MRPL33	CTX	Macaque	2.57628e-14	2
4.66983e-19	0.23805	0.127	0.062	MGE	PCNT	CTX	Macaque	1.9341e-13	2
3.02331e-21	0.237949	0.404	0.265	MGE	ARF1	CTX	Macaque	2.87729e-17	2
7.5925e-17	0.237805	0.117	0.058	MGE	RNF13	CTX	Macaque	1.30408e-10	2
8.65675e-21	0.237747	0.44	0.301	MGE	SPAG9	CTX	Macaque	2.40752e-16	2
5.13268e-18	0.237557	0.116	0.056	MGE	CD2BP2	CTX	Macaque	3.73453e-14	2
4.86598e-17	0.233854	0.133	0.069	MGE	SPCS3	CTX	Macaque	3.48014e-13	2
1.37128e-18	0.233118	0.185	0.103	MGE	LDHA	CTX	Macaque	1.94986e-14	2
1.58854e-14	0.232787	0.102	0.052	MGE	GPR137C	CTX	Macaque	1.1711e-10	2
1.62758e-16	0.231077	0.183	0.107	MGE	MAP4K5	CTX	Macaque	1.22155e-12	2
3.24009e-18	0.229846	0.102	0.045	MGE	PIGF	CTX	Macaque	9.00325e-12	2
2.45458e-18	0.229054	0.377	0.256	MGE	YWHAH	CTX	Macaque	1.89244e-14	2
2.16185e-15	0.228246	0.136	0.074	MGE	AKAP12	CTX	Macaque	1.5368e-11	2
1.74623e-15	0.227949	0.115	0.058	MGE	MED17	CTX	Macaque	6.51852e-09	2
5.19746e-20	0.227494	0.555	0.395	MGE	FUS	CTX	Macaque	1.38926e-15	2
3.5456e-14	0.225519	0.107	0.056	MGE	TM9SF2	CTX	Macaque	8.31046e-10	2
1.29001e-18	0.225433	0.287	0.182	MGE	AFF4	CTX	Macaque	1.13141e-14	2
1.13091e-30	0.411997	0.1	0.03	MGE	AKNA	CTX	Macaque	1.60566e-26	1
1.68844e-16	0.295494	0.1	0.047	MGE	BROX	CTX	Macaque	2.39725e-12	1
1.58797e-15	0.28114	0.101	0.049	MGE	NKAIN3	CTX	Macaque	2.2546e-11	1
1.35371e-17	0.269543	0.136	0.071	MGE	SNAPC3	CTX	Macaque	1.92199e-13	1
2.80615e-20	0.263849	0.239	0.142	MGE	BEND5	CTX	Macaque	3.98418e-16	1
1.05957e-20	0.256923	0.255	0.154	MGE	AKT3	CTX	Macaque	1.50438e-16	1
8.22949e-23	0.256812	0.249	0.144	MGE	BCL7A	CTX	Macaque	1.16842e-18	1
3.60135e-19	0.256184	0.131	0.064	MGE	PHKB	CTX	Macaque	5.11319e-15	1
1.09128e-19	0.256143	0.126	0.06	MGE	FGFR1OP2	CTX	Macaque	1.5494e-15	1
2.83772e-23	0.255925	0.26	0.15	MGE	CPSF6	CTX	Macaque	4.02899e-19	1
1.04061e-15	0.254321	0.134	0.072	MGE	STK4	CTX	Macaque	1.47746e-11	1
2.37731e-18	0.253608	0.241	0.148	MGE	TCEAL7	CTX	Macaque	3.37531e-14	1
4.07091e-20	0.248855	0.1	0.041	MGE	PTAR1	CTX	Macaque	5.77987e-16	1
2.07732e-26	0.24812	0.337	0.201	MGE	PPP1CC	CTX	Macaque	2.94938e-22	1
8.58677e-16	0.246483	0.136	0.074	MGE	NAA16	CTX	Macaque	1.21915e-11	1
4.65482e-17	0.246449	0.103	0.048	MGE	TMEM222	CTX	Macaque	6.60891e-13	1
4.67995e-17	0.24633	0.236	0.147	MGE	BIRC2	CTX	Macaque	6.64459e-13	1
8.26922e-17	0.244715	0.218	0.134	MGE	OLFM1	CTX	Macaque	1.17406e-12	1
3.80505e-19	0.243444	0.226	0.134	MGE	ZNF618	CTX	Macaque	5.40241e-15	1
1.66534e-16	0.242673	0.11	0.054	MGE	TMEM219	CTX	Macaque	2.36444e-12	1
6.57869e-18	0.242535	0.144	0.075	MGE	BCCIP	CTX	Macaque	9.34042e-14	1
2.68076e-16	0.24201	0.128	0.067	MGE	ZBTB33	CTX	Macaque	3.80614e-12	1
8.02297e-24	0.240945	0.224	0.122	MGE	PKM	CTX	Macaque	1.1391e-19	1
2.01065e-12	0.240634	0.137	0.081	MGE	TLE3	CTX	Macaque	2.85473e-08	1
1.69448e-16	0.240249	0.102	0.048	MGE	ZFAND2A	CTX	Macaque	2.40583e-12	1
1.17359e-18	0.239399	0.219	0.129	MGE	RBM22	CTX	Macaque	1.66626e-14	1
2.24636e-21	0.239364	0.515	0.357	MGE	BCLAF1	CTX	Macaque	3.18938e-17	1
6.12519e-18	0.239311	0.484	0.351	MGE	PBX1	CTX	Macaque	8.69655e-14	1
4.37038e-18	0.23882	0.129	0.065	MGE	ECHS1	CTX	Macaque	6.20506e-14	1
2.2154e-19	0.238669	0.174	0.094	MGE	STX12	CTX	Macaque	3.14542e-15	1
9.40782e-23	0.238575	0.45	0.302	MGE	FUBP1	CTX	Macaque	1.33572e-18	1
2.24593e-19	0.238011	0.233	0.138	MGE	EIF3G	CTX	Macaque	3.18877e-15	1
1.32344e-19	0.237508	0.296	0.188	MGE	PANK3	CTX	Macaque	1.87902e-15	1
1.58841e-17	0.237339	0.12	0.059	MGE	MAP3K13	CTX	Macaque	2.25522e-13	1
3.01954e-15	0.237151	0.143	0.08	MGE	CTR9	CTX	Macaque	4.28714e-11	1
4.87237e-12	0.236726	0.118	0.067	MGE	IFT88	CTX	Macaque	6.9178e-08	1
9.19162e-21	0.236158	0.393	0.259	MGE	GPX4	CTX	Macaque	1.30503e-16	1
7.79367e-17	0.235664	0.126	0.064	MGE	NHSL1	CTX	Macaque	1.10655e-12	1
1.32945e-19	0.234534	0.374	0.25	MGE	ZFAND5	CTX	Macaque	1.88756e-15	1
3.8198e-24	0.234311	0.354	0.219	MGE	DCTN2	CTX	Macaque	5.42336e-20	1
1.23109e-15	0.233578	0.111	0.055	MGE	TATDN1	CTX	Macaque	1.7479e-11	1
2.87553e-15	0.233305	0.236	0.152	MGE	CLK1	CTX	Macaque	4.08268e-11	1
1.55093e-17	0.233214	0.129	0.066	MGE	UBE2A	CTX	Macaque	2.20202e-13	1
3.51809e-19	0.233056	0.177	0.097	MGE	OSBPL11	CTX	Macaque	4.99499e-15	1
9.29474e-16	0.232969	0.128	0.068	MGE	AQR	CTX	Macaque	1.31967e-11	1
3.3837e-17	0.232676	0.18	0.103	MGE	UBQLN2	CTX	Macaque	4.80418e-13	1
3.83038e-21	0.232622	0.381	0.248	MGE	RBM8A	CTX	Macaque	5.43838e-17	1
1.08949e-23	0.232212	0.525	0.361	MGE	HNRNPD	CTX	Macaque	1.54686e-19	1
6.92014e-18	0.231962	0.129	0.065	MGE	NOVA2	CTX	Macaque	9.82522e-14	1
2.08435e-16	0.231768	0.141	0.076	MGE	ARHGAP12	CTX	Macaque	2.95936e-12	1
1.18365e-18	0.23129	0.303	0.196	MGE	MAP2K2	CTX	Macaque	1.68054e-14	1
6.13239e-18	0.231158	0.125	0.062	MGE	FAF2	CTX	Macaque	8.70677e-14	1
1.67944e-14	0.230747	0.108	0.056	MGE	RALGAPA2	CTX	Macaque	2.38447e-10	1
1.11544e-14	0.230579	0.137	0.077	MGE	TRMT10C	CTX	Macaque	1.58371e-10	1
1.10179e-11	0.229752	0.105	0.058	MGE	KIAA1958	CTX	Macaque	1.56432e-07	1
1.11222e-17	0.229409	0.266	0.169	MGE	PNPLA8	CTX	Macaque	1.57913e-13	1
4.66825e-19	0.229378	0.101	0.044	MGE	EMC3	CTX	Macaque	6.62799e-15	1
2.64622e-22	0.229316	0.228	0.127	MGE	STAG2	CTX	Macaque	3.7571e-18	1
8.42046e-18	0.22925	0.156	0.084	MGE	HMGA1	CTX	Macaque	1.19554e-13	1
3.71691e-21	0.229226	0.189	0.102	MGE	HSPA9	CTX	Macaque	5.27727e-17	1
3.06875e-25	0.228871	0.581	0.4	MGE	SMARCA5	CTX	Macaque	4.35701e-21	1
1.6947e-21	0.228814	0.279	0.168	MGE	SF1	CTX	Macaque	2.40613e-17	1
1.00599e-13	0.227889	0.105	0.055	MGE	NFKBIA	CTX	Macaque	1.42831e-09	1
6.05818e-17	0.227508	0.201	0.119	MGE	MOB4	CTX	Macaque	8.6014e-13	1
1.62817e-18	0.22721	0.148	0.077	MGE	RRM1	CTX	Macaque	2.31167e-14	1
9.65211e-15	0.226724	0.135	0.075	MGE	ATP2C1	CTX	Macaque	1.37041e-10	1
2.41705e-14	0.226596	0.162	0.096	MGE	CTTNBP2NL	CTX	Macaque	3.43173e-10	1
9.81475e-16	0.226497	0.234	0.149	MGE	ETNK1	CTX	Macaque	1.3935e-11	1
1.36647e-13	0.226494	0.155	0.093	MGE	FIP1L1	CTX	Macaque	1.94012e-09	1
2.2988e-18	0.226488	0.226	0.136	MGE	KIAA0232	CTX	Macaque	3.26384e-14	1
6.05893e-15	0.226462	0.112	0.058	MGE	UBL3	CTX	Macaque	8.60246e-11	1
9.75737e-18	0.226359	0.318	0.208	MGE	TPGS2	CTX	Macaque	1.38535e-13	1
5.4101e-23	0.225816	0.285	0.17	MGE	RALA	CTX	Macaque	7.68126e-19	1
4.11585e-16	0.225586	0.1	0.047	MGE	TRAM1	CTX	Macaque	5.84368e-12	1
4.7407e-15	0.225582	0.152	0.087	MGE	PCF11	CTX	Macaque	6.73084e-11	1
9.81082e-16	0.225341	0.13	0.069	MGE	MIA3	CTX	Macaque	1.39294e-11	1
1.82971e-18	0.224767	0.101	0.045	MGE	DDHD2	CTX	Macaque	2.59782e-14	1
1.25824e-13	0.224698	0.234	0.155	MGE	CDKN1B	CTX	Macaque	1.78644e-09	1
8.45861e-15	0.224549	0.146	0.083	MGE	ARIH2	CTX	Macaque	1.20095e-10	1
2.1354e-14	0.224457	0.113	0.059	MGE	ANXA5	CTX	Macaque	3.03183e-10	1
2.40064e-20	0.223881	0.439	0.299	MGE	TAF7	CTX	Macaque	3.40843e-16	1
2.28933e-19	0.223776	0.175	0.095	MGE	RAB22A	CTX	Macaque	3.25038e-15	1
2.03911e-21	0.223736	0.361	0.23	MGE	EIF3E	CTX	Macaque	2.89512e-17	1
1.17198e-20	0.223613	0.524	0.375	MGE	NDUFB2	CTX	Macaque	1.66397e-16	1
4.58376e-22	0.223186	0.381	0.245	MGE	SRSF10	CTX	Macaque	6.50802e-18	1
2.8488e-186	0.916074	0.8	0.447	LGE	EEF1G	LGE	Macaque	2.1916e-154	100
7.84208e-134	0.78862	0.804	0.664	LGE	SOX2	LGE	Macaque	3.40669e-110	100
2.9771e-56	0.74538	0.4	0.228	LGE	TMEFF1	LGE	Macaque	9.04547e-42	100
3.01843e-37	0.695191	0.262	0.141	LGE	KIAA0408	LGE	Macaque	1.50988e-30	100
3.56375e-67	0.675421	0.509	0.302	LGE	TUBA1B	LGE	Macaque	4.74963e-52	100
3.60274e-28	0.620649	0.268	0.163	LGE	PCDHAC2	LGE	Macaque	1.11337e-20	100
1.2381e-26	0.590149	0.24	0.14	LGE	GNG10	LGE	Macaque	6.67894e-21	100
4.23851e-33	0.581738	0.28	0.163	LGE	SOGA3	LGE	Macaque	4.89915e-19	100
1.10538e-56	0.575385	0.675	0.62	LGE	HNRNPA1	LGE	Macaque	3.62989e-32	100
2.98772e-36	0.556877	0.505	0.402	LGE	PAIP2	LGE	Macaque	5.72743e-22	100
5.91308e-49	0.556846	0.445	0.278	LGE	WDR83OS	LGE	Macaque	2.47406e-24	100
5.29472e-36	0.549085	0.32	0.192	LGE	NGRN	LGE	Macaque	2.4202e-18	100
3.74249e-38	0.536708	0.3	0.166	LGE	PCBP1	LGE	Macaque	3.29698e-17	100
7.7777e-27	0.531587	0.265	0.166	LGE	MRPL53	LGE	Macaque	4.68205e-11	100
5.48977e-26	0.519922	0.186	0.098	LGE	SERF1A	LGE	Macaque	2.68764e-11	100
6.89608e-37	0.510186	0.687	0.652	LGE	BTG1	LGE	Macaque	4.29278e-22	100
1.06008e-22	0.506522	0.185	0.103	LGE	GNS	LGE	Macaque	1.02675e-09	100
1.11265e-31	0.505789	0.369	0.24	LGE	RNASEK	LGE	Macaque	4.93621e-17	100
5.48241e-19	0.502545	0.153	0.085	LGE	THTPA	LGE	Macaque	1.78355e-10	100
1.92148e-52	0.496449	0.548	0.383	LGE	MATR3	LGE	Macaque	3.04443e-26	100
1.44592e-14	0.494416	0.299	0.236	LGE	IPO9	LGE	Macaque	9.11581e-06	100
2.09707e-32	0.492763	0.692	0.65	LGE	RUNX1T1	LGE	Macaque	4.90715e-17	100
2.30712e-23	0.487149	0.483	0.416	LGE	CELF4	LGE	Macaque	1.34803e-12	100
1.25784e-17	0.481606	0.173	0.102	LGE	PTP4A1	LGE	Macaque	1.48616e-12	100
3.92882e-16	0.475156	0.115	0.06	LGE	MAGED4B	LGE	Macaque	7.56039e-09	100
2.9551e-10	0.470012	0.339	0.301	LGE	SOX5	LGE	Macaque	1.30656e-05	100
4.25618e-15	0.466445	0.22	0.155	LGE	FAM210B	LGE	Macaque	0.00018269	100
1.24952e-16	0.465089	0.203	0.131	LGE	IDS	LGE	Macaque	1.46217e-10	100
5.82368e-28	0.452737	0.691	0.645	LGE	ZNF704	LGE	Macaque	8.27662e-26	100
4.25003e-20	0.440675	0.214	0.132	LGE	SARNP	LGE	Macaque	1.92869e-10	100
4.36955e-24	0.427672	0.315	0.208	LGE	U2AF1	LGE	Macaque	2.04662e-12	100
5.99603e-19	0.421835	0.274	0.184	LGE	HYPK	LGE	Macaque	1.06496e-08	100
6.23948e-22	0.421602	0.279	0.179	LGE	ATP6V0C	LGE	Macaque	3.59024e-11	100
4.79569e-13	0.420688	0.372	0.318	LGE	EPHA5	LGE	Macaque	0.000364086	100
2.65432e-16	0.419137	0.414	0.342	LGE	CHD2	LGE	Macaque	5.82235e-07	100
5.30309e-13	0.419105	0.131	0.078	LGE	ZNF286A	LGE	Macaque	1.62874e-06	100
9.11505e-11	0.403836	0.175	0.123	LGE	NDUFA7	LGE	Macaque	0.000195581	100
1.11013e-26	0.401235	0.746	0.73	LGE	DPYSL3	LGE	Macaque	2.79749e-23	100
1.8469e-19	0.380086	0.476	0.413	LGE	GTF2I	LGE	Macaque	4.34434e-06	100
2.8869e-12	0.378187	0.294	0.229	LGE	NFIX	LGE	Macaque	7.71638e-05	100
2.48974e-15	0.373491	0.186	0.12	LGE	PAM16	LGE	Macaque	4.22683e-05	100
1.25247e-49	0.35793	0.778	0.587	LGE	UBB	LGE	Macaque	3.65979e-35	100
2.80374e-12	0.349129	0.17	0.111	LGE	COMMD3	LGE	Macaque	0.000106847	100
2.06682e-31	0.325754	0.852	0.834	LGE	DCX	LGE	Macaque	2.63895e-17	100
2.63595e-14	0.325151	0.596	0.572	LGE	PLS3	LGE	Macaque	1.638e-06	100
5.58083e-18	0.320118	0.474	0.374	LGE	ARRDC3	LGE	Macaque	7.36184e-07	100
9.96827e-19	0.312766	0.621	0.588	LGE	CEP170	LGE	Macaque	1.25423e-08	100
4.8737e-20	0.271353	0.755	0.74	LGE	MLLT11	LGE	Macaque	1.00489e-10	100
4.47798e-12	0.447942	0.151	0.099	LGE	SIAH3	LGE	Macaque	4.52769e-05	99
1.14757e-07	0.390685	0.271	0.226	LGE	RBBP4	LGE	Macaque	0.000936867	99
3.15249e-12	0.389601	0.133	0.083	LGE	DSCAML1	LGE	Macaque	0.000650107	99
9.41892e-13	0.327503	0.113	0.064	LGE	ARL2BP	LGE	Macaque	0.00121979	99
3.39949e-21	0.321973	0.447	0.335	LGE	NRXN1	LGE	Macaque	2.07598e-15	99
3.13787e-08	0.345433	0.153	0.107	LGE	NPDC1	LGE	Macaque	0.000118894	98
1.89217e-09	0.323137	0.404	0.362	LGE	EIF4A1	LGE	Macaque	0.00130399	98
1.24317e-10	0.379117	0.134	0.087	LGE	WSB2	LGE	Macaque	0.00107123	97
1.10134e-08	0.369326	0.147	0.104	LGE	APC2	LGE	Macaque	0.000471324	97
4.89423e-08	0.351895	0.118	0.078	LGE	SPECC1L	LGE	Macaque	0.000801225	97
2.86689e-12	0.346192	0.571	0.56	LGE	SMARCA5	LGE	Macaque	0.000604738	97
1.32604e-11	0.310255	0.603	0.593	LGE	SP9	LGE	Macaque	0.00191458	96
2.0092e-09	0.302589	0.215	0.159	LGE	MZT2B	LGE	Macaque	0.0013835	96
5.44998e-07	0.428628	0.232	0.196	LGE	PRDX1	LGE	Macaque	0.00159338	95
7.08988e-12	0.381387	0.149	0.096	LGE	AK1	LGE	Macaque	0.000629327	95
2.90779e-11	0.380052	0.227	0.161	LGE	CRABP1	LGE	Macaque	0.000707703	95
2.18575e-10	0.344281	0.133	0.086	LGE	LAMP3	LGE	Macaque	0.00115985	95
2.91583e-10	0.285468	0.564	0.551	LGE	FNBP1L	LGE	Macaque	0.0015377	95
8.73918e-09	0.278372	0.622	0.652	LGE	IFI27L2	LGE	Macaque	0.00340415	93
6.10872e-14	0.406952	0.16	0.102	LGE	PGM2L1	LGE	Macaque	0.00243438	92
1.15594e-09	0.355004	0.11	0.07	LGE	ARMC10	LGE	Macaque	0.0029412	92
2.98682e-09	0.411234	0.247	0.199	LGE	RSRP1	LGE	Macaque	0.000711315	91
5.79342e-08	0.329408	0.225	0.178	LGE	TMSB15B	LGE	Macaque	0.00351136	91
1.46054e-07	0.282212	0.622	0.612	LGE	NFIB	LGE	Macaque	0.00130149	91
1.77948e-10	0.294998	0.129	0.083	LGE	POLR2K	LGE	Macaque	0.00487966	90
1.96989e-11	0.315512	0.434	0.391	LGE	KLC1	LGE	Macaque	0.001887	89
5.4159e-08	0.38613	0.212	0.17	LGE	TIAM2	LGE	Macaque	0.00513076	84
1.24829e-09	0.383902	0.18	0.132	LGE	ARL9	LGE	Macaque	0.0032185	84
6.02763e-09	0.336219	0.335	0.29	LGE	PRRC2B	LGE	Macaque	0.00418163	81
1.47524e-11	0.249927	0.62	0.633	LGE	DYNC1I2	LGE	Macaque	0.00110984	81
5.1259e-11	0.352139	0.395	0.353	LGE	POU3F2	LGE	Macaque	0.00443745	80
1.13734e-08	0.335777	0.189	0.143	LGE	COX16	LGE	Macaque	0.00494554	79
3.05968e-07	0.35946	0.33	0.298	LGE	ZC2HC1A	LGE	Macaque	0.00634815	78
2.36308e-09	0.306729	0.112	0.071	LGE	MAZ	LGE	Macaque	0.00571447	77
4.90271e-08	0.279829	0.124	0.084	LGE	TRAPPC5	LGE	Macaque	0.00577942	77
4.06391e-09	0.379212	0.194	0.147	LGE	SYT5	LGE	Macaque	0.00477341	76
2.02387e-06	0.339101	0.487	0.494	LGE	DLX5	LGE	Macaque	0.00785654	76
1.84081e-09	0.335913	0.104	0.065	LGE	PIK3R2	LGE	Macaque	0.00120661	75
2.45078e-14	0.264459	0.574	0.503	LGE	RTN1	LGE	Macaque	1.13651e-06	73
6.77159e-08	0.329819	0.148	0.107	LGE	TOMM5	LGE	Macaque	0.0093848	71
3.2667e-09	0.29589	0.138	0.093	LGE	DIABLO	LGE	Macaque	0.010608	65
6.66159e-13	0.247559	0.723	0.747	LGE	NREP	LGE	Macaque	4.4635e-09	64
8.77665e-08	0.312427	0.132	0.093	LGE	CDK11B	LGE	Macaque	0.00997817	62
2.89512e-09	0.320227	0.323	0.279	LGE	MEX3B	LGE	Macaque	0.0093019	61
1.78164e-09	0.309968	0.162	0.113	LGE	APOE	LGE	Macaque	0.00708796	60
2.30324e-06	0.326717	0.13	0.096	LGE	SPINT2	LGE	Macaque	0.0102732	56
9.47081e-21	0.245219	0.833	0.835	LGE	MAP2	LGE	Macaque	3.38195e-12	56
2.88587e-08	0.350122	0.201	0.157	LGE	PTPRS	LGE	Macaque	0.00768616	52
2.1741e-11	0.340982	0.385	0.339	LGE	ARL4D	LGE	Macaque	0.00981255	52
6.51968e-08	0.321155	0.101	0.066	LGE	RBFA	LGE	Macaque	0.00441611	52
2.40248e-06	0.262357	0.417	0.392	LGE	MIF	LGE	Macaque	0.0110683	51
1.18355e-09	0.331648	0.208	0.157	LGE	PDZRN4	LGE	Macaque	0.0093146	49
2.815e-08	0.283744	0.116	0.077	LGE	EMC6	LGE	Macaque	0.00766785	48
2.98138e-06	0.317057	0.121	0.088	LGE	ZNF770	LGE	Macaque	0.0132988	46
1.42499e-07	0.351506	0.122	0.086	LGE	ZNF471	LGE	Macaque	0.00811194	43
8.75349e-07	0.349408	0.347	0.321	LGE	CCNG2	LGE	Macaque	0.0112464	43
2.54851e-10	0.354526	0.149	0.102	LGE	RANBP2	LGE	Macaque	0.00391778	42
1.68306e-08	0.263419	0.488	0.473	LGE	DCLK1	LGE	Macaque	0.00678394	42
5.14296e-08	0.419866	0.275	0.239	LGE	PTBP3	LGE	Macaque	0.0116813	41
5.13718e-08	0.406572	0.135	0.097	LGE	SCN9A	LGE	Macaque	0.00878126	39
6.69528e-07	0.296839	0.104	0.071	LGE	TMBIM4	LGE	Macaque	0.00943604	37
7.29162e-12	0.363669	0.108	0.063	LGE	CTNND1	LGE	Macaque	0.000133506	35
1.53813e-09	0.326338	0.267	0.221	LGE	SCHIP1	LGE	Macaque	0.0112778	34
1.97996e-08	0.258041	0.234	0.18	LGE	NUDT4	LGE	Macaque	0.000500499	32
2.2651e-07	0.377594	0.173	0.134	LGE	RIMKLB	LGE	Macaque	0.00945506	29
1.74695e-09	0.392337	0.214	0.169	LGE	CUX2	LGE	Macaque	0.0111433	28
5.91414e-08	0.336612	0.366	0.34	LGE	SMARCE1	LGE	Macaque	0.00961707	28
6.5921e-07	0.362704	0.115	0.082	LGE	ACO2	LGE	Macaque	0.00882291	27
2.54243e-07	0.261296	0.545	0.528	LGE	DST	LGE	Macaque	0.0103409	27
4.17892e-11	0.349192	0.103	0.06	LGE	NT5C2	LGE	Macaque	0.000969144	26
6.61085e-08	0.254657	0.243	0.19	LGE	NME2	LGE	Macaque	0.00227012	26
4.64388e-08	0.345431	0.21	0.165	LGE	DDX39B	LGE	Macaque	0.0123046	25
3.52433e-07	0.264516	0.109	0.074	LGE	ALDOA	LGE	Macaque	0.00809953	25
7.15452e-10	0.415344	0.197	0.15	LGE	KLF6	LGE	Macaque	0.0142364	24
3.9172e-08	0.241748	0.644	0.674	LGE	TOMM7	LGE	Macaque	0.000397562	24
1.35649e-07	0.319624	0.415	0.391	LGE	NRXN3	LGE	Macaque	0.0136515	21
2.6707e-06	0.312466	0.164	0.127	LGE	RPP21	LGE	Macaque	0.0158035	21
1.18613e-06	0.274046	0.531	0.55	LGE	TRA2A	LGE	Macaque	0.0141008	21
1.08302e-06	0.373753	0.121	0.088	LGE	VTI1A	LGE	Macaque	0.0136301	18
3.95596e-08	0.308571	0.119	0.081	LGE	PDCD6	LGE	Macaque	0.0107687	18
5.43499e-07	0.300166	0.151	0.112	LGE	SH3BP5	LGE	Macaque	0.00853925	18
2.96308e-06	0.364622	0.159	0.126	LGE	NUMA1	LGE	Macaque	0.0164052	17
6.89221e-11	0.306361	0.445	0.414	LGE	TRIM2	LGE	Macaque	0.0170587	17
4.72244e-07	0.385391	0.183	0.147	LGE	YPEL1	LGE	Macaque	0.0165529	14
6.11459e-08	0.315176	0.101	0.066	LGE	SNX29	LGE	Macaque	0.00166197	13
1.39649e-15	0.237407	0.764	0.772	LGE	RTN4	LGE	Macaque	5.09334e-08	12
2.19468e-07	0.234868	0.623	0.637	LGE	NCAM1	LGE	Macaque	0.00573372	12
9.19727e-07	0.306164	0.248	0.208	LGE	HSPE1	LGE	Macaque	0.0138712	10
1.55917e-06	0.278089	0.537	0.547	LGE	POU3F3	LGE	Macaque	0.0094389	9
2.78528e-17	0.230725	0.843	0.871	LGE	CALM2	LGE	Macaque	3.7017e-12	8
1.0698e-07	0.319678	0.114	0.078	LGE	PRKRA	LGE	Macaque	0.0135397	7
3.09946e-06	0.31491	0.171	0.134	LGE	SRSF9	LGE	Macaque	0.0221271	7
1.59219e-09	0.232509	0.71	0.741	LGE	DDX17	LGE	Macaque	6.3348e-06	7
8.65581e-07	0.346605	0.275	0.243	LGE	LUC7L2	LGE	Macaque	0.0160351	6
1.17219e-07	0.322013	0.117	0.081	LGE	CRBN	LGE	Macaque	0.0165063	6
3.13585e-07	0.286871	0.496	0.495	LGE	SOX1	LGE	Macaque	0.0226282	6
6.02357e-07	0.248963	0.112	0.078	LGE	FKBP2	LGE	Macaque	0.030029	6
3.28048e-36	0.231178	0.984	0.983	LGE	TUBB2B	LGE	Macaque	4.95646e-30	6
1.32162e-06	0.357493	0.159	0.122	LGE	SLC25A29	LGE	Macaque	0.00688912	5
3.06612e-07	0.351958	0.315	0.283	LGE	CHD4	LGE	Macaque	0.0134616	5
1.66715e-06	0.350033	0.1	0.069	LGE	SAMD5	LGE	Macaque	0.0169539	5
8.63271e-08	0.349964	0.267	0.228	LGE	ZNF300	LGE	Macaque	0.015706	5
2.70417e-06	0.320993	0.174	0.138	LGE	PSMA6	LGE	Macaque	0.0328687	5
3.30061e-07	0.416757	0.185	0.149	LGE	PIK3R3	LGE	Macaque	0.0144185	4
8.93507e-07	0.406694	0.138	0.103	LGE	S100A10	LGE	Macaque	0.0117064	4
1.76159e-06	0.37319	0.23	0.194	LGE	TP53BP1	LGE	Macaque	0.0115213	4
2.11205e-06	0.370897	0.161	0.126	LGE	EPN2	LGE	Macaque	0.020648	4
3.2943e-06	0.358385	0.136	0.104	LGE	UBA6	LGE	Macaque	0.0165656	4
2.83418e-06	0.339171	0.168	0.134	LGE	FRG1	LGE	Macaque	0.0252285	4
2.06644e-07	0.317448	0.103	0.069	LGE	WDR6	LGE	Macaque	0.0226156	4
2.14873e-07	0.416102	0.184	0.147	LGE	MOB3B	LGE	Macaque	0.0148478	3
2.71781e-06	0.383301	0.151	0.12	LGE	VAT1	LGE	Macaque	0.0314673	3
1.08115e-09	0.366638	0.1	0.061	LGE	RAD50	LGE	Macaque	0.000572053	3
6.70027e-09	0.326087	0.469	0.454	LGE	PBX1	LGE	Macaque	0.0179777	3
6.26437e-07	0.324553	0.3	0.267	LGE	NCAN	LGE	Macaque	0.0285658	3
3.03574e-12	0.236102	0.666	0.676	LGE	COX4I1	LGE	Macaque	0.000129113	3
3.54887e-14	0.443105	0.1	0.052	LGE	CARM1	LGE	Macaque	2.52119e-10	2
5.31314e-07	0.364917	0.113	0.08	LGE	CDKAL1	LGE	Macaque	0.0129041	2
5.35802e-07	0.35818	0.176	0.138	LGE	TRIM36	LGE	Macaque	0.027293	2
2.98285e-06	0.356108	0.121	0.09	LGE	CDK4	LGE	Macaque	0.0272101	2
2.39517e-06	0.348496	0.111	0.079	LGE	ACVR1C	LGE	Macaque	0.0369011	2
1.82036e-07	0.411857	0.128	0.093	LGE	RFTN2	LGE	Macaque	0.00258454	1
1.32189e-08	0.407739	0.245	0.2	LGE	PDE4D	LGE	Macaque	0.000187682	1
5.60226e-07	0.381991	0.105	0.074	LGE	AIDA	LGE	Macaque	0.00795408	1
5.49605e-07	0.37149	0.17	0.133	LGE	LIMA1	LGE	Macaque	0.0078033	1
7.58855e-07	0.360836	0.135	0.1	LGE	SWT1	LGE	Macaque	0.0107742	1
3.5072e-06	0.353789	0.184	0.151	LGE	ZFP90	LGE	Macaque	0.0497952	1
2.96815e-06	0.344357	0.147	0.113	LGE	RBM27	LGE	Macaque	0.0421418	1
1.5155e-06	0.342215	0.284	0.25	LGE	IRF2BP2	LGE	Macaque	0.0215171	1
2.40268e-06	0.340907	0.147	0.112	LGE	SMIM18	LGE	Macaque	0.0341132	1
8.90683e-07	0.339507	0.179	0.142	LGE	ANKIB1	LGE	Macaque	0.0126459	1
1.01593e-06	0.337105	0.149	0.113	LGE	PROX1	LGE	Macaque	0.0144241	1
1.12945e-09	0.335292	0.1	0.06	LGE	GOLGA7	LGE	Macaque	1.60359e-05	1
2.43789e-11	0.333592	0.1	0.057	LGE	ZNF625	LGE	Macaque	3.46131e-07	1
9.58837e-07	0.329725	0.112	0.08	LGE	TRAK2	LGE	Macaque	0.0136136	1
9.54626e-08	0.324996	0.109	0.074	LGE	TOB1	LGE	Macaque	0.00135538	1
1.08188e-06	0.324095	0.418	0.41	LGE	CDH2	LGE	Macaque	0.0153605	1
2.38276e-06	0.257132	0.191	0.242	LGE	NPY	LGE	Macaque	0.0338304	1
3.67739e-07	0.256857	0.102	0.068	LGE	NUDT3	LGE	Macaque	0.00522116	1
4.02231e-07	0.253416	0.562	0.554	LGE	SYNE2	LGE	Macaque	0.00571088	1
3.76289e-07	0.226057	0.574	0.571	LGE	TSC22D1	LGE	Macaque	0.00534255	1
0	2.52269	0.446	0.043	MGE	SLC25A6	LGE	Macaque	4.69918e-296	100
6.69907e-276	1.95367	0.379	0.032	MGE	COX7C	LGE	Macaque	3.83695e-250	100
6.50383e-262	1.82113	0.374	0.035	MGE	CHCHD2	LGE	Macaque	6.60925e-230	100
3.11523e-31	1.7665	0.143	0.06	MGE	HSPA1A	LGE	Macaque	5.48805e-24	100
5.76442e-148	1.67691	0.669	0.495	MGE	EEF1A1	LGE	Macaque	7.75129e-124	100
2.2074e-163	1.49767	0.538	0.252	MGE	BCL11A	LGE	Macaque	1.50194e-136	100
9.80452e-166	1.27782	0.26	0.026	MGE	TIMM8B	LGE	Macaque	6.86044e-145	100
3.05979e-145	1.15204	0.497	0.205	MGE	ATP6V1G1	LGE	Macaque	1.39925e-118	100
4.95173e-111	1.09158	0.321	0.097	MGE	SLC38A2	LGE	Macaque	8.10983e-82	100
1.82743e-17	1.07496	0.169	0.1	MGE	DNAJB1	LGE	Macaque	1.76328e-10	100
7.14628e-19	1.0511	0.137	0.073	MGE	HSPB1	LGE	Macaque	6.17287e-08	100
2.81089e-66	0.916202	0.41	0.222	MGE	TMEM123	LGE	Macaque	1.34048e-49	100
4.19103e-97	0.912735	0.232	0.053	MGE	CD99	LGE	Macaque	8.85391e-79	100
1.76595e-118	0.901448	0.362	0.113	MGE	SUMO1	LGE	Macaque	5.2589e-92	100
3.11479e-99	0.855076	0.17	0.02	MGE	MGRN1	LGE	Macaque	3.46608e-81	100
1.06034e-90	0.852493	0.155	0.017	MGE	SOX9	LGE	Macaque	5.48855e-78	100
2.4513e-79	0.821735	0.539	0.321	MGE	ELAVL3	LGE	Macaque	4.16113e-62	100
1.09728e-83	0.814221	0.278	0.091	MGE	TCF3	LGE	Macaque	6.13917e-61	100
5.76016e-66	0.766726	0.129	0.02	MGE	ITGB8	LGE	Macaque	1.8855e-42	100
2.97193e-82	0.735772	0.329	0.124	MGE	PEBP1	LGE	Macaque	9.39998e-62	100
5.11264e-50	0.734584	0.206	0.078	MGE	PEG10	LGE	Macaque	3.69056e-41	100
6.21423e-80	0.73435	0.245	0.073	MGE	PPIA	LGE	Macaque	1.58128e-53	100
3.44486e-81	0.720727	0.46	0.228	MGE	DNAJB6	LGE	Macaque	1.23373e-61	100
1.40935e-55	0.719344	0.229	0.087	MGE	EFNA5	LGE	Macaque	2.47748e-33	100
2.11424e-78	0.699437	0.342	0.137	MGE	MAP1LC3B	LGE	Macaque	2.66879e-53	100
1.54881e-20	0.659601	0.122	0.057	MGE	CENPF	LGE	Macaque	3.64676e-08	100
1.83463e-34	0.658133	0.925	0.877	MGE	HSP90AA1	LGE	Macaque	1.01607e-25	100
3.21694e-80	0.657733	0.532	0.291	MGE	CIRBP	LGE	Macaque	1.70668e-56	100
7.01092e-68	0.657228	0.717	0.548	MGE	SFPQ	LGE	Macaque	1.89049e-50	100
2.87242e-74	0.655656	0.146	0.023	MGE	FUNDC2	LGE	Macaque	6.79474e-54	100
2.04585e-58	0.652112	0.228	0.082	MGE	RAP2B	LGE	Macaque	1.39949e-38	100
1.3271e-56	0.6473	0.752	0.648	MGE	TPT1	LGE	Macaque	2.15142e-38	100
3.80942e-27	0.630058	0.575	0.457	MGE	USP22	LGE	Macaque	3.60815e-18	100
1.5994e-55	0.622187	0.167	0.048	MGE	ST8SIA4	LGE	Macaque	4.30583e-36	100
2.32227e-58	0.604877	0.127	0.023	MGE	SEC22B	LGE	Macaque	8.4133e-47	100
9.08531e-56	0.603141	0.252	0.099	MGE	RC3H1	LGE	Macaque	1.78655e-34	100
1.24661e-29	0.590646	0.133	0.052	MGE	PTTG1	LGE	Macaque	1.28991e-18	100
2.22309e-58	0.558147	0.12	0.02	MGE	NOVA2	LGE	Macaque	1.33448e-43	100
2.21874e-40	0.553057	0.443	0.274	MGE	HTATSF1	LGE	Macaque	2.6264e-28	100
2.23542e-46	0.552527	0.153	0.047	MGE	HPS3	LGE	Macaque	2.91292e-28	100
8.82197e-68	0.548227	0.159	0.033	MGE	MPC1	LGE	Macaque	1.08449e-40	100
1.22277e-28	0.531586	0.179	0.085	MGE	TLE1	LGE	Macaque	3.15401e-20	100
1.60173e-07	0.52995	0.206	0.155	MGE	RHOB	LGE	Macaque	0.00011964	100
2.76066e-61	0.520316	0.138	0.027	MGE	EIF4E	LGE	Macaque	5.21024e-37	100
2.15802e-81	0.518293	0.86	0.756	MGE	HNRNPDL	LGE	Macaque	6.12392e-41	100
2.56287e-44	0.518228	0.287	0.136	MGE	YTHDF2	LGE	Macaque	1.02375e-32	100
1.12256e-26	0.517086	0.762	0.674	MGE	HMGB1	LGE	Macaque	1.77099e-15	100
7.29464e-45	0.513194	0.451	0.266	MGE	NPM1	LGE	Macaque	1.59513e-32	100
6.46601e-50	0.512874	0.309	0.145	MGE	SLC38A1	LGE	Macaque	1.35354e-30	100
8.80102e-44	0.511329	0.155	0.05	MGE	MDM2	LGE	Macaque	5.69274e-29	100
4.11584e-20	0.501073	0.191	0.111	MGE	HSPH1	LGE	Macaque	1.32656e-11	100
1.58829e-58	0.500995	0.114	0.017	MGE	SNRPC	LGE	Macaque	5.73835e-39	100
2.53096e-41	0.491996	0.282	0.14	MGE	MEST	LGE	Macaque	1.9463e-25	100
1.71832e-40	0.48844	0.132	0.04	MGE	PHLPP1	LGE	Macaque	5.63616e-30	100
1.97138e-49	0.487432	0.263	0.113	MGE	GNB1	LGE	Macaque	2.59247e-30	100
1.66495e-42	0.485431	0.354	0.191	MGE	NKX2-1	LGE	Macaque	2.36344e-25	100
1.16138e-46	0.483886	0.294	0.137	MGE	KANSL1	LGE	Macaque	4.89099e-31	100
5.44452e-42	0.482953	0.17	0.062	MGE	GLG1	LGE	Macaque	1.49004e-27	100
7.40717e-33	0.481733	0.179	0.08	MGE	RPA3	LGE	Macaque	2.02846e-17	100
1.11786e-49	0.47835	0.363	0.184	MGE	TPM4	LGE	Macaque	1.16512e-32	100
9.52973e-38	0.474462	0.352	0.197	MGE	ZNF207	LGE	Macaque	3.53283e-22	100
5.32395e-45	0.470171	0.439	0.252	MGE	RBM3	LGE	Macaque	2.75086e-30	100
2.72129e-54	0.464727	0.192	0.063	MGE	UQCRC2	LGE	Macaque	8.60206e-32	100
1.55862e-38	0.46172	0.14	0.046	MGE	TOX	LGE	Macaque	1.22352e-25	100
3.13083e-38	0.460107	0.232	0.107	MGE	SCD5	LGE	Macaque	2.07857e-21	100
4.42672e-37	0.457052	0.345	0.195	MGE	TMPO	LGE	Macaque	1.17207e-18	100
4.2711e-40	0.45445	0.397	0.232	MGE	HSPA5	LGE	Macaque	5.77883e-21	100
4.80084e-51	0.453751	0.554	0.351	MGE	FUS	LGE	Macaque	1.20252e-30	100
1.07316e-35	0.452464	0.485	0.325	MGE	PPP1R14B	LGE	Macaque	5.57311e-20	100
1.87393e-39	0.450878	0.305	0.158	MGE	BRD4	LGE	Macaque	1.51665e-25	100
3.41409e-50	0.449232	0.982	0.969	MGE	ACTG1	LGE	Macaque	2.95041e-39	100
2.19344e-42	0.44655	0.824	0.723	MGE	UBC	LGE	Macaque	1.21475e-36	100
3.69121e-35	0.44508	0.156	0.06	MGE	HMGA1	LGE	Macaque	8.67005e-25	100
2.447e-20	0.441434	0.258	0.163	MGE	NFIA	LGE	Macaque	5.13846e-09	100
5.25066e-41	0.438852	0.392	0.221	MGE	PABPC1	LGE	Macaque	3.07155e-21	100
1.14599e-35	0.43761	0.341	0.192	MGE	OLA1	LGE	Macaque	7.38851e-24	100
1.08112e-40	0.431961	0.342	0.181	MGE	CAMK2N1	LGE	Macaque	3.33555e-24	100
2.18239e-32	0.430515	0.276	0.145	MGE	BNIP3L	LGE	Macaque	2.84475e-26	100
5.7086e-39	0.430395	0.27	0.133	MGE	ANP32A	LGE	Macaque	8.81374e-23	100
1.53747e-36	0.42264	0.227	0.105	MGE	TOMM22	LGE	Macaque	2.71156e-20	100
4.74579e-26	0.422317	0.395	0.253	MGE	DLX6	LGE	Macaque	4.78181e-21	100
1.49197e-28	0.421808	0.125	0.047	MGE	RBM15B	LGE	Macaque	5.44824e-26	100
8.77485e-33	0.419937	0.354	0.206	MGE	SPTBN1	LGE	Macaque	2.54065e-18	100
3.495e-32	0.413256	0.159	0.065	MGE	EIF2S3	LGE	Macaque	5.14955e-22	100
7.75669e-32	0.413218	0.147	0.058	MGE	ASCL1	LGE	Macaque	3.81498e-16	100
1.4123e-27	0.406638	0.173	0.08	MGE	CST3	LGE	Macaque	3.3416e-16	100
1.5973e-23	0.398762	0.214	0.118	MGE	CBLB	LGE	Macaque	2.16993e-14	100
2.61851e-40	0.398303	0.126	0.037	MGE	SLC35E2B	LGE	Macaque	2.63324e-22	100
9.81813e-33	0.397201	0.138	0.051	MGE	RRP36	LGE	Macaque	6.26338e-24	100
7.5893e-28	0.39719	0.182	0.087	MGE	ZNF362	LGE	Macaque	5.8558e-17	100
9.89395e-38	0.395619	0.163	0.061	MGE	LSM12	LGE	Macaque	3.10235e-23	100
2.87973e-33	0.394754	0.161	0.065	MGE	FBXW7	LGE	Macaque	7.52918e-19	100
4.42291e-35	0.394719	0.291	0.153	MGE	PSMD11	LGE	Macaque	1.20515e-19	100
5.75612e-43	0.392983	0.123	0.032	MGE	IGF1R	LGE	Macaque	6.99818e-25	100
7.97011e-17	0.390636	0.163	0.093	MGE	SMC4	LGE	Macaque	2.01637e-07	100
1.28935e-37	0.389699	0.628	0.447	MGE	COX7A2	LGE	Macaque	9.13959e-23	100
7.84798e-24	0.38953	0.208	0.114	MGE	CADPS	LGE	Macaque	1.09263e-11	100
1.42397e-37	0.385521	0.456	0.271	MGE	SAP18	LGE	Macaque	1.01046e-24	100
5.68458e-30	0.38549	0.632	0.477	MGE	FOXG1	LGE	Macaque	1.48438e-12	100
2.51637e-35	0.382229	0.309	0.166	MGE	TBCA	LGE	Macaque	6.06311e-22	100
1.66437e-30	0.381197	0.146	0.059	MGE	CPE	LGE	Macaque	4.36747e-18	100
5.7255e-33	0.380853	0.424	0.261	MGE	DDX24	LGE	Macaque	2.20557e-22	100
1.90237e-24	0.380375	0.286	0.169	MGE	GATAD2B	LGE	Macaque	4.43667e-19	100
3.65372e-35	0.379146	0.205	0.092	MGE	KCNQ2	LGE	Macaque	3.65235e-19	100
4.41199e-31	0.377849	0.803	0.693	MGE	FTL	LGE	Macaque	8.79604e-14	100
7.34663e-39	0.372893	0.296	0.152	MGE	SERINC1	LGE	Macaque	1.27243e-18	100
2.03408e-32	0.370752	0.28	0.15	MGE	RNPS1	LGE	Macaque	1.42976e-18	100
3.60276e-36	0.369058	0.153	0.057	MGE	HSPA13	LGE	Macaque	5.45993e-18	100
2.55768e-36	0.367071	0.143	0.051	MGE	PSD3	LGE	Macaque	1.50095e-18	100
2.94076e-31	0.366794	0.522	0.361	MGE	TRA2B	LGE	Macaque	1.61125e-19	100
1.66025e-26	0.365127	0.46	0.306	MGE	BZW1	LGE	Macaque	4.27675e-17	100
4.3563e-38	0.363456	0.137	0.045	MGE	PTBP1	LGE	Macaque	4.11596e-23	100
7.36895e-18	0.35925	0.305	0.198	MGE	AUTS2	LGE	Macaque	1.09728e-15	100
3.00941e-21	0.358398	0.429	0.309	MGE	ERBB4	LGE	Macaque	7.27535e-12	100
1.04499e-29	0.356996	0.117	0.041	MGE	SMIM15	LGE	Macaque	1.57574e-21	100
9.33698e-32	0.355491	0.74	0.598	MGE	FTH1	LGE	Macaque	1.64261e-19	100
1.52134e-31	0.354859	0.582	0.42	MGE	YWHAG	LGE	Macaque	1.52929e-16	100
1.84967e-30	0.350746	0.787	0.679	MGE	SUMO2	LGE	Macaque	2.26481e-20	100
4.27471e-22	0.350461	0.379	0.252	MGE	CACYBP	LGE	Macaque	8.58565e-13	100
1.51397e-29	0.350451	0.777	0.671	MGE	BASP1	LGE	Macaque	3.12861e-11	100
1.94946e-12	0.348441	0.168	0.105	MGE	CHORDC1	LGE	Macaque	1.9006e-08	100
2.65975e-34	0.344003	0.577	0.399	MGE	EIF1B	LGE	Macaque	2.89088e-18	100
5.40763e-34	0.342082	0.546	0.37	MGE	ARGLU1	LGE	Macaque	6.6844e-17	100
1.01724e-23	0.339107	0.437	0.302	MGE	HSP90B1	LGE	Macaque	7.28434e-13	100
1.23045e-25	0.33888	0.214	0.113	MGE	FHL1	LGE	Macaque	4.52231e-14	100
1.83576e-21	0.333812	0.642	0.495	MGE	HNRNPH1	LGE	Macaque	4.91674e-17	100
7.03758e-25	0.333285	0.379	0.242	MGE	CALR	LGE	Macaque	3.48677e-16	100
1.07146e-26	0.331873	0.303	0.177	MGE	ENY2	LGE	Macaque	2.1118e-16	100
2.60092e-27	0.33138	0.607	0.447	MGE	SRRM2	LGE	Macaque	9.09228e-18	100
4.91832e-30	0.324661	0.665	0.513	MGE	KHDRBS1	LGE	Macaque	1.57818e-16	100
1.85043e-38	0.323407	0.193	0.08	MGE	ALDH7A1	LGE	Macaque	9.50358e-16	100
1.43624e-18	0.316186	0.623	0.5	MGE	DCLK2	LGE	Macaque	2.74042e-08	100
1.26597e-23	0.310804	0.129	0.056	MGE	LITAF	LGE	Macaque	6.8033e-17	100
3.62598e-26	0.303578	0.269	0.151	MGE	UBE2L3	LGE	Macaque	6.56938e-15	100
1.3763e-25	0.298284	0.454	0.293	MGE	PSMA7	LGE	Macaque	3.94929e-17	100
1.17837e-21	0.270101	0.734	0.59	MGE	YWHAE	LGE	Macaque	1.03439e-10	100
1.10193e-51	0.488648	0.116	0.023	MGE	UGCG	LGE	Macaque	1.43354e-32	99
9.20554e-26	0.349172	0.127	0.052	MGE	POU3F1	LGE	Macaque	5.96111e-13	99
1.44717e-24	0.341814	0.192	0.098	MGE	FZD3	LGE	Macaque	6.7173e-17	99
6.25053e-29	0.337663	0.283	0.158	MGE	CDV3	LGE	Macaque	1.02633e-13	99
3.00446e-30	0.325887	0.227	0.114	MGE	EP300	LGE	Macaque	2.01717e-16	99
5.39611e-30	0.321512	0.137	0.053	MGE	CHMP3	LGE	Macaque	1.90152e-16	99
3.50639e-20	0.317176	0.159	0.081	MGE	SLC35B1	LGE	Macaque	2.61075e-15	99
3.45544e-27	0.303499	0.409	0.265	MGE	CBX3	LGE	Macaque	2.44143e-12	99
1.71304e-33	0.299837	0.566	0.375	MGE	NDUFA4	LGE	Macaque	2.28487e-17	99
1.60757e-25	0.293293	0.656	0.506	MGE	SET	LGE	Macaque	4.09879e-14	99
1.96177e-30	0.28142	0.897	0.816	MGE	EIF1	LGE	Macaque	1.42162e-18	99
2.4773e-29	0.305047	0.144	0.058	MGE	MED30	LGE	Macaque	2.00537e-18	98
1.12698e-29	0.303191	0.464	0.299	MGE	SRSF5	LGE	Macaque	8.88944e-17	98
1.13105e-27	0.317308	0.191	0.093	MGE	ZKSCAN1	LGE	Macaque	7.62611e-13	97
2.66896e-37	0.308158	0.164	0.063	MGE	PAICS	LGE	Macaque	2.7781e-16	97
9.76067e-22	0.295058	0.122	0.054	MGE	RRP1B	LGE	Macaque	1.42138e-12	97
2.5407e-28	0.290322	0.318	0.186	MGE	MAP2K2	LGE	Macaque	2.64428e-12	97
1.98864e-20	0.320873	0.115	0.051	MGE	PCDH10	LGE	Macaque	6.5506e-15	96
1.13096e-21	0.297364	0.24	0.137	MGE	RBM5	LGE	Macaque	2.54774e-15	96
1.03526e-26	0.295511	0.226	0.12	MGE	CAPZA1	LGE	Macaque	1.20709e-13	96
2.3803e-20	0.293244	0.182	0.099	MGE	NME1	LGE	Macaque	2.53677e-12	96
1.74156e-28	0.288554	0.131	0.051	MGE	LDHB	LGE	Macaque	1.16607e-14	96
1.23815e-23	0.279137	0.487	0.329	MGE	DSTN	LGE	Macaque	1.50826e-15	96
1.00033e-23	0.375471	0.111	0.045	MGE	TGFB2	LGE	Macaque	2.32175e-12	95
4.94744e-24	0.314693	0.149	0.07	MGE	CSRP2	LGE	Macaque	1.71485e-15	95
6.60829e-26	0.303533	0.254	0.145	MGE	IGFBP2	LGE	Macaque	8.24693e-10	95
4.17905e-31	0.297867	0.412	0.248	MGE	ARF1	LGE	Macaque	8.5257e-16	95
2.38546e-21	0.296259	0.198	0.108	MGE	BCL7C	LGE	Macaque	2.61332e-12	95
6.04828e-24	0.295828	0.394	0.256	MGE	NOVA1	LGE	Macaque	2.10425e-14	95
1.55665e-22	0.293996	0.336	0.212	MGE	KDM6B	LGE	Macaque	4.281e-11	95
1.14733e-22	0.291842	0.188	0.099	MGE	MDM4	LGE	Macaque	1.30429e-12	95
3.23339e-18	0.288264	0.445	0.322	MGE	PPP1CB	LGE	Macaque	4.47041e-10	95
5.28921e-23	0.29624	0.222	0.122	MGE	UQCRFS1	LGE	Macaque	3.36112e-16	94
2.10124e-22	0.290073	0.152	0.074	MGE	EPM2AIP1	LGE	Macaque	3.21771e-13	94
8.39464e-25	0.279994	0.54	0.37	MGE	CCT2	LGE	Macaque	6.22486e-14	94
2.14416e-15	0.268406	0.888	0.815	MGE	HSP90AB1	LGE	Macaque	1.80215e-07	94
2.42871e-32	0.342461	0.109	0.034	MGE	LIN7C	LGE	Macaque	2.43821e-17	93
4.37257e-15	0.299551	0.275	0.181	MGE	ENC1	LGE	Macaque	2.14284e-12	93
4.13642e-22	0.28887	0.366	0.232	MGE	ATG12	LGE	Macaque	3.06289e-14	93
1.35213e-18	0.296141	0.192	0.107	MGE	MIEN1	LGE	Macaque	2.06938e-13	92
6.48164e-23	0.282649	0.349	0.227	MGE	DEK	LGE	Macaque	1.54606e-10	92
1.18225e-18	0.293059	0.378	0.259	MGE	ERH	LGE	Macaque	4.72647e-12	91
2.00085e-19	0.298868	0.158	0.083	MGE	CDO1	LGE	Macaque	9.86529e-13	90
7.1896e-21	0.282565	0.217	0.124	MGE	R3HDM2	LGE	Macaque	3.26495e-12	90
1.17882e-17	0.281344	0.34	0.23	MGE	MYO1B	LGE	Macaque	1.61002e-08	90
5.61065e-19	0.287815	0.279	0.175	MGE	CTNNB1	LGE	Macaque	9.42927e-14	88
2.76832e-22	0.284252	0.136	0.063	MGE	RBSN	LGE	Macaque	2.32048e-13	88
2.67752e-23	0.275148	0.232	0.13	MGE	CUL3	LGE	Macaque	1.8265e-11	88
1.04777e-16	0.283565	0.16	0.089	MGE	GLOD4	LGE	Macaque	2.38408e-10	87
1.63011e-22	0.276028	0.278	0.168	MGE	KDM5A	LGE	Macaque	4.38882e-12	87
3.50794e-09	0.629531	0.184	0.133	MGE	HMGB2	LGE	Macaque	0.00529097	86
1.53132e-20	0.280732	0.119	0.054	MGE	NHSL1	LGE	Macaque	6.96304e-12	85
7.0813e-23	0.274066	0.263	0.151	MGE	TXNL1	LGE	Macaque	8.31551e-15	85
2.51417e-23	0.281393	0.12	0.051	MGE	MED23	LGE	Macaque	1.02074e-14	83
1.14181e-20	0.275381	0.166	0.086	MGE	SPG7	LGE	Macaque	5.79775e-12	83
2.37907e-20	0.274888	0.453	0.309	MGE	PSMB1	LGE	Macaque	2.267e-13	83
3.86665e-22	0.278607	0.195	0.105	MGE	SNN	LGE	Macaque	4.36541e-13	82
2.73948e-20	0.27515	0.138	0.066	MGE	PTRHD1	LGE	Macaque	6.55181e-13	82
1.50718e-26	0.270849	0.223	0.118	MGE	SRGAP1	LGE	Macaque	5.87636e-10	82
7.71935e-24	0.279139	0.189	0.097	MGE	PHACTR4	LGE	Macaque	1.15932e-14	81
1.35566e-23	0.277789	0.337	0.21	MGE	ELF2	LGE	Macaque	2.95759e-13	81
3.98066e-28	0.276187	0.289	0.162	MGE	SP3	LGE	Macaque	3.18293e-14	81
6.74511e-27	0.27477	0.106	0.037	MGE	PHB2	LGE	Macaque	1.70131e-17	81
6.13991e-22	0.273734	0.182	0.094	MGE	HSPA9	LGE	Macaque	6.91079e-16	81
1.31702e-19	0.273652	0.257	0.156	MGE	CPSF6	LGE	Macaque	1.87704e-12	81
3.02611e-23	0.272503	0.29	0.173	MGE	MTPN	LGE	Macaque	1.20089e-12	81
7.44757e-16	0.269036	0.502	0.387	MGE	CKB	LGE	Macaque	3.70772e-06	81
5.0734e-21	0.271822	0.181	0.097	MGE	SSU72	LGE	Macaque	8.41221e-12	80
6.46528e-20	0.27874	0.149	0.075	MGE	RAP1A	LGE	Macaque	2.37788e-14	78
6.07161e-17	0.269505	0.138	0.072	MGE	TIMM50	LGE	Macaque	4.08508e-13	78
3.03652e-18	0.266784	0.329	0.215	MGE	EIF4B	LGE	Macaque	2.67759e-13	78
1.14224e-20	0.26363	0.215	0.12	MGE	MDH2	LGE	Macaque	3.98074e-15	78
2.05345e-20	0.274513	0.348	0.225	MGE	GLCCI1	LGE	Macaque	2.41315e-12	77
2.76802e-25	0.270161	0.343	0.212	MGE	WSB1	LGE	Macaque	6.89807e-12	77
4.3199e-19	0.270157	0.241	0.142	MGE	RBM33	LGE	Macaque	6.5575e-15	77
1.3873e-24	0.266896	0.413	0.268	MGE	DDX6	LGE	Macaque	4.38645e-12	77
4.2258e-19	0.263248	0.341	0.222	MGE	ENAH	LGE	Macaque	1.72115e-12	77
4.96677e-18	0.250754	0.663	0.537	MGE	HNRNPA0	LGE	Macaque	2.39776e-12	77
3.6014e-31	0.273921	0.287	0.154	MGE	STRAP	LGE	Macaque	7.60319e-15	76
9.55701e-25	0.259605	0.119	0.048	MGE	WDR82	LGE	Macaque	3.37215e-13	76
1.54248e-20	0.277655	0.223	0.128	MGE	ETNK1	LGE	Macaque	1.61859e-12	75
1.35808e-18	0.271686	0.119	0.056	MGE	RNF165	LGE	Macaque	1.20141e-13	75
7.49803e-17	0.270903	0.216	0.131	MGE	PTTG1IP	LGE	Macaque	3.0917e-13	75
6.66416e-14	0.264858	0.527	0.412	MGE	SOX6	LGE	Macaque	5.25603e-10	75
1.0127e-18	0.26462	0.483	0.346	MGE	SLC25A3	LGE	Macaque	3.25907e-13	75
6.01765e-22	0.273157	0.151	0.073	MGE	LEPROTL1	LGE	Macaque	1.48979e-13	74
4.93818e-21	0.268357	0.156	0.079	MGE	MSI1	LGE	Macaque	1.6446e-09	74
6.37955e-20	0.261997	0.118	0.053	MGE	MAP3K13	LGE	Macaque	2.50516e-13	74
1.13823e-29	0.259443	0.15	0.062	MGE	ELAVL1	LGE	Macaque	1.93224e-15	74
9.35375e-28	0.266681	0.116	0.042	MGE	TMEM97	LGE	Macaque	1.7817e-15	73
1.26353e-26	0.263534	0.283	0.16	MGE	UBE2R2	LGE	Macaque	1.65442e-13	73
2.12485e-22	0.264504	0.517	0.362	MGE	UBE2I	LGE	Macaque	2.75122e-14	72
9.60816e-22	0.261623	0.26	0.154	MGE	RHOBTB3	LGE	Macaque	3.15271e-12	72
6.02967e-26	0.270268	0.168	0.08	MGE	SLC25A5	LGE	Macaque	1.03432e-11	69
4.81324e-20	0.258358	0.282	0.171	MGE	WTAP	LGE	Macaque	2.51003e-12	69
1.89753e-23	0.267901	0.169	0.084	MGE	COMMD9	LGE	Macaque	2.44434e-12	68
1.46862e-22	0.267702	0.225	0.125	MGE	MTCH1	LGE	Macaque	1.0426e-13	68
2.54225e-20	0.264101	0.138	0.067	MGE	OXA1L	LGE	Macaque	1.46308e-12	67
2.62997e-24	0.263638	0.483	0.326	MGE	ILF3	LGE	Macaque	1.86531e-13	67
2.50359e-20	0.261907	0.394	0.262	MGE	UQCRQ	LGE	Macaque	9.21014e-14	66
2.2387e-20	0.257866	0.181	0.098	MGE	KIAA1549	LGE	Macaque	1.70094e-12	66
8.68689e-21	0.268762	0.243	0.142	MGE	ZNF326	LGE	Macaque	8.11952e-13	65
3.13636e-20	0.302767	0.11	0.048	MGE	RNF168	LGE	Macaque	1.29075e-13	64
2.89746e-19	0.267566	0.177	0.096	MGE	CYCS	LGE	Macaque	2.13054e-11	64
1.94439e-21	0.264497	0.129	0.059	MGE	SSR3	LGE	Macaque	3.41142e-15	63
7.43694e-17	0.264677	0.137	0.072	MGE	PPM1L	LGE	Macaque	8.73434e-11	62
1.66742e-17	0.264004	0.175	0.098	MGE	FARP1	LGE	Macaque	9.62975e-11	62
9.19132e-21	0.262279	0.211	0.118	MGE	KRR1	LGE	Macaque	8.65193e-12	62
1.09911e-19	0.25646	0.486	0.344	MGE	CSDE1	LGE	Macaque	7.09325e-14	61
1.86916e-23	0.254691	0.438	0.286	MGE	MYL12B	LGE	Macaque	6.69692e-14	61
4.51643e-23	0.263859	0.216	0.117	MGE	PSMC6	LGE	Macaque	2.01762e-14	60
4.31749e-23	0.261707	0.286	0.17	MGE	SEC11C	LGE	Macaque	1.24809e-12	60
2.45258e-16	0.265039	0.194	0.115	MGE	USP7	LGE	Macaque	8.85709e-11	59
3.22061e-16	0.25981	0.136	0.072	MGE	PPP1R2	LGE	Macaque	4.91907e-13	59
7.58813e-26	0.25996	0.414	0.263	MGE	SEC61B	LGE	Macaque	1.73638e-14	58
3.52861e-21	0.252916	0.142	0.068	MGE	PRPF38A	LGE	Macaque	4.48591e-14	58
8.45716e-20	0.253346	0.243	0.144	MGE	SUGT1	LGE	Macaque	8.39778e-12	57
4.7876e-19	0.259941	0.173	0.094	MGE	RAF1	LGE	Macaque	1.82036e-12	56
3.30935e-22	0.256401	0.137	0.063	MGE	P4HB	LGE	Macaque	8.95294e-14	55
6.50776e-23	0.261961	0.223	0.123	MGE	RAB5C	LGE	Macaque	3.3689e-12	54
2.85952e-23	0.257798	0.474	0.329	MGE	HNRNPAB	LGE	Macaque	3.53915e-11	54
9.30444e-25	0.255279	0.213	0.113	MGE	PKM	LGE	Macaque	1.01808e-12	53
1.96107e-27	0.268151	0.253	0.138	MGE	TIAM1	LGE	Macaque	6.02996e-15	52
1.38199e-29	0.253115	0.528	0.351	MGE	APEX1	LGE	Macaque	5.70352e-14	52
3.28932e-30	0.371501	0.102	0.032	MGE	TTL	LGE	Macaque	1.21654e-20	51
2.06222e-22	0.251339	0.277	0.163	MGE	MKRN1	LGE	Macaque	7.12068e-14	49
2.74672e-20	0.256105	0.368	0.248	MGE	IGFBPL1	LGE	Macaque	3.13147e-11	48
3.38256e-20	0.248939	0.48	0.327	MGE	VDAC2	LGE	Macaque	1.43783e-14	48
4.55947e-09	0.288535	0.211	0.156	MGE	FOS	LGE	Macaque	0.00562406	47
1.26043e-22	0.255521	0.228	0.127	MGE	FAM32A	LGE	Macaque	1.26575e-13	47
4.66431e-21	0.261718	0.147	0.072	MGE	ZNF91	LGE	Macaque	9.50741e-12	46
2.11956e-21	0.256853	0.379	0.251	MGE	ARID1A	LGE	Macaque	4.86505e-13	45
4.86339e-19	0.25492	0.168	0.09	MGE	BOD1	LGE	Macaque	9.24563e-14	45
1.36441e-27	0.254536	0.224	0.116	MGE	IRS2	LGE	Macaque	9.03854e-13	45
2.43199e-18	0.262244	0.401	0.275	MGE	NDUFB1	LGE	Macaque	3.36714e-11	44
9.92963e-20	0.257723	0.3	0.187	MGE	NSA2	LGE	Macaque	2.36882e-15	44
4.1801e-21	0.254379	0.243	0.141	MGE	C1QBP	LGE	Macaque	5.41654e-12	44
4.27157e-17	0.243735	0.498	0.368	MGE	HNRNPC	LGE	Macaque	5.82783e-11	44
3.28672e-19	0.255998	0.201	0.113	MGE	PSMD6	LGE	Macaque	1.37486e-14	42
7.06446e-12	0.254631	0.181	0.118	MGE	ANP32E	LGE	Macaque	1.3476e-07	42
3.51468e-14	0.253857	0.145	0.084	MGE	ZNF776	LGE	Macaque	3.6746e-09	42
8.93849e-16	0.25131	0.156	0.088	MGE	ARPC4	LGE	Macaque	2.85406e-11	41
1.5112e-19	0.247179	0.264	0.16	MGE	TMEM50A	LGE	Macaque	5.45427e-13	41
6.07208e-23	0.267287	0.204	0.111	MGE	UBE2S	LGE	Macaque	4.18335e-11	40
4.97822e-15	0.254735	0.118	0.062	MGE	KITLG	LGE	Macaque	8.35123e-10	40
1.28803e-17	0.250726	0.258	0.161	MGE	CTCF	LGE	Macaque	1.84027e-12	39
5.30919e-20	0.247562	0.52	0.37	MGE	EIF3F	LGE	Macaque	5.2861e-13	39
6.35965e-17	0.250292	0.115	0.056	MGE	DNER	LGE	Macaque	5.70983e-09	38
8.58626e-24	0.262538	0.109	0.043	MGE	PCGF3	LGE	Macaque	1.21988e-12	37
5.76439e-21	0.24509	0.258	0.152	MGE	PFDN1	LGE	Macaque	8.34849e-15	37
1.1348e-17	0.241388	0.531	0.385	MGE	GABARAPL2	LGE	Macaque	1.49666e-12	37
3.32901e-17	0.401692	0.1	0.047	MGE	ARPP21	LGE	Macaque	1.25954e-12	36
2.83315e-09	0.252713	0.268	0.199	MGE	DUT	LGE	Macaque	0.000393621	36
5.00049e-22	0.2466	0.463	0.318	MGE	RBM25	LGE	Macaque	2.03334e-13	36
3.3933e-22	0.243642	0.502	0.351	MGE	TMA7	LGE	Macaque	3.28042e-13	36
3.17981e-20	0.243146	0.433	0.294	MGE	ARPC3	LGE	Macaque	1.19116e-14	36
9.05609e-17	0.249924	0.259	0.163	MGE	PHAX	LGE	Macaque	3.17483e-12	35
6.74247e-19	0.249248	0.5	0.359	MGE	RBMX	LGE	Macaque	5.02095e-15	34
4.32192e-17	0.245834	0.453	0.332	MGE	RAN	LGE	Macaque	3.1626e-08	34
3.80863e-18	0.256453	0.155	0.083	MGE	DDA1	LGE	Macaque	2.52294e-11	33
6.25712e-12	0.25632	0.155	0.097	MGE	TSPAN13	LGE	Macaque	2.00711e-07	33
1.1412e-22	0.255605	0.168	0.084	MGE	DNAJA2	LGE	Macaque	4.75485e-13	33
1.53688e-18	0.248376	0.286	0.18	MGE	RALY	LGE	Macaque	2.20004e-14	33
1.6265e-17	0.255724	0.364	0.244	MGE	SMARCB1	LGE	Macaque	5.99899e-13	32
1.22559e-16	0.255011	0.104	0.049	MGE	ZFP82	LGE	Macaque	6.82027e-11	32
1.70723e-15	0.254388	0.156	0.089	MGE	ACBD3	LGE	Macaque	1.07443e-10	32
7.70779e-20	0.253663	0.168	0.09	MGE	CDK13	LGE	Macaque	3.04746e-11	32
8.59126e-16	0.253307	0.231	0.145	MGE	RASAL2	LGE	Macaque	3.77458e-10	32
1.21679e-17	0.251485	0.21	0.124	MGE	RBM22	LGE	Macaque	1.35686e-11	32
4.01859e-18	0.247259	0.551	0.419	MGE	TBL1XR1	LGE	Macaque	2.84635e-09	32
2.00862e-09	0.292357	0.186	0.132	MGE	MEF2C	LGE	Macaque	0.0117642	31
6.10999e-18	0.25334	0.128	0.063	MGE	TSN	LGE	Macaque	5.18876e-12	31
2.40159e-14	0.301249	0.102	0.052	MGE	GABRA2	LGE	Macaque	2.43046e-07	30
1.05439e-17	0.255468	0.267	0.169	MGE	GHITM	LGE	Macaque	7.2416e-13	30
4.46849e-17	0.24731	0.264	0.172	MGE	ATP6V0B	LGE	Macaque	1.53043e-08	30
6.02623e-22	0.244551	0.445	0.3	MGE	UBE2E3	LGE	Macaque	1.4249e-12	30
1.45799e-19	0.259396	0.169	0.09	MGE	ECHDC1	LGE	Macaque	1.01533e-12	29
1.09497e-21	0.25749	0.178	0.092	MGE	MED10	LGE	Macaque	6.96592e-16	29
1.17947e-12	0.253081	0.144	0.085	MGE	FMR1	LGE	Macaque	8.13908e-08	29
5.88679e-19	0.250321	0.227	0.135	MGE	EIF3J	LGE	Macaque	1.39051e-10	29
1.28855e-19	0.249191	0.301	0.189	MGE	JTB	LGE	Macaque	3.92837e-13	29
7.94466e-17	0.262366	0.317	0.212	MGE	KIF5C	LGE	Macaque	1.26846e-08	28
2.7821e-23	0.257702	0.197	0.105	MGE	WNK3	LGE	Macaque	8.63108e-12	28
2.06743e-17	0.2441	0.157	0.085	MGE	SGCE	LGE	Macaque	7.83841e-12	28
1.22947e-06	0.312919	0.181	0.139	MGE	CHL1	LGE	Macaque	0.0124466	27
3.38783e-14	0.253175	0.285	0.194	MGE	HSPD1	LGE	Macaque	3.29472e-09	27
4.13808e-18	0.251403	0.515	0.366	MGE	SEC61G	LGE	Macaque	4.08508e-14	26
6.39012e-23	0.245599	0.179	0.091	MGE	TIMM17A	LGE	Macaque	3.04293e-13	26
9.35325e-18	0.255544	0.19	0.109	MGE	GNG4	LGE	Macaque	1.4791e-12	25
3.7799e-21	0.245336	0.448	0.296	MGE	CCT8	LGE	Macaque	5.34887e-14	25
4.93919e-22	0.243012	0.179	0.093	MGE	PCBP4	LGE	Macaque	2.41998e-12	25
1.61055e-15	0.242963	0.487	0.362	MGE	EIF5	LGE	Macaque	2.34516e-10	25
7.96374e-15	0.248374	0.159	0.092	MGE	CLTB	LGE	Macaque	4.29277e-09	24
1.52942e-17	0.251621	0.128	0.065	MGE	TRIB2	LGE	Macaque	9.28908e-11	23
7.96659e-17	0.251326	0.374	0.263	MGE	SETBP1	LGE	Macaque	3.12949e-08	23
5.97976e-18	0.247804	0.438	0.305	MGE	MYL6B	LGE	Macaque	5.20372e-12	23
1.1051e-15	0.246117	0.175	0.101	MGE	RND2	LGE	Macaque	4.30718e-09	23
5.45214e-15	0.240103	0.458	0.334	MGE	EPC1	LGE	Macaque	9.02395e-12	23
1.63205e-19	0.254715	0.28	0.175	MGE	GSTA4	LGE	Macaque	4.58657e-12	22
2.94576e-19	0.252325	0.167	0.089	MGE	GLRX3	LGE	Macaque	6.82307e-15	22
3.2365e-17	0.247502	0.318	0.21	MGE	TMEM167A	LGE	Macaque	4.97536e-13	22
6.69938e-19	0.2462	0.334	0.214	MGE	SPCS2	LGE	Macaque	2.25913e-15	22
2.6087e-16	0.244804	0.117	0.058	MGE	PSEN1	LGE	Macaque	1.50788e-11	22
1.085e-13	0.244713	0.673	0.566	MGE	GAD2	LGE	Macaque	6.55828e-09	22
2.51075e-20	0.243345	0.316	0.199	MGE	NDUFB8	LGE	Macaque	3.17203e-13	22
1.37695e-13	0.538314	0.103	0.055	MGE	EGR1	LGE	Macaque	2.38581e-07	21
9.75545e-15	0.253435	0.199	0.123	MGE	LBH	LGE	Macaque	4.22457e-10	21
4.89754e-20	0.249552	0.167	0.087	MGE	PSMC2	LGE	Macaque	2.57228e-12	21
1.69533e-22	0.248329	0.14	0.065	MGE	SPCS3	LGE	Macaque	1.29441e-13	21
1.04284e-17	0.245802	0.298	0.19	MGE	DPYSL4	LGE	Macaque	1.7703e-13	21
1.26985e-17	0.241272	0.109	0.051	MGE	ZKSCAN8	LGE	Macaque	2.01239e-12	21
2.56971e-11	0.250436	0.102	0.058	MGE	PCNA	LGE	Macaque	2.98847e-06	20
1.82511e-16	0.248417	0.167	0.094	MGE	TXN2	LGE	Macaque	6.16983e-11	20
3.27958e-20	0.247495	0.24	0.141	MGE	MYEF2	LGE	Macaque	2.78517e-14	20
5.62053e-20	0.252941	0.141	0.069	MGE	MAPK1IP1L	LGE	Macaque	1.29399e-15	19
1.37244e-14	0.250932	0.189	0.117	MGE	TFDP2	LGE	Macaque	1.36507e-06	19
7.67112e-18	0.244969	0.226	0.136	MGE	SSBP1	LGE	Macaque	5.65321e-13	19
7.65965e-19	0.244076	0.198	0.112	MGE	PSMD14	LGE	Macaque	4.50332e-12	19
8.02147e-20	0.241363	0.186	0.102	MGE	COPS5	LGE	Macaque	4.22984e-13	19
1.27463e-32	0.39441	0.103	0.03	MGE	MNS1	LGE	Macaque	1.35837e-20	18
3.31218e-24	0.317045	0.1	0.036	MGE	DLL1	LGE	Macaque	1.51365e-13	18
9.56918e-19	0.256342	0.212	0.124	MGE	SEC11A	LGE	Macaque	1.35763e-12	18
8.53186e-17	0.25009	0.183	0.105	MGE	MRPS30	LGE	Macaque	1.21697e-12	18
1.57883e-24	0.248069	0.388	0.246	MGE	TALDO1	LGE	Macaque	4.26173e-13	18
7.04747e-20	0.247534	0.162	0.084	MGE	DAZAP1	LGE	Macaque	9.79639e-15	18
1.44366e-20	0.244762	0.178	0.095	MGE	AASDHPPT	LGE	Macaque	1.46819e-11	18
3.11769e-18	0.243017	0.155	0.082	MGE	USE1	LGE	Macaque	1.94179e-11	18
1.09629e-18	0.241499	0.636	0.482	MGE	NDUFS5	LGE	Macaque	1.11731e-12	18
3.63522e-14	0.240758	0.128	0.07	MGE	RRP15	LGE	Macaque	1.02675e-09	18
6.28164e-20	0.240028	0.244	0.144	MGE	UQCRC1	LGE	Macaque	1.71666e-13	18
4.17237e-17	0.239445	0.152	0.083	MGE	NFAT5	LGE	Macaque	1.11671e-08	18
2.73206e-22	0.249929	0.162	0.08	MGE	PGD	LGE	Macaque	4.00285e-13	17
9.90847e-17	0.246613	0.285	0.186	MGE	CAMSAP1	LGE	Macaque	3.15707e-10	17
1.63525e-20	0.243853	0.124	0.057	MGE	FAF2	LGE	Macaque	4.94142e-13	17
8.97667e-18	0.241874	0.128	0.063	MGE	CNOT6	LGE	Macaque	1.404e-10	17
3.02056e-22	0.253335	0.41	0.269	MGE	TOMM20	LGE	Macaque	1.95849e-14	16
1.80982e-10	0.251565	0.168	0.111	MGE	DBI	LGE	Macaque	1.11858e-06	16
1.59859e-18	0.245653	0.13	0.064	MGE	RNASEH2B	LGE	Macaque	2.80498e-11	16
5.12988e-17	0.239722	0.184	0.105	MGE	SMNDC1	LGE	Macaque	9.93701e-13	16
5.9427e-16	0.238748	0.132	0.07	MGE	GMPS	LGE	Macaque	1.15961e-11	15
2.81818e-21	0.253305	0.235	0.134	MGE	MRPL57	LGE	Macaque	2.74257e-15	14
4.24035e-15	0.252903	0.122	0.064	MGE	EXT2	LGE	Macaque	1.03546e-10	14
9.01734e-17	0.245884	0.302	0.198	MGE	METAP2	LGE	Macaque	5.71725e-12	14
5.69471e-16	0.244841	0.173	0.1	MGE	FDPS	LGE	Macaque	5.86266e-12	14
1.2001e-19	0.242983	0.461	0.321	MGE	SRRM1	LGE	Macaque	2.93167e-13	14
1.01437e-16	0.242694	0.101	0.047	MGE	SNX27	LGE	Macaque	1.15585e-11	14
6.10939e-19	0.238267	0.55	0.405	MGE	DCTN3	LGE	Macaque	1.99769e-10	14
2.11696e-29	0.317739	0.102	0.033	MGE	AFF2	LGE	Macaque	2.38611e-14	13
9.99513e-18	0.25161	0.289	0.185	MGE	RALA	LGE	Macaque	2.67887e-14	13
1.9144e-20	0.249886	0.246	0.145	MGE	TSPAN3	LGE	Macaque	7.07615e-14	13
2.273e-17	0.247249	0.342	0.228	MGE	ATXN10	LGE	Macaque	1.93576e-12	13
3.25867e-18	0.245741	0.203	0.117	MGE	BCAS2	LGE	Macaque	5.13129e-14	13
4.43349e-20	0.244818	0.339	0.214	MGE	PSMB5	LGE	Macaque	5.01433e-14	13
8.91093e-10	0.244471	0.203	0.144	MGE	SNAP25	LGE	Macaque	1.93955e-06	13
7.47483e-15	0.242027	0.192	0.118	MGE	EIF2S2	LGE	Macaque	1.89769e-10	13
3.32265e-18	0.239984	0.133	0.066	MGE	EIF2S1	LGE	Macaque	1.21908e-11	13
3.42896e-17	0.237289	0.188	0.109	MGE	LRPPRC	LGE	Macaque	4.19349e-12	13
6.64031e-19	0.236878	0.497	0.35	MGE	SERBP1	LGE	Macaque	2.00012e-11	13
2.22104e-11	0.251989	0.196	0.132	MGE	NXPH1	LGE	Macaque	3.36109e-06	12
2.24788e-20	0.245963	0.164	0.084	MGE	CDKN2AIPNL	LGE	Macaque	1.59508e-13	12
3.91105e-19	0.243122	0.38	0.252	MGE	COPS6	LGE	Macaque	1.36874e-13	12
3.46576e-16	0.242733	0.194	0.117	MGE	MANF	LGE	Macaque	1.61736e-11	12
5.06681e-21	0.240667	0.244	0.142	MGE	DCTN6	LGE	Macaque	1.5589e-13	12
3.40597e-20	0.239878	0.383	0.253	MGE	NDUFB11	LGE	Macaque	3.58235e-12	12
3.71171e-19	0.239301	0.398	0.267	MGE	CCT3	LGE	Macaque	1.56603e-14	12
2.58723e-14	0.236864	0.187	0.115	MGE	WIPI2	LGE	Macaque	7.1254e-11	12
4.43779e-19	0.236829	0.236	0.14	MGE	CCAR1	LGE	Macaque	1.50889e-11	12
3.33884e-19	0.265755	0.191	0.108	MGE	EPHA4	LGE	Macaque	5.25987e-10	11
3.90676e-13	0.255997	0.102	0.054	MGE	ZNF652	LGE	Macaque	5.57232e-10	11
9.7501e-24	0.25457	0.101	0.038	MGE	FAM110A	LGE	Macaque	1.79703e-13	11
1.47793e-14	0.251561	0.141	0.079	MGE	SNRPA1	LGE	Macaque	2.19684e-11	11
2.12689e-13	0.248135	0.131	0.074	MGE	CASD1	LGE	Macaque	4.10969e-09	11
1.43184e-23	0.245501	0.339	0.208	MGE	PSMD8	LGE	Macaque	4.0221e-13	11
2.18226e-14	0.240952	0.269	0.18	MGE	NDN	LGE	Macaque	6.16639e-08	11
9.02838e-17	0.240128	0.101	0.047	MGE	AKAP8	LGE	Macaque	5.55134e-12	11
3.96646e-16	0.237517	0.201	0.122	MGE	MBIP	LGE	Macaque	1.62928e-08	11
6.50455e-17	0.235708	0.551	0.413	MGE	PRRC2C	LGE	Macaque	5.20234e-12	11
3.14028e-11	0.254807	0.167	0.107	MGE	TLE4	LGE	Macaque	1.70922e-07	10
1.59742e-18	0.249182	0.171	0.093	MGE	VANGL2	LGE	Macaque	4.65594e-12	10
7.45891e-15	0.245906	0.103	0.052	MGE	GADD45A	LGE	Macaque	3.05487e-08	10
4.58263e-17	0.243393	0.117	0.057	MGE	BRAF	LGE	Macaque	4.41534e-12	10
4.04777e-17	0.239763	0.178	0.102	MGE	NT5C3B	LGE	Macaque	4.15526e-10	10
3.55544e-16	0.239638	0.155	0.087	MGE	LAPTM4B	LGE	Macaque	5.52415e-12	10
2.2291e-15	0.237443	0.144	0.08	MGE	TMEM126A	LGE	Macaque	9.23755e-11	10
1.40972e-13	0.236266	0.515	0.401	MGE	DNAJA1	LGE	Macaque	2.74251e-10	10
1.70769e-17	0.235284	0.101	0.045	MGE	SNRNP25	LGE	Macaque	6.80119e-12	10
5.33229e-35	0.268251	0.109	0.031	MGE	NUP62	LGE	Macaque	2.32161e-19	9
8.5802e-17	0.257176	0.168	0.095	MGE	CD81	LGE	Macaque	1.80003e-10	9
1.50104e-18	0.252565	0.404	0.274	MGE	GNAI2	LGE	Macaque	5.17169e-11	9
3.07397e-20	0.251202	0.302	0.187	MGE	PRTFDC1	LGE	Macaque	1.60574e-14	9
1.72549e-13	0.245975	0.133	0.075	MGE	CTBP1	LGE	Macaque	9.30791e-09	9
8.68321e-19	0.245716	0.306	0.197	MGE	PPP2R1A	LGE	Macaque	1.08006e-12	9
4.36072e-18	0.245652	0.174	0.097	MGE	KALRN	LGE	Macaque	1.7176e-10	9
1.26657e-17	0.243615	0.298	0.197	MGE	HES6	LGE	Macaque	3.31396e-11	9
1.05379e-16	0.241588	0.26	0.164	MGE	GTF3C6	LGE	Macaque	2.93191e-13	9
1.0828e-16	0.24143	0.314	0.209	MGE	PSMA4	LGE	Macaque	3.75541e-11	9
1.12987e-16	0.238202	0.268	0.17	MGE	SNF8	LGE	Macaque	4.97171e-13	9
9.75946e-16	0.23679	0.131	0.069	MGE	PTPN1	LGE	Macaque	3.11233e-12	9
1.77447e-20	0.235807	0.411	0.27	MGE	OST4	LGE	Macaque	3.9347e-13	9
2.4916e-18	0.235714	0.224	0.133	MGE	SMS	LGE	Macaque	5.28333e-12	9
4.86205e-16	0.234605	0.201	0.12	MGE	TXNL4A	LGE	Macaque	1.14813e-11	9
1.49872e-18	0.234478	0.498	0.355	MGE	EID1	LGE	Macaque	2.55389e-11	9
2.45476e-12	0.233348	0.221	0.147	MGE	CASK	LGE	Macaque	1.47778e-08	9
1.00049e-14	0.657082	0.1	0.051	MGE	TOP2A	LGE	Macaque	1.5534e-08	8
2.13868e-27	0.325822	0.101	0.034	MGE	CCSAP	LGE	Macaque	4.40006e-17	8
4.4088e-22	0.258558	0.144	0.069	MGE	ING3	LGE	Macaque	9.55961e-12	8
1.41148e-12	0.253708	0.192	0.126	MGE	MAF	LGE	Macaque	0.000201062	8
7.64857e-16	0.245496	0.304	0.203	MGE	PSMD2	LGE	Macaque	7.50914e-12	8
3.33273e-18	0.244729	0.439	0.307	MGE	FUBP1	LGE	Macaque	2.86427e-13	8
1.91694e-14	0.244297	0.141	0.08	MGE	ABAT	LGE	Macaque	9.02855e-11	8
7.91786e-16	0.243664	0.132	0.07	MGE	RAB30	LGE	Macaque	2.25903e-09	8
6.37671e-20	0.242023	0.364	0.236	MGE	PSMB6	LGE	Macaque	2.25707e-13	8
4.73863e-15	0.239635	0.105	0.052	MGE	KIAA1958	LGE	Macaque	7.90091e-10	8
3.18255e-21	0.238421	0.229	0.132	MGE	GOLM1	LGE	Macaque	8.7432e-12	8
3.77072e-08	0.261396	0.181	0.129	MGE	PTPRZ1	LGE	Macaque	0.0164914	7
[truncated: 5,964 more rows]

## Sheet: cgeLin
Table S6. DEGs of GE or CTX enrichment in MGE-derived and CGE-derived interneurons.
p_val	avg_log2FC	pct.1	pct.2	cluster	gene	ident2	species	p_val_adj	freq
4.32072e-28	1.5525	0.183	0.023	CTX	CNR1	CTX	Monkey	9.02892e-17	100
4.67957e-35	1.17566	0.375	0.124	CTX	NPAS3	CTX	Monkey	5.83713e-15	100
4.17344e-18	1.06046	0.301	0.129	CTX	LIMCH1	CTX	Monkey	1.09889e-09	100
1.036e-26	0.957474	0.585	0.356	CTX	MEF2C	CTX	Monkey	7.28389e-15	100
1.09823e-19	0.941724	0.287	0.115	CTX	THSD7A	CTX	Monkey	1.23463e-07	100
9.24194e-17	0.923344	0.275	0.12	CTX	ENC1	CTX	Monkey	0.000326095	100
1.97379e-16	0.917606	0.14	0.03	CTX	GRIN2B	CTX	Monkey	6.01752e-08	100
3.27018e-19	0.891201	0.164	0.036	CTX	MAF	CTX	Monkey	7.18824e-07	100
4.08831e-13	0.7506	0.337	0.189	CTX	CALB2	CTX	Monkey	0.000169429	100
1.74299e-16	0.742602	0.387	0.214	CTX	NPAS1	CTX	Monkey	2.10619e-05	100
1.54515e-13	0.728578	0.189	0.07	CTX	RPH3A	CTX	Monkey	0.000172464	100
2.15698e-14	0.694039	0.341	0.183	CTX	ANK3	CTX	Monkey	0.000472212	100
4.95924e-12	0.670957	0.526	0.402	CTX	PROX1	CTX	Monkey	0.000116539	100
1.38124e-13	0.647639	0.418	0.256	CTX	GRIA2	CTX	Monkey	0.000118028	100
5.41912e-18	0.434605	0.94	0.947	CTX	TCF4	CTX	Monkey	8.20198e-12	100
2.96923e-11	0.842867	0.137	0.045	CTX	IGF1	CTX	Monkey	0.00017486	99
2.84031e-12	0.732157	0.162	0.056	CTX	VSTM2A	CTX	Monkey	0.000731949	99
1.24417e-12	0.724959	0.174	0.063	CTX	ASIC1	CTX	Monkey	0.000332426	99
1.80234e-10	0.663209	0.354	0.214	CTX	NETO2	CTX	Monkey	0.000659732	99
1.97211e-07	0.643255	0.425	0.306	CTX	VCAN	CTX	Monkey	0.00122923	99
1.10876e-10	0.630683	0.443	0.305	CTX	KIF5C	CTX	Monkey	0.00191201	99
1.73216e-07	0.616486	0.11	0.043	CTX	EEF1A2	CTX	Monkey	0.0010647	98
7.41987e-12	0.561651	0.634	0.502	CTX	NRXN1	CTX	Monkey	0.000311136	98
2.04786e-10	0.38537	0.779	0.72	CTX	BASP1	CTX	Monkey	0.00168887	98
3.21507e-10	0.688409	0.18	0.079	CTX	KAZN	CTX	Monkey	0.00154499	97
2.61076e-09	0.594887	0.397	0.266	CTX	CAMK4	CTX	Monkey	0.00157218	96
2.41248e-06	0.933288	0.251	0.163	CTX	PCP4	CTX	Monkey	0.00203621	94
7.02594e-11	0.659206	0.184	0.079	CTX	ADARB2	CTX	Monkey	0.00280876	93
4.21847e-07	0.645552	0.116	0.049	CTX	ETV5	CTX	Monkey	0.00250885	93
3.40841e-09	0.604508	0.192	0.092	CTX	CADM2	CTX	Monkey	0.00319982	92
3.00897e-08	0.677448	0.252	0.148	CTX	KCNA3	CTX	Monkey	0.00249326	91
1.38343e-07	0.598783	0.317	0.209	CTX	AMER2	CTX	Monkey	0.00336136	90
1.75953e-08	0.590293	0.398	0.286	CTX	CAMK2N1	CTX	Monkey	0.00138024	89
2.8309e-06	0.629061	0.134	0.067	CTX	DKK3	CTX	Monkey	0.00440858	88
2.63962e-08	0.641846	0.229	0.126	CTX	FGF14	CTX	Monkey	0.00233063	86
9.68896e-17	1.22975	0.116	0.017	CTX	PTGDS	CTX	Monkey	4.18879e-09	81
5.98646e-07	0.58351	0.325	0.225	CTX	CCNH	CTX	Monkey	0.00550609	80
3.78712e-07	0.552475	0.252	0.153	CTX	ZNF536	CTX	Monkey	0.00486423	80
1.89111e-09	0.538976	0.548	0.444	CTX	ZEB2	CTX	Monkey	0.00401319	80
1.30644e-06	0.580197	0.103	0.043	CTX	ATP2B2	CTX	Monkey	0.00387103	79
7.6427e-12	0.586293	0.211	0.093	CTX	PNOC	CTX	Monkey	0.0047614	77
1.31303e-06	0.616177	0.136	0.066	CTX	FAT3	CTX	Monkey	0.00572811	76
3.0842e-09	0.651307	0.234	0.13	CTX	ZBTB18	CTX	Monkey	0.00462593	75
3.75733e-07	0.582576	0.282	0.175	CTX	SOBP	CTX	Monkey	0.00479121	71
1.6163e-09	0.563367	0.289	0.163	CTX	NRXN2	CTX	Monkey	0.00554921	70
1.39408e-07	0.521441	0.117	0.047	CTX	KCTD12	CTX	Monkey	0.00765268	70
3.21486e-06	0.428531	0.643	0.567	CTX	NCAM1	CTX	Monkey	0.00581792	69
3.13245e-07	0.49822	0.169	0.086	CTX	CRH	CTX	Monkey	0.00639888	68
7.56921e-07	0.449789	0.507	0.389	CTX	LUC7L3	CTX	Monkey	0.00508601	65
1.19562e-07	0.613973	0.107	0.04	CTX	CNTNAP5	CTX	Monkey	0.00327497	64
1.82331e-08	0.565012	0.163	0.075	CTX	SMARCA2	CTX	Monkey	0.00599508	61
1.37729e-07	0.513264	0.139	0.061	CTX	PPP2R2B	CTX	Monkey	0.00773494	61
3.70039e-09	0.532994	0.115	0.039	CTX	TMEM158	CTX	Monkey	0.00889692	60
9.35239e-07	0.573192	0.148	0.074	CTX	FJX1	CTX	Monkey	0.00480639	58
4.66616e-07	0.56184	0.117	0.049	CTX	MAGI2	CTX	Monkey	0.00579267	58
1.41804e-11	0.626781	0.109	0.028	CTX	SYNE1	CTX	Monkey	0.00232821	56
2.93673e-07	0.528437	0.534	0.464	CTX	NR2F2	CTX	Monkey	0.0126978	52
2.27063e-13	0.436309	0.51	0.339	CTX	STMN4	CTX	Monkey	0.00799161	51
7.27769e-10	0.532229	0.344	0.21	CTX	GNAO1	CTX	Monkey	0.00885662	50
1.15842e-06	0.562619	0.122	0.055	CTX	NKAIN3	CTX	Monkey	0.00633014	49
2.02153e-06	0.528997	0.139	0.069	CTX	ZNF385D	CTX	Monkey	0.00926067	49
2.27539e-10	0.328432	0.807	0.746	CTX	CALM1	CTX	Monkey	0.00516744	49
1.56553e-08	0.480911	0.507	0.374	CTX	ERBB4	CTX	Monkey	0.0101479	48
7.59831e-09	0.506615	0.338	0.213	CTX	NDN	CTX	Monkey	0.0098669	47
3.4637e-09	0.362665	0.724	0.646	CTX	CCK	CTX	Monkey	0.00747437	47
1.157e-06	0.55136	0.149	0.076	CTX	RGS17	CTX	Monkey	0.00976758	46
2.95376e-06	0.546535	0.105	0.045	CTX	GABRG2	CTX	Monkey	0.00929163	46
3.31521e-06	0.537288	0.183	0.101	CTX	C1QTNF4	CTX	Monkey	0.00895316	46
1.54751e-06	0.52846	0.21	0.123	CTX	TRIM44	CTX	Monkey	0.00902038	45
5.20816e-12	0.526683	0.144	0.046	CTX	DPF1	CTX	Monkey	0.00925964	45
1.7115e-08	0.393416	0.63	0.522	CTX	ARL4C	CTX	Monkey	0.0124989	45
2.27071e-09	0.73335	0.101	0.03	CTX	SYT4	CTX	Monkey	0.000122786	44
1.10448e-08	0.572663	0.151	0.066	CTX	GUCY1A2	CTX	Monkey	0.00918118	43
9.67749e-07	0.529714	0.12	0.052	CTX	GABRB3	CTX	Monkey	0.00579224	43
4.96182e-07	0.556659	0.107	0.043	CTX	PCLO	CTX	Monkey	0.00976865	42
3.26359e-06	0.572062	0.239	0.151	CTX	PTPRD	CTX	Monkey	0.00853502	41
9.12245e-12	0.566433	0.107	0.025	CTX	GABBR2	CTX	Monkey	0.00321868	41
8.81632e-07	0.406617	0.409	0.301	CTX	CXADR	CTX	Monkey	0.0113999	41
7.85076e-07	0.360628	0.66	0.577	CTX	GPM6A	CTX	Monkey	0.0118592	41
4.58598e-08	0.282185	0.841	0.784	CTX	AP1S2	CTX	Monkey	0.0117283	41
5.90801e-07	0.565495	0.17	0.087	CTX	PIK3R1	CTX	Monkey	0.0102394	37
3.38214e-07	0.501633	0.371	0.26	CTX	ANK2	CTX	Monkey	0.00722618	37
5.07578e-10	0.671404	0.111	0.034	CTX	NR3C2	CTX	Monkey	1.75179e-05	36
1.02893e-06	0.510232	0.107	0.044	CTX	GABRA1	CTX	Monkey	0.00885231	35
2.45115e-08	0.529774	0.261	0.148	CTX	LRRC7	CTX	Monkey	0.00999425	34
6.32492e-09	0.552795	0.301	0.185	CTX	PEG3	CTX	Monkey	0.0121677	33
1.48068e-06	0.250972	0.917	0.913	CTX	MAP1B	CTX	Monkey	0.00929891	33
5.99444e-07	0.551792	0.1	0.039	CTX	SLC1A2	CTX	Monkey	0.00387207	32
1.02857e-07	0.502635	0.137	0.059	CTX	TMEM178B	CTX	Monkey	0.0129492	32
5.82008e-07	0.399792	0.683	0.584	CTX	YWHAE	CTX	Monkey	0.0110825	31
4.8103e-10	0.370431	0.695	0.605	CTX	NREP	CTX	Monkey	0.0114246	31
1.5232e-10	0.333243	0.687	0.56	CTX	CKB	CTX	Monkey	0.0103507	31
3.37678e-07	0.575073	0.107	0.041	CTX	SEMA6A	CTX	Monkey	0.0018983	30
2.49985e-08	0.553299	0.305	0.19	CTX	CSRNP3	CTX	Monkey	0.0117901	30
1.95944e-06	0.532808	0.132	0.063	CTX	TRIM9	CTX	Monkey	0.00935227	30
3.10061e-06	0.543686	0.205	0.12	CTX	DNER	CTX	Monkey	0.00876547	29
1.87935e-06	0.526475	0.369	0.264	CTX	ARHGAP21	CTX	Monkey	0.012016	29
3.00798e-06	0.509144	0.143	0.071	CTX	CTTNBP2	CTX	Monkey	0.0137506	29
2.86184e-06	0.555123	0.148	0.077	CTX	FGF12	CTX	Monkey	0.00963656	28
2.95241e-06	0.520344	0.228	0.14	CTX	FAM110B	CTX	Monkey	0.010766	28
2.1681e-07	0.4714	0.391	0.271	CTX	MAPT	CTX	Monkey	0.0104057	28
1.11888e-08	0.530316	0.124	0.047	CTX	RAB3C	CTX	Monkey	0.0122767	27
8.88072e-08	0.528483	0.115	0.045	CTX	FBXW7	CTX	Monkey	0.00852298	27
3.74764e-07	0.513503	0.301	0.192	CTX	CHL1	CTX	Monkey	0.0122555	27
5.37061e-10	0.509349	0.289	0.163	CTX	REV3L	CTX	Monkey	0.00842594	27
2.01565e-10	0.494738	0.193	0.085	CTX	CNIH2	CTX	Monkey	0.012574	27
2.87489e-09	0.480427	0.134	0.051	CTX	NTN4	CTX	Monkey	0.00926428	27
1.0688e-08	0.609212	0.154	0.068	CTX	PCDH10	CTX	Monkey	0.0107098	26
1.57974e-07	0.559761	0.168	0.085	CTX	PAG1	CTX	Monkey	0.0103295	26
3.06784e-08	0.498662	0.141	0.061	CTX	SLC5A3	CTX	Monkey	0.0131745	26
9.39811e-13	0.683616	0.107	0.023	CTX	RPRM	CTX	Monkey	0.000897564	25
1.61541e-08	0.571154	0.223	0.12	CTX	HSPH1	CTX	Monkey	0.0103239	25
1.54015e-07	0.514237	0.136	0.06	CTX	DNM3	CTX	Monkey	0.0117509	25
9.83029e-10	0.509104	0.307	0.182	CTX	ZBTB16	CTX	Monkey	0.0116839	25
1.15042e-06	0.509603	0.197	0.111	CTX	SEZ6L	CTX	Monkey	0.00952798	24
3.25139e-06	0.502776	0.17	0.094	CTX	CHD5	CTX	Monkey	0.0154844	24
2.04263e-06	0.483137	0.131	0.062	CTX	TMEM59L	CTX	Monkey	0.0172199	24
1.56479e-06	0.472944	0.114	0.049	CTX	EPB41L1	CTX	Monkey	0.0109696	24
6.23674e-08	0.553349	0.201	0.108	CTX	PTPRO	CTX	Monkey	0.0116258	23
3.82931e-07	0.539126	0.206	0.117	CTX	ATP9A	CTX	Monkey	0.0137298	23
1.06493e-06	0.51049	0.123	0.055	CTX	MAP6	CTX	Monkey	0.0111568	23
1.86319e-11	0.446037	0.521	0.372	CTX	YWHAB	CTX	Monkey	0.00934169	23
4.09137e-20	0.854656	0.129	0.015	CTX	CALY	CTX	Monkey	2.75996e-10	22
1.06927e-09	0.546265	0.159	0.066	CTX	TUBB4A	CTX	Monkey	0.00722859	21
1.1442e-06	0.518525	0.137	0.067	CTX	UBE2QL1	CTX	Monkey	0.0115112	21
1.19293e-06	0.549165	0.249	0.155	CTX	PABPN1	CTX	Monkey	0.0118806	20
3.68171e-07	0.544351	0.217	0.123	CTX	RGS12	CTX	Monkey	0.0128166	20
8.30534e-07	0.538845	0.256	0.16	CTX	ZRANB2	CTX	Monkey	0.0096382	20
3.05169e-09	0.534391	0.274	0.155	CTX	RUNX1T1	CTX	Monkey	0.0138298	20
3.3325e-06	0.446267	0.493	0.397	CTX	MYT1L	CTX	Monkey	0.0131684	20
1.07177e-06	0.562332	0.18	0.099	CTX	DACT1	CTX	Monkey	0.0140987	19
9.21062e-09	0.526999	0.289	0.172	CTX	UBE2K	CTX	Monkey	0.00949669	19
2.76312e-06	0.49066	0.174	0.095	CTX	FADS1	CTX	Monkey	0.0154827	19
1.63435e-06	0.462848	0.129	0.06	CTX	UBASH3B	CTX	Monkey	0.0121988	19
2.55401e-11	0.634284	0.102	0.024	CTX	TGFB2	CTX	Monkey	0.000112627	18
6.24754e-07	0.530475	0.139	0.067	CTX	NMNAT2	CTX	Monkey	0.0129032	18
2.72272e-09	0.503471	0.145	0.057	CTX	NLN	CTX	Monkey	0.0182233	18
4.59085e-08	0.371643	0.618	0.499	CTX	NUCKS1	CTX	Monkey	0.00639367	18
1.57791e-06	0.504047	0.105	0.044	CTX	FMNL2	CTX	Monkey	0.0175826	17
3.40739e-08	0.539278	0.178	0.087	CTX	SCN3B	CTX	Monkey	0.0100986	16
3.16349e-06	0.493824	0.231	0.14	CTX	TSPAN7	CTX	Monkey	0.017336	16
2.08483e-06	0.481805	0.249	0.155	CTX	YPEL3	CTX	Monkey	0.0127384	16
5.71391e-10	0.636108	0.109	0.032	CTX	DLG2	CTX	Monkey	4.81269e-06	15
7.28785e-07	0.579392	0.214	0.125	CTX	GAP43	CTX	Monkey	0.0153676	15
1.2788e-07	0.494218	0.176	0.089	CTX	NPTXR	CTX	Monkey	0.0177743	15
2.33455e-07	0.567968	0.105	0.04	CTX	OPCML	CTX	Monkey	0.00124073	14
1.18312e-06	0.495468	0.317	0.214	CTX	ATP6V0B	CTX	Monkey	0.0142555	14
3.31337e-07	0.390474	0.689	0.6	CTX	CEP170	CTX	Monkey	0.0121658	14
1.89282e-06	0.359099	0.563	0.462	CTX	SET	CTX	Monkey	0.0210385	14
3.30366e-07	0.544535	0.16	0.08	CTX	RAC3	CTX	Monkey	0.0148402	13
6.82913e-09	0.4943	0.18	0.087	CTX	HIP1	CTX	Monkey	0.0188412	13
1.49629e-06	0.492691	0.144	0.07	CTX	SGIP1	CTX	Monkey	0.0174973	13
8.01147e-09	0.665064	0.101	0.032	CTX	DAB1	CTX	Monkey	0.000138572	12
2.82443e-07	0.542217	0.174	0.09	CTX	FAM3C	CTX	Monkey	0.00867793	12
2.51587e-06	0.533331	0.176	0.099	CTX	GRIA1	CTX	Monkey	0.0212534	12
2.95195e-06	0.526268	0.197	0.115	CTX	PGM2L1	CTX	Monkey	0.0145961	12
1.74947e-06	0.51281	0.301	0.203	CTX	ID4	CTX	Monkey	0.0154038	12
3.41145e-06	0.505456	0.132	0.064	CTX	SPIRE1	CTX	Monkey	0.0144668	12
1.37597e-06	0.503234	0.171	0.092	CTX	AASDHPPT	CTX	Monkey	0.0208325	12
1.65331e-07	0.499391	0.102	0.038	CTX	ZNF652	CTX	Monkey	0.0144375	12
2.18921e-08	0.428189	0.599	0.474	CTX	UCHL1	CTX	Monkey	0.0110435	12
1.293e-08	0.551641	0.213	0.113	CTX	AUTS2	CTX	Monkey	0.0120703	11
6.36491e-07	0.533955	0.197	0.109	CTX	GNB1	CTX	Monkey	0.0159931	11
8.29774e-07	0.514455	0.269	0.171	CTX	SCN3A	CTX	Monkey	0.00987641	11
2.9369e-06	0.501817	0.14	0.071	CTX	PCDH8	CTX	Monkey	0.0151382	11
3.51831e-07	0.487734	0.12	0.051	CTX	TNIK	CTX	Monkey	0.0181911	11
2.6876e-06	0.480391	0.24	0.148	CTX	SERINC1	CTX	Monkey	0.0171401	11
2.28228e-07	0.411437	0.528	0.431	CTX	KIDINS220	CTX	Monkey	0.0128994	11
2.29003e-07	0.549972	0.107	0.041	CTX	PPFIA2	CTX	Monkey	0.00767612	10
9.04613e-09	0.526843	0.136	0.054	CTX	RNF187	CTX	Monkey	0.00962608	10
5.80475e-07	0.525034	0.124	0.055	CTX	SORCS3	CTX	Monkey	0.0116728	10
3.87987e-09	0.521757	0.132	0.051	CTX	ATP1A3	CTX	Monkey	0.0121259	10
3.73768e-07	0.503351	0.129	0.057	CTX	PLXNA4	CTX	Monkey	0.0106839	10
2.93624e-06	0.463559	0.126	0.06	CTX	B3GALNT1	CTX	Monkey	0.0190418	10
1.59627e-06	0.45716	0.163	0.085	CTX	FAM171A2	CTX	Monkey	0.019295	10
3.89181e-07	0.525913	0.11	0.045	CTX	MCC	CTX	Monkey	0.0194824	9
1.32752e-06	0.518489	0.143	0.07	CTX	EPM2AIP1	CTX	Monkey	0.0184391	9
2.3145e-11	0.505265	0.197	0.085	CTX	ETNK1	CTX	Monkey	0.0180331	9
1.2483e-07	0.487058	0.11	0.043	CTX	ATP1A1	CTX	Monkey	0.0103802	9
5.84883e-07	0.466862	0.33	0.228	CTX	DDX24	CTX	Monkey	0.0184692	9
5.74905e-07	0.415505	0.603	0.489	CTX	TSC22D1	CTX	Monkey	0.00675794	9
3.31227e-06	0.324198	0.752	0.686	CTX	CFL1	CTX	Monkey	0.0230693	9
3.43478e-06	0.316556	0.492	0.367	CTX	SYNPR	CTX	Monkey	0.0144065	9
2.37592e-06	0.542781	0.207	0.121	CTX	DYNLL2	CTX	Monkey	0.0110877	8
3.96733e-09	0.531126	0.143	0.057	CTX	HSDL1	CTX	Monkey	0.0117677	8
6.9507e-08	0.518546	0.185	0.093	CTX	HECTD4	CTX	Monkey	0.0144603	8
1.94536e-06	0.518532	0.114	0.051	CTX	GRIP1	CTX	Monkey	0.0154307	8
9.98004e-07	0.504449	0.101	0.04	CTX	ENDOG	CTX	Monkey	0.0133931	8
6.18121e-07	0.495966	0.109	0.045	CTX	ERC2	CTX	Monkey	0.00813075	8
1.36129e-07	0.488488	0.114	0.045	CTX	ELOVL6	CTX	Monkey	0.0122648	8
6.76619e-08	0.486018	0.305	0.19	CTX	KTN1	CTX	Monkey	0.0133711	8
3.33785e-06	0.45171	0.38	0.277	CTX	DPYSL5	CTX	Monkey	0.027948	8
1.24589e-07	0.415526	0.557	0.475	CTX	ANKRD12	CTX	Monkey	0.016886	8
9.65933e-08	0.323999	0.706	0.613	CTX	SYT1	CTX	Monkey	0.0136443	8
1.40239e-07	0.259564	0.832	0.757	CTX	RTN1	CTX	Monkey	0.010931	8
1.52178e-06	0.571835	0.139	0.069	CTX	PPP1R9A	CTX	Monkey	0.0186193	7
2.42152e-06	0.547293	0.117	0.054	CTX	NEGR1	CTX	Monkey	0.0145517	7
3.23342e-06	0.542985	0.185	0.108	CTX	FDPS	CTX	Monkey	0.0150826	7
2.07344e-06	0.53544	0.22	0.132	CTX	PRKAR2B	CTX	Monkey	0.0170959	7
5.16317e-07	0.515549	0.16	0.08	CTX	BLCAP	CTX	Monkey	0.0142643	7
6.22119e-08	0.511195	0.116	0.045	CTX	KCND3	CTX	Monkey	0.0152937	7
6.25502e-08	0.510381	0.232	0.131	CTX	PRDM2	CTX	Monkey	0.0118137	7
5.40267e-08	0.49845	0.125	0.051	CTX	PRNP	CTX	Monkey	0.0065773	7
1.51447e-07	0.496434	0.233	0.134	CTX	SUGP2	CTX	Monkey	0.0139681	7
8.25007e-07	0.492938	0.23	0.134	CTX	PDS5B	CTX	Monkey	0.00842549	7
5.10828e-08	0.490953	0.308	0.193	CTX	NRXN3	CTX	Monkey	0.0181118	7
1.28309e-06	0.484291	0.311	0.213	CTX	PTOV1	CTX	Monkey	0.0168893	7
2.29427e-06	0.478653	0.148	0.077	CTX	PPP3CB	CTX	Monkey	0.0181692	7
2.18902e-08	0.474346	0.398	0.274	CTX	MACF1	CTX	Monkey	0.0156177	7
1.16488e-06	0.474233	0.4	0.287	CTX	JAKMIP2	CTX	Monkey	0.0111606	7
8.00923e-07	0.47081	0.172	0.09	CTX	CPE	CTX	Monkey	0.0130026	7
1.2782e-06	0.447469	0.376	0.264	CTX	ATXN7L3B	CTX	Monkey	0.0130502	7
4.23294e-07	0.43829	0.114	0.047	CTX	CHMP2B	CTX	Monkey	0.0181119	7
1.25357e-09	0.580564	0.105	0.031	CTX	XKR4	CTX	Monkey	0.00027621	6
3.12514e-08	0.559007	0.136	0.057	CTX	ZFC3H1	CTX	Monkey	0.0154555	6
1.34881e-06	0.552482	0.117	0.052	CTX	CSMD3	CTX	Monkey	0.011875	6
1.50403e-09	0.527277	0.251	0.134	CTX	SRGAP3	CTX	Monkey	0.0216649	6
7.90095e-07	0.522716	0.121	0.053	CTX	AFF3	CTX	Monkey	0.00380252	6
1.77821e-06	0.522589	0.201	0.117	CTX	CTNND2	CTX	Monkey	0.0233322	6
1.50519e-06	0.520859	0.194	0.11	CTX	PURG	CTX	Monkey	0.0174095	6
4.66382e-10	0.51319	0.213	0.103	CTX	ATP6AP2	CTX	Monkey	0.0188076	6
2.74445e-07	0.51013	0.208	0.116	CTX	GNPTAB	CTX	Monkey	0.00298562	6
1.74131e-06	0.505955	0.148	0.076	CTX	TRIB2	CTX	Monkey	0.0174582	6
1.09407e-06	0.505906	0.144	0.07	CTX	UFM1	CTX	Monkey	0.0126014	6
9.86807e-07	0.496331	0.117	0.052	CTX	SRCIN1	CTX	Monkey	0.0165369	6
9.11352e-07	0.495954	0.148	0.074	CTX	DPP6	CTX	Monkey	0.0150927	6
1.70615e-06	0.49479	0.108	0.046	CTX	SSBP4	CTX	Monkey	0.0147432	6
1.11719e-06	0.48438	0.276	0.176	CTX	KIF21A	CTX	Monkey	0.0164923	6
6.38249e-07	0.483156	0.141	0.068	CTX	ACSL3	CTX	Monkey	0.030838	6
6.61222e-07	0.48157	0.152	0.075	CTX	SYT14	CTX	Monkey	0.0140396	6
2.46861e-07	0.474803	0.367	0.251	CTX	TTC28	CTX	Monkey	0.00394382	6
1.58716e-06	0.459017	0.157	0.082	CTX	AGFG1	CTX	Monkey	0.0203147	6
2.51951e-07	0.441929	0.379	0.264	CTX	SCG5	CTX	Monkey	0.0162836	6
8.40445e-07	0.429027	0.498	0.394	CTX	RAB2A	CTX	Monkey	0.0215492	6
1.1556e-06	0.287761	0.806	0.721	CTX	HNRNPA2B1	CTX	Monkey	0.00703819	6
2.30537e-07	0.573903	0.157	0.078	CTX	PSMD1	CTX	Monkey	0.00531067	5
1.07599e-06	0.558302	0.18	0.101	CTX	MAP7D1	CTX	Monkey	0.0118199	5
2.69313e-06	0.542475	0.284	0.191	CTX	OLFM1	CTX	Monkey	0.023427	5
6.40699e-07	0.531829	0.177	0.093	CTX	EIF4G3	CTX	Monkey	0.0164999	5
1.03533e-06	0.522317	0.155	0.08	CTX	BACH2	CTX	Monkey	0.00956161	5
1.00958e-06	0.516111	0.14	0.068	CTX	RNF180	CTX	Monkey	0.024704	5
2.79176e-07	0.501993	0.186	0.099	CTX	HIPK2	CTX	Monkey	0.0198625	5
1.08775e-07	0.490222	0.345	0.229	CTX	SPTAN1	CTX	Monkey	0.0101959	5
1.23657e-06	0.475821	0.183	0.1	CTX	TMEM132A	CTX	Monkey	0.0188696	5
1.38869e-06	0.474672	0.283	0.184	CTX	CTXN1	CTX	Monkey	0.0274006	5
1.88447e-06	0.470101	0.101	0.041	CTX	LMO2	CTX	Monkey	0.00873549	5
2.16728e-06	0.463184	0.172	0.093	CTX	ROBO1	CTX	Monkey	0.0103258	5
1.28422e-06	0.454146	0.262	0.166	CTX	GABRB2	CTX	Monkey	0.0148463	5
4.72219e-07	0.432926	0.389	0.275	CTX	UBE2E3	CTX	Monkey	0.0184472	5
2.05533e-06	0.373581	0.563	0.457	CTX	CELF4	CTX	Monkey	0.0149851	5
4.7486e-11	0.782545	0.106	0.028	CTX	ARPP21	CTX	Monkey	1.60004e-06	4
2.84809e-07	0.623569	0.122	0.053	CTX	CSRP2	CTX	Monkey	0.00926768	4
7.9623e-08	0.610702	0.109	0.041	CTX	SLCO5A1	CTX	Monkey	0.00603189	4
1.6328e-09	0.607563	0.1	0.029	CTX	SCN2A	CTX	Monkey	0.000279079	4
3.51825e-08	0.580889	0.164	0.078	CTX	ARL10	CTX	Monkey	0.000772443	4
5.60734e-07	0.575008	0.1	0.039	CTX	SNAP91	CTX	Monkey	0.00231715	4
3.77018e-07	0.530924	0.276	0.177	CTX	REEP1	CTX	Monkey	0.0139846	4
1.10501e-06	0.526717	0.207	0.118	CTX	CPEB4	CTX	Monkey	0.0348342	4
1.48578e-06	0.524052	0.184	0.102	CTX	GOPC	CTX	Monkey	0.0209436	4
2.00715e-09	0.519646	0.172	0.077	CTX	AKAP6	CTX	Monkey	0.00804845	4
2.85265e-06	0.504186	0.195	0.113	CTX	MAPRE2	CTX	Monkey	0.0130676	4
2.62995e-06	0.501145	0.17	0.092	CTX	NFAT5	CTX	Monkey	0.0166696	4
2.21555e-06	0.490787	0.137	0.068	CTX	OXR1	CTX	Monkey	0.0115473	4
4.43647e-08	0.483683	0.108	0.039	CTX	STX1B	CTX	Monkey	0.00540634	4
1.09793e-07	0.48109	0.209	0.113	CTX	STXBP1	CTX	Monkey	0.0140569	4
2.8582e-07	0.466605	0.229	0.132	CTX	CLCN3	CTX	Monkey	0.00704315	4
2.21539e-06	0.457004	0.111	0.048	CTX	GLRX5	CTX	Monkey	0.0302404	4
9.30248e-07	0.430082	0.163	0.083	CTX	VMA21	CTX	Monkey	0.019859	4
3.30222e-06	0.275837	0.785	0.732	CTX	DCX	CTX	Monkey	0.0389162	4
7.95919e-09	0.73949	0.101	0.032	CTX	PCDH7	CTX	Monkey	0.000326507	3
6.09997e-08	0.588377	0.201	0.107	CTX	SHANK2	CTX	Monkey	0.00151485	3
3.48826e-06	0.553413	0.144	0.075	CTX	LENG8	CTX	Monkey	0.0292881	3
1.66782e-06	0.551605	0.239	0.151	CTX	AZIN1	CTX	Monkey	0.0132306	3
3.41913e-07	0.549496	0.143	0.067	CTX	PRKCA	CTX	Monkey	0.0117978	3
3.94361e-07	0.539852	0.121	0.052	CTX	PPM1K	CTX	Monkey	0.0101699	3
4.10503e-07	0.52152	0.191	0.103	CTX	CCSER1	CTX	Monkey	0.00476685	3
1.11386e-06	0.519442	0.151	0.077	CTX	PDRG1	CTX	Monkey	0.0201525	3
2.04733e-06	0.517833	0.183	0.101	CTX	ARL6IP5	CTX	Monkey	0.0175572	3
2.23151e-07	0.514009	0.107	0.041	CTX	BRSK2	CTX	Monkey	0.0112819	3
2.20295e-06	0.511777	0.172	0.094	CTX	FLRT2	CTX	Monkey	0.0217366	3
1.0833e-07	0.508117	0.146	0.067	CTX	LAPTM4B	CTX	Monkey	0.0141222	3
3.08053e-09	0.503862	0.143	0.056	CTX	MSMO1	CTX	Monkey	0.0107066	3
1.64132e-06	0.484934	0.1	0.04	CTX	NYAP2	CTX	Monkey	0.0234789	3
7.89392e-07	0.482595	0.189	0.103	CTX	CLTB	CTX	Monkey	0.0113349	3
1.30859e-06	0.482376	0.123	0.056	CTX	SHROOM2	CTX	Monkey	0.00954016	3
3.48985e-06	0.481945	0.207	0.122	CTX	MYO5A	CTX	Monkey	0.0278518	3
8.72195e-08	0.477017	0.17	0.083	CTX	ZNRF1	CTX	Monkey	0.0106317	3
1.98394e-08	0.468409	0.124	0.048	CTX	DEAF1	CTX	Monkey	0.0160031	3
2.09936e-06	0.465108	0.134	0.066	CTX	GPR27	CTX	Monkey	0.0218556	3
1.79593e-06	0.461455	0.141	0.07	CTX	NAP1L5	CTX	Monkey	0.0247766	3
9.0496e-07	0.457903	0.292	0.189	CTX	TMOD2	CTX	Monkey	0.00976597	3
2.32321e-06	0.457638	0.218	0.131	CTX	MED13L	CTX	Monkey	0.0252396	3
4.41804e-07	0.45495	0.295	0.189	CTX	KLHL23	CTX	Monkey	0.0222731	3
5.79135e-07	0.444062	0.475	0.371	CTX	APC	CTX	Monkey	0.00636927	3
2.48683e-08	0.436734	0.487	0.357	CTX	ELAVL4	CTX	Monkey	0.0226521	3
1.97981e-07	0.429889	0.384	0.266	CTX	PODXL2	CTX	Monkey	0.0113871	3
2.59912e-06	0.40502	0.144	0.072	CTX	THRB	CTX	Monkey	0.0254459	3
1.49893e-06	0.37433	0.444	0.333	CTX	RAB14	CTX	Monkey	0.0276923	3
1.15976e-06	0.587557	0.297	0.199	CTX	NOVA1	CTX	Monkey	0.00824355	2
2.23711e-07	0.573322	0.128	0.055	CTX	LMO3	CTX	Monkey	0.00330085	2
1.41683e-08	0.553575	0.105	0.034	CTX	NECAB1	CTX	Monkey	0.000179907	2
6.21624e-08	0.553448	0.138	0.061	CTX	TMEM259	CTX	Monkey	0.0100887	2
4.79373e-07	0.549709	0.166	0.086	CTX	SSU72	CTX	Monkey	0.00377285	2
8.14055e-07	0.531312	0.179	0.097	CTX	USP7	CTX	Monkey	0.0119836	2
2.54413e-06	0.52484	0.236	0.147	CTX	SPTBN1	CTX	Monkey	0.0196044	2
2.83689e-06	0.523618	0.133	0.066	CTX	ENO2	CTX	Monkey	0.020169	2
1.50595e-06	0.520054	0.128	0.061	CTX	AGO4	CTX	Monkey	0.0134099	2
9.39362e-07	0.518401	0.134	0.064	CTX	ARHGEF12	CTX	Monkey	0.013811	2
1.12569e-06	0.516162	0.331	0.23	CTX	TOP1	CTX	Monkey	0.0179958	2
2.69116e-06	0.501644	0.187	0.107	CTX	HMGCS1	CTX	Monkey	0.0224805	2
1.02183e-06	0.500846	0.133	0.063	CTX	EHBP1	CTX	Monkey	0.00982695	2
5.27567e-07	0.488041	0.125	0.056	CTX	PRR36	CTX	Monkey	0.0187314	2
2.59634e-06	0.487246	0.21	0.124	CTX	MAGED1	CTX	Monkey	0.0197993	2
6.41522e-07	0.486426	0.197	0.109	CTX	CAMSAP1	CTX	Monkey	0.0231655	2
4.8482e-07	0.486268	0.198	0.109	CTX	SMCHD1	CTX	Monkey	0.00937218	2
1.9496e-06	0.481143	0.123	0.057	CTX	CNRIP1	CTX	Monkey	0.0350489	2
3.2426e-06	0.481075	0.215	0.132	CTX	PGAP1	CTX	Monkey	0.0470405	2
1.01324e-06	0.480246	0.139	0.068	CTX	SLC35F1	CTX	Monkey	0.0143047	2
8.89017e-08	0.478423	0.213	0.114	CTX	ATP6V0D1	CTX	Monkey	0.00729994	2
8.19552e-07	0.475281	0.156	0.079	CTX	ARL8A	CTX	Monkey	0.0224773	2
1.97001e-06	0.472409	0.317	0.218	CTX	DAAM1	CTX	Monkey	0.0188516	2
7.33753e-07	0.468798	0.186	0.102	CTX	SV2A	CTX	Monkey	0.0145569	2
2.40769e-06	0.468363	0.298	0.201	CTX	KIFAP3	CTX	Monkey	0.0229156	2
2.8543e-07	0.4672	0.117	0.048	CTX	CACNA1E	CTX	Monkey	0.020789	2
1.06543e-06	0.460029	0.395	0.283	CTX	PNN	CTX	Monkey	0.0149575	2
2.03242e-06	0.457478	0.209	0.122	CTX	LRP8	CTX	Monkey	0.0377501	2
1.35418e-06	0.45717	0.276	0.175	CTX	CCT6A	CTX	Monkey	0.0221199	2
3.87474e-07	0.454396	0.234	0.137	CTX	KIAA1109	CTX	Monkey	0.0212014	2
5.82538e-07	0.452875	0.437	0.332	CTX	KIF1B	CTX	Monkey	0.0100954	2
2.95687e-07	0.447489	0.139	0.063	CTX	ATP13A2	CTX	Monkey	0.0132357	2
1.26133e-06	0.444413	0.139	0.067	CTX	PRR7	CTX	Monkey	0.0309585	2
7.13901e-07	0.440809	0.294	0.193	CTX	SEC11C	CTX	Monkey	0.00700999	2
6.75155e-07	0.435218	0.423	0.32	CTX	TNRC6B	CTX	Monkey	0.00703909	2
1.38551e-06	0.435006	0.445	0.336	CTX	XRCC5	CTX	Monkey	0.0240343	2
2.24196e-06	0.412302	0.157	0.083	CTX	CHST11	CTX	Monkey	0.0342591	2
1.30034e-06	0.404646	0.185	0.101	CTX	SLC22A17	CTX	Monkey	0.0260055	2
3.23653e-06	0.38104	0.556	0.457	CTX	HNRNPA3	CTX	Monkey	0.0377808	2
4.27086e-10	0.651631	0.101	0.028	CTX	RAB12	CTX	Monkey	6.06376e-06	1
2.12848e-12	0.651428	0.1	0.02	CTX	KHDRBS3	CTX	Monkey	3.02201e-08	1
1.67868e-08	0.645202	0.251	0.146	CTX	SRGAP1	CTX	Monkey	0.000238339	1
1.24053e-08	0.610049	0.337	0.217	CTX	PRRC2B	CTX	Monkey	0.00017613	1
4.97266e-08	0.600242	0.11	0.041	CTX	TBC1D23	CTX	Monkey	0.000706018	1
1.90303e-06	0.597513	0.19	0.11	CTX	ITSN1	CTX	Monkey	0.0270192	1
3.37641e-07	0.587632	0.148	0.071	CTX	ARL2	CTX	Monkey	0.00479383	1
5.42142e-07	0.585406	0.1	0.039	CTX	CS	CTX	Monkey	0.00769734	1
4.96794e-08	0.583043	0.269	0.162	CTX	ATAT1	CTX	Monkey	0.000705348	1
5.45671e-07	0.57221	0.174	0.092	CTX	TTC14	CTX	Monkey	0.00774744	1
3.14994e-06	0.569462	0.186	0.108	CTX	TRIO	CTX	Monkey	0.0447229	1
9.02987e-07	0.566702	0.16	0.083	CTX	ITFG1	CTX	Monkey	0.0128206	1
4.17013e-10	0.563706	0.108	0.031	CTX	HTRA1	CTX	Monkey	5.92076e-06	1
1.13021e-06	0.562804	0.245	0.153	CTX	NBEA	CTX	Monkey	0.0160467	1
2.68325e-08	0.560367	0.106	0.037	CTX	MAP2K6	CTX	Monkey	0.000380968	1
1.24522e-06	0.556273	0.113	0.049	CTX	R3HDM1	CTX	Monkey	0.0176796	1
2.82357e-07	0.555687	0.107	0.043	CTX	SORBS2	CTX	Monkey	0.00400891	1
6.18318e-10	0.55158	0.101	0.028	CTX	SHISA6	CTX	Monkey	8.77888e-06	1
5.2674e-07	0.549856	0.117	0.051	CTX	CDC42BPB	CTX	Monkey	0.00747865	1
2.76393e-06	0.549593	0.128	0.062	CTX	SH3RF3	CTX	Monkey	0.0392423	1
6.12365e-07	0.547471	0.166	0.086	CTX	PPP6R2	CTX	Monkey	0.00869436	1
6.7475e-07	0.547288	0.115	0.049	CTX	GALNT1	CTX	Monkey	0.0095801	1
4.72653e-07	0.54525	0.279	0.176	CTX	CCP110	CTX	Monkey	0.00671073	1
1.05882e-06	0.545071	0.164	0.087	CTX	TTLL7	CTX	Monkey	0.0150331	1
5.22226e-07	0.541018	0.186	0.102	CTX	KIF5A	CTX	Monkey	0.00741457	1
6.48368e-08	0.538431	0.106	0.038	CTX	FNIP2	CTX	Monkey	0.000920553	1
2.02982e-07	0.537491	0.107	0.041	CTX	RABGAP1L	CTX	Monkey	0.00288193	1
8.64104e-07	0.537159	0.206	0.118	CTX	CMIP	CTX	Monkey	0.0122685	1
4.05889e-07	0.536747	0.251	0.153	CTX	FYN	CTX	Monkey	0.00576282	1
1.13367e-07	0.534776	0.17	0.085	CTX	OGT	CTX	Monkey	0.00160959	1
1.64331e-06	0.532101	0.107	0.046	CTX	CACNB4	CTX	Monkey	0.0233318	1
3.29972e-06	0.531898	0.149	0.079	CTX	ZCCHC14	CTX	Monkey	0.0468495	1
1.45002e-06	0.529667	0.198	0.115	CTX	USP33	CTX	Monkey	0.0205874	1
3.7783e-08	0.526101	0.101	0.034	CTX	B3GALT6	CTX	Monkey	0.000536444	1
4.02821e-07	0.525358	0.125	0.055	CTX	SAMD1	CTX	Monkey	0.00571925	1
1.47879e-06	0.524259	0.239	0.146	CTX	PREPL	CTX	Monkey	0.0209959	1
8.21541e-07	0.521798	0.183	0.1	CTX	RAB6A	CTX	Monkey	0.0116642	1
1.82005e-06	0.519358	0.103	0.044	CTX	RAB30	CTX	Monkey	0.025841	1
3.49104e-06	0.517639	0.207	0.125	CTX	MRFAP1L1	CTX	Monkey	0.0495658	1
1.34244e-06	0.517259	0.267	0.169	CTX	PTBP2	CTX	Monkey	0.01906	1
3.29316e-06	0.516982	0.103	0.045	CTX	PDZD8	CTX	Monkey	0.0467562	1
6.02337e-07	0.515552	0.154	0.077	CTX	JARID2	CTX	Monkey	0.00855198	1
3.67224e-07	0.515336	0.2	0.11	CTX	R3HDM2	CTX	Monkey	0.00521385	1
1.30577e-07	0.511286	0.107	0.04	CTX	STXBP5	CTX	Monkey	0.00185393	1
2.12169e-06	0.510494	0.161	0.086	CTX	PSMB4	CTX	Monkey	0.0301238	1
2.48047e-07	0.508772	0.292	0.185	CTX	CELF5	CTX	Monkey	0.00352177	1
9.07207e-07	0.506106	0.161	0.084	CTX	CCDC66	CTX	Monkey	0.0128805	1
4.99084e-07	0.505643	0.217	0.124	CTX	NCOA3	CTX	Monkey	0.007086	1
1.54154e-07	0.505516	0.201	0.108	CTX	COPB2	CTX	Monkey	0.00218868	1
7.73184e-07	0.50498	0.491	0.397	CTX	FABP7	CTX	Monkey	0.0109777	1
1.89852e-06	0.504915	0.205	0.118	CTX	CPSF6	CTX	Monkey	0.0269552	1
8.16598e-07	0.502822	0.146	0.071	CTX	MAPRE3	CTX	Monkey	0.0115941	1
3.23424e-06	0.497937	0.167	0.092	CTX	MLLT3	CTX	Monkey	0.0459197	1
2.2009e-06	0.496872	0.307	0.208	CTX	CD200	CTX	Monkey	0.0312483	1
1.59889e-07	0.496173	0.162	0.078	CTX	BOD1	CTX	Monkey	0.0022701	1
2.93365e-06	0.495479	0.107	0.047	CTX	CELSR2	CTX	Monkey	0.041652	1
9.81729e-07	0.494453	0.287	0.183	CTX	SCAMP1	CTX	Monkey	0.0139386	1
1.47698e-06	0.4885	0.101	0.041	CTX	MAN1A2	CTX	Monkey	0.0209702	1
1.05134e-06	0.488344	0.116	0.051	CTX	DZIP3	CTX	Monkey	0.014927	1
1.77441e-06	0.488108	0.106	0.045	CTX	ZNF566	CTX	Monkey	0.0251931	1
1.57655e-06	0.486887	0.191	0.107	CTX	WASF1	CTX	Monkey	0.0223839	1
3.37341e-06	0.484766	0.14	0.071	CTX	RBM28	CTX	Monkey	0.0478957	1
2.77579e-06	0.484499	0.234	0.146	CTX	IGFBPL1	CTX	Monkey	0.0394106	1
1.47665e-06	0.48439	0.106	0.045	CTX	ELAVL1	CTX	Monkey	0.0209655	1
9.87231e-07	0.483565	0.109	0.046	CTX	NRIP1	CTX	Monkey	0.0140167	1
1.70966e-06	0.480842	0.108	0.046	CTX	UBE2Q2L	CTX	Monkey	0.0242737	1
1.94011e-06	0.479555	0.28	0.183	CTX	NCOR1	CTX	Monkey	0.0275457	1
4.50568e-07	0.479196	0.336	0.223	CTX	TCEAL2	CTX	Monkey	0.00639717	1
7.16851e-07	0.478506	0.129	0.059	CTX	TP53I11	CTX	Monkey	0.0101779	1
2.92799e-06	0.478054	0.106	0.046	CTX	TSPYL5	CTX	Monkey	0.0415716	1
2.65809e-06	0.477555	0.116	0.053	CTX	EIF2B3	CTX	Monkey	0.0377396	1
8.92942e-07	0.477362	0.414	0.309	CTX	PSMA7	CTX	Monkey	0.012678	1
1.34574e-06	0.475886	0.252	0.155	CTX	GOLGA4	CTX	Monkey	0.0191069	1
2.25759e-06	0.474635	0.226	0.138	CTX	SMAP1	CTX	Monkey	0.0320533	1
6.02153e-07	0.473713	0.109	0.045	CTX	NRCAM	CTX	Monkey	0.00854937	1
3.20872e-06	0.472234	0.144	0.074	CTX	ADAR	CTX	Monkey	0.0455573	1
1.25311e-06	0.471797	0.125	0.057	CTX	RIMS1	CTX	Monkey	0.0177916	1
3.09412e-06	0.470876	0.137	0.068	CTX	WDFY3	CTX	Monkey	0.0439303	1
5.48249e-07	0.468748	0.132	0.06	CTX	GABBR1	CTX	Monkey	0.00778403	1
1.10261e-06	0.464896	0.129	0.06	CTX	RAPGEF2	CTX	Monkey	0.0156549	1
1.83418e-06	0.464508	0.317	0.217	CTX	HNRNPAB	CTX	Monkey	0.0260417	1
3.89473e-07	0.464484	0.167	0.084	CTX	TNKS	CTX	Monkey	0.00552974	1
2.60099e-06	0.462354	0.26	0.167	CTX	ARID1A	CTX	Monkey	0.0369288	1
1.54594e-06	0.46211	0.107	0.045	CTX	PDZD4	CTX	Monkey	0.0219493	1
2.38886e-07	0.46017	0.217	0.121	CTX	UBE2S	CTX	Monkey	0.0033917	1
2.42576e-06	0.459227	0.153	0.079	CTX	PIP4K2B	CTX	Monkey	0.0344409	1
7.47744e-07	0.459134	0.324	0.214	CTX	CDK5R1	CTX	Monkey	0.0106165	1
7.39078e-07	0.458653	0.145	0.07	CTX	FARP1	CTX	Monkey	0.0104934	1
3.48299e-06	0.458623	0.159	0.086	CTX	PNMA2	CTX	Monkey	0.0494515	1
2.59491e-06	0.457916	0.184	0.105	CTX	ZNF445	CTX	Monkey	0.0368425	1
3.17895e-06	0.455215	0.285	0.19	CTX	PPP3CA	CTX	Monkey	0.0451347	1
2.3774e-06	0.454958	0.178	0.099	CTX	URI1	CTX	Monkey	0.0337543	1
4.02095e-07	0.454446	0.113	0.046	CTX	SEL1L	CTX	Monkey	0.00570895	1
1.43682e-06	0.451178	0.164	0.085	CTX	DCTN1	CTX	Monkey	0.0203999	1
4.32042e-07	0.450801	0.166	0.083	CTX	SEC14L1	CTX	Monkey	0.00613413	1
1.5344e-06	0.444369	0.462	0.36	CTX	GNG2	CTX	Monkey	0.0217855	1
1.61189e-06	0.441581	0.369	0.261	CTX	PLK2	CTX	Monkey	0.0228857	1
2.03242e-06	0.440628	0.32	0.217	CTX	TMEFF1	CTX	Monkey	0.0288562	1
3.88363e-07	0.439993	0.106	0.041	CTX	PDCD7	CTX	Monkey	0.00551397	1
2.69721e-06	0.438603	0.27	0.175	CTX	TSPAN3	CTX	Monkey	0.038295	1
2.89704e-06	0.43756	0.182	0.101	CTX	ZC3H6	CTX	Monkey	0.0411321	1
2.02887e-06	0.437542	0.28	0.183	CTX	EVL	CTX	Monkey	0.0288059	1
3.09682e-06	0.437194	0.225	0.138	CTX	SESTD1	CTX	Monkey	0.0439687	1
1.90053e-06	0.435645	0.101	0.041	CTX	B4GALT5	CTX	Monkey	0.0269837	1
2.38951e-06	0.435315	0.143	0.071	CTX	MDM4	CTX	Monkey	0.0339263	1
1.97825e-06	0.435118	0.313	0.209	CTX	CLASP2	CTX	Monkey	0.0280872	1
2.58687e-06	0.434989	0.128	0.061	CTX	ZDHHC21	CTX	Monkey	0.0367284	1
3.48754e-06	0.434602	0.26	0.166	CTX	CLTC	CTX	Monkey	0.0495161	1
1.48669e-06	0.433497	0.246	0.151	CTX	HERC1	CTX	Monkey	0.021108	1
2.59157e-06	0.432535	0.143	0.071	CTX	CHORDC1	CTX	Monkey	0.0367951	1
1.6346e-06	0.424665	0.153	0.078	CTX	HRAS	CTX	Monkey	0.023208	1
1.97817e-06	0.424637	0.123	0.056	CTX	ABCC5	CTX	Monkey	0.0280861	1
1.42914e-06	0.420655	0.107	0.045	CTX	NLGN2	CTX	Monkey	0.020291	1
2.13574e-06	0.418833	0.169	0.09	CTX	ARHGAP28	CTX	Monkey	0.0303232	1
1.82239e-06	0.418653	0.124	0.057	CTX	FBXO9	CTX	Monkey	0.0258742	1
1.39153e-07	0.418222	0.263	0.155	CTX	THRA	CTX	Monkey	0.0019757	1
2.29735e-06	0.414173	0.107	0.046	CTX	NCS1	CTX	Monkey	0.0326177	1
4.38648e-07	0.411429	0.251	0.147	CTX	SPIN1	CTX	Monkey	0.00622793	1
2.87945e-06	0.409513	0.245	0.152	CTX	ZMYND11	CTX	Monkey	0.0408825	1
1.40337e-06	0.408222	0.231	0.137	CTX	CD81	CTX	Monkey	0.0199251	1
1.3583e-06	0.405715	0.175	0.093	CTX	PITHD1	CTX	Monkey	0.0192851	1
2.43936e-08	0.402565	0.575	0.455	CTX	SFPQ	CTX	Monkey	0.00034634	1
2.61768e-06	0.396865	0.1	0.041	CTX	AGPAT3	CTX	Monkey	0.0371658	1
3.31045e-08	0.395387	0.555	0.433	CTX	CRMP1	CTX	Monkey	0.000470018	1
1.74078e-06	0.393034	0.198	0.111	CTX	SUDS3	CTX	Monkey	0.0247156	1
1.95124e-06	0.389461	0.321	0.22	CTX	ATXN10	CTX	Monkey	0.0277038	1
3.11766e-06	0.385073	0.103	0.044	CTX	ZNF248	CTX	Monkey	0.0442645	1
2.54409e-06	0.382598	0.539	0.443	CTX	DPYSL2	CTX	Monkey	0.036121	1
3.06066e-06	0.339167	0.234	0.14	CTX	MAP2K2	CTX	Monkey	0.0434552	1
2.40757e-06	0.326583	0.115	0.051	CTX	GSK3A	CTX	Monkey	0.0341826	1
3.20473e-06	0.315989	0.559	0.455	CTX	YWHAG	CTX	Monkey	0.0455007	1
1.47152e-07	0.314568	0.756	0.699	CTX	TTC3	CTX	Monkey	0.00208926	1
4.12113e-07	0.304152	0.707	0.615	CTX	DDX17	CTX	Monkey	0.00585118	1
1.43417e-06	0.301332	0.744	0.666	CTX	PTMS	CTX	Monkey	0.0203623	1
2.70678e-14	0.914448	0.32	0.168	CGE	RND3	CTX	Monkey	3.40984e-06	100
6.25931e-12	0.815668	0.195	0.083	CGE	S100A10	CTX	Monkey	0.000519702	100
2.09138e-18	0.774104	0.338	0.16	CGE	SP9	CTX	Monkey	7.9846e-06	100
2.18276e-19	0.726485	0.509	0.31	CGE	IFI27L2	CTX	Monkey	2.05158e-07	100
2.3957e-17	0.696927	0.299	0.131	CGE	IER2	CTX	Monkey	0.000160154	100
4.23244e-12	0.67681	0.467	0.313	CGE	NFIA	CTX	Monkey	9.50822e-05	100
2.41493e-19	0.646202	0.468	0.287	CGE	DLX5	CTX	Monkey	0.000295293	100
5.51771e-13	0.585961	0.671	0.531	CGE	FTL	CTX	Monkey	1.12659e-07	100
2.58351e-11	0.49427	0.734	0.629	CGE	YBX1	CTX	Monkey	5.70087e-05	100
3.65861e-16	0.472411	0.844	0.732	CGE	EIF1	CTX	Monkey	4.294e-09	100
5.21573e-32	0.417215	0.994	0.982	CGE	TMSB10	CTX	Monkey	5.98622e-17	100
8.71883e-12	0.843209	0.2	0.087	CGE	APOE	CTX	Monkey	0.000125248	99
2.46972e-20	0.736148	0.264	0.09	CGE	FOS	CTX	Monkey	6.90135e-07	99
3.83487e-10	0.695512	0.27	0.147	CGE	DBI	CTX	Monkey	0.00075283	99
1.11038e-16	0.601022	0.457	0.271	CGE	PNRC1	CTX	Monkey	0.000502921	99
7.44367e-09	0.427554	0.721	0.623	CGE	EEF1G	CTX	Monkey	0.000696281	99
2.13184e-09	0.600375	0.325	0.201	CGE	SYNE2	CTX	Monkey	0.0018758	98
2.25411e-08	0.494587	0.517	0.401	CGE	HNRNPA1	CTX	Monkey	0.000585182	98
1.22705e-13	0.479608	0.607	0.457	CGE	TOMM7	CTX	Monkey	0.00041834	97
1.61675e-06	0.373745	0.855	0.81	CGE	NACA	CTX	Monkey	0.000925416	96
5.38513e-17	0.661041	0.379	0.208	CGE	HMGN2	CTX	Monkey	0.00160688	94
8.76321e-12	0.308526	0.948	0.89	CGE	UBA52	CTX	Monkey	2.9839e-07	94
9.34136e-09	0.51721	0.449	0.328	CGE	DDAH2	CTX	Monkey	0.00227102	93
6.68817e-09	0.615641	0.307	0.187	CGE	PTN	CTX	Monkey	0.00259194	88
2.98548e-08	0.283533	0.897	0.895	CGE	TUBB	CTX	Monkey	0.000581216	87
2.30342e-08	0.492779	0.557	0.457	CGE	TPT1	CTX	Monkey	0.0030175	85
2.74373e-08	0.645637	0.13	0.053	CGE	JUNB	CTX	Monkey	0.00404497	83
3.08746e-07	0.807532	0.128	0.057	CGE	RBP1	CTX	Monkey	0.00363017	79
2.37692e-08	0.478293	0.463	0.339	CGE	TUBA1B	CTX	Monkey	0.00358464	79
7.26225e-08	0.55162	0.294	0.183	CGE	SOX5	CTX	Monkey	0.00576766	77
1.97113e-12	0.518426	0.372	0.223	CGE	EPHA5	CTX	Monkey	0.00375618	77
2.56763e-08	0.316394	0.813	0.717	CGE	MARCKSL1	CTX	Monkey	0.00517699	76
1.01245e-07	0.434938	0.508	0.386	CGE	HNRNPA0	CTX	Monkey	0.00649647	75
1.07011e-06	0.67177	0.118	0.055	CGE	TMEM123	CTX	Monkey	0.0057797	74
2.015e-07	0.457337	0.44	0.326	CGE	MYL6	CTX	Monkey	0.00723944	70
6.14506e-10	0.621351	0.197	0.091	CGE	GNS	CTX	Monkey	0.00474492	66
3.67359e-08	0.344752	0.72	0.603	CGE	BTG1	CTX	Monkey	0.00770315	63
1.17577e-08	0.447312	0.46	0.336	CGE	DLX2	CTX	Monkey	0.00696983	62
8.97336e-12	0.264973	0.864	0.775	CGE	FAU	CTX	Monkey	0.000895397	58
2.82643e-06	0.342724	0.669	0.599	CGE	PFDN5	CTX	Monkey	0.00662364	57
9.74806e-09	0.257617	0.978	0.98	CGE	TUBA1A	CTX	Monkey	0.00105454	56
3.19441e-06	0.528957	0.301	0.208	CGE	PDZRN3	CTX	Monkey	0.00841403	51
2.97034e-07	0.431627	0.489	0.37	CGE	SERF2	CTX	Monkey	0.00780683	51
6.10323e-08	0.429172	0.418	0.295	CGE	BCL11B	CTX	Monkey	0.00924461	50
3.75241e-08	0.255062	0.948	0.941	CGE	TUBB2B	CTX	Monkey	0.00155774	48
6.47816e-10	0.755327	0.106	0.031	CGE	S100B	CTX	Monkey	1.12179e-05	47
2.74535e-06	0.659708	0.205	0.125	CGE	PCDH17	CTX	Monkey	0.00712851	45
7.55285e-07	0.265043	0.876	0.832	CGE	SOX2	CTX	Monkey	0.00588795	45
6.61633e-08	0.607615	0.197	0.103	CGE	DUSP1	CTX	Monkey	0.00721153	44
2.28656e-06	0.582207	0.246	0.157	CGE	ARL4D	CTX	Monkey	0.0112474	40
3.07384e-11	0.322549	0.776	0.644	CGE	DYNLL1	CTX	Monkey	0.00951234	38
1.77472e-08	0.5557	0.198	0.105	CGE	FAM210B	CTX	Monkey	0.0121444	32
3.85472e-07	0.421508	0.425	0.318	CGE	ARX	CTX	Monkey	0.0144397	31
3.30061e-07	0.352372	0.618	0.538	CGE	GABARAP	CTX	Monkey	0.00918057	28
6.70732e-09	0.539054	0.169	0.078	CGE	ZEB1	CTX	Monkey	0.00471933	27
2.78069e-06	0.515197	0.264	0.175	CGE	DCN	CTX	Monkey	0.00907037	27
5.90323e-07	0.361236	0.169	0.087	CGE	EGR1	CTX	Monkey	0.00512743	25
3.12945e-08	0.524892	0.16	0.074	CGE	B2M	CTX	Monkey	0.00958063	23
2.57821e-06	0.262688	0.826	0.79	CGE	SRP14	CTX	Monkey	0.0137811	22
1.25313e-06	0.335468	0.67	0.583	CGE	SUMO2	CTX	Monkey	0.00941325	21
1.4696e-06	0.537619	0.372	0.276	CGE	CCND2	CTX	Monkey	0.0146184	19
7.78852e-07	0.421303	0.452	0.347	CGE	COMMD6	CTX	Monkey	0.0113763	19
8.91215e-07	0.381544	0.577	0.474	CGE	FTH1	CTX	Monkey	0.0112699	17
1.67277e-06	0.372868	0.467	0.361	CGE	TMSB15A	CTX	Monkey	0.0142184	17
1.59453e-06	0.650572	0.103	0.044	CGE	CST3	CTX	Monkey	0.00909129	16
4.7947e-08	0.583495	0.114	0.044	CGE	LITAF	CTX	Monkey	0.00719326	16
1.53189e-09	0.442612	0.395	0.274	CGE	BTF3	CTX	Monkey	0.010056	15
1.23235e-06	0.439555	0.485	0.377	CGE	NDUFS5	CTX	Monkey	0.00863709	15
4.25494e-07	0.79228	0.1	0.039	CGE	HMGB2	CTX	Monkey	0.0123835	14
9.63304e-07	0.537458	0.254	0.164	CGE	DHRS7	CTX	Monkey	0.0139185	14
1.40703e-06	0.418998	0.4	0.308	CGE	SNRPE	CTX	Monkey	0.0135587	13
3.36671e-07	0.386141	0.482	0.378	CGE	PPDPF	CTX	Monkey	0.0143292	13
1.7646e-06	0.762908	0.405	0.306	CGE	EEF1A1	CTX	Monkey	0.0239913	12
2.99883e-06	0.520665	0.21	0.13	CGE	MEX3B	CTX	Monkey	0.0219162	12
3.24734e-06	0.539024	0.203	0.121	CGE	INSM1	CTX	Monkey	0.0206515	11
1.67836e-06	0.489121	0.29	0.191	CGE	CYTH2	CTX	Monkey	0.00820087	11
2.26482e-06	0.42452	0.415	0.316	CGE	SRSF3	CTX	Monkey	0.0218461	11
2.13007e-06	0.512057	0.228	0.141	CGE	VGLL4	CTX	Monkey	0.01457	10
3.60287e-08	0.459857	0.479	0.372	CGE	PFN2	CTX	Monkey	0.00704257	10
2.76076e-06	0.689094	0.318	0.228	CGE	JUND	CTX	Monkey	0.0120551	9
1.76984e-06	0.350381	0.615	0.514	CGE	OAZ1	CTX	Monkey	0.0107481	9
2.17887e-06	0.51094	0.21	0.126	CGE	CENPC	CTX	Monkey	0.0200916	8
2.9659e-07	0.500692	0.222	0.129	CGE	TBCC	CTX	Monkey	0.0168486	8
3.13427e-06	0.38053	0.539	0.431	CGE	NFIX	CTX	Monkey	0.016832	8
1.23395e-09	0.58428	0.155	0.064	CGE	MSI2	CTX	Monkey	0.0153802	6
7.34073e-09	0.526046	0.161	0.072	CGE	TAX1BP3	CTX	Monkey	0.0203966	6
2.51375e-06	0.509822	0.246	0.16	CGE	WBP4	CTX	Monkey	0.0142017	6
3.2034e-06	0.46394	0.416	0.32	CGE	PAIP2	CTX	Monkey	0.0161854	6
7.68286e-07	0.417974	0.501	0.4	CGE	COX7A2	CTX	Monkey	0.0150691	6
6.55081e-08	0.319528	0.644	0.564	CGE	DYNC1I2	CTX	Monkey	0.0249648	6
1.04688e-06	0.493672	0.252	0.159	CGE	MRPL51	CTX	Monkey	0.0135891	5
2.82198e-06	0.452945	0.41	0.316	CGE	ARRDC3	CTX	Monkey	0.0284566	5
2.69678e-06	0.310602	0.675	0.582	CGE	HNRNPK	CTX	Monkey	0.0183722	5
2.22299e-07	0.560552	0.218	0.13	CGE	WSB1	CTX	Monkey	0.00724317	4
7.12989e-07	0.525163	0.206	0.123	CGE	POLR1D	CTX	Monkey	0.028844	4
1.94758e-06	0.492064	0.105	0.045	CGE	PBX3	CTX	Monkey	0.0154144	4
4.15409e-07	0.414597	0.463	0.352	CGE	NDUFB2	CTX	Monkey	0.00993433	4
1.63651e-06	0.413641	0.454	0.345	CGE	SLIRP	CTX	Monkey	0.0145514	4
1.98408e-06	0.40029	0.439	0.333	CGE	HMGN1	CTX	Monkey	0.0122066	4
1.46764e-06	0.282396	0.693	0.582	CGE	ZNF704	CTX	Monkey	0.0102935	4
2.21112e-06	0.658018	0.202	0.121	CGE	POU3F4	CTX	Monkey	0.0104713	3
1.57611e-06	0.568573	0.155	0.082	CGE	TOX3	CTX	Monkey	0.00760122	3
7.3776e-09	0.550726	0.126	0.048	CGE	MAGED4B	CTX	Monkey	0.0120292	3
9.50893e-07	0.545497	0.137	0.067	CGE	CALD1	CTX	Monkey	0.0194414	3
1.48935e-06	0.512551	0.34	0.243	CGE	SRSF5	CTX	Monkey	0.00940102	3
2.28434e-06	0.47739	0.114	0.052	CGE	GNG5	CTX	Monkey	0.0169061	3
2.71076e-07	0.45795	0.229	0.136	CGE	CARHSP1	CTX	Monkey	0.0122858	3
2.17256e-07	0.442469	0.291	0.183	CGE	BUD31	CTX	Monkey	0.0164719	3
1.39483e-07	0.43437	0.357	0.249	CGE	EIF3F	CTX	Monkey	0.00734565	3
2.07186e-06	0.286027	0.792	0.714	CGE	UBB	CTX	Monkey	0.0110206	3
5.5828e-08	0.673632	0.102	0.037	CGE	AKAP12	CTX	Monkey	0.00594757	2
1.7714e-06	0.535355	0.166	0.09	CGE	FBL	CTX	Monkey	0.0132401	2
3.46608e-06	0.530206	0.159	0.086	CGE	TSC22D2	CTX	Monkey	0.0468907	2
2.61864e-06	0.49509	0.121	0.057	CGE	DYNLRB2	CTX	Monkey	0.0200129	2
2.40565e-06	0.492229	0.236	0.149	CGE	TPGS2	CTX	Monkey	0.01815	2
5.12472e-08	0.471541	0.138	0.06	CGE	MDK	CTX	Monkey	0.012701	2
2.25229e-06	0.46709	0.287	0.189	CGE	CCDC28B	CTX	Monkey	0.028607	2
1.2548e-06	0.459056	0.274	0.178	CGE	RCN2	CTX	Monkey	0.0192466	2
6.89116e-07	0.417957	0.366	0.261	CGE	TAGLN3	CTX	Monkey	0.00886019	2
1.02983e-06	0.411958	0.29	0.185	CGE	TMSB15B	CTX	Monkey	0.00877987	2
1.21454e-08	0.586883	0.174	0.083	CGE	CTBP2	CTX	Monkey	0.000172441	1
8.22568e-08	0.579458	0.199	0.108	CGE	ZNF462	CTX	Monkey	0.00116788	1
1.41577e-06	0.571857	0.17	0.092	CGE	NDUFA7	CTX	Monkey	0.0201011	1
1.84949e-06	0.549463	0.113	0.051	CGE	CDKAL1	CTX	Monkey	0.026259	1
3.14269e-06	0.539074	0.248	0.166	CGE	RHEB	CTX	Monkey	0.0446199	1
1.4241e-06	0.536118	0.126	0.059	CGE	TAC3	CTX	Monkey	0.0202194	1
1.95068e-06	0.53459	0.102	0.044	CGE	FLNA	CTX	Monkey	0.0276958	1
5.99459e-07	0.524949	0.305	0.206	CGE	OST4	CTX	Monkey	0.00851112	1
2.26577e-06	0.520235	0.145	0.075	CGE	NDRG2	CTX	Monkey	0.0321693	1
5.38445e-07	0.517338	0.27	0.171	CGE	SOX1	CTX	Monkey	0.00764485	1
1.58708e-06	0.515054	0.246	0.157	CGE	HCFC1R1	CTX	Monkey	0.0225334	1
8.71715e-07	0.509832	0.136	0.066	CGE	TOB1	CTX	Monkey	0.0123766	1
4.38143e-07	0.501409	0.185	0.1	CGE	CLIC4	CTX	Monkey	0.00622075	1
1.0048e-06	0.498779	0.229	0.139	CGE	SRSF6	CTX	Monkey	0.0142661	1
1.3002e-07	0.491936	0.37	0.261	CGE	SLAIN1	CTX	Monkey	0.00184603	1
5.50906e-07	0.481957	0.343	0.241	CGE	LAGE3	CTX	Monkey	0.00782177	1
4.40226e-07	0.481876	0.207	0.118	CGE	ILF2	CTX	Monkey	0.00625033	1
2.21855e-06	0.477793	0.172	0.097	CGE	SP3	CTX	Monkey	0.0314989	1
4.90364e-07	0.475584	0.367	0.263	CGE	SNRPD1	CTX	Monkey	0.00696219	1
3.51503e-06	0.473641	0.191	0.113	CGE	PFN1	CTX	Monkey	0.0499064	1
8.62451e-07	0.471501	0.207	0.122	CGE	UPF2	CTX	Monkey	0.0122451	1
4.29548e-07	0.471178	0.274	0.17	CGE	GNAI2	CTX	Monkey	0.00609872	1
1.25974e-06	0.46128	0.377	0.285	CGE	NDUFA1	CTX	Monkey	0.0178858	1
1.86583e-06	0.460827	0.307	0.207	CGE	CSTB	CTX	Monkey	0.0264911	1
2.09192e-06	0.454629	0.184	0.105	CGE	SNRPF	CTX	Monkey	0.0297011	1
1.86662e-06	0.441683	0.152	0.078	CGE	DLX6	CTX	Monkey	0.0265023	1
2.7873e-06	0.433012	0.364	0.267	CGE	UBXN1	CTX	Monkey	0.0395741	1
2.70711e-06	0.42381	0.21	0.125	CGE	NAP1L1	CTX	Monkey	0.0384355	1
7.59403e-07	0.395412	0.509	0.415	CGE	SMDT1	CTX	Monkey	0.010782	1
2.35378e-06	0.384071	0.618	0.522	CGE	ITM2B	CTX	Monkey	0.033419	1
2.83048e-06	0.380706	0.397	0.3	CGE	CWC15	CTX	Monkey	0.0401872	1
1.40299e-06	0.369479	0.444	0.333	CGE	WDR83OS	CTX	Monkey	0.0199197	1
3.13382e-06	0.343549	0.654	0.572	CGE	DPYSL3	CTX	Monkey	0.044494	1
1.52805e-07	0.341883	0.723	0.623	CGE	HNRNPDL	CTX	Monkey	0.00216953	1
3.39149e-06	0.264863	0.711	0.623	CGE	MLLT11	CTX	Monkey	0.0481523	1
9.02668e-09	0.324054	0.938	0.856	LGE	SOX2	LGE	Monkey	0.00587254	78
2.96837e-07	1.04024	0.132	0.042	LGE	CRABP1	LGE	Monkey	0.00617796	71
8.86944e-07	0.54771	0.46	0.318	LGE	RND3	LGE	Monkey	0.00849114	60
1.02786e-13	0.355877	0.918	0.792	LGE	HSP90AA1	LGE	Monkey	0.00888269	29
3.90947e-07	0.513091	0.572	0.424	LGE	DLX5	LGE	Monkey	0.0144545	24
2.46274e-08	1.64345	0.112	0.024	LGE	HSPA1A	LGE	Monkey	0.011591	19
3.47753e-07	0.475957	0.608	0.472	LGE	IFI27L2	LGE	Monkey	0.0184258	7
2.0349e-06	0.66562	0.142	0.052	LGE	BTG2	LGE	Monkey	0.018945	6
7.60799e-08	0.592861	0.398	0.236	LGE	CITED2	LGE	Monkey	0.0156341	5
6.35133e-09	0.524456	0.6	0.43	LGE	PFN2	LGE	Monkey	0.0168675	4
4.72101e-08	0.437252	0.78	0.676	LGE	BTG1	LGE	Monkey	0.00415766	4
3.26642e-07	0.339485	0.904	0.806	LGE	HSP90AB1	LGE	Monkey	0.0206432	4
1.69793e-06	0.638921	0.264	0.14	LGE	SLC10A4	LGE	Monkey	0.0154934	3
1.46839e-06	0.593578	0.36	0.224	LGE	CENPV	LGE	Monkey	0.0106178	2
1.00037e-06	0.525974	0.528	0.392	LGE	SRRM2	LGE	Monkey	0.0113248	2
1.34102e-06	0.495101	0.532	0.366	LGE	PNRC1	LGE	Monkey	0.0157644	2
2.47821e-06	0.390317	0.804	0.712	LGE	BASP1	LGE	Monkey	0.0178455	2
3.29672e-06	0.280411	0.956	0.876	LGE	TUBB	LGE	Monkey	0.0235361	2
1.42343e-06	1.16428	0.106	0.03	LGE	HSPB1	LGE	Monkey	0.0202099	1
3.74416e-07	0.695627	0.21	0.096	LGE	TGOLN2	LGE	Monkey	0.00531596	1
1.44573e-06	0.690385	0.154	0.06	LGE	TRMT10C	LGE	Monkey	0.0205265	1
7.70036e-07	0.65636	0.36	0.224	LGE	SOX5	LGE	Monkey	0.010933	1
1.79735e-06	0.620373	0.198	0.09	LGE	EPC2	LGE	Monkey	0.0255187	1
2.61955e-06	0.607696	0.29	0.166	LGE	ID4	LGE	Monkey	0.0371923	1
2.55897e-06	0.592269	0.276	0.152	LGE	FAM210B	LGE	Monkey	0.0363323	1
3.03064e-06	0.576881	0.206	0.098	LGE	HBS1L	LGE	Monkey	0.043029	1
1.05365e-07	0.572446	0.486	0.338	LGE	SARAF	LGE	Monkey	0.00149598	1
1.75907e-08	0.559666	0.536	0.368	LGE	PSIP1	LGE	Monkey	0.000249753	1
3.42901e-07	0.539832	0.412	0.258	LGE	KAT6B	LGE	Monkey	0.00486851	1
3.28874e-06	0.513927	0.444	0.3	LGE	DCLK2	LGE	Monkey	0.0466936	1
1.3296e-07	0.505808	0.57	0.406	LGE	DLX2	LGE	Monkey	0.00188777	1
1.93213e-06	0.503189	0.434	0.288	LGE	SP9	LGE	Monkey	0.0274325	1
2.91528e-07	0.463603	0.552	0.404	LGE	KIF2A	LGE	Monkey	0.00413911	1
1.16314e-06	0.34508	0.818	0.682	LGE	RTN4	LGE	Monkey	0.0165143	1
3.59069e-07	0.280985	0.922	0.814	LGE	NFIB	LGE	Monkey	0.00509807	1
9.41905e-10	1.07704	0.158	0.042	CGE	LIMCH1	LGE	Monkey	0.00395876	79
4.53235e-08	0.756215	0.416	0.27	CGE	MEF2C	LGE	Monkey	0.0088602	65
2.64428e-10	0.526524	0.778	0.638	CGE	YBX1	LGE	Monkey	0.00703226	53
5.88071e-09	0.424781	0.81	0.738	CGE	MARCKSL1	LGE	Monkey	0.0106458	35
2.26979e-06	0.97216	0.214	0.11	CGE	CALB2	LGE	Monkey	0.0176073	30
5.71396e-09	1.13475	0.678	0.586	CGE	CCK	LGE	Monkey	0.010568	27
1.51772e-08	0.804956	0.416	0.27	CGE	SYNPR	LGE	Monkey	0.0161771	23
3.73688e-10	0.451277	0.746	0.626	CGE	BEX1	LGE	Monkey	0.00929811	17
1.14088e-12	1.84117	0.126	0.012	CGE	CRH	LGE	Monkey	3.30049e-06	15
8.32138e-07	0.689218	0.39	0.252	CGE	STMN4	LGE	Monkey	0.0192602	14
3.03129e-06	0.819362	0.192	0.092	CGE	GABRB2	LGE	Monkey	0.0121276	10
3.76922e-07	0.871996	0.114	0.03	CGE	SLC25A6	LGE	Monkey	0.0175444	5
4.15915e-09	0.846416	0.12	0.024	CGE	ASCL1	LGE	Monkey	0.00953794	4
2.25106e-08	0.842869	0.102	0.018	CGE	CHCHD2	LGE	Monkey	0.00980027	4
4.68001e-09	1.29658	0.21	0.084	CGE	PCP4	LGE	Monkey	0.0206636	3
1.96388e-06	0.563578	0.546	0.44	CGE	TSC22D1	LGE	Monkey	0.0181661	3
8.9303e-07	0.832065	0.158	0.064	CGE	DNER	LGE	Monkey	0.0245638	2
2.81893e-06	0.793464	0.112	0.036	CGE	CHD5	LGE	Monkey	0.0441266	2
2.86252e-06	0.694311	0.198	0.094	CGE	NRXN2	LGE	Monkey	0.0428938	2
2.35014e-07	0.502082	0.63	0.492	CGE	CKB	LGE	Monkey	0.00419684	2
1.53179e-07	0.905649	0.116	0.03	CGE	COX7C	LGE	Monkey	0.00217483	1
3.28702e-08	0.802811	0.126	0.032	CGE	VANGL2	LGE	Monkey	0.000466691	1
1.12393e-06	0.780508	0.104	0.028	CGE	PCDH10	LGE	Monkey	0.0159575	1
3.0832e-06	0.767598	0.15	0.062	CGE	CHCHD10	LGE	Monkey	0.0437753	1
9.66897e-07	0.687834	0.102	0.026	CGE	MMD	LGE	Monkey	0.013728	1
1.60918e-06	0.656803	0.378	0.248	CGE	NDUFA3	LGE	Monkey	0.0228471	1
3.59201e-08	0.593137	0.532	0.39	CGE	COX7A2	LGE	Monkey	0.000509994	1
3.15076e-06	0.590178	0.482	0.348	CGE	NDUFA4	LGE	Monkey	0.0447345	1
9.88327e-07	0.588945	0.35	0.212	CGE	GPM6B	LGE	Monkey	0.0140323	1
2.74606e-06	0.423756	0.716	0.634	CGE	ZNF428	LGE	Monkey	0.0389886	1
1.8392e-17	0.68847	0.539	0.261	MGE	CAMK2N1	MGE	Monkey	0.000235469	100
1.32199e-14	0.666936	0.538	0.282	MGE	PPP1R14B	MGE	Monkey	0.000491071	100
4.58349e-26	0.558477	0.945	0.789	MGE	HSP90AA1	MGE	Monkey	2.51608e-07	100
1.78395e-16	0.79504	0.444	0.203	MGE	ID4	MGE	Monkey	0.000517527	99
3.90946e-14	0.534564	0.641	0.398	MGE	SRRM2	MGE	Monkey	0.00145835	98
1.91802e-13	0.432773	0.867	0.707	MGE	BASP1	MGE	Monkey	0.00191811	98
4.75735e-10	0.887971	0.308	0.141	MGE	TMPO	MGE	Monkey	0.00169796	97
3.74444e-12	0.631501	0.432	0.227	MGE	CENPV	MGE	Monkey	0.00232189	90
7.75466e-09	0.300158	0.991	0.955	MGE	ACTG1	MGE	Monkey	0.00381349	88
3.064e-16	0.408317	0.848	0.675	MGE	HNRNPDL	MGE	Monkey	0.00605803	83
5.76237e-09	0.606255	0.113	0.023	MGE	PEG10	MGE	Monkey	0.00617508	81
2.15416e-07	0.581873	0.291	0.147	MGE	UBE2S	MGE	Monkey	0.0046958	81
4.10302e-09	0.510535	0.541	0.34	MGE	CHD2	MGE	Monkey	0.00453028	76
4.37352e-10	0.491866	0.509	0.291	MGE	SRSF5	MGE	Monkey	0.00332781	71
1.41014e-06	0.535263	0.195	0.086	MGE	YTHDF2	MGE	Monkey	0.00698942	70
3.499e-07	0.569702	0.256	0.126	MGE	TPM4	MGE	Monkey	0.00728084	62
4.88006e-08	0.485545	0.476	0.299	MGE	JUND	MGE	Monkey	0.00815062	59
1.27957e-06	0.622539	0.165	0.068	MGE	BTG2	MGE	Monkey	0.00723465	58
1.3273e-06	0.540089	0.212	0.098	MGE	BCL7C	MGE	Monkey	0.0103738	55
2.26794e-08	0.676417	0.115	0.026	MGE	CDK6	MGE	Monkey	0.00235107	53
8.24194e-07	0.790784	0.167	0.07	MGE	CHCHD2	MGE	Monkey	0.0072174	51
5.79163e-07	0.61233	0.258	0.13	MGE	ANP32E	MGE	Monkey	0.00779001	51
4.3866e-07	0.517761	0.357	0.199	MGE	MTPN	MGE	Monkey	0.00860779	51
7.38526e-09	0.532342	0.227	0.09	MGE	GNB1	MGE	Monkey	0.0102738	50
1.74343e-06	0.514644	0.107	0.032	MGE	SCD5	MGE	Monkey	0.00984195	49
4.8701e-08	0.496354	0.289	0.137	MGE	HES6	MGE	Monkey	0.0122226	49
9.67246e-08	0.465042	0.122	0.034	MGE	EIF4E	MGE	Monkey	0.00895567	48
4.46225e-07	0.487347	0.269	0.139	MGE	YPEL3	MGE	Monkey	0.0116088	47
1.38107e-11	1.3806	0.133	0.023	MGE	HSPA1A	MGE	Monkey	0.00648561	46
4.01372e-07	0.605697	0.137	0.047	MGE	SLC38A2	MGE	Monkey	0.00836703	46
1.92462e-07	0.558382	0.31	0.165	MGE	PABPN1	MGE	Monkey	0.00973945	46
6.38767e-09	0.315069	0.947	0.82	MGE	HSP90AB1	MGE	Monkey	0.00765003	44
1.03939e-09	0.540138	0.224	0.085	MGE	ENHO	MGE	Monkey	0.00935711	43
3.33995e-07	0.477192	0.147	0.051	MGE	ELAVL1	MGE	Monkey	0.0103827	42
1.35058e-06	0.476438	0.434	0.271	MGE	GAD2	MGE	Monkey	0.0101579	42
1.99539e-06	0.475828	0.517	0.355	MGE	XRCC5	MGE	Monkey	0.0106026	41
8.81209e-09	0.714463	0.132	0.034	MGE	SMC4	MGE	Monkey	0.0100203	40
2.47403e-07	0.605448	0.278	0.143	MGE	SLC10A4	MGE	Monkey	0.0124174	39
1.81739e-06	0.468119	0.622	0.438	MGE	POU3F3	MGE	Monkey	0.00853426	37
1.4157e-09	0.448043	0.63	0.419	MGE	QKI	MGE	Monkey	0.0134427	37
1.90752e-06	0.441922	0.299	0.162	MGE	BRI3	MGE	Monkey	0.0134032	37
5.69411e-08	0.498793	0.274	0.13	MGE	TRIM24	MGE	Monkey	0.00992958	36
4.08021e-07	0.900223	0.171	0.07	MGE	SLC25A6	MGE	Monkey	0.0117916	35
1.53324e-06	0.518577	0.335	0.197	MGE	ODC1	MGE	Monkey	0.00965369	35
2.61011e-07	0.494421	0.429	0.265	MGE	CNBP	MGE	Monkey	0.00773447	35
8.79561e-07	0.493042	0.109	0.03	MGE	CENPJ	MGE	Monkey	0.0114206	33
1.12119e-07	0.800268	0.156	0.056	MGE	PCNA	MGE	Monkey	0.00731947	31
5.1408e-07	0.51531	0.103	0.026	MGE	MCM7	MGE	Monkey	0.00649303	31
2.61529e-06	0.503355	0.22	0.107	MGE	KRR1	MGE	Monkey	0.0156676	30
1.33283e-06	0.511229	0.25	0.126	MGE	TOX3	MGE	Monkey	0.00812803	29
2.81437e-06	0.358192	0.846	0.741	MGE	HNRNPA2B1	MGE	Monkey	0.00854218	29
2.06325e-06	0.49973	0.197	0.09	MGE	G3BP1	MGE	Monkey	0.0114086	28
1.98946e-07	0.41492	0.513	0.325	MGE	CCT2	MGE	Monkey	0.0121795	28
7.18532e-09	0.628638	0.1	0.017	MGE	HELLS	MGE	Monkey	0.00172171	27
9.66439e-07	0.590794	0.256	0.133	MGE	ENC1	MGE	Monkey	0.0123492	27
1.64681e-08	0.622131	0.182	0.066	MGE	TFDP2	MGE	Monkey	0.0192836	26
5.00121e-08	0.460353	0.254	0.115	MGE	LBR	MGE	Monkey	0.0177969	26
3.3609e-06	0.455294	0.212	0.1	MGE	BRD7	MGE	Monkey	0.00798554	26
9.89966e-07	0.424866	0.692	0.532	MGE	TPT1	MGE	Monkey	0.0116809	26
6.07923e-07	0.469083	0.415	0.252	MGE	RBM3	MGE	Monkey	0.0113252	25
3.43627e-06	0.435552	0.579	0.406	MGE	RBM39	MGE	Monkey	0.0121156	25
1.25308e-06	0.419897	0.615	0.468	MGE	HNRNPA3	MGE	Monkey	0.0138487	25
6.94163e-07	0.520746	0.192	0.083	MGE	HERPUD1	MGE	Monkey	0.0111609	24
3.60063e-07	0.492667	0.395	0.231	MGE	DDX6	MGE	Monkey	0.0088418	24
1.10762e-06	0.5465	0.105	0.03	MGE	LIN7C	MGE	Monkey	0.0128212	23
5.98571e-10	0.527064	0.436	0.246	MGE	NASP	MGE	Monkey	0.00896143	23
4.10692e-07	0.465094	0.489	0.306	MGE	SH3BGRL3	MGE	Monkey	0.00967519	22
3.27828e-07	0.461231	0.259	0.126	MGE	NSA2	MGE	Monkey	0.0164226	22
1.70487e-07	0.445766	0.551	0.391	MGE	KHDRBS1	MGE	Monkey	0.0140429	22
3.05604e-06	0.422461	0.524	0.361	MGE	MAP4K4	MGE	Monkey	0.0124174	22
1.13697e-06	0.766399	0.177	0.079	MGE	RPA3	MGE	Monkey	0.0125865	20
4.84057e-08	0.53169	0.186	0.071	MGE	IRS2	MGE	Monkey	0.00864575	20
5.86835e-08	0.491988	0.265	0.126	MGE	TXNL4A	MGE	Monkey	0.0143773	20
9.21804e-11	0.598307	0.113	0.015	MGE	CENPU	MGE	Monkey	0.00704869	19
1.73392e-06	0.579338	0.143	0.055	MGE	HMGA1	MGE	Monkey	0.0110206	19
1.7629e-07	0.480135	0.173	0.066	MGE	HDGF	MGE	Monkey	0.0106509	19
4.22513e-08	0.434793	0.173	0.062	MGE	PAICS	MGE	Monkey	0.0113404	19
1.18603e-06	0.42333	0.145	0.053	MGE	MEST	MGE	Monkey	0.0119636	19
1.51208e-07	0.535193	0.177	0.068	MGE	NES	MGE	Monkey	0.0159238	18
3.20727e-06	0.496532	0.135	0.051	MGE	GNG4	MGE	Monkey	0.0175264	18
6.7172e-07	0.492567	0.408	0.25	MGE	ARHGAP21	MGE	Monkey	0.0119278	18
9.80127e-08	0.465229	0.293	0.147	MGE	ATP6V1G1	MGE	Monkey	0.0142311	18
3.51902e-06	0.455018	0.28	0.156	MGE	OLA1	MGE	Monkey	0.0154114	18
3.29221e-09	0.625084	0.147	0.039	MGE	SLBP	MGE	Monkey	0.0157351	17
1.39243e-06	0.534953	0.235	0.117	MGE	SMC1A	MGE	Monkey	0.0143849	17
3.97828e-07	0.450197	0.211	0.09	MGE	CUX1	MGE	Monkey	0.0130418	17
5.3758e-07	1.23815	0.182	0.081	MGE	HMGB2	MGE	Monkey	0.00856617	16
8.27294e-07	0.499236	0.258	0.132	MGE	BRD4	MGE	Monkey	0.0162647	16
9.1549e-07	0.485975	0.346	0.199	MGE	NDN	MGE	Monkey	0.017051	16
8.03824e-07	0.492025	0.314	0.169	MGE	KDM1A	MGE	Monkey	0.0141128	15
6.46926e-07	0.482721	0.105	0.028	MGE	SOX9	MGE	Monkey	0.0133894	15
5.47914e-07	0.445707	0.248	0.12	MGE	DAD1	MGE	Monkey	0.0196617	15
1.67039e-06	0.434965	0.156	0.06	MGE	COX7C	MGE	Monkey	0.018445	15
3.60716e-07	0.63293	0.126	0.039	MGE	RNASEH2B	MGE	Monkey	0.0115877	14
4.83077e-08	0.496162	0.226	0.098	MGE	ANP32A	MGE	Monkey	0.0128555	14
2.89295e-07	0.478519	0.158	0.058	MGE	GMPS	MGE	Monkey	0.0115985	14
1.20904e-06	0.478092	0.291	0.154	MGE	RHOBTB3	MGE	Monkey	0.0194138	14
4.24209e-07	0.465479	0.398	0.235	MGE	GNAI2	MGE	Monkey	0.00574538	14
2.06274e-06	0.585596	0.289	0.162	MGE	IGFBPL1	MGE	Monkey	0.0137735	13
1.30149e-07	0.54981	0.258	0.122	MGE	ASAP1	MGE	Monkey	0.0135842	13
3.08563e-08	0.536432	0.201	0.081	MGE	USP7	MGE	Monkey	0.01538	13
2.46303e-06	0.45479	0.274	0.15	MGE	PHAX	MGE	Monkey	0.0194882	13
3.08074e-06	0.434764	0.122	0.041	MGE	SAP30	MGE	Monkey	0.0185693	13
8.64478e-07	0.405267	0.201	0.088	MGE	PRTFDC1	MGE	Monkey	0.0121666	13
8.63019e-08	0.984276	0.128	0.038	MGE	TOP2A	MGE	Monkey	0.014032	12
1.44982e-06	0.867636	0.115	0.036	MGE	CENPF	MGE	Monkey	0.0137201	12
3.23113e-06	0.52905	0.169	0.073	MGE	RRM1	MGE	Monkey	0.0215713	12
6.25897e-07	0.528827	0.248	0.12	MGE	AUTS2	MGE	Monkey	0.0141424	12
1.06482e-06	0.527972	0.284	0.15	MGE	SMARCC1	MGE	Monkey	0.0141874	12
2.02513e-06	0.503565	0.18	0.079	MGE	HNRNPL	MGE	Monkey	0.016773	12
2.35079e-06	0.477612	0.504	0.353	MGE	HNRNPD	MGE	Monkey	0.0122841	12
7.14934e-07	0.460838	0.162	0.062	MGE	SLC38A1	MGE	Monkey	0.0137491	12
2.92214e-06	0.438803	0.113	0.036	MGE	CCSAP	MGE	Monkey	0.0185707	12
1.26495e-07	0.43809	0.244	0.111	MGE	BNIP3L	MGE	Monkey	0.0120204	12
3.39065e-06	0.557564	0.22	0.109	MGE	TMEM123	MGE	Monkey	0.0235536	11
2.31632e-07	0.510788	0.297	0.152	MGE	PRKDC	MGE	Monkey	0.0187174	11
2.53884e-06	0.502582	0.233	0.115	MGE	COPB2	MGE	Monkey	0.0233101	11
2.31448e-06	0.49902	0.218	0.105	MGE	HOOK3	MGE	Monkey	0.010982	11
2.0771e-06	0.473426	0.476	0.335	MGE	DEK	MGE	Monkey	0.0141019	11
1.88839e-06	0.469139	0.207	0.096	MGE	WASL	MGE	Monkey	0.0241006	11
2.16287e-06	0.449784	0.135	0.049	MGE	GLRX5	MGE	Monkey	0.0266147	11
1.13138e-07	0.425492	0.692	0.494	MGE	ARL4C	MGE	Monkey	0.0146539	11
8.27803e-07	0.385288	0.128	0.041	MGE	HSPA13	MGE	Monkey	0.0135576	11
8.49821e-07	0.533902	0.282	0.15	MGE	FAM171B	MGE	Monkey	0.0186855	10
3.36254e-06	0.51838	0.445	0.306	MGE	HSP90B1	MGE	Monkey	0.0151614	10
1.40595e-06	0.490052	0.137	0.049	MGE	GLCCI1	MGE	Monkey	0.0129388	10
3.58556e-07	0.466055	0.37	0.218	MGE	CACYBP	MGE	Monkey	0.0108407	10
2.85931e-06	0.438419	0.269	0.143	MGE	MAP2K2	MGE	Monkey	0.0136621	10
1.37722e-06	0.42051	0.429	0.263	MGE	TOMM20	MGE	Monkey	0.0125227	10
1.48888e-06	0.531345	0.295	0.162	MGE	SNX6	MGE	Monkey	0.00763539	9
6.2319e-07	0.506253	0.41	0.239	MGE	SSB	MGE	Monkey	0.00720388	9
2.65421e-06	0.490584	0.237	0.12	MGE	ELF2	MGE	Monkey	0.0221672	9
5.62637e-07	0.462532	0.278	0.145	MGE	FOXN3	MGE	Monkey	0.0190127	9
2.89691e-06	0.435902	0.165	0.068	MGE	CPSF3	MGE	Monkey	0.0198767	9
3.49498e-07	0.412246	0.739	0.568	MGE	FOXG1	MGE	Monkey	0.0115934	9
2.28765e-06	0.406894	0.103	0.03	MGE	RNF168	MGE	Monkey	0.0190378	9
8.38511e-07	0.685636	0.224	0.103	MGE	BCL11A	MGE	Monkey	0.0129513	8
3.33256e-06	0.536182	0.197	0.094	MGE	ACTB	MGE	Monkey	0.0175301	8
7.88429e-07	0.521156	0.195	0.085	MGE	CDK2AP1	MGE	Monkey	0.021143	8
1.63555e-06	0.502581	0.476	0.323	MGE	SYNE2	MGE	Monkey	0.00946165	8
2.45474e-06	0.494215	0.148	0.056	MGE	MBIP	MGE	Monkey	0.018962	8
1.98645e-07	0.483927	0.425	0.267	MGE	CCT8	MGE	Monkey	0.0161919	8
2.82808e-07	0.439681	0.256	0.122	MGE	SSBP1	MGE	Monkey	0.017621	8
1.51414e-06	0.439433	0.169	0.068	MGE	DAZAP1	MGE	Monkey	0.0187236	8
1.16949e-06	0.413851	0.479	0.312	MGE	SMC3	MGE	Monkey	0.0200195	8
2.74415e-06	0.393196	0.519	0.359	MGE	EID1	MGE	Monkey	0.0269636	8
3.08112e-08	0.367558	0.695	0.506	MGE	NUCKS1	MGE	Monkey	0.022851	8
1.0797e-06	0.611801	0.105	0.03	MGE	SMC2	MGE	Monkey	0.0109838	7
1.96091e-06	0.553576	0.355	0.216	MGE	TOP1	MGE	Monkey	0.0132874	7
3.46454e-07	0.538116	0.205	0.09	MGE	BRD1	MGE	Monkey	0.017264	7
7.85343e-07	0.521399	0.378	0.229	MGE	HNRNPAB	MGE	Monkey	0.0154878	7
2.03509e-06	0.513872	0.135	0.049	MGE	HAT1	MGE	Monkey	0.0210058	7
1.60664e-06	0.482073	0.242	0.12	MGE	CAMSAP1	MGE	Monkey	0.0261117	7
5.265e-07	0.477068	0.479	0.291	MGE	EPC1	MGE	Monkey	0.0108441	7
9.86641e-07	0.472087	0.1	0.026	MGE	GKAP1	MGE	Monkey	0.0125013	7
1.82093e-07	0.463015	0.147	0.049	MGE	ECHDC1	MGE	Monkey	0.0197968	7
1.22117e-08	0.462164	0.551	0.367	MGE	PSIP1	MGE	Monkey	0.0137901	7
2.14247e-06	0.459448	0.336	0.188	MGE	CCT6A	MGE	Monkey	0.0205082	7
2.45372e-07	0.45293	0.158	0.056	MGE	PSMC2	MGE	Monkey	0.0148347	7
2.04019e-07	0.443837	0.188	0.075	MGE	TCF3	MGE	Monkey	0.00758627	7
2.57198e-06	0.434832	0.325	0.184	MGE	VEZF1	MGE	Monkey	0.0200278	7
1.97935e-07	0.421686	0.6	0.415	MGE	INA	MGE	Monkey	0.0170325	7
5.51233e-07	0.420136	0.158	0.058	MGE	PRIM1	MGE	Monkey	0.0162492	7
1.24359e-08	0.417805	0.19	0.068	MGE	RAP1B	MGE	Monkey	0.01283	7
2.14464e-06	0.416406	0.457	0.303	MGE	KIF5B	MGE	Monkey	0.0115683	7
4.42428e-08	0.397767	0.575	0.363	MGE	EIF5	MGE	Monkey	0.0190743	7
2.61496e-06	0.381281	0.122	0.041	MGE	MPC1	MGE	Monkey	0.0143762	7
5.81137e-07	0.377442	0.158	0.058	MGE	SERPINB6	MGE	Monkey	0.0167312	7
1.65917e-10	0.606504	0.242	0.092	MGE	NUCB2	MGE	Monkey	0.00563362	6
2.80494e-07	0.547023	0.212	0.094	MGE	ZNF92	MGE	Monkey	0.0163593	6
1.32405e-08	0.546341	0.19	0.07	MGE	BAZ1A	MGE	Monkey	0.0107601	6
1.08672e-07	0.522078	0.353	0.197	MGE	KLHL23	MGE	Monkey	0.00734046	6
6.46428e-08	0.514594	0.259	0.122	MGE	FNBP4	MGE	Monkey	0.0121706	6
3.20368e-06	0.493453	0.286	0.16	MGE	PRPF40A	MGE	Monkey	0.0233757	6
6.62256e-07	0.490162	0.222	0.103	MGE	UBE2R2	MGE	Monkey	0.0150383	6
3.38643e-07	0.481687	0.35	0.188	MGE	HNRNPF	MGE	Monkey	0.0102585	6
7.61689e-07	0.471005	0.118	0.036	MGE	TMX4	MGE	Monkey	0.0152555	6
5.61431e-08	0.457777	0.186	0.071	MGE	LRPPRC	MGE	Monkey	0.0182077	6
1.30527e-06	0.439462	0.105	0.03	MGE	STK39	MGE	Monkey	0.0310552	6
1.22365e-06	0.43088	0.496	0.325	MGE	RND3	MGE	Monkey	0.0216831	6
1.05835e-06	0.423105	0.25	0.122	MGE	TXNL1	MGE	Monkey	0.0197715	6
2.72822e-06	0.423003	0.429	0.269	MGE	ATXN7L3B	MGE	Monkey	0.0177247	6
1.64166e-07	0.421317	0.47	0.282	MGE	ILF3	MGE	Monkey	0.00838426	6
6.89237e-07	0.410587	0.515	0.329	MGE	NDUFC2	MGE	Monkey	0.0151967	6
1.48107e-06	0.384642	0.618	0.445	MGE	SET	MGE	Monkey	0.0241295	6
2.11251e-08	0.547233	0.457	0.291	MGE	RAN	MGE	Monkey	0.0327986	5
2.83257e-06	0.530072	0.316	0.186	MGE	ANP32B	MGE	Monkey	0.0144635	5
2.34115e-06	0.495593	0.214	0.103	MGE	MAP1LC3B	MGE	Monkey	0.0175871	5
3.23045e-06	0.490575	0.207	0.098	MGE	KLF13	MGE	Monkey	0.0186377	5
7.63179e-07	0.489881	0.286	0.148	MGE	FYN	MGE	Monkey	0.0243827	5
9.67944e-07	0.488888	0.122	0.039	MGE	MYO1B	MGE	Monkey	0.0250714	5
4.43848e-10	0.486922	0.224	0.079	MGE	R3HDM2	MGE	Monkey	0.00540779	5
1.52232e-07	0.484725	0.158	0.056	MGE	RNF115	MGE	Monkey	0.0138612	5
8.80506e-07	0.47673	0.214	0.098	MGE	RBM33	MGE	Monkey	0.0256308	5
7.31291e-08	0.46772	0.22	0.096	MGE	CORO1C	MGE	Monkey	0.030083	5
7.3469e-07	0.467318	0.286	0.152	MGE	ZNF22	MGE	Monkey	0.0211348	5
2.00075e-06	0.449502	0.177	0.075	MGE	RAF1	MGE	Monkey	0.0170454	5
2.49182e-07	0.448778	0.147	0.051	MGE	ASXL1	MGE	Monkey	0.0263003	5
6.06163e-07	0.443525	0.154	0.056	MGE	POLR2D	MGE	Monkey	0.0147473	5
1.73602e-06	0.421209	0.336	0.194	MGE	CSNK2A1	MGE	Monkey	0.0206921	5
3.39334e-06	0.415063	0.186	0.085	MGE	SMIM7	MGE	Monkey	0.0296116	5
3.1002e-08	0.411414	0.524	0.333	MGE	KMT2E	MGE	Monkey	0.0328339	5
1.75041e-08	0.405919	0.523	0.318	MGE	SF3B1	MGE	Monkey	0.018688	5
1.54491e-09	0.395534	0.722	0.571	MGE	HINT1	MGE	Monkey	0.0104338	5
7.14056e-07	0.395399	0.122	0.038	MGE	AKIRIN1	MGE	Monkey	0.029028	5
1.66075e-08	0.368631	0.654	0.432	MGE	EIF3K	MGE	Monkey	0.017116	5
3.91731e-07	0.326596	0.863	0.735	MGE	CALM1	MGE	Monkey	0.0224879	5
3.78207e-10	0.758122	0.103	0.013	MGE	CNR1	MGE	Monkey	0.000142534	4
6.46632e-07	0.614747	0.102	0.026	MGE	CKS2	MGE	Monkey	0.0136995	4
2.97323e-06	0.573741	0.22	0.109	MGE	LMNB1	MGE	Monkey	0.012648	4
1.8922e-07	0.546985	0.122	0.034	MGE	UBE2M	MGE	Monkey	0.00462937	4
1.50936e-07	0.541377	0.393	0.231	MGE	HSPA5	MGE	Monkey	0.0178333	4
1.44382e-06	0.538596	0.254	0.132	MGE	TAF15	MGE	Monkey	0.0110707	4
1.43337e-06	0.527044	0.122	0.041	MGE	ZNF195	MGE	Monkey	0.0182932	4
2.86687e-06	0.524916	0.267	0.143	MGE	ROCK1	MGE	Monkey	0.0230974	4
1.43114e-06	0.518258	0.188	0.083	MGE	BOD1	MGE	Monkey	0.0225237	4
1.01274e-06	0.514722	0.12	0.038	MGE	LMNB2	MGE	Monkey	0.00626547	4
9.6287e-08	0.512788	0.143	0.045	MGE	SAMD1	MGE	Monkey	0.0132886	4
1.80193e-06	0.508823	0.242	0.122	MGE	MSI2	MGE	Monkey	0.0113158	4
4.11588e-07	0.502718	0.103	0.026	MGE	FAT1	MGE	Monkey	0.00978393	4
5.39253e-08	0.500838	0.229	0.098	MGE	KANSL1	MGE	Monkey	0.0069518	4
1.21391e-06	0.492132	0.175	0.073	MGE	SCAF8	MGE	Monkey	0.0196327	4
2.65083e-06	0.478582	0.158	0.066	MGE	MDM4	MGE	Monkey	0.0234849	4
6.76183e-08	0.477262	0.16	0.055	MGE	PHACTR4	MGE	Monkey	0.0174236	4
4.85382e-07	0.464356	0.374	0.214	MGE	PTOV1	MGE	Monkey	0.0177386	4
3.28337e-07	0.453056	0.113	0.03	MGE	LRRFIP2	MGE	Monkey	0.0090826	4
2.65901e-07	0.45251	0.444	0.274	MGE	SLC25A3	MGE	Monkey	0.011514	4
1.38312e-06	0.45242	0.239	0.117	MGE	CD81	MGE	Monkey	0.0166535	4
8.75428e-08	0.451435	0.532	0.353	MGE	EIF1B	MGE	Monkey	0.0173817	4
3.73304e-07	0.448847	0.269	0.135	MGE	ENY2	MGE	Monkey	0.0172853	4
2.01729e-06	0.445998	0.412	0.254	MGE	UBE2E3	MGE	Monkey	0.00928091	4
2.27652e-06	0.444855	0.374	0.226	MGE	ARF1	MGE	Monkey	0.0237272	4
2.44988e-06	0.439873	0.126	0.043	MGE	KCMF1	MGE	Monkey	0.0158475	4
3.25973e-06	0.424142	0.265	0.141	MGE	LZIC	MGE	Monkey	0.0297124	4
1.64274e-06	0.421235	0.224	0.107	MGE	SUDS3	MGE	Monkey	0.0316717	4
1.10791e-07	0.420638	0.479	0.301	MGE	RSF1	MGE	Monkey	0.0156907	4
1.88441e-06	0.410094	0.117	0.038	MGE	RCC2	MGE	Monkey	0.0383981	4
1.65069e-06	0.409604	0.135	0.049	MGE	SPCS3	MGE	Monkey	0.024427	4
3.06771e-06	0.407178	0.103	0.03	MGE	CD99	MGE	Monkey	0.0227178	4
2.91433e-06	0.384698	0.541	0.368	MGE	RAC1	MGE	Monkey	0.024266	4
2.65352e-06	0.38033	0.617	0.408	MGE	PTGES3	MGE	Monkey	0.0216366	4
8.34754e-07	0.368571	0.333	0.18	MGE	YY1	MGE	Monkey	0.0189927	4
2.11592e-06	0.363963	0.585	0.406	MGE	YWHAB	MGE	Monkey	0.0316113	4
1.15931e-06	0.605205	0.173	0.073	MGE	ANXA5	MGE	Monkey	0.00967256	3
1.68215e-06	0.586377	0.214	0.105	MGE	HSPH1	MGE	Monkey	0.0199885	3
3.79396e-07	0.566755	0.229	0.107	MGE	RALBP1	MGE	Monkey	0.0132066	3
6.30332e-07	0.557102	0.102	0.026	MGE	ZNF652	MGE	Monkey	0.00865039	3
6.47108e-07	0.535564	0.188	0.081	MGE	BEND5	MGE	Monkey	0.0100469	3
1.21404e-06	0.534556	0.143	0.053	MGE	TMED7	MGE	Monkey	0.00971657	3
1.08741e-06	0.533459	0.305	0.165	MGE	LIMA1	MGE	Monkey	0.0229696	3
1.0206e-06	0.531541	0.227	0.113	MGE	PRKAR2B	MGE	Monkey	0.0110088	3
1.98516e-06	0.520165	0.171	0.073	MGE	SYT14	MGE	Monkey	0.021384	3
1.31287e-06	0.509866	0.201	0.09	MGE	TNKS	MGE	Monkey	0.0130955	3
7.37766e-07	0.507601	0.227	0.111	MGE	SMARCC2	MGE	Monkey	0.0147887	3
2.66599e-06	0.492243	0.335	0.19	MGE	CAPRIN1	MGE	Monkey	0.023075	3
1.99441e-06	0.488587	0.156	0.062	MGE	CDK13	MGE	Monkey	0.0209068	3
1.85278e-06	0.483234	0.182	0.081	MGE	CTNNBL1	MGE	Monkey	0.0142581	3
4.85016e-07	0.480983	0.291	0.15	MGE	BAZ1B	MGE	Monkey	0.00983882	3
2.68605e-06	0.480309	0.34	0.201	MGE	NONO	MGE	Monkey	0.0162768	3
1.92716e-08	0.478625	0.105	0.021	MGE	PDIK1L	MGE	Monkey	0.0268086	3
3.48534e-08	0.468053	0.47	0.288	MGE	MACF1	MGE	Monkey	0.00632129	3
2.52892e-06	0.462141	0.218	0.103	MGE	RAB8B	MGE	Monkey	0.0227441	3
2.85348e-06	0.462004	0.171	0.073	MGE	ATP1B3	MGE	Monkey	0.0355996	3
1.92347e-07	0.460206	0.404	0.233	MGE	FXR1	MGE	Monkey	0.00300708	3
2.75531e-07	0.458973	0.258	0.128	MGE	STIP1	MGE	Monkey	0.0159761	3
3.21521e-08	0.455913	0.271	0.126	MGE	NDUFB6	MGE	Monkey	0.00373506	3
9.78284e-10	0.453351	0.175	0.053	MGE	MIS18A	MGE	Monkey	0.0126401	3
6.09073e-07	0.446133	0.173	0.07	MGE	DNAJA2	MGE	Monkey	0.00856588	3
1.28913e-06	0.441231	0.162	0.064	MGE	TXNRD1	MGE	Monkey	0.0277726	3
8.72892e-07	0.43513	0.233	0.111	MGE	SMCHD1	MGE	Monkey	0.0203049	3
1.76193e-07	0.420983	0.102	0.023	MGE	ALYREF	MGE	Monkey	0.00801896	3
6.55153e-07	0.420132	0.224	0.103	MGE	TPRKB	MGE	Monkey	0.00812208	3
5.28895e-07	0.419588	0.611	0.419	MGE	SFPQ	MGE	Monkey	0.00616667	3
2.84804e-06	0.417559	0.113	0.036	MGE	TP53INP1	MGE	Monkey	0.0227833	3
2.86727e-06	0.413822	0.154	0.062	MGE	RRP1B	MGE	Monkey	0.0356676	3
1.05395e-06	0.410759	0.103	0.028	MGE	MT1E	MGE	Monkey	0.028944	3
1.22171e-06	0.409214	0.22	0.105	MGE	KIAA0232	MGE	Monkey	0.0354633	3
2.70659e-06	0.40839	0.305	0.164	MGE	EIF3M	MGE	Monkey	0.0306899	3
1.6431e-06	0.40799	0.118	0.038	MGE	MDM2	MGE	Monkey	0.0285184	3
1.43628e-06	0.404088	0.485	0.323	MGE	MEX3A	MGE	Monkey	0.0154318	3
3.22679e-06	0.376638	0.229	0.115	MGE	MRPL57	MGE	Monkey	0.034768	3
2.11369e-07	1.08561	0.491	0.353	MGE	EEF1A1	MGE	Monkey	0.0168289	2
1.06922e-07	0.899648	0.256	0.132	MGE	DUT	MGE	Monkey	0.0184633	2
1.25567e-06	0.828066	0.148	0.056	MGE	DNAJB1	MGE	Monkey	0.0107465	2
2.36955e-07	0.800735	0.102	0.024	MGE	SCGN	MGE	Monkey	0.0233436	2
9.86067e-07	0.687152	0.105	0.03	MGE	PTTG1	MGE	Monkey	0.0105646	2
1.92855e-09	0.628623	0.158	0.045	MGE	FARP1	MGE	Monkey	0.00207173	2
6.22745e-07	0.569329	0.122	0.038	MGE	SSBP4	MGE	Monkey	0.00466305	2
1.51124e-08	0.559818	0.203	0.081	MGE	ZMIZ1	MGE	Monkey	0.0176762	2
1.60266e-06	0.552939	0.242	0.124	MGE	RSBN1L	MGE	Monkey	0.0135584	2
1.72203e-06	0.550469	0.177	0.077	MGE	ARL8A	MGE	Monkey	0.0136256	2
6.03611e-07	0.549343	0.325	0.18	MGE	NCOR1	MGE	Monkey	0.00430067	2
2.83661e-06	0.545928	0.389	0.25	MGE	CITED2	MGE	Monkey	0.027445	2
1.36718e-09	0.537314	0.297	0.132	MGE	GSPT1	MGE	Monkey	0.00330169	2
2.48025e-07	0.532867	0.182	0.073	MGE	SMNDC1	MGE	Monkey	0.00678397	2
1.16525e-07	0.530572	0.145	0.047	MGE	MSH6	MGE	Monkey	0.00510191	2
9.31622e-07	0.526359	0.239	0.118	MGE	THUMPD1	MGE	Monkey	0.0115049	2
9.86127e-09	0.52485	0.103	0.019	MGE	MSL2	MGE	Monkey	0.0162104	2
8.96373e-08	0.52081	0.158	0.055	MGE	IFT88	MGE	Monkey	0.00839239	2
3.64063e-07	0.520253	0.171	0.068	MGE	CMC2	MGE	Monkey	0.0113836	2
2.70544e-06	0.519795	0.192	0.088	MGE	DLX6	MGE	Monkey	0.0424356	2
3.61985e-07	0.519651	0.242	0.117	MGE	GTF3C6	MGE	Monkey	0.00638328	2
1.27025e-06	0.516829	0.147	0.055	MGE	IGFBP2	MGE	Monkey	0.0170945	2
1.9296e-07	0.514031	0.227	0.102	MGE	SRP72	MGE	Monkey	0.0157041	2
1.9097e-06	0.507924	0.222	0.105	MGE	SETD2	MGE	Monkey	0.0289736	2
3.08189e-06	0.506476	0.211	0.102	MGE	IMP3	MGE	Monkey	0.0221696	2
2.23246e-06	0.502154	0.141	0.053	MGE	RAB21	MGE	Monkey	0.0221505	2
1.02488e-06	0.499173	0.126	0.041	MGE	MCPH1	MGE	Monkey	0.0148187	2
8.42796e-07	0.497842	0.197	0.086	MGE	ZNF326	MGE	Monkey	0.0138325	2
6.06129e-07	0.496796	0.35	0.195	MGE	BOD1L1	MGE	Monkey	0.00646871	2
2.77262e-07	0.493102	0.301	0.158	MGE	EIF4B	MGE	Monkey	0.00202119	2
2.27665e-06	0.487065	0.175	0.075	MGE	CAPZA1	MGE	Monkey	0.0190845	2
3.46185e-06	0.486814	0.226	0.115	MGE	KDM5A	MGE	Monkey	0.0306031	2
2.92272e-06	0.486308	0.188	0.085	MGE	MOB3B	MGE	Monkey	0.0338901	2
2.57499e-07	0.48626	0.143	0.047	MGE	ARL4A	MGE	Monkey	0.00418453	2
1.98061e-07	0.484696	0.252	0.117	MGE	SMU1	MGE	Monkey	0.00164348	2
5.51798e-07	0.478966	0.1	0.024	MGE	SFRP1	MGE	Monkey	0.00422325	2
2.77166e-07	0.476666	0.102	0.024	MGE	TACC1	MGE	Monkey	0.010006	2
7.67252e-07	0.476327	0.111	0.032	MGE	NUP62	MGE	Monkey	0.00593368	2
1.53888e-06	0.474591	0.28	0.148	MGE	PGK1	MGE	Monkey	0.0185095	2
1.66853e-06	0.474029	0.188	0.083	MGE	ACBD3	MGE	Monkey	0.020842	2
7.10337e-07	0.473541	0.18	0.073	MGE	BUB3	MGE	Monkey	0.00789062	2
2.28242e-06	0.472319	0.128	0.045	MGE	CRCP	MGE	Monkey	0.0214865	2
1.62916e-07	0.469918	0.179	0.07	MGE	PLXNA2	MGE	Monkey	0.0107326	2
2.76027e-06	0.469245	0.432	0.28	MGE	PBRM1	MGE	Monkey	0.0376697	2
9.40487e-07	0.465157	0.184	0.079	MGE	TNRC18	MGE	Monkey	0.0208111	2
1.98605e-07	0.462976	0.239	0.111	MGE	CCNL1	MGE	Monkey	0.0112311	2
2.83951e-07	0.461578	0.434	0.267	MGE	SMARCA5	MGE	Monkey	0.00766912	2
2.0354e-06	0.457659	0.216	0.102	MGE	CUL3	MGE	Monkey	0.0211737	2
2.27294e-07	0.457572	0.1	0.023	MGE	PHYH	MGE	Monkey	0.00187365	2
1.09495e-06	0.455233	0.323	0.182	MGE	FAM107B	MGE	Monkey	0.024449	2
3.15976e-06	0.454934	0.194	0.09	MGE	SUMO1	MGE	Monkey	0.0383729	2
1.68741e-06	0.454924	0.218	0.102	MGE	RBBP6	MGE	Monkey	0.0126597	2
5.03153e-07	0.454093	0.256	0.124	MGE	PSMD11	MGE	Monkey	0.0196857	2
4.39444e-07	0.45356	0.139	0.047	MGE	ALDH7A1	MGE	Monkey	0.0159819	2
2.0445e-07	0.453428	0.25	0.118	MGE	MTCH1	MGE	Monkey	0.0114934	2
3.23823e-06	0.452564	0.224	0.109	MGE	HBS1L	MGE	Monkey	0.0299574	2
7.9474e-08	0.451699	0.53	0.336	MGE	DNAJA1	MGE	Monkey	0.0014099	2
8.5844e-09	0.447888	0.376	0.203	MGE	DDX24	MGE	Monkey	0.00425225	2
3.3996e-06	0.446901	0.397	0.252	MGE	RBM25	MGE	Monkey	0.028161	2
1.4167e-06	0.441707	0.164	0.064	MGE	CREBZF	MGE	Monkey	0.0108692	2
1.61979e-06	0.439814	0.513	0.35	MGE	TRA2B	MGE	Monkey	0.0210034	2
3.13881e-07	0.439733	0.31	0.162	MGE	SNRNP200	MGE	Monkey	0.0076963	2
6.96043e-07	0.438289	0.348	0.195	MGE	NEDD4L	MGE	Monkey	0.00812134	2
4.20365e-07	0.437434	0.327	0.177	MGE	PTP4A2	MGE	Monkey	0.0239684	2
1.78709e-06	0.43592	0.148	0.056	MGE	SUCO	MGE	Monkey	0.0370787	2
9.85993e-07	0.434065	0.237	0.117	MGE	PRDM2	MGE	Monkey	0.0196354	2
2.98217e-06	0.433798	0.115	0.038	MGE	ATAD5	MGE	Monkey	0.0436286	2
6.37415e-07	0.433649	0.141	0.049	MGE	RAP1A	MGE	Monkey	0.0222784	2
1.08118e-08	0.431024	0.103	0.019	MGE	LRRC42	MGE	Monkey	0.00482045	2
2.40977e-07	0.427794	0.476	0.293	MGE	TAF7	MGE	Monkey	0.0085792	2
2.05027e-06	0.422639	0.293	0.158	MGE	PLEKHO1	MGE	Monkey	0.0187479	2
1.11504e-06	0.421006	0.258	0.128	MGE	RHOA	MGE	Monkey	0.022463	2
6.13226e-07	0.414614	0.118	0.036	MGE	MPPED2	MGE	Monkey	0.013687	2
1.14306e-07	0.412173	0.133	0.039	MGE	INTS10	MGE	Monkey	0.0206227	2
2.71543e-06	0.411952	0.224	0.109	MGE	ROCK2	MGE	Monkey	0.0316312	2
2.40777e-06	0.409969	0.152	0.058	MGE	GABPB1	MGE	Monkey	0.0189384	2
1.55788e-06	0.404101	0.105	0.03	MGE	DTYMK	MGE	Monkey	0.0179976	2
1.83643e-06	0.400576	0.171	0.071	MGE	SF3A3	MGE	Monkey	0.037663	2
1.17978e-06	0.39756	0.278	0.141	MGE	RALA	MGE	Monkey	0.0095541	2
3.35579e-06	0.394499	0.147	0.056	MGE	UQCRC2	MGE	Monkey	0.025404	2
3.66963e-07	0.390584	0.338	0.184	MGE	SUPT16H	MGE	Monkey	0.0257318	2
1.52433e-06	0.389823	0.271	0.139	MGE	SF1	MGE	Monkey	0.0156821	2
2.02921e-07	0.389817	0.256	0.122	MGE	APPL1	MGE	Monkey	0.0246876	2
6.50571e-07	0.385891	0.12	0.036	MGE	PDZD8	MGE	Monkey	0.0155023	2
1.06331e-06	0.377917	0.12	0.038	MGE	KIF22	MGE	Monkey	0.0162241	2
1.50309e-06	0.373378	0.549	0.359	MGE	HNRNPR	MGE	Monkey	0.0136532	2
1.29204e-06	0.36935	0.289	0.148	MGE	HSPD1	MGE	Monkey	0.0100691	2
3.43695e-06	0.351909	0.278	0.145	MGE	UBE3A	MGE	Monkey	0.0287841	2
2.94531e-06	0.344425	0.402	0.235	MGE	CDC5L	MGE	Monkey	0.0420501	2
2.92675e-07	0.341138	0.227	0.102	MGE	PAIP1	MGE	Monkey	0.00409416	2
1.65835e-07	0.317943	0.419	0.233	MGE	ARPC3	MGE	Monkey	0.0175976	2
1.16428e-07	0.311931	0.914	0.805	MGE	UBC	MGE	Monkey	0.00807501	2
6.40945e-07	0.948137	0.233	0.12	MGE	RBP1	MGE	Monkey	0.00910014	1
8.09322e-09	0.898233	0.103	0.019	MGE	MKI67	MGE	Monkey	0.000114908	1
2.45893e-08	0.733974	0.207	0.085	MGE	EZH2	MGE	Monkey	0.000349119	1
9.0784e-09	0.699632	0.34	0.186	MGE	SNRPB	MGE	Monkey	0.000128895	1
3.05169e-09	0.663681	0.147	0.039	MGE	SIPA1L2	MGE	Monkey	4.33279e-05	1
8.74684e-07	0.659773	0.139	0.051	MGE	KAZN	MGE	Monkey	0.0124188	1
1.36198e-06	0.658132	0.158	0.064	MGE	SOX6	MGE	Monkey	0.0193373	1
1.61461e-08	0.639199	0.165	0.055	MGE	CDK14	MGE	Monkey	0.000229242	1
7.76473e-07	0.636251	0.145	0.055	MGE	PHACTR1	MGE	Monkey	0.0110244	1
2.0532e-06	0.631895	0.132	0.049	MGE	PRKCA	MGE	Monkey	0.0291514	1
1.44354e-07	0.626714	0.182	0.073	MGE	CDV3	MGE	Monkey	0.00204954	1
9.02907e-09	0.626417	0.207	0.079	MGE	ABL1	MGE	Monkey	0.000128195	1
2.93727e-07	0.615192	0.278	0.145	MGE	LAMP3	MGE	Monkey	0.00417033	1
5.51839e-09	0.603432	0.102	0.017	MGE	MCM4	MGE	Monkey	7.83501e-05	1
7.95034e-07	0.60009	0.145	0.055	MGE	SEC31A	MGE	Monkey	0.0112879	1
1.62118e-07	0.598891	0.167	0.064	MGE	TSSC4	MGE	Monkey	0.00230176	1
6.68791e-09	0.592023	0.177	0.058	MGE	MRPL9	MGE	Monkey	9.4955e-05	1
2.75291e-08	0.58958	0.118	0.028	MGE	ZFPM1	MGE	Monkey	0.000390859	1
4.97458e-08	0.588206	0.169	0.06	MGE	WDR48	MGE	Monkey	0.000706291	1
1.03918e-09	0.586826	0.239	0.092	MGE	FOXJ3	MGE	Monkey	1.47543e-05	1
1.77771e-09	0.583954	0.408	0.227	MGE	MTDH	MGE	Monkey	2.524e-05	1
1.72905e-07	0.578217	0.211	0.092	MGE	TGOLN2	MGE	Monkey	0.00245491	1
9.63389e-07	0.577836	0.128	0.043	MGE	CDC16	MGE	Monkey	0.0136782	1
7.62467e-08	0.572699	0.111	0.026	MGE	CCNT1	MGE	Monkey	0.00108255	1
2.28504e-06	0.572017	0.212	0.103	MGE	EPC2	MGE	Monkey	0.0324429	1
7.85046e-08	0.571467	0.177	0.066	MGE	TRMT10C	MGE	Monkey	0.00111461	1
9.65836e-08	0.570548	0.4	0.237	MGE	CDH2	MGE	Monkey	0.00137129	1
2.35966e-07	0.564991	0.165	0.062	MGE	CXXC5	MGE	Monkey	0.00335024	1
9.17506e-07	0.563924	0.205	0.094	MGE	AKR7A2	MGE	Monkey	0.0130268	1
6.24738e-07	0.560035	0.139	0.049	MGE	PTPN12	MGE	Monkey	0.00887004	1
2.37876e-07	0.56003	0.445	0.286	MGE	CCDC112	MGE	Monkey	0.00337736	1
6.82144e-07	0.559839	0.274	0.143	MGE	MRPL47	MGE	Monkey	0.00968508	1
3.74072e-08	0.556676	0.154	0.049	MGE	CCDC59	MGE	Monkey	0.000531108	1
1.16853e-06	0.555436	0.154	0.06	MGE	COA6	MGE	Monkey	0.0165908	1
2.51141e-06	0.552915	0.143	0.055	MGE	OLFM2	MGE	Monkey	0.035657	1
2.97789e-07	0.548831	0.102	0.024	MGE	PPAT	MGE	Monkey	0.00422801	1
2.84826e-06	0.545075	0.22	0.109	MGE	NSD1	MGE	Monkey	0.0404396	1
4.42997e-08	0.544062	0.105	0.023	MGE	XRCC1	MGE	Monkey	0.000628967	1
8.07275e-08	0.542952	0.205	0.085	MGE	RYBP	MGE	Monkey	0.00114617	1
7.12995e-07	0.539292	0.139	0.049	MGE	MPDZ	MGE	Monkey	0.0101231	1
1.68892e-06	0.535895	0.147	0.056	MGE	ZNF354C	MGE	Monkey	0.0239794	1
2.21314e-07	0.533804	0.175	0.068	MGE	ADAR	MGE	Monkey	0.00314222	1
1.06689e-06	0.532486	0.1	0.026	MGE	ZNF91	MGE	Monkey	0.0151476	1
1.62368e-07	0.530848	0.107	0.026	MGE	TMEM158	MGE	Monkey	0.00230529	1
1.57077e-06	0.526969	0.145	0.055	MGE	FBXL5	MGE	Monkey	0.0223018	1
4.29108e-07	0.526889	0.1	0.024	MGE	PCGF3	MGE	Monkey	0.00609248	1
3.19956e-08	0.523885	0.464	0.28	MGE	POU2F1	MGE	Monkey	0.000454273	1
5.57471e-07	0.52114	0.327	0.18	MGE	PPM1G	MGE	Monkey	0.00791498	1
1.79852e-08	0.519396	0.169	0.056	MGE	KDELR1	MGE	Monkey	0.000255353	1
1.96937e-07	0.517865	0.107	0.026	MGE	ARHGEF11	MGE	Monkey	0.00279611	1
1.95484e-06	0.516265	0.154	0.062	MGE	KIAA1549	MGE	Monkey	0.0277549	1
2.13828e-06	0.515421	0.122	0.041	MGE	ATXN3	MGE	Monkey	0.0303594	1
1.37096e-06	0.515253	0.186	0.083	MGE	MARK3	MGE	Monkey	0.0194649	1
3.62282e-07	0.514969	0.173	0.068	MGE	GFPT1	MGE	Monkey	0.00514368	1
7.21186e-07	0.514589	0.128	0.041	MGE	R3HCC1	MGE	Monkey	0.0102394	1
3.45728e-06	0.514504	0.148	0.06	MGE	HSDL1	MGE	Monkey	0.0490865	1
1.67848e-06	0.513513	0.256	0.132	MGE	ADD1	MGE	Monkey	0.0238311	1
9.14157e-07	0.512308	0.156	0.06	MGE	ZBTB44	MGE	Monkey	0.0129792	1
8.92268e-07	0.509771	0.103	0.028	MGE	LYRM2	MGE	Monkey	0.0126684	1
9.60554e-07	0.50895	0.162	0.064	MGE	CDC26	MGE	Monkey	0.013638	1
2.47797e-07	0.508874	0.182	0.073	MGE	AASDHPPT	MGE	Monkey	0.00351823	1
1.45432e-06	0.508722	0.102	0.028	MGE	PRPF31	MGE	Monkey	0.0206484	1
2.45881e-06	0.508047	0.128	0.045	MGE	VKORC1	MGE	Monkey	0.0349102	1
1.8371e-06	0.507375	0.165	0.068	MGE	RP9	MGE	Monkey	0.0260831	1
3.06229e-07	0.507252	0.261	0.13	MGE	WAC	MGE	Monkey	0.00434784	1
1.23242e-07	0.506017	0.179	0.068	MGE	ZNF43	MGE	Monkey	0.00174979	1
1.26292e-06	0.50455	0.184	0.081	MGE	YEATS2	MGE	Monkey	0.017931	1
1.38102e-06	0.504373	0.111	0.034	MGE	PTBP1	MGE	Monkey	0.0196077	1
2.3873e-07	0.503382	0.203	0.085	MGE	C1QTNF4	MGE	Monkey	0.00338949	1
2.75677e-06	0.503334	0.207	0.1	MGE	TTC19	MGE	Monkey	0.0391406	1
1.66017e-06	0.503244	0.12	0.039	MGE	MIER1	MGE	Monkey	0.0235711	1
5.00088e-07	0.503028	0.113	0.032	MGE	NVL	MGE	Monkey	0.00710024	1
8.94391e-07	0.502607	0.327	0.184	MGE	SRSF10	MGE	Monkey	0.0126986	1
2.83099e-06	0.502432	0.246	0.13	MGE	TIAL1	MGE	Monkey	0.0401945	1
1.11022e-06	0.502103	0.218	0.103	MGE	USP33	MGE	Monkey	0.0157629	1
1.58701e-06	0.500963	0.229	0.113	MGE	MAPK8	MGE	Monkey	0.0225324	1
7.4496e-07	0.497143	0.395	0.241	MGE	RAD21	MGE	Monkey	0.0105769	1
3.6051e-07	0.496803	0.314	0.169	MGE	INSM1	MGE	Monkey	0.00511853	1
3.48042e-06	0.496276	0.22	0.107	MGE	SRSF9	MGE	Monkey	0.049415	1
8.90968e-07	0.49415	0.16	0.062	MGE	SNRPA1	MGE	Monkey	0.01265	1
3.11351e-06	0.493927	0.179	0.079	MGE	DDX42	MGE	Monkey	0.0442056	1
8.98612e-07	0.493641	0.314	0.171	MGE	NIPBL	MGE	Monkey	0.0127585	1
2.43084e-07	0.492389	0.143	0.047	MGE	CEP295	MGE	Monkey	0.0034513	1
4.51189e-07	0.492367	0.18	0.073	MGE	SLU7	MGE	Monkey	0.00640598	1
2.16611e-06	0.492269	0.143	0.055	MGE	UFM1	MGE	Monkey	0.0307544	1
7.11186e-07	0.491655	0.165	0.066	MGE	ASB8	MGE	Monkey	0.0100974	1
5.69145e-07	0.491246	0.132	0.043	MGE	PGRMC2	MGE	Monkey	0.00808072	1
2.52885e-07	0.490048	0.387	0.227	MGE	PPIG	MGE	Monkey	0.00359046	1
8.0581e-08	0.488497	0.103	0.023	MGE	TJP1	MGE	Monkey	0.00114409	1
1.33142e-06	0.487466	0.128	0.043	MGE	TUBGCP2	MGE	Monkey	0.0189035	1
2.75524e-07	0.48726	0.132	0.041	MGE	KNOP1	MGE	Monkey	0.00391189	1
1.11562e-06	0.485543	0.171	0.07	MGE	FIP1L1	MGE	Monkey	0.0158396	1
3.44909e-07	0.484054	0.137	0.045	MGE	PPP1R2	MGE	Monkey	0.00489702	1
1.42101e-06	0.483723	0.335	0.195	MGE	JTB	MGE	Monkey	0.0201755	1
1.28399e-06	0.483307	0.212	0.1	MGE	RBM22	MGE	Monkey	0.0182301	1
1.53776e-06	0.482867	0.148	0.056	MGE	PLGRKT	MGE	Monkey	0.0218332	1
2.47429e-06	0.482186	0.113	0.036	MGE	CSGALNACT2	MGE	Monkey	0.0351299	1
1.00187e-06	0.481491	0.177	0.073	MGE	AGFG1	MGE	Monkey	0.0142245	1
1.02739e-06	0.480721	0.107	0.03	MGE	TRIM37	MGE	Monkey	0.0145869	1
2.09695e-06	0.479355	0.145	0.055	MGE	FRA10AC1	MGE	Monkey	0.0297725	1
2.80765e-06	0.477582	0.235	0.12	MGE	ADNP	MGE	Monkey	0.0398629	1
1.15085e-06	0.476991	0.374	0.224	MGE	KLF7	MGE	Monkey	0.0163398	1
2.1853e-06	0.476933	0.122	0.041	MGE	DCTPP1	MGE	Monkey	0.0310269	1
2.2312e-06	0.476714	0.103	0.03	MGE	MSN	MGE	Monkey	0.0316785	1
1.78291e-07	0.473133	0.111	0.028	MGE	DERL2	MGE	Monkey	0.00253138	1
3.12481e-06	0.470995	0.289	0.158	MGE	PPP1R12A	MGE	Monkey	0.044366	1
3.09185e-06	0.470608	0.299	0.169	MGE	PA2G4	MGE	Monkey	0.0438981	1
2.50332e-06	0.468402	0.291	0.162	MGE	MYH10	MGE	Monkey	0.0355421	1
1.67998e-06	0.46694	0.105	0.03	MGE	SCRN1	MGE	Monkey	0.0238523	1
4.54584e-07	0.464189	0.4	0.235	MGE	SRSF2	MGE	Monkey	0.00645419	1
3.45458e-06	0.462239	0.179	0.079	MGE	MRPL43	MGE	Monkey	0.0490481	1
5.0884e-07	0.46199	0.353	0.203	MGE	ATXN10	MGE	Monkey	0.0072245	1
3.20562e-06	0.461402	0.173	0.075	MGE	ZNRF1	MGE	Monkey	0.0455134	1
2.79972e-06	0.460681	0.109	0.034	MGE	GLTP	MGE	Monkey	0.0397505	1
7.3164e-07	0.459147	0.173	0.07	MGE	SRPK1	MGE	Monkey	0.0103878	1
5.42068e-08	0.458723	0.113	0.026	MGE	SAE1	MGE	Monkey	0.000769628	1
1.60624e-06	0.458691	0.13	0.045	MGE	MCMBP	MGE	Monkey	0.0228054	1
2.73344e-06	0.457995	0.177	0.077	MGE	PSMB2	MGE	Monkey	0.0388094	1
2.21137e-06	0.457194	0.117	0.038	MGE	CALU	MGE	Monkey	0.0313971	1
1.17489e-06	0.456802	0.25	0.126	MGE	USP11	MGE	Monkey	0.0166811	1
1.70729e-06	0.454325	0.111	0.034	MGE	PLEKHA3	MGE	Monkey	0.0242401	1
3.09685e-06	0.452914	0.267	0.143	MGE	UBXN4	MGE	Monkey	0.043969	1
4.82948e-07	0.452229	0.179	0.071	MGE	IPO5	MGE	Monkey	0.00685689	1
2.16822e-06	0.451396	0.267	0.139	MGE	CCT4	MGE	Monkey	0.0307845	1
1.14137e-06	0.450069	0.378	0.231	MGE	TCAF1	MGE	Monkey	0.0162052	1
7.6145e-07	0.450032	0.133	0.045	MGE	TMEM203	MGE	Monkey	0.0108111	1
2.22878e-06	0.448788	0.179	0.077	MGE	PITPNB	MGE	Monkey	0.0316442	1
2.34147e-06	0.448462	0.135	0.049	MGE	ZKSCAN1	MGE	Monkey	0.0332442	1
1.40182e-06	0.447613	0.118	0.038	MGE	UTP6	MGE	Monkey	0.019903	1
1.78309e-06	0.446571	0.115	0.036	MGE	EXOC4	MGE	Monkey	0.0253163	1
7.65441e-07	0.445332	0.109	0.03	MGE	KIAA1328	MGE	Monkey	0.0108677	1
2.26829e-06	0.444923	0.169	0.071	MGE	SUZ12	MGE	Monkey	0.0322052	1
2.29401e-06	0.44476	0.284	0.152	MGE	MPHOSPH8	MGE	Monkey	0.0325704	1
1.26862e-06	0.442655	0.248	0.124	MGE	PSMD12	MGE	Monkey	0.0180119	1
2.59423e-06	0.440911	0.113	0.036	MGE	WDR33	MGE	Monkey	0.0368329	1
2.99998e-06	0.440573	0.122	0.041	MGE	TMED4	MGE	Monkey	0.0425937	1
1.12206e-06	0.440216	0.397	0.235	MGE	CCDC50	MGE	Monkey	0.015931	1
1.24217e-06	0.439851	0.1	0.026	MGE	UBE2J2	MGE	Monkey	0.0176364	1
1.12273e-07	0.439711	0.133	0.039	MGE	SLK	MGE	Monkey	0.00159406	1
3.21246e-08	0.438698	0.368	0.194	MGE	UBE2D2	MGE	Monkey	0.000456105	1
3.17097e-08	0.438543	0.325	0.158	MGE	CBX5	MGE	Monkey	0.000450215	1
3.2438e-06	0.437896	0.173	0.075	MGE	CDC40	MGE	Monkey	0.0460555	1
2.75528e-06	0.43789	0.192	0.086	MGE	GGNBP2	MGE	Monkey	0.0391195	1
9.24559e-07	0.437854	0.491	0.312	MGE	SRRM1	MGE	Monkey	0.0131269	1
4.81314e-07	0.43702	0.1	0.024	MGE	DBF4	MGE	Monkey	0.0068337	1
3.49642e-06	0.435978	0.299	0.164	MGE	MLF2	MGE	Monkey	0.0496421	1
1.54824e-06	0.43565	0.109	0.032	MGE	THAP1	MGE	Monkey	0.021982	1
1.17783e-06	0.433445	0.135	0.047	MGE	THUMPD3	MGE	Monkey	0.0167228	1
9.66434e-07	0.432348	0.408	0.248	MGE	ARL3	MGE	Monkey	0.0137214	1
4.5845e-07	0.431227	0.182	0.073	MGE	MIA3	MGE	Monkey	0.00650907	1
2.38089e-06	0.431189	0.246	0.126	MGE	CTCF	MGE	Monkey	0.0338039	1
1.438e-06	0.431092	0.331	0.188	MGE	SYT11	MGE	Monkey	0.0204167	1
2.98487e-06	0.428555	0.353	0.216	MGE	NPM1	MGE	Monkey	0.0423791	1
2.69212e-06	0.42686	0.16	0.066	MGE	PSMB4	MGE	Monkey	0.0382227	1
2.51985e-06	0.425765	0.205	0.094	MGE	FBXW11	MGE	Monkey	0.0357768	1
2.30116e-06	0.424898	0.212	0.1	MGE	DNAJC19	MGE	Monkey	0.0326719	1
5.53927e-07	0.42267	0.596	0.414	MGE	SCG3	MGE	Monkey	0.00786466	1
1.12451e-06	0.422207	0.445	0.276	MGE	THRAP3	MGE	Monkey	0.0159658	1
2.41342e-06	0.421955	0.15	0.058	MGE	UHRF2	MGE	Monkey	0.0342657	1
2.04913e-06	0.421814	0.107	0.032	MGE	RNF4	MGE	Monkey	0.0290935	1
2.31229e-06	0.420957	0.289	0.156	MGE	MSRA	MGE	Monkey	0.0328298	1
2.44551e-06	0.420016	0.18	0.079	MGE	ZNF451	MGE	Monkey	0.0347214	1
1.41948e-06	0.419255	0.1	0.026	MGE	UBN1	MGE	Monkey	0.0201537	1
1.08434e-06	0.418752	0.235	0.113	MGE	LSM2	MGE	Monkey	0.0153955	1
1.79694e-06	0.418015	0.368	0.216	MGE	SCAND1	MGE	Monkey	0.025513	1
1.9504e-06	0.417925	0.346	0.199	MGE	PNMA1	MGE	Monkey	0.0276917	1
1.55216e-06	0.417294	0.147	0.055	MGE	MRPL13	MGE	Monkey	0.0220375	1
2.56635e-06	0.416203	0.137	0.051	MGE	ZNF131	MGE	Monkey	0.036437	1
1.04393e-06	0.416072	0.12	0.038	MGE	WDR82	MGE	Monkey	0.0148217	1
5.48013e-07	0.415309	0.194	0.081	MGE	PSMD1	MGE	Monkey	0.00778069	1
1.195e-06	0.415131	0.126	0.041	MGE	ACTL6A	MGE	Monkey	0.0169666	1
3.16309e-06	0.413654	0.244	0.126	MGE	LRPAP1	MGE	Monkey	0.0449096	1
1.9642e-06	0.412492	0.795	0.714	MGE	CCDC88A	MGE	Monkey	0.0278877	1
3.34396e-06	0.41023	0.124	0.043	MGE	MRPS23	MGE	Monkey	0.0474776	1
2.29789e-06	0.407877	0.229	0.113	MGE	ERGIC2	MGE	Monkey	0.0326254	1
1.3917e-06	0.405781	0.383	0.227	MGE	TCP1	MGE	Monkey	0.0197594	1
2.12722e-06	0.405709	0.194	0.086	MGE	ETNK1	MGE	Monkey	0.0302023	1
7.74421e-07	0.405649	0.22	0.102	MGE	RAD23B	MGE	Monkey	0.0109952	1
5.29053e-07	0.403354	0.154	0.056	MGE	EZR	MGE	Monkey	0.0075115	1
2.17477e-06	0.40221	0.242	0.12	MGE	SIAH1	MGE	Monkey	0.0308774	1
2.93672e-06	0.401317	0.199	0.092	MGE	TOPORS	MGE	Monkey	0.0416956	1
2.37852e-06	0.401022	0.32	0.177	MGE	PDCD5	MGE	Monkey	0.0337702	1
2.14457e-06	0.400812	0.417	0.259	MGE	ARID4B	MGE	Monkey	0.0304485	1
9.35901e-07	0.400548	0.169	0.068	MGE	LPGAT1	MGE	Monkey	0.0132879	1
2.69605e-06	0.399048	0.1	0.028	MGE	SAMM50	MGE	Monkey	0.0382785	1
2.61532e-06	0.39874	0.132	0.047	MGE	MSH2	MGE	Monkey	0.0371323	1
6.39125e-07	0.396913	0.323	0.175	MGE	COX5A	MGE	Monkey	0.0090743	1
9.60843e-07	0.395892	0.165	0.064	MGE	MRPS7	MGE	Monkey	0.013642	1
2.5516e-06	0.395835	0.293	0.158	MGE	METAP2	MGE	Monkey	0.0362277	1
1.1996e-06	0.395243	0.111	0.032	MGE	NOM1	MGE	Monkey	0.0170319	1
3.27818e-06	0.395115	0.128	0.045	MGE	OXA1L	MGE	Monkey	0.0465436	1
2.63086e-06	0.3941	0.132	0.047	MGE	BTG3	MGE	Monkey	0.0373529	1
3.42809e-06	0.392309	0.133	0.049	MGE	TET2	MGE	Monkey	0.0486721	1
1.21658e-06	0.391735	0.258	0.128	MGE	HMGXB4	MGE	Monkey	0.0172729	1
1.7973e-06	0.390498	0.209	0.096	MGE	EIF4A3	MGE	Monkey	0.0255181	1
1.42846e-06	0.38878	0.137	0.049	MGE	OPA1	MGE	Monkey	0.0202812	1
1.49691e-06	0.388331	0.244	0.12	MGE	PDS5B	MGE	Monkey	0.0212531	1
1.89985e-06	0.386414	0.105	0.03	MGE	NKAIN4	MGE	Monkey	0.026974	1
8.13785e-07	0.383299	0.102	0.026	MGE	MIS18BP1	MGE	Monkey	0.0115541	1
2.74103e-06	0.383187	0.462	0.297	MGE	CADM1	MGE	Monkey	0.0389172	1
2.35065e-06	0.382633	0.111	0.034	MGE	AKT2	MGE	Monkey	0.0333745	1
1.11653e-06	0.381482	0.515	0.336	MGE	PRRC2C	MGE	Monkey	0.0158526	1
2.59192e-06	0.378186	0.464	0.295	MGE	PSMB1	MGE	Monkey	0.0368001	1
8.65161e-07	0.375865	0.331	0.18	MGE	ACIN1	MGE	Monkey	0.0122836	1
2.01519e-06	0.375656	0.318	0.175	MGE	ARF4	MGE	Monkey	0.0286117	1
1.44475e-06	0.374325	0.365	0.212	MGE	SMARCD1	MGE	Monkey	0.0205125	1
2.22385e-06	0.369503	0.139	0.051	MGE	FAM120AOS	MGE	Monkey	0.0315743	1
1.98035e-07	0.36855	0.195	0.079	MGE	PPP4R2	MGE	Monkey	0.0028117	1
2.7727e-06	0.366224	0.186	0.083	MGE	ANKLE2	MGE	Monkey	0.0393668	1
2.80081e-06	0.365352	0.367	0.216	MGE	RBM8A	MGE	Monkey	0.0397659	1
1.39617e-06	0.364688	0.355	0.199	MGE	NOVA1	MGE	Monkey	0.0198229	1
3.21471e-06	0.361601	0.699	0.545	MGE	NCL	MGE	Monkey	0.0456425	1
6.12206e-07	0.358723	0.103	0.026	MGE	SSR3	MGE	Monkey	0.0086921	1
2.16555e-06	0.358648	0.263	0.133	MGE	MRPL11	MGE	Monkey	0.0307465	1
3.52122e-06	0.356394	0.113	0.036	MGE	FAF2	MGE	Monkey	0.0499943	1
3.03478e-06	0.355348	0.143	0.055	MGE	LSM12	MGE	Monkey	0.0430879	1
2.40635e-06	0.352602	0.547	0.37	MGE	PNRC1	MGE	Monkey	0.0341654	1
2.31697e-06	0.352184	0.148	0.056	MGE	KCNQ2	MGE	Monkey	0.0328964	1
9.79153e-07	0.350437	0.801	0.641	MGE	PTMS	MGE	Monkey	0.013902	1
6.57088e-07	0.348535	0.12	0.036	MGE	COA1	MGE	Monkey	0.00932933	1
2.9169e-06	0.348134	0.551	0.376	MGE	PAK2	MGE	Monkey	0.0414141	1
1.29618e-06	0.346261	0.139	0.049	MGE	KAT7	MGE	Monkey	0.0184032	1
2.39983e-06	0.341905	0.805	0.647	MGE	CFL1	MGE	Monkey	0.0340728	1
2.67816e-06	0.337957	0.199	0.09	MGE	MRPS34	MGE	Monkey	0.0380246	1
2.42419e-06	0.334889	0.16	0.064	MGE	RAB22A	MGE	Monkey	0.0344187	1
3.38979e-06	0.327858	0.16	0.064	MGE	CTNNBIP1	MGE	Monkey	0.0481283	1
3.10645e-06	0.302698	0.265	0.135	MGE	SUGT1	MGE	Monkey	0.0441054	1
3.03162e-06	0.260389	0.93	0.836	MGE	NACA	MGE	Monkey	0.043043	1
2.60078e-13	0.543127	0.805	0.739	CGE	MARCKSL1	MGE	Monkey	0.00051922	100
2.64865e-15	0.608059	0.776	0.695	CGE	YBX1	MGE	Monkey	0.00206861	93
6.99854e-11	0.793348	0.227	0.085	CGE	GNS	MGE	Monkey	0.00513782	81
1.57041e-10	0.277368	0.994	0.985	CGE	TMSB10	MGE	Monkey	0.00256242	66
5.71163e-08	0.80284	0.201	0.086	CGE	APOE	MGE	Monkey	0.00782492	55
3.24256e-08	0.475122	0.709	0.648	CGE	BEX1	MGE	Monkey	0.0108952	52
2.86986e-08	0.618296	0.673	0.543	CGE	CCK	MGE	Monkey	0.00765327	49
5.93457e-07	0.74743	0.404	0.288	CGE	MEF2C	MGE	Monkey	0.0112724	35
3.3582e-06	0.652719	0.509	0.459	CGE	MORF4L1	MGE	Monkey	0.0115543	28
1.18252e-06	0.450969	0.818	0.778	CGE	AP1S2	MGE	Monkey	0.0103753	26
1.11318e-06	0.955307	0.15	0.06	CGE	LIMCH1	MGE	Monkey	0.00811376	22
1.56897e-07	0.469081	0.697	0.648	CGE	CALM2	MGE	Monkey	0.0106009	13
1.99493e-06	0.725816	0.132	0.049	CGE	MAGED4B	MGE	Monkey	0.0133595	12
1.04404e-07	0.541562	0.617	0.543	CGE	TOMM7	MGE	Monkey	0.0180222	12
3.27447e-08	0.74653	0.152	0.051	CGE	S100B	MGE	Monkey	0.014869	11
2.5079e-06	0.406972	0.816	0.773	CGE	MAP2	MGE	Monkey	0.00919111	11
2.01606e-08	1.9378	0.103	0.021	CGE	CRH	MGE	Monkey	5.65126e-05	10
5.96066e-07	0.414691	0.75	0.637	CGE	EEF1G	MGE	Monkey	0.0136352	6
2.71994e-06	0.577917	0.44	0.321	CGE	PCSK1N	MGE	Monkey	0.0223539	4
3.05912e-07	0.551796	0.579	0.489	CGE	HNRNPA1	MGE	Monkey	0.0121807	3
1.71978e-06	0.477764	0.65	0.547	CGE	SYT1	MGE	Monkey	0.0114617	3
2.21549e-08	0.229497	0.992	0.998	CGE	STMN1	MGE	Monkey	0.00128667	3
2.75667e-07	0.835594	0.295	0.173	CGE	SHOC2	MGE	Monkey	0.00315792	2
1.49572e-06	0.628077	0.427	0.329	CGE	NDFIP1	MGE	Monkey	0.0305016	2
2.40053e-07	0.785518	0.291	0.173	CGE	AP2B1	MGE	Monkey	0.00340827	1
1.60403e-07	0.765355	0.105	0.026	CGE	CLU	MGE	Monkey	0.0022774	1
2.09712e-06	0.750888	0.38	0.274	CGE	STMN4	MGE	Monkey	0.0297749	1
1.38215e-08	0.700755	0.412	0.276	CGE	NDUFA13	MGE	Monkey	0.000196238	1
2.93228e-06	0.637052	0.459	0.365	CGE	SLIRP	MGE	Monkey	0.0416325	1
4.31474e-07	0.560348	0.519	0.417	CGE	COX7A2	MGE	Monkey	0.00612606	1
1.08783e-06	0.540275	0.532	0.41	CGE	TUBA1B	MGE	Monkey	0.0154451	1
1.25796e-06	0.467456	0.669	0.618	CGE	DYNC1I2	MGE	Monkey	0.0178606	1
3.12448e-06	0.348329	0.81	0.754	CGE	UBB	MGE	Monkey	0.0443614	1
1.06911e-60	2.85394	0.154	0.011	CTX	CCK	CTX	Human	4.5169e-46	100
3.11596e-122	1.76385	0.497	0.176	CTX	MEF2C	CTX	Human	5.63299e-102	100
1.32464e-111	1.70344	0.332	0.049	CTX	NTM	CTX	Human	5.74282e-101	100
9.90808e-97	1.48733	0.275	0.039	CTX	CNR1	CTX	Human	3.03415e-75	100
2.21597e-52	1.31002	0.241	0.064	CTX	NPAS3	CTX	Human	3.89865e-42	100
1.43855e-86	1.28919	0.548	0.269	CTX	CALB2	CTX	Human	2.62361e-76	100
9.38222e-39	1.18464	0.556	0.346	CTX	ERBB4	CTX	Human	1.21374e-35	100
4.06938e-68	1.14492	0.382	0.159	CTX	NETO2	CTX	Human	8.96749e-50	100
5.55301e-63	1.08094	0.294	0.094	CTX	ANK3	CTX	Human	2.67092e-47	100
1.88713e-66	1.07934	0.456	0.208	CTX	BEX2	CTX	Human	3.00543e-56	100
5.11103e-67	1.07929	0.602	0.375	CTX	AP1S2	CTX	Human	3.63146e-49	100
3.83229e-61	1.04427	0.175	0.023	CTX	GRIA2	CTX	Human	1.28787e-45	100
2.47486e-53	1.0093	0.439	0.206	CTX	NPAS1	CTX	Human	4.64518e-50	100
3.62114e-59	0.999347	0.233	0.051	CTX	FGF12	CTX	Human	1.35004e-43	100
1.26202e-74	0.981626	0.562	0.301	CTX	PCSK1N	CTX	Human	7.79038e-57	100
9.40235e-53	0.969433	0.236	0.06	CTX	VSTM2A	CTX	Human	1.59294e-42	100
1.18491e-93	0.966579	0.827	0.654	CTX	BASP1	CTX	Human	2.38462e-81	100
3.0359e-51	0.943654	0.345	0.132	CTX	CPE	CTX	Human	1.61097e-40	100
1.25137e-62	0.93783	0.716	0.514	CTX	NRXN1	CTX	Human	1.07128e-59	100
9.96393e-58	0.927426	0.147	0.012	CTX	GRIN2B	CTX	Human	2.44439e-47	100
1.48932e-48	0.885802	0.147	0.027	CTX	PNOC	CTX	Human	3.58797e-32	100
1.2271e-60	0.847423	0.639	0.438	CTX	EEF1B2	CTX	Human	1.64208e-46	100
4.4601e-31	0.817458	0.185	0.066	CTX	THSD7A	CTX	Human	1.66378e-22	100
8.57837e-31	0.816641	0.341	0.198	CTX	PEG10	CTX	Human	2.04901e-15	100
6.44225e-18	0.808063	0.102	0.029	CTX	ADARB2	CTX	Human	6.17464e-14	100
5.29123e-36	0.785208	0.352	0.194	CTX	RGS12	CTX	Human	4.99256e-17	100
1.05996e-34	0.761282	0.177	0.047	CTX	AKAP7	CTX	Human	6.26921e-28	100
4.87226e-32	0.758321	0.313	0.145	CTX	BEX5	CTX	Human	7.21031e-23	100
2.38742e-45	0.75533	0.341	0.158	CTX	LY6H	CTX	Human	2.9194e-24	100
1.74866e-41	0.753496	0.137	0.017	CTX	PPP2R2B	CTX	Human	9.74591e-35	100
1.90376e-66	0.752719	0.652	0.43	CTX	SARAF	CTX	Human	4.13899e-42	100
4.09468e-31	0.733249	0.284	0.137	CTX	NDN	CTX	Human	1.63631e-21	100
1.65596e-39	0.730098	0.478	0.277	CTX	VCAN	CTX	Human	1.94913e-25	100
7.36097e-39	0.724558	0.5	0.322	CTX	CELF4	CTX	Human	8.00427e-26	100
6.22117e-36	0.722718	0.189	0.066	CTX	CADM2	CTX	Human	7.11983e-19	100
2.27877e-44	0.713051	0.133	0.017	CTX	CHD5	CTX	Human	1.51197e-28	100
8.15592e-19	0.71126	0.142	0.055	CTX	DLG2	CTX	Human	3.39241e-13	100
1.0135e-90	0.697336	0.928	0.781	CTX	YBX1	CTX	Human	4.10439e-71	100
1.45194e-27	0.691994	0.351	0.21	CTX	CXADR	CTX	Human	4.21568e-20	100
6.06982e-28	0.680129	0.308	0.152	CTX	FJX1	CTX	Human	1.43385e-19	100
3.65324e-27	0.673925	0.285	0.146	CTX	TTC9B	CTX	Human	2.41135e-17	100
5.04747e-42	0.672155	0.771	0.673	CTX	CALM1	CTX	Human	1.29242e-35	100
3.00859e-38	0.671364	0.13	0.024	CTX	EEF1A2	CTX	Human	1.68896e-26	100
1.17033e-80	0.660074	0.96	0.743	CTX	FTH1	CTX	Human	1.64188e-64	100
1.73797e-18	0.659292	0.184	0.086	CTX	CSRP2	CTX	Human	1.25993e-10	100
4.05109e-26	0.656981	0.374	0.216	CTX	THRA	CTX	Human	4.48005e-21	100
5.0501e-27	0.654804	0.525	0.4	CTX	SCGN	CTX	Human	7.90441e-11	100
7.08267e-32	0.651326	0.305	0.162	CTX	DNER	CTX	Human	1.03897e-14	100
6.09839e-30	0.649725	0.132	0.035	CTX	PCLO	CTX	Human	1.95581e-20	100
1.01943e-32	0.643666	0.421	0.26	CTX	ATP6V0B	CTX	Human	7.19584e-18	100
2.1902e-64	0.639868	0.809	0.596	CTX	ZNF428	CTX	Human	1.38351e-45	100
4.29827e-26	0.637127	0.259	0.126	CTX	SEZ6L2	CTX	Human	3.03715e-17	100
5.2275e-34	0.630214	0.356	0.204	CTX	TCEAL2	CTX	Human	6.97344e-19	100
3.06487e-27	0.628265	0.253	0.13	CTX	NAP1L3	CTX	Human	9.72709e-14	100
3.11524e-24	0.62294	0.327	0.192	CTX	NLRP1	CTX	Human	9.36821e-13	100
2.76369e-27	0.622812	0.216	0.087	CTX	RNF165	CTX	Human	1.39885e-13	100
3.13131e-22	0.619666	0.204	0.099	CTX	MAP1LC3A	CTX	Human	6.39978e-15	100
2.45745e-26	0.618712	0.476	0.316	CTX	CHL1	CTX	Human	3.3591e-18	100
2.55579e-36	0.616833	0.365	0.206	CTX	COX5A	CTX	Human	6.40471e-16	100
2.3235e-25	0.61647	0.226	0.101	CTX	PKIA	CTX	Human	1.40668e-14	100
1.45888e-24	0.615209	0.377	0.23	CTX	SCG5	CTX	Human	1.47374e-11	100
3.77078e-22	0.613422	0.177	0.069	CTX	VIM	CTX	Human	1.13709e-11	100
2.76746e-76	0.599738	0.931	0.734	CTX	MARCKSL1	CTX	Human	1.5043e-55	100
6.08165e-21	0.597625	0.16	0.058	CTX	CLTB	CTX	Human	6.27581e-18	100
1.62882e-22	0.597381	0.416	0.275	CTX	GUK1	CTX	Human	6.65689e-16	100
1.66783e-23	0.59597	0.121	0.037	CTX	DPP6	CTX	Human	7.85705e-15	100
3.3281e-39	0.594682	0.686	0.518	CTX	TERF2IP	CTX	Human	2.49729e-28	100
1.79174e-35	0.59048	0.553	0.383	CTX	RAB2A	CTX	Human	3.91515e-21	100
2.31983e-19	0.584691	0.543	0.407	CTX	FABP7	CTX	Human	6.28275e-14	100
1.59723e-24	0.583319	0.193	0.084	CTX	REEP1	CTX	Human	3.34294e-12	100
5.67786e-16	0.580939	0.189	0.098	CTX	TSPAN7	CTX	Human	8.19354e-11	100
2.52653e-23	0.577154	0.452	0.308	CTX	MZT2B	CTX	Human	3.89657e-16	100
1.74047e-31	0.576126	0.64	0.497	CTX	CAMK2N1	CTX	Human	2.11346e-19	100
1.16888e-23	0.57444	0.382	0.243	CTX	PODXL2	CTX	Human	1.16359e-15	100
6.08441e-32	0.570704	0.13	0.032	CTX	ATP6V1G2	CTX	Human	9.29473e-16	100
2.95332e-38	0.570052	0.561	0.402	CTX	BEX4	CTX	Human	1.60589e-16	100
3.68269e-19	0.569506	0.337	0.211	CTX	TSPAN13	CTX	Human	5.842e-15	100
3.71993e-25	0.567559	0.648	0.527	CTX	SYT1	CTX	Human	6.88652e-17	100
2.60644e-23	0.565411	0.562	0.412	CTX	ARGLU1	CTX	Human	2.68835e-19	100
1.05207e-25	0.564174	0.115	0.027	CTX	SORCS3	CTX	Human	3.36015e-16	100
4.16361e-21	0.563381	0.531	0.42	CTX	MAPT	CTX	Human	4.93713e-16	100
7.08254e-38	0.561585	0.758	0.643	CTX	BEX1	CTX	Human	2.17173e-29	100
4.35696e-21	0.560723	0.324	0.189	CTX	AAK1	CTX	Human	5.30744e-11	100
2.12623e-23	0.559461	0.243	0.123	CTX	PITHD1	CTX	Human	2.73925e-13	100
2.82421e-16	0.554981	0.401	0.301	CTX	PROX1	CTX	Human	2.19378e-06	100
3.18982e-21	0.552233	0.244	0.127	CTX	TMOD2	CTX	Human	1.16109e-12	100
1.07793e-18	0.549313	0.174	0.07	CTX	SMAP1	CTX	Human	1.85459e-12	100
5.30534e-35	0.548855	0.501	0.329	CTX	UBE2E3	CTX	Human	1.0398e-15	100
2.30624e-27	0.54665	0.155	0.059	CTX	SMARCD3	CTX	Human	9.02196e-14	100
4.3109e-21	0.544277	0.29	0.174	CTX	C1QTNF4	CTX	Human	3.40242e-12	100
6.53711e-32	0.544155	0.151	0.047	CTX	JPH4	CTX	Human	1.09645e-12	100
5.51454e-16	0.541082	0.321	0.22	CTX	ENC1	CTX	Human	8.27849e-05	100
2.71095e-16	0.539188	0.283	0.168	CTX	PTPRA	CTX	Human	1.03893e-10	100
3.24839e-31	0.533843	0.478	0.315	CTX	CLTA	CTX	Human	8.55086e-16	100
5.36343e-16	0.532179	0.425	0.294	CTX	ID4	CTX	Human	2.68785e-11	100
2.46852e-21	0.531833	0.242	0.133	CTX	CSRNP3	CTX	Human	1.42252e-07	100
3.49179e-24	0.530968	0.532	0.408	CTX	LUC7L3	CTX	Human	9.63482e-13	100
1.26418e-21	0.530702	0.182	0.085	CTX	RAC3	CTX	Human	1.1771e-10	100
3.80421e-22	0.53062	0.325	0.188	CTX	KRT10	CTX	Human	3.01299e-10	100
2.44503e-23	0.525624	0.179	0.077	CTX	MYDGF	CTX	Human	1.68747e-11	100
2.36489e-18	0.523987	0.371	0.26	CTX	EVL	CTX	Human	1.50488e-10	100
8.60606e-21	0.522229	0.235	0.121	CTX	WLS	CTX	Human	6.27574e-12	100
2.61111e-26	0.515957	0.12	0.034	CTX	SPINT2	CTX	Human	2.90257e-13	100
4.0232e-26	0.515054	0.23	0.109	CTX	EPN2	CTX	Human	1.76775e-11	100
2.86247e-21	0.514342	0.607	0.499	CTX	YWHAB	CTX	Human	1.08597e-15	100
1.01583e-17	0.512273	0.509	0.415	CTX	RERE	CTX	Human	1.28347e-07	100
3.89683e-22	0.51108	0.204	0.099	CTX	HRAS	CTX	Human	1.12955e-08	100
3.89932e-21	0.510884	0.238	0.133	CTX	ENHO	CTX	Human	1.66142e-09	100
1.51687e-20	0.509964	0.124	0.041	CTX	CNIH2	CTX	Human	1.67993e-13	100
7.94495e-21	0.509906	0.239	0.134	CTX	SRM	CTX	Human	7.51252e-07	100
1.72009e-14	0.509071	0.39	0.258	CTX	SMARCD1	CTX	Human	4.24601e-07	100
9.30678e-26	0.505294	0.187	0.082	CTX	DPF1	CTX	Human	1.1384e-11	100
2.24427e-20	0.498611	0.222	0.11	CTX	MRPS26	CTX	Human	1.51517e-09	100
2.58829e-15	0.49842	0.15	0.071	CTX	FGF13	CTX	Human	6.36714e-05	100
4.14708e-19	0.498395	0.328	0.204	CTX	GADD45GIP1	CTX	Human	1.73707e-09	100
9.33145e-41	0.498266	0.787	0.726	CTX	GPM6A	CTX	Human	2.96852e-22	100
1.77447e-12	0.497031	0.214	0.131	CTX	OLFM1	CTX	Human	1.77906e-05	100
4.71848e-17	0.496059	0.161	0.074	CTX	CTXN1	CTX	Human	1.15556e-09	100
7.56827e-17	0.493944	0.291	0.176	CTX	KLHL23	CTX	Human	1.45168e-08	100
2.01726e-19	0.493873	0.22	0.119	CTX	PID1	CTX	Human	1.11676e-07	100
5.10868e-17	0.492917	0.44	0.321	CTX	ATP1B1	CTX	Human	3.18283e-09	100
1.12909e-20	0.491908	0.284	0.173	CTX	HNRNPAB	CTX	Human	2.75138e-07	100
2.14908e-17	0.490839	0.334	0.225	CTX	NME1	CTX	Human	3.52961e-08	100
1.31137e-16	0.490371	0.206	0.11	CTX	SERP2	CTX	Human	6.74231e-08	100
1.37861e-18	0.490153	0.523	0.4	CTX	PSIP1	CTX	Human	2.02192e-12	100
3.79582e-19	0.484023	0.236	0.13	CTX	TCEAL5	CTX	Human	3.42463e-08	100
5.20024e-12	0.481678	0.146	0.077	CTX	DACT1	CTX	Human	7.08249e-08	100
1.69463e-21	0.481547	0.313	0.192	CTX	MAGEF1	CTX	Human	3.95148e-08	100
5.26906e-17	0.480731	0.121	0.054	CTX	FAM3C	CTX	Human	2.09398e-06	100
9.50345e-12	0.4779	0.319	0.237	CTX	AP2B1	CTX	Human	3.84416e-05	100
2.67316e-16	0.475535	0.113	0.048	CTX	GRIA1	CTX	Human	4.78794e-06	100
3.84785e-19	0.475346	0.175	0.089	CTX	RNF145	CTX	Human	1.46588e-07	100
1.73204e-18	0.473219	0.43	0.296	CTX	YWHAH	CTX	Human	1.75304e-08	100
5.31839e-12	0.470123	0.344	0.236	CTX	NDUFC1	CTX	Human	6.2351e-09	100
9.31476e-21	0.470074	0.68	0.59	CTX	VAMP2	CTX	Human	1.64374e-11	100
4.42557e-26	0.467226	0.66	0.547	CTX	DSTN	CTX	Human	3.45112e-14	100
3.25818e-23	0.467167	0.673	0.575	CTX	SET	CTX	Human	4.96425e-15	100
8.1651e-15	0.462347	0.217	0.116	CTX	CFAP97	CTX	Human	1.87955e-07	100
2.43982e-10	0.462227	0.197	0.118	CTX	NRXN2	CTX	Human	7.99929e-07	100
2.56628e-22	0.458273	0.251	0.138	CTX	REV3L	CTX	Human	5.19165e-07	100
1.08439e-17	0.457422	0.139	0.059	CTX	DEAF1	CTX	Human	1.75296e-06	100
1.17731e-09	0.455356	0.134	0.067	CTX	PIK3R1	CTX	Human	1.37206e-05	100
9.99668e-20	0.453039	0.256	0.151	CTX	TPM1	CTX	Human	1.66024e-07	100
2.02125e-25	0.450935	0.303	0.181	CTX	FAM110B	CTX	Human	3.00217e-06	100
1.62116e-18	0.450011	0.47	0.341	CTX	SNRPN	CTX	Human	1.47828e-08	100
1.23731e-14	0.449314	0.13	0.056	CTX	TMEM59L	CTX	Human	5.12258e-07	100
1.78698e-15	0.448801	0.13	0.06	CTX	LPIN2	CTX	Human	2.68894e-08	100
9.51057e-16	0.442934	0.227	0.132	CTX	CD81	CTX	Human	9.39512e-06	100
9.71712e-12	0.442211	0.285	0.189	CTX	C1QBP	CTX	Human	1.57049e-06	100
1.11165e-17	0.442172	0.354	0.244	CTX	SRSF9	CTX	Human	1.38811e-07	100
9.4847e-20	0.441472	0.142	0.062	CTX	CNRIP1	CTX	Human	1.04163e-07	100
5.88807e-19	0.440681	0.36	0.239	CTX	PGRMC1	CTX	Human	4.30768e-08	100
5.5472e-16	0.439991	0.445	0.325	CTX	NDFIP1	CTX	Human	4.20604e-08	100
4.44235e-16	0.439773	0.216	0.129	CTX	STUB1	CTX	Human	1.12502e-06	100
1.31471e-12	0.436527	0.193	0.108	CTX	R3HDM2	CTX	Human	6.07202e-06	100
1.13611e-10	0.434027	0.197	0.115	CTX	UBE2M	CTX	Human	7.21949e-05	100
1.62099e-09	0.433508	0.262	0.163	CTX	KTN1	CTX	Human	0.000216291	100
1.67968e-10	0.433336	0.256	0.17	CTX	MRPS34	CTX	Human	5.03927e-06	100
3.83766e-13	0.43099	0.233	0.14	CTX	APLP2	CTX	Human	4.95409e-05	100
6.90555e-19	0.428508	0.495	0.362	CTX	ITM2B	CTX	Human	3.95468e-09	100
8.53242e-17	0.427317	0.115	0.046	CTX	TCEAL6	CTX	Human	5.29123e-08	100
2.11642e-15	0.42715	0.301	0.195	CTX	PPM1G	CTX	Human	7.75922e-06	100
1.93784e-09	0.42681	0.128	0.065	CTX	CCDC85B	CTX	Human	1.80497e-06	100
4.01229e-10	0.425851	0.234	0.147	CTX	TRIM44	CTX	Human	6.73915e-07	100
2.89605e-16	0.425332	0.116	0.045	CTX	FKBP1B	CTX	Human	1.39841e-08	100
1.8886e-18	0.42464	0.57	0.474	CTX	RBFOX2	CTX	Human	1.5524e-07	100
2.76971e-12	0.422927	0.77	0.724	CTX	UCHL1	CTX	Human	1.03828e-09	100
2.27599e-18	0.422825	0.283	0.176	CTX	BRI3	CTX	Human	3.55672e-06	100
3.99102e-14	0.421804	0.119	0.053	CTX	NKAIN3	CTX	Human	4.93211e-05	100
2.95371e-13	0.41944	0.178	0.094	CTX	RGS17	CTX	Human	1.444e-05	100
9.77409e-25	0.419434	0.738	0.601	CTX	HMGN1	CTX	Human	1.18381e-14	100
7.04483e-14	0.419364	0.202	0.126	CTX	CNTFR	CTX	Human	2.37135e-05	100
2.08879e-14	0.417667	0.216	0.119	CTX	BRD7	CTX	Human	4.29881e-05	100
2.06307e-14	0.415439	0.333	0.229	CTX	UQCRFS1	CTX	Human	4.83501e-05	100
2.62786e-18	0.414264	0.454	0.342	CTX	NDUFB2	CTX	Human	4.57758e-05	100
5.59549e-11	0.414101	0.277	0.18	CTX	JTB	CTX	Human	0.000489012	100
4.4959e-14	0.408716	0.239	0.148	CTX	NOL7	CTX	Human	0.000320326	100
1.73462e-14	0.407514	0.578	0.468	CTX	ARL4C	CTX	Human	2.82499e-07	100
1.50347e-11	0.406876	0.276	0.183	CTX	PSMD14	CTX	Human	4.65426e-05	100
5.51667e-10	0.406311	0.417	0.317	CTX	VAPA	CTX	Human	6.59818e-06	100
3.78186e-13	0.405433	0.38	0.273	CTX	SRPK2	CTX	Human	0.000234104	100
4.31322e-24	0.405118	0.787	0.708	CTX	NDUFA4	CTX	Human	9.52091e-16	100
8.77608e-19	0.402902	0.285	0.176	CTX	IDI1	CTX	Human	0.000206584	100
2.19179e-16	0.402867	0.148	0.078	CTX	PPP3CB	CTX	Human	4.27831e-05	100
2.20947e-17	0.401933	0.504	0.385	CTX	KIF5B	CTX	Human	1.60064e-07	100
9.61463e-14	0.400178	0.304	0.215	CTX	ATOX1	CTX	Human	3.61607e-05	100
2.03067e-12	0.399756	0.282	0.187	CTX	UBE2S	CTX	Human	0.000162676	100
1.76698e-10	0.399735	0.462	0.366	CTX	MYT1L	CTX	Human	3.6211e-06	100
5.6124e-20	0.397491	0.164	0.081	CTX	ARPC5L	CTX	Human	0.000330896	100
1.9375e-13	0.397284	0.286	0.183	CTX	PRELID1	CTX	Human	1.5629e-05	100
1.28422e-13	0.395	0.255	0.166	CTX	ZRANB2	CTX	Human	0.000179566	100
2.14643e-13	0.394339	0.195	0.111	CTX	CDC42EP3	CTX	Human	6.91829e-05	100
5.88948e-14	0.392691	0.389	0.289	CTX	COX20	CTX	Human	0.000140736	100
3.54973e-14	0.392381	0.167	0.096	CTX	TMEM132A	CTX	Human	0.000132243	100
7.57274e-10	0.390996	0.521	0.444	CTX	HP1BP3	CTX	Human	3.11297e-05	100
5.29337e-10	0.390365	0.117	0.053	CTX	PGP	CTX	Human	9.8322e-06	100
5.80475e-10	0.389253	0.174	0.102	CTX	PRKAR2B	CTX	Human	8.37848e-06	100
2.08345e-14	0.389062	0.397	0.289	CTX	NDUFB8	CTX	Human	5.20078e-05	100
9.34001e-11	0.387067	0.222	0.15	CTX	RNF187	CTX	Human	0.000731377	100
3.8185e-10	0.386401	0.236	0.159	CTX	EEA1	CTX	Human	0.000580976	100
3.09948e-20	0.386322	0.628	0.513	CTX	PARK7	CTX	Human	2.2802e-06	100
3.35529e-10	0.384948	0.17	0.104	CTX	ACOT7	CTX	Human	0.00091002	100
1.12217e-21	0.382998	0.39	0.269	CTX	PA2G4	CTX	Human	9.3533e-05	100
6.16697e-19	0.380935	0.575	0.469	CTX	SEC62	CTX	Human	8.11819e-08	100
7.63912e-09	0.37708	0.143	0.075	CTX	FAM50A	CTX	Human	0.000160474	100
5.13144e-12	0.374559	0.236	0.154	CTX	MRPL41	CTX	Human	0.000150663	100
2.70553e-12	0.372912	0.196	0.119	CTX	RABEP1	CTX	Human	0.000293345	100
4.34783e-12	0.372753	0.447	0.33	CTX	KIF5C	CTX	Human	2.94754e-05	100
1.8147e-14	0.368699	0.59	0.513	CTX	FABP5	CTX	Human	0.000370762	100
1.56847e-08	0.367942	0.193	0.119	CTX	BCL7A	CTX	Human	0.000580697	100
3.03843e-13	0.366049	0.128	0.067	CTX	HPCAL1	CTX	Human	0.000781754	100
7.895e-21	0.362194	0.155	0.064	CTX	PPP2R2D	CTX	Human	0.000119161	100
1.14081e-08	0.360139	0.108	0.057	CTX	FBXO9	CTX	Human	0.000766405	100
1.11169e-11	0.357943	0.583	0.471	CTX	EIF5	CTX	Human	5.84683e-06	100
4.81534e-11	0.355632	0.446	0.34	CTX	RANBP1	CTX	Human	1.74327e-05	100
1.88754e-11	0.355243	0.113	0.048	CTX	DNM3	CTX	Human	7.39377e-05	100
5.41145e-25	0.353729	0.704	0.596	CTX	NDUFS5	CTX	Human	1.51218e-10	100
9.21498e-09	0.352825	0.121	0.061	CTX	PPP6R2	CTX	Human	4.29591e-05	100
1.09393e-34	0.349185	0.807	0.708	CTX	COX7A2	CTX	Human	1.28946e-10	100
2.79185e-10	0.348972	0.136	0.076	CTX	SV2A	CTX	Human	0.000656931	100
4.03374e-19	0.347964	0.126	0.06	CTX	GLRA2	CTX	Human	0.00108121	100
8.72751e-15	0.345947	0.723	0.629	CTX	PTMS	CTX	Human	8.6712e-09	100
1.43249e-09	0.344918	0.481	0.405	CTX	PHF14	CTX	Human	0.000350238	100
1.90622e-27	0.336741	0.916	0.828	CTX	CCNI	CTX	Human	1.25735e-17	100
1.57078e-11	0.336722	0.664	0.596	CTX	PLS3	CTX	Human	0.000139252	100
2.1206e-18	0.325345	0.73	0.682	CTX	MORF4L1	CTX	Human	2.80583e-05	100
1.99575e-12	0.314709	0.553	0.429	CTX	SF3B6	CTX	Human	0.000192342	100
1.70582e-10	0.314383	0.495	0.38	CTX	CENPV	CTX	Human	3.15793e-05	100
5.31183e-23	0.311062	0.863	0.82	CTX	GAPDH	CTX	Human	1.2356e-05	100
2.57006e-17	0.309078	0.806	0.76	CTX	PEBP1	CTX	Human	7.47506e-06	100
6.53608e-37	0.79322	0.104	0.007	CTX	LIMCH1	CTX	Human	1.38105e-28	99
8.0242e-31	0.508465	0.111	0.024	CTX	COTL1	CTX	Human	1.23405e-13	99
2.09213e-08	0.478248	0.241	0.172	CTX	PTPRD	CTX	Human	0.000283414	99
7.30082e-08	0.437415	0.278	0.2	CTX	APP	CTX	Human	0.00157701	99
1.55483e-10	0.428829	0.246	0.157	CTX	ARL6IP5	CTX	Human	5.48099e-05	99
7.98391e-10	0.425182	0.284	0.208	CTX	ASCL1	CTX	Human	0.000396129	99
2.66154e-14	0.41491	0.246	0.162	CTX	ATP2B1	CTX	Human	0.000498164	99
1.55416e-11	0.410368	0.265	0.182	CTX	ATP6AP2	CTX	Human	0.000213853	99
4.06645e-13	0.403386	0.13	0.07	CTX	PTN	CTX	Human	0.000747132	99
1.23813e-08	0.402991	0.135	0.085	CTX	TMEM259	CTX	Human	0.000207431	99
5.01118e-13	0.398763	0.155	0.088	CTX	PREPL	CTX	Human	1.44161e-05	99
2.40041e-16	0.395738	0.298	0.2	CTX	SNAP25	CTX	Human	0.000875979	99
2.36038e-16	0.391932	0.146	0.067	CTX	CISD1	CTX	Human	4.91074e-05	99
1.90208e-15	0.383274	0.53	0.422	CTX	DDX24	CTX	Human	4.80905e-05	99
1.37746e-11	0.375492	0.121	0.061	CTX	HAGH	CTX	Human	0.000120732	99
6.67135e-12	0.372882	0.19	0.116	CTX	STRBP	CTX	Human	0.000777894	99
8.46834e-08	0.366675	0.282	0.219	CTX	PDCD6	CTX	Human	0.000674598	99
4.74928e-09	0.366541	0.653	0.593	CTX	ZEB2	CTX	Human	0.000266937	99
5.37588e-12	0.365804	0.178	0.106	CTX	XPA	CTX	Human	0.000105795	99
7.46157e-09	0.365629	0.156	0.088	CTX	AFF3	CTX	Human	0.00049877	99
2.109e-15	0.365217	0.177	0.092	CTX	ZNRF1	CTX	Human	7.07662e-05	99
1.06486e-11	0.361537	0.217	0.133	CTX	URI1	CTX	Human	0.000395423	99
8.23671e-09	0.359046	0.467	0.378	CTX	DEK	CTX	Human	0.000485457	99
8.91119e-09	0.357088	0.134	0.076	CTX	TMEM203	CTX	Human	0.000553923	99
1.42564e-11	0.353082	0.324	0.229	CTX	EFNB2	CTX	Human	0.000150726	99
1.79453e-13	0.35018	0.515	0.423	CTX	DCTN3	CTX	Human	0.000378846	99
3.47422e-10	0.346837	0.119	0.06	CTX	NTN4	CTX	Human	0.00109495	99
9.15415e-10	0.344214	0.109	0.063	CTX	SSBP4	CTX	Human	8.60005e-05	99
6.29418e-11	0.343148	0.453	0.338	CTX	PPP1R14B	CTX	Human	0.000396351	99
1.08491e-12	0.333793	0.137	0.068	CTX	ATP1A3	CTX	Human	0.000325712	99
4.02951e-07	0.330811	0.344	0.26	CTX	SH3BP5	CTX	Human	0.000498699	99
1.2452e-11	0.326543	0.119	0.064	CTX	SPATS2L	CTX	Human	0.000608899	99
1.21765e-11	0.313201	0.575	0.503	CTX	RTF1	CTX	Human	0.000938517	99
3.67184e-18	0.312422	0.648	0.537	CTX	RAC1	CTX	Human	9.96805e-05	99
1.56035e-11	0.430882	0.25	0.16	CTX	CPLX2	CTX	Human	2.02644e-05	98
8.59049e-14	0.406319	0.132	0.069	CTX	PTPRZ1	CTX	Human	0.00125379	98
1.84066e-14	0.399617	0.169	0.095	CTX	TCEA2	CTX	Human	0.000398909	98
2.58488e-09	0.379579	0.196	0.121	CTX	PDCD7	CTX	Human	0.00129137	98
2.20455e-09	0.376446	0.345	0.265	CTX	CYCS	CTX	Human	0.00149391	98
3.76386e-14	0.375369	0.148	0.077	CTX	HMGCS1	CTX	Human	0.000799481	98
4.71201e-07	0.358209	0.243	0.177	CTX	CYC1	CTX	Human	0.00109646	98
1.41441e-13	0.357835	0.142	0.072	CTX	MAPRE3	CTX	Human	0.000363856	98
1.2696e-10	0.353538	0.132	0.079	CTX	RSRP1	CTX	Human	0.00156285	98
2.14381e-06	0.341791	0.364	0.276	CTX	OCIAD1	CTX	Human	0.00186037	98
3.54127e-10	0.340043	0.108	0.05	CTX	PINK1	CTX	Human	0.000415997	98
1.47706e-11	0.33817	0.145	0.08	CTX	HIP1R	CTX	Human	0.00143018	98
6.93618e-13	0.316413	0.408	0.313	CTX	SCAND1	CTX	Human	0.000192817	98
8.41061e-09	0.311761	0.131	0.068	CTX	FBXW11	CTX	Human	0.00278118	98
1.50049e-19	0.513549	0.108	0.035	CTX	ASIC1	CTX	Human	5.64716e-11	97
1.8022e-12	0.406283	0.101	0.039	CTX	TMEM158	CTX	Human	2.3668e-07	97
3.18015e-11	0.395042	0.2	0.12	CTX	IMP3	CTX	Human	0.000238154	97
4.20487e-09	0.392097	0.198	0.126	CTX	MAP2K2	CTX	Human	0.000572728	97
5.43841e-10	0.388234	0.285	0.212	CTX	HSP90B1	CTX	Human	0.000167897	97
4.56007e-09	0.386709	0.196	0.134	CTX	CLSTN1	CTX	Human	0.000993308	97
1.43342e-13	0.375077	0.29	0.199	CTX	SLC39A10	CTX	Human	0.00125224	97
7.23662e-10	0.360948	0.148	0.086	CTX	VTI1B	CTX	Human	0.000834527	97
1.20606e-10	0.35576	0.208	0.133	CTX	GTF3A	CTX	Human	0.00156534	97
2.12869e-11	0.349779	0.201	0.122	CTX	NDUFAF2	CTX	Human	0.000327433	97
5.71444e-09	0.34159	0.213	0.143	CTX	FAM107B	CTX	Human	0.000786437	97
5.66031e-20	0.777077	0.108	0.029	CTX	NKAIN2	CTX	Human	1.27063e-09	96
1.15693e-10	0.38435	0.203	0.122	CTX	ITFG1	CTX	Human	0.000748002	96
3.23072e-13	0.378719	0.185	0.11	CTX	SCN3A	CTX	Human	0.000356124	96
5.92282e-09	0.376319	0.168	0.109	CTX	CDKN2D	CTX	Human	0.000394457	96
2.94218e-11	0.355656	0.39	0.307	CTX	ATXN10	CTX	Human	0.00104368	96
1.59085e-08	0.352503	0.19	0.12	CTX	ENOPH1	CTX	Human	0.000692402	96
1.61713e-11	0.324414	0.112	0.054	CTX	UROS	CTX	Human	0.000836373	96
4.7312e-08	0.319544	0.277	0.21	CTX	TM2D3	CTX	Human	0.00210816	96
1.26262e-07	0.314046	0.124	0.069	CTX	AGTPBP1	CTX	Human	0.00119405	96
1.36304e-08	0.382643	0.234	0.165	CTX	YPEL3	CTX	Human	0.00128621	95
2.23475e-06	0.354245	0.253	0.184	CTX	MTCH1	CTX	Human	0.00130744	95
2.53455e-09	0.336008	0.378	0.289	CTX	NDUFB1	CTX	Human	0.00108469	95
1.08721e-07	0.32897	0.123	0.067	CTX	NAP1L5	CTX	Human	0.0011476	95
6.56435e-13	0.328061	0.429	0.326	CTX	SNX3	CTX	Human	0.000854547	95
2.89496e-09	0.322726	0.325	0.261	CTX	PDCD5	CTX	Human	0.0025627	95
7.32279e-09	0.321531	0.133	0.073	CTX	ACBD3	CTX	Human	0.00187814	95
4.6378e-14	0.29348	0.591	0.514	CTX	SEC61G	CTX	Human	0.0012547	95
5.13133e-08	0.370782	0.248	0.18	CTX	AMER2	CTX	Human	0.000597395	94
1.15254e-09	0.36545	0.223	0.147	CTX	TMEM160	CTX	Human	0.00165644	94
7.25081e-12	0.352947	0.183	0.118	CTX	SCAMP1	CTX	Human	0.0019477	94
2.56031e-08	0.335905	0.165	0.106	CTX	SCD5	CTX	Human	0.00236818	94
9.30884e-08	0.332603	0.318	0.25	CTX	KIFAP3	CTX	Human	0.00298535	94
7.48797e-12	0.330743	0.226	0.152	CTX	BOD1	CTX	Human	0.00226285	94
1.6452e-08	0.323916	0.217	0.139	CTX	POP7	CTX	Human	0.00138116	94
2.074e-07	0.365552	0.211	0.148	CTX	THOC7	CTX	Human	0.00113144	93
1.11745e-07	0.363853	0.174	0.118	CTX	STXBP1	CTX	Human	0.00135256	93
2.17867e-08	0.341514	0.28	0.215	CTX	SEC11C	CTX	Human	0.00227936	93
1.31899e-08	0.332014	0.213	0.14	CTX	SMCHD1	CTX	Human	0.00161102	93
5.39188e-08	0.33073	0.331	0.247	CTX	SPTAN1	CTX	Human	0.00233888	93
6.09195e-13	0.326367	0.17	0.099	CTX	TSEN34	CTX	Human	0.00279827	93
1.04344e-14	0.274718	0.673	0.585	CTX	COX6C	CTX	Human	0.000556325	93
4.73878e-08	0.370293	0.283	0.21	CTX	NPDC1	CTX	Human	0.00259796	92
1.61569e-10	0.342849	0.217	0.138	CTX	C8orf33	CTX	Human	0.00166133	92
7.85631e-11	0.32519	0.397	0.314	CTX	VDAC1	CTX	Human	0.00231539	92
8.84144e-11	0.322937	0.275	0.2	CTX	TRAPPC4	CTX	Human	0.00186754	92
8.16474e-12	0.319612	0.106	0.057	CTX	HMGCR	CTX	Human	0.00136824	92
1.88334e-10	0.307199	0.142	0.079	CTX	LDHA	CTX	Human	0.0017866	92
2.32889e-08	0.300798	0.117	0.061	CTX	MSL3	CTX	Human	0.00330721	92
1.48482e-06	0.293315	0.102	0.056	CTX	UBAC1	CTX	Human	0.00158133	92
6.21817e-09	0.475492	0.154	0.099	CTX	SYNPR	CTX	Human	0.00312026	91
2.58909e-07	0.341447	0.189	0.127	CTX	GLRX5	CTX	Human	0.00384585	91
4.86142e-09	0.336261	0.274	0.2	CTX	SLC25A4	CTX	Human	0.00263208	91
2.54168e-08	0.325926	0.298	0.211	CTX	KDM1A	CTX	Human	0.00205183	91
1.95272e-08	0.317345	0.245	0.174	CTX	GTF2H5	CTX	Human	0.00159088	91
8.0709e-09	0.273459	0.622	0.576	CTX	GABARAPL2	CTX	Human	0.0037971	91
1.93321e-06	0.362031	0.202	0.139	CTX	PTP4A2	CTX	Human	0.00216905	90
8.91334e-08	0.340018	0.157	0.097	CTX	CMAS	CTX	Human	0.00333249	90
6.57934e-11	0.332117	0.24	0.168	CTX	GSTM3	CTX	Human	0.00301429	90
1.35842e-11	0.325993	0.105	0.051	CTX	SMARCA2	CTX	Human	0.0014875	90
3.63521e-11	0.314365	0.115	0.059	CTX	ING2	CTX	Human	0.00260361	90
3.18106e-11	0.313468	0.307	0.226	CTX	RRAGA	CTX	Human	0.00211663	90
2.43289e-07	0.312448	0.118	0.063	CTX	TUSC1	CTX	Human	0.00316743	90
1.38889e-08	0.310935	0.183	0.118	CTX	ELOVL6	CTX	Human	0.00255554	90
1.46842e-08	0.304036	0.122	0.072	CTX	REXO4	CTX	Human	0.00342535	90
3.82959e-09	0.302022	0.467	0.387	CTX	VDAC3	CTX	Human	0.00298373	90
1.75923e-08	0.291051	0.478	0.397	CTX	INA	CTX	Human	0.00290927	90
1.14955e-10	0.285621	0.405	0.321	CTX	SMARCB1	CTX	Human	0.00129128	90
4.73264e-11	0.381517	0.111	0.059	CTX	GRID2	CTX	Human	0.00148398	89
1.1429e-12	0.339139	0.198	0.127	CTX	KRAS	CTX	Human	0.0018506	89
2.10542e-06	0.351369	0.205	0.143	CTX	IRF2BPL	CTX	Human	0.00244248	88
5.40763e-09	0.331912	0.172	0.115	CTX	TMEM183A	CTX	Human	0.00297122	88
1.81563e-07	0.331425	0.204	0.152	CTX	TSPAN5	CTX	Human	0.00357554	88
2.81986e-08	0.329715	0.171	0.108	CTX	SNN	CTX	Human	0.00321899	88
1.15138e-10	0.30613	0.153	0.094	CTX	CFAP36	CTX	Human	0.00324453	88
2.97679e-12	0.329252	0.289	0.197	CTX	SIAH1	CTX	Human	0.00271703	87
3.31234e-15	0.323385	0.366	0.27	CTX	KLC1	CTX	Human	0.00379093	87
1.83992e-07	0.317833	0.147	0.09	CTX	CHCHD6	CTX	Human	0.00310629	87
6.86291e-07	0.315276	0.168	0.112	CTX	APPL1	CTX	Human	0.00344599	87
2.02967e-08	0.313462	0.146	0.087	CTX	SUDS3	CTX	Human	0.00188718	87
1.82812e-26	0.538629	0.108	0.027	CTX	CCDC184	CTX	Human	9.51065e-16	86
2.84869e-14	0.375652	0.156	0.089	CTX	TTC28	CTX	Human	0.00410474	86
2.04907e-13	0.357178	0.42	0.336	CTX	STMN4	CTX	Human	0.0021947	86
1.66568e-09	0.304434	0.125	0.074	CTX	DNMT1	CTX	Human	0.00236473	86
6.04172e-07	0.298643	0.158	0.102	CTX	KPNA4	CTX	Human	0.00334507	86
2.35908e-07	0.296839	0.106	0.057	CTX	NCS1	CTX	Human	0.000819062	86
6.52644e-45	0.97376	0.1	0.004	CTX	IGF1	CTX	Human	2.3578e-36	85
1.13148e-08	0.344547	0.24	0.171	CTX	POLR2L	CTX	Human	0.00490911	85
1.07305e-06	0.315233	0.315	0.241	CTX	ODC1	CTX	Human	0.00340447	85
3.04504e-08	0.365461	0.339	0.278	CTX	FKBP1A	CTX	Human	0.00435487	84
4.88388e-07	0.33471	0.54	0.5	CTX	CBX3	CTX	Human	0.00289404	84
9.76061e-11	0.331002	0.254	0.172	CTX	PHF20L1	CTX	Human	0.00484312	84
3.40806e-06	0.324992	0.149	0.096	CTX	GNPTAB	CTX	Human	0.00286984	84
3.96336e-08	0.315625	0.175	0.115	CTX	ZC3H6	CTX	Human	0.00466736	84
7.65647e-09	0.295949	0.125	0.07	CTX	NUDT16L1	CTX	Human	0.00249663	84
4.99567e-09	0.278318	0.133	0.068	CTX	NFIL3	CTX	Human	0.0035306	84
3.65861e-11	0.324239	0.361	0.29	CTX	PRPF4B	CTX	Human	0.00399429	83
1.29986e-06	0.315618	0.181	0.114	CTX	DUSP26	CTX	Human	0.00267991	83
1.21491e-10	0.301568	0.159	0.09	CTX	SLBP	CTX	Human	0.00524077	83
5.24131e-09	0.294811	0.107	0.057	CTX	FBXL15	CTX	Human	0.00431344	83
1.91745e-09	0.310235	0.103	0.055	CTX	RFK	CTX	Human	0.000808658	82
2.87955e-07	0.286896	0.506	0.439	CTX	DDX17	CTX	Human	0.00341616	82
1.14182e-07	0.330473	0.18	0.122	CTX	TUSC3	CTX	Human	0.00377156	81
9.76676e-09	0.3222	0.247	0.184	CTX	AK1	CTX	Human	0.0058832	81
1.39563e-08	0.305286	0.106	0.057	CTX	SAMD1	CTX	Human	0.00292331	81
2.33073e-06	0.291725	0.112	0.072	CTX	CDKN1C	CTX	Human	0.00426244	81
7.40542e-09	0.284488	0.122	0.061	CTX	SURF6	CTX	Human	0.0024746	81
1.24694e-06	0.282936	0.137	0.081	CTX	PTPRR	CTX	Human	0.00430918	81
3.78502e-11	0.294942	0.318	0.228	CTX	EIF2S2	CTX	Human	0.00587685	80
3.66595e-08	0.33041	0.221	0.159	CTX	PPP3CA	CTX	Human	0.00484278	79
1.9803e-12	0.320455	0.24	0.165	CTX	MRPL20	CTX	Human	0.00277081	79
6.31274e-07	0.316326	0.43	0.346	CTX	PSMB5	CTX	Human	0.00423397	79
1.14848e-11	0.31214	0.16	0.095	CTX	ATP1B3	CTX	Human	0.00247133	79
2.40723e-07	0.292269	0.439	0.374	CTX	UBE2V2	CTX	Human	0.00525434	79
7.57645e-08	0.26032	0.582	0.492	CTX	KIDINS220	CTX	Human	0.00300873	79
2.7833e-12	0.342536	0.271	0.193	CTX	SMS	CTX	Human	0.00286002	78
1.56392e-06	0.304742	0.161	0.108	CTX	ACSL3	CTX	Human	0.00417994	78
8.41476e-07	0.290822	0.152	0.098	CTX	PPM1K	CTX	Human	0.00470226	78
2.21511e-06	0.281457	0.359	0.296	CTX	ZC3H15	CTX	Human	0.00401047	78
1.16963e-15	0.250587	0.709	0.618	CTX	FEZ1	CTX	Human	0.000177819	78
1.02547e-17	0.375501	0.103	0.037	CTX	DKK3	CTX	Human	6.92062e-06	77
1.1249e-14	0.387139	0.104	0.042	CTX	FNDC4	CTX	Human	2.3041e-07	76
1.48911e-08	0.308168	0.145	0.084	CTX	ZNF883	CTX	Human	0.00416865	76
3.51158e-13	0.295986	0.137	0.075	CTX	MAP9	CTX	Human	0.00383403	76
8.00014e-08	0.285066	0.469	0.396	CTX	MYCBP2	CTX	Human	0.00463439	76
5.91621e-09	0.329784	0.229	0.153	CTX	ACAT2	CTX	Human	0.0053086	75
1.45828e-06	0.315564	0.149	0.098	CTX	NME3	CTX	Human	0.00543956	75
2.55695e-08	0.288114	0.364	0.278	CTX	MAP1LC3B	CTX	Human	0.00488195	75
1.07045e-14	0.343711	0.101	0.047	CTX	TPST1	CTX	Human	0.000150917	74
2.58458e-06	0.324558	0.131	0.08	CTX	PPFIA2	CTX	Human	0.00478121	74
6.48239e-07	0.306932	0.185	0.136	CTX	LSM4	CTX	Human	0.00462763	74
1.27866e-06	0.287311	0.147	0.089	CTX	SLC4A7	CTX	Human	0.00406137	74
4.29787e-08	0.280004	0.474	0.402	CTX	NDUFC2	CTX	Human	0.00343582	74
1.54566e-08	0.353443	0.131	0.08	CTX	MAGI2	CTX	Human	0.00626993	73
2.99223e-07	0.319145	0.295	0.226	CTX	AURKAIP1	CTX	Human	0.00302455	73
4.48837e-08	0.28539	0.255	0.191	CTX	EIF3J	CTX	Human	0.00750856	73
1.46584e-10	0.281568	0.33	0.251	CTX	NDUFS6	CTX	Human	0.00445346	72
2.75282e-10	0.278853	0.367	0.28	CTX	ATXN7L3B	CTX	Human	0.00447981	72
2.23046e-07	0.371041	0.235	0.184	CTX	ROBO1	CTX	Human	0.00536759	71
1.98341e-08	0.330801	0.263	0.19	CTX	MYEF2	CTX	Human	0.00290046	71
3.19544e-06	0.318901	0.195	0.141	CTX	MOAP1	CTX	Human	0.00524917	71
6.43156e-09	0.283265	0.16	0.105	CTX	CCDC107	CTX	Human	0.0057886	71
2.24149e-10	0.280351	0.514	0.44	CTX	UQCRQ	CTX	Human	0.00457272	71
1.5275e-08	0.309369	0.307	0.242	CTX	TOP1	CTX	Human	0.00477	69
3.4574e-08	0.298214	0.19	0.12	CTX	PUS7L	CTX	Human	0.00774854	69
2.51852e-09	0.282738	0.241	0.164	CTX	MTUS1	CTX	Human	0.00473792	69
1.59997e-06	0.273989	0.243	0.171	CTX	MRPL57	CTX	Human	0.00630421	69
1.06503e-06	0.262241	0.537	0.464	CTX	PFDN2	CTX	Human	0.00326154	69
1.16543e-10	0.26111	0.489	0.407	CTX	COX7B	CTX	Human	0.00295434	69
2.76707e-09	0.322924	0.245	0.183	CTX	SLC25A36	CTX	Human	0.0055125	68
2.17139e-10	0.314826	0.211	0.144	CTX	GOPC	CTX	Human	0.00624248	68
4.48336e-09	0.304063	0.143	0.094	CTX	COX17	CTX	Human	0.00523534	68
3.38317e-06	0.299523	0.137	0.094	CTX	KNOP1	CTX	Human	0.00489885	68
7.83998e-09	0.284349	0.149	0.09	CTX	SLC25A11	CTX	Human	0.00481915	68
1.33144e-06	0.40948	0.224	0.164	CTX	LRRC7	CTX	Human	0.00691992	67
9.16382e-12	0.304005	0.249	0.174	CTX	EI24	CTX	Human	0.00716758	67
2.52813e-06	0.299	0.218	0.152	CTX	CELF5	CTX	Human	0.00731269	67
1.29503e-08	0.292294	0.218	0.155	CTX	BRD9	CTX	Human	0.00682829	67
3.23767e-07	0.285816	0.14	0.093	CTX	NUDCD3	CTX	Human	0.00577318	67
5.46402e-11	0.273436	0.109	0.061	CTX	YTHDC2	CTX	Human	0.00411754	67
5.52751e-09	0.30353	0.266	0.188	CTX	RBM17	CTX	Human	0.00903366	66
1.98576e-06	0.280937	0.151	0.103	CTX	DUT	CTX	Human	0.0112282	66
1.35578e-08	0.311057	0.176	0.119	CTX	THY1	CTX	Human	0.00652488	65
9.4448e-12	0.302191	0.153	0.099	CTX	BLCAP	CTX	Human	0.00588669	65
1.05584e-06	0.256319	0.588	0.519	CTX	UBL5	CTX	Human	0.00267784	65
2.14612e-06	0.301355	0.133	0.086	CTX	NXT1	CTX	Human	0.00855884	64
1.1583e-06	0.271847	0.447	0.377	CTX	HNRNPD	CTX	Human	0.00635714	64
1.57123e-06	0.359465	0.147	0.1	CTX	ZBTB18	CTX	Human	0.00582695	63
2.98806e-06	0.314991	0.109	0.066	CTX	BACH2	CTX	Human	0.0083669	63
1.83948e-07	0.311973	0.231	0.177	CTX	SOBP	CTX	Human	0.00758528	63
2.62431e-06	0.316472	0.22	0.152	CTX	COMMD7	CTX	Human	0.00730484	62
1.55978e-06	0.314841	0.232	0.168	CTX	PAIP1	CTX	Human	0.00463474	62
4.82238e-08	0.257397	0.564	0.501	CTX	HNRNPM	CTX	Human	0.00124562	62
2.97697e-08	0.262572	0.528	0.466	CTX	NDUFA5	CTX	Human	0.00559259	61
1.027e-08	0.31509	0.182	0.122	CTX	GCSH	CTX	Human	0.00825554	60
2.97146e-07	0.338873	0.24	0.188	CTX	MSRA	CTX	Human	0.00780033	59
1.29428e-07	0.305106	0.228	0.158	CTX	PSMA2	CTX	Human	0.00755461	59
5.13442e-07	0.332109	0.209	0.15	CTX	MSMO1	CTX	Human	0.00706272	57
7.02771e-07	0.305771	0.168	0.113	CTX	GNG3	CTX	Human	0.00690452	57
3.81164e-08	0.268136	0.108	0.065	CTX	TUSC2	CTX	Human	0.00463136	57
4.79661e-08	0.309216	0.18	0.14	CTX	ANKRD46	CTX	Human	0.00533098	56
4.38312e-09	0.30849	0.283	0.217	CTX	EIF5A	CTX	Human	0.00706846	56
7.22589e-07	0.296093	0.213	0.156	CTX	GSPT1	CTX	Human	0.00767129	56
1.43782e-07	0.284273	0.176	0.112	CTX	SUGP2	CTX	Human	0.00517051	56
1.93469e-06	0.28339	0.348	0.274	CTX	VPS29	CTX	Human	0.00961096	56
1.79052e-09	0.27104	0.126	0.074	CTX	B4GALNT4	CTX	Human	0.00546688	56
3.74289e-08	0.27259	0.157	0.1	CTX	SRRM3	CTX	Human	0.00818934	55
1.12558e-22	0.593517	0.1	0.023	CTX	DOK5	CTX	Human	3.237e-20	54
3.45388e-06	0.282209	0.235	0.184	CTX	TIPRL	CTX	Human	0.00795146	54
8.7401e-10	0.280863	0.225	0.158	CTX	CTCF	CTX	Human	0.0113049	54
6.12501e-08	0.26091	0.118	0.074	CTX	PDIK1L	CTX	Human	0.0103542	54
1.4543e-14	0.244366	0.865	0.774	CTX	BTG1	CTX	Human	2.01749e-06	54
6.0338e-08	0.28491	0.159	0.105	CTX	PIAS2	CTX	Human	0.00946217	53
6.82233e-07	0.282096	0.145	0.101	CTX	NSUN6	CTX	Human	0.00759029	53
1.92905e-08	0.267782	0.136	0.08	CTX	PRKACB	CTX	Human	0.00742336	53
1.14018e-07	0.30409	0.215	0.155	CTX	ARL6IP4	CTX	Human	0.00573907	52
1.51291e-08	0.286313	0.141	0.086	CTX	PTPN11	CTX	Human	0.00848571	52
5.29512e-13	0.288521	0.1	0.052	CTX	CD47	CTX	Human	0.00179014	51
5.83136e-08	0.265312	0.105	0.061	CTX	CEBPZOS	CTX	Human	0.0034968	51
9.47254e-07	0.260097	0.102	0.062	CTX	HSD17B4	CTX	Human	0.00657124	51
1.5082e-06	0.293234	0.222	0.163	CTX	CFL2	CTX	Human	0.00674338	50
2.43246e-06	0.269478	0.127	0.08	CTX	TACC2	CTX	Human	0.0064328	50
1.05446e-07	0.25426	0.119	0.066	CTX	INPP5F	CTX	Human	0.00534602	50
3.17998e-07	0.30015	0.145	0.095	CTX	TMX4	CTX	Human	0.00804559	49
1.04818e-08	0.293986	0.163	0.111	CTX	ARHGEF12	CTX	Human	0.0104908	49
4.5072e-08	0.286363	0.306	0.242	CTX	PTBP2	CTX	Human	0.00635862	49
4.32442e-07	0.281455	0.198	0.137	CTX	AMD1	CTX	Human	0.00867891	49
2.90416e-08	0.275269	0.31	0.251	CTX	AP2S1	CTX	Human	0.0102672	49
8.31035e-08	0.274545	0.173	0.119	CTX	NOVA1	CTX	Human	0.00629156	49
1.13667e-09	0.262712	0.374	0.298	CTX	RNMT	CTX	Human	0.00630403	49
3.14179e-09	0.26043	0.121	0.073	CTX	ACYP1	CTX	Human	0.00798585	49
2.31381e-08	0.259236	0.384	0.307	CTX	NDUFA12	CTX	Human	0.00586567	49
5.82913e-10	0.250281	0.455	0.376	CTX	UBE2D2	CTX	Human	0.00189799	49
4.20095e-08	0.420804	0.104	0.056	CTX	RPRM	CTX	Human	0.00601832	48
9.78145e-07	0.298889	0.384	0.331	CTX	LMO4	CTX	Human	0.00959396	48
1.18697e-08	0.283918	0.282	0.224	CTX	PSMB3	CTX	Human	0.010607	48
3.10998e-08	0.2818	0.135	0.085	CTX	USF2	CTX	Human	0.00634643	48
2.31416e-07	0.277262	0.379	0.314	CTX	YTHDC1	CTX	Human	0.00934155	48
9.84506e-08	0.266672	0.118	0.076	CTX	MEF2A	CTX	Human	0.00848644	48
1.76963e-09	0.289281	0.102	0.052	CTX	EID2	CTX	Human	0.00144594	47
4.88458e-09	0.285738	0.17	0.112	CTX	BAG1	CTX	Human	0.00954989	47
1.39802e-06	0.275808	0.142	0.088	CTX	PTPN2	CTX	Human	0.00629588	47
1.94477e-11	0.271051	0.104	0.057	CTX	PKIG	CTX	Human	0.00730081	47
3.20065e-10	0.292368	0.187	0.133	CTX	CHGB	CTX	Human	0.0096533	46
1.03585e-09	0.281359	0.209	0.157	CTX	PDIA3	CTX	Human	0.00711957	46
1.31474e-06	0.299229	0.243	0.192	CTX	MED19	CTX	Human	0.0138826	45
7.47871e-08	0.288051	0.136	0.087	CTX	STX2	CTX	Human	0.00827054	45
6.60084e-07	0.258625	0.122	0.072	CTX	VPS36	CTX	Human	0.00809347	45
2.97514e-07	0.301814	0.241	0.188	CTX	FDPS	CTX	Human	0.00499028	44
1.87049e-07	0.287474	0.185	0.132	CTX	VOPP1	CTX	Human	0.0121653	44
4.97209e-07	0.259271	0.32	0.258	CTX	DGUOK	CTX	Human	0.00999806	44
1.27036e-08	0.273441	0.14	0.097	CTX	NRBP1	CTX	Human	0.00615376	43
2.38877e-10	0.265185	0.347	0.278	CTX	CBX5	CTX	Human	0.00762792	43
1.9001e-06	0.250058	0.278	0.209	CTX	ZNF821	CTX	Human	0.0103404	43
6.07925e-09	0.333026	0.101	0.057	CTX	ERC2	CTX	Human	0.00263476	42
5.86113e-09	0.283982	0.154	0.103	CTX	SUMO3	CTX	Human	0.00885282	42
2.7994e-06	0.282567	0.119	0.073	CTX	NENF	CTX	Human	0.0104466	42
2.30335e-08	0.257133	0.517	0.45	CTX	NUCKS1	CTX	Human	0.00574767	42
6.81602e-48	0.783554	0.1	0.002	CTX	NEUROD6	CTX	Human	2.88289e-37	41
2.33455e-20	0.418037	0.1	0.035	CTX	NRSN1	CTX	Human	5.53374e-07	41
2.71284e-07	0.266266	0.137	0.089	CTX	NLN	CTX	Human	0.00637334	41
8.91519e-11	0.239391	0.651	0.562	CTX	SFPQ	CTX	Human	0.000164741	41
9.53069e-10	0.414281	0.142	0.094	CTX	VIP	CTX	Human	0.007205	40
2.0708e-07	0.281631	0.15	0.104	CTX	PHYHIPL	CTX	Human	0.0094718	40
6.32549e-08	0.268535	0.226	0.168	CTX	TMEM167A	CTX	Human	0.0094655	40
1.0609e-07	0.27294	0.195	0.147	CTX	PAXBP1	CTX	Human	0.00833702	39
1.83677e-08	0.27114	0.113	0.068	CTX	EBP	CTX	Human	0.00560834	39
1.49396e-07	0.269222	0.137	0.09	CTX	DNAJB2	CTX	Human	0.00775121	39
1.4936e-07	0.263473	0.108	0.065	CTX	FNIP1	CTX	Human	0.00939831	39
5.00608e-07	0.271026	0.45	0.372	CTX	CCDC112	CTX	Human	0.0125072	38
3.77019e-07	0.265001	0.184	0.127	CTX	LEO1	CTX	Human	0.0063406	38
1.43083e-07	0.26421	0.216	0.16	CTX	SHOC2	CTX	Human	0.0111475	38
2.12496e-07	0.260667	0.481	0.417	CTX	ARPC2	CTX	Human	0.0109806	38
1.76834e-07	0.332945	0.155	0.109	CTX	CTNND2	CTX	Human	0.0112826	37
1.72033e-07	0.277522	0.166	0.116	CTX	ARL4A	CTX	Human	0.00919568	37
7.9267e-07	0.274532	0.249	0.201	CTX	COMMD3	CTX	Human	0.00776772	37
2.0968e-07	0.261201	0.152	0.1	CTX	ZMYND11	CTX	Human	0.00656401	37
3.1349e-06	0.259418	0.122	0.082	CTX	KCNMB4	CTX	Human	0.00608226	37
1.88694e-07	0.256068	0.147	0.102	CTX	ATP6AP1	CTX	Human	0.0106734	37
2.36154e-06	0.292779	0.268	0.221	CTX	SQLE	CTX	Human	0.00876542	36
1.05404e-06	0.282374	0.162	0.107	CTX	WDR60	CTX	Human	0.00642985	36
8.07099e-07	0.27287	0.293	0.23	CTX	MDH1	CTX	Human	0.0091206	36
1.52883e-09	0.267978	0.318	0.251	CTX	SPCS1	CTX	Human	0.00860118	36
2.78787e-07	0.263889	0.187	0.119	CTX	CSNK1G3	CTX	Human	0.0071519	36
1.05066e-07	0.255801	0.394	0.322	CTX	NDUFAB1	CTX	Human	0.00879765	36
1.24667e-15	0.335318	0.102	0.047	CTX	SCAMP5	CTX	Human	6.53415e-06	35
2.69829e-06	0.282187	0.327	0.265	CTX	OSBPL8	CTX	Human	0.00836766	35
9.84253e-08	0.279992	0.248	0.187	CTX	AASDHPPT	CTX	Human	0.00688421	35
6.93303e-07	0.273536	0.191	0.137	CTX	ISCU	CTX	Human	0.0140976	35
6.2094e-07	0.262203	0.169	0.124	CTX	PRPSAP1	CTX	Human	0.0106504	35
6.65702e-07	0.250188	0.468	0.4	CTX	SRRM2	CTX	Human	0.0046203	35
1.86692e-08	0.303056	0.1	0.054	CTX	R3HDM1	CTX	Human	0.000862536	34
2.64899e-08	0.276438	0.283	0.219	CTX	UBA2	CTX	Human	0.0104166	34
1.63004e-06	0.27023	0.16	0.117	CTX	CCSAP	CTX	Human	0.00625419	34
3.10958e-07	0.261661	0.104	0.057	CTX	RFX1	CTX	Human	0.00441583	34
1.29737e-06	0.261445	0.273	0.214	CTX	EIF5B	CTX	Human	0.0122687	34
4.58706e-07	0.24947	0.55	0.485	CTX	PSMA7	CTX	Human	0.0136295	34
1.43968e-08	0.27253	0.139	0.096	CTX	DAZAP1	CTX	Human	0.0136415	33
2.7692e-08	0.272254	0.195	0.127	CTX	HERC2	CTX	Human	0.00830026	33
1.54897e-13	0.269781	0.369	0.288	CTX	KIF3A	CTX	Human	0.0079312	33
2.29492e-06	0.26906	0.362	0.296	CTX	NCOR1	CTX	Human	0.0105744	33
7.01689e-07	0.267485	0.159	0.108	CTX	USP14	CTX	Human	0.0118525	33
2.07616e-06	0.327027	0.231	0.179	CTX	ZNF536	CTX	Human	0.00819267	32
2.48456e-07	0.292869	0.13	0.093	CTX	SPOCK1	CTX	Human	0.0154165	32
1.24442e-11	0.272683	0.231	0.166	CTX	CAPRIN1	CTX	Human	0.00875106	32
3.91706e-09	0.266279	0.147	0.098	CTX	BCL7C	CTX	Human	0.00714156	32
5.36302e-08	0.264154	0.155	0.099	CTX	RASSF2	CTX	Human	0.00817445	32
4.89547e-09	0.260786	0.17	0.106	CTX	DLL3	CTX	Human	0.00820479	32
9.66117e-08	0.255553	0.105	0.062	CTX	TSR3	CTX	Human	0.00717178	32
8.22061e-07	0.253098	0.507	0.435	CTX	ETFB	CTX	Human	0.00490671	32
7.06461e-10	0.289038	0.196	0.146	CTX	MLLT3	CTX	Human	0.0116558	31
3.0627e-06	0.279518	0.231	0.178	CTX	PDIA6	CTX	Human	0.0132438	31
1.9327e-06	0.274264	0.243	0.185	CTX	ARL5A	CTX	Human	0.0152631	31
3.39371e-08	0.255292	0.105	0.063	CTX	BAX	CTX	Human	0.0124988	31
1.11152e-07	0.271686	0.268	0.208	CTX	BLOC1S6	CTX	Human	0.0102155	30
9.71149e-09	0.262815	0.386	0.325	CTX	KLHL35	CTX	Human	0.00943007	30
1.51985e-10	0.262014	0.106	0.062	CTX	PDCD2	CTX	Human	0.00755425	30
6.29026e-07	0.260083	0.137	0.086	CTX	TOMM40	CTX	Human	0.0125656	30
6.46048e-07	0.25499	0.373	0.319	CTX	PDAP1	CTX	Human	0.0066128	30
3.4128e-06	0.253958	0.124	0.082	CTX	CAMK1D	CTX	Human	0.0102064	30
3.35335e-06	0.250228	0.132	0.091	CTX	ILKAP	CTX	Human	0.0120624	30
1.91157e-06	0.289835	0.171	0.119	CTX	EMC6	CTX	Human	0.00595376	29
7.94706e-07	0.285594	0.16	0.113	CTX	IDS	CTX	Human	0.0161504	29
5.32741e-07	0.282533	0.278	0.221	CTX	PLEKHO1	CTX	Human	0.0107486	29
3.00565e-07	0.278697	0.202	0.152	CTX	SSU72	CTX	Human	0.0119243	29
4.69565e-09	0.277915	0.363	0.304	CTX	TPI1	CTX	Human	0.0120116	29
2.70168e-06	0.276427	0.153	0.104	CTX	IER3IP1	CTX	Human	0.0106382	29
9.62894e-08	0.266374	0.163	0.121	CTX	RNF11	CTX	Human	0.0122746	29
2.28272e-08	0.254632	0.192	0.133	CTX	MRPL52	CTX	Human	0.0128284	29
1.7919e-07	0.243279	0.103	0.063	CTX	REV1	CTX	Human	0.00803508	29
2.31896e-06	0.279822	0.143	0.101	CTX	ARF3	CTX	Human	0.0162325	28
9.51697e-07	0.275548	0.218	0.163	CTX	NDUFS8	CTX	Human	0.0111223	28
4.50388e-07	0.252962	0.444	0.382	CTX	KIF21A	CTX	Human	0.0136159	28
6.7376e-08	0.238578	0.581	0.523	CTX	TCEAL4	CTX	Human	0.00533405	28
4.13591e-11	0.274017	0.294	0.222	CTX	TMPO	CTX	Human	0.00881428	27
7.53978e-08	0.268552	0.43	0.373	CTX	NDUFB10	CTX	Human	0.00574916	27
2.02547e-07	0.267242	0.156	0.106	CTX	ARL8A	CTX	Human	0.00909702	27
3.98302e-09	0.266557	0.148	0.094	CTX	ZMYND8	CTX	Human	0.0052275	27
6.94237e-08	0.264429	0.19	0.13	CTX	ZNF32	CTX	Human	0.0136927	27
5.07142e-07	0.260315	0.13	0.085	CTX	LPGAT1	CTX	Human	0.00929423	27
3.51882e-07	0.258304	0.272	0.213	CTX	PGLS	CTX	Human	0.00868758	27
1.9866e-08	0.257457	0.18	0.133	CTX	NUDT4	CTX	Human	0.0086605	27
1.15676e-06	0.249135	0.135	0.088	CTX	FAM171A2	CTX	Human	0.00696768	27
7.12118e-10	0.385244	0.105	0.058	CTX	RIMS2	CTX	Human	0.00901921	26
1.96203e-11	0.314625	0.1	0.042	CTX	SLC6A1	CTX	Human	0.000463786	26
8.28915e-09	0.285313	0.102	0.053	CTX	ASAH1	CTX	Human	0.00265858	26
3.8558e-10	0.283012	0.149	0.096	CTX	INTS10	CTX	Human	0.0112477	26
9.88764e-09	0.271032	0.117	0.069	CTX	QDPR	CTX	Human	0.0117261	26
1.73726e-08	0.267507	0.326	0.249	CTX	KIF1A	CTX	Human	0.00949972	26
4.67737e-07	0.262402	0.114	0.074	CTX	MACROD1	CTX	Human	0.00887117	26
3.24899e-11	0.255511	0.146	0.097	CTX	RNF115	CTX	Human	0.00694878	26
1.83239e-06	0.255435	0.454	0.395	CTX	PRMT2	CTX	Human	0.0120966	26
8.37088e-09	0.248546	0.105	0.065	CTX	CDK5	CTX	Human	0.00962411	26
1.1621e-11	0.315127	0.105	0.058	CTX	CDK14	CTX	Human	0.00381276	25
2.15492e-09	0.282164	0.196	0.145	CTX	KCNQ2	CTX	Human	0.00975015	25
4.6282e-09	0.26278	0.176	0.124	CTX	PSMD1	CTX	Human	0.00526653	25
7.34973e-07	0.261051	0.105	0.058	CTX	CPNE2	CTX	Human	0.00866127	25
3.79143e-10	0.25305	0.119	0.072	CTX	CDC42SE1	CTX	Human	0.00475134	25
1.76546e-07	0.249722	0.483	0.435	CTX	RDX	CTX	Human	0.0100466	25
2.5112e-07	0.323527	0.34	0.286	CTX	SSBP2	CTX	Human	0.0157731	24
2.87018e-08	0.270545	0.218	0.161	CTX	SNF8	CTX	Human	0.0102756	24
4.76434e-10	0.267871	0.102	0.058	CTX	HMOX2	CTX	Human	0.00340686	24
2.56391e-07	0.25685	0.433	0.369	CTX	SAT2	CTX	Human	0.0050635	24
3.39444e-06	0.250266	0.483	0.429	CTX	PRDX1	CTX	Human	0.0105078	24
1.12263e-20	0.433129	0.101	0.03	CTX	LAGE3	CTX	Human	1.19282e-11	23
1.36224e-06	0.277725	0.224	0.175	CTX	CMPK1	CTX	Human	0.0130188	23
3.72548e-08	0.268244	0.434	0.381	CTX	ATP6V1F	CTX	Human	0.0117404	23
9.78602e-09	0.268129	0.175	0.13	CTX	RAD23B	CTX	Human	0.0102748	23
9.20316e-07	0.250782	0.147	0.104	CTX	ALDH2	CTX	Human	0.0130014	23
4.95583e-11	0.295248	0.107	0.053	CTX	ROGDI	CTX	Human	0.00313517	22
1.30453e-07	0.262113	0.154	0.099	CTX	MSANTD3	CTX	Human	0.00799636	22
8.26572e-08	0.261101	0.237	0.185	CTX	PSMD3	CTX	Human	0.0119265	22
4.23081e-10	0.260828	0.322	0.26	CTX	APLP1	CTX	Human	0.00527219	22
1.63684e-06	0.257735	0.332	0.276	CTX	CCDC90B	CTX	Human	0.00905444	22
5.46406e-07	0.257572	0.163	0.114	CTX	TULP4	CTX	Human	0.0128657	22
3.3529e-06	0.255223	0.322	0.269	CTX	NDUFV2	CTX	Human	0.0130685	22
1.48191e-07	0.248463	0.108	0.063	CTX	RUNDC3A	CTX	Human	0.0107307	22
1.39144e-07	0.269222	0.106	0.052	CTX	L1CAM	CTX	Human	0.00823364	21
1.84127e-07	0.26921	0.202	0.14	CTX	DPYSL5	CTX	Human	0.0117527	21
5.47918e-09	0.267033	0.152	0.106	CTX	EEF1E1	CTX	Human	0.0114687	21
1.00933e-07	0.265675	0.391	0.332	CTX	TNRC6B	CTX	Human	0.00683616	21
1.24062e-06	0.264665	0.155	0.108	CTX	CLPP	CTX	Human	0.012702	21
2.43923e-09	0.261113	0.311	0.242	CTX	TMCO1	CTX	Human	0.0106659	21
1.30957e-07	0.258053	0.164	0.11	CTX	AKIRIN1	CTX	Human	0.0126952	21
3.30072e-08	0.249943	0.259	0.198	CTX	G3BP2	CTX	Human	0.00784166	21
8.64934e-07	0.248891	0.299	0.244	CTX	SNRNP70	CTX	Human	0.013807	21
2.11321e-07	0.246367	0.408	0.345	CTX	HMGB3	CTX	Human	0.00821545	21
6.80427e-09	0.348438	0.1	0.058	CTX	TMEM178B	CTX	Human	0.00861181	20
6.23658e-08	0.268187	0.237	0.184	CTX	VCP	CTX	Human	0.0109329	20
4.17059e-12	0.267708	0.26	0.189	CTX	SRGAP3	CTX	Human	0.00854898	20
1.08648e-09	0.258342	0.1	0.057	CTX	SENP5	CTX	Human	0.00393851	20
5.56507e-07	0.25829	0.164	0.122	CTX	ACVR1	CTX	Human	0.0101089	20
1.1118e-06	0.257968	0.35	0.289	CTX	PJA2	CTX	Human	0.0135478	20
6.42107e-09	0.257825	0.175	0.119	CTX	EZH2	CTX	Human	0.00978376	20
7.01886e-08	0.247447	0.104	0.061	CTX	SMIM18	CTX	Human	0.00976659	20
6.35047e-07	0.245674	0.13	0.082	CTX	PRKRIP1	CTX	Human	0.0166677	20
5.4726e-08	0.282129	0.184	0.132	CTX	WASF1	CTX	Human	0.00895704	19
3.91914e-10	0.277411	0.102	0.054	CTX	TRAP1	CTX	Human	0.00754166	19
6.62269e-08	0.273675	0.252	0.189	CTX	PDS5B	CTX	Human	0.00896451	19
2.04368e-07	0.271764	0.139	0.091	CTX	TMEM147	CTX	Human	0.00944426	19
1.60425e-07	0.260606	0.36	0.293	CTX	JAKMIP2	CTX	Human	0.0064285	19
2.02153e-08	0.256124	0.11	0.069	CTX	GABRB3	CTX	Human	0.00962468	19
9.35582e-08	0.253008	0.232	0.172	CTX	NDUFV1	CTX	Human	0.0125337	19
8.64206e-07	0.263732	0.198	0.147	CTX	FAM229B	CTX	Human	0.00906333	18
1.47179e-07	0.252405	0.112	0.069	CTX	LENG8	CTX	Human	0.00665008	18
3.09004e-07	0.249508	0.411	0.34	CTX	APC	CTX	Human	0.00847229	18
4.4373e-07	0.23971	0.467	0.408	CTX	CFDP1	CTX	Human	0.0138572	18
4.53833e-07	0.272793	0.101	0.057	CTX	POP5	CTX	Human	0.00157434	17
8.63431e-08	0.257894	0.153	0.096	CTX	GNL3	CTX	Human	0.0110433	17
4.04213e-08	0.255828	0.34	0.275	CTX	DDX18	CTX	Human	0.00777537	17
7.33519e-08	0.250893	0.116	0.071	CTX	SLC22A17	CTX	Human	0.00786339	17
1.4586e-08	0.25068	0.158	0.11	CTX	NMT1	CTX	Human	0.00712729	17
3.74654e-07	0.279261	0.1	0.059	CTX	ZNF639	CTX	Human	0.00105622	16
1.82602e-07	0.278784	0.222	0.174	CTX	TSC22D3	CTX	Human	0.00945257	16
2.69752e-06	0.262355	0.298	0.243	CTX	DYNC1LI1	CTX	Human	0.0137109	16
[truncated: 1,837 more rows]
