# Supplementary material for: Cortical arealization of interneurons defines shared and distinct molecular programs in developing human and macaque brains
Source: Research Square preprint supplement (doi:10.21203/rs.3.rs-3939272/v1), 2024-02-26
Supplement: Supplementary file 5 [file 63b45d99edb1cae01545d486.xlsx]

## Sheet: Human_FC.vs.MSC
Table S10. Shared and unique regional and species DEGs for MEIS2 PAX6 SCGN cells.
p_val	avg_log2FC	pct.1	pct.2	p_val_adj	cluster	gene
1.35415e-11	1.09047	0.307	0.16	1.92262e-07	FC	DNAJB1
6.4074e-11	0.387117	0.864	0.865	9.09722e-07	FC	CALM2
1.33545e-10	0.827222	0.497	0.319	1.89607e-06	FC	FOS
1.00129e-09	0.456132	0.942	0.901	1.42164e-05	FC	NNAT
1.83654e-08	0.30728	0.942	0.936	0.000260751	FC	MLLT11
4.29738e-08	0.619612	0.412	0.312	0.000610142	FC	IER2
6.0009e-08	0.839133	0.406	0.283	0.000852007	FC	ARRDC3
2.28672e-07	0.460284	0.506	0.429	0.00324669	FC	SRSF5
4.80674e-07	0.460394	0.119	0.064	0.00682461	FC	TOB1
5.51822e-07	0.290217	0.845	0.817	0.00783477	FC	SLC25A6
5.53561e-07	0.371926	0.736	0.697	0.00785945	FC	MORF4L1
5.85638e-07	0.349133	0.751	0.74	0.00831489	FC	DNAJB6
6.49036e-07	0.673703	0.199	0.098	0.00921502	FC	EGR1
6.73181e-71	1.31224	0.931	0.493	9.55782e-67	MSC	BASP1
5.41824e-35	0.885679	0.841	0.484	7.69282e-31	MSC	PTMS
2.654e-32	0.951544	0.601	0.264	3.76815e-28	MSC	MZT2B
3.82307e-30	0.616624	0.957	0.791	5.42799e-26	MSC	CCNI
1.74416e-26	0.972343	0.476	0.184	2.47636e-22	MSC	SP9
3.44589e-25	0.731382	0.691	0.396	4.89248e-21	MSC	KHDRBS1
3.33484e-24	1.02164	0.335	0.091	4.7348e-20	MSC	BRI3
7.82501e-23	0.862948	0.294	0.082	1.11099e-18	MSC	SRM
1.60392e-22	0.62508	0.743	0.43	2.27725e-18	MSC	RAC1
6.5546e-22	1.09038	0.482	0.172	9.30622e-18	MSC	PPP1R14B
1.18481e-21	0.887446	0.376	0.13	1.6822e-17	MSC	NLRP1
3.1849e-21	0.354928	1	0.999	4.52193e-17	MSC	TUBA1A
4.19684e-21	0.293725	1	1	5.95867e-17	MSC	EEF1A1
2.53916e-20	0.852604	0.503	0.221	3.6051e-16	MSC	PTOV1
1.44945e-19	0.937983	0.245	0.052	2.05793e-15	MSC	RNF187
1.86815e-19	0.826341	0.53	0.252	2.6524e-15	MSC	DCLK2
1.47473e-18	0.502042	0.977	0.866	2.09382e-14	MSC	TPT1
1.86791e-18	0.636919	0.435	0.221	2.65205e-14	MSC	SRSF9
2.58512e-18	0.853666	0.337	0.106	3.67035e-14	MSC	YPEL3
3.66572e-18	1.06063	0.296	0.082	5.20459e-14	MSC	ID4
6.21819e-18	0.657793	0.867	0.639	8.82859e-14	MSC	MARCKS
3.60631e-17	0.643401	0.692	0.445	5.12023e-13	MSC	PNRC1
4.18805e-17	0.694366	0.475	0.231	5.94619e-13	MSC	GADD45G
9.04603e-17	0.747945	0.588	0.309	1.28436e-12	MSC	TOX3
1.46906e-16	0.636869	0.666	0.403	2.08577e-12	MSC	SFPQ
2.71643e-16	0.711301	0.205	0.057	3.85679e-12	MSC	GLRX5
4.3197e-16	0.785016	0.202	0.042	6.13312e-12	MSC	SFRP1
9.29102e-16	0.712186	0.501	0.276	1.31914e-11	MSC	CAMK2N1
8.99151e-15	0.712321	0.281	0.107	1.27661e-10	MSC	EFNB2
9.84968e-15	0.790125	0.212	0.054	1.39846e-10	MSC	HRAS
2.10991e-14	0.759137	0.272	0.094	2.99565e-10	MSC	IGFBP2
2.26709e-14	0.255146	0.998	0.979	3.21882e-10	MSC	STMN2
2.44508e-14	0.638166	0.366	0.185	3.47152e-10	MSC	SLAIN1
8.38875e-14	0.72685	0.373	0.164	1.19103e-09	MSC	MXI1
1.12626e-13	0.731233	0.213	0.06	1.59906e-09	MSC	PDCD7
2.8166e-13	0.298113	0.998	0.973	3.99901e-09	MSC	TUBB2B
2.98936e-13	0.503411	0.155	0.049	4.24429e-09	MSC	DEAF1
5.45488e-13	0.335743	0.973	0.922	7.74484e-09	MSC	BTG1
5.53672e-13	0.298316	0.996	0.975	7.86104e-09	MSC	ACTG1
8.0894e-13	0.595306	0.202	0.082	1.14853e-08	MSC	FAM107B
1.22935e-12	0.767535	0.365	0.175	1.74543e-08	MSC	ARL4C
1.27839e-12	0.638065	0.252	0.1	1.81506e-08	MSC	PTP4A2
5.1898e-12	0.659512	0.223	0.073	7.36848e-08	MSC	ENHO
6.17349e-12	0.587348	0.486	0.264	8.76513e-08	MSC	JUND
6.32928e-12	0.66481	0.261	0.103	8.98632e-08	MSC	CHD3
6.83304e-12	0.679686	0.193	0.057	9.70155e-08	MSC	URI1
6.9465e-12	0.648182	0.301	0.118	9.86263e-08	MSC	KDM1A
2.01668e-11	0.528778	0.141	0.039	2.86328e-07	MSC	FAM50A
3.2328e-11	0.656901	0.243	0.087	4.58992e-07	MSC	PALM
5.53963e-11	0.326494	0.981	0.921	7.86516e-07	MSC	NACA
7.21451e-11	0.485051	0.13	0.037	1.02432e-06	MSC	RCOR2
9.29658e-11	0.446283	0.222	0.099	1.31993e-06	MSC	GOLM1
1.01997e-10	0.546415	0.388	0.199	1.44815e-06	MSC	TOP2B
1.21782e-10	0.654819	0.202	0.07	1.72906e-06	MSC	CTXN1
1.86536e-10	0.62126	0.358	0.175	2.64844e-06	MSC	EVL
2.1013e-10	0.660084	0.154	0.034	2.98342e-06	MSC	SIAH2
4.03283e-10	0.523186	0.176	0.061	5.72581e-06	MSC	CNTFR
5.01139e-10	0.480996	0.14	0.043	7.11517e-06	MSC	TMEM203
5.21405e-10	0.543747	0.21	0.081	7.40291e-06	MSC	KCNQ2
5.40293e-10	0.544262	0.334	0.163	7.67107e-06	MSC	CPE
5.73573e-10	0.46964	0.182	0.076	8.14359e-06	MSC	YPEL1
6.02176e-10	0.647271	0.219	0.076	8.54969e-06	MSC	FJX1
6.89241e-10	0.456455	0.676	0.449	9.78584e-06	MSC	SET
1.17572e-09	0.676622	0.291	0.139	1.66929e-05	MSC	GNAI2
1.29494e-09	0.420717	0.441	0.27	1.83856e-05	MSC	YWHAH
1.43563e-09	0.492842	0.725	0.525	2.0383e-05	MSC	SOX2
1.48915e-09	0.492968	0.111	0.027	2.1143e-05	MSC	RNF169
1.62218e-09	0.28883	0.401	0.257	2.30317e-05	MSC	SIAH1
2.9003e-09	0.378832	0.377	0.225	4.11785e-05	MSC	CSNK2B
3.20425e-09	0.598737	0.172	0.055	4.5494e-05	MSC	MAP2K2
3.78386e-09	0.52568	0.113	0.027	5.37233e-05	MSC	CXXC5
1.27031e-08	0.69396	0.211	0.073	0.000180359	MSC	NETO2
1.49833e-08	0.578286	0.178	0.064	0.000212733	MSC	CD81
1.56438e-08	0.37008	0.197	0.097	0.000222111	MSC	AKAP8L
1.70741e-08	0.383391	0.175	0.076	0.000242418	MSC	RALBP1
1.87686e-08	0.512505	0.119	0.03	0.000266477	MSC	TSR3
1.97884e-08	0.288486	0.487	0.33	0.000280956	MSC	PSIP1
2.72544e-08	0.407505	0.564	0.376	0.000386958	MSC	MGST3
3.22659e-08	0.442875	0.181	0.081	0.000458112	MSC	CUL3
3.73041e-08	0.671026	0.31	0.139	0.000529644	MSC	ODC1
3.89496e-08	0.4993	0.248	0.109	0.000553007	MSC	UBE2S
6.52273e-08	0.570604	0.176	0.058	0.000926097	MSC	MAP7D1
7.02329e-08	0.484979	0.14	0.046	0.000997167	MSC	PPP3CB
1.36074e-07	0.250734	0.999	0.996	0.00193198	MSC	SOX4
2.41444e-07	0.399472	0.469	0.316	0.00342803	MSC	SCG3
2.83083e-07	0.520139	0.198	0.069	0.00401921	MSC	CTCF
2.90448e-07	0.418323	0.152	0.057	0.00412378	MSC	NENF
4.23123e-07	0.433592	0.116	0.042	0.0060075	MSC	TUSC1
4.61685e-07	0.47664	0.156	0.06	0.00655501	MSC	BRD7
4.75519e-07	0.388447	0.333	0.201	0.00675142	MSC	NDUFB1
5.39906e-07	0.476886	0.195	0.085	0.00766558	MSC	GSPT1
5.47452e-07	0.446715	0.114	0.042	0.00777272	MSC	FAM171A2
5.77428e-07	0.323597	0.101	0.037	0.00819832	MSC	MRGBP
6.9621e-07	0.396418	0.186	0.101	0.00988479	MSC	MEIS3

## Sheet: Macaque_FC.vs.MSC
Table S10. Shared and unique regional and species DEGs for MEIS2 PAX6 SCGN cells.
p_val	avg_log2FC	pct.1	pct.2	p_val_adj	cluster	gene
4.29799e-46	1.30446	0.792	0.384	6.10228e-42	FC	UBB
1.00921e-37	1.31404	0.698	0.272	1.43287e-33	FC	EEF1G
1.11566e-31	0.493222	0.996	0.986	1.58401e-27	FC	STMN1
7.22539e-24	0.865789	0.813	0.615	1.02586e-19	FC	PTMA
2.1367e-21	0.732259	0.865	0.818	3.03368e-17	FC	BTG1
2.84716e-21	0.571613	0.854	0.732	4.04239e-17	FC	FAU
1.31466e-19	0.689783	0.848	0.724	1.86656e-15	FC	SOX2
2.67064e-17	1.05351	0.375	0.152	3.79177e-13	FC	TUBA1B
2.85634e-17	1.06471	0.434	0.28	4.05543e-13	FC	NNAT
3.73266e-17	0.696133	0.683	0.625	5.29963e-13	FC	CALM2
4.95198e-16	0.958231	0.325	0.153	7.03082e-12	FC	RNASEK
1.64913e-15	0.836931	0.592	0.43	2.34143e-11	FC	YBX1
1.46222e-14	0.640111	0.806	0.535	2.07606e-10	FC	FABP7
5.57782e-14	0.559126	0.528	0.476	7.91938e-10	FC	OAZ1
5.59092e-14	0.592334	0.766	0.679	7.93799e-10	FC	MEIS2
1.01873e-13	0.576531	0.915	0.807	1.44639e-09	FC	UBA52
1.35669e-13	0.946984	0.383	0.182	1.92623e-09	FC	WDR83OS
1.43417e-12	0.666427	0.612	0.478	2.03623e-08	FC	GAPDH
1.53489e-12	0.843247	0.166	0.059	2.17924e-08	FC	GNG10
6.31613e-12	0.699158	0.541	0.403	8.96764e-08	FC	COX4I1
4.94446e-11	0.875706	0.285	0.122	7.02015e-07	FC	NME2
7.1308e-11	0.971571	0.332	0.152	1.01243e-06	FC	EIF4A1
1.94658e-10	0.505116	0.594	0.498	2.76375e-06	FC	FTL
1.95807e-10	0.726391	0.482	0.353	2.78007e-06	FC	ETV1
2.65663e-10	0.764424	0.251	0.118	3.77189e-06	FC	PCDHAC2
2.97727e-10	0.857502	0.27	0.116	4.22712e-06	FC	TMEFF1
5.44025e-10	0.544523	0.618	0.51	7.72406e-06	FC	PFDN5
6.06676e-10	0.825651	0.215	0.09	8.61358e-06	FC	PCBP1
9.72732e-10	0.807825	0.244	0.12	1.38109e-05	FC	HYPK
9.99377e-09	0.498668	0.698	0.68	0.000141891	FC	MARCKSL1
1.09872e-08	0.843245	0.268	0.143	0.000155996	FC	PTN
4.02702e-08	0.824408	0.138	0.043	0.000571757	FC	PTP4A1
5.68375e-08	0.824236	0.26	0.116	0.000806978	FC	ATP6V0C
7.78665e-08	0.798127	0.44	0.322	0.00110555	FC	HNRNPA1
1.11756e-07	0.664587	0.15	0.063	0.00158671	FC	COMMD3
1.30686e-07	0.86065	0.247	0.11	0.00185548	FC	NGRN
3.39895e-07	0.943091	0.25	0.099	0.00482583	FC	LAMP3
4.11145e-07	0.72492	0.416	0.312	0.00583744	FC	PAIP2
4.19791e-07	0.954801	0.128	0.03	0.0059602	FC	APOE
5.5211e-07	0.935847	0.138	0.048	0.00783886	FC	GNS
5.62736e-07	0.611601	0.176	0.092	0.00798973	FC	MZT2B
6.2361e-07	0.828436	0.306	0.145	0.00885402	FC	U2AF1
4.14581e-64	2.16593	0.493	0.055	5.88622e-60	MSC	SLC25A6
9.15748e-50	1.37674	0.826	0.534	1.30018e-45	MSC	FOXG1
6.37816e-34	1.63815	0.37	0.049	9.0557e-30	MSC	CHCHD2
3.26956e-32	1.39453	0.226	0.023	4.64212e-28	MSC	MGRN1
5.79469e-31	1.37495	0.528	0.197	8.2273e-27	MSC	BCL11A
6.21771e-29	1.3129	0.592	0.309	8.82791e-25	MSC	EEF1A1
5.09837e-27	0.951489	0.33	0.096	7.23867e-23	MSC	PEBP1
7.62637e-27	1.27993	0.22	0.022	1.08279e-22	MSC	TIMM8B
3.8642e-26	1.11243	0.366	0.117	5.48639e-22	MSC	DLX6
1.16676e-25	1.48502	0.342	0.065	1.65656e-21	MSC	IGF1R
1.11261e-24	0.920655	0.233	0.062	1.57968e-20	MSC	TCF3
1.54773e-24	0.916665	0.753	0.499	2.19747e-20	MSC	NFIA
9.07141e-24	0.916934	0.385	0.145	1.28796e-19	MSC	GATAD2B
9.09796e-23	0.706371	0.851	0.634	1.29173e-18	MSC	CCDC88A
1.14179e-22	0.954805	0.461	0.179	1.62111e-18	MSC	CAMK2N1
1.68197e-22	0.910146	0.722	0.439	2.38806e-18	MSC	ZEB2
2.85293e-22	1.35787	0.255	0.032	4.05059e-18	MSC	COX7C
3.00044e-22	1.15942	0.203	0.025	4.26003e-18	MSC	NOVA2
8.01692e-22	0.84581	0.32	0.114	1.13824e-17	MSC	BNIP3L
9.43016e-22	1.10577	0.578	0.262	1.33889e-17	MSC	ELAVL3
1.55547e-21	0.742248	0.621	0.349	2.20846e-17	MSC	MAP4K4
1.05779e-20	1.12254	0.39	0.131	1.50185e-16	MSC	ATP6V1G1
1.33648e-20	1.02902	0.222	0.047	1.89754e-16	MSC	PPIA
1.09797e-19	0.997245	0.542	0.251	1.5589e-15	MSC	ARID1B
1.34881e-19	1.25565	0.243	0.047	1.91505e-15	MSC	ITGB8
3.68782e-19	0.979427	0.255	0.074	5.23596e-15	MSC	NPAS1
5.54048e-19	1.12697	0.452	0.161	7.86637e-15	MSC	NR2F1
6.72821e-19	1.15926	0.296	0.075	9.55271e-15	MSC	ST8SIA2
2.18716e-18	0.909206	0.346	0.125	3.10533e-14	MSC	KANSL1
2.51193e-18	0.96599	0.209	0.047	3.56644e-14	MSC	GLG1
6.16494e-18	0.723421	0.833	0.605	8.75298e-14	MSC	HNRNPDL
2.37573e-17	0.811375	0.428	0.191	3.37307e-13	MSC	DNAJB6
2.73173e-17	0.886538	0.27	0.085	3.87852e-13	MSC	TMEM123
3.24755e-17	1.03321	0.307	0.091	4.61087e-13	MSC	RC3H1
8.85594e-17	0.523377	0.512	0.31	1.25737e-12	MSC	FUS
1.09482e-16	0.932828	0.446	0.205	1.55443e-12	MSC	ERBB4
1.49522e-16	1.06166	0.274	0.07	2.12292e-12	MSC	SLC38A2
3.33458e-16	0.842732	0.312	0.122	4.73443e-12	MSC	SRGAP1
3.59662e-16	1.02558	0.24	0.054	5.10648e-12	MSC	ST8SIA5
4.97618e-16	0.462724	0.903	0.746	7.06518e-12	MSC	DCX
6.98805e-16	0.549886	0.614	0.388	9.92164e-12	MSC	SH3BGRL3
8.32318e-16	0.855567	0.135	0.019	1.18173e-11	MSC	KPNA6
1.92158e-15	0.789137	0.48	0.244	2.72826e-11	MSC	CHD7
1.99484e-15	0.707083	0.124	0.024	2.83228e-11	MSC	TTL
3.68174e-15	0.536459	0.621	0.36	5.22733e-11	MSC	JUND
6.4426e-15	0.92241	0.268	0.077	9.14721e-11	MSC	SUMO1
8.03564e-15	0.72062	0.106	0.012	1.1409e-10	MSC	SAMD4B
1.18371e-14	0.841018	0.293	0.107	1.68063e-10	MSC	KALRN
1.1911e-14	1.11381	0.213	0.035	1.69112e-10	MSC	SLC35E2B
1.54996e-14	0.734571	0.248	0.102	2.20064e-10	MSC	SLITRK1
2.26648e-14	0.946215	0.2	0.04	3.21795e-10	MSC	MDM2
2.27461e-14	0.746512	0.226	0.074	3.22949e-10	MSC	FZD3
5.33199e-14	0.855581	0.358	0.147	7.57036e-10	MSC	SOGA1
7.18029e-14	0.668735	0.722	0.503	1.01946e-09	MSC	KAT6B
7.55237e-14	0.821154	0.361	0.143	1.07229e-09	MSC	BRD4
7.91837e-14	0.491607	0.152	0.059	1.12425e-09	MSC	NOL4L
8.50737e-14	0.776136	0.274	0.096	1.20788e-09	MSC	MAP1LC3B
9.81355e-14	0.66125	0.672	0.408	1.39333e-09	MSC	SFPQ
1.13654e-13	0.745836	0.248	0.09	1.61365e-09	MSC	MDM4
1.18671e-13	0.53648	0.568	0.378	1.68489e-09	MSC	MEX3A
2.58331e-13	0.65273	0.344	0.168	3.66778e-09	MSC	SPTBN1
2.63047e-13	0.668871	0.111	0.019	3.73474e-09	MSC	ISOC1
2.68739e-13	0.700628	0.174	0.05	3.81556e-09	MSC	TSC1
3.52513e-13	0.764823	0.251	0.091	5.00498e-09	MSC	KIAA1549
4.08565e-13	0.618126	0.547	0.315	5.80081e-09	MSC	NRXN1
5.20132e-13	0.464989	0.859	0.688	7.38483e-09	MSC	ZNF704
5.30094e-13	0.839851	0.215	0.062	7.52627e-09	MSC	ZKSCAN8
7.33985e-13	0.846956	0.171	0.033	1.04211e-08	MSC	CACNG4
7.46637e-13	0.315405	0.915	0.825	1.06008e-08	MSC	HSP90AA1
7.55563e-13	0.662822	0.51	0.274	1.07275e-08	MSC	DDX6
1.18837e-12	0.56078	0.373	0.196	1.68725e-08	MSC	NAV1
1.28355e-12	0.693028	0.15	0.042	1.82238e-08	MSC	CCSAP
1.36771e-12	0.759935	0.225	0.08	1.94188e-08	MSC	PHACTR4
2.02967e-12	0.654832	0.124	0.027	2.88172e-08	MSC	SCD5
2.08056e-12	0.728764	0.154	0.044	2.95397e-08	MSC	RNF165
2.21391e-12	0.813887	0.131	0.021	3.14331e-08	MSC	CASP2
2.33692e-12	0.833384	0.148	0.03	3.31796e-08	MSC	MNT
2.45591e-12	0.657808	0.219	0.084	3.4869e-08	MSC	UBXN7
2.87133e-12	0.618694	0.268	0.115	4.07671e-08	MSC	ATP9A
2.93339e-12	0.611897	0.39	0.202	4.16482e-08	MSC	SETBP1
3.24795e-12	0.82594	0.123	0.018	4.61144e-08	MSC	CNR1
5.3711e-12	0.868454	0.149	0.024	7.62589e-08	MSC	IRGQ
5.9531e-12	0.695491	0.332	0.15	8.45221e-08	MSC	KDM5A
6.21899e-12	0.585716	0.473	0.262	8.82972e-08	MSC	CIRBP
6.97177e-12	0.742279	0.304	0.131	9.89851e-08	MSC	ID4
7.08586e-12	0.942016	0.18	0.041	1.00605e-07	MSC	STC1
7.34699e-12	0.677469	0.552	0.31	1.04313e-07	MSC	KLF7
8.2633e-12	0.611236	0.345	0.171	1.17322e-07	MSC	KDM5B
8.58557e-12	0.754707	0.136	0.024	1.21898e-07	MSC	CD99
1.1087e-11	0.593015	0.197	0.075	1.57413e-07	MSC	DRAXIN
1.1989e-11	0.628389	0.587	0.348	1.7022e-07	MSC	ARGLU1
1.39435e-11	0.803203	0.198	0.054	1.9797e-07	MSC	DUSP8
1.51194e-11	0.488818	0.286	0.149	2.14666e-07	MSC	HMBOX1
1.78145e-11	0.572047	0.114	0.03	2.5293e-07	MSC	DCTN5
1.98626e-11	0.772382	0.294	0.109	2.8201e-07	MSC	KLF13
2.05366e-11	0.65268	0.263	0.104	2.91579e-07	MSC	GNB1
2.11596e-11	0.652377	0.391	0.203	3.00424e-07	MSC	ANKS1B
2.75698e-11	0.554357	0.354	0.185	3.91437e-07	MSC	RUFY2
2.86408e-11	0.767147	0.424	0.212	4.06642e-07	MSC	GSE1
4.00576e-11	0.990613	0.18	0.032	5.68737e-07	MSC	RAP2B
4.14707e-11	0.683647	0.191	0.062	5.888e-07	MSC	AGO1
4.15702e-11	0.365976	0.172	0.086	5.90213e-07	MSC	DNM1L
4.34477e-11	0.613272	0.482	0.268	6.1687e-07	MSC	TAOK1
4.39981e-11	0.517856	0.341	0.179	6.24685e-07	MSC	BRD9
4.44564e-11	0.482279	0.371	0.198	6.31192e-07	MSC	RBM3
4.91694e-11	0.630075	0.299	0.135	6.98107e-07	MSC	ADNP
5.18962e-11	0.545882	0.146	0.046	7.36822e-07	MSC	MED23
5.25825e-11	0.467757	0.323	0.178	7.46567e-07	MSC	PPP1R12A
6.40839e-11	0.43043	0.276	0.154	9.09863e-07	MSC	TNKS
6.48413e-11	0.726927	0.203	0.069	9.20617e-07	MSC	POLR2A
7.24625e-11	0.646497	0.395	0.196	1.02882e-06	MSC	DDX24
7.97686e-11	0.637883	0.192	0.07	1.13255e-06	MSC	ADARB2
9.06793e-11	0.712207	0.113	0.018	1.28746e-06	MSC	SOX9
9.80706e-11	0.801932	0.13	0.016	1.39241e-06	MSC	FUNDC2
1.11747e-10	0.645944	0.169	0.059	1.58659e-06	MSC	NFIC
1.13614e-10	0.569091	0.112	0.026	1.61309e-06	MSC	ST8SIA4
1.16114e-10	0.733612	0.158	0.04	1.64858e-06	MSC	RBM15B
1.18037e-10	0.697249	0.275	0.114	1.67589e-06	MSC	TPM4
1.23421e-10	0.645936	0.218	0.086	1.75233e-06	MSC	SMAD4
1.2541e-10	0.487717	0.164	0.07	1.78057e-06	MSC	KLF3
1.34762e-10	0.530372	0.102	0.027	1.91335e-06	MSC	OTULIN
1.41397e-10	0.750085	0.196	0.064	2.00755e-06	MSC	SLC1A2
1.95993e-10	0.611235	0.441	0.245	2.78271e-06	MSC	CCDC50
2.00964e-10	0.340594	0.486	0.317	2.85329e-06	MSC	EPC1
2.44202e-10	0.332723	0.542	0.372	3.46719e-06	MSC	RSF1
2.6365e-10	0.699904	0.281	0.114	3.74331e-06	MSC	R3HDM2
3.51957e-10	0.680661	0.261	0.104	4.99709e-06	MSC	PCBP2
3.84051e-10	0.538954	0.126	0.038	5.45275e-06	MSC	THRB
4.57103e-10	0.521545	0.363	0.192	6.48994e-06	MSC	ARID1A
5.04385e-10	0.622582	0.192	0.073	7.16125e-06	MSC	PRR36
5.11641e-10	0.330612	0.444	0.29	7.26427e-06	MSC	RAB14
5.41975e-10	0.650443	0.274	0.118	7.69496e-06	MSC	MYEF2
5.96876e-10	0.539047	0.412	0.233	8.47445e-06	MSC	EFNB2
6.39765e-10	0.718328	0.3	0.132	9.08339e-06	MSC	CDV3
6.8026e-10	0.646415	0.196	0.073	9.65833e-06	MSC	MBD5
7.54309e-10	0.745169	0.403	0.189	1.07097e-05	MSC	WSB1
7.55832e-10	0.697421	0.421	0.216	1.07313e-05	MSC	SLC10A4
8.4101e-10	0.556279	0.298	0.148	1.19407e-05	MSC	MAPK10
9.85389e-10	0.33464	0.493	0.327	1.39906e-05	MSC	HNRNPD
1.01547e-09	0.528101	0.12	0.04	1.44176e-05	MSC	MYO18A
1.03131e-09	0.432019	0.147	0.06	1.46425e-05	MSC	MSI1
1.12325e-09	0.609683	0.481	0.279	1.5948e-05	MSC	ARL4C
1.13711e-09	0.433072	0.267	0.148	1.61447e-05	MSC	TMPO
1.16346e-09	0.655258	0.673	0.412	1.65188e-05	MSC	SRRM2
1.20992e-09	0.513423	0.154	0.058	1.71785e-05	MSC	NCOR2
1.32767e-09	0.744827	0.287	0.118	1.88502e-05	MSC	TSC22D2
1.34248e-09	1.36367	0.162	0.054	1.90605e-05	MSC	HSPA1A
1.34395e-09	0.795668	0.153	0.044	1.90813e-05	MSC	NR2F2
1.71539e-09	0.332417	0.958	0.883	2.43551e-05	MSC	SOX11
1.74393e-09	0.456893	0.216	0.097	2.47603e-05	MSC	ANP32A
2.08098e-09	0.510824	0.141	0.05	2.95458e-05	MSC	SNX27
2.08931e-09	0.635816	0.321	0.148	2.9664e-05	MSC	CASK
2.11056e-09	0.413395	0.222	0.114	2.99657e-05	MSC	KIF5A
2.23059e-09	0.304387	0.482	0.336	3.167e-05	MSC	BPTF
2.28166e-09	0.56996	0.39	0.218	3.2395e-05	MSC	ANKRD11
2.49851e-09	0.727007	0.272	0.101	3.54738e-05	MSC	YTHDF2
2.75586e-09	0.628677	0.298	0.132	3.91277e-05	MSC	SERINC1
3.04229e-09	0.511975	0.144	0.049	4.31944e-05	MSC	FBXL20
3.2148e-09	0.639754	0.199	0.074	4.56437e-05	MSC	EPM2AIP1
4.15907e-09	0.453879	0.232	0.114	5.90505e-05	MSC	KIF21A
4.2232e-09	0.347372	0.552	0.383	5.9961e-05	MSC	HP1BP3
4.40298e-09	0.332499	0.966	0.91	6.25136e-05	MSC	MAP1B
4.43271e-09	0.696084	0.184	0.058	6.29357e-05	MSC	PAICS
4.49552e-09	0.535616	0.411	0.219	6.38274e-05	MSC	GNAI2
5.14689e-09	0.502136	0.216	0.096	7.30756e-05	MSC	TRIM13
5.50459e-09	0.557855	0.265	0.12	7.81542e-05	MSC	TBCA
5.78069e-09	0.453686	0.557	0.367	8.20742e-05	MSC	TOX3
6.5166e-09	0.495599	0.166	0.066	9.25227e-05	MSC	ADD2
6.85851e-09	0.63534	0.399	0.209	9.73771e-05	MSC	DHX36
6.99308e-09	0.598624	0.138	0.046	9.92878e-05	MSC	CACNA1E
7.62391e-09	0.516766	0.274	0.135	0.000108244	MSC	TNRC6A
7.92448e-09	0.435171	0.203	0.097	0.000112512	MSC	ZNF445
9.32269e-09	0.565486	0.296	0.147	0.000132364	MSC	AMER2
9.6297e-09	0.332613	0.542	0.37	0.000136722	MSC	RSRC2
9.65839e-09	0.597653	0.419	0.228	0.00013713	MSC	SMARCD1
1.13938e-08	0.441458	0.552	0.358	0.000161769	MSC	PAK2
1.17508e-08	0.453104	0.587	0.399	0.000166838	MSC	RERE
1.28032e-08	0.603429	0.223	0.09	0.00018178	MSC	ETNK1
1.33148e-08	0.459468	0.151	0.061	0.000189044	MSC	PRPF38A
1.40849e-08	0.640574	0.109	0.019	0.000199977	MSC	BCR
1.41056e-08	0.419798	0.103	0.035	0.000200271	MSC	HSPA13
1.5118e-08	0.497906	0.127	0.044	0.000214646	MSC	PPM1L
1.5522e-08	0.615749	0.211	0.08	0.000220382	MSC	DLGAP1
1.57031e-08	0.488074	0.143	0.053	0.000222952	MSC	FAF2
1.60352e-08	0.62011	0.123	0.026	0.000227667	MSC	MPC1
1.81011e-08	0.471627	0.609	0.425	0.000257	MSC	PFN2
1.83127e-08	0.431125	0.182	0.088	0.000260003	MSC	GNPTAB
1.95636e-08	0.367958	0.301	0.181	0.000277764	MSC	SBK1
1.96063e-08	0.658689	0.279	0.118	0.000278371	MSC	RNF24
2.0049e-08	0.640962	0.273	0.115	0.000284656	MSC	RBM5
2.01319e-08	0.565265	0.206	0.089	0.000285833	MSC	VANGL2
2.1126e-08	0.45446	0.298	0.161	0.000299947	MSC	RHOBTB3
2.2019e-08	0.359062	0.198	0.099	0.000312626	MSC	BCL7C
2.23382e-08	0.502023	0.216	0.098	0.000317158	MSC	BRD1
2.27803e-08	0.482465	0.408	0.244	0.000323435	MSC	CHD3
2.40456e-08	0.547915	0.306	0.145	0.000341399	MSC	ZNF207
2.80045e-08	0.563095	0.139	0.041	0.000397608	MSC	PTBP1
2.8782e-08	0.606728	0.101	0.018	0.000408647	MSC	MLLT1
2.98817e-08	0.457482	0.385	0.222	0.00042426	MSC	GNAO1
3.12688e-08	0.626128	0.243	0.106	0.000443954	MSC	SCN3B
3.15682e-08	0.530699	0.269	0.13	0.000448205	MSC	PSMD11
3.4908e-08	0.764603	0.252	0.089	0.000495624	MSC	EP300
3.51059e-08	0.553862	0.586	0.369	0.000498433	MSC	TRA2B
3.60191e-08	0.339614	0.196	0.102	0.000511399	MSC	GPR161
3.6456e-08	0.432286	0.246	0.125	0.000517602	MSC	ENHO
3.70685e-08	0.505014	0.181	0.077	0.000526298	MSC	ZBTB44
3.81911e-08	0.535155	0.151	0.055	0.000542237	MSC	BRAF
4.04434e-08	0.451962	0.137	0.055	0.000574215	MSC	RRP1B
4.05156e-08	0.398467	0.373	0.225	0.000575241	MSC	MN1
4.2208e-08	0.485185	0.278	0.144	0.000599269	MSC	FNBP4
4.24001e-08	0.478546	0.204	0.092	0.000601997	MSC	SMNDC1
4.39173e-08	0.569279	0.206	0.09	0.000623538	MSC	PELI2
4.5055e-08	0.673603	0.141	0.035	0.000639691	MSC	OPHN1
4.71269e-08	0.578971	0.442	0.237	0.000669107	MSC	KIF5C
4.88905e-08	0.352859	0.18	0.093	0.000694147	MSC	SCAPER
6.00583e-08	0.58074	0.373	0.211	0.000852708	MSC	FLRT2
6.05609e-08	0.512573	0.163	0.069	0.000859844	MSC	TNIK
6.35418e-08	0.425235	0.575	0.377	0.000902166	MSC	RBM39
6.65033e-08	0.380334	0.121	0.047	0.000944214	MSC	ZFPM1
6.94477e-08	0.389559	0.332	0.193	0.000986019	MSC	CBX3
7.00656e-08	0.530398	0.264	0.131	0.000994791	MSC	CAMK4
7.40897e-08	0.329251	0.113	0.05	0.00105193	MSC	KCMF1
7.45784e-08	0.547907	0.104	0.023	0.00105886	MSC	FBLIM1
7.50295e-08	0.640284	0.346	0.173	0.00106527	MSC	CADM1
7.5509e-08	0.45751	0.608	0.358	0.00107208	MSC	PPP1R14B
8.1121e-08	0.447975	0.942	0.835	0.00115176	MSC	TCF4
8.1667e-08	0.354975	0.265	0.151	0.00115951	MSC	RALA
8.388e-08	0.606433	0.318	0.15	0.00119093	MSC	ENAH
9.01902e-08	0.366256	0.123	0.052	0.00128052	MSC	KIAA1328
9.4208e-08	0.289068	0.246	0.147	0.00133757	MSC	BAZ1B
1.00667e-07	0.439805	0.206	0.098	0.00142927	MSC	FBXW11
1.01033e-07	0.224398	0.101	0.05	0.00143447	MSC	MRPL18
1.01552e-07	0.487631	0.224	0.106	0.00144183	MSC	HOOK3
1.10379e-07	0.466624	0.115	0.04	0.00156716	MSC	ZNF652
1.14813e-07	0.568567	0.214	0.094	0.00163011	MSC	DPP6
1.17081e-07	0.352683	0.898	0.703	0.00166232	MSC	BASP1
1.33448e-07	0.232066	0.229	0.143	0.0018947	MSC	KIF3C
1.33869e-07	0.512894	0.234	0.112	0.00190067	MSC	BRWD1
1.44165e-07	0.40387	0.584	0.386	0.00204685	MSC	YWHAG
1.62772e-07	0.45177	0.365	0.203	0.00231104	MSC	CSNK2A1
1.68183e-07	0.559262	0.28	0.133	0.00238786	MSC	ZMIZ1
1.73759e-07	0.413077	0.149	0.066	0.00246702	MSC	ZBTB16
1.81078e-07	0.429546	0.207	0.094	0.00257094	MSC	OLFM1
1.874e-07	0.579523	0.115	0.029	0.0026607	MSC	AGO3
1.8916e-07	0.566269	0.203	0.082	0.00268569	MSC	SPG7
1.90328e-07	0.497999	0.589	0.4	0.00270227	MSC	BCL11B
1.9078e-07	0.425013	0.13	0.047	0.00270869	MSC	UQCRC2
1.92498e-07	0.52458	0.173	0.071	0.00273308	MSC	CBLB
1.95147e-07	0.309084	0.577	0.409	0.00277069	MSC	RTF1
2.14723e-07	0.412117	0.133	0.054	0.00304864	MSC	CNOT6
2.18372e-07	0.5346	0.154	0.056	0.00310044	MSC	SDK2
2.26139e-07	0.462506	0.475	0.296	0.00321073	MSC	DYNC1H1
2.2896e-07	0.514686	0.403	0.218	0.00325078	MSC	BOD1L1
2.50878e-07	0.311223	0.18	0.099	0.00356196	MSC	RAB8B
2.56628e-07	0.421649	0.197	0.098	0.00364361	MSC	USP7
3.11301e-07	0.257927	0.114	0.058	0.00441986	MSC	SH3GLB2
3.22056e-07	0.53202	0.174	0.069	0.00457256	MSC	GABBR1
3.61011e-07	0.332171	0.355	0.222	0.00512563	MSC	MIDN
3.66154e-07	0.319787	0.129	0.061	0.00519865	MSC	GMPS
3.68658e-07	0.404971	0.363	0.212	0.00523421	MSC	SRSF10
3.773e-07	0.390517	0.144	0.069	0.0053569	MSC	RCOR3
4.09085e-07	0.379236	0.177	0.09	0.00580818	MSC	WNK3
4.33328e-07	0.36834	0.381	0.237	0.00615239	MSC	RB1CC1
4.37141e-07	0.432075	0.272	0.146	0.00620652	MSC	FOXO3
4.3913e-07	0.361362	0.182	0.104	0.00623477	MSC	AFF3
4.65114e-07	0.519353	0.385	0.209	0.00660369	MSC	NONO
4.72034e-07	0.573224	0.156	0.056	0.00670193	MSC	DCBLD2
5.02629e-07	0.355446	0.189	0.102	0.00713632	MSC	TSPYL4
5.25397e-07	0.25931	0.311	0.195	0.00745959	MSC	YPEL3
5.51392e-07	0.457415	0.232	0.115	0.00782866	MSC	CUL3
5.64658e-07	0.36594	0.118	0.05	0.00801701	MSC	PTPN1
5.6477e-07	0.565844	0.111	0.028	0.0080186	MSC	PIP5K1B
6.14226e-07	0.482306	0.321	0.175	0.00872079	MSC	AKT3
6.52481e-07	0.442677	0.187	0.092	0.00926392	MSC	TRIM33
6.54078e-07	0.319211	0.152	0.073	0.00928661	MSC	ARPC4
6.69848e-07	0.35028	0.387	0.241	0.0095105	MSC	VEZF1
6.84458e-07	0.341431	0.136	0.065	0.00971793	MSC	ARHGAP33
7.026e-07	0.352375	0.141	0.066	0.00997551	MSC	PLEKHA3

## Sheet: FC_human.vs.macaque
Table S10. Shared and unique regional and species DEGs for MEIS2 PAX6 SCGN cells.
p_val	avg_log2FC	pct.1	pct.2	p_val_adj	cluster	gene
1.78645e-112	3.50724	0.698	0.058	2.53641e-108	Macaque	EEF1G
1.86663e-82	1.99473	0.848	0.525	2.65025e-78	Macaque	SOX2
1.40752e-72	2.96019	0.456	0.003	1.9984e-68	Macaque	MATR3
1.7383e-67	1.57857	0.86	0.639	2.46803e-63	Macaque	MARCKS
3.99731e-67	0.942371	0.996	0.996	5.67538e-63	Macaque	SOX4
4.06936e-56	2.22741	0.523	0.133	5.77768e-52	Macaque	GABARAP
7.08781e-54	1.75336	0.688	0.4	1.00633e-49	Macaque	ZNF704
7.95639e-45	2.06472	0.482	0.175	1.12965e-40	Macaque	ETV1
5.44148e-44	0.978643	0.915	0.87	7.72582e-40	Macaque	UBA52
1.93972e-43	2.9739	0.292	0.007	2.75401e-39	Macaque	PCP4
2.12238e-40	1.83138	0.521	0.221	3.01335e-36	Macaque	SP8
2.99754e-40	2.12032	0.27	0.004	4.25591e-36	Macaque	TMEFF1
1.9173e-38	2.06879	0.26	0.006	2.72218e-34	Macaque	ATP6V0C
6.77247e-38	1.08628	0.835	0.734	9.61555e-34	Macaque	TCF4
7.75772e-38	0.466853	0.996	1	1.10144e-33	Macaque	STMN1
2.09271e-37	1.90155	0.325	0.061	2.97123e-33	Macaque	RNASEK
5.06657e-37	1.92434	0.239	0.01	7.19352e-33	Macaque	IGFBPL1
9.7235e-36	2.10786	0.251	0.004	1.38054e-31	Macaque	PCDHAC2
8.82516e-34	2.04134	0.285	0.025	1.253e-29	Macaque	NME2
7.46671e-33	1.68692	0.466	0.201	1.06012e-28	Macaque	IFI27L2
1.36982e-32	2.1471	0.25	0	1.94486e-28	Macaque	LAMP3
7.46745e-31	1.32915	0.622	0.428	1.06023e-26	Macaque	DDX17
5.72817e-30	1.82601	0.216	0.007	8.13285e-26	Macaque	SLC10A4
3.69685e-29	1.80314	0.244	0.025	5.24879e-25	Macaque	HYPK
4.35377e-28	1.94232	0.306	0.048	6.18148e-24	Macaque	U2AF1
7.59013e-28	1.50102	0.447	0.227	1.07765e-23	Macaque	APP
2.19752e-27	1.53113	0.166	0.003	3.12003e-23	Macaque	GNG10
1.26708e-26	1.11066	0.609	0.466	1.799e-22	Macaque	CEP170
1.598e-26	1.54374	0.187	0.018	2.26885e-22	Macaque	SOGA3
1.80255e-26	0.915255	0.659	0.57	2.55926e-22	Macaque	DLX1
3.55797e-26	1.58996	0.43	0.184	5.0516e-22	Macaque	SP9
9.84247e-26	1.55351	0.447	0.221	1.39743e-21	Macaque	QKI
1.56048e-25	1.34135	0.535	0.345	2.21557e-21	Macaque	AP1S2
2.39642e-25	1.76859	0.375	0.119	3.40244e-21	Macaque	POU3F3
1.06214e-23	1.41735	0.4	0.203	1.50803e-19	Macaque	BCL11B
1.192e-23	1.11344	0.692	0.578	1.6924e-19	Macaque	MAP2
1.1959e-23	1.64767	0.366	0.139	1.69794e-19	Macaque	CHD2
1.67427e-23	1.42163	0.314	0.124	2.37712e-19	Macaque	GSTM3
3.93535e-23	1.20125	0.469	0.301	5.58741e-19	Macaque	CELF4
6.34699e-23	1.18449	0.634	0.466	9.01146e-19	Macaque	CCDC88A
5.694e-22	1.59386	0.26	0.066	8.08434e-18	Macaque	FAM210B
6.12141e-22	1.72371	0.203	0.01	8.69118e-18	Macaque	MRPL53
1.39242e-21	1.51919	0.457	0.252	1.97696e-17	Macaque	DCLK2
2.21521e-21	1.24486	0.499	0.367	3.14516e-17	Macaque	NFIA
8.85618e-21	0.885314	0.703	0.493	1.2574e-16	Macaque	BASP1
4.96637e-20	1.50814	0.171	0.01	7.05126e-16	Macaque	KIAA0408
2.79603e-19	1.2667	0.129	0.004	3.9698e-15	Macaque	FUOM
2.83414e-19	1.42975	0.138	0.006	4.02391e-15	Macaque	GNS
2.99594e-19	1.44524	0.161	0.013	4.25364e-15	Macaque	ACVR1C
7.88963e-19	1.4206	0.33	0.151	1.12017e-14	Macaque	TBL1XR1
1.24578e-18	1.27898	0.133	0.009	1.76875e-14	Macaque	SERF1A
5.59694e-18	1.32365	0.215	0.067	7.94653e-14	Macaque	WRN
7.22325e-18	1.34842	0.343	0.169	1.02556e-13	Macaque	USP22
1.26707e-17	1.19553	0.493	0.336	1.79899e-13	Macaque	INA
2.96413e-17	1.48149	0.186	0.025	4.20847e-13	Macaque	SYT5
3.94179e-17	1.05797	0.121	0.021	5.59655e-13	Macaque	RABL6
4.23342e-17	1.27658	0.322	0.16	6.01061e-13	Macaque	NFIX
4.45185e-17	1.18664	0.36	0.199	6.32073e-13	Macaque	TOP2B
5.49775e-17	1.29247	0.159	0.021	7.80571e-13	Macaque	PAM16
6.83252e-17	1.17879	0.124	0.01	9.70081e-13	Macaque	RBM27
7.86613e-17	1.17101	0.457	0.287	1.11683e-12	Macaque	ROBO2
9.42446e-17	1.08836	0.358	0.172	1.33809e-12	Macaque	PPP1R14B
1.72877e-16	1.43395	0.244	0.078	2.45451e-12	Macaque	NRP2
4.79795e-16	1.467	0.177	0.018	6.81213e-12	Macaque	CDK2AP1
8.66049e-16	0.779415	0.737	0.697	1.22962e-11	Macaque	RTN4
1.33411e-15	1.19374	0.148	0.025	1.89417e-11	Macaque	MRPL35
1.87568e-15	0.649798	0.766	0.751	2.66309e-11	Macaque	MEIS2
4.90198e-15	1.7215	0.116	0.006	6.95983e-11	Macaque	CCK
1.85804e-14	1.19165	0.412	0.257	2.63805e-10	Macaque	SRRM2
2.25343e-14	0.792313	0.705	0.685	3.19942e-10	Macaque	NFIB
3.05256e-14	0.893407	0.62	0.484	4.33402e-10	Macaque	PTMS
3.90953e-14	1.32381	0.211	0.073	5.55075e-10	Macaque	FLRT2
5.80743e-14	1.31212	0.176	0.042	8.24539e-10	Macaque	MTURN
7.3033e-14	1.06789	0.476	0.355	1.03692e-09	Macaque	NUCKS1
9.27862e-14	1.02559	0.351	0.227	1.31738e-09	Macaque	BEX2
1.6384e-13	1.19094	0.291	0.149	2.3262e-09	Macaque	NRXN3
2.34997e-13	1.16905	0.253	0.122	3.33648e-09	Macaque	DPYSL5
3.59273e-13	1.36885	0.137	0.012	5.10095e-09	Macaque	KCTD12
3.72415e-13	1.1255	0.13	0.021	5.28755e-09	Macaque	AZU1
4.98014e-13	1.16225	0.164	0.052	7.07081e-09	Macaque	SARNP
6.84176e-13	1.20012	0.268	0.121	9.71393e-09	Macaque	TAOK1
7.28442e-13	1.27732	0.173	0.043	1.03424e-08	Macaque	SOX1
7.54069e-13	1.26828	0.218	0.084	1.07063e-08	Macaque	RSRP1
8.65989e-13	0.703568	0.668	0.66	1.22953e-08	Macaque	CALM1
9.28587e-13	1.06211	0.534	0.467	1.31841e-08	Macaque	FOXG1
1.15503e-12	1.08593	0.426	0.291	1.63991e-08	Macaque	TRA2A
1.18679e-12	1.03287	0.512	0.416	1.68501e-08	Macaque	NCAM1
1.20885e-12	0.990757	0.478	0.387	1.71633e-08	Macaque	DPYSL3
2.03773e-12	1.11806	0.111	0.012	2.89316e-08	Macaque	FGF14
2.49942e-12	0.420632	0.883	0.869	3.54867e-08	Macaque	SOX11
4.98913e-12	1.10268	0.138	0.03	7.08356e-08	Macaque	DIABLO
5.83635e-12	0.843996	0.509	0.445	8.28646e-08	Macaque	PNRC1
6.11544e-12	1.16308	0.233	0.107	8.6827e-08	Macaque	EFNB2
6.32607e-12	1.20932	0.123	0.012	8.98175e-08	Macaque	IPO11
7.90547e-12	1.0409	0.386	0.282	1.12242e-07	Macaque	YWHAG
8.08676e-12	1.03902	0.137	0.045	1.14816e-07	Macaque	SESN3
9.1644e-12	1.18009	0.313	0.176	1.30116e-07	Macaque	ROMO1
1.43007e-11	1.17966	0.21	0.091	2.03041e-07	Macaque	IPO9
1.44112e-11	0.98964	0.203	0.103	2.0461e-07	Macaque	NUP93
1.81726e-11	1.00722	0.171	0.064	2.58014e-07	Macaque	ARHGAP35
2.23412e-11	1.14396	0.12	0.015	3.172e-07	Macaque	S100A10
2.4033e-11	0.851836	0.596	0.519	3.4122e-07	Macaque	AKAP9
3.17703e-11	1.02021	0.116	0.024	4.51075e-07	Macaque	SCN9A
3.32242e-11	0.954789	0.109	0.025	4.71717e-07	Macaque	ZFP91
3.75297e-11	1.06506	0.209	0.097	5.32847e-07	Macaque	NAV3
4.28797e-11	1.28109	0.247	0.087	6.08806e-07	Macaque	LAGE3
4.95217e-11	0.637706	0.806	0.79	7.03108e-07	Macaque	FABP7
6.5652e-11	0.788492	0.436	0.382	9.32127e-07	Macaque	DST
8.36312e-11	0.601846	0.746	0.781	1.1874e-06	Macaque	DCX
8.96049e-11	1.21107	0.271	0.119	1.27221e-06	Macaque	GRIA2
1.18211e-10	1.051	0.158	0.055	1.67835e-06	Macaque	MAP2K2
1.36503e-10	1.08576	0.215	0.107	1.93807e-06	Macaque	STRBP
1.99784e-10	0.906224	0.262	0.166	2.83654e-06	Macaque	ZNF148
2.03581e-10	1.11423	0.329	0.196	2.89045e-06	Macaque	CELF1
3.93305e-10	0.990278	0.162	0.061	5.58415e-06	Macaque	PANK3
4.6048e-10	1.0621	0.324	0.213	6.5379e-06	Macaque	DCLK1
4.65239e-10	1.10662	0.149	0.045	6.60546e-06	Macaque	NDUFA7
5.59367e-10	0.905789	0.506	0.406	7.94189e-06	Macaque	ARRDC3
5.87916e-10	0.994568	0.235	0.134	8.34723e-06	Macaque	SCAMP1
7.84939e-10	1.00182	0.337	0.236	1.11446e-05	Macaque	MIF
8.44082e-10	1.06176	0.159	0.055	1.19843e-05	Macaque	COX16
8.83882e-10	1.15501	0.153	0.046	1.25494e-05	Macaque	SCHIP1
9.80767e-10	0.860367	0.403	0.331	1.39249e-05	Macaque	CFDP1
1.11034e-09	1.15255	0.117	0.006	1.57646e-05	Macaque	TRAPPC5
1.13903e-09	1.21184	0.247	0.107	1.6172e-05	Macaque	NGRN
1.48778e-09	1.00411	0.162	0.069	2.11235e-05	Macaque	FAM171B
1.49126e-09	0.851528	0.543	0.473	2.11729e-05	Macaque	HNRNPU
1.55239e-09	1.11593	0.139	0.03	2.20409e-05	Macaque	SLC6A1
1.63139e-09	1.0068	0.387	0.275	2.31624e-05	Macaque	KLC1
1.78946e-09	0.879436	0.109	0.028	2.54068e-05	Macaque	TEAD1
2.00714e-09	0.84107	0.416	0.369	2.84974e-05	Macaque	TMEM258
2.00844e-09	0.925508	0.503	0.431	2.85158e-05	Macaque	KAT6B
2.35431e-09	0.963799	0.252	0.16	3.34265e-05	Macaque	TCAF1
2.80264e-09	0.842106	0.152	0.082	3.97919e-05	Macaque	KRTCAP2
3.51905e-09	1.04556	0.134	0.043	4.99635e-05	Macaque	SOX5
3.65722e-09	1.10712	0.147	0.04	5.19252e-05	Macaque	ZNF827
3.72844e-09	1.06315	0.149	0.043	5.29363e-05	Macaque	TXNDC15
4.87085e-09	0.943807	0.141	0.058	6.91563e-05	Macaque	MFAP2
5.46316e-09	0.946495	0.298	0.201	7.7566e-05	Macaque	PAK3
6.04159e-09	1.05043	0.372	0.281	8.57785e-05	Macaque	CCND2
6.76305e-09	0.905726	0.122	0.045	9.60218e-05	Macaque	SATB1
7.05137e-09	1.00568	0.153	0.067	0.000100115	Macaque	PLXNC1
7.82827e-09	1.00165	0.245	0.14	0.000111146	Macaque	KMT2C
8.13735e-09	0.750982	0.476	0.427	0.000115534	Macaque	ITM2B
8.44903e-09	1.07732	0.14	0.04	0.000119959	Macaque	PCYOX1
8.70852e-09	0.902231	0.338	0.249	0.000123644	Macaque	TRIM2
1.04346e-08	0.961989	0.203	0.107	0.00014815	Macaque	ASXL3
1.66637e-08	0.954708	0.132	0.042	0.000236591	Macaque	CDV3
1.77748e-08	1.02499	0.212	0.101	0.000252366	Macaque	GSE1
2.15292e-08	0.9963	0.11	0.024	0.000305671	Macaque	ARL9
2.30371e-08	0.909318	0.195	0.106	0.000327081	Macaque	YPEL3
2.35566e-08	0.929713	0.113	0.03	0.000334457	Macaque	UBE2V1
2.4205e-08	0.968975	0.148	0.06	0.000343663	Macaque	CASK
2.64793e-08	0.940081	0.117	0.042	0.000375953	Macaque	FAM171A2
2.84317e-08	1.0273	0.172	0.073	0.000403673	Macaque	SRP19
3.37521e-08	0.914173	0.183	0.093	0.000479213	Macaque	ZNF300
3.60253e-08	1.08883	0.173	0.072	0.000511487	Macaque	CISD1
3.88174e-08	0.847683	0.312	0.236	0.000551129	Macaque	SPAG9
4.19327e-08	1.01614	0.111	0.027	0.000595361	Macaque	TGFB2
5.09604e-08	0.902667	0.281	0.19	0.000723535	Macaque	BMPR2
7.00502e-08	1.02241	0.279	0.175	0.000994573	Macaque	ARL4C
8.76611e-08	0.785935	0.475	0.428	0.00124461	Macaque	ANKRD12
8.86455e-08	1.02024	0.246	0.148	0.00125859	Macaque	DHRS7
1.04915e-07	1.27374	0.244	0.103	0.00148958	Macaque	CHD3
1.11538e-07	0.912113	0.378	0.293	0.00158362	Macaque	MEX3A
1.12388e-07	1.00525	0.356	0.258	0.00159569	Macaque	KMT2A
1.26893e-07	0.702094	0.383	0.351	0.00180163	Macaque	WDR83OS
1.422e-07	0.93272	0.224	0.13	0.00201895	Macaque	IRF2BP2
1.56815e-07	0.835278	0.336	0.255	0.00222647	Macaque	BPTF
1.61679e-07	1.02981	0.219	0.112	0.00229552	Macaque	RBM26
1.65232e-07	0.573874	0.616	0.6	0.00234596	Macaque	RND3
1.70273e-07	0.92752	0.245	0.151	0.00241753	Macaque	CCDC50
1.89228e-07	0.797757	0.327	0.249	0.00268666	Macaque	HNRNPD
1.99596e-07	1.09943	0.251	0.137	0.00283386	Macaque	ARID1B
2.28602e-07	0.981765	0.17	0.079	0.00324569	Macaque	LRP8
2.89214e-07	0.826876	0.127	0.054	0.00410626	Macaque	FEM1B
3.03445e-07	0.952964	0.112	0.03	0.00430832	Macaque	MXRA8
3.40052e-07	1.13942	0.194	0.082	0.00482806	Macaque	FAM107B
3.53889e-07	0.901702	0.131	0.051	0.00502451	Macaque	TTC28
3.72225e-07	0.958156	0.222	0.137	0.00528484	Macaque	AIMP1
3.94756e-07	0.912032	0.358	0.272	0.00560474	Macaque	MYCBP2
3.9823e-07	0.911742	0.152	0.07	0.00565407	Macaque	STOX2
4.99627e-07	0.69699	0.135	0.066	0.00709371	Macaque	POLB
5.155e-07	0.880951	0.141	0.067	0.00731907	Macaque	TLE3
5.22438e-07	0.348267	0.792	0.9	0.00741757	Macaque	UBB
5.24759e-07	0.70343	0.424	0.37	0.00745053	Macaque	ZNF292
6.15314e-07	0.879878	0.458	0.415	0.00873623	Macaque	RUNX1T1
7.03304e-07	0.962707	0.349	0.267	0.0099855	Macaque	MAP4K4
1.59661e-207	5.2504	0.982	0.07	2.26687e-203	Human	ACTB
5.77142e-198	3.66568	1	0.309	8.19427e-194	Human	EEF1A1
2.21696e-187	2.71104	0.999	0.57	3.14764e-183	Human	FTH1
6.91671e-150	2.93764	0.845	0.055	9.82034e-146	Human	SLC25A6
3.23495e-142	2.89668	0.799	0.049	4.59299e-138	Human	CHCHD2
1.58154e-140	3.17059	0.758	0.032	2.24546e-136	Human	COX7C
1.86579e-107	1.73758	0.964	0.44	2.64905e-103	Human	HNRNPA1
1.38019e-105	2.61504	0.669	0.047	1.95959e-101	Human	PPIA
1.94276e-100	2.31173	0.709	0.096	2.75833e-96	Human	PEBP1
4.45455e-88	1.40487	0.961	0.592	6.32457e-84	Human	YBX1
2.70611e-83	1.70207	0.937	0.441	3.84213e-79	Human	HMGN2
3.74489e-80	1.5485	0.942	0.434	5.317e-76	Human	NNAT
8.55878e-79	2.17143	0.606	0.085	1.21518e-74	Human	TMEM123
1.4043e-78	0.992625	0.996	0.813	1.99383e-74	Human	PTMA
3.03006e-78	1.3575	0.966	0.594	4.30208e-74	Human	FTL
5.22379e-76	1.1507	0.981	0.698	7.41673e-72	Human	MARCKSL1
3.37358e-75	1.67353	0.751	0.191	4.78981e-71	Human	DNAJB6
6.25371e-72	1.97586	0.536	0.054	8.87902e-68	Human	HSPA1A
6.59386e-71	1.99982	0.593	0.077	9.36196e-67	Human	SUMO1
3.89375e-67	1.61791	0.801	0.262	5.52834e-63	Human	CIRBP
9.52933e-66	1.44744	0.851	0.344	1.35297e-61	Human	BTF3
3.41717e-65	1.6661	0.627	0.131	4.8517e-61	Human	ATP6V1G1
4.60026e-65	1.42809	0.87	0.409	6.53145e-61	Human	RBP1
1.31735e-59	1.50527	0.576	0.119	1.87037e-55	Human	VAMP2
1.07118e-52	1.27973	0.749	0.286	1.52086e-48	Human	EEF2
2.11442e-50	1.39316	0.516	0.12	3.00205e-46	Human	TBCA
2.91491e-50	1.75061	0.404	0.034	4.13859e-46	Human	LDHB
1.5287e-46	1.10591	0.721	0.257	2.17045e-42	Human	TMA7
3.57013e-43	1.27578	0.619	0.183	5.06887e-39	Human	NPM1
5.73289e-43	0.947546	0.942	0.622	8.13955e-39	Human	MLLT11
3.71825e-42	1.36044	0.442	0.083	5.27917e-38	Human	EEF1D
4.41051e-42	1.79753	0.497	0.097	6.26204e-38	Human	FOS
1.08083e-40	1.03002	0.657	0.245	1.53456e-36	Human	ERH
1.66613e-39	1.29605	0.549	0.152	2.36557e-35	Human	SSR2
1.55422e-38	1.06095	0.527	0.17	2.20668e-34	Human	FABP5
5.20419e-37	1.22998	0.522	0.15	7.38891e-33	Human	UQCRB
1.24287e-35	0.83738	0.866	0.542	1.76463e-31	Human	TPT1
4.84179e-35	1.44338	0.24	0.002	6.87438e-31	Human	PGAM1
1.16009e-34	0.907737	0.773	0.369	1.6471e-30	Human	MYL6
1.9237e-33	1.35303	0.263	0.022	2.73127e-29	Human	TIMM8B
4.50427e-33	1.31755	0.319	0.046	6.39516e-29	Human	GPX1
7.16885e-33	1.34328	0.336	0.045	1.01783e-28	Human	UXT
3.25827e-32	1.13744	0.588	0.189	4.62609e-28	Human	WSB1
4.79927e-32	1.21353	0.434	0.098	6.81401e-28	Human	RPAIN
3.12441e-31	1.31579	0.246	0.015	4.43603e-27	Human	EMC4
5.56912e-31	1.22349	0.221	0.016	7.90704e-27	Human	FUNDC2
7.91593e-31	1.3603	0.257	0.022	1.1239e-26	Human	EIF4E
2.48028e-30	1.33469	0.237	0.015	3.5215e-26	Human	SNRPC
8.92531e-29	1.02772	0.384	0.096	1.26722e-24	Human	GUK1
2.40878e-28	0.888601	0.449	0.163	3.41999e-24	Human	TPGS2
2.47091e-28	0.706777	0.512	0.219	3.5082e-24	Human	PABPC1
3.28798e-28	0.835022	0.451	0.165	4.66828e-24	Human	CARHSP1
6.00169e-28	0.977037	0.572	0.199	8.52119e-24	Human	EIF3L
1.07165e-27	1.1967	0.312	0.051	1.52152e-23	Human	MAP3K13
2.60613e-27	1.24193	0.307	0.072	3.70018e-23	Human	DNAJB1
4.87976e-27	0.790295	0.787	0.406	6.92828e-23	Human	DDAH2
1.13126e-26	1.10402	0.3	0.056	1.60617e-22	Human	CYCS
1.77018e-26	1.22099	0.191	0.006	2.5133e-22	Human	DCK
2.10642e-26	0.988877	0.384	0.104	2.99069e-22	Human	PCBP2
4.8394e-26	1.02368	0.29	0.063	6.87098e-22	Human	ZNF91
8.09131e-26	1.19708	0.306	0.047	1.1488e-21	Human	UQCRC2
9.46236e-26	1.3272	0.227	0.013	1.34347e-21	Human	PEA15
1.0404e-25	0.704528	0.755	0.385	1.47717e-21	Human	COMMD6
1.07269e-25	0.656269	0.878	0.559	1.523e-21	Human	SUMO2
3.9224e-25	0.831456	0.767	0.374	5.56903e-21	Human	COX7A2
5.8657e-25	0.512324	0.999	0.983	8.32812e-21	Human	TUBA1A
3.33447e-24	1.12776	0.225	0.022	4.73428e-20	Human	ERP29
5.14522e-24	1.04548	0.367	0.084	7.30519e-20	Human	COX7A2L
9.07366e-24	0.94877	0.316	0.075	1.28828e-19	Human	DRAXIN
1.98871e-23	1.24406	0.163	0.008	2.82357e-19	Human	CXCR4
3.72435e-23	0.848022	0.222	0.048	5.28784e-19	Human	KLF6
4.73131e-23	0.69635	0.725	0.425	6.71752e-19	Human	PFN2
9.2158e-23	0.763503	0.499	0.192	1.30846e-18	Human	NDUFA5
1.5548e-22	0.900182	0.536	0.202	2.20751e-18	Human	NDUFB11
2.36e-22	0.959847	0.351	0.107	3.35072e-18	Human	ETFB
5.40844e-22	0.902811	0.318	0.081	7.67891e-18	Human	MED10
6.55759e-22	1.04946	0.173	0.01	9.31047e-18	Human	ZNHIT3
7.82375e-22	0.825131	0.351	0.114	1.11082e-17	Human	BNIP3L
8.49256e-22	1.02541	0.161	0.007	1.20577e-17	Human	DNAJB9
9.35243e-22	0.793391	0.375	0.119	1.32786e-17	Human	SNRPF
1.24839e-21	0.616039	0.53	0.236	1.77247e-17	Human	SAP18
2.90504e-21	0.780675	0.304	0.099	4.12458e-17	Human	SDCBP
3.23085e-21	1.10276	0.193	0.015	4.58717e-17	Human	TSPO
3.62298e-21	0.864682	0.473	0.176	5.1439e-17	Human	SOD1
4.88174e-21	0.874896	0.328	0.087	6.93109e-17	Human	SPSB3
5.35254e-21	0.728778	0.473	0.193	7.59954e-17	Human	CBX3
6.46239e-21	0.983894	0.288	0.069	9.1753e-17	Human	PPP1R15A
7.03612e-21	0.771369	0.415	0.158	9.98988e-17	Human	GSTA4
7.78182e-21	1.0621	0.222	0.026	1.10486e-16	Human	AP3S1
8.26433e-21	1.09802	0.57	0.276	1.17337e-16	Human	JUN
9.23278e-21	0.735973	0.576	0.253	1.31087e-16	Human	BRK1
9.90467e-21	0.931214	0.306	0.075	1.40626e-16	Human	OCIAD2
1.29779e-20	0.986011	0.13	0	1.8426e-16	Human	BEX5
1.3873e-20	0.962531	0.276	0.068	1.96968e-16	Human	ZKSCAN1
2.16607e-20	0.730797	0.661	0.325	3.07539e-16	Human	SRSF3
2.8134e-20	0.809042	0.513	0.205	3.99446e-16	Human	TAGLN3
3.58161e-20	1.03685	0.184	0.018	5.08518e-16	Human	SOX9
6.67705e-20	0.723849	0.346	0.122	9.48007e-16	Human	SNRPG
6.68752e-20	0.543106	0.77	0.488	9.49494e-16	Human	CKB
7.32611e-20	0.904721	0.13	0	1.04016e-15	Human	NLRP1
1.1898e-19	0.67528	0.799	0.454	1.68927e-15	Human	HNRNPA0
1.33742e-19	0.960216	0.149	0.003	1.89888e-15	Human	AKR1C1
1.61402e-19	0.688513	0.418	0.153	2.29159e-15	Human	ARPP19
1.96979e-19	0.926697	0.281	0.066	2.7967e-15	Human	PRELID1
2.08081e-19	0.923707	0.213	0.043	2.95433e-15	Human	MED30
2.81383e-19	0.662232	0.257	0.074	3.99507e-15	Human	RBM6
5.48592e-19	0.841006	0.287	0.073	7.78891e-15	Human	CHMP1B
5.79956e-19	0.939621	0.169	0.019	8.23422e-15	Human	FAM229B
3.23801e-18	0.937602	0.169	0.012	4.59733e-14	Human	NDUFB3
3.67271e-18	0.851485	0.248	0.061	5.21452e-14	Human	COMMD2
5.68948e-18	0.705586	0.57	0.25	8.07792e-14	Human	GPX4
7.37228e-18	0.758145	0.255	0.072	1.04672e-13	Human	ARL6IP6
7.43245e-18	0.771187	0.152	0.027	1.05526e-13	Human	SCD5
9.04284e-18	0.832775	0.315	0.099	1.2839e-13	Human	TSPAN13
1.01591e-17	0.76803	0.309	0.095	1.44239e-13	Human	MDH2
1.14045e-17	0.8971	0.181	0.018	1.61922e-13	Human	UBE2L6
1.68091e-17	0.550846	0.34	0.131	2.38656e-13	Human	CUTA
2.12864e-17	0.797842	0.136	0.009	3.02224e-13	Human	RARS2
3.76613e-17	0.682088	0.118	0.01	5.34715e-13	Human	RDH11
3.80906e-17	0.648901	0.355	0.136	5.4081e-13	Human	ILF2
3.84206e-17	0.570105	0.403	0.171	5.45496e-13	Human	MEAF6
5.38115e-17	0.716954	0.519	0.229	7.64015e-13	Human	HSPE1
6.28117e-17	0.494974	0.899	0.646	8.91801e-13	Human	CFL1
6.32692e-17	0.896493	0.187	0.03	8.98296e-13	Human	PEG10
6.59723e-17	0.595047	0.579	0.294	9.36674e-13	Human	EEF1B2
7.5723e-17	0.565452	0.393	0.175	1.07512e-12	Human	SMARCB1
1.4772e-16	0.838052	0.327	0.096	2.09733e-12	Human	MAP1LC3B
1.49271e-16	0.855769	0.151	0.017	2.11935e-12	Human	SSNA1
1.66556e-16	0.615872	0.204	0.06	2.36476e-12	Human	POLR2C
2.07515e-16	0.716382	0.243	0.071	2.94629e-12	Human	NDUFV2
2.76804e-16	0.75078	0.328	0.105	3.93006e-12	Human	ALDOA
2.97867e-16	0.824129	0.184	0.03	4.22912e-12	Human	PHB2
3.13609e-16	0.68775	0.327	0.114	4.45262e-12	Human	KIF21A
6.8038e-16	0.446941	0.86	0.612	9.66004e-12	Human	GAPDH
7.13003e-16	0.655497	0.258	0.078	1.01232e-11	Human	TOMM22
7.48391e-16	0.774195	0.112	0.004	1.06257e-11	Human	GLRA2
8.47606e-16	0.778669	0.161	0.024	1.20343e-11	Human	SBDS
8.91639e-16	0.681527	0.142	0.024	1.26595e-11	Human	ACADM
8.97062e-16	0.826445	0.297	0.077	1.27365e-11	Human	DTD1
1.11351e-15	0.813711	0.367	0.116	1.58096e-11	Human	STRAP
1.15051e-15	0.776857	0.231	0.059	1.6335e-11	Human	NUDT3
1.19726e-15	0.535947	0.673	0.375	1.69987e-11	Human	TUBA1B
1.48411e-15	0.36476	0.519	0.27	2.10714e-11	Human	SF3B6
2.35039e-15	0.794691	0.122	0.009	3.33708e-11	Human	NUBP2
2.39424e-15	0.928287	0.13	0.002	3.39934e-11	Human	GPR82
2.61437e-15	0.698676	0.176	0.04	3.71188e-11	Human	CRYZL1
2.65473e-15	0.789031	0.154	0.026	3.76918e-11	Human	ZNF397
2.77351e-15	0.689518	0.206	0.056	3.93783e-11	Human	IDH3G
3.34166e-15	0.780105	0.16	0.027	4.74448e-11	Human	SDHC
3.56292e-15	0.572717	0.413	0.172	5.05864e-11	Human	SPCS2
4.38074e-15	0.56915	0.542	0.256	6.21977e-11	Human	LSM7
4.53118e-15	0.684842	0.369	0.153	6.43337e-11	Human	HSPD1
7.23311e-15	0.428385	0.827	0.569	1.02696e-10	Human	YWHAQ
7.41519e-15	0.664463	0.173	0.05	1.05281e-10	Human	MRPL18
8.50387e-15	0.563701	0.539	0.255	1.20738e-10	Human	EIF3H
1.10033e-14	0.730352	0.128	0.014	1.56226e-10	Human	IFRD1
1.1412e-14	0.643734	0.131	0.025	1.62027e-10	Human	PHLDA1
1.14638e-14	0.441828	0.437	0.214	1.62763e-10	Human	UBE2D2
1.17442e-14	0.442554	0.57	0.294	1.66744e-10	Human	TBCB
1.24334e-14	0.6072	0.348	0.128	1.76529e-10	Human	NDUFB8
1.24818e-14	0.624702	0.43	0.178	1.77217e-10	Human	ARL6IP1
1.83622e-14	0.607048	0.606	0.325	2.60706e-10	Human	DNAJA1
1.91922e-14	0.705643	0.267	0.086	2.72491e-10	Human	MRPL42
1.97193e-14	0.777263	0.182	0.036	2.79974e-10	Human	RPRM
2.37615e-14	0.520904	0.764	0.436	3.37366e-10	Human	HMGN1
2.41259e-14	0.583424	0.169	0.051	3.4254e-10	Human	GTF3A
2.8325e-14	0.594472	0.14	0.035	4.02158e-10	Human	CCDC14
3.14169e-14	0.791184	0.145	0.021	4.46057e-10	Human	PRKX
4.103e-14	0.585079	0.4	0.166	5.82543e-10	Human	PRDX1
5.83205e-14	0.850627	0.172	0.034	8.28035e-10	Human	DUSP4
6.13942e-14	0.654498	0.222	0.068	8.71675e-10	Human	SLC3A2
7.23763e-14	0.657676	0.113	0.011	1.0276e-09	Human	ZNF3
8.03739e-14	0.779265	0.148	0.022	1.14115e-09	Human	PRKCA
8.09655e-14	0.561953	0.424	0.201	1.14955e-09	Human	CAPZA2
1.06998e-13	0.691566	0.148	0.025	1.51916e-09	Human	ZNF791
1.13027e-13	0.505005	0.239	0.088	1.60476e-09	Human	PSMC1
1.23024e-13	0.74163	0.167	0.034	1.74669e-09	Human	PDIA3
1.27808e-13	0.543626	0.233	0.085	1.81462e-09	Human	CAPZB
1.45835e-13	0.680189	0.291	0.101	2.07056e-09	Human	YTHDF2
1.9218e-13	0.77718	0.316	0.104	2.72857e-09	Human	SERP1
2.11193e-13	0.679065	0.201	0.051	2.99852e-09	Human	HNRNPH2
2.19967e-13	0.590174	0.524	0.249	3.12309e-09	Human	PARK7
2.90074e-13	0.563714	0.237	0.086	4.11848e-09	Human	AURKAIP1
3.22893e-13	0.520771	0.616	0.351	4.58444e-09	Human	TXN
3.56814e-13	0.567812	0.251	0.085	5.06605e-09	Human	DGUOK
4.23247e-13	0.678197	0.309	0.106	6.00926e-09	Human	EIF3I
4.28307e-13	0.416863	0.504	0.264	6.0811e-09	Human	RSL24D1
5.02853e-13	0.581312	0.297	0.104	7.13951e-09	Human	UPF3A
5.50816e-13	0.652989	0.101	0.01	7.82048e-09	Human	CHMP1A
5.76526e-13	0.574438	0.737	0.402	8.18552e-09	Human	NDUFA4
5.99703e-13	0.687544	0.109	0.007	8.51458e-09	Human	SNRNP40
6.06144e-13	0.490815	0.263	0.104	8.60603e-09	Human	MMADHC
6.60965e-13	0.356439	0.372	0.186	9.38438e-09	Human	PSMD8
9.4296e-13	0.634906	0.354	0.143	1.33881e-08	Human	NAP1L1
9.60908e-13	0.716353	0.127	0.015	1.3643e-08	Human	YIPF4
1.09586e-12	0.7375	0.121	0.01	1.5559e-08	Human	WNT7A
1.10841e-12	0.386597	0.237	0.098	1.57372e-08	Human	CRIP2
1.11126e-12	0.484281	0.666	0.418	1.57776e-08	Human	DLX5
1.16219e-12	0.712635	0.237	0.069	1.65008e-08	Human	TRAPPC1
1.32023e-12	0.396301	0.301	0.136	1.87447e-08	Human	GTF2A2
1.38213e-12	0.629019	0.412	0.195	1.96235e-08	Human	IER2
1.3883e-12	0.601058	0.239	0.081	1.97111e-08	Human	PSMB3
1.39915e-12	0.41696	0.385	0.187	1.98651e-08	Human	RCN2
1.40614e-12	0.766186	0.199	0.046	1.99644e-08	Human	EGR1
1.45128e-12	0.683856	0.119	0.016	2.06053e-08	Human	NUP160
1.49936e-12	0.63253	0.13	0.026	2.12879e-08	Human	LYRM2
1.5341e-12	0.670912	0.103	0.009	2.17811e-08	Human	FEZ2
1.66377e-12	0.597426	0.106	0.013	2.36221e-08	Human	FAHD1
1.7001e-12	0.45079	0.163	0.056	2.4138e-08	Human	CPE
1.71464e-12	0.40778	0.436	0.219	2.43445e-08	Human	LAMTOR5
1.98817e-12	0.328103	0.293	0.146	2.8228e-08	Human	EIF4B
2.50751e-12	0.498019	0.325	0.14	3.56016e-08	Human	SH3BGRL
2.70148e-12	0.515497	0.412	0.197	3.83556e-08	Human	N4BP2L2
2.76867e-12	0.554771	0.285	0.114	3.93095e-08	Human	FAM133B
2.79565e-12	0.502826	0.199	0.073	3.96927e-08	Human	NELFCD
3.01786e-12	0.560888	0.127	0.028	4.28476e-08	Human	ZNF75A
3.08487e-12	0.413959	0.309	0.141	4.3799e-08	Human	RAB18
3.09661e-12	0.719005	0.104	0.008	4.39657e-08	Human	MRPL54
3.51597e-12	0.490788	0.246	0.101	4.99197e-08	Human	UQCRFS1
3.7941e-12	0.447879	0.339	0.146	5.38687e-08	Human	HSPB1
3.80208e-12	0.754776	0.175	0.035	5.3982e-08	Human	TLE1
3.82304e-12	0.562566	0.127	0.029	5.42795e-08	Human	EMC3
4.48645e-12	0.807168	0.158	0.026	6.36987e-08	Human	MPC1
4.66975e-12	0.687692	0.349	0.135	6.6301e-08	Human	TPI1
5.26542e-12	0.613784	0.1	0.01	7.47584e-08	Human	NSUN6
7.69481e-12	0.471515	0.155	0.052	1.09251e-07	Human	CDK5RAP3
9.04131e-12	0.337267	0.409	0.209	1.28369e-07	Human	TCP1
9.14924e-12	0.485276	0.299	0.133	1.29901e-07	Human	PCNP
9.67214e-12	0.554188	0.1	0.013	1.37325e-07	Human	TMEM33
1.15135e-11	0.516898	0.169	0.053	1.63469e-07	Human	ARFGAP2
1.15563e-11	0.321735	0.318	0.16	1.64076e-07	Human	NDUFA12
1.19971e-11	0.608015	0.136	0.028	1.70335e-07	Human	PDZRN4
1.20689e-11	0.657003	0.23	0.072	1.71354e-07	Human	ECHS1
1.25755e-11	0.432167	0.222	0.09	1.78547e-07	Human	TM2D3
1.35845e-11	0.524072	0.458	0.21	1.92872e-07	Human	ST13
1.47961e-11	0.547353	0.2	0.061	2.10075e-07	Human	RBM23
1.60264e-11	0.572013	0.107	0.014	2.27543e-07	Human	NHLRC3
2.00984e-11	0.438928	0.328	0.146	2.85356e-07	Human	PDAP1
2.27866e-11	0.528909	0.312	0.128	3.23524e-07	Human	PSMC3
2.34538e-11	0.344937	0.224	0.1	3.32997e-07	Human	CRBN
2.40408e-11	0.562789	0.1	0.014	3.41332e-07	Human	RFC2
2.47147e-11	0.468176	0.124	0.035	3.50899e-07	Human	WDR13
2.92815e-11	0.624313	0.122	0.022	4.15738e-07	Human	MED28
2.98029e-11	0.464584	0.243	0.096	4.23142e-07	Human	TMEM14A
3.00876e-11	0.538548	0.119	0.025	4.27183e-07	Human	ZNF677
3.34972e-11	0.55074	0.207	0.065	4.75593e-07	Human	ACTR1A
3.73226e-11	0.348499	0.5	0.288	5.29907e-07	Human	SEC61G
3.75808e-11	0.545721	0.222	0.073	5.33572e-07	Human	PSMB2
3.78311e-11	0.555341	0.375	0.165	5.37125e-07	Human	SF3B2
3.93523e-11	0.458177	0.164	0.057	5.58723e-07	Human	ORMDL1
4.05313e-11	0.560227	0.146	0.036	5.75464e-07	Human	TXNDC17
4.1997e-11	0.562948	0.364	0.156	5.96274e-07	Human	COPE
4.68432e-11	0.383083	0.364	0.187	6.6508e-07	Human	RDX
5.26328e-11	0.556448	0.118	0.026	7.4728e-07	Human	GGA1
5.87769e-11	0.706061	0.127	0.016	8.34514e-07	Human	PUS7L
5.93248e-11	0.414119	0.512	0.266	8.42293e-07	Human	EIF3E
5.99516e-11	0.696164	0.119	0.015	8.51193e-07	Human	MRPS33
6.19033e-11	0.524266	0.157	0.051	8.78904e-07	Human	LEPROTL1
6.58005e-11	0.551096	0.187	0.055	9.34235e-07	Human	SLC25A5
6.68532e-11	0.388279	0.118	0.04	9.49182e-07	Human	SLIT1
7.09078e-11	0.426165	0.194	0.074	1.00675e-06	Human	FZD3
7.1517e-11	0.363832	0.334	0.164	1.0154e-06	Human	PPP2R1A
7.17984e-11	0.508567	0.118	0.027	1.01939e-06	Human	SNRNP25
7.31148e-11	0.483209	0.2	0.078	1.03808e-06	Human	EXOC7
8.3126e-11	0.278881	0.609	0.377	1.18022e-06	Human	UQCRH
1.03737e-10	0.392518	0.427	0.232	1.47286e-06	Human	OAZ2
1.0734e-10	0.30955	0.533	0.311	1.52402e-06	Human	HNRNPC
1.07722e-10	0.62649	0.19	0.05	1.52944e-06	Human	MICU1
1.16848e-10	0.567672	0.212	0.071	1.65901e-06	Human	CCNL2
1.23282e-10	0.616445	0.44	0.258	1.75035e-06	Human	SCGN
1.29722e-10	0.477146	0.133	0.04	1.84179e-06	Human	PRPF31
1.33562e-10	0.356844	0.784	0.513	1.89631e-06	Human	ZNF428
1.35184e-10	0.482164	0.315	0.128	1.91934e-06	Human	TXNL1
1.36988e-10	0.5534	0.122	0.025	1.94495e-06	Human	POLD2
1.43319e-10	0.458067	0.516	0.28	2.03484e-06	Human	AP2M1
1.5112e-10	0.416104	0.154	0.053	2.1456e-06	Human	PHKB
1.62888e-10	0.403872	0.552	0.314	2.31268e-06	Human	EDF1
1.72142e-10	0.373789	0.349	0.16	2.44408e-06	Human	VBP1
1.8005e-10	0.351753	0.187	0.076	2.55635e-06	Human	HERPUD1
2.0544e-10	0.292848	0.433	0.221	2.91683e-06	Human	SEC61B
2.16506e-10	0.473357	0.157	0.046	3.07396e-06	Human	CDKN2AIP
2.21729e-10	0.45426	0.431	0.228	3.14811e-06	Human	RBM8A
2.57173e-10	0.481034	0.221	0.079	3.65135e-06	Human	SUPT4H1
2.70882e-10	0.497388	0.269	0.112	3.84598e-06	Human	PSMD4
2.82077e-10	0.399091	0.163	0.061	4.00493e-06	Human	MED17
3.0288e-10	0.431657	0.404	0.19	4.30029e-06	Human	UQCRQ
3.05926e-10	0.302789	0.103	0.032	4.34354e-06	Human	CHMP4A
3.22181e-10	0.603257	0.121	0.023	4.57433e-06	Human	AMZ2
3.34695e-10	0.443839	0.299	0.133	4.752e-06	Human	RNPS1
3.51648e-10	0.314727	0.236	0.11	4.9927e-06	Human	ZNF326
4.01632e-10	0.596324	0.133	0.028	5.70238e-06	Human	ERV3-1
4.71622e-10	0.354116	0.291	0.137	6.69609e-06	Human	TRIM36
5.94444e-10	0.527122	0.149	0.04	8.43992e-06	Human	MTX2
6.13505e-10	0.567981	0.119	0.028	8.71054e-06	Human	SMIM15
6.47311e-10	0.379189	0.307	0.138	9.19052e-06	Human	ALKBH7
6.91043e-10	0.567946	0.109	0.02	9.81143e-06	Human	ZNF692
7.17013e-10	0.5419	0.101	0.021	1.01801e-05	Human	EIF2AK2
7.19891e-10	0.429657	0.104	0.026	1.0221e-05	Human	ABCD4
7.31675e-10	0.464721	0.215	0.083	1.03883e-05	Human	MRPL43
7.55855e-10	0.510232	0.316	0.144	1.07316e-05	Human	TMED2
8.22818e-10	0.500124	0.11	0.028	1.16824e-05	Human	SYP
8.37036e-10	0.304359	0.987	0.92	1.18842e-05	Human	TUBB
8.76553e-10	0.590604	0.158	0.044	1.24453e-05	Human	WDR33
9.13656e-10	0.479279	0.124	0.032	1.29721e-05	Human	LCMT1
9.35689e-10	0.528441	0.27	0.115	1.32849e-05	Human	PSAP
9.90536e-10	0.559606	0.118	0.029	1.40636e-05	Human	AGO3
1.08531e-09	0.391389	0.182	0.063	1.54092e-05	Human	COMMD7
1.11283e-09	0.392115	0.309	0.135	1.57999e-05	Human	NDUFS6
1.15474e-09	0.237046	0.864	0.683	1.6395e-05	Human	CALM2
1.23617e-09	0.362944	0.294	0.135	1.75512e-05	Human	ESD
1.41569e-09	0.449758	0.155	0.051	2.01e-05	Human	ISCU
1.49006e-09	0.447957	0.282	0.129	2.11559e-05	Human	PFN1
1.55406e-09	0.354794	0.119	0.035	2.20646e-05	Human	CCZ1
1.56612e-09	0.27033	0.269	0.133	2.22358e-05	Human	PPP4C
1.60043e-09	0.515187	0.152	0.047	2.27229e-05	Human	GLG1
1.65518e-09	0.438728	0.193	0.072	2.35003e-05	Human	GNG3
1.7161e-09	0.462566	0.17	0.059	2.43651e-05	Human	LEPROT
1.7234e-09	0.40204	0.193	0.081	2.44688e-05	Human	MAGEF1
1.83609e-09	0.559196	0.17	0.05	2.60688e-05	Human	FIBP
1.83722e-09	0.333868	0.297	0.148	2.60849e-05	Human	GADD45GIP1
1.85332e-09	0.391869	0.293	0.132	2.63135e-05	Human	ATP6V0B
1.88051e-09	0.338009	0.493	0.261	2.66995e-05	Human	PFDN2
2.01975e-09	0.517098	0.306	0.126	2.86764e-05	Human	GNAI3
2.03481e-09	0.386198	0.106	0.03	2.88902e-05	Human	HPCA
2.11484e-09	0.593183	0.182	0.058	3.00264e-05	Human	TMTC4
2.1357e-09	0.263964	0.306	0.157	3.03227e-05	Human	SLC39A6
2.15584e-09	0.299882	0.155	0.071	3.06086e-05	Human	TSSC4
2.17739e-09	0.396329	0.358	0.176	3.09146e-05	Human	UBE2V2
2.26786e-09	0.631797	0.179	0.051	3.2199e-05	Human	TSN
2.39921e-09	0.480688	0.118	0.028	3.4064e-05	Human	VOPP1
2.42226e-09	0.403309	0.409	0.196	3.43913e-05	Human	SYF2
2.44391e-09	0.268023	0.11	0.037	3.46987e-05	Human	HOMER3
2.6619e-09	0.445416	0.185	0.074	3.77937e-05	Human	ACP1
2.71561e-09	0.540719	0.152	0.044	3.85563e-05	Human	TUBA1C
2.73552e-09	0.472149	0.143	0.046	3.88389e-05	Human	AKR1B1
2.81493e-09	0.559302	0.166	0.051	3.99664e-05	Human	PTS
2.95193e-09	0.488842	0.115	0.03	4.19116e-05	Human	HIP1R
3.19095e-09	0.500293	0.146	0.044	4.53051e-05	Human	ECH1
3.34185e-09	0.30789	0.101	0.035	4.74475e-05	Human	TM2D2
3.4427e-09	0.229999	0.194	0.106	4.88794e-05	Human	MRPL57
4.07082e-09	0.400319	0.1	0.021	5.77975e-05	Human	MRPS2
4.81574e-09	0.462352	0.166	0.057	6.83739e-05	Human	POLR2G
4.89876e-09	0.420048	0.154	0.056	6.95526e-05	Human	NKIRAS2
5.01506e-09	0.386266	0.249	0.119	7.12039e-05	Human	RAB5C
5.1505e-09	0.485108	0.179	0.057	7.31269e-05	Human	NUDT1
5.80845e-09	0.60438	0.224	0.091	8.24683e-05	Human	PLK2
6.20361e-09	0.594159	0.155	0.039	8.80788e-05	Human	NGDN
7.07804e-09	0.531404	0.143	0.039	0.000100494	Human	SNX2
7.6901e-09	0.486571	0.119	0.033	0.000109184	Human	MTMR4
7.71576e-09	0.527096	0.13	0.034	0.000109548	Human	NOC2L
8.04397e-09	0.339969	0.103	0.035	0.000114208	Human	HSPA13
8.30281e-09	0.399823	0.201	0.085	0.000117883	Human	EZR
8.86783e-09	0.324285	0.169	0.077	0.000125905	Human	NT5C3A
9.02391e-09	0.663574	0.176	0.048	0.000128122	Human	NARF
9.05676e-09	0.463953	0.124	0.033	0.000128588	Human	CDCA7L
9.33217e-09	0.407653	0.187	0.073	0.000132498	Human	MRPL21
1.11311e-08	0.334382	0.26	0.117	0.00015804	Human	SMS
1.14302e-08	0.505346	0.331	0.146	0.000162286	Human	NKTR
1.14547e-08	0.360776	0.261	0.121	0.000162633	Human	OLA1
1.17211e-08	0.450474	0.136	0.046	0.000166416	Human	BAD
1.51797e-08	0.458876	0.14	0.041	0.000215521	Human	PSMF1
1.58516e-08	0.377704	0.215	0.083	0.000225061	Human	ARL2BP
1.62597e-08	0.50246	0.216	0.083	0.000230855	Human	CCDC12
1.62958e-08	0.223225	0.325	0.173	0.000231368	Human	KRT10
1.65356e-08	0.446737	0.846	0.56	0.000234773	Human	HMGB1
1.89952e-08	0.423694	0.554	0.293	0.000269694	Human	COX6B1
2.26754e-08	0.487981	0.185	0.066	0.000321946	Human	EI24
2.27263e-08	0.347549	0.122	0.044	0.000322669	Human	TSPAN14
2.37342e-08	0.392158	0.118	0.036	0.000336978	Human	NUP62
2.38424e-08	0.394891	0.263	0.123	0.000338514	Human	TUFM
2.38769e-08	0.344703	0.254	0.118	0.000339004	Human	PPP2CA
2.39423e-08	0.421411	0.412	0.201	0.000339933	Human	ANAPC11
2.49837e-08	0.381468	0.237	0.1	0.000354719	Human	FAM200B
2.55634e-08	0.344367	0.427	0.212	0.000362949	Human	GAP43
2.65878e-08	0.456778	0.13	0.04	0.000377493	Human	ELOVL6
3.12559e-08	0.385906	0.561	0.321	0.000443772	Human	HNRNPM
3.23631e-08	0.463424	0.384	0.196	0.000459491	Human	DDX24
3.44849e-08	0.500555	0.161	0.051	0.000489617	Human	SUMO3
3.46175e-08	0.348939	0.225	0.1	0.000491499	Human	DNAJC7
3.64654e-08	0.284191	0.521	0.31	0.000517735	Human	FUS
3.96253e-08	0.282997	0.279	0.136	0.000562601	Human	MOB4
3.97691e-08	0.409485	0.325	0.147	0.000564642	Human	LSM5
4.74264e-08	0.400401	0.13	0.041	0.00067336	Human	PMVK
4.87477e-08	0.617536	0.161	0.044	0.000692119	Human	RNASEH2B
4.93537e-08	0.36468	0.167	0.066	0.000700724	Human	SAP30BP
5.00019e-08	0.47176	0.107	0.026	0.000709927	Human	MRPL28
5.01006e-08	0.399698	0.572	0.3	0.000711328	Human	HSBP1
5.19632e-08	0.393736	0.137	0.049	0.000737774	Human	LRRN3
6.22833e-08	0.369614	0.23	0.094	0.000884299	Human	APLP1
6.29695e-08	0.411882	0.472	0.247	0.000894041	Human	MYL12B
6.47009e-08	0.434854	0.119	0.038	0.000918623	Human	MTERF4
6.66639e-08	0.442255	0.291	0.117	0.000946493	Human	POLR2K
7.37126e-08	0.408508	0.166	0.07	0.00104657	Human	DNTTIP2
7.74195e-08	0.273739	0.293	0.157	0.0010992	Human	SF1
8.12774e-08	0.461891	0.137	0.042	0.00115398	Human	MRPS35
8.22373e-08	0.386676	0.115	0.039	0.0011676	Human	PDHB
8.30262e-08	0.392895	0.252	0.107	0.00117881	Human	CSRP2
8.8701e-08	0.495451	0.121	0.036	0.00125938	Human	SPECC1
8.87624e-08	0.301375	0.137	0.052	0.00126025	Human	DNAAF2
9.80859e-08	0.425894	0.196	0.069	0.00139262	Human	SNX4
9.93277e-08	0.626772	0.128	0.021	0.00141025	Human	DCAF13
1.02708e-07	0.346716	0.388	0.196	0.00145825	Human	PRMT2
1.06883e-07	0.318552	0.149	0.061	0.00151753	Human	CFL2
1.09948e-07	0.391753	0.197	0.076	0.00156104	Human	NDUFV1
1.23084e-07	0.308945	0.215	0.086	0.00174754	Human	STX12
1.24943e-07	0.381706	0.11	0.034	0.00177394	Human	MRPS10
1.25094e-07	0.485398	0.443	0.213	0.00177608	Human	PRDX5
1.28642e-07	0.416596	0.27	0.126	0.00182646	Human	UBE2L3
1.33909e-07	0.362936	0.188	0.08	0.00190124	Human	TTLL7
1.34669e-07	0.319522	0.212	0.102	0.00191202	Human	LBH
1.41879e-07	0.497766	0.113	0.029	0.00201439	Human	TMUB2
1.54702e-07	0.407466	0.207	0.086	0.00219646	Human	GABPB1
1.58716e-07	0.369821	0.157	0.06	0.00225344	Human	CAP1
1.59959e-07	0.360888	0.254	0.124	0.0022711	Human	FAM32A
1.62278e-07	0.357985	0.593	0.347	0.00230403	Human	EID1
1.65213e-07	0.319462	0.149	0.063	0.0023457	Human	CCDC124
1.72062e-07	0.339447	0.287	0.146	0.00244294	Human	PAX6
2.0149e-07	0.526706	0.103	0.022	0.00286075	Human	FGD3
2.02737e-07	0.314995	0.11	0.039	0.00287847	Human	TRIM16
2.08426e-07	0.268245	0.484	0.274	0.00295923	Human	EIF3F
2.20408e-07	0.284556	0.16	0.071	0.00312936	Human	EXOSC8
2.24988e-07	0.487414	0.157	0.047	0.00319438	Human	WLS
2.26578e-07	0.564838	0.143	0.042	0.00321696	Human	SMIM20
2.38891e-07	0.570571	0.14	0.034	0.00339177	Human	IDI1
2.68216e-07	0.502584	0.142	0.039	0.00380812	Human	MRPL3
2.69829e-07	0.456641	0.128	0.04	0.00383103	Human	PRCC
2.69866e-07	0.381295	0.393	0.206	0.00383155	Human	GDI1
2.74795e-07	0.365871	0.119	0.039	0.00390154	Human	PLEKHJ1
2.75244e-07	0.383371	0.125	0.041	0.00390792	Human	TRIAP1
2.86855e-07	0.379555	0.242	0.105	0.00407277	Human	BSG
2.88573e-07	0.283435	0.104	0.04	0.00409715	Human	WDR1
2.91561e-07	0.257758	0.148	0.07	0.00413958	Human	CDO1
3.06998e-07	0.300857	0.303	0.161	0.00435876	Human	CCT4
3.07353e-07	0.337111	0.149	0.058	0.0043638	Human	MRPS18C
3.19576e-07	0.322399	0.561	0.344	0.00453733	Human	FXYD6
3.34184e-07	0.455066	0.333	0.152	0.00474474	Human	SAT2
3.41097e-07	0.268075	0.179	0.085	0.0048429	Human	USE1
3.56015e-07	0.234098	0.655	0.421	0.0050547	Human	FEZ1
3.67789e-07	0.430874	0.206	0.077	0.00522187	Human	ENO2
3.98032e-07	0.241264	0.43	0.26	0.00565125	Human	SRSF7
4.04186e-07	0.371855	0.257	0.118	0.00573863	Human	CUEDC2
4.57606e-07	0.297007	0.112	0.039	0.00649709	Human	TSNAX
4.85148e-07	0.359582	0.122	0.042	0.00688814	Human	ATP6V1H
4.91112e-07	0.402567	0.178	0.067	0.00697281	Human	RNF181
5.21504e-07	0.369062	0.167	0.063	0.00740431	Human	TCTEX1D2
5.22877e-07	0.287072	0.128	0.052	0.0074238	Human	DNER
5.25443e-07	0.248287	0.173	0.081	0.00746024	Human	TMED9
5.60153e-07	0.454429	0.125	0.033	0.00795306	Human	PDCL3
5.68939e-07	0.242447	0.94	0.807	0.0080778	Human	EIF1
5.72796e-07	0.384727	0.139	0.046	0.00813256	Human	MSMO1
6.30113e-07	0.511629	0.216	0.083	0.00894634	Human	SLC38A1
6.31039e-07	0.467194	0.185	0.068	0.00895949	Human	ZNF821
6.36164e-07	0.260714	0.145	0.067	0.00903226	Human	ERI3
6.56983e-07	0.302183	0.243	0.119	0.00932784	Human	YPEL5

## Sheet: MSC_human.vs.macaque
Table S10. Shared and unique regional and species DEGs for MEIS2 PAX6 SCGN cells.
p_val	avg_log2FC	pct.1	pct.2	p_val_adj	cluster	gene
1.93227e-100	2.72212	0.632	0.067	2.74344e-96	Macaque	GABARAP
1.92756e-92	2.38311	0.826	0.533	2.73675e-88	Macaque	FOXG1
3.18478e-88	2.02366	0.859	0.518	4.52176e-84	Macaque	ZNF704
1.72784e-83	1.75487	0.851	0.597	2.45319e-79	Macaque	CCDC88A
4.46459e-74	2.19846	0.753	0.418	6.33883e-70	Macaque	NFIA
5.37202e-67	1.2866	0.942	0.838	7.62719e-63	Macaque	TCF4
8.82157e-64	2.52816	0.421	0.007	1.25249e-59	Macaque	SLC10A4
4.95301e-56	2.33388	0.404	0.013	7.03229e-52	Macaque	IGFBPL1
2.73175e-55	1.48043	0.714	0.468	3.87854e-51	Macaque	DDX17
5.97349e-54	1.73787	0.672	0.383	8.48116e-50	Macaque	AP1S2
6.8377e-54	1.15632	0.903	0.824	9.70817e-50	Macaque	DCX
1.03732e-50	1.70757	0.659	0.35	1.47278e-46	Macaque	QKI
1.51344e-50	2.08978	0.542	0.168	2.14878e-46	Macaque	ARID1B
1.11941e-49	0.828791	0.998	0.999	1.58934e-45	Macaque	SOX4
1.24345e-49	2.34275	0.318	0.001	1.76544e-45	Macaque	MATR3
7.40525e-47	1.92089	0.589	0.245	1.0514e-42	Macaque	BCL11B
1.54618e-45	1.6794	0.722	0.474	2.19527e-41	Macaque	KAT6B
6.32456e-45	1.63696	0.584	0.286	8.97961e-41	Macaque	YWHAG
1.25386e-43	0.924603	0.958	0.893	1.78023e-39	Macaque	SOX11
6.44275e-43	1.06883	0.772	0.638	9.14741e-39	Macaque	DLX1
2.55597e-42	1.56107	0.579	0.309	3.62896e-38	Macaque	SP8
8.28401e-42	1.64858	0.526	0.234	1.17616e-37	Macaque	APP
5.69838e-41	2.58324	0.272	0.017	8.09056e-37	Macaque	EEF1G
1.29835e-39	2.64757	0.281	0.015	1.8434e-35	Macaque	PCP4
1.46643e-38	1.28929	0.773	0.568	2.08203e-34	Macaque	MAP2
9.74785e-38	1.45471	0.673	0.412	1.384e-33	Macaque	SRRM2
1.50209e-37	1.4246	0.522	0.295	2.13266e-33	Macaque	IFI27L2
5.26276e-37	1.43078	0.691	0.447	7.47207e-33	Macaque	NCAM1
6.6053e-37	1.76691	0.358	0.081	9.37821e-33	Macaque	SOGA1
1.90668e-36	1.72219	0.482	0.172	2.7071e-32	Macaque	TAOK1
1.84298e-35	1.3964	0.621	0.368	2.61666e-31	Macaque	MAP4K4
4.41264e-35	1.66344	0.385	0.108	6.26507e-31	Macaque	GATAD2B
1.3862e-34	1.62358	0.489	0.221	1.96813e-30	Macaque	POU3F3
5.28853e-31	1.116	0.703	0.565	7.50865e-27	Macaque	AKAP9
1.31319e-30	1.50708	0.232	0.027	1.86446e-26	Macaque	ACVR1C
1.88136e-30	1.87643	0.452	0.141	2.67116e-26	Macaque	NR2F1
5.2047e-30	1.80242	0.373	0.098	7.38963e-26	Macaque	FLRT2
6.93204e-30	1.61986	0.287	0.043	9.8421e-26	Macaque	SLC6A1
6.97591e-30	1.36821	0.563	0.348	9.9044e-26	Macaque	ROBO2
3.37891e-29	1.69708	0.479	0.183	4.79738e-25	Macaque	BMPR2
1.03905e-28	1.36131	0.192	0.017	1.47524e-24	Macaque	ADARB2
4.51015e-28	1.51737	0.405	0.14	6.40352e-24	Macaque	DPYSL5
6.41956e-28	0.839018	0.855	0.812	9.11449e-24	Macaque	RTN4
3.29782e-27	1.43652	0.215	0.017	4.68224e-23	Macaque	ZKSCAN8
3.30581e-27	1.27198	0.722	0.572	4.6936e-23	Macaque	ZEB2
3.66681e-27	1.65788	0.505	0.21	5.20614e-23	Macaque	TBL1XR1
3.98421e-27	1.39689	0.201	0.011	5.65678e-23	Macaque	AZU1
7.2282e-27	1.76646	0.424	0.138	1.02626e-22	Macaque	GSE1
9.9167e-27	1.54946	0.39	0.138	1.40797e-22	Macaque	SETBP1
1.03712e-26	1.376	0.348	0.142	1.4725e-22	Macaque	GSTM3
1.2531e-25	1.39503	0.366	0.152	1.77914e-21	Macaque	DLX6
1.44549e-25	0.836412	0.83	0.801	2.0523e-21	Macaque	NFIB
1.57209e-25	1.48472	0.45	0.198	2.23206e-21	Macaque	NRXN3
2.61195e-25	1.46876	0.454	0.195	3.70845e-21	Macaque	USP22
3.23675e-25	1.50178	0.441	0.197	4.59554e-21	Macaque	CCDC50
3.86211e-25	1.15688	0.736	0.583	5.48342e-21	Macaque	SON
5.14998e-25	1.38913	0.223	0.037	7.31194e-21	Macaque	CDK2AP1
1.34904e-24	1.06073	0.628	0.465	1.91536e-20	Macaque	INA
2.48356e-24	1.06493	0.572	0.405	3.52616e-20	Macaque	NUCKS1
3.34789e-24	1.32024	0.185	0.017	4.75333e-20	Macaque	S100A10
3.49735e-24	1.44675	0.373	0.141	4.96554e-20	Macaque	NAV1
2.68138e-23	1.22332	0.329	0.138	3.80702e-19	Macaque	KDM6B
2.91151e-23	1.4952	0.248	0.054	4.13377e-19	Macaque	SLITRK1
2.99871e-23	1.29118	0.266	0.072	4.25757e-19	Macaque	PANK3
5.41093e-23	0.739227	0.833	0.823	7.68244e-19	Macaque	HNRNPDL
7.23775e-23	1.54364	0.307	0.071	1.02762e-18	Macaque	RC3H1
7.57946e-23	1.26944	0.173	0.014	1.07613e-18	Macaque	IPO11
1.07742e-22	1.30211	0.268	0.079	1.52972e-18	Macaque	ATP9A
1.18465e-22	1.3817	0.359	0.138	1.68197e-18	Macaque	SERINC5
1.20952e-22	1.26181	0.56	0.366	1.71727e-18	Macaque	PRRC2C
2.61888e-22	1.54948	0.243	0.04	3.71828e-18	Macaque	ITGB8
5.18492e-22	1.4613	0.2	0.018	7.36156e-18	Macaque	TGFB2
9.09759e-22	1.341	0.219	0.045	1.29168e-17	Macaque	GRIP1
9.41382e-22	1.28179	0.373	0.182	1.33657e-17	Macaque	MN1
1.8553e-21	1.44104	0.321	0.096	2.63416e-17	Macaque	CASK
1.90651e-21	1.30753	0.568	0.378	2.70686e-17	Macaque	MEX3A
3.67045e-21	1.44282	0.346	0.116	5.2113e-17	Macaque	KANSL1
4.04385e-21	1.03048	0.626	0.49	5.74146e-17	Macaque	DPYSL3
7.92944e-21	1.31841	0.464	0.257	1.12582e-16	Macaque	NFIX
9.62653e-21	1.38356	0.423	0.207	1.36678e-16	Macaque	SYT11
1.14385e-20	1.32988	0.528	0.366	1.62404e-16	Macaque	BCL11A
1.76574e-20	1.02128	0.482	0.345	2.507e-16	Macaque	BPTF
1.77676e-20	1.28307	0.363	0.161	2.52265e-16	Macaque	ARID1A
4.11809e-20	1.01697	0.123	0	5.84686e-16	Macaque	DYNLRB2
6.05226e-20	1.05531	0.575	0.438	8.593e-16	Macaque	DST
7.54361e-20	1.28827	0.528	0.315	1.07104e-15	Macaque	CELF4
9.02135e-20	1.26522	0.552	0.363	1.28085e-15	Macaque	KLF7
1.07906e-19	1.3524	0.267	0.076	1.53205e-15	Macaque	LRP8
2.04983e-19	1.45101	0.353	0.17	2.91035e-15	Macaque	ETV1
3.15171e-19	1.49476	0.273	0.079	4.4748e-15	Macaque	NRP2
3.62693e-19	1.48185	0.342	0.127	5.14951e-15	Macaque	IGF1R
4.54266e-19	1.17818	0.475	0.3	6.44966e-15	Macaque	DYNC1H1
7.2558e-19	1.26137	0.122	0.018	1.03018e-14	Macaque	NME2
8.4865e-19	1.2145	0.437	0.257	1.20491e-14	Macaque	CELF1
1.4529e-18	1.06288	0.402	0.225	2.06283e-14	Macaque	ROMO1
1.55486e-18	1.07943	0.387	0.224	2.20758e-14	Macaque	VEZF1
1.79706e-18	0.665488	0.912	0.867	2.55147e-14	Macaque	MARCKS
4.03295e-18	1.37318	0.118	0.001	5.72598e-14	Macaque	PCDHAC2
5.20777e-18	1.25507	0.381	0.197	7.39399e-14	Macaque	POU2F1
5.72007e-18	0.73071	0.593	0.537	8.12136e-14	Macaque	HNRNPU
1.05254e-17	0.904353	0.106	0.006	1.49439e-13	Macaque	EML6
1.44906e-17	1.19332	0.458	0.264	2.05737e-13	Macaque	GNG2
1.83932e-17	1.02127	0.134	0.019	2.61146e-13	Macaque	CNTNAP5
1.90008e-17	1.12833	0.145	0.009	2.69774e-13	Macaque	FUOM
2.5494e-17	1.05514	0.648	0.53	3.61964e-13	Macaque	DCLK2
2.63508e-17	1.28131	0.116	0.005	3.74128e-13	Macaque	ATP6V0C
2.7336e-17	1.29084	0.361	0.159	3.88117e-13	Macaque	BRD4
2.97101e-17	1.27187	0.413	0.283	4.21823e-13	Macaque	ARRDC3
3.12682e-17	1.18363	0.196	0.041	4.43946e-13	Macaque	MBD5
3.86852e-17	1.25745	0.412	0.225	5.49253e-13	Macaque	TRIM2
3.9106e-17	0.989998	0.122	0.002	5.55227e-13	Macaque	APOBEC3C
4.85468e-17	1.1608	0.365	0.19	6.89267e-13	Macaque	CSNK2A1
5.95922e-17	1.39974	0.3	0.099	8.46089e-13	Macaque	CDV3
6.28177e-17	1.04029	0.186	0.055	8.91886e-13	Macaque	PURB
7.63897e-17	1.17608	0.484	0.31	1.08458e-12	Macaque	MYT1L
8.58902e-17	0.848152	0.547	0.452	1.21947e-12	Macaque	RBFOX2
9.27199e-17	1.03889	0.233	0.1	1.31644e-12	Macaque	TCF3
9.79422e-17	1.21461	0.215	0.059	1.39058e-12	Macaque	FAM171B
9.86953e-17	1.06286	0.589	0.454	1.40128e-12	Macaque	ZNF292
1.15131e-16	0.878927	0.542	0.447	1.63464e-12	Macaque	RSF1
1.29515e-16	1.33901	0.214	0.04	1.83885e-12	Macaque	DPP6
1.44506e-16	1.33244	0.206	0.034	2.0517e-12	Macaque	PELI2
1.55488e-16	0.874051	0.625	0.542	2.20762e-12	Macaque	ANKRD12
1.62576e-16	0.948826	0.138	0.026	2.30825e-12	Macaque	ZCCHC9
1.94459e-16	1.22113	0.263	0.093	2.76093e-12	Macaque	ZNF385D
2.45644e-16	1.21424	0.246	0.075	3.48765e-12	Macaque	TTC28
2.85248e-16	0.964626	0.587	0.466	4.04996e-12	Macaque	ARGLU1
3.0934e-16	1.18178	0.309	0.136	4.39201e-12	Macaque	TCF12
3.13601e-16	1.0539	0.206	0.066	4.4525e-12	Macaque	VANGL2
3.7943e-16	1.22938	0.385	0.196	5.38715e-12	Macaque	GNAO1
4.27077e-16	1.18649	0.455	0.288	6.06364e-12	Macaque	DCLK1
4.69111e-16	1.28522	0.308	0.117	6.66044e-12	Macaque	AUTS2
5.00978e-16	1.32482	0.296	0.116	7.11289e-12	Macaque	ST8SIA2
6.27418e-16	1.21881	0.358	0.158	8.90809e-12	Macaque	CLASP1
7.91744e-16	0.502943	0.915	0.948	1.12412e-11	Macaque	HSP90AA1
8.32543e-16	1.26252	0.328	0.138	1.18204e-11	Macaque	NAV3
8.8257e-16	1.08193	0.17	0.039	1.25307e-11	Macaque	SYT5
8.93194e-16	0.864129	0.101	0.004	1.26816e-11	Macaque	COL4A2
1.10078e-15	1.08012	0.512	0.364	1.56288e-11	Macaque	APC
1.31544e-15	1.03093	0.539	0.394	1.86767e-11	Macaque	TNRC6B
2.15043e-15	1.16405	0.282	0.115	3.05319e-11	Macaque	CREBBP
2.38452e-15	1.03107	0.51	0.361	3.38555e-11	Macaque	DDX6
2.67145e-15	1.30272	0.243	0.067	3.79292e-11	Macaque	SCN3B
2.93749e-15	1.01236	0.191	0.06	4.17064e-11	Macaque	AGO1
2.93805e-15	0.791718	0.336	0.248	4.17144e-11	Macaque	TIA1
3.37867e-15	1.06618	0.163	0.025	4.79704e-11	Macaque	CAPG
5.06714e-15	0.735109	0.544	0.491	7.19432e-11	Macaque	ITM2B
6.87767e-15	1.09112	0.446	0.297	9.76492e-11	Macaque	ERBB4
8.84351e-15	1.08123	0.457	0.291	1.2556e-10	Macaque	TRA2A
8.92604e-15	1.07961	0.465	0.305	1.26732e-10	Macaque	MACF1
9.20373e-15	1.00141	0.16	0.038	1.30675e-10	Macaque	MRPL35
9.67153e-15	1.12736	0.215	0.085	1.37316e-10	Macaque	WRN
1.74385e-14	1.30514	0.369	0.178	2.47591e-10	Macaque	KMT2C
1.75451e-14	1.04512	0.286	0.141	2.49106e-10	Macaque	CAMSAP1
1.92214e-14	1.24444	0.458	0.27	2.72905e-10	Macaque	PAK3
2.00582e-14	1.15824	0.391	0.228	2.84786e-10	Macaque	ANKS1B
2.08404e-14	1.25497	0.159	0.02	2.95891e-10	Macaque	DCC
2.20963e-14	1.22195	0.271	0.107	3.13723e-10	Macaque	RASAL2
3.19044e-14	0.977229	0.193	0.072	4.52978e-10	Macaque	RNF38
3.40398e-14	0.797987	0.552	0.475	4.83297e-10	Macaque	HP1BP3
4.76389e-14	1.04115	0.138	0.016	6.76377e-10	Macaque	CACNA1E
4.84875e-14	1.18041	0.323	0.153	6.88425e-10	Macaque	SREK1
6.33917e-14	0.983329	0.112	0.005	9.00035e-10	Macaque	DCN
6.63208e-14	1.19177	0.444	0.259	9.41623e-10	Macaque	RAB14
7.64535e-14	0.951772	0.468	0.346	1.08549e-09	Macaque	CELF2
8.13119e-14	1.11938	0.252	0.092	1.15447e-09	Macaque	EP300
1.13674e-13	1.15115	0.226	0.076	1.61394e-09	Macaque	MGRN1
1.42458e-13	0.830304	0.593	0.508	2.02262e-09	Macaque	FNBP1L
1.71527e-13	0.96615	0.522	0.386	2.43534e-09	Macaque	MYCBP2
1.79602e-13	0.896336	0.174	0.062	2.54998e-09	Macaque	TSC1
2.0728e-13	0.850684	0.114	0.012	2.94296e-09	Macaque	APCDD1
2.21205e-13	1.0914	0.408	0.261	3.14066e-09	Macaque	CHD3
2.35518e-13	1.06398	0.218	0.076	3.34388e-09	Macaque	SMAD4
2.6831e-13	1.0073	0.18	0.053	3.80946e-09	Macaque	RAP2B
3.81477e-13	1.22905	0.307	0.136	5.41621e-09	Macaque	LCOR
4.92311e-13	0.998597	0.186	0.073	6.98983e-09	Macaque	CTTNBP2
5.11265e-13	0.969296	0.169	0.051	7.25894e-09	Macaque	PCYOX1
5.2973e-13	0.978797	0.147	0.027	7.52111e-09	Macaque	SHANK2
6.21639e-13	1.02329	0.199	0.065	8.82604e-09	Macaque	ZNF134
6.54375e-13	1.1773	0.264	0.101	9.29082e-09	Macaque	KIF21B
7.1156e-13	0.810498	0.12	0.031	1.01027e-08	Macaque	MYO18A
7.29899e-13	1.06993	0.276	0.137	1.03631e-08	Macaque	TNKS
8.667e-13	0.987443	0.191	0.07	1.23054e-08	Macaque	ZSWIM6
8.81732e-13	1.10302	0.341	0.189	1.25188e-08	Macaque	BRD9
9.41632e-13	0.9858	0.41	0.271	1.33693e-08	Macaque	ATCAY
9.42802e-13	1.88475	0.114	0.017	1.33859e-08	Macaque	CCK
1.02809e-12	1.00103	0.148	0.031	1.45968e-08	Macaque	MNT
1.14052e-12	1.00906	0.214	0.089	1.6193e-08	Macaque	MPZL1
1.25146e-12	0.691337	0.326	0.253	1.77682e-08	Macaque	PAFAH1B1
1.48021e-12	1.01856	0.274	0.145	2.1016e-08	Macaque	SRGAP2
1.63589e-12	0.949973	0.177	0.058	2.32263e-08	Macaque	ARHGAP32
1.82443e-12	0.959718	0.161	0.045	2.59032e-08	Macaque	TEAD1
2.21423e-12	0.719513	0.493	0.403	3.14377e-08	Macaque	HNRNPD
2.34857e-12	0.997986	0.14	0.026	3.3345e-08	Macaque	ATP8A2
3.89654e-12	0.948935	0.306	0.186	5.5323e-08	Macaque	ATF7IP
4.18402e-12	0.969958	0.163	0.045	5.94047e-08	Macaque	ABL1
4.49511e-12	0.823293	0.552	0.458	6.38216e-08	Macaque	PAK2
5.34628e-12	1.01048	0.408	0.269	7.59065e-08	Macaque	BEX2
5.77772e-12	0.859528	0.103	0.02	8.20321e-08	Macaque	PCDH17
5.85846e-12	1.04741	0.28	0.132	8.31785e-08	Macaque	ZMIZ1
5.93633e-12	1.05489	0.403	0.246	8.4284e-08	Macaque	BOD1L1
6.13506e-12	1.05061	0.578	0.434	8.71056e-08	Macaque	SRSF11
6.83236e-12	1.1434	0.345	0.19	9.70059e-08	Macaque	MSI2
7.25111e-12	0.67037	0.577	0.54	1.02951e-07	Macaque	RTF1
7.78984e-12	0.940207	0.274	0.151	1.106e-07	Macaque	MSRA
9.16135e-12	1.07401	0.163	0.032	1.30073e-07	Macaque	TNIK
1.00431e-11	1.05581	0.115	0.015	1.42592e-07	Macaque	FGF14
1.05694e-11	0.894894	0.151	0.044	1.50064e-07	Macaque	BRAF
1.14765e-11	0.926402	0.177	0.059	1.62944e-07	Macaque	MXRA8
1.17238e-11	0.988157	0.195	0.072	1.66455e-07	Macaque	FOXJ3
1.21333e-11	0.608464	0.749	0.733	1.72269e-07	Macaque	EIF4G2
1.25556e-11	1.06875	0.344	0.199	1.78265e-07	Macaque	SPTBN1
1.36413e-11	1.18075	0.307	0.138	1.93679e-07	Macaque	TULP4
1.37389e-11	1.04687	0.198	0.058	1.95065e-07	Macaque	DUSP8
1.68004e-11	0.990652	0.191	0.066	2.38532e-07	Macaque	WDFY3
1.77939e-11	1.18865	0.332	0.161	2.52638e-07	Macaque	KDM5A
2.00134e-11	0.645903	0.101	0.033	2.84151e-07	Macaque	ZBTB4
2.03027e-11	0.717002	0.506	0.453	2.88258e-07	Macaque	KIDINS220
2.06783e-11	0.920745	0.209	0.1	2.9359e-07	Macaque	KITLG
2.16827e-11	0.852338	0.126	0.032	3.07852e-07	Macaque	SCN9A
2.29294e-11	0.784042	0.152	0.062	3.25551e-07	Macaque	NOL4L
2.38012e-11	0.986528	0.184	0.061	3.3793e-07	Macaque	APAF1
2.40965e-11	1.01703	0.17	0.046	3.42122e-07	Macaque	MAML3
2.42695e-11	0.977931	0.16	0.043	3.44579e-07	Macaque	CSNK1G1
2.64337e-11	0.748915	0.117	0.039	3.75305e-07	Macaque	ATP2A2
3.07172e-11	0.986284	0.24	0.112	4.36123e-07	Macaque	LITAF
3.08486e-11	1.02248	0.2	0.06	4.37989e-07	Macaque	MDM2
3.19452e-11	0.733973	0.486	0.419	4.53558e-07	Macaque	EPC1
3.28809e-11	0.834697	0.108	0.014	4.66843e-07	Macaque	APOOL
3.95287e-11	0.865379	0.17	0.077	5.61229e-07	Macaque	XPR1
4.06064e-11	0.935033	0.216	0.096	5.7653e-07	Macaque	BRD1
4.27576e-11	1.0228	0.214	0.077	6.07072e-07	Macaque	IRS2
4.55851e-11	1.04299	0.36	0.219	6.47218e-07	Macaque	TCAF1
4.61695e-11	0.904169	0.152	0.048	6.55515e-07	Macaque	SORBS2
4.72437e-11	0.87838	0.493	0.39	6.70766e-07	Macaque	BCLAF1
5.69268e-11	0.923371	0.203	0.087	8.08247e-07	Macaque	ZNF445
5.73858e-11	1.02169	0.212	0.076	8.14764e-07	Macaque	FNDC3A
6.14016e-11	1.06051	0.203	0.073	8.7178e-07	Macaque	POLR2A
6.54194e-11	0.984013	0.17	0.055	9.28825e-07	Macaque	NKAIN2
6.92457e-11	0.892997	0.184	0.07	9.83151e-07	Macaque	PAICS
9.0338e-11	1.11911	0.116	0.024	1.28262e-06	Macaque	TMEFF1
9.2097e-11	1.00761	0.318	0.188	1.30759e-06	Macaque	CTNNB1
1.10394e-10	0.8785	0.618	0.541	1.56737e-06	Macaque	CEP170
1.15724e-10	1.00888	0.22	0.098	1.64304e-06	Macaque	NUP93
1.23916e-10	0.969515	0.281	0.154	1.75936e-06	Macaque	CLIP3
1.24498e-10	1.05728	0.274	0.132	1.76763e-06	Macaque	TNRC6A
1.25359e-10	1.0847	0.321	0.169	1.77984e-06	Macaque	AKT3
1.29959e-10	1.10967	0.282	0.134	1.84516e-06	Macaque	ZNF608
1.32514e-10	0.740771	0.48	0.408	1.88144e-06	Macaque	TMEM258
1.35929e-10	1.08126	0.231	0.087	1.92991e-06	Macaque	MED13L
1.43463e-10	0.951178	0.152	0.041	2.03689e-06	Macaque	AGO4
1.43888e-10	1.10877	0.201	0.069	2.04292e-06	Macaque	SIPA1L2
1.62752e-10	0.849074	0.185	0.085	2.31075e-06	Macaque	PTBP3
1.80605e-10	0.934308	0.19	0.069	2.56423e-06	Macaque	ZNF609
1.86228e-10	0.937808	0.15	0.04	2.64407e-06	Macaque	MAP6
1.92279e-10	0.828185	0.149	0.049	2.72998e-06	Macaque	IRGQ
2.19904e-10	1.09121	0.279	0.128	3.1222e-06	Macaque	NCAN
2.46677e-10	0.659305	0.103	0.035	3.50232e-06	Macaque	CCNT1
2.53219e-10	0.756656	0.478	0.4	3.5952e-06	Macaque	CCDC112
2.54288e-10	0.714136	0.124	0.039	3.61038e-06	Macaque	TTL
2.5542e-10	1.33615	0.28	0.137	3.62645e-06	Macaque	CHD2
2.56182e-10	0.878843	0.136	0.035	3.63727e-06	Macaque	UBE2V1
2.61796e-10	0.907582	0.156	0.047	3.71697e-06	Macaque	NCOA3
2.9352e-10	0.453479	0.853	0.875	4.1674e-06	Macaque	HSP90AB1
3.25962e-10	0.95577	0.399	0.284	4.628e-06	Macaque	DHX36
3.35687e-10	0.642898	0.142	0.074	4.76609e-06	Macaque	NUFIP2
3.53252e-10	0.88548	0.114	0.016	5.01547e-06	Macaque	FANCM
3.67583e-10	0.952793	0.169	0.053	5.21895e-06	Macaque	CPEB4
3.85002e-10	0.887239	0.162	0.057	5.46625e-06	Macaque	AGFG1
3.87014e-10	0.951474	0.174	0.057	5.49482e-06	Macaque	GABBR1
4.06002e-10	1.00732	0.167	0.047	5.76441e-06	Macaque	DYRK1A
5.73435e-10	1.0231	0.273	0.144	8.14163e-06	Macaque	ASXL3
6.14089e-10	0.898126	0.317	0.195	8.71883e-06	Macaque	ATG12
6.65511e-10	0.942051	0.251	0.129	9.44892e-06	Macaque	KIAA1549
7.02372e-10	0.981505	0.246	0.119	9.97228e-06	Macaque	PPFIBP1
7.64217e-10	0.911133	0.161	0.053	1.08504e-05	Macaque	PHC3
7.76328e-10	0.782174	0.385	0.292	1.10223e-05	Macaque	NONO
8.03628e-10	0.792061	0.131	0.04	1.14099e-05	Macaque	SCAF8
8.60469e-10	0.913034	0.226	0.118	1.22169e-05	Macaque	UBE2K
9.25228e-10	0.837679	0.336	0.247	1.31364e-05	Macaque	ZNF148
9.37166e-10	1.0164	0.221	0.09	1.33059e-05	Macaque	LAGE3
1.01594e-09	0.989805	0.412	0.281	1.44244e-05	Macaque	EFNB2
1.04467e-09	0.966875	0.225	0.096	1.48323e-05	Macaque	ELMO1
1.07517e-09	0.909405	0.203	0.086	1.52652e-05	Macaque	NOVA2
1.09292e-09	0.84834	0.373	0.273	1.55173e-05	Macaque	BZW1
1.10089e-09	0.92321	0.299	0.177	1.56305e-05	Macaque	ADNP
1.67844e-09	0.950474	0.48	0.354	2.38305e-05	Macaque	YTHDC1
1.72139e-09	0.831888	0.586	0.512	2.44403e-05	Macaque	TRA2B
1.84405e-09	1.07937	0.273	0.132	2.61819e-05	Macaque	IRF2BP2
1.84516e-09	0.907003	0.433	0.331	2.61976e-05	Macaque	PRPF4B
2.08301e-09	1.07546	0.261	0.147	2.95745e-05	Macaque	GRIA2
2.09223e-09	1.05479	0.153	0.061	2.97054e-05	Macaque	RNASEK
2.23664e-09	0.922686	0.229	0.118	3.17558e-05	Macaque	KIF3C
2.24087e-09	0.839905	0.18	0.082	3.18158e-05	Macaque	CORO2B
2.28857e-09	0.791548	0.1	0.011	3.24931e-05	Macaque	CNTN2
2.43594e-09	0.817109	0.258	0.164	3.45855e-05	Macaque	CSNK1G3
2.679e-09	0.945023	0.262	0.149	3.80365e-05	Macaque	DICER1
2.85311e-09	0.871345	0.206	0.1	4.05084e-05	Macaque	FBXW11
3.0042e-09	0.752033	0.262	0.195	4.26537e-05	Macaque	ACIN1
3.05834e-09	0.941406	0.294	0.159	4.34223e-05	Macaque	KLF13
3.15964e-09	0.946584	0.223	0.097	4.48606e-05	Macaque	ETNK1
3.18719e-09	0.798746	0.109	0.016	4.52517e-05	Macaque	ADNP2
3.20143e-09	0.878194	0.173	0.068	4.5454e-05	Macaque	CBLB
3.267e-09	1.01013	0.233	0.111	4.63849e-05	Macaque	WNK1
3.28923e-09	0.867593	0.193	0.086	4.67005e-05	Macaque	SATB1
3.39133e-09	1.04446	0.28	0.149	4.81501e-05	Macaque	GSK3B
3.45137e-09	0.902607	0.128	0.029	4.90025e-05	Macaque	LRRC3B
3.78192e-09	0.890486	0.218	0.111	5.36957e-05	Macaque	CLIC4
3.82064e-09	1.04723	0.227	0.098	5.42455e-05	Macaque	HIPK2
4.31489e-09	0.760125	0.411	0.291	6.12628e-05	Macaque	GNAI2
4.78428e-09	0.902693	0.201	0.09	6.79273e-05	Macaque	NRIP1
4.93654e-09	0.907584	0.233	0.114	7.00889e-05	Macaque	FAM171A2
5.2829e-09	0.731753	0.135	0.051	7.50067e-05	Macaque	ARNT2
5.69069e-09	0.929567	0.161	0.048	8.07964e-05	Macaque	YTHDF3
5.88621e-09	0.787124	0.423	0.342	8.35724e-05	Macaque	RBM25
5.91563e-09	0.718434	0.1	0.02	8.399e-05	Macaque	STX1B
6.13558e-09	0.805783	0.232	0.14	8.71129e-05	Macaque	SENP6
6.91194e-09	0.64876	0.563	0.528	9.81358e-05	Macaque	EIF5
7.09728e-09	0.936501	0.168	0.064	0.000100767	Macaque	PRKACB
7.15837e-09	0.968136	0.224	0.098	0.000101634	Macaque	TGOLN2
7.59929e-09	0.805588	0.587	0.518	0.000107895	Macaque	RERE
7.72276e-09	0.744276	0.356	0.279	0.000109648	Macaque	MAGI1
7.81686e-09	0.739977	0.156	0.071	0.000110984	Macaque	KDM2A
8.33706e-09	0.75983	0.159	0.076	0.00011837	Macaque	RYBP
8.387e-09	0.704997	0.109	0.031	0.000119079	Macaque	MEIS1
8.45132e-09	0.888041	0.177	0.085	0.000119992	Macaque	SOX5
8.50992e-09	0.920425	0.374	0.27	0.000120824	Macaque	ANK2
9.04309e-09	0.752458	0.11	0.032	0.000128394	Macaque	SCN8A
1.00033e-08	0.976225	0.197	0.076	0.000142028	Macaque	USP7
1.04597e-08	0.659128	0.323	0.265	0.000148506	Macaque	RAD21
1.04608e-08	1.03592	0.286	0.155	0.000148522	Macaque	HMBOX1
1.10976e-08	0.934423	0.419	0.299	0.000157563	Macaque	KIF1B
1.11094e-08	0.830971	0.13	0.034	0.000157731	Macaque	FAM168A
1.19773e-08	0.974439	0.24	0.111	0.000170053	Macaque	ARHGAP35
1.20318e-08	0.853442	0.155	0.054	0.000170827	Macaque	LATS1
1.2179e-08	0.85697	0.176	0.077	0.000172917	Macaque	DYNLL2
1.22342e-08	0.969314	0.366	0.25	0.000173701	Macaque	ABI2
1.28278e-08	1.07363	0.19	0.049	0.000182129	Macaque	NFAT5
1.30384e-08	0.705007	0.129	0.05	0.000185119	Macaque	OSBPL11
1.35257e-08	0.82104	0.422	0.335	0.000192038	Macaque	PBRM1
1.38047e-08	0.896048	0.163	0.055	0.000196	Macaque	PITPNC1
1.43813e-08	0.710676	0.136	0.045	0.000204185	Macaque	CD99
1.50761e-08	0.51734	0.614	0.637	0.00021405	Macaque	SH3BGRL3
1.65633e-08	0.79266	0.127	0.041	0.000235166	Macaque	MED1
1.69659e-08	1.09706	0.227	0.082	0.000240882	Macaque	ATN1
1.71242e-08	0.812102	0.724	0.725	0.000243129	Macaque	SOX2
1.81514e-08	0.864559	0.481	0.365	0.000257713	Macaque	ARL4C
1.83876e-08	0.741086	0.156	0.079	0.000261067	Macaque	MAPRE2
2.29099e-08	0.779314	0.121	0.036	0.000325275	Macaque	TRIB2
2.3836e-08	0.859279	0.219	0.105	0.000338424	Macaque	COX19
2.50659e-08	0.559454	0.613	0.611	0.000355886	Macaque	HDAC2
2.61065e-08	0.691073	0.127	0.048	0.00037066	Macaque	PPM1L
2.61195e-08	0.881044	0.241	0.139	0.000370844	Macaque	ENOX1
2.61511e-08	0.77817	0.153	0.072	0.000371293	Macaque	MIB1
2.89009e-08	0.912835	0.287	0.177	0.000410335	Macaque	TSC22D2
2.89981e-08	0.975978	0.216	0.093	0.000411715	Macaque	RPRD2
3.28965e-08	0.622066	0.129	0.06	0.000467064	Macaque	GMPS
3.29041e-08	0.722325	0.103	0.024	0.000467172	Macaque	SEH1L
3.66878e-08	1.08342	0.296	0.157	0.000520893	Macaque	RBM26
3.68201e-08	0.913799	0.196	0.093	0.000522772	Macaque	SLC1A2
3.89885e-08	0.904213	0.27	0.164	0.000553558	Macaque	PRDM2
3.9003e-08	0.822672	0.204	0.107	0.000553764	Macaque	SMNDC1
3.91799e-08	0.986249	0.18	0.067	0.000556276	Macaque	STC1
4.0214e-08	0.510632	0.118	0.073	0.000570959	Macaque	RALGAPA2
4.33203e-08	0.673266	0.105	0.04	0.000615061	Macaque	HNRNPUL2
4.54768e-08	0.942003	0.168	0.056	0.00064568	Macaque	TET3
4.63621e-08	0.803357	0.154	0.061	0.000658249	Macaque	NCOR2
4.69259e-08	0.611083	0.115	0.05	0.000666254	Macaque	IGSF21
4.85952e-08	0.696657	0.131	0.052	0.000689954	Macaque	CASP2
5.33766e-08	0.726656	0.126	0.039	0.000757841	Macaque	ZMIZ2
5.50102e-08	0.575572	0.602	0.599	0.000781035	Macaque	ATRX
5.85069e-08	0.796024	0.345	0.263	0.00083068	Macaque	KDM5B
6.34386e-08	0.771824	0.115	0.024	0.000900701	Macaque	KMT2D
6.50325e-08	0.98422	0.173	0.058	0.000923331	Macaque	YEATS2
6.51061e-08	0.647968	0.12	0.06	0.000924376	Macaque	EIF4G3
6.53358e-08	0.861053	0.264	0.177	0.000927637	Macaque	CAMK4
6.80204e-08	1.01702	0.12	0.028	0.000965753	Macaque	HYPK
6.93936e-08	0.792722	0.228	0.131	0.00098525	Macaque	ZNF451
7.9335e-08	0.688759	0.578	0.58	0.0011264	Macaque	ELAVL3
8.0331e-08	0.744055	0.146	0.051	0.00114054	Macaque	MED23
9.12414e-08	0.858283	0.136	0.039	0.00129545	Macaque	UNC79
9.37177e-08	0.734939	0.134	0.05	0.0013306	Macaque	ANKRD28
9.52071e-08	0.944632	0.16	0.046	0.00135175	Macaque	AKNA
1.00739e-07	0.782571	0.132	0.05	0.00143029	Macaque	RAB30
1.07619e-07	0.788673	0.149	0.067	0.00152797	Macaque	TRIP12
1.10896e-07	0.835719	0.162	0.067	0.00157451	Macaque	YLPM1
1.1978e-07	0.71276	0.182	0.107	0.00170064	Macaque	GNPTAB
1.36378e-07	0.975868	0.171	0.058	0.0019363	Macaque	SESN3
1.42739e-07	0.882825	0.404	0.291	0.00202661	Macaque	DDX18
1.50411e-07	0.710593	0.137	0.053	0.00213554	Macaque	SIN3A
1.52008e-07	0.75443	0.19	0.106	0.00215821	Macaque	PRKAR2B
1.55167e-07	0.869695	0.154	0.05	0.00220306	Macaque	SDK2
1.56828e-07	0.655373	0.133	0.072	0.00222664	Macaque	STRN3
1.61779e-07	0.644436	0.101	0.033	0.00229694	Macaque	FTO
1.66268e-07	0.589899	0.113	0.052	0.00236067	Macaque	TNPO2
1.71376e-07	0.777634	0.127	0.037	0.0024332	Macaque	AEBP2
1.75811e-07	0.823255	0.252	0.166	0.00249617	Macaque	ZNF462
1.76422e-07	0.749734	0.462	0.383	0.00250484	Macaque	KMT2A
1.79116e-07	0.640392	0.106	0.039	0.00254309	Macaque	PHRF1
1.81175e-07	0.710106	0.196	0.118	0.00257232	Macaque	CSPP1
1.84875e-07	0.594402	0.542	0.528	0.00262485	Macaque	RSRC2
1.95171e-07	0.770806	0.212	0.119	0.00277103	Macaque	TCERG1
2.15207e-07	0.81232	0.39	0.322	0.0030555	Macaque	ANKRD11
2.57119e-07	0.692983	0.174	0.104	0.00365058	Macaque	SSBP3
2.62712e-07	0.814238	0.223	0.129	0.00372999	Macaque	NRXN2
2.78275e-07	0.745823	0.145	0.055	0.00395095	Macaque	GPI
2.8154e-07	0.920754	0.307	0.201	0.00399731	Macaque	CPLX2
2.82959e-07	0.945643	0.214	0.101	0.00401745	Macaque	SMU1
2.85437e-07	0.67934	0.536	0.454	0.00405263	Macaque	HNRNPH1
2.93275e-07	0.813103	0.152	0.057	0.00416392	Macaque	OGT
2.94576e-07	0.778949	0.251	0.169	0.00418239	Macaque	KLHL24
3.03962e-07	0.605995	0.105	0.041	0.00431566	Macaque	TRMT10B
3.05108e-07	0.777595	0.45	0.373	0.00433193	Macaque	NAP1L4
3.25521e-07	0.791795	0.115	0.028	0.00462175	Macaque	METTL21A
3.3123e-07	0.81525	0.316	0.237	0.00470281	Macaque	HSP90B1
3.31633e-07	0.681422	0.111	0.035	0.00470852	Macaque	PIP5K1B
3.68776e-07	0.815151	0.218	0.119	0.00523588	Macaque	DNMT3A
4.04528e-07	1.08576	0.269	0.125	0.00574348	Macaque	RBM33
4.07175e-07	0.775591	0.396	0.318	0.00578106	Macaque	RNMT
4.10808e-07	0.769664	0.152	0.062	0.00583265	Macaque	POP5
4.15758e-07	0.820624	0.189	0.102	0.00590293	Macaque	TSPYL4
4.19113e-07	0.710829	0.111	0.051	0.00595057	Macaque	PSMA6
4.74425e-07	0.73241	0.159	0.075	0.00673589	Macaque	CDK13
4.75268e-07	0.778376	0.156	0.072	0.00674786	Macaque	DCBLD2
4.79558e-07	0.630184	0.107	0.039	0.00680876	Macaque	CRTC1
4.87308e-07	1.06649	0.24	0.107	0.00691879	Macaque	ZNF532
4.90855e-07	1.02408	0.482	0.393	0.00696916	Macaque	CCND2
5.0997e-07	0.761446	0.248	0.181	0.00724056	Macaque	TNRC6C
5.18549e-07	0.801656	0.185	0.088	0.00736236	Macaque	ACBD3
5.79948e-07	0.69477	0.109	0.028	0.00823411	Macaque	BCR
5.92075e-07	0.855868	0.141	0.037	0.00840628	Macaque	RAPGEF2
6.16378e-07	0.693311	0.174	0.101	0.00875133	Macaque	CDK12
6.58332e-07	0.683691	0.194	0.127	0.00934699	Macaque	TTF1
6.6082e-07	0.229032	0.966	0.991	0.00938233	Macaque	MAP1B
6.90021e-07	0.831035	0.24	0.146	0.00979692	Macaque	CD200
2.05297e-214	5.01839	0.998	0.102	2.9148e-210	Human	ACTB
4.85334e-187	2.6465	1	0.592	6.89078e-183	Human	EEF1A1
7.02021e-183	2.50896	0.996	0.598	9.96729e-179	Human	FTH1
1.27566e-147	2.23844	0.985	0.43	1.81119e-143	Human	YBX1
9.90186e-137	2.35146	0.947	0.322	1.40587e-132	Human	HNRNPA1
2.08932e-125	1.79671	0.977	0.498	2.96642e-121	Human	FTL
7.41051e-124	1.59177	0.987	0.68	1.05214e-119	Human	MARCKSL1
2.65205e-123	1.79481	0.992	0.615	3.76538e-119	Human	PTMA
2.44102e-118	2.15707	0.901	0.28	3.46576e-114	Human	NNAT
9.7234e-110	1.76905	0.917	0.37	1.38053e-105	Human	BTF3
4.07545e-104	1.94611	0.87	0.255	5.78632e-100	Human	COX7C
2.58913e-99	1.83414	0.89	0.356	3.67605e-95	Human	RBP1
8.39596e-96	1.8853	0.814	0.222	1.19206e-91	Human	PPIA
4.76035e-78	1.30173	0.866	0.37	6.75874e-74	Human	CHCHD2
6.07053e-77	1.74209	0.766	0.152	8.61894e-73	Human	TUBA1B
2.90755e-73	1.86095	0.473	0.036	4.12813e-69	Human	LDHB
5.51966e-72	1.26317	0.945	0.583	7.83681e-68	Human	HMGN2
2.46961e-69	1.56326	0.601	0.092	3.50635e-65	Human	MZT2B
1.1452e-68	0.809492	1	0.955	1.62595e-64	Human	TUBA1A
1.17877e-68	1.60113	0.523	0.073	1.67362e-64	Human	EEF1D
2.19983e-64	1.0622	0.977	0.619	3.12332e-60	Human	TPT1
9.14149e-64	1.35999	0.801	0.33	1.29791e-59	Human	PEBP1
2.91511e-62	1.51235	0.639	0.149	4.13888e-58	Human	VAMP2
4.13298e-62	1.76581	0.376	0.003	5.86801e-58	Human	NLRP1
1.30067e-58	1.39386	0.766	0.286	1.84669e-54	Human	EEF2
1.17366e-57	1.17279	0.908	0.478	1.66636e-53	Human	GAPDH
2.80665e-55	1.4276	0.709	0.214	3.98488e-51	Human	NPM1
1.28143e-51	1.42714	0.477	0.08	1.81937e-47	Human	COX7A2L
2.3071e-50	0.858767	0.973	0.818	3.27562e-46	Human	BTG1
7.07732e-50	0.987969	0.785	0.401	1.00484e-45	Human	TMA7
1.88478e-47	1.41284	0.321	0.017	2.67601e-43	Human	TSPO
2.0406e-47	1.11994	0.664	0.27	2.89724e-43	Human	TMEM123
5.28023e-44	1.15851	0.316	0.042	7.49688e-40	Human	EMC4
6.65149e-44	1.13855	0.651	0.242	9.44378e-40	Human	UQCRB
7.72391e-44	0.972027	0.848	0.473	1.09664e-39	Human	CIRBP
1.44267e-43	1.18087	0.79	0.351	2.04831e-39	Human	MYL6
5.93863e-43	1.37548	0.276	0.005	8.43166e-39	Human	PGAM1
1.65774e-42	0.718242	0.982	0.732	2.35365e-38	Human	FAU
2.2316e-41	1.35994	0.383	0.037	3.16843e-37	Human	SPSB3
2.92031e-41	0.854313	0.936	0.648	4.14625e-37	Human	MLLT11
2.17923e-40	0.372926	0.574	0.162	3.09406e-36	Human	HSPA1A
2.2463e-40	1.09902	0.58	0.197	3.1893e-36	Human	SSR2
1.67365e-39	1.16055	0.692	0.238	2.37624e-35	Human	EEF1B2
4.44215e-39	0.991351	0.435	0.1	6.30697e-35	Human	SRSF9
9.9714e-38	1.1844	0.508	0.127	1.41574e-33	Human	RPAIN
1.74692e-37	1.05583	0.513	0.138	2.48027e-33	Human	HSPE1
1.80986e-37	1.13817	0.321	0.039	2.56964e-33	Human	ALDOA
1.52563e-34	1.04267	0.296	0.031	2.16609e-30	Human	PRELID1
1.66897e-34	0.863644	0.626	0.268	2.3696e-30	Human	GPX4
9.27474e-34	0.65389	0.89	0.384	1.31683e-29	Human	UBB
1.12225e-33	0.85027	0.729	0.321	1.59338e-29	Human	UQCRH
7.01291e-33	1.38696	0.407	0.062	9.95693e-29	Human	UXT
5.58958e-32	1.01782	0.251	0.028	7.93608e-28	Human	AP3S1
5.22843e-31	0.922079	0.524	0.176	7.42333e-27	Human	GAP43
8.11372e-31	1.21436	0.253	0.022	1.15199e-26	Human	RPRM
1.40977e-30	0.627944	0.981	0.776	2.00159e-26	Human	NACA
2.6985e-30	0.954097	0.407	0.109	3.83133e-26	Human	NDUFB8
5.46192e-30	0.71968	0.77	0.412	7.75483e-26	Human	NDUFA4
2.23443e-29	0.909891	0.612	0.265	3.17244e-25	Human	TBCA
2.57939e-29	0.955585	0.264	0.047	3.66222e-25	Human	ERP29
1.25287e-28	0.763398	0.778	0.445	1.77883e-24	Human	DLX5
1.79687e-28	0.693632	0.577	0.268	2.5512e-24	Human	SUMO1
3.45101e-28	0.886712	0.454	0.153	4.89975e-24	Human	SNRPF
7.20774e-28	0.584034	0.796	0.479	1.02335e-23	Human	DDAH2
2.28453e-27	1.15901	0.316	0.039	3.24358e-23	Human	GPX1
2.62902e-27	1.08114	0.211	0.009	3.73269e-23	Human	PRKX
3.99285e-27	0.861323	0.405	0.125	5.66905e-23	Human	ZNF91
1.1231e-26	0.724527	0.646	0.321	1.59458e-22	Human	COX6B1
1.15456e-26	0.690714	0.368	0.09	1.63925e-22	Human	PCBP1
1.40286e-26	0.905054	0.508	0.181	1.99178e-22	Human	RCN2
2.66449e-26	0.911313	0.617	0.254	3.78304e-22	Human	EIF3L
3.11534e-26	0.964362	0.154	0	4.42316e-22	Human	BEX5
3.83166e-26	0.603536	0.925	0.645	5.44019e-22	Human	SUMO2
4.1903e-26	0.796671	0.615	0.267	5.94939e-22	Human	ERH
8.20151e-26	0.814502	0.801	0.454	1.16445e-21	Human	COX7A2
3.93879e-25	1.22713	0.319	0.074	5.59229e-21	Human	FOS
4.37195e-25	0.931829	0.192	0.011	6.2073e-21	Human	ERV3-1
5.25033e-25	0.859871	0.294	0.054	7.45442e-21	Human	POLR2K
9.25635e-25	0.884101	0.533	0.201	1.31422e-20	Human	FABP5
1.93686e-24	0.725704	0.395	0.137	2.74996e-20	Human	SNRPG
2.44309e-24	0.82442	0.795	0.446	3.46871e-20	Human	COMMD6
3.0798e-24	0.761325	0.23	0.037	4.37271e-20	Human	ARL2BP
5.49244e-24	0.69543	0.873	0.538	7.79816e-20	Human	CKB
5.69948e-24	0.412356	0.998	0.948	8.09213e-20	Human	TUBB2B
7.16418e-24	0.885479	0.28	0.049	1.01717e-19	Human	NUDT3
9.04338e-24	0.784486	0.61	0.281	1.28398e-19	Human	NDUFB11
9.94727e-24	0.481496	0.817	0.493	1.41231e-19	Human	SLC25A6
1.32e-23	0.780685	0.337	0.093	1.87413e-19	Human	DTD1
1.50349e-23	0.785559	0.42	0.149	2.13466e-19	Human	GUK1
1.73703e-23	0.741293	0.218	0.038	2.46623e-19	Human	AK1
3.56918e-23	0.757945	0.145	0.009	5.06752e-19	Human	RDH11
3.8592e-23	0.655928	0.236	0.069	5.47929e-19	Human	ARL6IP6
3.89001e-23	0.652341	0.403	0.159	5.52303e-19	Human	ESD
6.85911e-23	0.770121	0.241	0.06	9.73857e-19	Human	SNRPC
7.54443e-23	0.996816	0.334	0.074	1.07116e-18	Human	CPE
1.83174e-22	0.692741	0.336	0.113	2.60071e-18	Human	PFN1
1.91196e-22	0.692962	0.539	0.239	2.7146e-18	Human	PCSK1N
2.05018e-22	0.931451	0.461	0.132	2.91085e-18	Human	PRDX1
2.31611e-22	0.7914	0.213	0.046	3.28842e-18	Human	KLF6
3.09914e-22	0.769737	0.174	0.021	4.40016e-18	Human	FAM229B
4.02324e-22	0.704098	0.513	0.231	5.71219e-18	Human	GSTA4
4.78153e-22	0.786122	0.336	0.102	6.78882e-18	Human	OCIAD2
1.14103e-21	0.769292	0.152	0.012	1.62004e-17	Human	SBDS
1.20747e-21	0.737907	0.577	0.265	1.71437e-17	Human	SOD1
1.42738e-21	0.747882	0.239	0.053	2.0266e-17	Human	ZNF821
2.01881e-21	0.916059	0.238	0.034	2.8663e-17	Human	UBE2L6
2.32074e-21	0.577781	0.568	0.278	3.29499e-17	Human	TAGLN3
3.22615e-21	0.719665	0.483	0.198	4.58049e-17	Human	N4BP2L2
4.74668e-21	0.600244	0.364	0.159	6.73933e-17	Human	ETFB
6.9983e-21	0.622885	0.507	0.215	9.93618e-17	Human	LAMTOR5
1.38278e-20	0.513022	0.74	0.428	1.96327e-16	Human	DNAJB6
2.30653e-20	0.642865	0.659	0.339	3.27481e-16	Human	FXYD6
2.89541e-20	0.64736	0.344	0.116	4.1109e-16	Human	EIF3I
4.76169e-20	0.831439	0.487	0.19	6.76064e-16	Human	CARHSP1
6.62614e-20	0.667376	0.388	0.142	9.40779e-16	Human	DHPS
7.26623e-20	0.768447	0.287	0.073	1.03166e-15	Human	NDUFV2
7.32611e-20	0.770476	0.124	0	1.04016e-15	Human	IFI44
8.49945e-20	0.867701	0.229	0.047	1.20675e-15	Human	PEA15
1.17399e-19	0.787211	0.18	0.024	1.66683e-15	Human	CROCC
1.83176e-19	0.696235	0.272	0.075	2.60073e-15	Human	IGFBP2
1.85296e-19	0.642619	0.161	0.027	2.63084e-15	Human	VOPP1
2.18466e-19	0.586859	0.324	0.123	3.10178e-15	Human	TPI1
2.24066e-19	0.788432	0.128	0.002	3.18129e-15	Human	S100A6
2.39604e-19	0.859058	0.223	0.038	3.4019e-15	Human	ZNF397
5.09037e-19	0.953528	0.432	0.15	7.22731e-15	Human	NAP1L1
5.8485e-19	0.717326	0.121	0.002	8.3037e-15	Human	AKR1C1
7.18199e-19	0.710255	0.276	0.08	1.0197e-14	Human	COMMD2
8.20652e-19	0.622266	0.189	0.038	1.16516e-14	Human	CAP1
9.01486e-19	0.789473	0.163	0.015	1.27993e-14	Human	NDUFB3
1.17034e-18	0.713513	0.166	0.024	1.66165e-14	Human	ACADM
1.38426e-18	0.686424	0.353	0.123	1.96537e-14	Human	MED10
2.72018e-18	0.730892	0.193	0.029	3.86211e-14	Human	GOLGA7
2.78341e-18	0.722796	0.23	0.055	3.95189e-14	Human	WLS
2.82478e-18	0.330955	0.957	0.786	4.01063e-14	Human	CCNI
2.86153e-18	0.582331	0.3	0.111	4.0628e-14	Human	CUEDC2
3.06563e-18	0.443143	0.676	0.39	4.35258e-14	Human	ATP6V1G1
3.49427e-18	0.615774	0.222	0.064	4.96117e-14	Human	MICU1
3.51769e-18	0.665593	0.177	0.028	4.99442e-14	Human	NKIRAS2
3.5748e-18	0.708774	0.122	0.003	5.0755e-14	Human	HES4
3.6394e-18	0.745456	0.283	0.088	5.16722e-14	Human	PHB2
3.71513e-18	0.670962	0.546	0.262	5.27475e-14	Human	EIF3E
4.00683e-18	0.75836	0.233	0.038	5.6889e-14	Human	SUPT4H1
4.03295e-18	0.645733	0.1	0.001	5.72598e-14	Human	IFI16
5.05589e-18	0.348013	0.998	0.958	7.17835e-14	Human	STMN2
5.06102e-18	0.51091	0.709	0.406	7.18564e-14	Human	PPDPF
5.24135e-18	0.62754	0.141	0.016	7.44167e-14	Human	CHMP4A
5.33134e-18	0.560333	0.298	0.113	7.56944e-14	Human	DGUOK
5.36589e-18	0.697468	0.422	0.162	7.61849e-14	Human	UPF3A
8.89551e-18	0.623144	0.516	0.237	1.26298e-13	Human	ST13
8.98143e-18	0.595184	0.195	0.047	1.27518e-13	Human	LEPROT
9.60038e-18	0.764352	0.152	0.01	1.36306e-13	Human	NENF
1.10177e-17	0.560486	0.801	0.511	1.56429e-13	Human	HMGN1
1.1335e-17	0.740365	0.202	0.043	1.60934e-13	Human	SFRP1
1.18785e-17	0.62623	0.156	0.021	1.68651e-13	Human	ARL16
1.28297e-17	0.708675	0.134	0.01	1.82156e-13	Human	PUS7L
1.29022e-17	0.566882	0.371	0.154	1.83186e-13	Human	TMBIM6
1.73969e-17	0.703957	0.295	0.092	2.47002e-13	Human	CYCS
2.19446e-17	0.657529	0.167	0.03	3.1157e-13	Human	IDI1
3.51481e-17	0.767147	0.27	0.074	4.99033e-13	Human	PRKCA
5.08922e-17	0.490713	0.833	0.51	7.22567e-13	Human	PFDN5
6.24202e-17	0.663896	0.126	0.01	8.86242e-13	Human	RARS2
1.21019e-16	0.566509	0.183	0.052	1.71823e-12	Human	DNER
1.30536e-16	0.493011	0.237	0.074	1.85335e-12	Human	PDCD6
1.35243e-16	0.61758	0.251	0.078	1.92018e-12	Human	PSMB3
1.46171e-16	0.458198	0.525	0.275	2.07534e-12	Human	COX5B
1.55021e-16	0.497652	0.215	0.074	2.20099e-12	Human	CMPK1
2.01828e-16	0.834592	0.403	0.129	2.86556e-12	Human	ILF2
2.2776e-16	0.673522	0.134	0.012	3.23374e-12	Human	FEZ2
2.52719e-16	0.581162	0.108	0.008	3.5881e-12	Human	ARMCX6
2.63652e-16	0.724188	0.165	0.021	3.74333e-12	Human	NHLRC3
2.98861e-16	0.610641	0.136	0.021	4.24323e-12	Human	COQ7
3.57274e-16	0.508341	0.917	0.74	5.07258e-12	Human	CFL1
3.59939e-16	0.555539	0.233	0.077	5.11041e-12	Human	SLC25A5
3.6887e-16	0.62522	0.492	0.233	5.23721e-12	Human	PRDX5
4.3922e-16	0.516441	0.61	0.319	6.23604e-12	Human	MYL12B
4.84922e-16	0.683868	0.208	0.037	6.88492e-12	Human	COMMD7
6.54238e-16	0.805257	0.208	0.035	9.28887e-12	Human	PDZRN4
7.22327e-16	0.636355	0.14	0.021	1.02556e-11	Human	DCK
7.42067e-16	0.754133	0.137	0.006	1.05359e-11	Human	DLL3
9.09786e-16	0.503641	0.681	0.403	1.29171e-11	Human	WSB1
9.62716e-16	0.669604	0.257	0.063	1.36686e-11	Human	CRBN
1.1919e-15	0.465375	0.432	0.201	1.69226e-11	Human	CHMP5
1.22414e-15	0.739492	0.248	0.068	1.73804e-11	Human	TMTC4
1.3313e-15	0.722767	0.223	0.05	1.89018e-11	Human	ORMDL1
1.39122e-15	0.568679	0.157	0.035	1.97525e-11	Human	CST3
1.51008e-15	0.699914	0.258	0.071	2.14402e-11	Human	CSRP2
1.62336e-15	0.498268	0.184	0.052	2.30485e-11	Human	FDPS
1.82762e-15	0.702502	0.246	0.058	2.59485e-11	Human	CHL1
2.22018e-15	0.502709	0.744	0.403	3.15221e-11	Human	COX4I1
2.39033e-15	0.5836	0.447	0.152	3.39379e-11	Human	EIF4A1
2.39093e-15	0.495687	0.307	0.132	3.39465e-11	Human	SERP1
2.82404e-15	0.597467	0.277	0.07	4.00957e-11	Human	NPDC1
3.02353e-15	0.560997	0.582	0.303	4.2928e-11	Human	LSM7
3.13722e-15	0.747416	0.312	0.128	4.45422e-11	Human	IER2
3.42395e-15	0.606018	0.204	0.05	4.86132e-11	Human	GNG3
3.43477e-15	0.595726	0.249	0.069	4.87668e-11	Human	PSMC1
3.9071e-15	0.546062	0.865	0.625	5.5473e-11	Human	CALM2
3.95875e-15	0.58034	0.194	0.043	5.62063e-11	Human	MPC2
5.28804e-15	0.398483	0.324	0.149	7.50795e-11	Human	KLHDC2
5.77433e-15	0.622818	0.108	0.003	8.1984e-11	Human	GLRA2
5.81589e-15	0.671391	0.178	0.025	8.2574e-11	Human	GCSH
6.69755e-15	0.609974	0.368	0.148	9.50919e-11	Human	CUTA
1.01159e-14	0.557349	0.136	0.02	1.43626e-10	Human	TSNAX
1.04442e-14	0.553947	0.101	0.006	1.48286e-10	Human	MSRB2
1.29332e-14	0.646816	0.283	0.092	1.83625e-10	Human	CAPZB
1.33735e-14	0.571911	0.183	0.049	1.89876e-10	Human	AKR1B1
1.33809e-14	0.652661	0.571	0.288	1.89982e-10	Human	SNRPD2
1.83821e-14	0.445873	0.18	0.043	2.60988e-10	Human	PTP4A1
1.84065e-14	0.37343	0.211	0.088	2.61335e-10	Human	OPTN
1.87275e-14	0.522202	0.624	0.34	2.65894e-10	Human	BRK1
2.40083e-14	0.482729	0.294	0.127	3.4087e-10	Human	SRM
2.41906e-14	0.700228	0.262	0.072	3.43459e-10	Human	ACP1
2.88463e-14	0.569511	0.305	0.107	4.09559e-10	Human	SRI
2.94782e-14	0.596747	0.382	0.159	4.18532e-10	Human	STRAP
2.96836e-14	0.539522	0.195	0.054	4.21447e-10	Human	VPS51
3.12587e-14	0.347228	0.165	0.051	4.4381e-10	Human	RAD50
3.15479e-14	0.418596	0.138	0.037	4.47918e-10	Human	UFSP2
3.57971e-14	0.590803	0.107	0.008	5.08248e-10	Human	CCNB1IP1
9.27815e-14	0.434141	0.379	0.168	1.31731e-09	Human	MEAF6
1.00217e-13	0.51236	0.19	0.058	1.42288e-09	Human	HNRNPH2
1.04396e-13	0.483124	0.318	0.133	1.48221e-09	Human	TSG101
1.30349e-13	0.596865	0.477	0.227	1.8507e-09	Human	TPGS2
1.78681e-13	0.425375	0.59	0.312	2.53692e-09	Human	PAIP2
1.92203e-13	0.420066	0.118	0.032	2.7289e-09	Human	FGD3
2.21808e-13	0.597479	0.173	0.039	3.14923e-09	Human	MTX2
2.3495e-13	0.620433	0.101	0.006	3.33581e-09	Human	PID1
2.38821e-13	0.417378	0.842	0.609	3.39078e-09	Human	PFN2
4.31361e-13	0.373414	0.285	0.133	6.12447e-09	Human	PSMA1
4.95552e-13	0.54515	0.58	0.309	7.03584e-09	Human	PARK7
5.09435e-13	0.382103	0.1	0.025	7.23296e-09	Human	HPCA
6.16257e-13	0.632214	0.158	0.026	8.74962e-09	Human	TUBA1C
6.26448e-13	0.434185	0.322	0.143	8.89431e-09	Human	LSM5
6.388e-13	0.520733	0.27	0.102	9.06969e-09	Human	PSMB2
8.19663e-13	0.565836	0.152	0.035	1.16376e-08	Human	ECI2
8.20571e-13	0.550674	0.273	0.099	1.16505e-08	Human	MMADHC
8.37867e-13	0.331711	0.888	0.625	1.1896e-08	Human	HMGB1
8.55948e-13	0.709719	0.157	0.024	1.21527e-08	Human	TMEFF2
1.20283e-12	0.410621	0.231	0.098	1.70777e-08	Human	EI24
1.23578e-12	0.304614	0.926	0.763	1.75456e-08	Human	RTN1
1.26049e-12	0.441428	0.126	0.033	1.78964e-08	Human	HDAC3
1.28038e-12	0.595294	0.365	0.148	1.81788e-08	Human	TRIM36
1.33874e-12	0.559986	0.109	0.011	1.90074e-08	Human	NSUN6
1.51353e-12	0.417413	0.224	0.063	2.14892e-08	Human	COMMD3
1.52377e-12	0.555377	0.139	0.028	2.16345e-08	Human	NUP160
1.67005e-12	0.565942	0.154	0.035	2.37114e-08	Human	CASP6
1.76804e-12	0.474171	0.129	0.039	2.51027e-08	Human	IFRD1
1.99056e-12	0.527635	0.703	0.437	2.8262e-08	Human	SRSF3
2.13523e-12	0.581263	0.14	0.018	3.03161e-08	Human	CDK5RAP3
2.27627e-12	0.423487	0.675	0.4	3.23185e-08	Human	TXN
4.17363e-12	0.549061	0.363	0.16	5.92572e-08	Human	MDH2
4.24441e-12	0.535527	0.207	0.069	6.02621e-08	Human	HOMER3
4.31436e-12	0.544249	0.215	0.066	6.12553e-08	Human	PIN4
4.75799e-12	0.383435	0.493	0.267	6.7554e-08	Human	RSL24D1
5.95752e-12	0.459722	0.159	0.051	8.45848e-08	Human	ZNF3
6.17503e-12	0.291738	0.323	0.154	8.76731e-08	Human	NHP2
7.43855e-12	0.421042	0.493	0.26	1.05612e-07	Human	NDUFA5
1.12002e-11	0.592159	0.167	0.042	1.5902e-07	Human	CCDC14
1.30188e-11	0.292715	0.371	0.198	1.8484e-07	Human	NDUFA12
1.44869e-11	0.425553	0.187	0.064	2.05686e-07	Human	MRPS35
1.62656e-11	0.477862	0.288	0.123	2.30938e-07	Human	SMS
1.79796e-11	0.439357	0.15	0.041	2.55274e-07	Human	LSM1
1.8066e-11	0.428668	0.173	0.064	2.56501e-07	Human	NGDN
1.89521e-11	0.424595	0.203	0.074	2.69082e-07	Human	KIAA1191
1.99304e-11	0.492658	0.155	0.04	2.82971e-07	Human	DEAF1
2.1261e-11	0.544048	0.128	0.028	3.01863e-07	Human	ABCD4
2.34308e-11	0.512156	0.236	0.076	3.32671e-07	Human	ARL6IP4
2.41163e-11	0.506688	0.103	0.013	3.42404e-07	Human	SMIM8
2.46045e-11	0.389512	0.352	0.177	3.49335e-07	Human	DUSP1
2.46313e-11	0.485077	0.292	0.128	3.49716e-07	Human	MAP3K13
2.69911e-11	0.452276	0.145	0.041	3.8322e-07	Human	PMVK
2.90627e-11	0.500996	0.29	0.13	4.12633e-07	Human	UQCRC2
2.95775e-11	0.507671	0.193	0.05	4.19941e-07	Human	PDIA6
3.01345e-11	0.393551	0.351	0.162	4.27849e-07	Human	VPS35
3.02188e-11	0.535598	0.601	0.365	4.29046e-07	Human	JUN
3.29557e-11	0.495817	0.143	0.041	4.67905e-07	Human	YIPF4
3.76599e-11	0.442715	0.276	0.13	5.34696e-07	Human	FUNDC2
3.84768e-11	0.438144	0.274	0.122	5.46293e-07	Human	MDK
4.07822e-11	0.548188	0.123	0.013	5.79025e-07	Human	SDR39U1
4.14803e-11	0.559183	0.116	0.015	5.88938e-07	Human	PPID
4.15549e-11	0.4754	0.246	0.097	5.89996e-07	Human	TRAPPC1
4.31109e-11	0.233316	0.679	0.469	6.12088e-07	Human	FEZ1
4.73937e-11	0.372888	0.107	0.022	6.72895e-07	Human	FAM104A
5.40897e-11	0.369926	0.15	0.048	7.67966e-07	Human	ARL6IP5
5.57518e-11	0.349933	0.22	0.093	7.91564e-07	Human	SCOC
5.62792e-11	0.432111	0.136	0.039	7.99052e-07	Human	MRPS10
6.38729e-11	0.528015	0.301	0.126	9.06868e-07	Human	SDCBP
6.93948e-11	0.365418	0.416	0.232	9.85268e-07	Human	KIF21A
6.96632e-11	0.482879	0.21	0.078	9.89079e-07	Human	SGCB
7.14272e-11	0.245399	0.401	0.228	1.01412e-06	Human	SIAH1
7.21864e-11	0.553007	0.313	0.122	1.0249e-06	Human	TUFM
7.32256e-11	0.524531	0.327	0.103	1.03966e-06	Human	SH3BP5
7.4956e-11	0.253564	0.111	0.039	1.06423e-06	Human	AGGF1
7.6803e-11	0.410919	0.144	0.045	1.09045e-06	Human	C1D
8.05462e-11	0.433185	0.172	0.059	1.14359e-06	Human	FBLN1
8.18491e-11	0.49438	0.186	0.052	1.16209e-06	Human	THYN1
8.54986e-11	0.368781	0.177	0.068	1.21391e-06	Human	PSMF1
9.22899e-11	0.381298	0.205	0.085	1.31033e-06	Human	GLRX5
1.04767e-10	0.428626	0.316	0.133	1.48749e-06	Human	FKBP1A
1.06463e-10	0.453373	0.395	0.197	1.51157e-06	Human	DRAXIN
1.10106e-10	0.304309	0.235	0.109	1.56329e-06	Human	RNF7
1.13658e-10	0.384173	0.64	0.403	1.61371e-06	Human	EDF1
1.19393e-10	0.491088	0.158	0.044	1.69514e-06	Human	ZNF791
1.36027e-10	0.417466	0.137	0.04	1.93131e-06	Human	ZNF677
1.36295e-10	0.3979	0.375	0.183	1.93512e-06	Human	GTF2A2
1.4178e-10	0.356087	0.165	0.045	2.01299e-06	Human	EMC6
1.43864e-10	0.375154	0.245	0.106	2.04259e-06	Human	TM2D3
1.44602e-10	0.384174	0.229	0.099	2.05305e-06	Human	PAPSS1
1.76908e-10	0.285467	0.257	0.135	2.51174e-06	Human	GPC2
1.8697e-10	0.466769	0.263	0.095	2.6546e-06	Human	PGM2L1
2.02245e-10	0.372847	0.1	0.025	2.87147e-06	Human	FBXL15
2.05753e-10	0.533279	0.194	0.06	2.92129e-06	Human	ECH1
2.09906e-10	0.467292	0.127	0.03	2.98024e-06	Human	PMM1
2.39963e-10	0.323307	0.288	0.144	3.407e-06	Human	CCDC90B
2.5616e-10	0.452476	0.114	0.021	3.63696e-06	Human	SAT1
2.62266e-10	0.495957	0.645	0.373	3.72366e-06	Human	SRP9
2.88767e-10	0.391865	0.183	0.061	4.09991e-06	Human	RAC3
3.06882e-10	0.471287	0.139	0.04	4.35711e-06	Human	PHYKPL
3.20708e-10	0.518406	0.232	0.082	4.55341e-06	Human	NUDT1
3.24405e-10	0.640082	0.152	0.024	4.6059e-06	Human	PDIA3
3.29084e-10	0.389333	0.54	0.307	4.67233e-06	Human	PABPC1
3.39199e-10	0.374434	0.252	0.115	4.81595e-06	Human	ACTR1A
3.90967e-10	0.295712	0.377	0.196	5.55094e-06	Human	CSNK2B
4.0624e-10	0.442844	0.705	0.452	5.76779e-06	Human	DLX2
4.38301e-10	0.377236	0.188	0.074	6.223e-06	Human	ARMC1
4.63397e-10	0.439627	0.194	0.072	6.57931e-06	Human	POLR2G
4.66324e-10	0.274664	0.49	0.293	6.62087e-06	Human	UBE2D2
4.82831e-10	0.452733	0.765	0.512	6.85524e-06	Human	HNRNPA0
4.88393e-10	0.390413	0.113	0.028	6.93421e-06	Human	SNRNP25
5.21606e-10	0.465371	0.245	0.093	7.40576e-06	Human	RNF187
5.42484e-10	0.333616	0.119	0.04	7.70218e-06	Human	SYP
5.65126e-10	0.544278	0.351	0.155	8.02367e-06	Human	SH3BGRL
5.79888e-10	0.408852	0.232	0.099	8.23325e-06	Human	ZNHIT3
6.47395e-10	0.384348	0.108	0.02	9.19171e-06	Human	ZNF883
6.57979e-10	0.330258	0.119	0.043	9.34199e-06	Human	KBTBD6
6.71964e-10	0.510373	0.294	0.124	9.54055e-06	Human	ENO2
8.71697e-10	0.295531	0.164	0.072	1.23764e-05	Human	TCEA2
9.1636e-10	0.309638	0.362	0.198	1.30105e-05	Human	SNX3
9.25838e-10	0.328808	0.464	0.264	1.3145e-05	Human	SYF2
9.62909e-10	0.548229	0.406	0.181	1.36714e-05	Human	HSPD1
1.0447e-09	0.302336	0.516	0.311	1.48327e-05	Human	COX8A
1.23436e-09	0.289512	0.142	0.057	1.75254e-05	Human	BAD
1.31249e-09	0.369024	0.102	0.023	1.86347e-05	Human	HAGH
1.32754e-09	0.493855	0.174	0.077	1.88484e-05	Human	CXCR4
1.42361e-09	0.301721	0.584	0.373	2.02125e-05	Human	EIF3H
1.50767e-09	0.268238	0.267	0.143	2.1406e-05	Human	PSMD4
1.52316e-09	0.400453	0.395	0.203	2.16258e-05	Human	COPE
1.56442e-09	0.283734	0.255	0.122	2.22117e-05	Human	FAM200B
1.59194e-09	0.566558	0.169	0.045	2.26024e-05	Human	SMIM20
1.6424e-09	0.324411	0.131	0.044	2.33188e-05	Human	TRIAP1
1.6439e-09	0.37029	0.185	0.07	2.334e-05	Human	PSMG2
1.66938e-09	0.33666	0.174	0.071	2.37019e-05	Human	NDRG2
1.78997e-09	0.456887	0.11	0.024	2.5414e-05	Human	RCN1
2.1061e-09	0.406732	0.138	0.029	2.99024e-05	Human	SDHA
2.11428e-09	0.406034	0.15	0.05	3.00186e-05	Human	ISCU
2.17667e-09	0.476383	0.267	0.106	3.09043e-05	Human	MAGEF1
2.3023e-09	0.397751	0.201	0.087	3.2688e-05	Human	SLC3A2
2.32366e-09	0.33182	0.153	0.053	3.29913e-05	Human	MEA1
2.35387e-09	0.345056	0.123	0.036	3.34203e-05	Human	RAB8A
2.40356e-09	0.453593	0.176	0.047	3.41257e-05	Human	VIM
2.45934e-09	0.294942	0.115	0.039	3.49177e-05	Human	SLC36A4
2.53476e-09	0.333197	0.229	0.111	3.59885e-05	Human	EIF4E
2.60158e-09	0.245274	0.201	0.093	3.69372e-05	Human	PSMD7
2.74116e-09	0.460984	0.23	0.079	3.89189e-05	Human	PHB
2.75732e-09	0.449296	0.102	0.019	3.91484e-05	Human	MICAL1
2.81569e-09	0.369536	0.108	0.031	3.99772e-05	Human	SMARCD3
2.85064e-09	0.236646	0.541	0.345	4.04734e-05	Human	PFDN2
3.15324e-09	0.495796	0.147	0.035	4.47697e-05	Human	NOC2L
3.22232e-09	0.265439	0.139	0.053	4.57505e-05	Human	ACO2
3.59935e-09	0.369196	0.379	0.191	5.11036e-05	Human	SAT2
3.71557e-09	0.549739	0.245	0.085	5.27537e-05	Human	PPP1R15A
3.93798e-09	0.246723	0.497	0.305	5.59115e-05	Human	NEDD8
4.07106e-09	0.350823	0.144	0.053	5.78009e-05	Human	PRPF31
4.07107e-09	0.465963	0.127	0.035	5.78011e-05	Human	CLGN
4.27012e-09	0.366924	0.221	0.092	6.06272e-05	Human	NELFCD
4.36094e-09	0.589184	0.347	0.131	6.19166e-05	Human	COX20
4.54439e-09	0.294219	0.116	0.041	6.45213e-05	Human	IFNAR1
5.08678e-09	0.555264	0.202	0.063	7.22221e-05	Human	TXNDC17
5.13418e-09	0.407885	0.27	0.111	7.28951e-05	Human	FRG1
5.23877e-09	0.427579	0.194	0.072	7.43801e-05	Human	GTF3A
5.24758e-09	0.369205	0.305	0.143	7.45052e-05	Human	SLC39A6
6.09022e-09	0.234084	0.354	0.207	8.64689e-05	Human	LMO4
6.13075e-09	0.422484	0.147	0.046	8.70443e-05	Human	MSMO1
6.40867e-09	0.306581	0.127	0.051	9.09904e-05	Human	NUBP2
6.56927e-09	0.302873	0.279	0.14	9.32705e-05	Human	MOB4
6.92647e-09	0.368288	0.561	0.318	9.8342e-05	Human	SF3B6
7.21868e-09	0.233032	0.383	0.22	0.000102491	Human	ARL6IP1
7.35342e-09	0.226407	0.371	0.213	0.000104404	Human	BTF3L4
8.28263e-09	0.294302	0.186	0.09	0.000117597	Human	FIBP
8.53995e-09	0.371983	0.282	0.129	0.00012125	Human	TMED2
8.90904e-09	0.489657	0.408	0.213	0.000126491	Human	CSNK1E
9.48e-09	0.273156	0.14	0.062	0.000134597	Human	RPN2
9.82123e-09	0.378034	0.273	0.125	0.000139442	Human	TTLL7
9.97608e-09	0.232623	0.421	0.245	0.00014164	Human	KRT10
1.05906e-08	0.342438	0.114	0.037	0.000150365	Human	MRPS2
1.12602e-08	0.324426	0.108	0.034	0.000159873	Human	BPHL
1.19319e-08	0.399009	0.117	0.031	0.000169408	Human	AMZ2
1.36069e-08	0.31405	0.208	0.095	0.000193191	Human	MPLKIP
1.39039e-08	0.336741	0.217	0.094	0.000197407	Human	SMIM14
1.41982e-08	0.409427	0.113	0.025	0.000201587	Human	TRIM16
1.42056e-08	0.384965	0.485	0.268	0.000201691	Human	UQCRQ
1.42943e-08	0.423398	0.149	0.047	0.000202951	Human	OSTC
1.48063e-08	0.371996	0.216	0.097	0.00021022	Human	MED30
1.52232e-08	0.225279	0.211	0.11	0.000216139	Human	EZR
1.53881e-08	0.325954	0.107	0.03	0.000218481	Human	PINK1
1.61529e-08	0.384848	0.16	0.047	0.000229339	Human	PRKRA
1.6893e-08	0.273958	0.368	0.207	0.000239847	Human	COX5A
1.78789e-08	0.250649	0.116	0.047	0.000253845	Human	CREB3
1.8053e-08	0.37706	0.102	0.021	0.000256316	Human	PXMP2
1.8676e-08	0.369287	0.406	0.217	0.000265162	Human	SPCS2
1.95127e-08	0.335972	0.347	0.171	0.000277042	Human	VBP1
2.0338e-08	0.475717	0.178	0.058	0.000288759	Human	SDHC
2.05733e-08	0.311611	0.458	0.264	0.0002921	Human	OST4
2.19381e-08	0.333578	0.125	0.045	0.000311478	Human	HILPDA
2.27798e-08	0.568011	0.146	0.031	0.000323427	Human	TMEM165
2.31617e-08	0.310091	0.799	0.584	0.000328849	Human	CRMP1
2.45747e-08	0.273309	0.143	0.06	0.000348911	Human	MRPL3
2.54335e-08	0.37431	0.11	0.028	0.000361105	Human	SDCCAG8
2.97845e-08	0.29429	0.201	0.098	0.000422881	Human	TLE1
3.10454e-08	0.423371	0.133	0.037	0.000440782	Human	MRPL16
3.17746e-08	0.370545	0.188	0.075	0.000451136	Human	PTS
3.42188e-08	0.362788	0.29	0.144	0.000485839	Human	UQCRFS1
3.4339e-08	0.391739	0.197	0.08	0.000487544	Human	RNASEH2B
3.59241e-08	0.473196	0.211	0.074	0.00051005	Human	POLR2C
3.71526e-08	0.267649	0.133	0.051	0.000527492	Human	IER3IP1
3.75059e-08	0.430756	0.113	0.023	0.000532509	Human	NUDT5
3.86793e-08	0.321764	0.442	0.248	0.000549169	Human	ANAPC11
3.92844e-08	0.511216	0.213	0.068	0.00055776	Human	PDCD7
3.94631e-08	0.353959	0.188	0.072	0.000560297	Human	MRPL44
4.462e-08	0.277205	0.472	0.278	0.000633514	Human	POMP
4.62003e-08	0.297853	0.15	0.062	0.000655951	Human	SCCPDH
4.76443e-08	0.537758	0.166	0.043	0.000676454	Human	LYPLA1
4.97795e-08	0.355958	0.265	0.119	0.00070677	Human	POLR2B
5.082e-08	0.363137	0.565	0.335	0.000721543	Human	HSBP1
5.18687e-08	0.240582	0.323	0.183	0.000736432	Human	PSMC3
5.22694e-08	0.293872	0.165	0.073	0.000742121	Human	MRPS36
5.31125e-08	0.504601	0.346	0.154	0.000754091	Human	ALKBH7
5.37902e-08	0.333412	0.697	0.463	0.000763713	Human	MORF4L1
5.38406e-08	0.362515	0.296	0.146	0.000764429	Human	APLP1
5.47591e-08	0.234563	0.104	0.033	0.00077747	Human	NAPA
5.68745e-08	0.274073	0.572	0.373	0.000807504	Human	TBCB
5.9641e-08	0.484304	0.15	0.032	0.000846784	Human	ARHGDIA
6.65666e-08	0.429801	0.124	0.036	0.000945113	Human	POLD2
6.82801e-08	0.383367	0.103	0.023	0.000969442	Human	TMEM256
7.0514e-08	0.284886	0.293	0.155	0.00100116	Human	MPPED2
7.64792e-08	0.277171	0.164	0.071	0.00108585	Human	ACTL6A
8.08249e-08	0.26474	0.565	0.351	0.00114755	Human	VPS28
8.23463e-08	0.511108	0.146	0.032	0.00116915	Human	CCZ1
8.27408e-08	0.435736	0.129	0.042	0.00117475	Human	DUSP4
8.54946e-08	0.421157	0.106	0.024	0.00121385	Human	SPAG16
8.92206e-08	0.373554	0.125	0.041	0.00126675	Human	POLK
8.97343e-08	0.371911	0.296	0.152	0.00127405	Human	TOMM22
9.40117e-08	0.391366	0.353	0.185	0.00133478	Human	PPA1
9.87296e-08	0.342837	0.138	0.047	0.00140176	Human	CISD2
1.05998e-07	0.452591	0.206	0.075	0.00150496	Human	IDH3G
1.15019e-07	0.353254	0.22	0.102	0.00163304	Human	TMEM14A
1.19728e-07	0.280151	0.137	0.059	0.0016999	Human	MFSD10
1.23453e-07	0.228365	0.314	0.185	0.00175278	Human	ZNF22
1.453e-07	0.29891	0.115	0.04	0.00206297	Human	NXT1
1.46124e-07	0.266632	0.137	0.056	0.00207467	Human	CCDC115
1.53746e-07	0.36578	0.1	0.024	0.00218288	Human	SCAI
1.67994e-07	0.363856	0.114	0.033	0.00238518	Human	SRFBP1
1.80483e-07	0.301587	0.48	0.276	0.0025625	Human	TCP1
2.16332e-07	0.363702	0.434	0.229	0.00307148	Human	RBM8A
2.32524e-07	0.246497	0.829	0.627	0.00330137	Human	ZNF428
2.35181e-07	0.329522	0.104	0.034	0.0033391	Human	F2R
2.46375e-07	0.331664	0.117	0.036	0.00349804	Human	LRRC61
2.54922e-07	0.380798	0.101	0.026	0.00361938	Human	FAM228B
2.64936e-07	0.259746	0.743	0.526	0.00376156	Human	RAC1
2.76881e-07	0.344593	0.173	0.077	0.00393116	Human	CDCA7
2.99076e-07	0.292347	0.205	0.103	0.00424629	Human	NARF
3.52245e-07	0.353025	0.15	0.057	0.00500118	Human	GGA1
3.54117e-07	0.244487	0.41	0.235	0.00502775	Human	PFDN4
3.61504e-07	0.239375	0.399	0.236	0.00513264	Human	TMEM59
3.68404e-07	0.350184	0.249	0.126	0.0052306	Human	TUBB4B
3.79403e-07	0.427271	0.151	0.048	0.00538676	Human	LCMT1
4.29182e-07	0.492314	0.121	0.029	0.00609353	Human	DNAJB9
4.57875e-07	0.415514	0.343	0.149	0.0065009	Human	PPIB
4.68103e-07	0.313147	0.119	0.045	0.00664613	Human	TSR3
4.86688e-07	0.29193	0.181	0.084	0.00690999	Human	ARFGAP2
5.00648e-07	0.405489	0.116	0.029	0.0071082	Human	ILK
5.22728e-07	0.510216	0.203	0.058	0.00742169	Human	MAZ
5.52159e-07	0.256576	0.125	0.038	0.00783956	Human	CTDNEP1
5.80338e-07	0.294745	0.206	0.084	0.00823964	Human	STUB1
5.95423e-07	0.305048	0.194	0.089	0.00845381	Human	CCNL2
6.25508e-07	0.290453	0.619	0.36	0.00888096	Human	SERF2
6.81266e-07	0.293619	0.103	0.039	0.00967261	Human	LYRM9
6.91969e-07	0.239239	0.206	0.106	0.00982458	Human	ECHS1
