# Supplementary material for: Cortical arealization of interneurons defines shared and distinct molecular programs in developing human and macaque brains
Source: Research Square preprint supplement (doi:10.21203/rs.3.rs-3939272/v1), 2024-02-26
Supplement: Supplementary file 6 [file 855fabf445359cea33197cad.xlsx]

## Sheet: Supplementary Data 9
Table S9. Gene expression specificity scores for different cortical lobes
Gene	FC	MSC	OC	TC	Iteration	species_transAge
HNRNPU	0	0.04	0	0	1	Human_GW18
COX20	0	0.07	0	0	1	Human_GW18
CEP170	0	0	0.02	0	1	Human_GW18
OPN3	0	0.66	0	0.19	1	Human_GW18
ARID4B	0	0.04	0	0	1	Human_GW18
TOMM20	0	0.02	0	0	1	Human_GW18
IRF2BP2	0	0.25	0	0	1	Human_GW18
SIPA1L2	0	0.32	0	0.08	1	Human_GW18
EGLN1	0	0.29	0	0.16	1	Human_GW18
CCSAP	0	0.29	0	0	1	Human_GW18
PBX1	0	0.02	0	0	1	Human_GW18
MGST3	0	0.03	0	0.01	1	Human_GW18
POGK	0	0.23	0	0	1	Human_GW18
GPR161	0	0.15	0	0	1	Human_GW18
ATP1B1	0	0	0.26	0	1	Human_GW18
IER5	0	0.3	0	0.22	1	Human_GW18
GLUL	0	0.15	0	0.04	1	Human_GW18
TPR	0	0.01	0.19	0	1	Human_GW18
BRINP3	0	0	0.77	0	1	Human_GW18
KIF21B	0	0.21	0	0	1	Human_GW18
ARL8A	0	0.14	0	0.12	1	Human_GW18
NUCKS1	0	0	0.2	0	1	Human_GW18
CD46	0	0.42	0	0.13	1	Human_GW18
LPGAT1	0	0.25	0	0.05	1	Human_GW18
RRP15	0	0.27	0	0	1	Human_GW18
DEGS1	0	0.09	0.33	0	1	Human_GW18
LBR	0	0.2	0	0	1	Human_GW18
ENAH	0	0.04	0	0	1	Human_GW18
ACBD3	0	0.44	0	0	1	Human_GW18
GUK1	0.46	0	0.02	0	1	Human_GW18
RNF187	0	0.15	0	0.49	1	Human_GW18
NOS1AP	0	0.35	0	0.17	1	Human_GW18
VANGL2	0	0.4	0.22	0	1	Human_GW18
HDGF	0	0.17	0	0.25	1	Human_GW18
NES	0	0.38	0	0.21	1	Human_GW18
MEX3A	0	0.04	0	0	1	Human_GW18
RUSC1	0	0.11	0.1	0	1	Human_GW18
RPS27	0.24	0.17	0.04	0.12	1	Human_GW18
JTB	0.47	0	0.06	0	1	Human_GW18
MLLT11	0.39	0	0	0	1	Human_GW18
APH1A	0	0	0.03	0.3	1	Human_GW18
PLEKHO1	0	0.24	0	0.11	1	Human_GW18
RSBN1	0	0.12	0	0	1	Human_GW18
PRPF38B	0	0.04	0	0	1	Human_GW18
SLC25A24	0	0.6	0	0	1	Human_GW18
PTBP2	0	0.2	0	0	1	Human_GW18
CNN3	0	0	0.3	0	1	Human_GW18
DNTTIP2	0	0.04	0	0.1	1	Human_GW18
FNBP1L	0	0.01	0	0	1	Human_GW18
GTF2B	0	0.06	0.1	0	1	Human_GW18
PKN2	0	0.16	0	0	1	Human_GW18
LMO4	0	0.08	0	0	1	Human_GW18
SH3GLB1	0	0.11	0	0	1	Human_GW18
TTLL7	0	0.1	0	0	1	Human_GW18
IFI44	0	0.29	0	0.12	1	Human_GW18
USP33	0	0.15	0	0	1	Human_GW18
WLS	0	0	0.64	0	1	Human_GW18
GADD45A	0	0.44	0	0.14	1	Human_GW18
SERBP1	0	0.01	0.23	0	1	Human_GW18
DOCK7	0	0.3	0	0	1	Human_GW18
NFIA	0.6	0	0.12	0	1	Human_GW18
FAF1	0	0.2	0	0.65	1	Human_GW18
ELAVL4	0	0	0	0	1	Human_GW18
BEND5	0	0.14	0	0	1	Human_GW18
CMPK1	0	0.16	0	0	1	Human_GW18
RPS8	0.17	0.16	0.24	0.13	1	Human_GW18
YBX1	0.62	0	0	0	1	Human_GW18
SMAP2	0	0.41	0	0.1	1	Human_GW18
PABPC4	0	0.5	0	0	1	Human_GW18
MACF1	0	0.11	0	0	1	Human_GW18
POU3F1	0	0.74	0	0	1	Human_GW18
YRDC	0	0.39	0	0.19	1	Human_GW18
ZMYM4	0	0.17	0	0	1	Human_GW18
SFPQ	0	0.09	0	0.12	1	Human_GW18
PHC2	0	0.41	0	0.13	1	Human_GW18
FNDC5	0	0.22	0	0.43	1	Human_GW18
MARCKSL1	0.27	0	0	0	1	Human_GW18
KHDRBS1	0	0.04	0	0.01	1	Human_GW18
PTP4A2	0	0.25	0	0.18	1	Human_GW18
SRSF4	0	0.05	0	0	1	Human_GW18
YTHDF2	0	0.04	0	0	1	Human_GW18
TRNAU1AP	0	0.2	0	0	1	Human_GW18
PHACTR4	0	0.31	0	0	1	Human_GW18
HMGN2	0.2	0	0	0	1	Human_GW18
SH3BGRL3	0	0.08	0	0	1	Human_GW18
STMN1	0.21	0.22	0.22	0.24	1	Human_GW18
SRSF10	0	0.05	0	0	1	Human_GW18
RPL11	0.24	0.24	0.22	0.23	1	Human_GW18
HNRNPR	0	0	0.01	0	1	Human_GW18
KDM1A	0	0.35	0	0.07	1	Human_GW18
HP1BP3	0.02	0.01	0.14	0	1	Human_GW18
PINK1	0	0.04	0	0.32	1	Human_GW18
CAMK2N1	0	0.05	0	0.15	1	Human_GW18
SRM	0	0.34	0	0.09	1	Human_GW18
KIF1B	0	0.12	0	0	1	Human_GW18
CTNNBIP1	0	0.36	0	0.08	1	Human_GW18
RERE	0.28	0.06	0	0	1	Human_GW18
ACOT7	0.51	0	0.11	0	1	Human_GW18
GNB1	0	0.06	0	0	1	Human_GW18
SSU72	0	0.02	0	0.11	1	Human_GW18
HES4	0	0.43	0	0.23	1	Human_GW18
RPL35A	0.26	0.13	0.01	0.1	1	Human_GW18
PAK2	0	0.03	0	0	1	Human_GW18
SENP5	0	0.38	0.11	0	1	Human_GW18
CCDC50	0	0.21	0	0	1	Human_GW18
SST	0	0	0.35	0.07	1	Human_GW18
EIF4A2	0.27	0	0	0	1	Human_GW18
ARPP21	0.63	0	0.15	0	1	Human_GW18
DYNC1LI1	0	0.05	0	0	1	Human_GW18
TOP2B	0	0.05	0	0	1	Human_GW18
RPL15	0.17	0.07	0.21	0.19	1	Human_GW18
KCNH8	0	0.35	0.02	0	1	Human_GW18
SATB1	0	0	0.35	0.08	1	Human_GW18
CAPN7	0	0.34	0	0	1	Human_GW18
CDV3	0	0.58	0	0	1	Human_GW18
MRPS22	0	0.12	0	0	1	Human_GW18
COPB2	0	0.04	0	0.04	1	Human_GW18
RBP1	0.16	0	0	0	1	Human_GW18
SLC25A36	0	0.18	0	0	1	Human_GW18
SPSB4	0	0.63	0	0.03	1	Human_GW18
PFN2	0	0	0	0	1	Human_GW18
SIAH2	0	0.42	0	0.19	1	Human_GW18
DHX36	0	0.03	0	0	1	Human_GW18
KPNA4	0	0.15	0	0.09	1	Human_GW18
SEC62	0	0.01	0	0	1	Human_GW18
RPL22L1	0	0.17	0.08	0	1	Human_GW18
TBL1XR1	0	0.2	0	0.08	1	Human_GW18
PIK3CA	0	0.37	0	0	1	Human_GW18
ZNF639	0	0.39	0	0	1	Human_GW18
NDUFB5	0	0.06	0.1	0	1	Human_GW18
FXR1	0	0.24	0	0	1	Human_GW18
SOX2	0	0.02	0	0	1	Human_GW18
TRA2B	0	0.01	0	0	1	Human_GW18
ACVR2B	0	0.28	0	0.13	1	Human_GW18
RPSA	0.06	0	0	0.06	1	Human_GW18
EIF1B	0	0	0	0	1	Human_GW18
ANO10	0	0.42	0	0	1	Human_GW18
TMEM158	0	0.28	0	0.19	1	Human_GW18
NDUFAF3	0.04	0	0.39	0	1	Human_GW18
RHOA	0	0.16	0	0	1	Human_GW18
CAMKV	0.66	0	0.16	0	1	Human_GW18
GNAI2	0	0.46	0	0.12	1	Human_GW18
RBM15B	0	0.28	0	0.2	1	Human_GW18
RPL29	0.19	0.1	0.11	0.1	1	Human_GW18
NT5DC2	0	0.15	0	0.65	1	Human_GW18
PBRM1	0	0.08	0	0	1	Human_GW18
CADPS	0	0.08	0	0	1	Human_GW18
ARL6IP5	0	0	0.48	0	1	Human_GW18
FRMD4B	0.36	0	0.48	0	1	Human_GW18
GPR27	0	0.22	0	0.23	1	Human_GW18
CHL1	0	0	0.46	0	1	Human_GW18
LRRN1	0	0.4	0	0	1	Human_GW18
VGLL4	0	0.05	0	0	1	Human_GW18
RPL32	0.31	0.21	0.14	0.21	1	Human_GW18
LSM3	0.15	0	0	0	1	Human_GW18
GRIP2	0	0	0.51	0	1	Human_GW18
CCDC174	0	0.03	0	0	1	Human_GW18
MGLL	0	0	0.68	0	1	Human_GW18
NDUFB4	0	0	0	0	1	Human_GW18
GAP43	0.46	0	0	0	1	Human_GW18
TAGLN3	0	0	0	0.05	1	Human_GW18
TRMT10C	0	0.06	0.04	0	1	Human_GW18
SENP7	0	0.08	0	0	1	Human_GW18
CLDND1	0	0.12	0	0.08	1	Human_GW18
CRYBG3	0	0.68	0	0.13	1	Human_GW18
ROBO1	0	0	0.25	0	1	Human_GW18
PRMT2	0	0.03	0	0	1	Human_GW18
PTTG1IP	0	0.34	0	0	1	Human_GW18
TRAPPC10	0	0.57	0	0.04	1	Human_GW18
ABCG1	0	0.65	0	0	1	Human_GW18
B3GALT5	0	0	0.99	0	1	Human_GW18
HMGN1	0	0	0.05	0	1	Human_GW18
ITSN1	0.17	0	0	0	1	Human_GW18
SON	0	0.01	0	0	1	Human_GW18
PAXBP1	0	0.56	0	0	1	Human_GW18
CCT8	0	0	0.06	0	1	Human_GW18
ADAMTS5	0	0.68	0	0.02	1	Human_GW18
BTG3	0	0.34	0	0	1	Human_GW18
CXADR	0.13	0	0.43	0	1	Human_GW18
COX19	0	0.16	0	0	1	Human_GW18
ELFN1	0	0.27	0	0	1	Human_GW18
TNRC18	0	0.48	0	0.17	1	Human_GW18
ACTB	0	0.04	0.12	0	1	Human_GW18
FSCN1	0	0.06	0	0	1	Human_GW18
RAC1	0	0.22	0	0.16	1	Human_GW18
BRI3	0	0.24	0	0.19	1	Human_GW18
PPP1R35	0	0.65	0	0	1	Human_GW18
GNB2	0	0.21	0	0.05	1	Human_GW18
CUX1	0	0.13	0	0	1	Human_GW18
SH2B2	0	0.42	0	0.46	1	Human_GW18
PRKRIP1	0	0.26	0	0	1	Human_GW18
BAZ1B	0	0.25	0	0.04	1	Human_GW18
VPS37D	0	0.33	0	0.19	1	Human_GW18
GTF2I	0	0.02	0	0	1	Human_GW18
SBDS	0	0.09	0	0	1	Human_GW18
ZNF92	0	0.22	0	0.18	1	Human_GW18
CHCHD2	0	0	0.2	0	1	Human_GW18
SEC61G	0	0	0	0	1	Human_GW18
VSTM2A	0	0	0.41	0.18	1	Human_GW18
CCM2	0	0.17	0	0.57	1	Human_GW18
CDK13	0	0.33	0	0.06	1	Human_GW18
EPDR1	0.1	0	0.74	0	1	Human_GW18
NT5C3A	0	0.04	0.06	0	1	Human_GW18
NEUROD6	0.59	0	0	0.21	1	Human_GW18
CBX3	0	0.15	0	0	1	Human_GW18
HNRNPA2B1	0	0	0.07	0	1	Human_GW18
TRA2A	0	0.08	0.03	0	1	Human_GW18
KLHL7	0	0.2	0	0	1	Human_GW18
SP4	0	0.31	0.14	0	1	Human_GW18
PHF14	0	0	0.12	0	1	Human_GW18
NXPH1	0	0	0.41	0	1	Human_GW18
GLCCI1	0	0.36	0	0	1	Human_GW18
TAC1	0	0	0.46	0.1	1	Human_GW18
DLX5	0	0.03	0	0.01	1	Human_GW18
DLX6	0	0.36	0	0.17	1	Human_GW18
FAM133B	0	0.04	0	0	1	Human_GW18
SEMA3A	0.21	0	0.47	0	1	Human_GW18
PCLO	0.11	0	0.61	0	1	Human_GW18
RSBN1L	0	0.08	0	0	1	Human_GW18
PTPN12	0	0.4	0	0	1	Human_GW18
KMT2E	0	0	0	0	1	Human_GW18
CCDC71L	0	0.56	0	0.21	1	Human_GW18
PRKAR2B	0	0.32	0	0.07	1	Human_GW18
PTPRZ1	0.45	0	0.2	0	1	Human_GW18
WASL	0	0.36	0	0	1	Human_GW18
ARF5	0	0.04	0	0	1	Human_GW18
UBE2H	0	0.13	0	0	1	Human_GW18
MTPN	0	0	0.12	0	1	Human_GW18
PTN	0	0	0.4	0	1	Human_GW18
TRIM24	0	0.23	0	0	1	Human_GW18
EZH2	0	0.11	0	0	1	Human_GW18
ZNF775	0	0.65	0	0.23	1	Human_GW18
QKI	0	0.16	0	0.14	1	Human_GW18
WTAP	0	0.27	0	0	1	Human_GW18
AMD1	0	0.14	0	0	1	Human_GW18
FYN	0	0.11	0	0.14	1	Human_GW18
MARCKS	0	0.07	0	0.12	1	Human_GW18
HDAC2	0	0.01	0	0	1	Human_GW18
TSPYL1	0	0.09	0.06	0	1	Human_GW18
GOPC	0	0.07	0	0	1	Human_GW18
HSF2	0	0.24	0	0	1	Human_GW18
FABP7	0.01	0	0	0.2	1	Human_GW18
RSPO3	0.73	0	0	0	1	Human_GW18
RPS12	0.21	0.13	0.12	0.11	1	Human_GW18
HEBP2	0	0.34	0	0	1	Human_GW18
CITED2	0	0.42	0	0.09	1	Human_GW18
AIG1	0	0	0.63	0	1	Human_GW18
KATNA1	0	0.35	0	0	1	Human_GW18
TIAM2	0	0.28	0	0	1	Human_GW18
POU3F2	0	0.5	0	0	1	Human_GW18
PNRC1	0	0.21	0	0	1	Human_GW18
AKIRIN2	0	0.22	0	0.14	1	Human_GW18
ZNF292	0	0	0	0	1	Human_GW18
LCA5	0	0.56	0	0	1	Human_GW18
HMGN3	0	0.03	0	0	1	Human_GW18
PHIP	0	0.03	0	0	1	Human_GW18
COX7A2	0.37	0	0	0	1	Human_GW18
EEF1A1	0.1	0.25	0.25	0.25	1	Human_GW18
ZNF451	0	0.2	0	0	1	Human_GW18
HSP90AB1	0	0	0.19	0	1	Human_GW18
RRP36	0	0.41	0	0.21	1	Human_GW18
RPL7L1	0	0	0	0	1	Human_GW18
ZFAND3	0	0.55	0	0	1	Human_GW18
RPL10A	0.21	0	0	0	1	Human_GW18
RPS10	0.54	0	0	0	1	Human_GW18
NUDT3	0	0	0	0	1	Human_GW18
CUTA	0.25	0	0.17	0	1	Human_GW18
RPS18	0.32	0.15	0.19	0.21	1	Human_GW18
BRD2	0	0.06	0	0.02	1	Human_GW18
HSPA1A	0	0.27	0	0.61	1	Human_GW18
DDAH2	0.06	0	0	0	1	Human_GW18
TUBB	0.12	0.09	0.02	0.09	1	Human_GW18
SOX4	0	0.06	0	0	1	Human_GW18
DEK	0	0.08	0	0	1	Human_GW18
NOL7	0	0.04	0.1	0	1	Human_GW18
PRPF4B	0	0.08	0	0	1	Human_GW18
PXDC1	0	0.39	0	0.22	1	Human_GW18
TUBB2B	0.07	0.03	0.02	0	1	Human_GW18
MXD4	0	0.35	0	0	1	Human_GW18
HTT	0	0.31	0	0.1	1	Human_GW18
TBC1D14	0	0	0.56	0	1	Human_GW18
BLOC1S4	0	0.38	0	0.21	1	Human_GW18
CRMP1	0	0	0	0	1	Human_GW18
BOD1L1	0	0.15	0	0.16	1	Human_GW18
RPL9	0.2	0.15	0.08	0.17	1	Human_GW18
APBB2	0	0.62	0	0	1	Human_GW18
UCHL1	0	0	0	0.03	1	Human_GW18
BEND4	0	0.56	0	0.13	1	Human_GW18
GABRA2	0	0	0.58	0	1	Human_GW18
HNRNPDL	0	0	0.03	0	1	Human_GW18
HNRNPD	0	0.26	0	0.1	1	Human_GW18
CCNG2	0	0.15	0	0	1	Human_GW18
CCNI	0	0	0.24	0	1	Human_GW18
FAM47E	0	0	0.85	0.21	1	Human_GW18
SCARB2	0	0.15	0	0	1	Human_GW18
G3BP2	0	0.03	0	0	1	Human_GW18
SLC4A4	0	0.72	0	0.15	1	Human_GW18
YTHDC1	0	0.05	0	0	1	Human_GW18
EXOC1	0	0.15	0.06	0	1	Human_GW18
CHIC2	0	0.26	0	0.17	1	Human_GW18
SGCB	0	0.15	0	0	1	Human_GW18
CCSER1	0	0.15	0	0	1	Human_GW18
GRID2	0.39	0	0.5	0	1	Human_GW18
SMARCAD1	0	0.09	0.39	0	1	Human_GW18
RPL37A	0.2	0.19	0	0.19	1	Human_GW18
PAPSS1	0	0	0	0	1	Human_GW18
RPL34	0.29	0.2	0.14	0.16	1	Human_GW18
NDST4	0	0	0.92	0	1	Human_GW18
ELF2	0	0.24	0	0	1	Human_GW18
SMARCA5	0	0.19	0	0	1	Human_GW18
DCLK2	0	0.41	0	0.03	1	Human_GW18
RPS3A	0.26	0.23	0.22	0.23	1	Human_GW18
GRIA2	0.1	0	0.35	0	1	Human_GW18
CPE	0	0.34	0	0.02	1	Human_GW18
SAP30	0	0.68	0	0.2	1	Human_GW18
CDKN2AIP	0	0.3	0.12	0	1	Human_GW18
CFAP97	0	0	0.5	0	1	Human_GW18
BRD9	0	0.31	0	0	1	Human_GW18
NDUFS6	0.06	0	0.09	0	1	Human_GW18
MED10	0	0.06	0	0	1	Human_GW18
CCT5	0	0	0	0.13	1	Human_GW18
BASP1	0	0.07	0	0.09	1	Human_GW18
DNAJC21	0	0.69	0	0.13	1	Human_GW18
WDR70	0	0.19	0.16	0	1	Human_GW18
RPL37	0	0.08	0	0.02	1	Human_GW18
PAIP1	0	0.05	0.03	0	1	Human_GW18
HSPB3	0.15	0	0.84	0	1	Human_GW18
PLK2	0	0.02	0.37	0	1	Human_GW18
KIF2A	0	0.03	0	0	1	Human_GW18
SREK1IP1	0	0.21	0	0	1	Human_GW18
BDP1	0	0.05	0	0	1	Human_GW18
MAP1B	0	0.01	0	0	1	Human_GW18
ENC1	0	0	0.54	0	1	Human_GW18
NSA2	0	0.02	0	0	1	Human_GW18
TBCA	0	0	0	0	1	Human_GW18
RPS23	0.21	0.18	0.13	0.18	1	Human_GW18
MEF2C	0	0	0.29	0	1	Human_GW18
ARRDC3	0	0.32	0	0	1	Human_GW18
NR2F1	0	0	0.52	0.16	1	Human_GW18
RHOBTB3	0	0.05	0	0.02	1	Human_GW18
CHD1	0	0.1	0	0	1	Human_GW18
ST8SIA4	0	0.33	0	0	1	Human_GW18
PJA2	0	0.05	0	0	1	Human_GW18
TRIM36	0.07	0.07	0	0	1	Human_GW18
CCDC112	0	0.04	0	0	1	Human_GW18
CDO1	0	0	0.51	0	1	Human_GW18
ATG12	0	0.1	0	0	1	Human_GW18
SEMA6A	0	0	0.25	0	1	Human_GW18
ALDH7A1	0	0.31	0	0	1	Human_GW18
UQCRQ	0.16	0	0	0	1	Human_GW18
UBE2B	0	0.09	0	0	1	Human_GW18
HNRNPA0	0.18	0	0.03	0	1	Human_GW18
PAIP2	0	0.01	0	0	1	Human_GW18
UBE2D2	0	0	0	0	1	Human_GW18
PFDN1	0	0.05	0	0	1	Human_GW18
PCDHGA10	0	0.32	0.28	0	1	Human_GW18
GNPDA1	0	0	0.6	0	1	Human_GW18
NDFIP1	0	0	0.2	0	1	Human_GW18
GPR151	0	0	0.92	0	1	Human_GW18
PPP2R2B	0.25	0	0.5	0	1	Human_GW18
DPYSL3	0	0.06	0	0	1	Human_GW18
JAKMIP2	0	0.06	0	0	1	Human_GW18
CSNK1A1	0	0.1	0	0	1	Human_GW18
RPS14	0.52	0	0.11	0.03	1	Human_GW18
DCTN4	0	0.39	0	0	1	Human_GW18
RNF145	0.26	0.21	0	0	1	Human_GW18
NPM1	0	0	0.04	0	1	Human_GW18
FBXW11	0	0.13	0	0	1	Human_GW18
DUSP1	0	0.52	0	0	1	Human_GW18
THOC3	0	0.42	0	0	1	Human_GW18
SNCB	0.52	0	0.49	0	1	Human_GW18
UIMC1	0	0.11	0.37	0	1	Human_GW18
DBN1	0	0.02	0	0	1	Human_GW18
HNRNPAB	0	0.13	0	0	1	Human_GW18
HNRNPH1	0	0.03	0	0	1	Human_GW18
MGAT4B	0	0.29	0	0.67	1	Human_GW18
RNF130	0	0.17	0	0	1	Human_GW18
HERC2	0	0.13	0	0	1	Human_GW18
UBE3A	0	0.03	0.09	0	1	Human_GW18
NDN	0	0.08	0	0.07	1	Human_GW18
KLF13	0	0.44	0	0.1	1	Human_GW18
ARHGAP11A	0	0	0.84	0	1	Human_GW18
SCG5	0	0	0	0.23	1	Human_GW18
KATNBL1	0	0.06	0	0	1	Human_GW18
MEIS2	0.67	0	0	0	1	Human_GW18
INO80	0	0.36	0	0.19	1	Human_GW18
RTF1	0	0	0.04	0	1	Human_GW18
TMEM87A	0	0.2	0	0.11	1	Human_GW18
EIF3J	0	0.1	0.13	0	1	Human_GW18
SHF	0	0.35	0	0.13	1	Human_GW18
MYEF2	0	0.14	0	0	1	Human_GW18
EID1	0	0	0.05	0	1	Human_GW18
SCG3	0	0.01	0	0	1	Human_GW18
MAPK6	0	0.19	0	0	1	Human_GW18
BNIP2	0	0.33	0	0	1	Human_GW18
VPS13C	0	0.07	0	0	1	Human_GW18
RAB8B	0	0.21	0	0	1	Human_GW18
HERC1	0	0.04	0	0.03	1	Human_GW18
PPIB	0	0.01	0	0.02	1	Human_GW18
OAZ2	0.52	0	0.16	0	1	Human_GW18
SPG21	0.63	0	0	0	1	Human_GW18
PDCD7	0	0.32	0	0.22	1	Human_GW18
IGDCC3	0	0.36	0	0.11	1	Human_GW18
RPL4	0.33	0	0	0	1	Human_GW18
CORO2B	0	0.31	0	0	1	Human_GW18
ANP32A	0	0.01	0.04	0	1	Human_GW18
RPLP1	0.25	0.17	0.13	0.16	1	Human_GW18
PKM	0	0	0.49	0	1	Human_GW18
COX5A	0.23	0	0.42	0	1	Human_GW18
IMP3	0	0.11	0	0	1	Human_GW18
UBE2Q2	0	0.34	0	0	1	Human_GW18
RCN2	0	0.16	0	0	1	Human_GW18
MEX3B	0	0.27	0	0.02	1	Human_GW18
RPS17	0.8	0	0.2	0	1	Human_GW18
IGF1R	0	0.27	0	0	1	Human_GW18
MEF2A	0	0.08	0.2	0	1	Human_GW18
APEX1	0	0.02	0	0	1	Human_GW18
ZNF219	0	0.38	0	0.18	1	Human_GW18
PABPN1	0	0.19	0	0.21	1	Human_GW18
NOVA1	0.08	0.28	0	0	1	Human_GW18
FOXG1	0	0.09	0	0	1	Human_GW18
STRN3	0	0.35	0	0	1	Human_GW18
NPAS3	0	0.09	0	0.04	1	Human_GW18
SNX6	0	0.07	0	0	1	Human_GW18
PSMA6	0	0.62	0	0.03	1	Human_GW18
ARF6	0	0.29	0	0.1	1	Human_GW18
TRIM9	0	0	0.63	0	1	Human_GW18
TXNDC16	0	0.3	0.01	0	1	Human_GW18
FERMT2	0	0.4	0	0	1	Human_GW18
KTN1	0	0.14	0	0	1	Human_GW18
DACT1	0	0.26	0	0.12	1	Human_GW18
RTN1	0	0	0.23	0	1	Human_GW18
MNAT1	0	0.21	0	0	1	Human_GW18
SYNE2	0	0.03	0	0	1	Human_GW18
AKAP5	0	0.11	0	0	1	Human_GW18
ZBTB1	0	0.25	0	0	1	Human_GW18
RPS27A	0.3	0.16	0.24	0.14	1	Human_GW18
VTI1B	0.2	0	0.42	0	1	Human_GW18
PNMA1	0	0.13	0	0	1	Human_GW18
FOS	0	0.05	0.02	0	1	Human_GW18
IRF2BPL	0	0.1	0	0	1	Human_GW18
NRXN3	0	0.03	0	0	1	Human_GW18
FOXN3	0	0.25	0	0	1	Human_GW18
CALM1	0	0	0.22	0	1	Human_GW18
MOAP1	0	0.07	0.17	0	1	Human_GW18
DDX24	0	0	0.12	0	1	Human_GW18
GLRX5	0	0.37	0	0.22	1	Human_GW18
BCL11B	0	0.05	0	0	1	Human_GW18
EVL	0	0.07	0	0.14	1	Human_GW18
YY1	0	0.12	0	0	1	Human_GW18
SLC25A29	0	0.29	0	0.32	1	Human_GW18
HSP90AA1	0	0.03	0	0.09	1	Human_GW18
CDC42BPB	0	0.32	0	0	1	Human_GW18
EIF5	0	0.03	0	0	1	Human_GW18
MARK3	0	0.1	0	0.04	1	Human_GW18
CKB	0	0	0	0	1	Human_GW18
AKT1	0	0.39	0	0.19	1	Human_GW18
BTBD6	0	0.32	0	0.12	1	Human_GW18
MTA1	0	0.38	0	0.21	1	Human_GW18
AGPAT5	0	0.41	0.15	0	1	Human_GW18
MSRA	0	0.01	0	0	1	Human_GW18
TNKS	0	0.24	0	0	1	Human_GW18
MICU3	0	0.2	0	0.17	1	Human_GW18
CNOT7	0	0.03	0.09	0	1	Human_GW18
PCM1	0.05	0.01	0	0	1	Human_GW18
DPYSL2	0	0.07	0	0	1	Human_GW18
STMN4	0.25	0	0.02	0	1	Human_GW18
CCDC25	0	0.11	0.35	0	1	Human_GW18
PNOC	0	0	0.58	0	1	Human_GW18
SARAF	0	0	0.21	0	1	Human_GW18
PPP2CB	0	0.25	0	0	1	Human_GW18
PURG	0	0.42	0	0.06	1	Human_GW18
HOOK3	0	0.16	0	0	1	Human_GW18
SNTG1	0	0.36	0	0	1	Human_GW18
PCMTD1	0	0.16	0	0	1	Human_GW18
TCEA1	0	0.05	0	0	1	Human_GW18
XKR4	0	0	0.45	0.15	1	Human_GW18
RPS20	0.71	0	0.13	0	1	Human_GW18
FAM110B	0	0.03	0.11	0	1	Human_GW18
RAB2A	0	0	0.05	0	1	Human_GW18
CHD7	0	0.36	0	0.05	1	Human_GW18
NKAIN3	0	0.4	0	0	1	Human_GW18
BHLHE22	0.69	0	0.12	0	1	Human_GW18
RPL7	0.62	0	0.09	0	1	Human_GW18
ZC2HC1A	0	0	0	0.06	1	Human_GW18
STMN2	0.07	0.21	0.25	0.2	1	Human_GW18
ZNF704	0	0.13	0	0	1	Human_GW18
FABP5	0	0	0.1	0	1	Human_GW18
RALYL	0.72	0	0	0	1	Human_GW18
RUNX1T1	0	0	0	0.03	1	Human_GW18
UQCRB	0.29	0	0.04	0	1	Human_GW18
PABPC1	0.06	0	0.1	0	1	Human_GW18
YWHAZ	0	0	0	0	1	Human_GW18
EIF3E	0.16	0	0	0	1	Human_GW18
MED30	0	0.12	0	0	1	Human_GW18
SQLE	0	0.06	0	0	1	Human_GW18
ASAP1	0	0.24	0	0	1	Human_GW18
SLA	0.65	0	0	0	1	Human_GW18
KHDRBS3	0	0	0.32	0.41	1	Human_GW18
LY6H	0	0	0.34	0	1	Human_GW18
TIGD5	0	0.4	0	0.05	1	Human_GW18
CYC1	0.5	0	0	0	1	Human_GW18
RPL8	0.13	0	0.19	0.02	1	Human_GW18
C8orf33	0	0.09	0.15	0	1	Human_GW18
KLF6	0	0.07	0	0	1	Human_GW18
UPF2	0	0.09	0	0	1	Human_GW18
FAM107B	0	0.39	0	0.04	1	Human_GW18
NMT2	0	0.24	0	0	1	Human_GW18
VIM	0	0	0.36	0.38	1	Human_GW18
OTUD1	0	0.41	0	0.42	1	Human_GW18
ARHGAP21	0	0.15	0	0.16	1	Human_GW18
EPC1	0	0	0	0	1	Human_GW18
CCDC7	0	0	0.72	0	1	Human_GW18
ITGB1	0	0.28	0	0	1	Human_GW18
HNRNPF	0	0.09	0	0.07	1	Human_GW18
ZNF32	0	0.1	0.04	0	1	Human_GW18
ZNF22	0	0.03	0	0	1	Human_GW18
PARG	0	0.34	0	0	1	Human_GW18
RPS24	0.21	0.22	0.23	0.22	1	Human_GW18
VDAC2	0	0	0.13	0	1	Human_GW18
PPA1	0	0	0.23	0	1	Human_GW18
HNRNPH3	0	0	0	0.06	1	Human_GW18
SIRT1	0	0.58	0	0.15	1	Human_GW18
ANK3	0.09	0	0.64	0	1	Human_GW18
TFAM	0	0.09	0	0	1	Human_GW18
UBE2D1	0	0	0.51	0	1	Human_GW18
CISD1	0	0	0.52	0	1	Human_GW18
PTEN	0	0.23	0	0.11	1	Human_GW18
TM9SF3	0	0.3	0	0	1	Human_GW18
FRAT1	0	0.44	0	0.14	1	Human_GW18
FRAT2	0	0.42	0	0.18	1	Human_GW18
INA	0	0.12	0	0	1	Human_GW18
MXI1	0	0.4	0	0.05	1	Human_GW18
SMNDC1	0	0.22	0	0	1	Human_GW18
SMC3	0	0	0.17	0	1	Human_GW18
ATRNL1	0	0.34	0	0.21	1	Human_GW18
TIAL1	0	0.07	0.09	0	1	Human_GW18
MCMBP	0	0.35	0	0	1	Human_GW18
CTBP2	0	0.31	0	0.07	1	Human_GW18
PPP2R2D	0	0.43	0	0.09	1	Human_GW18
DPYSL4	0	0.25	0	0	1	Human_GW18
TUBGCP2	0	0.01	0.54	0	1	Human_GW18
PPP6R2	0	0.32	0	0	1	Human_GW18
PIM3	0	0.43	0	0.2	1	Human_GW18
BRD1	0	0.66	0	0	1	Human_GW18
CERK	0	0.15	0	0.14	1	Human_GW18
FBLN1	0	0.4	0	0.12	1	Human_GW18
PHF21B	0	0.33	0	0	1	Human_GW18
SMDT1	0.1	0	0.09	0	1	Human_GW18
TNRC6B	0	0.02	0	0	1	Human_GW18
RPL3	0.2	0.04	0	0.15	1	Human_GW18
CBX6	0	0.2	0.16	0	1	Human_GW18
SUN2	0	0.19	0.02	0.07	1	Human_GW18
DDX17	0	0.02	0	0	1	Human_GW18
CSNK1E	0	0.11	0	0.02	1	Human_GW18
EIF3L	0.11	0	0.1	0	1	Human_GW18
RBFOX2	0	0	0.04	0	1	Human_GW18
YWHAH	0	0.22	0	0	1	Human_GW18
MORC2	0	0.44	0.06	0	1	Human_GW18
RHBDD3	0	0	0.7	0	1	Human_GW18
SMARCB1	0	0	0.04	0	1	Human_GW18
MIF	0	0.01	0.41	0	1	Human_GW18
RANBP1	0.36	0	0	0	1	Human_GW18
CECR2	0	0.61	0	0.2	1	Human_GW18
KIZ	0	0.4	0	0	1	Human_GW18
INSM1	0	0.61	0	0	1	Human_GW18
CRNKL1	0	0.26	0	0	1	Human_GW18
SNAP25	0	0	0.48	0	1	Human_GW18
RNF24	0	0.33	0	0	1	Human_GW18
CENPB	0	0.43	0	0	1	Human_GW18
PTPRA	0	0.36	0	0	1	Human_GW18
FKBP1A	0.48	0	0	0	1	Human_GW18
SOX12	0	0.27	0	0.13	1	Human_GW18
ZCCHC3	0	0.7	0	0	1	Human_GW18
CCM2L	0	0	0.81	0.23	1	Human_GW18
ASXL1	0	0.39	0	0	1	Human_GW18
SCAND1	0	0	0.14	0	1	Human_GW18
MROH8	0	0.72	0	0	1	Human_GW18
SLC32A1	0	0.25	0	0	1	Human_GW18
TOP1	0	0.17	0	0	1	Human_GW18
SRSF6	0	0.52	0	0	1	Human_GW18
YWHAB	0	0	0.17	0	1	Human_GW18
DDX27	0	0.28	0	0	1	Human_GW18
ADNP	0	0.28	0	0.15	1	Human_GW18
PMEPA1	0	0.45	0	0.21	1	Human_GW18
LSM14B	0	0.33	0	0	1	Human_GW18
RPS21	0	0	0	0	1	Human_GW18
MRGBP	0	0.24	0	0.18	1	Human_GW18
YTHDF1	0	0.62	0	0.13	1	Human_GW18
NKAIN4	0	0.43	0	0.1	1	Human_GW18
KCNQ2	0	0.21	0	0.09	1	Human_GW18
EEF1A2	0	0	0	0.59	1	Human_GW18
PPDPF	0.02	0.06	0	0	1	Human_GW18
MRPL51	0	0.09	0	0.06	1	Human_GW18
CHD4	0	0.1	0	0	1	Human_GW18
MLF2	0	0.02	0	0	1	Human_GW18
PTMS	0	0.31	0	0.21	1	Human_GW18
ATN1	0	0.33	0	0	1	Human_GW18
LDHB	0	0	0.11	0.05	1	Human_GW18
CMAS	0	0	0.55	0	1	Human_GW18
PDZRN4	0	0.29	0	0	1	Human_GW18
YAF2	0	0.11	0	0	1	Human_GW18
SLC38A2	0	0.33	0	0	1	Human_GW18
CCDC184	0.22	0	0.48	0	1	Human_GW18
TUBA1A	0.08	0.24	0	0.24	1	Human_GW18
SMARCD1	0	0.12	0	0	1	Human_GW18
PFDN5	0.15	0	0	0	1	Human_GW18
PCBP2	0	0.13	0	0	1	Human_GW18
CBX5	0	0.03	0	0	1	Human_GW18
HNRNPA1	0.22	0	0	0.03	1	Human_GW18
RPS26	0	0	0	0	1	Human_GW18
RPL41	0.54	0	0.07	0	1	Human_GW18
R3HDM2	0	0.39	0	0	1	Human_GW18
KIF5A	0	0.4	0	0	1	Human_GW18
CNOT2	0	0.02	0.01	0	1	Human_GW18
KCNMB4	0	0.27	0	0.14	1	Human_GW18
RAB21	0	0.32	0	0.2	1	Human_GW18
ATXN7L3B	0	0	0.22	0	1	Human_GW18
KRR1	0	0.13	0	0	1	Human_GW18
NAP1L1	0.2	0	0.24	0	1	Human_GW18
OSBPL8	0	0	0.41	0	1	Human_GW18
CSRP2	0.72	0	0	0	1	Human_GW18
SYT1	0.05	0	0.24	0	1	Human_GW18
TSPAN19	0	0	0.94	0	1	Human_GW18
DCN	0.08	0	0.51	0.23	1	Human_GW18
BTG1	0	0.05	0	0	1	Human_GW18
NUDT4	0	0.18	0	0	1	Human_GW18
METAP2	0	0.04	0	0	1	Human_GW18
TMPO	0	0.2	0	0	1	Human_GW18
SLC25A3	0	0.04	0	0	1	Human_GW18
IGF1	0	0	0.66	0	1	Human_GW18
ASCL1	0	0.26	0	0.1	1	Human_GW18
FAM222A	0	0.75	0	0.01	1	Human_GW18
ARPC3	0	0	0	0	1	Human_GW18
HECTD4	0	0.25	0	0	1	Human_GW18
RPL6	0.19	0.14	0.16	0.13	1	Human_GW18
PTPN11	0	0.12	0.24	0	1	Human_GW18
WSB2	0	0.37	0	0.15	1	Human_GW18
PEBP1	0	0	0.2	0	1	Human_GW18
SUDS3	0.2	0	0.3	0	1	Human_GW18
RPLP0	0.19	0	0	0	1	Human_GW18
SRSF9	0	0.19	0	0.03	1	Human_GW18
BCL7A	0	0.05	0.12	0	1	Human_GW18
RSRC2	0	0.01	0	0	1	Human_GW18
HIP1R	0	0.31	0	0	1	Human_GW18
UBC	0	0	0	0.03	1	Human_GW18
STX2	0	0.44	0	0	1	Human_GW18
ULK1	0	0.55	0	0	1	Human_GW18
FBRSL1	0	0.48	0	0.2	1	Human_GW18
MZT2B	0	0.05	0	0	1	Human_GW18
NIFK	0	0.11	0	0.06	1	Human_GW18
ZEB2	0	0.02	0	0	1	Human_GW18
KIF5C	0	0.08	0	0.08	1	Human_GW18
RND3	0	0.33	0	0.09	1	Human_GW18
PRPF40A	0	0.06	0	0	1	Human_GW18
RPRM	0.68	0	0	0	1	Human_GW18
TBR1	0.7	0	0	0	1	Human_GW18
CERS6	0	0.06	0.16	0	1	Human_GW18
KLHL23	0	0.05	0.17	0	1	Human_GW18
GAD1	0	0.01	0	0	1	Human_GW18
DYNC1I2	0	0.01	0	0	1	Human_GW18
DLX2	0	0.12	0	0	1	Human_GW18
SP9	0	0.51	0	0.2	1	Human_GW18
HNRNPA3	0	0	0	0	1	Human_GW18
PLEKHA3	0	0.26	0	0.03	1	Human_GW18
SESTD1	0	0.17	0	0.05	1	Human_GW18
ASNSD1	0	0.2	0	0	1	Human_GW18
ORMDL1	0	0.09	0	0	1	Human_GW18
SLC39A10	0	0.2	0	0	1	Human_GW18
HSPE1	0	0	0	0	1	Human_GW18
SATB2	0.66	0	0	0	1	Human_GW18
SPATS2L	0	0	0.45	0.02	1	Human_GW18
BMPR2	0	0.23	0	0	1	Human_GW18
NRP2	0	0	0.83	0	1	Human_GW18
EEF1B2	0	0	0.1	0	1	Human_GW18
KLF7	0	0.13	0	0	1	Human_GW18
ERBB4	0	0.01	0	0	1	Human_GW18
TMEM169	0.29	0.39	0	0	1	Human_GW18
XRCC5	0	0	0	0	1	Human_GW18
IGFBP2	0	0.31	0	0.22	1	Human_GW18
IGFBP5	0.72	0	0.16	0	1	Human_GW18
CUL3	0	0.33	0	0.07	1	Human_GW18
DNER	0	0.32	0	0	1	Human_GW18
NCL	0	0	0.03	0	1	Human_GW18
PTMA	0.27	0.2	0.25	0.2	1	Human_GW18
ARL4C	0	0.23	0	0.15	1	Human_GW18
SH3BP4	0	0.71	0	0	1	Human_GW18
ACKR3	0	0.04	0.22	0.34	1	Human_GW18
LRRFIP1	0	0.34	0	0	1	Human_GW18
HES6	0	0.1	0	0.13	1	Human_GW18
COX5B	0.24	0	0	0	1	Human_GW18
AFF3	0	0.29	0	0	1	Human_GW18
RPL31	0.75	0	0.15	0	1	Human_GW18
MAP4K4	0	0.15	0	0	1	Human_GW18
POU3F3	0	0.27	0	0	1	Human_GW18
NCK2	0	0.41	0	0.16	1	Human_GW18
LIMS1	0	0.38	0	0	1	Human_GW18
KCMF1	0	0.28	0	0.08	1	Human_GW18
TMSB10	0.18	0.23	0	0.2	1	Human_GW18
POLE4	0.32	0	0.36	0	1	Human_GW18
TIA1	0	0.09	0	0	1	Human_GW18
PCBP1	0	0.11	0	0.1	1	Human_GW18
AAK1	0	0.02	0.36	0	1	Human_GW18
GFPT1	0	0.24	0.08	0	1	Human_GW18
CNRIP1	0.11	0	0.57	0	1	Human_GW18
ACTR2	0	0.25	0	0	1	Human_GW18
COX7C	0.11	0	0.1	0	1	Human_GW18
USP34	0	0.15	0	0	1	Human_GW18
BCL11A	0	0.04	0	0	1	Human_GW18
CCDC88A	0	0	0	0.05	1	Human_GW18
NRXN1	0	0	0.01	0	1	Human_GW18
FBXO11	0	0.17	0	0.01	1	Human_GW18
MSH6	0	0.1	0.2	0	1	Human_GW18
CALM2	0.16	0	0.04	0	1	Human_GW18
THUMPD2	0	0.15	0.51	0	1	Human_GW18
SRSF7	0	0	0	0.01	1	Human_GW18
CEBPZ	0	0.07	0.19	0	1	Human_GW18
PPP1CB	0	0.21	0	0	1	Human_GW18
PPM1G	0	0.06	0	0	1	Human_GW18
ATAD2B	0	0.37	0	0.08	1	Human_GW18
RHOB	0	0.03	0	0.07	1	Human_GW18
ROCK2	0	0.28	0	0.08	1	Human_GW18
KCNF1	0	0.01	0.02	0.46	1	Human_GW18
PDIA6	0	0.07	0	0	1	Human_GW18
ODC1	0	0.3	0	0	1	Human_GW18
HPCAL1	0.69	0	0	0	1	Human_GW18
YWHAQ	0	0.01	0.09	0	1	Human_GW18
ASAP2	0	0.46	0	0.04	1	Human_GW18
KIDINS220	0	0	0	0	1	Human_GW18
SOX11	0	0	0	0.01	1	Human_GW18
B4GALNT4	0	0.43	0	0.22	1	Human_GW18
HRAS	0	0.33	0	0.16	1	Human_GW18
RPLP2	0.49	0	0.16	0	1	Human_GW18
BRSK2	0	0.26	0	0.2	1	Human_GW18
CD81	0	0.34	0	0.1	1	Human_GW18
CDKN1C	0	0.68	0	0.01	1	Human_GW18
CTTN	0	0.11	0.03	0	1	Human_GW18
ANKRD13D	0	0.31	0	0.12	1	Human_GW18
KDM2A	0	0.44	0	0.14	1	Human_GW18
CNIH2	0	0.09	0	0.2	1	Human_GW18
CFL1	0	0	0	0	1	Human_GW18
FAU	0.1	0.05	0.13	0.05	1	Human_GW18
PPP1R14B	0	0.44	0	0.22	1	Human_GW18
VEGFB	0	0.21	0.01	0.15	1	Human_GW18
RCOR2	0	0.45	0	0.2	1	Human_GW18
SLC3A2	0	0.29	0	0	1	Human_GW18
FTH1	0.31	0	0.23	0	1	Human_GW18
TMEM132A	0	0.17	0	0.17	1	Human_GW18
OSBP	0	0.29	0	0.34	1	Human_GW18
MED19	0	0.06	0.17	0	1	Human_GW18
FNBP4	0	0.05	0	0	1	Human_GW18
FJX1	0	0.27	0.04	0.11	1	Human_GW18
RPS13	0.2	0.14	0.11	0.11	1	Human_GW18
RPL27A	0.71	0	0.01	0	1	Human_GW18
EIF3F	0.21	0	0	0	1	Human_GW18
TAF10	0	0.63	0	0	1	Human_GW18
RNF169	0	0.44	0	0.2	1	Human_GW18
SPCS2	0	0	0.16	0	1	Human_GW18
RPS3	0.07	0.05	0.09	0.12	1	Human_GW18
RSF1	0	0.01	0.08	0	1	Human_GW18
CREBZF	0	0.19	0	0	1	Human_GW18
GRM5	0	0	0.56	0.2	1	Human_GW18
SRSF8	0.33	0	0.36	0.12	1	Human_GW18
FAM76B	0	0.23	0	0	1	Human_GW18
MAML2	0	0.47	0	0	1	Human_GW18
TMEM123	0	0.27	0	0	1	Human_GW18
GRIA4	0	0.15	0	0	1	Human_GW18
ELMOD1	0.71	0	0.15	0	1	Human_GW18
SLN	0.77	0	0	0	1	Human_GW18
RDX	0	0.04	0	0	1	Human_GW18
CRYAB	0	0.36	0.4	0	1	Human_GW18
RNF214	0	0.13	0.05	0	1	Human_GW18
KMT2A	0	0.16	0	0	1	Human_GW18
DDX6	0	0.1	0	0.01	1	Human_GW18
RPS25	0.2	0	0.13	0	1	Human_GW18
HSPA8	0	0	0.11	0	1	Human_GW18
FEZ1	0.09	0	0	0	1	Human_GW18
ETS1	0	0.46	0.16	0	1	Human_GW18
VPS26B	0	0.2	0	0.15	1	Human_GW18
NELFB	0	0.27	0	0.56	1	Human_GW18
TMEM203	0	0.28	0	0.18	1	Human_GW18
UBAC1	0	0.37	0	0.03	1	Human_GW18
CAMSAP1	0	0.26	0	0	1	Human_GW18
REXO4	0	0.06	0.31	0	1	Human_GW18
RPL7A	0	0.08	0.22	0.1	1	Human_GW18
RALGDS	0	0.31	0	0.08	1	Human_GW18
PRRC2B	0	0.13	0	0	1	Human_GW18
NCS1	0	0.19	0	0.29	1	Human_GW18
FNBP1	0	0.08	0.24	0	1	Human_GW18
SET	0	0.05	0	0	1	Human_GW18
RPL12	0.21	0	0.14	0	1	Human_GW18
MAPKAP1	0	0.14	0.46	0	1	Human_GW18
HSPA5	0	0.02	0	0	1	Human_GW18
RPL35	0.48	0	0	0	1	Human_GW18
PSMB7	0.4	0	0	0	1	Human_GW18
STRBP	0	0.02	0.32	0	1	Human_GW18
LHX6	0	0.05	0	0	1	Human_GW18
RAB14	0	0.14	0	0	1	Human_GW18
ZNF618	0	0.32	0	0	1	Human_GW18
KIAA1958	0	0.39	0	0.06	1	Human_GW18
PTBP3	0	0.3	0	0	1	Human_GW18
RAD23B	0	0.2	0	0	1	Human_GW18
ZNF462	0	0.07	0	0	1	Human_GW18
TMEFF1	0	0.74	0	0	1	Human_GW18
MSANTD3	0	0.45	0	0.07	1	Human_GW18
GABBR2	0	0	0.52	0.3	1	Human_GW18
XPA	0	0.13	0	0	1	Human_GW18
SHB	0	0.73	0	0	1	Human_GW18
CNTFR	0	0.32	0	0.2	1	Human_GW18
ENHO	0	0.22	0	0.21	1	Human_GW18
UBE2R2	0	0.34	0	0.05	1	Human_GW18
DNAJA1	0	0	0	0	1	Human_GW18
MOB3B	0	0.36	0	0.06	1	Human_GW18
TUSC1	0	0.42	0	0.18	1	Human_GW18
PSIP1	0	0.03	0	0	1	Human_GW18
NFIB	0	0.05	0	0	1	Human_GW18
PTPRD	0	0.14	0	0.01	1	Human_GW18
UHRF2	0	0.53	0	0	1	Human_GW18
KIAA2026	0	0.19	0	0	1	Human_GW18
TLE1	0	0.24	0	0.06	1	Human_GW18
HNRNPK	0	0	0	0	1	Human_GW18
AGTPBP1	0	0.36	0	0	1	Human_GW18
GOLM1	0	0.14	0	0.12	1	Human_GW18
GADD45G	0	0.5	0	0.05	1	Human_GW18
NFIL3	0	0.4	0	0.09	1	Human_GW18
CDC14B	0	0.71	0	0	1	Human_GW18
YWHAE	0	0	0.07	0	1	Human_GW18
PITPNA	0	0.37	0	0.18	1	Human_GW18
PAFAH1B1	0	0.11	0	0	1	Human_GW18
RPAIN	0	0	0.06	0	1	Human_GW18
NLRP1	0	0.3	0	0.19	1	Human_GW18
GABARAP	0.16	0.43	0	0	1	Human_GW18
CTDNEP1	0	0.36	0	0.15	1	Human_GW18
GPS2	0	0.44	0	0	1	Human_GW18
CHD3	0	0.23	0	0	1	Human_GW18
VAMP2	0.04	0	0.21	0	1	Human_GW18
RPL26	0.39	0.02	0.1	0	1	Human_GW18
MYH10	0	0.09	0	0	1	Human_GW18
SHISA6	0	0	0.81	0.25	1	Human_GW18
CENPV	0	0.08	0	0	1	Human_GW18
MPRIP	0	0.19	0	0	1	Human_GW18
RAI1	0	0.43	0	0.04	1	Human_GW18
RPL23A	0.46	0	0.03	0	1	Human_GW18
MYO18A	0	0.49	0	0	1	Human_GW18
SUZ12	0	0.3	0	0	1	Human_GW18
CDK5R1	0	0.02	0	0	1	Human_GW18
TMEM98	0	0.36	0	0	1	Human_GW18
AP2B1	0.1	0.01	0	0	1	Human_GW18
SYNRG	0.22	0.02	0	0	1	Human_GW18
DHX40	0	0.35	0.03	0	1	Human_GW18
MSI2	0	0.37	0	0	1	Human_GW18
MMD	0.07	0	0.56	0	1	Human_GW18
NME1	0	0	0.16	0	1	Human_GW18
SPAG9	0	0.11	0	0	1	Human_GW18
LUC7L3	0	0	0.17	0	1	Human_GW18
CBX1	0.1	0.02	0.23	0	1	Human_GW18
RPL23	0.12	0	0.16	0	1	Human_GW18
RPL19	0.16	0.12	0.08	0.14	1	Human_GW18
PPP1R1B	0.74	0	0	0	1	Human_GW18
THRA	0.18	0	0.2	0	1	Human_GW18
KRT10	0	0.05	0	0	1	Human_GW18
EIF1	0	0.02	0	0.05	1	Human_GW18
PLEKHH3	0	0.47	0	0.27	1	Human_GW18
RPL27	0.37	0	0	0	1	Human_GW18
RND2	0	0.57	0	0.13	1	Human_GW18
ARL4D	0	0.07	0	0	1	Human_GW18
FAM171A2	0	0.42	0	0.24	1	Human_GW18
NMT1	0	0.13	0	0	1	Human_GW18
MAPT	0	0	0.26	0	1	Human_GW18
KANSL1	0	0.18	0	0	1	Human_GW18
TLK2	0	0.41	0	0	1	Human_GW18
DDX5	0	0	0	0	1	Human_GW18
SMURF2	0	0.35	0	0.11	1	Human_GW18
CACNG4	0	0.09	0	0.17	1	Human_GW18
PSMD12	0	0.04	0	0.03	1	Human_GW18
RPL38	0.17	0	0	0	1	Human_GW18
NT5C	0	0.39	0	0	1	Human_GW18
SUMO2	0	0	0.07	0.01	1	Human_GW18
UBALD2	0	0.37	0	0.15	1	Human_GW18
MXRA7	0	0.36	0.07	0.09	1	Human_GW18
TNRC6C	0	0.04	0	0	1	Human_GW18
CBX4	0	0.36	0	0.18	1	Human_GW18
ACTG1	0	0.19	0.07	0.22	1	Human_GW18
TSPAN10	0.17	0	0.77	0	1	Human_GW18
ALYREF	0	0.41	0	0.23	1	Human_GW18
ANAPC11	0.16	0	0.04	0	1	Human_GW18
MAFG	0	0.41	0	0.19	1	Human_GW18
RAC3	0.59	0	0	0	1	Human_GW18
RFNG	0	0.38	0	0.11	1	Human_GW18
WDR45B	0	0.17	0	0	1	Human_GW18
MRPL57	0.07	0	0.3	0	1	Human_GW18
MPHOSPH8	0	0.01	0	0	1	Human_GW18
AMER2	0	0.23	0	0.1	1	Human_GW18
RPL21	0.39	0.06	0.08	0.06	1	Human_GW18
POLR1D	0	0.17	0	0	1	Human_GW18
TSC22D1	0	0	0	0	1	Human_GW18
TPT1	0	0.01	0	0.07	1	Human_GW18
ZC3H13	0	0.01	0.08	0	1	Human_GW18
PIBF1	0	0.24	0	0	1	Human_GW18
KCTD12	0.01	0	0.52	0.04	1	Human_GW18
MYCBP2	0	0.02	0	0	1	Human_GW18
SLAIN1	0	0.37	0	0.16	1	Human_GW18
RBM26	0	0.18	0	0.11	1	Human_GW18
SPRY2	0	0.28	0.11	0	1	Human_GW18
TM9SF2	0	0.3	0	0	1	Human_GW18
EFNB2	0	0.19	0	0.18	1	Human_GW18
ARGLU1	0	0.02	0.03	0	1	Human_GW18
CARS2	0	0.52	0	0	1	Human_GW18
ING1	0	0.36	0	0.04	1	Human_GW18
ANKRD10	0	0.21	0	0	1	Human_GW18
SOX1	0	0.67	0	0.16	1	Human_GW18
LAMP1	0	0.38	0	0.19	1	Human_GW18
UPF3A	0	0.07	0	0	1	Human_GW18
CCBE1	0.73	0	0	0	1	Human_GW18
NEDD4L	0	0.16	0	0.06	1	Human_GW18
TXNL1	0	0	0	0.04	1	Human_GW18
TCF4	0	0	0	0	1	Human_GW18
MBD2	0	0.4	0	0.45	1	Human_GW18
GALNT1	0	0.38	0	0.06	1	Human_GW18
ZNF24	0	0.04	0.05	0	1	Human_GW18
CDH2	0	0.32	0	0	1	Human_GW18
MYL12B	0	0	0	0	1	Human_GW18
MTCL1	0	0.59	0	0	1	Human_GW18
ANKRD12	0	0	0.13	0	1	Human_GW18
RALBP1	0	0.26	0	0.08	1	Human_GW18
VAPA	0	0.01	0.05	0	1	Human_GW18
SPIRE1	0	0.35	0	0.02	1	Human_GW18
PSMG2	0	0.01	0.22	0	1	Human_GW18
LDLRAD4	0	0.34	0	0.09	1	Human_GW18
TPGS1	0	0.32	0	0.31	1	Human_GW18
HCN2	0	0	0.87	0	1	Human_GW18
PALM	0	0.22	0	0.11	1	Human_GW18
TMEM259	0	0.43	0	0.12	1	Human_GW18
GPX4	0.07	0	0	0	1	Human_GW18
CIRBP	0	0	0.02	0	1	Human_GW18
DAZAP1	0	0.42	0	0	1	Human_GW18
RPS15	0.38	0.1	0.24	0.04	1	Human_GW18
MEX3D	0	0.7	0	0.17	1	Human_GW18
ABHD17A	0	0.31	0.05	0	1	Human_GW18
CSNK1G2	0	0.35	0	0.23	1	Human_GW18
LSM7	0.08	0	0.09	0	1	Human_GW18
ATCAY	0	0.04	0	0	1	Human_GW18
EEF2	0.37	0	0.17	0	1	Human_GW18
MAP2K2	0	0.24	0	0.35	1	Human_GW18
MYDGF	0	0.07	0.3	0	1	Human_GW18
PTPRS	0	0.27	0	0	1	Human_GW18
RPL36	0.13	0	0	0	1	Human_GW18
NDUFA11	0.34	0	0.01	0	1	Human_GW18
ALKBH7	0	0.03	0	0	1	Human_GW18
KHSRP	0	0.41	0	0	1	Human_GW18
PET100	0	0.04	0.14	0	1	Human_GW18
CTXN1	0	0.16	0	0.02	1	Human_GW18
TIMM44	0	0.24	0	0	1	Human_GW18
ELAVL1	0	0.24	0	0	1	Human_GW18
HNRNPM	0	0	0	0	1	Human_GW18
PIN1	0.01	0.02	0	0	1	Human_GW18
CARM1	0	0.22	0.11	0	1	Human_GW18
ELAVL3	0	0.02	0	0	1	Human_GW18
CALR	0	0.03	0	0.05	1	Human_GW18
GADD45GIP1	0.36	0	0.29	0	1	Human_GW18
IER2	0	0.3	0	0	1	Human_GW18
RFX1	0	0.32	0	0	1	Human_GW18
PKN1	0	0.22	0	0.11	1	Human_GW18
BRD4	0	0.07	0	0.01	1	Human_GW18
AKAP8L	0	0.14	0	0.07	1	Human_GW18
TPM4	0	0.22	0	0	1	Human_GW18
ANO8	0	0.66	0	0.18	1	Human_GW18
RPL18A	0.29	0.11	0	0.15	1	Human_GW18
JUND	0	0.52	0	0	1	Human_GW18
LSM4	0	0	0.55	0	1	Human_GW18
SSBP4	0	0.22	0	0.1	1	Human_GW18
UBA52	0.31	0	0	0	1	Human_GW18
HOMER3	0	0.13	0.03	0.04	1	Human_GW18
NDUFA13	0.58	0	0	0	1	Human_GW18
ZNF708	0	0.28	0	0	1	Human_GW18
ZNF43	0	0.24	0	0	1	Human_GW18
URI1	0	0.43	0	0.17	1	Human_GW18
UBA2	0	0.03	0	0	1	Human_GW18
USF2	0	0.1	0.16	0	1	Human_GW18
TMEM147	0.36	0	0.2	0	1	Human_GW18
KMT2B	0	0.43	0	0	1	Human_GW18
NFKBID	0	0	0.93	0	1	Human_GW18
TBCB	0.13	0	0.03	0	1	Human_GW18
DPF1	0	0.02	0	0.12	1	Human_GW18
PSMD8	0	0.03	0	0	1	Human_GW18
HNRNPL	0	0.48	0	0	1	Human_GW18
LRFN1	0	0	0.79	0	1	Human_GW18
RPS16	0.23	0	0.08	0	1	Human_GW18
EID2	0	0.44	0	0.09	1	Human_GW18
RPS19	0.35	0.18	0.07	0.17	1	Human_GW18
ZNF428	0.16	0	0.21	0	1	Human_GW18
RTN2	0	0.36	0	0	1	Human_GW18
SNRPD2	0.44	0	0	0	1	Human_GW18
NOVA2	0	0.15	0	0.14	1	Human_GW18
NPAS1	0	0.37	0	0.16	1	Human_GW18
TMEM160	0.62	0	0	0	1	Human_GW18
MEIS3	0	0.39	0	0.2	1	Human_GW18
RPL18	0.09	0.12	0.15	0.15	1	Human_GW18
RPL13A	0.74	0	0.08	0	1	Human_GW18
RPS11	0.19	0.07	0	0.08	1	Human_GW18
PTOV1	0	0.27	0	0.17	1	Human_GW18
ETFB	0	0	0	0.1	1	Human_GW18
RPS9	0.22	0	0	0.05	1	Human_GW18
RPL28	0.22	0	0.19	0.01	1	Human_GW18
UBE2S	0	0.35	0	0.21	1	Human_GW18
ZNF579	0	0.31	0	0.23	1	Human_GW18
ZNF583	0	0.32	0	0	1	Human_GW18
RPS5	0.21	0	0	0.09	1	Human_GW18
TRIM28	0	0.13	0	0.13	1	Human_GW18
UBE2M	0	0.28	0	0.39	1	Human_GW18
RAB11FIP3	0	0.62	0.11	0	1	Human_GW18
UBE2I	0	0.04	0	0	1	Human_GW18
TSR3	0	0.3	0	0.29	1	Human_GW18
MAPK8IP3	0	0.45	0	0	1	Human_GW18
SPSB3	0	0.07	0	0	1	Human_GW18
NDUFB10	0	0	0.06	0	1	Human_GW18
RPS2	0.49	0	0.2	0	1	Human_GW18
PGP	0	0.21	0	0.14	1	Human_GW18
ECI1	0	0.5	0	0.16	1	Human_GW18
SRRM2	0	0.22	0	0.11	1	Human_GW18
FLYWCH2	0	0.43	0	0.07	1	Human_GW18
UBN1	0	0.42	0	0.02	1	Human_GW18
RBFOX1	0.16	0	0.45	0	1	Human_GW18
SNN	0	0.25	0	0	1	Human_GW18
ZC3H7A	0	0.3	0	0	1	Human_GW18
GSPT1	0	0.14	0	0.03	1	Human_GW18
PDXDC1	0	0.39	0	0	1	Human_GW18
RPS15A	0.28	0.09	0.13	0.04	1	Human_GW18
CRYM	0.64	0	0.12	0	1	Human_GW18
NDUFAB1	0	0.01	0.26	0	1	Human_GW18
TNRC6A	0	0.08	0	0	1	Human_GW18
SBK1	0	0.1	0	0	1	Human_GW18
YPEL3	0	0.3	0	0.09	1	Human_GW18
SEZ6L2	0	0.01	0	0	1	Human_GW18
MAZ	0	0.34	0	0.16	1	Human_GW18
TBC1D10B	0	0.43	0	0.17	1	Human_GW18
ZNF48	0	0.14	0	0.41	1	Human_GW18
BCL7C	0	0.54	0	0.16	1	Human_GW18
DNAJA2	0	0.13	0	0.06	1	Human_GW18
NETO2	0	0	0	0.08	1	Human_GW18
SIAH1	0	0.25	0	0	1	Human_GW18
N4BP1	0	0.38	0	0.05	1	Human_GW18
BRD7	0	0.38	0	0	1	Human_GW18
TOX3	0	0.16	0	0.17	1	Human_GW18
CRNDE	0	0.72	0	0	1	Human_GW18
HERPUD1	0	0.13	0	0	1	Human_GW18
CSNK2A2	0	0.32	0	0.22	1	Human_GW18
CDH11	0	0	0.75	0	1	Human_GW18
CTCF	0	0.12	0	0.15	1	Human_GW18
THAP11	0	0.37	0.1	0	1	Human_GW18
PSMD7	0	0.03	0.18	0	1	Human_GW18
ZNF821	0	0.12	0	0	1	Human_GW18
AP1G1	0	0.31	0	0	1	Human_GW18
EXOSC6	0	0.34	0	0.21	1	Human_GW18
ZNRF1	0	0.16	0	0.44	1	Human_GW18
CFDP1	0	0.05	0	0	1	Human_GW18
GABARAPL2	0	0	0.06	0	1	Human_GW18
MAF	0	0.09	0	0	1	Human_GW18
CMIP	0	0.06	0	0.01	1	Human_GW18
PLCG2	0	0.74	0	0	1	Human_GW18
COX4I1	0.27	0	0	0	1	Human_GW18
MAP1LC3B	0	0.02	0.14	0	1	Human_GW18
ZFPM1	0	0.42	0	0.23	1	Human_GW18
CBFA2T3	0	0.31	0	0	1	Human_GW18
ANKRD11	0	0.19	0	0	1	Human_GW18
RPL13	0.36	0	0.23	0	1	Human_GW18
GTPBP6	0	0.37	0	0.23	1	Human_GW18
DHRSX	0	0.41	0	0	1	Human_GW18
AP1S2	0.56	0	0	0	1	Human_GW18
PRDX4	0	0	0.58	0	1	Human_GW18
ARX	0	0.14	0	0.15	1	Human_GW18
CASK	0	0.23	0	0	1	Human_GW18
RBM3	0	0	0	0	1	Human_GW18
PCSK1N	0.52	0	0	0	1	Human_GW18
WNK3	0	0.02	0.1	0	1	Human_GW18
RPS4X	0.22	0.11	0.23	0.18	1	Human_GW18
POU3F4	0	0.26	0	0	1	Human_GW18
ZNF711	0	0.29	0	0	1	Human_GW18
NAP1L3	0	0	0.55	0	1	Human_GW18
TCEAL2	0	0	0.47	0	1	Human_GW18
TMSB15A	0.01	0	0	0	1	Human_GW18
BEX1	0	0	0.15	0	1	Human_GW18
TMSB15B	0	0.45	0	0	1	Human_GW18
PLS3	0	0.11	0	0	1	Human_GW18
PGRMC1	0	0.02	0.39	0	1	Human_GW18
RPL39	0.15	0.13	0.19	0.07	1	Human_GW18
STAG2	0	0.08	0.26	0	1	Human_GW18
RBMX	0	0.04	0	0	1	Human_GW18
AFF2	0	0.51	0	0	1	Human_GW18
TKTL1	0	0	0.85	0	1	Human_GW18
RPL10	0.3	0.25	0.24	0.25	1	Human_GW18
GDI1	0	0.09	0	0	1	Human_GW18
FAM50A	0	0.33	0	0.02	1	Human_GW18
LAGE3	0.61	0	0.13	0	1	Human_GW18
SLC25A6	0.35	0	0	0	1	Human_GW18
HNRNPU	0	0.02	0	0	2	Human_GW18
COX20	0	0.09	0	0	2	Human_GW18
CEP170	0	0.01	0.13	0	2	Human_GW18
OPN3	0	0.49	0	0.12	2	Human_GW18
ARID4B	0	0.04	0	0	2	Human_GW18
TOMM20	0	0.02	0	0	2	Human_GW18
IRF2BP2	0	0.34	0	0	2	Human_GW18
SIPA1L2	0	0.36	0	0.05	2	Human_GW18
EGLN1	0	0.12	0.36	0	2	Human_GW18
MGST3	0	0.07	0	0	2	Human_GW18
TMCO1	0	0.05	0.01	0	2	Human_GW18
POGK	0	0.39	0.01	0	2	Human_GW18
GPR161	0	0.06	0	0	2	Human_GW18
ATP1B1	0	0	0.58	0	2	Human_GW18
KIFAP3	0	0	0.4	0	2	Human_GW18
RC3H1	0	0.42	0	0	2	Human_GW18
IER5	0	0.45	0	0.17	2	Human_GW18
GLUL	0	0.22	0	0	2	Human_GW18
ZNF281	0	0.08	0	0	2	Human_GW18
ARL8A	0	0.08	0	0.11	2	Human_GW18
CD46	0	0.3	0	0.11	2	Human_GW18
LPGAT1	0	0.34	0	0	2	Human_GW18
RRP15	0	0.35	0	0	2	Human_GW18
DEGS1	0	0.18	0.23	0	2	Human_GW18
LBR	0	0.18	0	0	2	Human_GW18
ACBD3	0	0.42	0	0.08	2	Human_GW18
ARF1	0	0	0	0	2	Human_GW18
GUK1	0.33	0	0	0	2	Human_GW18
RNF187	0	0.27	0	0.29	2	Human_GW18
NOS1AP	0	0.38	0	0.14	2	Human_GW18
VANGL2	0	0.4	0	0	2	Human_GW18
HDGF	0	0.26	0	0.13	2	Human_GW18
NES	0	0.41	0	0.11	2	Human_GW18
MEX3A	0	0.05	0	0	2	Human_GW18
RPS27	0.19	0.17	0	0.1	2	Human_GW18
JTB	0.14	0	0.08	0	2	Human_GW18
MLLT11	0.21	0	0	0	2	Human_GW18
PLEKHO1	0	0.26	0	0.06	2	Human_GW18
RSBN1	0	0.06	0.04	0	2	Human_GW18
SLC25A24	0	0.64	0	0	2	Human_GW18
PTBP2	0	0.21	0	0	2	Human_GW18
CNN3	0	0.01	0.28	0	2	Human_GW18
FNBP1L	0	0.02	0	0	2	Human_GW18
GTF2B	0	0.06	0.18	0	2	Human_GW18
PKN2	0	0.32	0	0	2	Human_GW18
LMO4	0	0.1	0	0	2	Human_GW18
SH3GLB1	0	0.16	0	0	2	Human_GW18
ODF2L	0	0.05	0	0	2	Human_GW18
BCL10	0	0.07	0.22	0.03	2	Human_GW18
TTLL7	0	0.06	0.01	0	2	Human_GW18
IFI44	0	0.35	0	0	2	Human_GW18
WLS	0	0	0.63	0	2	Human_GW18
GADD45A	0	0.22	0	0.18	2	Human_GW18
SERBP1	0	0	0.15	0	2	Human_GW18
FAF1	0	0.27	0	0.37	2	Human_GW18
BEND5	0	0.2	0	0	2	Human_GW18
CMPK1	0	0.23	0	0	2	Human_GW18
UQCRH	0	0	0.13	0	2	Human_GW18
TSPAN1	0	0	0.93	0	2	Human_GW18
RPS8	0.17	0.17	0.24	0.18	2	Human_GW18
YBX1	0.54	0	0	0	2	Human_GW18
SMAP2	0	0.38	0	0.11	2	Human_GW18
MACF1	0	0.07	0	0	2	Human_GW18
POU3F1	0	0.72	0	0.21	2	Human_GW18
YRDC	0	0.54	0	0.19	2	Human_GW18
SFPQ	0	0.15	0	0.09	2	Human_GW18
PHC2	0	0.32	0	0.2	2	Human_GW18
FNDC5	0	0.66	0	0.21	2	Human_GW18
MARCKSL1	0.2	0	0	0	2	Human_GW18
KHDRBS1	0	0.13	0	0	2	Human_GW18
PTP4A2	0	0.18	0	0.18	2	Human_GW18
YTHDF2	0	0.02	0	0	2	Human_GW18
PHACTR4	0	0.25	0	0	2	Human_GW18
WASF2	0	0.59	0	0	2	Human_GW18
SH3BGRL3	0	0.18	0	0	2	Human_GW18
STMN1	0.21	0.23	0.2	0.24	2	Human_GW18
SRRM1	0	0	0.08	0	2	Human_GW18
SRSF10	0	0.05	0	0	2	Human_GW18
RPL11	0.21	0.23	0.23	0.22	2	Human_GW18
KDM1A	0	0.4	0	0.02	2	Human_GW18
HP1BP3	0.05	0.03	0	0	2	Human_GW18
PINK1	0	0	0.24	0.41	2	Human_GW18
CAMK2N1	0	0.05	0	0.13	2	Human_GW18
MAD2L2	0	0.08	0	0	2	Human_GW18
SRM	0	0.35	0	0.15	2	Human_GW18
KIF1B	0	0.21	0	0.1	2	Human_GW18
CTNNBIP1	0	0.28	0	0	2	Human_GW18
CLSTN1	0	0.11	0	0.14	2	Human_GW18
RERE	0.12	0.1	0	0	2	Human_GW18
ACOT7	0.57	0	0.13	0	2	Human_GW18
AJAP1	0	0	0.79	0	2	Human_GW18
RER1	0	0.25	0.06	0	2	Human_GW18
GNB1	0	0.05	0.06	0	2	Human_GW18
SSU72	0	0.09	0	0.02	2	Human_GW18
B3GALT6	0	0.21	0	0.58	2	Human_GW18
HES4	0	0.46	0	0.25	2	Human_GW18
RPL35A	0.2	0.13	0.04	0.09	2	Human_GW18
TCTEX1D2	0	0	0.52	0	2	Human_GW18
RNF168	0	0.38	0	0	2	Human_GW18
PAK2	0	0.05	0	0	2	Human_GW18
SENP5	0	0.34	0.16	0	2	Human_GW18
PPP1R2	0	0.1	0.12	0	2	Human_GW18
CCDC50	0	0.19	0	0	2	Human_GW18
SST	0	0	0.28	0.09	2	Human_GW18
EIF4A2	0.07	0	0	0	2	Human_GW18
ARPP21	0.63	0	0	0	2	Human_GW18
DYNC1LI1	0	0.17	0	0	2	Human_GW18
TOP2B	0	0.06	0	0	2	Human_GW18
RPL15	0.15	0.06	0.21	0.19	2	Human_GW18
KCNH8	0	0.49	0	0	2	Human_GW18
UBA5	0	0.2	0.35	0	2	Human_GW18
CDV3	0	0.55	0	0	2	Human_GW18
RBP1	0.09	0.01	0	0	2	Human_GW18
SLC25A36	0	0.29	0	0	2	Human_GW18
SPSB4	0	0.43	0	0.22	2	Human_GW18
PFN2	0	0.01	0	0	2	Human_GW18
SIAH2	0	0.44	0.01	0.03	2	Human_GW18
DHX36	0	0.06	0	0	2	Human_GW18
CCNL1	0	0.21	0	0	2	Human_GW18
SEC62	0	0.02	0.01	0	2	Human_GW18
RPL22L1	0	0.2	0.15	0	2	Human_GW18
TBL1XR1	0	0.31	0	0	2	Human_GW18
ZNF639	0	0.52	0	0	2	Human_GW18
NDUFB5	0	0.16	0	0	2	Human_GW18
FXR1	0	0.24	0	0	2	Human_GW18
SOX2	0	0.05	0	0	2	Human_GW18
MAGEF1	0	0.04	0.17	0	2	Human_GW18
TRA2B	0	0.01	0	0	2	Human_GW18
ACVR2B	0	0.28	0	0.18	2	Human_GW18
RPSA	0.05	0	0	0.07	2	Human_GW18
EIF1B	0	0	0	0	2	Human_GW18
TMEM158	0	0.29	0.2	0.05	2	Human_GW18
SMARCC1	0	0.1	0	0	2	Human_GW18
NDUFAF3	0.16	0	0.4	0	2	Human_GW18
CAMKV	0.66	0	0.07	0	2	Human_GW18
GNAI2	0	0.43	0	0.2	2	Human_GW18
RBM15B	0	0.29	0	0.22	2	Human_GW18
RPL29	0.13	0.09	0.11	0.11	2	Human_GW18
NT5DC2	0	0.15	0	0.2	2	Human_GW18
CADPS	0	0.04	0	0.05	2	Human_GW18
ARL6IP5	0	0	0.49	0	2	Human_GW18
FRMD4B	0.47	0	0.38	0	2	Human_GW18
CHL1	0	0	0.57	0	2	Human_GW18
GRM7	0.18	0	0.75	0	2	Human_GW18
VGLL4	0	0.13	0	0	2	Human_GW18
RPL32	0.27	0.21	0.22	0.21	2	Human_GW18
LSM3	0.1	0	0.13	0	2	Human_GW18
GRIP2	0	0	0.59	0	2	Human_GW18
MGLL	0	0	0.67	0	2	Human_GW18
OSBPL11	0.19	0.37	0	0	2	Human_GW18
SNX4	0	0.12	0	0	2	Human_GW18
GAP43	0.35	0	0	0	2	Human_GW18
TAGLN3	0	0	0	0.08	2	Human_GW18
TRMT10C	0	0.04	0	0.03	2	Human_GW18
SENP7	0	0.11	0	0	2	Human_GW18
PRMT2	0	0.03	0	0	2	Human_GW18
HMGN1	0	0	0.05	0	2	Human_GW18
KCNJ6	0	0	0.65	0	2	Human_GW18
CBR1	0	0.32	0.47	0	2	Human_GW18
SON	0	0	0	0	2	Human_GW18
PAXBP1	0	0.53	0	0	2	Human_GW18
BTG3	0	0.21	0.25	0	2	Human_GW18
CXADR	0.3	0	0.4	0	2	Human_GW18
COX19	0	0.1	0.39	0	2	Human_GW18
ELFN1	0	0.31	0	0	2	Human_GW18
MAD1L1	0	0	0.67	0	2	Human_GW18
TNRC18	0	0.42	0	0.15	2	Human_GW18
ACTB	0	0.05	0.12	0	2	Human_GW18
FSCN1	0	0.12	0	0	2	Human_GW18
RAC1	0	0.24	0	0.06	2	Human_GW18
BRI3	0	0.36	0	0.29	2	Human_GW18
PPP1R35	0	0.61	0	0.13	2	Human_GW18
MOSPD3	0	0.02	0.52	0	2	Human_GW18
GNB2	0	0.2	0	0	2	Human_GW18
CUX1	0	0.13	0	0	2	Human_GW18
SH2B2	0	0.43	0	0.34	2	Human_GW18
PRKRIP1	0	0.31	0	0	2	Human_GW18
VPS37D	0	0.42	0	0.08	2	Human_GW18
ZNF92	0	0.18	0	0.08	2	Human_GW18
CHCHD2	0	0	0.11	0	2	Human_GW18
SEC61G	0	0.01	0	0	2	Human_GW18
VSTM2A	0.01	0	0.48	0.06	2	Human_GW18
RALA	0	0.07	0.03	0	2	Human_GW18
RP9	0	0.23	0.04	0	2	Human_GW18
NEUROD6	0.65	0	0	0.18	2	Human_GW18
CBX3	0	0.21	0	0	2	Human_GW18
HNRNPA2B1	0	0	0	0	2	Human_GW18
TRA2A	0	0.09	0.31	0	2	Human_GW18
KLHL7	0	0.21	0	0	2	Human_GW18
PHF14	0	0	0.14	0	2	Human_GW18
NXPH1	0	0	0.62	0	2	Human_GW18
DLX5	0	0.01	0	0	2	Human_GW18
DLX6	0	0.37	0	0	2	Human_GW18
FAM133B	0	0.07	0.06	0	2	Human_GW18
CDK14	0	0.22	0	0	2	Human_GW18
SEMA3A	0.28	0	0.35	0.16	2	Human_GW18
PCLO	0	0	0.61	0	2	Human_GW18
RSBN1L	0	0.02	0.02	0	2	Human_GW18
PTPN12	0	0.3	0	0	2	Human_GW18
KMT2E	0	0.01	0	0	2	Human_GW18
CCDC71L	0	0.53	0	0.17	2	Human_GW18
PRKAR2B	0	0.22	0	0.04	2	Human_GW18
IFRD1	0	0.15	0.24	0	2	Human_GW18
CTTNBP2	0	0.09	0	0	2	Human_GW18
PTPRZ1	0.58	0	0.12	0	2	Human_GW18
WASL	0	0.16	0.1	0	2	Human_GW18
ARF5	0	0.06	0.01	0	2	Human_GW18
UBE2H	0	0.19	0	0.06	2	Human_GW18
MTPN	0	0.02	0.53	0	2	Human_GW18
TRIM24	0	0.39	0	0	2	Human_GW18
TMEM178B	0	0	0.62	0	2	Human_GW18
EPHB6	0.29	0	0.46	0	2	Human_GW18
EZH2	0	0.15	0.24	0	2	Human_GW18
ZNF775	0	0.67	0	0.2	2	Human_GW18
DPP6	0.08	0	0.55	0	2	Human_GW18
QKI	0	0.21	0	0.13	2	Human_GW18
WTAP	0	0.14	0	0	2	Human_GW18
AMD1	0	0.15	0	0	2	Human_GW18
FYN	0	0.16	0	0.15	2	Human_GW18
MARCKS	0	0.06	0	0.09	2	Human_GW18
HDAC2	0	0	0	0	2	Human_GW18
HSF2	0	0.24	0	0.04	2	Human_GW18
FABP7	0.14	0	0	0	2	Human_GW18
RSPO3	0.7	0	0	0	2	Human_GW18
RPS12	0.15	0.12	0.21	0.07	2	Human_GW18
CITED2	0	0.39	0	0.07	2	Human_GW18
PNRC1	0	0.25	0	0	2	Human_GW18
AKIRIN2	0	0.21	0	0.09	2	Human_GW18
LCA5	0	0.45	0	0	2	Human_GW18
COX7A2	0.26	0	0.05	0	2	Human_GW18
EEF1A1	0.1	0.25	0.24	0.25	2	Human_GW18
HSP90AB1	0	0	0.21	0	2	Human_GW18
RRP36	0	0.39	0	0.19	2	Human_GW18
RPL7L1	0	0.01	0	0	2	Human_GW18
TBCC	0	0.1	0	0	2	Human_GW18
ZFAND3	0	0.42	0	0	2	Human_GW18
RPL10A	0.22	0	0	0	2	Human_GW18
RPS10	0.41	0	0	0	2	Human_GW18
NUDT3	0	0	0.11	0	2	Human_GW18
CUTA	0.2	0	0.2	0	2	Human_GW18
RPS18	0.28	0.16	0.21	0.21	2	Human_GW18
HSPA1A	0	0.13	0	0.73	2	Human_GW18
DDAH2	0	0	0	0	2	Human_GW18
ATP6V1G2	0	0	0.42	0.13	2	Human_GW18
TUBB	0.11	0.09	0	0.1	2	Human_GW18
SOX4	0	0.04	0	0	2	Human_GW18
DEK	0	0.05	0	0	2	Human_GW18
RANBP9	0	0.45	0	0	2	Human_GW18
NOL7	0	0.07	0.31	0	2	Human_GW18
PRPF4B	0	0.1	0.09	0	2	Human_GW18
PXDC1	0	0.47	0	0.24	2	Human_GW18
TUBB2B	0.04	0.03	0	0	2	Human_GW18
MXD4	0	0.38	0	0	2	Human_GW18
HTT	0	0.32	0	0	2	Human_GW18
BLOC1S4	0	0.4	0	0.18	2	Human_GW18
CRMP1	0	0.02	0	0	2	Human_GW18
BOD1L1	0	0.08	0	0.21	2	Human_GW18
LDB2	0.71	0	0	0	2	Human_GW18
RPL9	0.16	0.14	0.08	0.17	2	Human_GW18
APBB2	0	0.32	0	0.06	2	Human_GW18
LIMCH1	0.56	0	0.14	0	2	Human_GW18
BEND4	0	0.3	0	0.46	2	Human_GW18
HNRNPDL	0	0	0	0	2	Human_GW18
HNRNPD	0	0.12	0	0.04	2	Human_GW18
CCNG2	0	0.26	0	0	2	Human_GW18
CCNI	0	0	0.19	0	2	Human_GW18
FAM47E	0.18	0	0.84	0	2	Human_GW18
SLC4A4	0	0.74	0	0.03	2	Human_GW18
YTHDC1	0	0.05	0.03	0	2	Human_GW18
CCSER1	0	0.13	0	0	2	Human_GW18
GRID2	0.06	0	0.66	0	2	Human_GW18
SMARCAD1	0	0.11	0.25	0	2	Human_GW18
RPL37A	0.16	0.18	0	0.15	2	Human_GW18
CXXC4	0	0.27	0	0	2	Human_GW18
RPL34	0.25	0.19	0.18	0.14	2	Human_GW18
ELF2	0	0.22	0	0	2	Human_GW18
SMARCA5	0	0.12	0	0	2	Human_GW18
DCLK2	0	0.4	0	0.04	2	Human_GW18
RPS3A	0.22	0.22	0.23	0.23	2	Human_GW18
GRIA2	0	0	0.59	0	2	Human_GW18
PALLD	0	0.4	0	0	2	Human_GW18
SAP30	0	0.7	0	0.17	2	Human_GW18
SPCS3	0	0.2	0.35	0	2	Human_GW18
CDKN2AIP	0	0.27	0	0	2	Human_GW18
BRD9	0	0.33	0	0	2	Human_GW18
ICE1	0	0.29	0	0	2	Human_GW18
MED10	0	0.02	0	0	2	Human_GW18
CCT5	0	0	0	0.07	2	Human_GW18
OTULIN	0	0.75	0	0	2	Human_GW18
BASP1	0	0.09	0	0.1	2	Human_GW18
DNAJC21	0	0.37	0	0.08	2	Human_GW18
RPL37	0	0.08	0	0.02	2	Human_GW18
MRPS30	0	0.23	0.14	0	2	Human_GW18
PLK2	0	0.03	0.39	0	2	Human_GW18
PDE4D	0	0.26	0	0.08	2	Human_GW18
KIF2A	0	0.07	0	0	2	Human_GW18
BDP1	0	0.06	0	0	2	Human_GW18
MAP1B	0	0.01	0	0	2	Human_GW18
ENC1	0	0	0.61	0	2	Human_GW18
NSA2	0	0.04	0	0	2	Human_GW18
TBCA	0	0	0	0	2	Human_GW18
RPS23	0.19	0.19	0.22	0.17	2	Human_GW18
VCAN	0	0.03	0	0	2	Human_GW18
MEF2C	0	0	0.45	0	2	Human_GW18
ARRDC3	0	0.29	0.01	0	2	Human_GW18
RHOBTB3	0	0.19	0	0	2	Human_GW18
ST8SIA4	0	0.37	0	0.04	2	Human_GW18
PJA2	0	0.1	0	0	2	Human_GW18
TRIM36	0.04	0.18	0	0	2	Human_GW18
CCDC112	0	0.05	0	0	2	Human_GW18
AP3S1	0.04	0	0.15	0	2	Human_GW18
DDX46	0	0	0.27	0	2	Human_GW18
HNRNPA0	0.24	0	0	0	2	Human_GW18
UBE2D2	0	0.03	0	0	2	Human_GW18
HBEGF	0	0	0.86	0.14	2	Human_GW18
PCDHGA10	0	0.45	0	0	2	Human_GW18
NDFIP1	0.05	0	0.31	0	2	Human_GW18
PPP2R2B	0.12	0	0.62	0	2	Human_GW18
DPYSL3	0	0.1	0	0	2	Human_GW18
RPS14	0.38	0	0.11	0.04	2	Human_GW18
DCTN4	0	0.37	0	0	2	Human_GW18
RNF145	0	0.22	0	0	2	Human_GW18
NPM1	0	0	0	0	2	Human_GW18
FBXW11	0	0.13	0.26	0	2	Human_GW18
UBTD2	0	0.28	0	0	2	Human_GW18
DUSP1	0	0.55	0	0.06	2	Human_GW18
PRELID1	0.41	0	0	0	2	Human_GW18
HNRNPAB	0	0.15	0	0	2	Human_GW18
HNRNPH1	0	0.06	0	0	2	Human_GW18
MGAT4B	0	0.32	0	0.43	2	Human_GW18
HERC2	0.16	0.1	0	0	2	Human_GW18
SNRPN	0	0	0.03	0	2	Human_GW18
NDN	0	0.05	0	0.01	2	Human_GW18
KLF13	0	0.63	0	0.1	2	Human_GW18
SCG5	0	0	0.06	0.02	2	Human_GW18
KATNBL1	0	0.09	0	0	2	Human_GW18
MEIS2	0.67	0	0	0	2	Human_GW18
INO80	0	0.38	0	0.14	2	Human_GW18
RTF1	0	0	0.09	0	2	Human_GW18
EIF3J	0	0.03	0.53	0	2	Human_GW18
SHF	0	0.21	0	0.14	2	Human_GW18
MYEF2	0	0.12	0	0	2	Human_GW18
EID1	0	0	0.08	0	2	Human_GW18
COPS2	0	0.08	0.1	0	2	Human_GW18
MAPK6	0	0.17	0	0	2	Human_GW18
BNIP2	0	0.6	0	0	2	Human_GW18
TPM1	0	0	0.28	0	2	Human_GW18
RAB8B	0	0.17	0	0	2	Human_GW18
USP3	0	0.07	0.19	0	2	Human_GW18
PPIB	0	0.01	0	0	2	Human_GW18
OAZ2	0.47	0	0.1	0	2	Human_GW18
PDCD7	0	0.36	0.03	0.12	2	Human_GW18
RPL4	0.28	0	0	0	2	Human_GW18
CORO2B	0	0.32	0	0	2	Human_GW18
RPLP1	0.2	0.16	0.16	0.18	2	Human_GW18
TLE3	0	0.62	0	0	2	Human_GW18
PKM	0	0	0.59	0	2	Human_GW18
COX5A	0	0	0.5	0	2	Human_GW18
IMP3	0	0.04	0.19	0	2	Human_GW18
UBE2Q2	0	0.3	0	0	2	Human_GW18
RCN2	0	0.15	0	0	2	Human_GW18
MEX3B	0	0.24	0	0	2	Human_GW18
RPS17	0.79	0	0.17	0	2	Human_GW18
MEF2A	0	0	0.52	0	2	Human_GW18
APEX1	0	0.02	0	0	2	Human_GW18
ZNF219	0	0.61	0	0.19	2	Human_GW18
PABPN1	0	0.17	0	0.17	2	Human_GW18
NOVA1	0	0.11	0	0	2	Human_GW18
FOXG1	0	0.05	0	0	2	Human_GW18
STRN3	0	0.32	0	0	2	Human_GW18
NPAS3	0	0.06	0	0.06	2	Human_GW18
SNX6	0	0.05	0	0	2	Human_GW18
ARF6	0	0.27	0	0.16	2	Human_GW18
ATL1	0	0.07	0	0	2	Human_GW18
TXNDC16	0	0.3	0.22	0	2	Human_GW18
FERMT2	0	0.45	0	0.17	2	Human_GW18
KTN1	0	0.2	0	0	2	Human_GW18
EXOC5	0	0.09	0.24	0	2	Human_GW18
DACT1	0	0.28	0	0.05	2	Human_GW18
RTN1	0	0	0.24	0	2	Human_GW18
MNAT1	0	0.27	0	0	2	Human_GW18
HIF1A	0	0.18	0	0	2	Human_GW18
SYNE2	0	0.04	0	0	2	Human_GW18
AKAP5	0	0.06	0	0	2	Human_GW18
ZBTB1	0	0.5	0	0	2	Human_GW18
RPS27A	0.27	0.14	0.24	0.14	2	Human_GW18
FOS	0	0.05	0	0	2	Human_GW18
IRF2BPL	0	0.15	0	0.01	2	Human_GW18
FOXN3	0	0.23	0	0.02	2	Human_GW18
CALM1	0	0	0.21	0	2	Human_GW18
DDX24	0	0	0.19	0	2	Human_GW18
GLRX5	0	0.34	0	0.41	2	Human_GW18
PAPOLA	0	0.07	0	0	2	Human_GW18
BCL11B	0	0.1	0	0	2	Human_GW18
EVL	0	0.04	0	0	2	Human_GW18
YY1	0	0.04	0	0	2	Human_GW18
SLC25A29	0	0.37	0	0.2	2	Human_GW18
DYNC1H1	0.05	0.01	0	0	2	Human_GW18
HSP90AA1	0	0.02	0	0.06	2	Human_GW18
CDC42BPB	0	0.31	0	0.1	2	Human_GW18
EIF5	0	0.01	0	0	2	Human_GW18
MARK3	0	0.1	0	0.07	2	Human_GW18
KLC1	0.37	0	0	0	2	Human_GW18
AKT1	0	0.31	0	0.21	2	Human_GW18
BTBD6	0	0.29	0	0.2	2	Human_GW18
MTA1	0	0.31	0	0	2	Human_GW18
AGPAT5	0	0.38	0.21	0	2	Human_GW18
MSRA	0	0.03	0.03	0	2	Human_GW18
MICU3	0	0.33	0.12	0	2	Human_GW18
CNOT7	0	0.08	0	0	2	Human_GW18
PPP2R2A	0	0.23	0	0	2	Human_GW18
DPYSL2	0	0.11	0	0	2	Human_GW18
STMN4	0.3	0	0.02	0	2	Human_GW18
PNOC	0	0	0.63	0	2	Human_GW18
SARAF	0	0	0.25	0	2	Human_GW18
PPP2CB	0	0.35	0	0.01	2	Human_GW18
PURG	0	0.37	0	0.18	2	Human_GW18
WRN	0	0.47	0	0	2	Human_GW18
SFRP1	0	0.26	0	0.19	2	Human_GW18
HOOK3	0	0.18	0	0	2	Human_GW18
SNTG1	0	0.34	0	0	2	Human_GW18
TCEA1	0	0.03	0.01	0	2	Human_GW18
RPS20	0.66	0	0.14	0	2	Human_GW18
RAB2A	0	0	0	0	2	Human_GW18
CHD7	0	0.41	0	0	2	Human_GW18
NKAIN3	0	0.39	0	0	2	Human_GW18
BHLHE22	0.71	0	0.16	0	2	Human_GW18
COPS5	0	0	0.08	0.06	2	Human_GW18
RPL7	0.54	0	0.07	0	2	Human_GW18
ZNF704	0	0.13	0	0	2	Human_GW18
RALYL	0.67	0	0.09	0	2	Human_GW18
RUNX1T1	0	0	0	0	2	Human_GW18
UQCRB	0.3	0	0	0	2	Human_GW18
PABPC1	0	0.01	0	0	2	Human_GW18
EIF3E	0.07	0	0	0	2	Human_GW18
MED30	0	0.07	0.08	0	2	Human_GW18
SQLE	0.12	0.06	0	0	2	Human_GW18
ASAP1	0	0.21	0	0	2	Human_GW18
SLA	0.62	0	0	0	2	Human_GW18
KHDRBS3	0	0	0.28	0.17	2	Human_GW18
LY6H	0.04	0	0.31	0	2	Human_GW18
TIGD5	0	0.43	0	0	2	Human_GW18
EXOSC4	0.04	0.01	0.48	0	2	Human_GW18
DGAT1	0	0	0	0.74	2	Human_GW18
RPL8	0.09	0	0.11	0	2	Human_GW18
C8orf33	0	0.18	0.22	0	2	Human_GW18
KLF6	0	0.07	0	0	2	Human_GW18
RBM17	0	0.05	0.04	0	2	Human_GW18
UPF2	0	0.13	0	0	2	Human_GW18
FAM107B	0	0.33	0	0	2	Human_GW18
NMT2	0.07	0.08	0	0	2	Human_GW18
VIM	0	0	0.42	0.3	2	Human_GW18
MSRB2	0	0.32	0	0	2	Human_GW18
ARHGAP21	0	0.23	0	0.06	2	Human_GW18
ITGB1	0	0.25	0	0	2	Human_GW18
HNRNPF	0	0.05	0	0	2	Human_GW18
ZNF22	0	0.03	0	0	2	Human_GW18
PARG	0	0.43	0	0	2	Human_GW18
RPS24	0.2	0.21	0.23	0.22	2	Human_GW18
COMTD1	0.42	0	0.61	0	2	Human_GW18
CAMK2G	0	0	0.62	0	2	Human_GW18
PPA1	0	0.02	0.06	0	2	Human_GW18
DDX50	0	0.26	0	0	2	Human_GW18
HNRNPH3	0	0	0.1	0	2	Human_GW18
ANK3	0.05	0	0.55	0	2	Human_GW18
UBE2D1	0	0	0.69	0	2	Human_GW18
CISD1	0.05	0	0.59	0	2	Human_GW18
PTEN	0	0.17	0.16	0	2	Human_GW18
FRAT1	0	0.34	0	0.16	2	Human_GW18
FRAT2	0	0.38	0	0.15	2	Human_GW18
INA	0	0.08	0	0	2	Human_GW18
MXI1	0	0.44	0	0.07	2	Human_GW18
SMNDC1	0	0.26	0	0	2	Human_GW18
ATRNL1	0	0.17	0	0.21	2	Human_GW18
PRDX3	0	0.01	0.16	0	2	Human_GW18
TIAL1	0	0.21	0	0	2	Human_GW18
MCMBP	0	0.38	0	0.14	2	Human_GW18
CTBP2	0	0.19	0	0.04	2	Human_GW18
UROS	0.09	0	0.52	0	2	Human_GW18
PPP2R2D	0	0.42	0	0.14	2	Human_GW18
DPYSL4	0	0.23	0	0	2	Human_GW18
ECHS1	0	0.05	0.17	0	2	Human_GW18
PPP6R2	0	0.26	0.13	0	2	Human_GW18
BRD1	0	0.47	0	0	2	Human_GW18
CERK	0	0.26	0	0	2	Human_GW18
ATXN10	0	0.02	0.19	0	2	Human_GW18
FBLN1	0	0.38	0	0.26	2	Human_GW18
PHF21B	0	0.43	0	0	2	Human_GW18
SMDT1	0.08	0	0.02	0	2	Human_GW18
TNRC6B	0	0.02	0	0	2	Human_GW18
RPL3	0.15	0.07	0	0.15	2	Human_GW18
CBX6	0	0.3	0.19	0	2	Human_GW18
JOSD1	0	0.61	0	0	2	Human_GW18
DDX17	0	0.04	0	0	2	Human_GW18
CSNK1E	0	0.16	0	0.05	2	Human_GW18
EIF3L	0.01	0	0.04	0	2	Human_GW18
RBFOX2	0	0	0.04	0	2	Human_GW18
YWHAH	0	0.3	0	0	2	Human_GW18
MORC2	0	0.32	0.05	0.02	2	Human_GW18
SMARCB1	0	0.03	0.13	0	2	Human_GW18
MIF	0	0	0.51	0	2	Human_GW18
CECR2	0	0.58	0	0.21	2	Human_GW18
CST3	0.52	0	0	0	2	Human_GW18
KIZ	0	0.35	0	0	2	Human_GW18
INSM1	0	0.71	0	0	2	Human_GW18
CRNKL1	0	0.22	0	0	2	Human_GW18
SNAP25	0	0	0.62	0	2	Human_GW18
RNF24	0	0.29	0	0	2	Human_GW18
CENPB	0	0.67	0	0	2	Human_GW18
PTPRA	0	0.32	0	0	2	Human_GW18
FKBP1A	0.23	0	0.08	0	2	Human_GW18
ZCCHC3	0	0.59	0	0	2	Human_GW18
ASXL1	0	0.27	0.12	0	2	Human_GW18
MAP1LC3A	0.21	0	0.4	0	2	Human_GW18
ERGIC3	0.16	0	0.21	0	2	Human_GW18
CPNE1	0	0.29	0	0.07	2	Human_GW18
RBM39	0	0.01	0	0	2	Human_GW18
SCAND1	0	0.02	0.08	0	2	Human_GW18
MROH8	0	0.73	0	0	2	Human_GW18
BLCAP	0.16	0	0.34	0	2	Human_GW18
SLC32A1	0	0.28	0	0	2	Human_GW18
TOP1	0	0.11	0	0	2	Human_GW18
PTPRT	0	0	0.56	0.07	2	Human_GW18
SRSF6	0	0.4	0	0	2	Human_GW18
YWHAB	0	0	0.2	0	2	Human_GW18
DDX27	0	0.27	0	0	2	Human_GW18
ADNP	0	0.26	0	0.1	2	Human_GW18
PMEPA1	0	0.45	0	0.22	2	Human_GW18
RPS21	0	0	0	0	2	Human_GW18
MRGBP	0	0.34	0	0.12	2	Human_GW18
NKAIN4	0	0.39	0	0.23	2	Human_GW18
KCNQ2	0	0.27	0	0.19	2	Human_GW18
EEF1A2	0	0	0.12	0.49	2	Human_GW18
PPDPF	0.03	0.09	0	0	2	Human_GW18
MLF2	0	0.1	0.03	0	2	Human_GW18
PTMS	0	0.32	0	0.19	2	Human_GW18
ATN1	0	0.44	0	0	2	Human_GW18
PHB2	0	0.15	0	0	2	Human_GW18
GRIN2B	0.02	0	0.44	0.17	2	Human_GW18
LMO3	0.53	0	0	0	2	Human_GW18
AEBP2	0	0.38	0	0.21	2	Human_GW18
LDHB	0	0	0.33	0	2	Human_GW18
PDZRN4	0	0.35	0	0.06	2	Human_GW18
YAF2	0	0.18	0	0	2	Human_GW18
SLC38A2	0	0.34	0	0	2	Human_GW18
CCNT1	0	0	0.71	0	2	Human_GW18
TUBA1A	0.08	0.24	0	0.24	2	Human_GW18
TMBIM6	0	0.01	0.03	0	2	Human_GW18
SMARCD1	0.02	0.14	0	0	2	Human_GW18
PFDN5	0.12	0	0	0	2	Human_GW18
PCBP2	0	0.08	0	0	2	Human_GW18
CBX5	0	0.04	0	0	2	Human_GW18
HNRNPA1	0.18	0	0	0.01	2	Human_GW18
BLOC1S1	0.42	0	0.05	0	2	Human_GW18
RPS26	0	0	0	0	2	Human_GW18
RPL41	0.43	0	0.16	0	2	Human_GW18
R3HDM2	0	0.4	0.12	0	2	Human_GW18
KIF5A	0	0.33	0	0	2	Human_GW18
USP15	0	0.13	0	0	2	Human_GW18
MDM2	0	0.53	0	0	2	Human_GW18
CNOT2	0	0.14	0	0	2	Human_GW18
RAB21	0	0.43	0	0.04	2	Human_GW18
ATXN7L3B	0	0.01	0.25	0	2	Human_GW18
NAP1L1	0.21	0	0.34	0	2	Human_GW18
CSRP2	0.72	0	0	0	2	Human_GW18
SYT1	0.02	0	0.29	0	2	Human_GW18
CCDC59	0	0.17	0	0.01	2	Human_GW18
DCN	0	0	0.66	0.24	2	Human_GW18
BTG1	0	0.07	0	0	2	Human_GW18
NUDT4	0	0.19	0	0	2	Human_GW18
METAP2	0	0.05	0	0	2	Human_GW18
TMPO	0	0.17	0	0	2	Human_GW18
SLC25A3	0	0.03	0.2	0	2	Human_GW18
IGF1	0	0	0.77	0	2	Human_GW18
ASCL1	0	0.15	0	0.08	2	Human_GW18
TDG	0	0.04	0	0	2	Human_GW18
HECTD4	0	0.17	0.03	0	2	Human_GW18
RPL6	0.16	0.15	0.17	0.13	2	Human_GW18
WSB2	0	0.27	0	0.13	2	Human_GW18
PEBP1	0	0	0.18	0	2	Human_GW18
SUDS3	0	0.02	0.45	0	2	Human_GW18
RPLP0	0.11	0	0	0	2	Human_GW18
SRSF9	0	0.21	0	0.07	2	Human_GW18
SPPL3	0	0.04	0	0.11	2	Human_GW18
BCL7A	0	0.11	0.04	0	2	Human_GW18
RSRC2	0	0.01	0	0	2	Human_GW18
HIP1R	0	0.26	0	0	2	Human_GW18
TMED2	0.08	0.03	0	0	2	Human_GW18
STX2	0	0.3	0.1	0	2	Human_GW18
ULK1	0	0.56	0	0	2	Human_GW18
FBRSL1	0	0.43	0	0.22	2	Human_GW18
MZT2B	0	0.14	0	0	2	Human_GW18
NIFK	0	0.03	0.2	0	2	Human_GW18
ZEB2	0	0.02	0	0	2	Human_GW18
KIF5C	0	0.14	0	0.1	2	Human_GW18
RND3	0	0.33	0	0.01	2	Human_GW18
CACNB4	0	0	0.65	0	2	Human_GW18
PRPF40A	0	0.05	0	0	2	Human_GW18
RPRM	0.74	0	0	0	2	Human_GW18
TBR1	0.67	0	0	0	2	Human_GW18
CERS6	0	0.06	0	0.01	2	Human_GW18
KLHL23	0	0.09	0.14	0	2	Human_GW18
GAD1	0	0	0.06	0	2	Human_GW18
DYNC1I2	0	0.02	0	0	2	Human_GW18
DLX2	0	0.09	0	0	2	Human_GW18
SP3	0	0.36	0	0	2	Human_GW18
SP9	0	0.62	0	0.16	2	Human_GW18
HNRNPA3	0	0	0	0	2	Human_GW18
SESTD1	0	0.11	0	0	2	Human_GW18
FRZB	0.73	0	0	0	2	Human_GW18
ASNSD1	0	0.19	0	0	2	Human_GW18
SLC39A10	0	0.1	0	0	2	Human_GW18
MOB4	0	0.06	0	0	2	Human_GW18
SATB2	0.68	0	0	0	2	Human_GW18
SPATS2L	0	0	0.59	0	2	Human_GW18
BMPR2	0	0.09	0	0	2	Human_GW18
NRP2	0	0	0.9	0	2	Human_GW18
EEF1B2	0	0	0.06	0	2	Human_GW18
ERBB4	0	0.02	0	0	2	Human_GW18
XRCC5	0	0.02	0	0	2	Human_GW18
IGFBP2	0	0.32	0	0.21	2	Human_GW18
IGFBP5	0.66	0	0.16	0	2	Human_GW18
CUL3	0	0.33	0	0	2	Human_GW18
MFF	0	0.07	0.19	0	2	Human_GW18
DNER	0	0.15	0	0.19	2	Human_GW18
PTMA	0.24	0.2	0.25	0.2	2	Human_GW18
EFHD1	0	0	0.94	0	2	Human_GW18
ARL4C	0	0.24	0	0.1	2	Human_GW18
SH3BP4	0	0.7	0	0	2	Human_GW18
ACKR3	0	0.22	0.25	0.13	2	Human_GW18
LRRFIP1	0	0.31	0	0	2	Human_GW18
HES6	0	0.08	0	0.13	2	Human_GW18
COX5B	0.34	0	0	0	2	Human_GW18
AFF3	0	0.37	0	0	2	Human_GW18
RPL31	0.68	0	0.09	0	2	Human_GW18
MAP4K4	0	0.24	0	0	2	Human_GW18
POU3F3	0	0.22	0	0.01	2	Human_GW18
NCK2	0	0.42	0	0.12	2	Human_GW18
KCMF1	0	0.29	0.04	0	2	Human_GW18
TMSB10	0.18	0.22	0.01	0.2	2	Human_GW18
TIA1	0	0.15	0	0	2	Human_GW18
PCBP1	0	0.17	0	0.11	2	Human_GW18
AAK1	0	0.01	0.42	0	2	Human_GW18
GFPT1	0	0.35	0	0	2	Human_GW18
CNRIP1	0.2	0	0.52	0	2	Human_GW18
RAB1A	0.48	0	0.03	0	2	Human_GW18
MDH1	0	0	0.15	0.08	2	Human_GW18
COX7C	0.13	0	0	0	2	Human_GW18
CCT4	0	0	0.21	0	2	Human_GW18
BCL11A	0	0.03	0	0	2	Human_GW18
NRXN1	0	0	0.01	0	2	Human_GW18
FBXO11	0	0.13	0	0.07	2	Human_GW18
CALM2	0.15	0	0.02	0	2	Human_GW18
THUMPD2	0	0.26	0.32	0	2	Human_GW18
MAP4K3	0	0.46	0	0.09	2	Human_GW18
SRSF7	0	0	0	0.02	2	Human_GW18
CDC42EP3	0	0.03	0.41	0	2	Human_GW18
CEBPZ	0	0.04	0.19	0	2	Human_GW18
PPP1CB	0	0.2	0	0.07	2	Human_GW18
NCOA1	0	0.05	0.34	0	2	Human_GW18
RHOB	0	0.02	0	0.08	2	Human_GW18
ROCK2	0	0.29	0	0.03	2	Human_GW18
ODC1	0	0.34	0	0.18	2	Human_GW18
YWHAQ	0	0.01	0.02	0	2	Human_GW18
ASAP2	0	0.43	0	0.05	2	Human_GW18
SOX11	0	0	0	0	2	Human_GW18
B4GALNT4	0	0.31	0	0.14	2	Human_GW18
HRAS	0	0.4	0	0.15	2	Human_GW18
LRRC56	0.17	0	0.81	0	2	Human_GW18
RPLP2	0.4	0	0.13	0	2	Human_GW18
AP2A2	0.1	0.06	0.2	0	2	Human_GW18
CD81	0	0.37	0	0.1	2	Human_GW18
CDKN1C	0	0.65	0	0.09	2	Human_GW18
CTTN	0	0.22	0	0	2	Human_GW18
ANKRD13D	0	0.32	0	0.09	2	Human_GW18
KDM2A	0	0.42	0	0.12	2	Human_GW18
CNIH2	0	0.19	0	0.2	2	Human_GW18
FAU	0.1	0.03	0.12	0.05	2	Human_GW18
PPP1R14B	0	0.43	0	0.22	2	Human_GW18
VEGFB	0	0.4	0	0.22	2	Human_GW18
RCOR2	0	0.42	0	0.26	2	Human_GW18
RTN3	0	0	0.15	0	2	Human_GW18
SLC3A2	0	0.26	0	0	2	Human_GW18
FTH1	0.24	0	0.23	0	2	Human_GW18
TMEM132A	0	0.05	0	0.13	2	Human_GW18
MED19	0	0.1	0.28	0	2	Human_GW18
ARFGAP2	0	0.11	0	0	2	Human_GW18
TRIM44	0	0.07	0.25	0	2	Human_GW18
FJX1	0	0.25	0.02	0.14	2	Human_GW18
MPPED2	0	0.04	0	0	2	Human_GW18
RPS13	0.16	0.15	0.1	0.12	2	Human_GW18
RPL27A	0.64	0	0.05	0	2	Human_GW18
TAF10	0	0.45	0	0.12	2	Human_GW18
RNF169	0	0.69	0	0.01	2	Human_GW18
RPS3	0.09	0.05	0.02	0.11	2	Human_GW18
CREBZF	0	0.33	0.01	0	2	Human_GW18
MAML2	0	0.39	0.09	0	2	Human_GW18
TMEM123	0	0.21	0	0	2	Human_GW18
ELMOD1	0.73	0	0	0	2	Human_GW18
SLN	0.83	0	0	0	2	Human_GW18
RDX	0	0.06	0	0	2	Human_GW18
CRYAB	0	0.26	0.51	0	2	Human_GW18
PAFAH1B2	0	0.03	0.43	0	2	Human_GW18
SCN2B	0.4	0	0.61	0	2	Human_GW18
KMT2A	0	0.14	0	0	2	Human_GW18
DDX6	0	0.04	0	0	2	Human_GW18
RPS25	0.19	0	0.15	0	2	Human_GW18
HSPA8	0	0	0.1	0	2	Human_GW18
FEZ1	0	0	0	0	2	Human_GW18
ETS1	0	0.43	0.3	0	2	Human_GW18
NELFB	0	0.42	0	0.16	2	Human_GW18
TMEM203	0	0.2	0	0.14	2	Human_GW18
UBAC1	0	0.22	0.07	0.11	2	Human_GW18
BRD3	0	0.1	0	0	2	Human_GW18
RPL7A	0	0.11	0.14	0.13	2	Human_GW18
RALGDS	0	0.28	0	0.13	2	Human_GW18
ABL1	0	0.63	0	0	2	Human_GW18
NCS1	0	0.29	0	0.23	2	Human_GW18
FNBP1	0	0.09	0.02	0	2	Human_GW18
SET	0	0.03	0	0	2	Human_GW18
RPL12	0.15	0	0.15	0	2	Human_GW18
HSPA5	0	0.03	0	0.02	2	Human_GW18
RPL35	0.33	0	0	0	2	Human_GW18
LHX6	0	0.13	0	0	2	Human_GW18
RAB14	0	0.22	0	0	2	Human_GW18
KIAA1958	0	0.57	0	0.02	2	Human_GW18
PTBP3	0	0.35	0	0	2	Human_GW18
ZNF462	0	0.23	0	0	2	Human_GW18
MSANTD3	0	0.57	0	0	2	Human_GW18
CLTA	0	0	0.29	0	2	Human_GW18
CNTFR	0	0.27	0	0.02	2	Human_GW18
ENHO	0	0.21	0.06	0.03	2	Human_GW18
UBE2R2	0	0.25	0	0.12	2	Human_GW18
DNAJA1	0	0	0	0	2	Human_GW18
MOB3B	0	0.37	0	0	2	Human_GW18
TUSC1	0	0.2	0	0.4	2	Human_GW18
PSIP1	0	0.1	0	0	2	Human_GW18
UHRF2	0	0.43	0	0.13	2	Human_GW18
GKAP1	0	0.52	0	0.2	2	Human_GW18
HNRNPK	0	0	0	0	2	Human_GW18
AGTPBP1	0	0.26	0.02	0	2	Human_GW18
SECISBP2	0	0.12	0	0	2	Human_GW18
GADD45G	0	0.4	0	0	2	Human_GW18
NFIL3	0	0.35	0	0.03	2	Human_GW18
FGD3	0.06	0.29	0	0	2	Human_GW18
YWHAE	0	0	0.01	0	2	Human_GW18
PRPF8	0	0.18	0	0	2	Human_GW18
PAFAH1B1	0	0.09	0	0	2	Human_GW18
EMC6	0	0.11	0.11	0	2	Human_GW18
PFN1	0	0.07	0.01	0	2	Human_GW18
RPAIN	0	0	0	0	2	Human_GW18
NLRP1	0	0.28	0	0.17	2	Human_GW18
GABARAP	0.21	0.38	0	0	2	Human_GW18
EIF5A	0	0.08	0.09	0	2	Human_GW18
CHD3	0	0.15	0	0	2	Human_GW18
VAMP2	0.02	0	0.21	0	2	Human_GW18
RPL26	0.32	0.02	0.15	0	2	Human_GW18
SHISA6	0	0	0.81	0	2	Human_GW18
CENPV	0	0.17	0	0.04	2	Human_GW18
NCOR1	0	0	0.25	0	2	Human_GW18
RPL23A	0.27	0	0.03	0	2	Human_GW18
MYO18A	0	0.42	0.25	0	2	Human_GW18
SUZ12	0	0.34	0	0.01	2	Human_GW18
ATAD5	0	0.18	0.24	0	2	Human_GW18
TMEM98	0	0.32	0	0	2	Human_GW18
AP2B1	0.09	0.01	0	0	2	Human_GW18
DHX40	0	0.42	0	0	2	Human_GW18
SPAG9	0	0.15	0	0	2	Human_GW18
LUC7L3	0	0	0.14	0	2	Human_GW18
CBX1	0.02	0.01	0.39	0	2	Human_GW18
RPL23	0.1	0	0.18	0	2	Human_GW18
RPL19	0.14	0.12	0.09	0.12	2	Human_GW18
NEUROD2	0.62	0	0.06	0	2	Human_GW18
PPP1R1B	0.76	0	0	0	2	Human_GW18
THRA	0.27	0	0.19	0	2	Human_GW18
KRT10	0.06	0.12	0	0	2	Human_GW18
EIF1	0	0.01	0	0.05	2	Human_GW18
STAT3	0	0.42	0	0	2	Human_GW18
RPL27	0.32	0	0	0	2	Human_GW18
RND2	0	0.56	0	0.22	2	Human_GW18
ARL4D	0	0.07	0	0	2	Human_GW18
FAM171A2	0	0.39	0	0.21	2	Human_GW18
NMT1	0	0.11	0.15	0	2	Human_GW18
MAPT	0	0	0.35	0	2	Human_GW18
KANSL1	0	0.26	0	0	2	Human_GW18
DDX5	0	0	0	0	2	Human_GW18
SMURF2	0	0.34	0	0	2	Human_GW18
CACNG4	0	0.14	0	0.16	2	Human_GW18
PSMD12	0	0.04	0	0	2	Human_GW18
RPL38	0.11	0	0	0	2	Human_GW18
SUMO2	0	0	0.07	0	2	Human_GW18
UBALD2	0	0.39	0	0.17	2	Human_GW18
MXRA7	0	0.26	0.02	0.17	2	Human_GW18
CBX4	0	0.44	0	0.23	2	Human_GW18
ACTG1	0	0.2	0.07	0.23	2	Human_GW18
ALYREF	0	0.38	0	0.21	2	Human_GW18
MAFG	0	0.42	0	0.14	2	Human_GW18
RAC3	0.53	0	0	0	2	Human_GW18
RFNG	0	0.36	0	0.21	2	Human_GW18
DUS1L	0	0.35	0	0.4	2	Human_GW18
MPHOSPH8	0	0.03	0	0	2	Human_GW18
AMER2	0	0.11	0	0.07	2	Human_GW18
RPL21	0.32	0.04	0.1	0.04	2	Human_GW18
POLR1D	0	0.09	0	0.02	2	Human_GW18
DCLK1	0	0.08	0	0	2	Human_GW18
DNAJC15	0	0.1	0	0	2	Human_GW18
TPT1	0	0	0	0.06	2	Human_GW18
ZC3H13	0	0.03	0	0	2	Human_GW18
ITM2B	0	0.01	0.25	0	2	Human_GW18
CLN5	0	0	0.71	0	2	Human_GW18
MYCBP2	0	0.02	0	0	2	Human_GW18
SLAIN1	0	0.43	0	0.09	2	Human_GW18
RBM26	0	0.2	0	0.1	2	Human_GW18
RAP2A	0	0.4	0	0	2	Human_GW18
FARP1	0	0.06	0	0	2	Human_GW18
EFNB2	0	0.14	0	0.16	2	Human_GW18
ARGLU1	0	0.02	0.32	0	2	Human_GW18
CARS2	0	0.48	0	0.1	2	Human_GW18
ING1	0	0.36	0	0.18	2	Human_GW18
SOX1	0	0.68	0	0.09	2	Human_GW18
LAMP1	0	0.14	0.29	0	2	Human_GW18
UPF3A	0	0.1	0	0	2	Human_GW18
RBFA	0	0.22	0.28	0	2	Human_GW18
NEDD4L	0	0.17	0	0.02	2	Human_GW18
TXNL1	0	0	0.01	0	2	Human_GW18
TCF4	0	0	0	0	2	Human_GW18
MBD2	0	0.41	0	0.18	2	Human_GW18
MEX3C	0	0.36	0	0.18	2	Human_GW18
RNF165	0	0.07	0	0.12	2	Human_GW18
SETBP1	0	0.03	0	0	2	Human_GW18
CELF4	0.21	0	0.18	0	2	Human_GW18
ZNF396	0	0	0.87	0	2	Human_GW18
ZNF24	0	0.06	0.18	0	2	Human_GW18
CDH2	0	0.39	0	0	2	Human_GW18
MYL12B	0	0	0	0	2	Human_GW18
ANKRD12	0	0	0.03	0	2	Human_GW18
RALBP1	0	0.36	0	0	2	Human_GW18
PSMG2	0	0.03	0	0.04	2	Human_GW18
LDLRAD4	0	0.39	0	0	2	Human_GW18
TPGS1	0	0.26	0	0.19	2	Human_GW18
PALM	0	0.23	0	0.2	2	Human_GW18
TMEM259	0	0.41	0	0.13	2	Human_GW18
GPX4	0	0.01	0	0	2	Human_GW18
MIDN	0	0.08	0	0.11	2	Human_GW18
NDUFS7	0.33	0	0.02	0	2	Human_GW18
DAZAP1	0	0.41	0	0	2	Human_GW18
RPS15	0.32	0.07	0.24	0.02	2	Human_GW18
MEX3D	0	0.68	0	0	2	Human_GW18
TCF3	0	0.29	0	0.19	2	Human_GW18
LSM7	0	0.01	0.1	0	2	Human_GW18
EEF2	0.35	0	0	0	2	Human_GW18
MAP2K2	0	0.22	0	0.31	2	Human_GW18
MYDGF	0	0.07	0.26	0	2	Human_GW18
PTPRS	0	0.21	0	0	2	Human_GW18
RPL36	0.06	0	0	0	2	Human_GW18
NDUFA11	0.39	0	0	0	2	Human_GW18
ALKBH7	0.01	0.08	0	0	2	Human_GW18
KHSRP	0	0.4	0	0	2	Human_GW18
PRR36	0	0.45	0	0.11	2	Human_GW18
CTXN1	0	0.19	0.1	0	2	Human_GW18
TIMM44	0	0.18	0	0	2	Human_GW18
ELAVL1	0	0.2	0.08	0	2	Human_GW18
HNRNPM	0	0.02	0	0	2	Human_GW18
PIN1	0.05	0.01	0.08	0	2	Human_GW18
CARM1	0	0.31	0.22	0	2	Human_GW18
ELAVL3	0	0.02	0	0	2	Human_GW18
CALR	0	0.01	0	0.05	2	Human_GW18
GADD45GIP1	0.29	0	0.42	0	2	Human_GW18
IER2	0	0.15	0	0	2	Human_GW18
RFX1	0	0.36	0.03	0	2	Human_GW18
PKN1	0	0.13	0	0.34	2	Human_GW18
BRD4	0	0.16	0	0.05	2	Human_GW18
TPM4	0	0.14	0.03	0	2	Human_GW18
ANO8	0	0.71	0	0	2	Human_GW18
RPL18A	0.25	0.1	0	0.16	2	Human_GW18
JUND	0	0.49	0	0.07	2	Human_GW18
SSBP4	0	0.33	0	0.23	2	Human_GW18
UBA52	0.21	0	0	0	2	Human_GW18
HOMER3	0	0.15	0	0.09	2	Human_GW18
NDUFA13	0.52	0	0	0	2	Human_GW18
ZNF43	0	0.14	0.38	0	2	Human_GW18
URI1	0	0.5	0	0.01	2	Human_GW18
UBA2	0	0.04	0.3	0	2	Human_GW18
GRAMD1A	0	0.36	0	0.15	2	Human_GW18
USF2	0	0.22	0	0.04	2	Human_GW18
COX6B1	0.32	0	0	0	2	Human_GW18
KMT2B	0	0.46	0	0.16	2	Human_GW18
TBCB	0.16	0	0	0	2	Human_GW18
DPF1	0	0.04	0	0	2	Human_GW18
PSMD8	0	0.04	0	0	2	Human_GW18
HNRNPL	0	0.37	0	0.09	2	Human_GW18
RPS16	0.21	0	0.01	0	2	Human_GW18
EID2	0	0.41	0	0.17	2	Human_GW18
FBL	0.37	0	0.15	0	2	Human_GW18
RPS19	0.31	0.18	0.14	0.16	2	Human_GW18
GSK3A	0	0.34	0	0.12	2	Human_GW18
ZNF428	0.14	0	0.2	0	2	Human_GW18
RTN2	0	0.32	0	0.23	2	Human_GW18
SNRPD2	0.45	0	0	0	2	Human_GW18
NOVA2	0	0.37	0	0.05	2	Human_GW18
NPAS1	0	0.42	0	0.15	2	Human_GW18
TMEM160	0.56	0	0	0	2	Human_GW18
MEIS3	0	0.43	0	0.12	2	Human_GW18
[truncated: 537,824+ more rows]
