# Supplementary material for: Cortical arealization of interneurons defines shared and distinct molecular programs in developing human and macaque brains
Source: Research Square preprint supplement (doi:10.21203/rs.3.rs-3939272/v1), 2024-02-26
Supplement: Supplementary file 7 [file 87fd3914f3d37516ac54be5a.xlsx]

## Sheet: Supplementary Data 7
Table S7. DEGs between human and macaque in 4 cortical lobes for MAF lineage subtypes and NKX2-1 lineage subtypes.
gene	MAF FC			MAF MSC			MAF TC			MAF OC			NKX2_1 FC			NKX2_1 MSC			NKX2_1 TC			NKX2_1 OC			included
	log2FC	p_val_adj	species	log2FC	p_val_adj	species	log2FC	p_val_adj	species	log2FC	p_val_adj	species	log2FC	p_val_adj	species	log2FC	p_val_adj	species	log2FC	p_val_adj	species	log2FC	p_val_adj	species
AAK1	0.890708	4.89924e-12	Macaque	0.727558	1.15689e-26	Macaque				1.11812	8.61477e-18	Macaque				0.907147	5.2718e-10	Macaque							FALSE
AATF				0.24745	1.75163e-09	Human																			FALSE
ABCD4				0.40017	3.49173e-20	Human	0.420433	2.75921e-06	Human							0.635152	3.09594e-05	Human							FALSE
ABHD2	0.550189	3.45544e-05	Macaque	0.498223	5.0191e-08	Macaque										0.730449	6.01268e-07	Macaque							FALSE
ABI1	0.442053	0.0082693	Macaque	0.368487	0.033639	Macaque																			FALSE
ABI2	0.726808	6.54928e-10	Macaque	0.833003	3.54434e-31	Macaque	0.637188	0.000214945	Macaque	1.06178	1.15013e-14	Macaque	1.3389	0.0437028	Macaque	0.831741	1.38037e-08	Macaque							FALSE
ABL1	1.2009	1.52282e-26	Macaque	0.943002	6.38632e-46	Macaque	0.935187	2.75386e-18	Macaque	1.21235	5.59051e-24	Macaque	1.68105	0.0102134	Macaque	0.861729	8.31808e-09	Macaque							FALSE
ABL2				0.377413	0.00965001	Macaque																			FALSE
ABR	0.629052	7.75102e-05	Macaque	0.513868	8.87092e-10	Macaque				0.88244	1.38052e-10	Macaque													FALSE
ABRACL							0.64732	0.0172796	Macaque																FALSE
ACAA1																0.733936	4.64242e-07	Human							TRUE
ACAA2																0.572918	5.21441e-05	Human							FALSE
ACADM	0.671293	2.01611e-05	Human	0.789341	5.91827e-52	Human	0.631643	4.80812e-17	Human	0.79081	2.79484e-10	Human				0.825407	2.50939e-09	Human							FALSE
ACAP2	0.961824	4.13433e-17	Macaque	0.470882	7.35924e-06	Macaque				0.542409	0.000499987	Macaque													TRUE
ACAP3	0.562148	0.000494524	Macaque	0.311451	0.0191729	Macaque																			FALSE
ACAT2	0.753401	5.79856e-08	Human	0.614035	9.66845e-33	Human	0.502596	4.89493e-13	Human							0.633813	0.000174924	Human							FALSE
ACBD3	1.12548	1.52367e-22	Macaque	0.709012	1.55613e-16	Macaque				0.810901	3.2005e-10	Macaque				1.15238	1.08826e-13	Macaque							FALSE
ACIN1	0.872646	4.93842e-16	Macaque	0.543136	1.8075e-10	Macaque				1.0843	8.83026e-17	Macaque													FALSE
ACKR3	0.718918	4.26588e-12	Macaque				0.578841	0.00377415	Human																FALSE
ACO2				0.456352	3.89749e-25	Human				0.364398	0.000292578	Human				0.693199	3.23758e-06	Human							FALSE
ACOT13																0.558682	0.000820058	Macaque							FALSE
ACOT7				0.400164	0.00828517	Macaque																			FALSE
ACP1				0.676108	5.49714e-45	Human	0.465799	2.19146e-12	Human	0.598212	1.41749e-07	Human				0.611605	0.00216006	Human	1.13321	0.00339999	Human				FALSE
ACSL3							0.282675	0.0174843	Human																FALSE
ACTB	5.45085	1.59768e-182	Human	5.18488	0	Human	4.79085	0	Human	4.63406	5.37478e-182	Human	6.28376	9.78836e-21	Human	5.60299	1.51776e-159	Human	5.10902	1.99633e-28	Human	4.33853	4.74086e-11	Human	FALSE
ACTG1	0.722105	1.91724e-34	Macaque				0.37143	2.15999e-21	Macaque																TRUE
ACTL6A				0.364973	1.23841e-12	Human										0.812296	1.35932e-08	Human							FALSE
ACTL6B							0.625806	0.00115989	Macaque																FALSE
ACTN4	0.403122	0.022712	Macaque																						FALSE
ACTR1A				0.25524	1.3885e-09	Human	0.265601	0.00108198	Human																FALSE
ACTR2	0.71743	7.32613e-09	Macaque							0.769763	2.3977e-06	Macaque													FALSE
ACVR1B	0.561865	0.000465742	Macaque	0.553675	4.07305e-13	Macaque				0.700809	8.94927e-06	Macaque													FALSE
ACVR1C	0.80987	2.64798e-08	Macaque	1.05448	2.32391e-49	Macaque										1.2041	7.83609e-14	Macaque							FALSE
ACVR2A	0.534614	2.20501e-05	Macaque	0.568842	7.4147e-11	Macaque																			FALSE
ACVR2B	0.898134	7.57761e-13	Macaque	0.673249	2.61334e-16	Macaque				0.722261	9.14358e-08	Macaque				0.864047	1.99079e-08	Macaque							FALSE
ACYP1	0.367312	0.0431625	Macaque	0.537084	4.4453e-06	Macaque	0.778354	2.68834e-10	Macaque																FALSE
ADAM10	0.404987	0.0248908	Macaque							0.536771	0.0436432	Macaque													FALSE
ADAR	0.678847	2.69835e-07	Macaque	0.602902	5.82041e-13	Macaque				0.720741	1.80364e-07	Macaque				0.645155	0.0178314	Macaque							FALSE
ADD1	0.947266	2.77386e-15	Macaque	0.676922	7.77292e-20	Macaque				0.774924	9.98753e-10	Macaque													FALSE
ADD2	0.965049	2.89849e-15	Macaque	0.908474	4.28262e-36	Macaque				0.945408	7.79368e-14	Macaque				0.965042	2.65041e-09	Macaque							FALSE
ADH5				0.601855	9.28733e-32	Human										0.739783	6.02811e-07	Human							FALSE
ADNP	1.22419	2.91352e-26	Macaque	0.802467	4.6414e-23	Macaque				1.07409	1.115e-15	Macaque				1.1188	6.01528e-14	Macaque							FALSE
ADNP2	0.659002	5.66247e-06	Macaque	0.724261	1.47405e-26	Macaque				0.554363	2.19549e-05	Macaque				0.721793	1.49755e-06	Macaque							FALSE
AEBP2	0.728036	7.97525e-11	Macaque	0.785078	5.26773e-27	Macaque				0.925342	1.04433e-13	Macaque				0.865019	8.49708e-08	Macaque							FALSE
AFAP1	0.612245	6.51269e-05	Macaque	0.463286	6.95515e-05	Macaque				0.600044	0.0156346	Macaque													FALSE
AFF2	0.775551	3.59912e-10	Macaque	0.617015	1.63511e-09	Macaque				0.811884	5.51161e-09	Macaque													FALSE
AFF3	0.803855	6.08079e-08	Macaque	0.649761	3.29417e-12	Macaque				0.577755	0.000180158	Macaque													FALSE
AFF4	1.07323	1.72306e-20	Macaque	0.676183	4.69014e-15	Macaque				0.91363	1.42373e-11	Macaque													FALSE
AGAP3										0.413904	0.00168665	Macaque													FALSE
AGFG1	1.05986	1.51607e-18	Macaque	0.761814	1.21079e-25	Macaque				0.756719	1.39793e-09	Macaque				0.866504	9.30769e-09	Macaque							FALSE
AGGF1				0.335907	2.58036e-17	Human																			FALSE
AGK	0.596586	0.000205463	Macaque							0.464696	0.00587326	Macaque													FALSE
AGO1	0.848396	7.36624e-13	Macaque	1.02839	1.71702e-41	Macaque	0.504439	0.00880114	Macaque	0.946906	1.27646e-15	Macaque				1.01152	1.87797e-09	Macaque							FALSE
AGO3	0.732252	8.5697e-09	Macaque																						FALSE
AGO4	0.864336	9.22627e-14	Macaque	0.798985	2.62137e-27	Macaque	0.554886	0.00299683	Macaque	0.88574	3.86428e-13	Macaque				1.01162	2.48083e-12	Macaque							TRUE
AGPAT3	0.771203	6.49478e-12	Macaque	0.652521	1.13941e-22	Macaque				0.893932	7.86379e-13	Macaque				0.741439	3.3049e-07	Macaque							FALSE
AGPAT4	0.626165	3.08526e-06	Macaque	0.531382	2.84281e-07	Macaque				0.705815	0.000270751	Macaque				0.691087	8.513e-06	Macaque							FALSE
AGPAT5	0.573878	1.89379e-07	Macaque							0.540122	5.15806e-06	Macaque													FALSE
AHCTF1	0.627707	3.00677e-07	Macaque																						FALSE
AHCYL1	0.457605	0.0403815	Macaque	0.315173	0.00162792	Macaque				0.537767	0.00131244	Macaque													FALSE
AIMP1	0.632624	1.74283e-07	Macaque	0.743601	1.72667e-21	Macaque	0.856444	6.01705e-13	Macaque							0.759235	7.52759e-06	Macaque							FALSE
AK1	1.1532	7.02842e-20	Human	0.918324	2.62804e-73	Human	0.730604	2.05462e-27	Human	0.867911	3.56744e-14	Human				1.00869	4.06176e-13	Human							FALSE
AKAP11	1.08662	7.6638e-19	Macaque	0.915024	4.97992e-37	Macaque	0.632659	0.00809121	Macaque	1.21076	2.8698e-20	Macaque				0.89009	2.37718e-08	Macaque							FALSE
AKAP17A	0.65293	4.90551e-08	Macaque																						FALSE
AKAP5				0.490896	4.20627e-16	Human	0.74422	1.11458e-14	Human																FALSE
AKAP6	0.8178	2.30969e-10	Macaque	0.673035	5.05537e-15	Macaque				0.613675	1.57154e-05	Macaque				0.750817	9.9225e-06	Macaque							FALSE
AKAP7	1.0001	1.15436e-11	Human	0.653399	1.33772e-35	Human	0.750868	9.43789e-26	Human	0.592621	0.00010229	Human													FALSE
AKAP8				0.46468	1.09148e-09	Macaque				0.566631	0.000337741	Macaque													TRUE
AKAP8L	0.432589	0.00951888	Macaque																						FALSE
AKAP9	1.0969	1.65624e-31	Macaque	0.877219	8.05905e-77	Macaque				1.10699	9.90298e-31	Macaque	1.76761	1.43568e-07	Macaque	1.08183	1.28633e-26	Macaque							FALSE
AKNA	0.555253	6.81932e-06	Macaque	0.411461	5.61231e-06	Macaque																			FALSE
AKR1A1							0.621687	2.11794e-05	Macaque																FALSE
AKR1B1				0.628335	1.8431e-29	Human	0.28275	2.72032e-07	Human	0.820698	1.28529e-08	Human				1.06303	4.67689e-13	Human							TRUE
AKR1C1	0.918603	4.26588e-12	Human	0.879335	3.18477e-68	Human	0.757925	3.3515e-29	Human	0.812081	4.25828e-14	Human				1.02047	4.40676e-16	Human							FALSE
AKR7A2	0.486186	0.00145873	Macaque	0.607777	1.93521e-14	Macaque	0.55645	0.000941959	Macaque	0.71963	5.70105e-06	Macaque				0.583138	0.0473062	Macaque							FALSE
AKT1	0.545108	0.000585743	Macaque							0.413164	0.0114939	Macaque													FALSE
AKT2	0.59561	4.30699e-05	Macaque	0.467361	9.2951e-11	Macaque										0.636153	0.00457177	Macaque							FALSE
AKT3	0.726709	5.43878e-08	Macaque	0.662716	4.16634e-16	Macaque				0.528333	0.0111793	Macaque				0.946104	4.1946e-07	Macaque							FALSE
ALDH1L2	0.588236	6.9981e-08	Macaque	0.631471	7.17839e-20	Macaque				0.64269	2.28332e-06	Macaque				0.707443	0.000525324	Macaque							FALSE
ALDH2	0.766953	1.23723e-10	Macaque	0.634865	3.01645e-14	Macaque	0.8761	2.65456e-14	Macaque																TRUE
ALDH3A2																0.514037	0.0153141	Human							TRUE
ALDH7A1	0.937389	9.25363e-14	Macaque	0.52773	1.11717e-07	Macaque	0.70548	6.04776e-07	Macaque	0.644997	0.0342095	Macaque													FALSE
ALDH9A1				0.371155	4.07272e-14	Human										0.477214	0.0267894	Human							TRUE
ALDOA	1.7686	2.90858e-41	Human	1.43587	9.79043e-136	Human	1.33274	1.97186e-65	Human	1.20654	3.22199e-26	Human	1.99326	0.00438851	Human	1.58464	6.54544e-33	Human	1.39962	0.00115758	Human				FALSE
ALG5							0.318274	0.000377363	Human																FALSE
ALG8	0.413391	0.00159182	Macaque							0.544778	8.969e-05	Macaque													FALSE
ALKBH7				0.406636	1.94229e-17	Human				0.585336	4.80445e-05	Human													FALSE
AMER2	2.23928	1.22165e-70	Macaque	1.66105	5.20926e-153	Macaque	0.850676	1.96249e-10	Macaque	2.16696	1.56498e-53	Macaque	2.07044	3.51193e-06	Macaque	2.114	1.61237e-53	Macaque				2.47381	0.000133177	Macaque	TRUE
AMN1										0.304743	0.0372658	Human													TRUE
AMOTL1										0.31845	0.0172896	Macaque													FALSE
AMZ2				0.378248	7.23476e-18	Human	0.356086	6.20361e-07	Human	0.465543	0.000962171	Human													FALSE
ANAPC11	0.569507	0.0418449	Human							0.439258	0.00118272	Human													FALSE
ANAPC15	0.442378	0.0159116	Human	0.475633	2.78498e-27	Human										0.66092	8.0454e-05	Human							TRUE
ANGEL2	0.598115	5.9739e-06	Macaque	0.46982	1.50311e-11	Macaque				0.56344	1.57331e-05	Macaque													TRUE
ANGPT2																1.38702	1.57315e-22	Human							FALSE
ANK2	0.793296	4.98844e-10	Macaque	0.686124	5.19235e-15	Macaque				0.62856	0.000111961	Macaque				1.05035	2.16242e-11	Macaque							FALSE
ANK3	1.1774	7.36341e-16	Macaque	0.605873	3.39363e-11	Macaque				1.25379	2.31558e-16	Macaque													FALSE
ANKFY1										0.49506	0.00171942	Macaque													TRUE
ANKH	0.808318	4.50379e-14	Macaque	0.781641	8.82494e-33	Macaque				0.746801	5.35028e-09	Macaque				0.837534	2.94232e-08	Macaque							FALSE
ANKIB1	0.555557	3.53814e-05	Macaque							0.547084	0.00410796	Macaque													FALSE
ANKLE2	0.684303	4.5608e-07	Macaque	0.629126	7.16137e-22	Macaque				0.705575	7.63054e-08	Macaque													FALSE
ANKMY2	0.645617	5.55906e-07	Macaque	0.455817	3.37096e-05	Macaque	0.614183	7.45416e-05	Macaque																FALSE
ANKRD11	1.69984	4.57797e-41	Macaque	0.786426	2.59464e-21	Macaque				0.927439	1.33375e-10	Macaque	2.54389	2.86731e-08	Macaque	1.18528	2.29939e-14	Macaque							FALSE
ANKRD12	1.11884	3.41139e-33	Macaque	0.679454	3.85212e-44	Macaque				0.978773	7.05824e-25	Macaque				0.964054	1.1793e-14	Macaque				1.32932	0.0113215	Macaque	FALSE
ANKRD13B	0.756189	1.05269e-09	Macaque	0.748438	2.6128e-21	Macaque				1.09317	1.7481e-15	Macaque				0.878175	5.55442e-10	Macaque							FALSE
ANKRD13D				0.356712	3.90376e-11	Human	0.444266	3.03095e-07	Human							0.547958	0.028424	Human							FALSE
ANKRD17	0.931064	1.52114e-14	Macaque	0.795239	1.97175e-23	Macaque				0.899582	2.48351e-12	Macaque				0.899799	5.39826e-10	Macaque							FALSE
ANKRD26	0.872194	8.41308e-13	Macaque	0.547709	5.02275e-11	Macaque				0.87406	5.65499e-10	Macaque													FALSE
ANKRD28	1.2132	1.08648e-23	Macaque	1.07057	5.91053e-54	Macaque	1.01605	1.10211e-17	Macaque	0.918384	9.25532e-11	Macaque				1.2601	1.32205e-19	Macaque							FALSE
ANKRD50	0.8156	2.20795e-11	Macaque	0.525253	9.1531e-09	Macaque										0.711176	0.000151854	Macaque							FALSE
ANKRD52	0.559429	8.48295e-06	Macaque							0.685485	1.26939e-10	Macaque				0.725241	1.12093e-07	Macaque							FALSE
ANKS1A										0.570585	5.07753e-06	Macaque													FALSE
ANKS1B	0.639545	1.77295e-06	Macaque	0.443007	0.00044078	Macaque				0.536968	0.00237936	Macaque				0.654341	0.041306	Macaque							FALSE
ANKS3	0.494759	9.88932e-05	Macaque	0.485519	6.14286e-08	Macaque				0.670217	8.30069e-05	Macaque													TRUE
ANKZF1	0.586676	6.42784e-05	Macaque	0.341029	0.0445148	Macaque																			TRUE
ANP32A	0.507564	0.000338175	Macaque	0.440341	5.02814e-05	Macaque				0.504028	0.0474739	Macaque													FALSE
ANP32B				0.347931	5.23918e-11	Human																			TRUE
ANTXR1				0.546171	2.39496e-16	Macaque										0.902394	1.1102e-08	Macaque							FALSE
AP1G1	0.542805	6.06856e-05	Macaque							0.595297	0.000256824	Macaque													FALSE
AP1S1										0.397602	0.049847	Human													FALSE
AP1S2																1.12032	1.04488e-12	Macaque							FALSE
AP2B1																0.579504	0.00379839	Macaque							FALSE
AP2M1																0.812108	2.83594e-12	Human							FALSE
AP3D1	0.685035	5.29211e-09	Macaque	0.35007	0.0339079	Macaque																			FALSE
AP3S1	1.35556	1.34185e-23	Human	1.25498	3.24504e-105	Human	1.06811	9.37887e-40	Human	1.47142	9.96338e-37	Human	1.89432	0.00184433	Human	1.22552	2.68662e-20	Human	1.50618	0.000820522	Human				FALSE
APAF1	0.922366	3.62632e-16	Macaque	0.603809	2.14591e-18	Macaque				0.609025	4.50034e-07	Macaque													FALSE
APBA2	0.662318	1.23715e-07	Macaque																						FALSE
APBB2	0.450143	0.00526998	Macaque	0.555591	2.35795e-11	Macaque				0.679282	3.273e-07	Macaque													FALSE
APC	1.53646	3.9125e-45	Macaque	1.03474	6.18442e-66	Macaque				1.31902	6.42122e-29	Macaque	1.81253	1.21256e-05	Macaque	1.2832	3.10484e-23	Macaque							FALSE
APC2				0.316174	5.42036e-16	Human	0.514468	6.97343e-14	Human																FALSE
APLP2				0.412341	0.00041826	Macaque																			FALSE
APOOL	0.885016	1.00897e-14	Macaque	0.896484	3.64146e-43	Macaque				0.748505	8.5342e-09	Macaque				0.855775	1.80675e-09	Macaque							FALSE
APP	0.634967	0.000326077	Macaque	0.769287	3.73419e-21	Macaque	0.646782	8.35253e-12	Macaque	1.0155	1.69638e-15	Macaque							1.12766	0.0390259	Macaque				FALSE
APPL1	0.857362	3.87064e-12	Macaque	0.671739	4.89847e-10	Macaque				0.566039	0.00567625	Macaque				0.753044	0.000625404	Macaque							FALSE
APTX	0.470717	0.0112341	Macaque	0.359192	0.000207817	Macaque																			FALSE
ARCN1	0.434343	0.00102849	Macaque																						FALSE
ARF1	0.382725	0.0130311	Macaque																						FALSE
ARF3	0.449788	0.0244359	Macaque	0.401043	0.0296394	Macaque																			FALSE
ARF5				0.6321	8.59258e-14	Macaque	1.07844	3.62775e-27	Macaque	0.696791	0.000295265	Macaque													FALSE
ARF6	0.664285	4.82581e-05	Macaque																						FALSE
ARFGAP3	0.371135	0.00968343	Macaque																						FALSE
ARFGEF1	0.780963	2.34172e-11	Macaque																						FALSE
ARFGEF2	0.604075	5.90376e-07	Macaque																						FALSE
ARGLU1	0.901578	1.16413e-16	Macaque	0.944141	3.05239e-73	Macaque	0.852911	9.21322e-20	Macaque	0.698224	3.41983e-10	Macaque				1.1594	9.11455e-27	Macaque							TRUE
ARHGAP1																0.530639	0.00192518	Macaque							FALSE
ARHGAP12	0.746636	4.54039e-11	Macaque																						FALSE
ARHGAP17	0.558045	8.53486e-06	Macaque																						FALSE
ARHGAP21	1.16511	2.60157e-20	Macaque	0.410158	0.000802371	Macaque	0.298098	0.017173	Human	0.873809	3.97576e-10	Macaque	1.61925	0.00322298	Macaque	1.05384	4.49812e-11	Macaque							FALSE
ARHGAP32	1.01691	7.88143e-18	Macaque	0.809367	4.54729e-28	Macaque				1.00222	1.59166e-16	Macaque				0.979483	5.46808e-12	Macaque							FALSE
ARHGAP33				0.63935	3.18393e-11	Macaque				0.525212	0.00305156	Macaque				0.861831	1.20116e-07	Macaque							FALSE
ARHGAP35	1.14049	9.53258e-23	Macaque	0.85562	5.29544e-32	Macaque				1.19178	1.06532e-19	Macaque				0.964927	7.87089e-10	Macaque							FALSE
ARHGAP5				0.350253	0.00233659	Macaque																			FALSE
ARHGDIA	0.647122	1.31046e-05	Human	0.703112	2.59338e-42	Human	0.290783	6.48559e-06	Human	0.423099	3.66763e-05	Human				0.83207	1.39366e-09	Human							FALSE
ARHGEF11	0.604392	6.38234e-08	Macaque							0.670025	2.42215e-08	Macaque													FALSE
ARHGEF12	0.585373	6.03778e-05	Macaque																						FALSE
ARHGEF2							0.507396	0.0165314	Macaque																FALSE
ARHGEF7	0.656239	2.35829e-06	Macaque	0.694731	5.94851e-19	Macaque				0.664224	0.00153962	Macaque													FALSE
ARHGEF9							0.406112	4.16424e-07	Human																FALSE
ARID1A	1.55037	1.19853e-40	Macaque	1.28229	5.67057e-78	Macaque	0.540303	0.0152427	Macaque	1.38607	4.35503e-31	Macaque	1.51143	0.00570796	Macaque	1.51587	4.94439e-29	Macaque							FALSE
ARID1B	1.89558	9.60185e-55	Macaque	1.71636	8.27203e-140	Macaque	1.30535	4.15729e-34	Macaque	1.9598	1.77055e-45	Macaque	1.80311	0.000475908	Macaque	2.25387	4.00309e-56	Macaque	2.03256	6.19612e-06	Macaque				FALSE
ARID2	0.785911	1.08631e-11	Macaque	0.743242	7.66347e-23	Macaque				0.658566	5.31924e-05	Macaque				0.784606	0.000104697	Macaque							FALSE
ARID4B	0.905418	5.20386e-17	Macaque	0.568338	1.67591e-10	Macaque				0.833398	9.33182e-09	Macaque	1.33636	0.00263513	Macaque										FALSE
ARIH1	0.649608	6.19745e-08	Macaque	0.50579	1.97506e-10	Macaque				0.636089	0.000117397	Macaque				0.747954	7.12e-05	Macaque							FALSE
ARL1	0.471185	0.0154605	Macaque							0.41745	0.049303	Macaque													FALSE
ARL10	0.537519	0.0019661	Macaque	0.533835	3.72365e-08	Macaque				0.756752	1.09315e-07	Macaque													FALSE
ARL15	0.442064	0.000772985	Macaque							0.621105	2.429e-05	Macaque													FALSE
ARL16	0.984049	1.3133e-12	Human	0.867343	1.82082e-62	Human	1.05012	1.4865e-42	Human	1.05689	7.91546e-18	Human				0.73019	3.51127e-08	Human	1.2024	0.0087439	Human				FALSE
ARL2BP	0.945138	2.83757e-12	Human	0.943592	1.6754e-77	Human	0.480937	5.76341e-11	Human	0.263279	0.0465014	Human				1.39007	4.80706e-24	Human							FALSE
ARL3				0.474608	1.5602e-07	Macaque																			FALSE
ARL4A																0.688668	0.0176666	Macaque							FALSE
ARL4C	1.83614	2.70273e-48	Macaque	0.32799	2.5547e-08	Macaque	0.601692	2.34028e-19	Human	1.62774	1.81392e-37	Macaque	2.38904	6.23928e-10	Macaque	1.66617	1.30685e-35	Macaque							FALSE
ARL4D	1.10197	2.93001e-13	Human	1.07069	1.47735e-94	Human	0.677261	8.49808e-26	Human	1.06805	1.86114e-19	Human	1.45841	0.0435101	Human	1.13192	2.69499e-24	Human							FALSE
ARL5A				0.320732	1.82539e-10	Human	0.27677	0.00150874	Human																FALSE
ARL6IP4				0.572837	1.77661e-31	Human				0.400712	0.044458	Human				0.775505	1.05863e-05	Human							FALSE
ARL6IP5	0.490875	0.0423035	Macaque							0.604728	0.0107274	Macaque													FALSE
ARL6IP6	0.776672	1.49905e-05	Human	0.843608	2.25979e-57	Human				0.620097	1.61955e-06	Human				1.32208	1.87129e-22	Human							FALSE
ARL8A	0.61279	1.11723e-06	Macaque	0.578963	2.69565e-14	Macaque				0.682868	4.15873e-06	Macaque				0.979663	1.15438e-09	Macaque							FALSE
ARL9	1.08133	2.70852e-18	Macaque	1.1386	5.42402e-54	Macaque	0.998386	1.32051e-20	Macaque	1.21233	2.81479e-19	Macaque				1.01383	4.17228e-11	Macaque							FALSE
ARMC1				0.420184	5.05784e-14	Human	0.242359	0.0265701	Human																FALSE
ARMCX1				0.328864	8.27821e-11	Human																			FALSE
ARMCX3	0.49821	0.00548132	Macaque				0.629666	0.00559081	Macaque	0.784277	0.000209152	Macaque													TRUE
ARMCX6				0.601032	3.19707e-39	Human										0.687517	5.37447e-07	Human							FALSE
ARNT2				0.520967	5.28904e-07	Macaque				0.75633	1.42124e-06	Macaque				0.693738	0.0007638	Macaque							TRUE
ARPC2							0.459276	0.00116676	Macaque																FALSE
ARPC4	0.487871	0.0135018	Macaque													0.678609	0.00345153	Macaque							TRUE
ARPC5				0.441293	1.77455e-16	Human	0.283456	4.33474e-07	Human	0.798347	1.21725e-12	Human				0.470805	0.0486298	Human							FALSE
ARPP19										0.639499	4.38697e-06	Human													FALSE
ARPP21										0.7012	8.30525e-09	Human													TRUE
ARRDC3							0.948807	4.13072e-15	Macaque																FALSE
ARX	1.52578	7.70251e-47	Macaque	0.42133	6.03482e-19	Macaque	0.367318	0.000669786	Human	1.52765	1.32144e-38	Macaque	1.76613	1.18983e-05	Macaque	0.927076	1.40178e-16	Macaque							FALSE
ASAH1							0.428121	1.29725e-10	Human																TRUE
ASAP1	0.631401	1.49396e-08	Macaque																						FALSE
ASCL1	0.641943	0.00198813	Macaque																						FALSE
ASF1A				0.263287	9.31138e-12	Human										0.566886	0.00143422	Human							FALSE
ASH1L	0.707401	6.20015e-10	Macaque	0.652778	5.86522e-16	Macaque				0.822163	9.79022e-09	Macaque													FALSE
ASH2L	0.53262	0.000377631	Macaque	0.480164	0.000125004	Macaque																			TRUE
ASIC1										0.49893	0.000586654	Macaque													FALSE
ASNSD1				0.434886	3.10753e-19	Human	0.22541	0.00469271	Human																FALSE
ASPH				0.355341	0.000137703	Macaque																			FALSE
ASRGL1							0.273229	0.00217622	Human																FALSE
ASTN1	1.00564	3.39596e-14	Macaque	0.925767	4.75846e-40	Macaque	0.629906	0.000105215	Macaque	0.796469	6.8628e-08	Macaque				1.02873	3.68431e-11	Macaque							FALSE
ASXL1	0.793734	7.60652e-12	Macaque																						FALSE
ASXL2										0.549212	0.000115091	Macaque													FALSE
ASXL3	0.981369	1.23048e-14	Macaque	0.83216	7.85824e-30	Macaque				1.09995	2.74616e-15	Macaque				1.19823	3.64507e-15	Macaque							FALSE
ATAD2B	0.844091	5.29111e-11	Macaque	0.504062	6.49185e-07	Macaque				0.609633	7.94399e-05	Macaque													TRUE
ATCAY	0.869855	1.51749e-13	Macaque	0.746991	2.07862e-25	Macaque				1.23682	8.75155e-24	Macaque				0.687923	0.0095715	Macaque							FALSE
ATF4				0.572373	6.72574e-11	Macaque																			FALSE
ATF7IP	1.3453	3.83673e-31	Macaque	1.11625	1.47746e-56	Macaque	0.73563	1.91626e-05	Macaque	1.27423	2.00967e-21	Macaque	1.5663	0.000748499	Macaque	0.738477	0.00029051	Macaque							FALSE
ATG12	0.588186	7.34262e-06	Macaque	1.00069	4.69268e-47	Macaque	1.05886	2.18441e-24	Macaque	1.07447	1.84102e-17	Macaque				0.973676	6.04532e-11	Macaque							TRUE
ATG14										0.489806	0.00292592	Macaque													FALSE
ATN1	1.17737	5.77994e-23	Macaque	1.01479	2.81194e-46	Macaque	0.49915	0.0383737	Macaque	1.04745	3.30961e-17	Macaque				1.35768	3.26535e-20	Macaque							FALSE
ATOX1										0.494566	0.0192691	Human													FALSE
ATP13A2	0.560355	1.59126e-06	Macaque																						FALSE
ATP13A3	0.69028	1.90029e-08	Macaque																						FALSE
ATP1A1				0.425122	1.97179e-05	Macaque				0.826834	6.79048e-08	Macaque													FALSE
ATP1A3	0.501089	0.00321683	Macaque																						FALSE
ATP1B1							0.300204	0.0349725	Human																FALSE
ATP1B2										0.75185	6.7249e-07	Macaque													FALSE
ATP2A2	0.98753	2.87387e-19	Macaque	0.534576	1.35457e-10	Macaque				0.947532	3.7192e-15	Macaque				0.55937	0.0364719	Macaque							FALSE
ATP2B1				0.421937	0.00382151	Macaque										0.857278	3.88444e-06	Macaque							FALSE
ATP6AP1	0.477978	0.003029	Macaque	0.540976	1.56309e-06	Macaque	0.684016	5.3302e-07	Macaque	0.616783	0.00544711	Macaque													FALSE
ATP6V0A1	0.50113	0.0032727	Macaque							0.688944	0.000703566	Macaque													FALSE
ATP6V0B							0.246436	0.00709227	Human																TRUE
ATP6V0C							1.69611	5.19168e-41	Macaque																FALSE
ATP6V0D1				0.452065	0.000852254	Macaque																			FALSE
ATP6V0E1				0.243534	8.59445e-07	Human	0.316817	0.000145357	Human	0.481077	0.00243263	Human													FALSE
ATP6V1D							0.39138	2.39629e-08	Human																FALSE
ATP6V1G1	0.58167	9.3989e-05	Human				0.392151	1.45883e-10	Human	0.536642	4.23821e-07	Human													FALSE
ATP6V1G2	0.694734	2.7198e-07	Human				0.838691	8.52629e-30	Human	0.829565	1.7181e-11	Human													FALSE
ATP8A2	0.431652	0.00098189	Macaque	0.574297	4.26644e-19	Macaque				0.508177	0.00274195	Macaque				0.727505	1.81956e-07	Macaque							TRUE
ATP9A	1.63127	4.48762e-40	Macaque	1.63516	4.63398e-122	Macaque	1.13447	5.53832e-23	Macaque	1.73391	2.8297e-39	Macaque				1.74181	6.18047e-34	Macaque				2.62598	0.000444244	Macaque	FALSE
ATPAF1																0.590902	0.000168003	Human							TRUE
ATRN	0.480477	0.000397445	Macaque							0.456977	0.00280518	Macaque													FALSE
ATRNL1	0.39456	0.00336543	Macaque				0.342439	0.00563915	Human																FALSE
ATRX	0.680881	2.98749e-11	Macaque	0.480912	4.83588e-18	Macaque				0.610359	1.61284e-06	Macaque													FALSE
ATXN1	0.561193	5.39612e-05	Macaque	0.635604	3.59735e-19	Macaque				0.904066	1.60286e-10	Macaque				0.578859	0.0028494	Macaque							FALSE
ATXN10	0.586429	1.53111e-07	Macaque	0.539108	3.80551e-09	Macaque	0.497547	0.000325117	Macaque																FALSE
ATXN2	1.06321	2.80626e-16	Macaque	0.791642	7.64122e-28	Macaque				0.779691	2.23249e-07	Macaque				0.791714	1.38461e-06	Macaque							FALSE
AUTS2	1.50834	4.30195e-32	Macaque	1.27424	4.70306e-72	Macaque				1.42147	1.03775e-27	Macaque				1.30924	1.14371e-19	Macaque							FALSE
AVL9	0.56694	6.1085e-05	Macaque							0.510138	0.000241836	Macaque													FALSE
AZI2				0.312208	1.2443e-13	Human	0.276459	0.000486814	Human																FALSE
AZIN1	0.624958	2.33822e-05	Macaque	0.73661	5.52223e-22	Macaque				0.943273	4.75778e-10	Macaque													FALSE
AZU1	1.15278	5.12825e-23	Macaque	1.2559	8.05256e-81	Macaque	1.24885	3.51761e-37	Macaque	1.29025	1.41228e-24	Macaque				1.09446	1.51751e-15	Macaque							FALSE
B3GALNT1				0.423973	0.00134368	Macaque																			FALSE
B3GALT6	0.574015	8.58737e-06	Macaque													0.533864	0.0451199	Macaque							FALSE
B4GALNT4	0.433953	0.000407606	Macaque							0.428524	0.000145093	Macaque													FALSE
B4GALT3	0.413589	0.00448244	Macaque	0.290591	0.0284998	Macaque																			FALSE
B4GALT5	0.779387	4.82628e-10	Macaque	0.60591	2.09272e-17	Macaque				0.54641	0.00123623	Macaque				0.715547	1.97804e-06	Macaque							FALSE
BAALC				0.517816	2.30524e-24	Human				0.597656	0.0290544	Human													FALSE
BACH2	0.81624	1.65851e-08	Macaque	0.993642	1.77734e-38	Macaque	0.647313	0.000126879	Macaque	1.19308	1.31506e-23	Macaque				1.1889	1.74253e-14	Macaque							FALSE
BAD				0.36335	9.70107e-11	Human																			TRUE
BAG1							0.458882	0.0208014	Macaque																FALSE
BAG5	0.572027	6.97568e-05	Macaque																						FALSE
BANF1				0.735139	1.46042e-30	Macaque	0.912419	8.65235e-26	Macaque	0.566631	0.00609062	Macaque													FALSE
BASP1	1.1526	1.3018e-40	Macaque				0.925868	1.20802e-44	Human	0.650148	1.08135e-12	Human	1.61629	1.62922e-07	Macaque	1.41293	4.41443e-64	Macaque	1.06502	4.98382e-06	Human				FALSE
BAZ1B	1.16039	5.82847e-21	Macaque	0.627908	6.7188e-10	Macaque				0.873686	1.67405e-08	Macaque													FALSE
BAZ2A	0.764923	2.35421e-10	Macaque	0.496398	5.12292e-10	Macaque				0.607382	4.24608e-06	Macaque													FALSE
BCAN																0.890883	6.76664e-09	Human							FALSE
BCAS2							0.312984	0.000163883	Human																FALSE
BCAT1	0.914222	8.85177e-15	Macaque	0.751085	9.7888e-39	Macaque				1.21163	1.88118e-23	Macaque				0.694328	1.01176e-06	Macaque							TRUE
BCL10	0.538097	0.00780581	Macaque	0.497242	3.57934e-07	Macaque				0.65334	0.000627067	Macaque				0.6742	0.018882	Macaque							FALSE
BCL11A	2.22325	1.0186e-83	Macaque	2.18572	0	Macaque	1.93101	2.04659e-71	Macaque	2.45233	1.58819e-83	Macaque	1.5949	4.03253e-05	Macaque	2.24791	2.49349e-68	Macaque	2.07405	5.27526e-10	Macaque	3.09912	9.09687e-07	Macaque	FALSE
BCL11B	2.34697	3.404e-85	Macaque	2.57525	0	Macaque	2.05001	7.51356e-107	Macaque	2.38733	9.97699e-73	Macaque	2.22864	4.32137e-09	Macaque	2.68473	3.11722e-96	Macaque	1.99496	3.40519e-09	Macaque	2.71417	3.29957e-05	Macaque	FALSE
BCL2L1							0.576679	0.0258094	Macaque																FALSE
BCL2L13	0.638741	2.71643e-06	Macaque	0.722169	8.20453e-31	Macaque				0.72499	4.64609e-08	Macaque													FALSE
BCL7C	1.21921	8.79406e-24	Macaque	0.789163	1.2432e-22	Macaque				0.670427	4.38327e-07	Macaque				0.823909	1.81273e-06	Macaque							FALSE
BCL9	0.806221	5.26188e-10	Macaque	0.802965	9.51663e-22	Macaque										0.91542	6.08772e-08	Macaque							FALSE
BCLAF1	0.88351	3.60138e-16	Macaque	0.931436	1.08831e-52	Macaque				0.821169	3.85087e-12	Macaque				0.820059	1.4222e-07	Macaque							FALSE
BCOR	0.514973	0.00061243	Macaque							0.488963	0.0398891	Macaque													FALSE
BCR	0.48195	0.00126594	Macaque	0.652037	8.44611e-22	Macaque				0.589186	4.66969e-08	Macaque				0.907885	3.12337e-09	Macaque							FALSE
BDP1	1.10024	2.02212e-20	Macaque	0.59545	4.52729e-12	Macaque				1.27837	8.14977e-24	Macaque				0.797345	0.000197363	Macaque							FALSE
BEND4	0.804925	1.80409e-12	Macaque	0.39229	0.000589864	Macaque				0.608529	2.13535e-06	Macaque													TRUE
BEND5				0.426269	0.000321308	Macaque										0.741624	1.07969e-05	Macaque							FALSE
BEST1	0.738452	5.80481e-09	Human																						FALSE
BEST3																0.954275	4.63502e-12	Human							FALSE
BEX2	0.614703	3.99482e-08	Macaque	0.84523	6.65443e-45	Macaque	0.506398	0.00883758	Macaque	0.648922	0.00102535	Macaque				1.59643	9.26959e-34	Macaque							FALSE
BEX5	1.28144	1.67582e-20	Human	0.859057	1.33344e-57	Human	0.989259	7.52559e-35	Human	1.03672	4.03755e-16	Human				0.759926	1.65782e-08	Human							TRUE
BFAR				0.440393	1.52308e-20	Human	0.329706	0.000408921	Human	0.535413	0.00272017	Human													FALSE
BICD1							0.538203	7.51411e-11	Human																FALSE
BIN1				0.418303	9.4709e-05	Macaque										0.48664	0.00827744	Macaque							FALSE
BIRC2							0.597273	0.000613316	Macaque																FALSE
BIRC6	1.06619	4.23407e-19	Macaque	0.683214	4.79343e-24	Macaque				0.823567	2.63578e-05	Macaque	1.45206	0.0194526	Macaque										FALSE
BLOC1S2	0.552719	0.0254157	Human																						FALSE
BMI1	0.435709	0.000890364	Macaque																						FALSE
BMPER	0.738623	5.12948e-09	Macaque	0.980776	1.0014e-50	Macaque	0.802493	1.48892e-15	Macaque	0.710326	3.07221e-07	Macaque				0.849008	3.97782e-08	Macaque							FALSE
BMPR2	2.02968	4.54878e-58	Macaque	1.90465	2.00136e-180	Macaque	1.29082	6.89521e-37	Macaque	1.94235	2.01654e-51	Macaque	2.48332	4.72015e-11	Macaque	1.85876	3.64668e-46	Macaque	1.71917	8.77459e-05	Macaque	2.20889	0.00357021	Macaque	FALSE
BMS1				0.446619	4.62303e-16	Human										0.518914	0.000905062	Human							FALSE
BNIP3				0.252046	4.89865e-07	Human																			FALSE
BNIP3L				0.381805	0.0253455	Macaque																			FALSE
BOD1L1	1.84738	1.06989e-50	Macaque	0.757645	1.8573e-21	Macaque	0.260182	0.00092788	Human	1.27056	1.48031e-22	Macaque	1.94498	0.000118211	Macaque	1.60815	9.50963e-30	Macaque							FALSE
BPGM				0.322945	1.00786e-11	Human																			FALSE
BPHL				0.492927	7.23168e-22	Human										0.625957	0.00264633	Human							TRUE
BPTF	1.30235	2.33623e-30	Macaque	0.88799	2.37614e-42	Macaque				1.22966	7.51542e-21	Macaque	1.57638	0.00251964	Macaque	1.04797	8.3429e-14	Macaque							FALSE
BRAF	1.08661	5.689e-16	Macaque	1.0267	1.13415e-52	Macaque	0.608907	4.77026e-08	Macaque	0.894268	4.73607e-12	Macaque				0.963069	2.90309e-12	Macaque							FALSE
BRD1	1.12013	4.18903e-19	Macaque							0.936367	6.20746e-14	Macaque	1.53895	0.0206999	Macaque	1.07027	1.41145e-14	Macaque							FALSE
BRD2	0.9076	2.32384e-13	Macaque	0.681042	6.23213e-17	Macaque				0.959949	1.5219e-12	Macaque													FALSE
BRD3										0.662761	0.0003076	Macaque													FALSE
BRD4	1.52854	3.01728e-35	Macaque	1.36353	5.36953e-88	Macaque	0.779484	1.26651e-07	Macaque	1.47174	9.86444e-30	Macaque				1.95602	1.1627e-43	Macaque				2.13495	0.0014879	Macaque	FALSE
BRD7	0.939046	2.03327e-15	Macaque										1.41868	0.0415608	Macaque	0.688991	0.00568166	Macaque							TRUE
BRD9	0.970988	1.58538e-15	Macaque	1.11296	5.08236e-55	Macaque	0.73303	5.47823e-10	Macaque	1.21118	5.38725e-24	Macaque	1.4928	0.00354962	Macaque	1.12385	1.79205e-14	Macaque							TRUE
BRF1	0.547968	2.18627e-05	Macaque																						FALSE
BRI3	1.07571	2.06234e-22	Macaque													0.618013	0.00595044	Macaque							TRUE
BRINP2	1.09388	2.47434e-17	Macaque	0.809887	5.96073e-25	Macaque	0.779814	1.06404e-11	Macaque	0.683023	1.87707e-05	Macaque													FALSE
BRK1	0.645534	1.06787e-06	Human	0.494932	2.03874e-30	Human				0.534675	4.11693e-08	Human				0.762737	3.2952e-10	Human							FALSE
BRSK1	0.649975	3.69173e-09	Macaque	0.450886	1.32261e-06	Macaque	0.539678	0.00581628	Macaque	0.58728	0.000438466	Macaque													FALSE
BRSK2	0.843277	4.65577e-11	Macaque	0.626453	1.67252e-16	Macaque				0.702775	5.03282e-09	Macaque				0.945646	4.62051e-10	Macaque							FALSE
BRWD1				0.506723	6.28173e-07	Macaque				0.597366	0.00261022	Macaque													TRUE
BRWD3	0.529183	0.000482682	Macaque	0.389276	2.71426e-06	Macaque				0.65236	2.14131e-06	Macaque													FALSE
BSDC1	0.568671	1.22106e-05	Macaque				0.541266	0.0310518	Macaque																FALSE
BSN	0.545919	4.80923e-07	Macaque							0.469194	0.00471264	Macaque													FALSE
BTAF1	0.630335	1.14889e-06	Macaque																						TRUE
BTBD1	0.446443	0.00104565	Macaque																						FALSE
BTBD2	0.72738	7.4487e-08	Macaque	0.497127	6.34561e-11	Macaque				0.599985	1.53982e-06	Macaque													TRUE
BTBD6	0.534198	3.68883e-06	Macaque													0.735077	5.52808e-07	Macaque							FALSE
BTBD7	0.512946	0.000133736	Macaque	0.441431	0.00145622	Macaque																			FALSE
BTD	0.595133	8.36774e-08	Macaque																						FALSE
BTF3	1.91234	6.41382e-85	Human	1.72879	0	Human	1.76446	3.36422e-173	Human	1.479	3.26143e-66	Human	2.14572	1.75749e-10	Human	2.09602	4.26869e-97	Human	1.56532	8.51236e-12	Human	1.42181	0.00590013	Human	TRUE
BTG1	0.555704	0.00363581	Human	0.917328	9.79825e-89	Human				0.46909	0.00899407	Human				0.897474	7.6073e-22	Human	1.38137	5.86151e-11	Human				FALSE
BTG2				0.367808	9.22339e-12	Human										0.784221	2.26161e-05	Human							FALSE
BTG3				0.430232	8.83316e-12	Human										0.676688	0.0004399	Human							FALSE
BUB3				0.225631	4.12784e-05	Human										0.709911	3.58263e-05	Human							FALSE
BUD31	0.611168	0.0101898	Human							0.512588	0.000477861	Human													FALSE
BZW1	0.454114	0.00305361	Macaque	0.716023	8.53974e-21	Macaque	0.671292	8.82555e-08	Macaque	0.601935	0.0144116	Macaque				0.951582	1.2311e-14	Macaque							FALSE
C1D	0.668611	0.00153693	Human	0.350384	3.04868e-12	Human	0.521713	1.46543e-14	Human																FALSE
C1QTNF4							0.289607	0.0405398	Human																TRUE
C2CD5										0.45494	0.000972169	Macaque													FALSE
C9orf72										0.660309	8.9162e-06	Macaque													TRUE
CAB39	0.86325	1.07896e-13	Macaque	0.708278	4.66548e-23	Macaque				0.508325	0.00172521	Macaque				0.84892	4.12927e-07	Macaque							FALSE
CACNA1A	1.28804	1.02191e-24	Macaque	1.05029	7.01935e-52	Macaque	0.66208	3.7205e-10	Macaque	1.08589	1.40526e-17	Macaque				1.0835	7.44353e-15	Macaque							FALSE
CACNA1E	1.08779	2.2476e-17	Macaque	1.03604	3.36128e-52	Macaque	0.815766	4.43458e-10	Macaque	1.50477	8.50822e-28	Macaque	1.70889	0.0102134	Macaque	1.05717	3.33087e-12	Macaque							FALSE
CACNA2D3										0.640369	2.75725e-06	Macaque													FALSE
CACNB4	0.851094	4.51406e-12	Macaque	0.762919	6.55925e-28	Macaque	0.528995	0.000111231	Macaque	0.972814	4.57628e-10	Macaque				0.759754	9.83633e-07	Macaque							FALSE
CACNG2	0.548186	9.06002e-07	Macaque							0.629077	4.00362e-05	Macaque													FALSE
CACNG4	1.40978	4.91612e-31	Macaque	0.99316	6.86581e-41	Macaque				1.0809	1.48466e-17	Macaque	1.63973	0.00392158	Macaque	1.0787	1.3106e-10	Macaque							FALSE
CACNG8	0.731173	1.78305e-06	Macaque							0.562661	0.00133753	Macaque													FALSE
CACYBP				0.721555	1.53084e-22	Macaque	0.744112	2.13068e-08	Macaque							0.658782	0.000169203	Macaque							FALSE
CADM1	1.28713	3.623e-24	Macaque	1.09578	2.76897e-46	Macaque	0.930474	1.18341e-10	Macaque	1.25615	8.80844e-14	Macaque				1.22339	1.59375e-12	Macaque							FALSE
CADM2																0.580093	0.0122726	Macaque							FALSE
CADM4							0.726492	1.30504e-06	Macaque																FALSE
CADPS	1.66933	2.42234e-46	Macaque	1.44194	3.58751e-97	Macaque	0.665621	0.00848629	Macaque	1.68446	3.6574e-36	Macaque				1.21416	3.4895e-13	Macaque							FALSE
CALB2																0.711464	0.000428315	Human							FALSE
CALCOCO1				0.245249	6.84041e-09	Human																			FALSE
CALM1				0.399009	5.26219e-10	Macaque										1.01703	4.02861e-27	Macaque							FALSE
CALM2	1.04449	1.13425e-56	Human	0.298686	4.99006e-14	Human				0.557985	3.29645e-20	Human	1.29	9.66773e-09	Human	0.57793	6.64696e-14	Human							FALSE
CALM3							0.630346	2.41415e-10	Macaque																FALSE
CALR	0.979335	1.10716e-15	Macaque	0.705015	6.55235e-26	Macaque				1.11837	2.38787e-15	Macaque													FALSE
CALU	0.452209	0.0236522	Macaque																						FALSE
CAMK1D				0.497397	2.8493e-05	Macaque										0.885064	4.58652e-08	Macaque							FALSE
CAMK2N1	1.18764	1.58373e-19	Macaque				1.06587	9.28827e-39	Human				2.77114	1.79407e-10	Macaque	1.86193	2.6933e-36	Macaque							FALSE
CAMKK2	0.583804	8.87956e-06	Macaque	0.310309	0.0121589	Macaque				0.630707	4.75805e-06	Macaque													FALSE
CAMLG	0.615867	0.00986301	Human																						FALSE
CAMSAP1	1.22326	1.12342e-23	Macaque	0.884124	2.65214e-31	Macaque				0.885575	1.11197e-09	Macaque	1.56146	0.00120803	Macaque	1.20121	8.70757e-15	Macaque							FALSE
CAMSAP2	0.904085	3.63923e-16	Macaque	0.759599	3.96637e-23	Macaque				0.905108	1.01477e-13	Macaque				0.646688	0.011341	Macaque							FALSE
CAND1	0.503892	0.000733604	Macaque	0.547483	5.03956e-11	Macaque				0.47449	0.0495364	Macaque				0.762002	1.25559e-05	Macaque							FALSE
CANX	0.78705	2.25576e-10	Macaque	0.513224	2.1242e-06	Macaque				0.6421	4.92108e-06	Macaque													FALSE
CAP1				0.802441	2.52676e-59	Human	0.263383	4.91204e-07	Human	0.714937	9.03887e-11	Human				1.1898	4.3724e-20	Human							FALSE
CAPG				0.912469	4.31158e-48	Macaque	1.10295	6.99447e-27	Macaque							0.838081	1.09544e-06	Macaque							FALSE
CAPNS1	0.778215	4.6212e-13	Macaque	0.634582	4.01884e-17	Macaque				0.555311	7.47804e-06	Macaque				0.727011	4.32023e-07	Macaque							FALSE
CAPRIN1	0.521069	1.4767e-05	Macaque	0.557406	1.17244e-07	Macaque				0.685326	0.000145474	Macaque				0.691553	8.05543e-05	Macaque							FALSE
CAPZA1	0.743416	1.61754e-07	Macaque	0.889712	1.39644e-29	Macaque	1.16559	4.0393e-25	Macaque	0.923509	1.52092e-11	Macaque													FALSE
CAPZA2	0.657301	0.00810042	Human																						FALSE
CAPZB																0.573223	0.00331492	Human							FALSE
CARHSP1	0.841811	3.59535e-07	Human	0.593559	7.35885e-35	Human				0.671556	2.60467e-06	Human				1.11871	3.90347e-21	Human							TRUE
CASC3	0.76017	3.54482e-09	Macaque	0.973549	9.34796e-44	Macaque	0.521046	0.00299342	Macaque	1.0197	1.79563e-16	Macaque				0.822368	0.000333532	Macaque							FALSE
CASD1	0.451374	0.000872334	Macaque																						FALSE
CASK	1.4498	2.97419e-33	Macaque	1.26261	1.95284e-70	Macaque	0.73365	7.39824e-08	Macaque	1.51835	9.84864e-32	Macaque	1.94296	0.00118962	Macaque	1.64037	7.00941e-28	Macaque							FALSE
CASP2	0.500189	0.00614947	Macaque	0.821859	4.22342e-27	Macaque				1.03056	5.32495e-14	Macaque				1.00971	2.57895e-11	Macaque							FALSE
CASP3	0.686749	1.10727e-06	Macaque	0.645786	1.00884e-14	Macaque	0.882164	2.78457e-10	Macaque																FALSE
CBFA2T3	0.816704	3.90021e-11	Macaque							0.535115	5.55823e-05	Macaque													FALSE
CBL	0.531533	0.000239497	Macaque	0.617745	1.67283e-14	Macaque				0.59106	1.13181e-05	Macaque													FALSE
CBLB	0.81379	1.92501e-10	Macaque	1.15898	2.72235e-56	Macaque	0.801692	5.09506e-13	Macaque	0.832938	4.93451e-12	Macaque				1.55863	7.51178e-26	Macaque							FALSE
CBX1							0.690459	4.79965e-14	Macaque																FALSE
CBX3																0.693877	7.75513e-05	Macaque							FALSE
CBX4							0.377737	0.000909879	Human																FALSE
CBX5							0.397592	4.44428e-09	Human																FALSE
CBX6	0.609059	1.04937e-05	Macaque	0.403065	0.00511264	Macaque				0.721634	9.45023e-08	Macaque				0.679656	0.00687955	Macaque							FALSE
CC2D2A	0.468347	0.00184842	Macaque																						FALSE
CCAR1	1.01626	1.5465e-16	Macaque	0.594076	3.19816e-16	Macaque				0.65724	0.0121969	Macaque													FALSE
CCDC107				0.320132	4.95608e-11	Human	0.303813	0.00626734	Human																FALSE
CCDC112	0.958418	1.60143e-17	Macaque	0.577908	1.8523e-18	Macaque	0.572925	3.95309e-07	Macaque	0.877501	1.14564e-12	Macaque				1.04489	1.52664e-15	Macaque							FALSE
CCDC115				0.28123	4.9571e-07	Human										0.665697	0.00179155	Human							FALSE
CCDC117				0.513912	1.51004e-10	Macaque				0.627485	3.27374e-06	Macaque				0.591554	0.00838647	Macaque							FALSE
CCDC12				0.228138	0.000149732	Human	0.32459	7.03265e-05	Human																FALSE
CCDC136										0.871009	4.35916e-06	Macaque													FALSE
CCDC14				0.543054	3.81365e-26	Human	0.640203	4.57473e-18	Human	0.523442	0.0212265	Human				0.573758	0.0069569	Human							FALSE
CCDC167	1.04284	4.37352e-11	Human	0.507735	8.01864e-26	Human	0.428196	3.2256e-08	Human	0.751496	2.13397e-08	Human				0.614198	0.0182757	Human							FALSE
CCDC174	1.08004	6.25351e-20	Macaque	0.820251	4.71759e-22	Macaque				0.852283	2.88558e-10	Macaque				0.809681	3.95603e-05	Macaque							FALSE
CCDC184	0.605343	0.0321711	Human	0.37201	4.02492e-10	Human																			FALSE
CCDC186							0.286918	0.014842	Human																FALSE
CCDC25				0.559336	2.8353e-07	Macaque																			FALSE
CCDC28B	0.652009	0.00854969	Human							0.528526	9.32065e-06	Human													FALSE
CCDC47				0.533004	2.54644e-30	Human																			FALSE
CCDC50	1.43316	7.92459e-34	Macaque	1.4529	5.53245e-100	Macaque	0.958709	1.10043e-14	Macaque	1.66137	3.47894e-38	Macaque	2.55735	5.75091e-10	Macaque	1.93166	4.95041e-49	Macaque							FALSE
CCDC6	0.935881	1.19131e-14	Macaque	0.717783	1.5837e-20	Macaque				0.518764	0.00722489	Macaque				0.931701	1.55018e-10	Macaque							FALSE
CCDC71L	0.620452	3.89117e-07	Macaque																						FALSE
CCDC82	0.779746	1.27974e-09	Macaque	0.46021	8.99249e-07	Macaque				0.642505	0.00212576	Macaque													FALSE
CCDC84	0.450247	0.00167678	Macaque													0.626287	0.00215754	Macaque							FALSE
CCDC88A	1.90341	4.78843e-69	Macaque	1.48137	1.99433e-151	Macaque	1.19837	9.7048e-49	Macaque	1.60238	2.59192e-41	Macaque	2.37905	7.45099e-11	Macaque	1.32682	6.30874e-37	Macaque	1.19286	0.000115189	Macaque	1.58875	0.00392141	Macaque	FALSE
CCDC90B				0.330009	1.96901e-12	Human	0.342073	3.30153e-07	Human																FALSE
CCDC93				0.365519	4.13069e-15	Human	0.60195	2.2807e-16	Human																FALSE
CCDC97										0.453183	9.90414e-05	Macaque													FALSE
CCK							1.57572	6.22214e-19	Macaque																FALSE
CCND2				0.561014	6.98198e-27	Human				0.332257	0.00332664	Human													TRUE
CCNE2																0.975695	3.70779e-13	Human							FALSE
CCNG2	0.735345	7.89099e-09	Macaque				0.939404	1.33183e-15	Macaque																FALSE
CCNI	0.70467	1.46208e-21	Macaque	0.286767	1.13647e-10	Macaque	0.500882	5.22357e-25	Macaque	0.322618	0.0291924	Macaque	1.13569	2.06615e-05	Macaque	0.597335	5.18663e-17	Macaque							FALSE
CCNL2	0.631757	0.0230229	Human	0.553585	3.91085e-23	Human	0.47558	1.83309e-06	Human							0.749328	1.75308e-06	Human							FALSE
CCNT1	0.854682	1.58571e-12	Macaque	0.582216	2.73082e-17	Macaque				0.64373	8.53889e-06	Macaque													FALSE
CCNY																0.590303	0.0108964	Macaque							FALSE
CCP110	0.773819	1.28264e-09	Macaque	0.810712	2.52797e-26	Macaque	0.764349	1.63317e-06	Macaque	0.864076	7.52312e-10	Macaque				0.745123	0.000211945	Macaque							FALSE
CCS							0.688116	3.14663e-19	Human																TRUE
CCSAP	0.637096	1.15626e-06	Macaque													0.652838	0.0108801	Macaque							FALSE
CCSER1	0.804342	2.12605e-12	Macaque																						FALSE
CCT2	0.489115	9.59688e-05	Macaque	0.465939	5.00742e-11	Macaque	0.468302	9.41508e-07	Macaque																FALSE
CCT5				0.490693	5.63233e-22	Human	0.703157	1.46514e-27	Human							0.527062	0.0266751	Human							FALSE
CCZ1	0.542536	0.00220017	Human	0.776541	9.4544e-48	Human				0.47863	0.000491843	Human				0.865858	4.77675e-10	Human							FALSE
CD200	1.12455	5.04015e-20	Macaque	1.06193	1.15626e-43	Macaque	1.53118	1.58508e-48	Macaque	1.47522	3.57074e-29	Macaque				1.16487	2.33038e-17	Macaque							TRUE
CD46							0.397819	1.52457e-05	Human																FALSE
CD59				0.51603	9.72693e-22	Human	0.364143	1.40435e-08	Human	0.598869	2.50015e-06	Human													TRUE
CD63				0.399402	1.9984e-17	Human	0.328268	9.84522e-06	Human																TRUE
CD81	1.0332	1.10498e-18	Macaque				0.465135	1.17537e-07	Human	0.499421	0.0005562	Macaque				1.261	2.00519e-16	Macaque							FALSE
CD99																0.871714	6.669e-05	Macaque							FALSE
CDC34	0.497122	0.000267688	Macaque	0.380679	0.00112629	Macaque				0.362388	0.0284703	Macaque				0.655105	8.20468e-05	Macaque							FALSE
CDC40	0.569743	0.000952759	Macaque																						FALSE
CDC42				0.632357	5.89485e-38	Macaque	0.555931	7.19617e-12	Macaque	0.443296	0.00169749	Macaque				0.695404	3.47941e-08	Macaque							FALSE
CDC42BPB	0.763467	2.81714e-10	Macaque																						FALSE
CDC42EP4																0.599842	0.0184165	Human							FALSE
CDC42SE2				0.740195	5.38467e-20	Macaque	0.615786	0.00107055	Macaque	0.734698	4.53025e-08	Macaque				0.645799	0.0452763	Macaque							FALSE
CDC5L	0.741664	1.07569e-08	Macaque	0.466207	2.22083e-06	Macaque				0.624903	0.000257738	Macaque				0.760985	3.04288e-05	Macaque							TRUE
CDCA7				0.308146	0.00019433	Human																			FALSE
CDH2	0.416406	0.0011121	Macaque																						FALSE
CDH4	0.445764	0.0473681	Macaque																						FALSE
CDH8	0.949504	1.19844e-16	Macaque							1.18214	5.40242e-17	Macaque													FALSE
CDIP1				0.453836	1.15576e-09	Macaque																			FALSE
CDK11B				0.279715	4.6181e-11	Human																			FALSE
CDK12	0.615362	6.51268e-07	Macaque	0.566017	2.35244e-11	Macaque				0.620672	0.000448276	Macaque													FALSE
CDK13	1.16597	3.66655e-20	Macaque	0.735929	6.95295e-24	Macaque				0.888391	1.92928e-12	Macaque				0.81952	2.27792e-07	Macaque							FALSE
CDK14	0.785031	1.40839e-11	Macaque	0.688368	3.99871e-15	Macaque				0.96101	1.21068e-13	Macaque				1.06468	8.6573e-12	Macaque							FALSE
CDK17				0.348061	0.0109502	Macaque																			FALSE
CDK19	0.920499	2.87942e-13	Macaque	0.705689	2.30147e-21	Macaque	0.556924	0.00265678	Macaque	1.08451	4.91242e-17	Macaque				0.693658	0.000909287	Macaque							FALSE
CDK2AP1	0.740957	2.71662e-09	Macaque													1.45951	1.39965e-22	Macaque							FALSE
CDK4				0.443708	3.39532e-17	Human										0.537985	0.00333891	Human							FALSE
CDK5R1	1.01544	9.86877e-16	Macaque	1.01463	3.97199e-54	Macaque	0.568842	0.000765506	Macaque	1.05625	1.13581e-15	Macaque				1.50269	3.42299e-30	Macaque							FALSE
CDK5R2	0.511456	2.3164e-07	Macaque							0.491676	0.000435738	Macaque													FALSE
CDK5RAP3	0.904554	2.32666e-11	Human	0.784683	3.5304e-54	Human	0.597809	4.51751e-17	Human	0.70151	2.73521e-10	Human				0.840778	1.1722e-10	Human							FALSE
CDKL5	0.534316	6.17433e-06	Macaque																						FALSE
CDKN1C	0.722012	1.42096e-08	Macaque	0.26477	9.13883e-09	Human	0.436295	6.87856e-07	Human																FALSE
CDKN2D	0.419107	0.00807809	Macaque																						FALSE
CDO1				0.290633	1.8702e-07	Human	0.568119	4.47436e-13	Human	0.636127	2.8927e-05	Human													FALSE
CDS2				0.466349	1.43602e-07	Macaque				0.510467	0.000118623	Macaque				0.634282	0.0378799	Macaque							FALSE
CDV3	1.17694	1.22199e-21	Macaque	0.926659	7.18167e-29	Macaque	0.690355	3.27428e-05	Macaque	1.08778	1.62319e-16	Macaque				1.1666	4.26446e-14	Macaque							FALSE
CEBPZ	0.864143	4.67025e-12	Macaque	0.90477	2.63354e-32	Macaque										1.16396	4.75636e-19	Macaque							FALSE
CELF1	1.4604	8.80902e-44	Macaque	1.34811	4.12022e-106	Macaque	1.29153	5.15182e-39	Macaque	1.5353	2.09832e-36	Macaque				1.35401	3.41693e-23	Macaque	1.56127	0.0324369	Macaque	1.65109	0.0138443	Macaque	FALSE
CELF2	1.06615	2.13732e-20	Macaque	0.915524	2.54878e-47	Macaque	0.606104	0.00473054	Macaque	1.03464	1.32262e-16	Macaque				1.38673	1.82362e-29	Macaque							FALSE
CELF3	0.600661	8.58166e-06	Macaque	0.528969	1.83322e-13	Macaque	0.928288	4.74466e-13	Macaque	0.699065	6.42826e-06	Macaque													FALSE
CELF4	0.954104	2.01041e-19	Macaque	1.13507	2.22599e-76	Macaque	1.41617	9.46902e-48	Macaque	1.13799	1.07446e-19	Macaque	1.60733	0.00314877	Macaque	1.4108	3.1468e-27	Macaque							FALSE
CELF5	0.581937	2.12979e-06	Macaque	0.607554	2.41212e-14	Macaque				0.973877	1.55931e-12	Macaque				1.13662	6.10077e-13	Macaque							FALSE
CELSR2	0.64704	5.45498e-05	Macaque							0.844987	2.41703e-09	Macaque				0.629574	0.00513707	Macaque							FALSE
CELSR3				0.511599	1.95196e-11	Macaque				0.46197	0.0144332	Macaque													FALSE
CENPB										0.510994	2.35728e-05	Macaque													FALSE
CENPC	0.603159	2.41445e-05	Macaque	0.454849	0.00146627	Macaque				0.570808	0.00458888	Macaque													FALSE
CENPV				0.240256	3.07122e-07	Human																			FALSE
CEP162	0.403289	0.00356493	Macaque							0.640393	0.00664481	Macaque													TRUE
CEP170	0.447103	0.0046174	Macaque										1.11232	0.0267147	Macaque										FALSE
CEP250	0.58699	3.50262e-06	Macaque																						FALSE
CEP290							0.254118	0.0013365	Human																FALSE
CEP295	0.696557	7.26809e-09	Macaque	0.7763	1.53736e-28	Macaque				0.755088	1.21072e-07	Macaque				0.785462	2.71593e-06	Macaque							FALSE
CEP350	1.1209	3.22665e-18	Macaque	0.56036	3.96133e-08	Macaque				0.706947	4.23559e-05	Macaque													FALSE
CEP57							0.465556	1.04902e-08	Human																FALSE
CEP57L1	1.0412	1.05169e-16	Macaque	0.598807	5.78812e-13	Macaque	0.742342	1.52954e-08	Macaque	0.837624	6.19927e-09	Macaque													TRUE
CEP63							0.421811	4.04148e-08	Human																TRUE
CEP70	0.493585	0.00023206	Macaque																						TRUE
CEP78							0.405174	1.05181e-07	Human																FALSE
CEP85L	0.52644	0.00351666	Macaque	0.446831	0.000806525	Macaque																			FALSE
CEP97	0.53285	2.71733e-05	Macaque																						FALSE
CERS5				0.425501	0.00127058	Macaque										0.588336	0.000835402	Macaque							FALSE
CERS6	0.572295	4.5559e-05	Macaque																						FALSE
CFAP97	0.468823	0.020902	Macaque																						FALSE
CFDP1	0.654866	1.09823e-07	Macaque	0.643743	4.97549e-26	Macaque	0.573806	1.32255e-07	Macaque	0.68624	7.78799e-08	Macaque				0.731915	4.60728e-05	Macaque							FALSE
CFL1							0.308052	0.000279785	Macaque	0.228731	0.0151525	Human				0.566406	4.05953e-13	Human							FALSE
CFL2							0.328929	1.50754e-06	Human																FALSE
CGGBP1	1.00182	1.38365e-21	Macaque	1.00461	8.70868e-51	Macaque	0.818316	3.57586e-12	Macaque	0.982469	1.18719e-14	Macaque				0.95809	1.52129e-08	Macaque							FALSE
CHAMP1										0.462327	0.0228734	Macaque													TRUE
CHCHD10							0.855436	1.78421e-14	Macaque	0.689383	0.000214767	Macaque													FALSE
CHCHD2	0.822835	6.22407e-17	Human	0.485998	1.08219e-43	Human	0.503944	9.33522e-20	Human	0.795059	2.37671e-23	Human													FALSE
CHD2	0.66917	6.11702e-07	Macaque	0.505817	0.000265653	Macaque				0.747857	6.50462e-07	Macaque													FALSE
CHD3	1.72486	4.36127e-48	Macaque	1.05131	1.50214e-46	Macaque				0.822255	3.84412e-10	Macaque	2.01935	7.27806e-06	Macaque	0.606992	0.0133922	Macaque							FALSE
CHD5							0.419646	1.34953e-08	Human																FALSE
CHD6	0.438794	0.00080981	Macaque																						FALSE
CHD7	0.750781	1.02319e-06	Macaque										1.60152	0.0264263	Macaque										FALSE
CHD8	1.04964	3.79327e-17	Macaque	0.931048	7.9227e-34	Macaque				0.778234	3.32085e-08	Macaque				0.756957	1.57822e-05	Macaque							FALSE
CHGB	0.552913	0.00107877	Macaque																						FALSE
CHL1	1.31177	4.72081e-23	Macaque	0.746039	4.289e-28	Macaque				0.909382	8.09813e-12	Macaque	1.86048	0.00740946	Macaque	1.44532	1.0254e-22	Macaque							FALSE
CHM	0.587767	3.76288e-06	Macaque	0.480032	2.09329e-08	Macaque				0.663833	6.25038e-06	Macaque													FALSE
CHML				0.679627	4.24389e-43	Human	0.735125	4.13681e-21	Human	0.569523	1.3205e-05	Human													FALSE
CHMP1B				0.395735	2.81682e-15	Human										0.885572	3.70601e-09	Human							FALSE
CHMP2B	0.765491	8.76143e-09	Macaque	0.792047	9.39146e-25	Macaque				1.11031	2.48757e-13	Macaque													FALSE
CHMP3	0.48704	0.0320817	Macaque																						TRUE
CHMP4A	0.658609	9.31186e-06	Human	0.83831	4.19663e-64	Human	0.669132	1.40075e-20	Human	0.807407	3.69266e-12	Human				0.90642	1.7304e-11	Human							FALSE
CHMP5	0.629706	0.000977746	Human	0.503364	6.53343e-31	Human																			FALSE
CHORDC1	0.603058	0.000301358	Macaque	0.612866	5.99955e-11	Macaque	0.762033	4.90734e-05	Macaque																TRUE
CHRNA7										0.899262	5.62787e-11	Macaque													FALSE
CHST10	0.480253	0.00133027	Macaque	0.424579	0.000940849	Macaque																			FALSE
CHST11	0.608119	4.36167e-07	Macaque	0.572296	1.59535e-15	Macaque				0.550451	0.000201899	Macaque													FALSE
CHST7				0.504019	1.84277e-16	Macaque				0.475717	0.0483964	Macaque													FALSE
CIAO1																0.682275	0.000658783	Macaque							FALSE
CIC										0.488843	0.000101825	Macaque				0.586599	0.00469504	Macaque							FALSE
CIRBP	0.76819	2.5713e-23	Human	0.526871	5.5339e-40	Human	0.60109	2.3242e-25	Human	0.877256	9.51302e-29	Human				0.705908	8.19242e-16	Human							FALSE
CISD1				0.410783	0.000107973	Macaque	0.610277	0.0065842	Macaque																FALSE
CISD2				0.415576	9.92457e-18	Human	0.286799	0.00248646	Human																TRUE
CKAP4	0.58482	7.0917e-06	Macaque	0.444234	0.000139246	Macaque				0.5461	0.00427848	Macaque													TRUE
CKAP5	0.424475	0.000791267	Macaque	0.423468	0.000162992	Macaque																			FALSE
CKB				0.441436	1.09035e-34	Human				0.304851	0.000185853	Human				1.1228	1.376e-30	Human							FALSE
CKS1B																0.57844	0.000143693	Human							FALSE
CLASP1	1.08819	1.51094e-18	Macaque	1.25514	1.23376e-75	Macaque	1.09852	7.26382e-25	Macaque	1.56456	1.1724e-33	Macaque				1.385	3.89559e-22	Macaque							FALSE
CLASP2	0.830362	1.55392e-12	Macaque	0.86729	6.19717e-37	Macaque				0.7682	8.75759e-07	Macaque				0.641776	0.00894281	Macaque							FALSE
CLCN3	0.438875	0.0146143	Macaque	0.373417	0.000142556	Macaque																			FALSE
CLCN6										0.503524	9.95716e-05	Macaque													FALSE
CLIC4	0.492818	0.000614151	Macaque	0.930845	6.54385e-34	Macaque	1.36767	1.33718e-34	Macaque	0.76135	2.19708e-06	Macaque				0.911272	6.14987e-07	Macaque							FALSE
CLIP1	0.521389	0.0011452	Macaque																						FALSE
CLIP2	0.572842	0.000419191	Macaque	0.748029	6.82708e-22	Macaque				0.681594	2.82181e-08	Macaque				0.836905	1.20148e-07	Macaque							FALSE
CLIP3	0.847852	7.26137e-11	Macaque	0.744967	8.42314e-19	Macaque	0.60647	0.0064892	Macaque							1.12409	9.396e-13	Macaque							FALSE
CLPB	0.679188	1.58554e-10	Macaque	0.80631	2.04291e-42	Macaque				1.10926	3.2983e-19	Macaque				0.723976	2.06042e-08	Macaque							FALSE
CLSTN1	0.486322	0.00815203	Macaque							0.526171	0.000717477	Macaque													FALSE
CLTA				0.35573	8.72034e-05	Macaque	0.528184	4.16408e-07	Macaque																FALSE
CLTB				0.396759	3.70047e-05	Macaque																			FALSE
CLTC	0.737515	1.06054e-09	Macaque	0.671144	6.757e-18	Macaque				0.765429	2.80755e-07	Macaque				0.680117	0.00085601	Macaque							FALSE
CLU	0.873568	7.61331e-09	Human										1.6979	0.0415642	Human										FALSE
CMIP	0.737526	4.06255e-09	Macaque	0.658033	2.41781e-17	Macaque				0.663145	0.00169817	Macaque				0.854888	1.46501e-07	Macaque							FALSE
CMPK1				0.428541	3.59965e-17	Human										0.507648	0.0409773	Human							FALSE
CMSS1										0.512657	0.00953509	Human													TRUE
CNIH2	0.890903	2.30737e-11	Macaque	0.50788	3.02651e-12	Macaque	0.29658	0.0261062	Human	0.765655	1.05162e-08	Macaque				1.10266	1.30092e-13	Macaque							FALSE
CNKSR2										0.411867	0.00647728	Macaque													FALSE
CNN3							0.743408	3.45214e-11	Macaque							1.17758	1.25058e-16	Macaque							FALSE
CNOT6	0.777434	1.47078e-10	Macaque	0.600544	5.9517e-15	Macaque				0.80239	8.90565e-11	Macaque				0.589351	0.0264641	Macaque							FALSE
CNP				0.402702	1.25667e-06	Macaque																			TRUE
CNPY2				0.320193	1.69078e-11	Human																			TRUE
CNR1	0.577409	3.52791e-07	Macaque							0.508995	0.000381719	Macaque													FALSE
CNTFR				0.276879	6.66405e-05	Human	0.257055	0.046074	Human																FALSE
CNTNAP2	0.680826	4.31133e-05	Macaque				0.296686	1.72507e-06	Human	0.687829	0.000195853	Macaque													FALSE
COL4A2	0.785554	9.14086e-12	Macaque	0.571285	1.89276e-20	Macaque				0.72213	3.95886e-08	Macaque				0.67372	1.79189e-06	Macaque							FALSE
COMMD2				0.536308	4.77707e-24	Human	0.631914	1.27715e-16	Human																FALSE
COMMD3	0.833078	1.42305e-10	Human	0.973198	1.08577e-81	Human	0.418733	5.81338e-15	Human	0.768344	5.99271e-17	Human				1.1128	5.10184e-17	Human	1.28104	0.0325825	Human				FALSE
COMMD6	1.1778	1.92364e-33	Human	0.848504	1.13806e-83	Human	0.555993	3.57796e-23	Human	1.27451	1.45091e-40	Human				1.01652	1.6268e-31	Human							FALSE
COMMD7	0.740117	5.86177e-08	Human	0.916142	3.95697e-64	Human	0.342578	1.65096e-07	Human	0.462798	0.000302024	Human				1.0786	7.55432e-18	Human	1.49464	7.08557e-05	Human				FALSE
COMMD9				0.491221	6.54721e-08	Macaque																			FALSE
COPA	0.471859	1.99433e-05	Macaque	0.432027	0.00333544	Macaque				0.591337	0.00165104	Macaque													FALSE
COPB2	0.889291	1.38925e-12	Macaque	0.431827	0.000912359	Macaque																			FALSE
COPE	0.722576	8.15567e-06	Human							0.397398	0.000690815	Human													FALSE
COPS6				0.431195	2.91314e-05	Macaque																			FALSE
COPZ1							0.634298	0.00253709	Macaque																TRUE
COQ7				0.497534	3.73892e-26	Human	0.648843	2.2933e-17	Human	0.613383	2.24529e-06	Human													TRUE
CORO2B	0.95964	6.00367e-13	Macaque	0.736355	2.89518e-22	Macaque				0.987894	5.71727e-15	Macaque				0.835308	2.13144e-06	Macaque							FALSE
CORT										0.977317	2.19481e-11	Macaque													FALSE
COX14				0.568187	6.86107e-09	Macaque	0.588159	0.00378406	Macaque																TRUE
COX19	1.04745	1.24914e-17	Macaque	1.19294	1.91134e-59	Macaque	0.914712	3.3427e-14	Macaque	1.13348	7.37816e-15	Macaque				1.49815	4.88696e-28	Macaque							TRUE
COX20	1.04928	7.87138e-11	Human	0.717094	2.45856e-47	Human	0.601995	3.34837e-17	Human	0.798959	2.15688e-10	Human													TRUE
COX4I1	0.880527	8.7105e-26	Human	0.283553	6.66958e-12	Human										0.364622	0.00638775	Human							FALSE
COX5B	0.713633	2.28278e-08	Human	0.280777	1.38111e-13	Human				0.740253	1.27341e-17	Human													TRUE
COX6B1	0.730234	7.80401e-11	Human	0.231761	1.37982e-05	Human				0.576003	9.36631e-09	Human													FALSE
COX6C	0.515924	6.83978e-05	Human							0.3991	3.11278e-07	Human													FALSE
COX7A2	1.18074	2.27988e-42	Human				0.704253	3.35684e-29	Human	0.843027	7.55972e-28	Human													TRUE
COX7A2L	1.28191	8.23205e-27	Human	1.43118	3.00297e-143	Human	0.791377	3.54719e-36	Human	1.25812	2.40566e-30	Human				1.3048	1.32974e-25	Human	1.05978	0.0252839	Human				TRUE
COX7B				0.543159	2.0859e-16	Macaque	0.57189	0.00246032	Macaque							0.606642	0.000542671	Macaque							FALSE
COX7C	1.64735	3.54152e-65	Human	1.5135	1.78296e-252	Human	1.78432	3.04212e-141	Human	1.97175	7.78598e-93	Human				0.873614	7.77778e-27	Human				1.54562	0.000546919	Human	TRUE
CPE				0.756607	2.75652e-37	Human	0.611167	8.97952e-15	Human							1.28587	9.60702e-19	Human							FALSE
CPEB4	0.744985	7.0261e-09	Macaque	0.707668	6.69013e-20	Macaque	0.593036	6.14738e-05	Macaque	0.564714	0.00104997	Macaque				1.01653	5.40021e-12	Macaque							FALSE
CPLX2	0.587679	0.00028378	Macaque	0.789523	9.42841e-25	Macaque				0.925517	1.38703e-11	Macaque				0.732254	2.28379e-05	Macaque							FALSE
CPSF3	0.599088	2.6787e-06	Macaque	0.546775	7.93918e-06	Macaque	0.761081	9.8918e-09	Macaque	0.803016	1.00691e-10	Macaque													TRUE
CPSF6	0.745753	1.00594e-09	Macaque	0.570435	4.32257e-13	Macaque				0.717745	5.9353e-07	Macaque													FALSE
CRABP1																0.76132	4.6903e-05	Macaque							TRUE
CRB1																0.609176	3.83606e-05	Human							FALSE
CRBN	1.048	6.36217e-12	Human	0.88817	1.7041e-69	Human	0.846038	4.66517e-30	Human	0.731435	3.35971e-07	Human				1.12491	1.92075e-17	Human	1.25755	0.00326459	Human				FALSE
CRCP				0.267995	1.7556e-08	Human	0.367867	0.000116494	Human																FALSE
CREB3							0.30491	0.000381731	Human																TRUE
CREB3L4	0.671173	2.10922e-07	Macaque							0.559423	3.18237e-05	Macaque													TRUE
CREBBP	1.18113	3.16726e-22	Macaque	1.03321	9.9486e-52	Macaque				1.02077	5.77322e-16	Macaque				1.25998	8.94906e-20	Macaque							FALSE
CREBRF										0.59616	0.000214097	Macaque				0.643338	0.0027054	Macaque							FALSE
CREBZF	0.621049	4.60167e-08	Macaque							0.692303	2.21122e-07	Macaque													FALSE
CRIP2	0.712827	1.12526e-05	Human	0.418255	1.27822e-17	Human				0.612523	7.34037e-06	Human				0.641778	0.000222379	Human							FALSE
CRK	0.892506	2.08324e-14	Macaque																						FALSE
CRKL				0.424163	7.32747e-05	Macaque				0.532148	0.000683804	Macaque													FALSE
CRMP1							0.332689	0.000130172	Macaque																FALSE
CROCC				0.497337	9.50943e-25	Human										0.840336	3.72045e-10	Human							FALSE
CRTC1	0.68052	4.40319e-07	Macaque	0.690439	1.43002e-20	Macaque				0.776181	3.41556e-11	Macaque				0.901239	4.29796e-08	Macaque							FALSE
CRYZL1							0.255247	0.006336	Human																FALSE
CS	0.507759	0.0177774	Macaque	0.671125	1.32465e-25	Macaque				0.630161	6.1142e-06	Macaque				0.915176	3.35064e-11	Macaque							FALSE
CSDE1				0.523976	1.44418e-20	Macaque																			FALSE
CSK	0.550957	5.10866e-05	Macaque	0.581658	5.16665e-18	Macaque				0.49607	0.000195091	Macaque				0.580538	0.00205194	Macaque							FALSE
CSNK1D				0.444086	3.08e-06	Macaque																			FALSE
CSNK1E				0.458624	1.61685e-17	Human	0.817061	7.50711e-23	Human																FALSE
CSNK1G1	0.727522	4.99193e-08	Macaque	0.734938	4.73476e-28	Macaque				0.799183	3.23438e-10	Macaque				0.837509	5.58266e-06	Macaque							FALSE
CSNK1G2	0.709838	1.23885e-11	Macaque																						FALSE
CSNK1G3	0.666874	1.01842e-07	Macaque	0.860293	3.04113e-29	Macaque	0.753644	2.31312e-08	Macaque	0.632413	9.26954e-06	Macaque				0.867334	2.53062e-06	Macaque							FALSE
CSNK2A1	1.35259	6.89898e-33	Macaque	1.19317	9.69492e-78	Macaque	0.809036	1.04762e-09	Macaque	1.0083	9.02248e-16	Macaque				1.21871	6.14179e-18	Macaque							FALSE
CSPP1	0.716548	1.22498e-07	Macaque																						TRUE
CSRNP2										0.500777	0.0022382	Macaque													FALSE
CSRNP3	1.11981	2.57955e-22	Macaque	0.788288	1.15903e-26	Macaque				0.938319	1.20175e-12	Macaque				0.895742	3.7221e-07	Macaque							FALSE
CSRP2	1.75681	4.68952e-32	Human	0.761092	7.41994e-32	Human				0.667513	3.83435e-08	Human													FALSE
CST3				0.382475	9.47057e-09	Human				0.659465	0.00170092	Human													FALSE
CTBP1	0.779401	1.83021e-11	Macaque	0.7064	2.32202e-20	Macaque				0.614271	0.000118089	Macaque				0.884382	7.40699e-09	Macaque							FALSE
CTBP2	0.749992	1.68197e-07	Macaque	0.468415	0.00194427	Macaque				0.561882	0.0116386	Macaque				0.864725	5.34302e-07	Macaque							FALSE
CTCF	1.1264	5.98246e-23	Macaque	0.775523	7.10392e-30	Macaque				0.791575	4.39186e-08	Macaque				0.90403	3.7968e-08	Macaque							FALSE
CTDNEP1							0.681407	3.78207e-20	Human																FALSE
CTDSPL2	0.484419	0.00179877	Macaque																						FALSE
CTNNA2	0.406114	0.027237	Macaque	0.443807	0.000173257	Macaque				0.799384	5.7818e-09	Macaque				0.672229	8.11938e-05	Macaque							FALSE
CTNNAL1	0.46038	0.00075161	Macaque																						TRUE
CTNNB1	0.493618	0.00849627	Macaque	0.623593	7.12769e-12	Macaque	0.798785	1.53139e-07	Macaque																FALSE
CTNNBIP1				0.418714	5.30079e-22	Human										0.93137	1.16306e-11	Human							FALSE
CTNND2	0.789605	1.25607e-10	Macaque	0.401217	0.00176772	Macaque	0.338634	3.9516e-05	Human	0.738215	3.41396e-08	Macaque				0.840707	9.57054e-08	Macaque							FALSE
CTPS1	0.54707	2.79884e-05	Macaque							0.625897	2.06215e-05	Macaque				0.570357	0.0417259	Macaque							TRUE
CTTNBP2	0.641567	6.52117e-06	Macaque																						FALSE
CTXN1	1.35246	1.06235e-28	Macaque	0.916905	7.03532e-37	Macaque				0.552372	0.0302844	Macaque	2.00117	5.48847e-05	Macaque	1.33818	6.49439e-21	Macaque							FALSE
CUEDC1	0.562249	8.29337e-07	Macaque																						FALSE
CUEDC2				0.386147	4.36727e-19	Human	0.250978	0.00043484	Human																FALSE
CUL3	1.12019	1.26395e-17	Macaque	0.497982	4.21607e-05	Macaque				0.651738	2.57869e-05	Macaque				0.708953	0.000440232	Macaque							FALSE
CUL5										0.468508	0.0470894	Macaque													FALSE
CUTA	0.959954	1.14929e-09	Human	0.413592	3.25099e-21	Human	0.514835	5.06596e-11	Human	0.793004	5.35691e-12	Human				0.915723	2.41538e-10	Human							FALSE
CUX1	1.17903	2.42857e-25	Macaque	1.05828	6.767e-62	Macaque				1.11574	2.41265e-17	Macaque				1.34662	1.10024e-18	Macaque							TRUE
CUX2	1.30781	3.87146e-23	Macaque	0.8155	8.99638e-27	Macaque				1.03019	1.18536e-13	Macaque	1.56316	0.00345505	Macaque	1.14621	4.79441e-14	Macaque							FALSE
CWC15				0.421516	3.59506e-05	Macaque																			FALSE
CWF19L2							0.284267	0.000352829	Human																FALSE
CXCL14										1.83714	3.82253e-14	Human													FALSE
CXCR4	0.944472	1.775e-11	Human	0.633481	1.23652e-25	Human	0.770091	1.06401e-22	Human	0.714481	1.03817e-08	Human				0.766795	0.000236867	Human							FALSE
CXXC4	0.620432	0.000152765	Macaque	0.536426	4.82629e-10	Macaque				0.919364	1.55217e-09	Macaque				0.686897	0.00117419	Macaque							FALSE
CYB5R3							0.588656	0.00136407	Macaque																FALSE
CYC1				0.481261	8.17446e-07	Macaque	0.896581	1.67642e-17	Macaque																FALSE
CYCS	1.06999	1.20685e-14	Human	0.638676	5.10678e-33	Human	0.74543	1.23188e-22	Human	0.643661	3.22503e-07	Human													FALSE
CYFIP2	0.94782	1.59233e-17	Macaque	0.929843	3.05542e-39	Macaque	0.646746	4.26928e-05	Macaque	1.17793	3.77682e-20	Macaque				0.729667	1.4946e-05	Macaque							FALSE
CYTH2							0.794412	2.50481e-14	Macaque																FALSE
DAAM1							0.55408	3.50912e-12	Human																TRUE
DACT1	1.49925	3.88297e-32	Macaque	0.614625	1.00025e-14	Macaque				0.816651	1.415e-10	Macaque				0.827806	1.96026e-06	Macaque							FALSE
DACT3	0.537387	4.05861e-06	Macaque							0.671879	3.20505e-10	Macaque													FALSE
DAP	0.481299	0.000269195	Macaque																						FALSE
DAPK1	0.526002	0.000685373	Macaque	0.416196	3.40552e-05	Macaque				0.48176	0.0287658	Macaque													FALSE
DAZAP1	0.835998	6.28588e-14	Macaque	0.516446	9.28185e-10	Macaque	0.745982	3.96569e-09	Macaque																FALSE
DAZAP2							0.661053	9.21999e-05	Macaque																FALSE
DBI	1.5874	8.64761e-33	Human	1.48011	1.80219e-137	Human	1.35298	9.78358e-67	Human	1.26553	1.72248e-29	Human				1.21619	1.25339e-22	Human	1.61584	4.70185e-06	Human				FALSE
DBN1	0.654582	2.6071e-10	Macaque	0.620217	8.81787e-28	Macaque	1.00184	1.39101e-35	Macaque	0.855011	2.27979e-11	Macaque	1.20717	0.0263405	Macaque							1.81945	0.00286609	Macaque	FALSE
DCAF10	0.676238	8.49521e-06	Macaque	0.679092	2.59956e-14	Macaque	0.59225	0.000714929	Macaque	0.773044	4.43549e-06	Macaque													FALSE
DCAF13				0.30576	2.69872e-12	Human	0.328677	0.00134783	Human																FALSE
DCAF5	0.920069	2.34652e-14	Macaque	0.699532	3.4216e-22	Macaque				0.832684	1.19756e-10	Macaque				0.732212	6.69589e-06	Macaque							FALSE
DCAF7	0.594936	2.0681e-05	Macaque	0.425198	0.0030726	Macaque				0.558717	0.011985	Macaque													FALSE
DCBLD2																0.927001	7.44208e-07	Macaque							FALSE
DCK	1.29312	1.22404e-20	Human	0.92864	1.39914e-69	Human	0.749829	1.21876e-21	Human	0.773612	1.62014e-08	Human				1.38765	2.51338e-24	Human							TRUE
DCLK1	1.43564	1.35481e-37	Macaque	1.40582	5.72635e-107	Macaque	0.876047	7.59189e-17	Macaque	1.44783	8.29346e-34	Macaque	2.03909	3.80032e-08	Macaque	1.76422	1.29056e-44	Macaque	1.24624	0.0366623	Macaque	1.86098	0.000361338	Macaque	FALSE
DCLK2	2.21313	7.10359e-68	Macaque	1.35219	2.43078e-105	Macaque	1.68873	3.5352e-64	Macaque	1.45483	1.35626e-27	Macaque	2.43852	1.20109e-08	Macaque	0.625631	4.02317e-06	Macaque							FALSE
DCN	0.919721	0.000370412	Macaque	0.652387	5.66595e-12	Macaque										0.867043	5.48307e-10	Macaque							TRUE
DCPS																0.55719	0.00825707	Macaque							TRUE
DCTN1	0.549084	4.67054e-05	Macaque							0.725277	2.13041e-06	Macaque													FALSE
DCTN2							0.529914	0.000301089	Macaque																FALSE
DCTN3				0.502256	1.59054e-14	Macaque										0.624733	0.00181093	Macaque							FALSE
DCTN4				0.337494	0.0256239	Macaque				0.63602	0.00140957	Macaque													FALSE
DCTN5	0.703634	4.61552e-07	Macaque	0.47693	1.73842e-05	Macaque																			FALSE
DCUN1D4				0.537741	5.5144e-11	Macaque				0.579174	0.000379404	Macaque				0.633029	0.00907921	Macaque							FALSE
DCX	1.03271	5.19023e-44	Macaque	1.06272	1.83141e-157	Macaque	0.350862	5.3794e-06	Macaque	0.966185	2.26114e-27	Macaque	1.27675	4.30174e-06	Macaque	1.27465	3.77963e-62	Macaque				1.51959	0.000288837	Macaque	FALSE
DDA1							0.545003	0.0303441	Macaque																FALSE
DDAH2	1.27876	3.43589e-36	Human	0.803766	1.37708e-78	Human	0.472073	2.1024e-13	Human	1.14621	8.10944e-26	Human	1.52186	0.00282588	Human	1.09865	2.33075e-25	Human	1.21072	0.000566405	Human				FALSE
DDB1	0.566652	2.18215e-05	Macaque							0.527037	0.0149506	Macaque													FALSE
DDHD2				0.520463	2.44247e-07	Macaque				0.635301	3.40383e-07	Macaque				0.614837	0.0074838	Macaque							FALSE
DDOST	0.812972	2.90189e-12	Macaque	0.769511	4.35439e-26	Macaque	1.00835	1.19933e-21	Macaque	1.14251	1.02714e-17	Macaque				0.737295	1.48582e-05	Macaque							FALSE
DDR1							0.709158	4.04533e-07	Macaque	0.599829	0.00282648	Macaque													FALSE
DDRGK1	0.457901	0.0301755	Macaque	0.525746	7.37924e-08	Macaque	0.615317	0.000286532	Macaque																FALSE
DDX17	1.74833	9.90709e-71	Macaque	1.47646	3.14192e-197	Macaque	1.48061	4.56115e-86	Macaque	1.97332	2.55049e-81	Macaque	1.58584	1.04054e-07	Macaque	1.55684	2.76346e-48	Macaque	1.12733	0.00100084	Macaque	2.41598	1.42326e-07	Macaque	TRUE
DDX18	0.500005	3.65296e-05	Macaque	0.832123	7.83415e-38	Macaque	0.643985	1.99212e-07	Macaque	0.720706	9.55785e-07	Macaque				0.964874	5.19055e-13	Macaque							TRUE
DDX21							0.334309	0.00017392	Human																FALSE
DDX23	0.534581	0.000315538	Macaque	0.521434	3.06009e-11	Macaque				0.600775	0.000362189	Macaque													FALSE
DDX24							0.333292	5.70748e-06	Human							0.510291	0.00330827	Macaque							FALSE
DDX27				0.26204	3.86462e-09	Human																			FALSE
DDX39B	0.850134	2.08529e-10	Macaque	0.825104	6.89886e-23	Macaque	0.889876	4.64535e-09	Macaque	0.766017	9.06613e-06	Macaque				1.03616	2.0433e-09	Macaque							FALSE
DDX42	0.978055	2.00994e-16	Macaque	0.629858	3.38172e-16	Macaque				0.854169	5.19951e-10	Macaque													FALSE
DDX46	0.623784	0.000953364	Macaque							0.520235	0.00930485	Macaque													FALSE
DDX49							0.248388	0.00503695	Human																TRUE
DDX5																0.610413	2.18449e-14	Human							TRUE
DDX52				0.231128	5.11195e-05	Human	0.370815	1.3664e-06	Human																FALSE
DDX6	1.191	2.2382e-29	Macaque	1.03027	8.26404e-68	Macaque				1.32629	1.61515e-26	Macaque	0.996474	0.026798	Macaque	1.36648	9.36317e-32	Macaque				1.91698	0.00154441	Macaque	FALSE
DEAF1				0.2509	0.000147368	Human	0.257394	0.0136495	Human																FALSE
DEK	0.652305	8.49389e-07	Macaque	0.373302	0.0356672	Macaque										0.68689	0.000197576	Macaque							FALSE
DENND5B										0.542802	0.00235917	Macaque													FALSE
DENND6A										0.444429	0.011823	Macaque													FALSE
DENR				0.46967	0.00314175	Macaque										0.824817	6.65836e-06	Macaque							FALSE
DGKD	0.504336	0.00255207	Macaque																						FALSE
DGUOK	0.650683	0.00103681	Human	0.561182	4.56529e-34	Human	0.657104	1.43833e-20	Human	0.751617	2.76518e-09	Human													TRUE
DHPS	0.673121	0.000215781	Human	0.88161	5.58553e-65	Human	0.735055	2.60974e-29	Human	0.686887	4.03451e-11	Human				1.06702	3.38859e-16	Human							TRUE
DHX29	0.461912	0.02992	Macaque																						FALSE
DHX36	0.984652	7.57209e-18	Macaque	0.843307	8.14776e-35	Macaque				0.88992	1.39181e-10	Macaque	1.51564	0.0010302	Macaque	1.12029	3.24647e-18	Macaque							FALSE
DHX57										0.44974	0.0103706	Macaque													FALSE
DHX9	0.766014	6.20565e-10	Macaque							0.575563	0.00661857	Macaque													FALSE
DIAPH1	0.480929	0.00212061	Macaque	0.388284	0.000415091	Macaque				0.549908	3.97283e-06	Macaque													FALSE
DICER1	0.852641	2.36351e-12	Macaque	0.779964	1.13573e-21	Macaque				1.03691	3.60764e-13	Macaque				0.988674	4.38401e-10	Macaque							FALSE
DIDO1	0.641809	1.41401e-07	Macaque	0.482925	9.76615e-08	Macaque				0.591181	0.00135899	Macaque													FALSE
DIP2B	0.629781	4.81542e-07	Macaque	0.355672	0.0101283	Macaque				0.46093	0.045744	Macaque				0.518688	0.0155629	Macaque							FALSE
DIRAS1	0.440458	0.000529646	Macaque																						FALSE
DKK3																0.620027	0.000491562	Macaque							FALSE
DLG2	0.628591	5.98992e-05	Macaque	0.738346	2.41974e-22	Macaque				0.727746	3.24784e-07	Macaque				1.21242	1.07156e-12	Macaque							FALSE
DLG3	0.904867	3.7254e-16	Macaque	0.646561	8.07421e-21	Macaque				0.680582	5.15683e-08	Macaque				0.602257	0.00096389	Macaque							FALSE
DLG4	0.391842	0.00348866	Macaque							0.638028	6.79972e-07	Macaque													FALSE
DLGAP1	1.53187	1.18485e-38	Macaque	1.68878	4.92097e-141	Macaque	0.94429	6.9749e-16	Macaque	1.57132	2.81236e-36	Macaque	2.16988	1.92112e-06	Macaque	1.77587	6.77237e-33	Macaque	1.6529	0.0262135	Macaque	1.76491	0.0130338	Macaque	FALSE
DLGAP2	1.50051	2.14105e-29	Macaque	1.30586	3.02292e-79	Macaque	0.821261	9.23738e-14	Macaque	1.21172	6.41861e-20	Macaque				1.02453	1.71477e-12	Macaque	1.56005	0.0166349	Macaque				FALSE
DLL3				0.836713	3.1588e-60	Human				0.719765	1.20847e-08	Human				0.848355	4.45356e-11	Human	1.13687	0.0325825	Human				TRUE
DLX1	0.837017	1.47217e-16	Macaque	0.986514	1.41629e-68	Macaque	0.976564	1.86607e-22	Macaque	0.957853	3.17349e-15	Macaque				1.01902	9.09001e-18	Macaque							FALSE
DLX2				0.50424	1.47257e-25	Human										0.915541	1.26843e-20	Human							FALSE
DLX5				0.871349	2.44151e-64	Human	0.664365	2.27116e-16	Human	0.871151	9.60407e-12	Human				0.953366	1.31225e-22	Human	1.33065	2.32821e-05	Human				FALSE
DLX6	1.43894	7.8575e-29	Macaque	1.12643	1.99039e-59	Macaque	0.887661	6.49709e-13	Macaque	1.16173	4.04172e-16	Macaque				0.948611	8.51032e-13	Macaque							FALSE
DMTF1	0.662352	2.03512e-06	Macaque	0.498763	7.42087e-06	Macaque										0.713805	0.000371662	Macaque							TRUE
DMWD										0.402298	0.0112236	Macaque													FALSE
DMXL1	0.382755	0.0201758	Macaque																						TRUE
DMXL2	0.520593	0.000170733	Macaque	0.409901	0.000600947	Macaque				0.696719	1.26544e-09	Macaque													FALSE
DNAAF2				0.225472	1.84627e-05	Human																			FALSE
DNAJB1				1.308	8.90456e-23	Macaque	2.23918	2.4352e-50	Macaque										2.36638	0.000256051	Macaque				FALSE
DNAJB12	0.421958	0.0422997	Macaque							0.444281	0.0434976	Macaque													FALSE
DNAJB6	0.876878	3.68809e-17	Human				0.540658	5.86258e-25	Human																TRUE
DNAJB9				0.436981	1.99855e-17	Human	0.446638	3.11389e-08	Human	0.581354	6.09448e-05	Human				0.611899	0.000485433	Human							FALSE
DNAJC2	0.344068	0.017559	Macaque																						FALSE
DNAJC21							0.28677	0.00825975	Human																FALSE
DNAJC5										0.508012	0.0330202	Macaque													FALSE
DNAJC7				0.523856	7.44122e-30	Human	0.638141	1.87036e-17	Human																FALSE
DNAJC8				0.296263	1.07273e-11	Human	0.234245	0.000252054	Human	0.499608	0.002018	Human													FALSE
DNAJC9				0.488487	2.96418e-28	Human	0.466867	1.95885e-12	Human	0.375345	0.0368028	Human				0.561311	0.000195145	Human							FALSE
DNER	0.51277	0.000913581	Macaque													0.567666	0.0117228	Human							FALSE
DNM1L				0.423455	7.50223e-05	Macaque				0.555511	0.0456066	Macaque													FALSE
DNM2	0.85112	3.58268e-15	Macaque	0.741659	1.07412e-21	Macaque				0.778829	1.15703e-10	Macaque				0.518757	0.0316278	Macaque							FALSE
DNM3				0.333556	0.0239722	Macaque																			FALSE
DNMT1	0.516104	0.0104297	Macaque																						FALSE
DNMT3A	1.04802	7.66367e-18	Macaque	0.952258	2.38147e-42	Macaque	0.790384	4.30488e-09	Macaque	1.00052	2.4555e-13	Macaque	1.4605	0.0415642	Macaque	0.92808	7.27142e-09	Macaque							FALSE
DNTTIP2							0.260899	0.00689283	Human																TRUE
DOCK3										0.677405	1.24728e-10	Macaque													FALSE
DOCK4	1.16147	5.15546e-20	Macaque	0.96917	3.61131e-55	Macaque	0.655831	1.21081e-07	Macaque	0.910754	1.02967e-13	Macaque				0.729683	5.06371e-06	Macaque							FALSE
DOCK7	1.04693	1.1566e-17	Macaque	0.680996	1.11114e-14	Macaque				0.825608	6.08766e-07	Macaque													FALSE
DOK4	0.477414	0.00814987	Macaque	0.472191	3.96243e-08	Macaque	0.731241	1.71967e-07	Macaque	0.725893	2.2432e-06	Macaque													TRUE
DOK5	0.653706	3.46744e-09	Human							0.836818	2.19472e-11	Human													FALSE
DOT1L										0.567853	5.25897e-07	Macaque													FALSE
DPCD										0.572579	0.00044738	Macaque													FALSE
DPF1	1.13143	2.78177e-23	Macaque	0.80968	1.00003e-29	Macaque				0.702817	0.000375735	Macaque				0.950968	1.47753e-07	Macaque							FALSE
DPP6	1.41396	3.05028e-32	Macaque	1.43256	2.14889e-103	Macaque	0.93082	1.10843e-14	Macaque	1.10294	1.21001e-17	Macaque	1.5151	0.0150045	Macaque	1.58162	9.4346e-28	Macaque	1.57502	0.00196891	Macaque				FALSE
DPP7				0.591269	7.47416e-18	Macaque	0.637026	1.26489e-09	Macaque	0.514945	0.000331397	Macaque													TRUE
DPP8	0.433088	0.000177959	Macaque	0.472745	4.01888e-10	Macaque				0.663564	0.00136356	Macaque				0.704853	0.00273582	Macaque							FALSE
DPYSL2	1.08201	9.42608e-35	Macaque	1.09661	4.95617e-108	Macaque	0.980578	1.21729e-24	Macaque	1.25402	3.75172e-31	Macaque				1.62649	2.21443e-50	Macaque	1.27578	0.0130345	Macaque	1.42996	0.0180066	Macaque	FALSE
DPYSL3	1.03648	2.50128e-27	Macaque	0.673616	1.11812e-36	Macaque	0.369684	0.0013434	Macaque	0.699701	4.66844e-09	Macaque				0.737605	3.19947e-09	Macaque							FALSE
DPYSL4	0.592943	2.416e-05	Macaque				0.690579	3.24401e-07	Macaque	0.710973	1.34825e-05	Macaque													FALSE
DPYSL5	0.78051	2.6957e-09	Macaque	0.831326	1.22479e-25	Macaque				0.933297	2.54163e-13	Macaque				1.15311	2.84243e-15	Macaque							FALSE
DRAXIN							0.530794	1.17582e-08	Human																FALSE
DROSHA	0.426317	0.0413905	Macaque	0.515546	4.77651e-12	Macaque				0.549174	0.000612586	Macaque													FALSE
DSCAML1	0.871504	2.09354e-13	Macaque	0.915193	1.54518e-38	Macaque	0.782512	1.50335e-08	Macaque	0.718063	1.26246e-08	Macaque													FALSE
DST	1.66178	6.39096e-51	Macaque	1.14088	1.33244e-86	Macaque	0.683494	8.44745e-07	Macaque	1.48504	4.59989e-35	Macaque	1.53362	0.000153457	Macaque							2.02307	0.00126357	Macaque	FALSE
DSTN																0.782222	6.52872e-11	Macaque							FALSE
DSTYK	0.455033	0.0232715	Macaque							0.529724	0.001157	Macaque													FALSE
DTD1	0.764677	2.07193e-05	Human	0.737924	6.26678e-45	Human	0.496289	7.13063e-10	Human	0.856395	7.21977e-10	Human				0.767452	1.22512e-08	Human	1.32054	0.00235043	Human				FALSE
DTX1	0.514499	7.86412e-05	Macaque							0.540992	0.000742019	Macaque													FALSE
DTX3				0.528889	1.42111e-07	Macaque																			FALSE
DUSP1				0.596308	3.39514e-23	Human										1.25052	2.71985e-18	Human							FALSE
DUSP11				0.40378	4.55866e-18	Human																			FALSE
DUSP4							0.412145	5.42585e-06	Human							0.675286	0.000341645	Macaque							FALSE
DUSP8	0.971648	9.50565e-18	Macaque	0.776509	2.83243e-34	Macaque				0.677853	3.54292e-08	Macaque				1.13	1.1482e-15	Macaque							FALSE
DVL3	0.60968	1.50479e-06	Macaque	0.383872	0.0218414	Macaque										0.53307	0.045264	Macaque							FALSE
DYNC1H1	0.96262	9.48698e-17	Macaque	0.805872	4.75991e-36	Macaque				0.875206	4.95989e-09	Macaque	1.45628	0.0253605	Macaque	0.543775	0.0470555	Macaque							FALSE
DYNC1I1										0.635374	9.53278e-06	Human													FALSE
DYNC1LI2	0.564466	2.79917e-05	Macaque																						FALSE
DYNLL1	0.938082	1.11175e-28	Human	0.662775	7.56547e-75	Human	0.369129	2.48127e-18	Human	1.00327	1.28942e-38	Human	1.44558	2.15747e-05	Human	0.58285	6.53566e-11	Human							FALSE
DYNLL2	1.24377	6.64693e-24	Macaque	0.97712	7.79295e-42	Macaque	0.830014	8.46489e-12	Macaque	1.13726	8.7579e-20	Macaque				1.13	8.97872e-14	Macaque	1.58657	0.0032109	Macaque				FALSE
DYNLRB1	0.483079	0.000926379	Macaque	0.507545	7.74256e-08	Macaque	0.817359	2.34827e-21	Macaque	0.607315	0.0185561	Macaque				0.640629	6.51261e-05	Macaque							FALSE
DYNLRB2	0.776884	2.75063e-11	Macaque	0.96	1.70628e-55	Macaque	1.22129	5.58803e-33	Macaque	1.09096	5.95651e-16	Macaque				0.983563	6.92302e-13	Macaque							TRUE
DYNLT1	0.525044	0.00575403	Human							0.480701	7.42664e-06	Human													FALSE
DYNLT3																0.556257	0.0020873	Human							FALSE
DYRK1A	1.14243	2.51235e-21	Macaque	0.902012	2.06635e-37	Macaque				1.0764	2.32741e-19	Macaque				1.02887	1.08186e-13	Macaque							FALSE
DZIP3	0.503145	0.0221532	Macaque	0.470951	2.58731e-06	Macaque																			TRUE
EBNA1BP2							0.22869	0.0378192	Human																FALSE
ECH1	0.65731	0.0124187	Human	0.429323	5.00505e-16	Human	0.298655	0.000370953	Human	0.748673	5.95776e-08	Human				0.678886	5.57236e-06	Human							FALSE
ECHS1	0.686128	0.0176995	Human	0.417033	6.52942e-16	Human																			FALSE
ECI2				0.673919	1.90412e-34	Human	0.533429	3.98141e-12	Human							0.640367	0.000417375	Human							FALSE
EDF1										0.416102	0.000400505	Human													FALSE
EDRF1	0.445143	0.000161379	Macaque																						FALSE
EEA1	0.624305	0.00158082	Macaque	0.644879	1.25467e-12	Macaque				0.615833	0.000229606	Macaque				0.793584	2.28039e-05	Macaque							FALSE
EEF1A1	2.07606	2.63342e-135	Human	2.23922	0	Human	2.604	0	Human	2.17069	1.93737e-141	Human	1.45086	3.11567e-09	Human	1.39557	2.23525e-108	Human	1.86621	1.11418e-20	Human	1.29025	5.35792e-05	Human	FALSE
EEF1A2	0.429765	7.03994e-05	Macaque				0.525514	8.89105e-06	Human																FALSE
EEF1B2	1.35608	1.41956e-34	Human	1.3575	2.38815e-142	Human	1.61537	6.92678e-127	Human	1.26266	4.50559e-45	Human							1.187	0.00384045	Human	1.84718	0.00585137	Human	FALSE
EEF1D	1.63654	8.92571e-32	Human	1.66487	3.55288e-174	Human	1.39538	2.63326e-78	Human	1.41744	1.47679e-34	Human	2.16561	2.53302e-05	Human	2.19901	1.00403e-58	Human	1.52127	3.87518e-05	Human				FALSE
EEF1G							3.66672	6.22851e-96	Macaque	2.95534	7.11056e-21	Macaque													FALSE
EEF2	1.2768	4.43381e-42	Human	1.32378	5.10288e-152	Human	0.963001	1.27244e-53	Human	1.58541	1.36296e-58	Human	1.25282	0.000184915	Human	2.00431	9.20526e-78	Human							FALSE
EFNA5	0.415792	0.0169498	Macaque							0.613382	0.0132019	Macaque													FALSE
EFNB2	1.27506	2.08534e-25	Macaque				0.427114	0.00140385	Human							0.951264	2.58131e-09	Macaque							FALSE
EFR3B				0.407377	1.63285e-06	Macaque																			FALSE
EFTUD2				0.470499	9.70997e-08	Macaque				0.560609	0.000121759	Macaque													FALSE
EGR1							1.6722	1.69606e-10	Macaque																FALSE
EHBP1	0.657711	4.56437e-06	Macaque																						FALSE
EHMT1	0.627372	4.15133e-07	Macaque							0.725231	4.2623e-07	Macaque													FALSE
EI24				0.378625	4.72635e-11	Human																			FALSE
EID1				0.356222	2.55268e-20	Human	0.605246	1.79823e-24	Human																TRUE
EID2	0.755345	4.9684e-13	Macaque							0.60017	7.81441e-06	Macaque				0.777963	1.62864e-07	Macaque							FALSE
EIF1										0.334656	2.04906e-05	Human													FALSE
EIF1AD				0.617522	2.38495e-21	Macaque				0.584954	5.96707e-05	Macaque													FALSE
EIF1B										0.419796	0.0232151	Human													FALSE
EIF2AK1				0.227974	9.68189e-06	Human																			TRUE
EIF2AK2	0.495087	0.0320081	Macaque																						FALSE
EIF2AK4	0.674806	1.66612e-06	Macaque																						FALSE
EIF2B3				0.466174	8.70852e-07	Macaque				0.541332	0.0211116	Macaque													FALSE
EIF2S3										0.755655	0.00430943	Macaque													FALSE
EIF3A	0.557861	0.00373428	Macaque	0.456736	1.28484e-05	Macaque				0.541557	0.00741229	Macaque													FALSE
EIF3D				0.265636	1.86294e-06	Human										0.847871	4.94604e-09	Human							FALSE
EIF3E	0.959014	5.734e-12	Human	0.972923	3.32514e-78	Human	0.431894	7.77413e-15	Human	0.897699	3.53122e-18	Human				1.366	3.61143e-35	Human							FALSE
EIF3F							0.609855	1.30851e-06	Macaque																FALSE
EIF3H				0.45492	7.86782e-25	Human										0.743772	2.90941e-10	Human							FALSE
EIF3I	0.668755	0.00507287	Human	0.746149	1.36118e-50	Human	0.440707	1.82621e-11	Human	0.697638	8.28087e-12	Human				0.882199	3.11662e-10	Human							FALSE
EIF3J	0.510874	0.000857472	Macaque	0.662396	2.40339e-13	Macaque	0.538438	0.000886938	Macaque	0.622269	0.000247952	Macaque				0.70208	0.000678388	Macaque							FALSE
EIF3K				0.408863	1.36876e-16	Macaque										1.04036	1.80368e-22	Macaque							FALSE
EIF3L	0.845345	2.79734e-14	Human	0.820708	2.38438e-55	Human	0.418897	2.39881e-10	Human	0.696436	1.55603e-11	Human				1.17538	1.18861e-25	Human							TRUE
EIF4A1	1.12807	2.86348e-31	Human	1.12293	3.42456e-135	Human				0.539631	5.39631e-12	Human	2.62372	2.69106e-07	Human	1.88045	2.65626e-46	Human	0.859088	0.00503006	Human				FALSE
EIF4A2	0.626991	1.072e-12	Human	0.319927	8.73465e-13	Human	0.297251	3.93824e-08	Human	0.43416	1.25795e-08	Human	1.23354	0.00467859	Human										FALSE
EIF4B				0.299796	3.76983e-10	Human	0.554006	1.56567e-13	Human							0.435476	0.0215985	Human							TRUE
EIF4E							0.261086	0.000379289	Human	0.642067	0.00123225	Human													FALSE
EIF4EBP1										0.553158	0.0255937	Human													FALSE
EIF4G2	0.562679	1.01391e-15	Macaque	0.866303	3.13453e-98	Macaque	0.870362	1.8949e-43	Macaque	0.604466	2.01472e-08	Macaque				0.498674	6.2116e-06	Macaque							FALSE
EIF4G3	0.918776	5.01013e-12	Macaque	0.684938	2.16767e-19	Macaque				0.727436	1.82467e-08	Macaque				0.729006	5.3518e-05	Macaque							FALSE
EIF5	0.48897	0.000103408	Macaque	0.566745	1.21771e-25	Macaque	0.359542	0.0386538	Macaque	0.541408	9.69083e-05	Macaque				0.782077	7.62013e-13	Macaque							FALSE
EIF5B										0.648876	0.0327487	Macaque													FALSE
ELAVL1	0.409099	0.00592153	Macaque																						FALSE
ELAVL3	1.35005	2.22474e-43	Macaque	1.05828	2.01899e-104	Macaque	0.710662	1.13115e-17	Macaque	1.17788	1.93594e-30	Macaque	1.64768	1.19358e-05	Macaque	1.25094	1.77465e-33	Macaque	0.990884	0.000440869	Macaque				FALSE
ELAVL4	0.96057	3.14905e-14	Macaque	0.373266	0.00224344	Macaque	0.64131	9.57336e-07	Macaque																FALSE
ELF2	0.61196	2.86827e-06	Macaque	0.416997	0.0207022	Macaque										0.605056	0.0315278	Macaque							TRUE
ELFN1	0.815558	3.07712e-08	Macaque	0.361385	0.016571	Macaque				1.0026	8.18523e-13	Macaque													FALSE
ELMO1				0.641926	4.57642e-12	Macaque										1.04788	4.63204e-12	Macaque							TRUE
ELOVL6	0.614333	1.40512e-06	Macaque	0.562794	8.17901e-10	Macaque				0.663403	0.000123364	Macaque				0.64869	0.0266279	Macaque							FALSE
EMC1	0.46022	0.00133847	Macaque	0.48946	3.41712e-13	Macaque				0.84587	1.89011e-12	Macaque				0.530005	0.00557953	Macaque							FALSE
EMC3				0.229901	0.00465917	Human																			FALSE
EMC4	1.08863	8.89643e-15	Human	1.1535	8.98417e-95	Human	1.17277	1.00047e-44	Human	1.00107	6.69567e-14	Human	1.54571	0.0415642	Human	1.06253	1.34099e-13	Human	1.15216	0.0308695	Human				TRUE
EMC6	0.784251	6.03583e-10	Human	0.806171	9.96795e-64	Human				0.619114	1.86698e-08	Human				0.914384	7.67894e-13	Human							FALSE
EMC7							0.248756	0.0299401	Human																FALSE
EML4	0.517463	7.87498e-05	Macaque																						FALSE
EML6	1.13335	4.70667e-20	Macaque	1.204	9.27322e-76	Macaque				0.933211	2.06792e-15	Macaque	2.13168	1.27532e-05	Macaque	1.43115	1.49165e-23	Macaque	1.7567	0.000820488	Macaque				FALSE
ENAH	0.822634	1.45454e-10	Macaque	0.792576	1.15948e-25	Macaque				0.802521	2.26611e-07	Macaque													FALSE
ENC1																0.823567	1.82776e-07	Macaque							FALSE
ENHO	0.887985	1.27661e-12	Macaque													0.752806	5.3478e-05	Macaque							FALSE
ENO2							0.691918	3.30456e-18	Human																FALSE
ENOX1	0.633796	1.0481e-06	Macaque	0.679846	4.39292e-19	Macaque	0.499987	0.0232674	Macaque	0.773638	1.17859e-06	Macaque				0.877294	4.28735e-09	Macaque							FALSE
ENSA	0.521243	0.00144155	Macaque	0.580719	2.1249e-12	Macaque	0.726945	7.85072e-07	Macaque	0.726559	0.00130429	Macaque													FALSE
ENTPD4	0.387583	0.0187054	Macaque							0.556607	9.16429e-05	Macaque													TRUE
EP300	1.3176	8.92087e-29	Macaque	1.17295	2.85424e-63	Macaque				1.12454	2.43216e-18	Macaque				1.50955	1.46705e-24	Macaque							FALSE
EP400	0.742749	1.09152e-07	Macaque	0.6218	1.33915e-16	Macaque				0.598697	2.35245e-05	Macaque													FALSE
EPB41L1	0.750942	4.64606e-09	Macaque	0.544348	1.10947e-21	Macaque				0.675194	4.03397e-07	Macaque				0.654746	5.73854e-06	Macaque							FALSE
EPC1	0.891601	1.10481e-18	Macaque	0.560423	1.00625e-11	Macaque				0.558734	0.0362098	Macaque				0.694504	5.82587e-06	Macaque							FALSE
EPC2	1.05763	3.63063e-20	Macaque	0.768486	2.90121e-21	Macaque				0.671741	1.02477e-07	Macaque													FALSE
EPG5	0.584072	0.000151313	Macaque							0.65121	5.39835e-09	Macaque													FALSE
EPHA5	0.714039	3.69881e-08	Macaque	0.503931	3.83814e-07	Macaque																			FALSE
EPHB6										0.880907	2.02588e-08	Macaque													FALSE
EPM2AIP1	1.07765	1.56187e-18	Macaque	0.640619	1.05517e-12	Macaque				0.632227	0.000764643	Macaque													FALSE
EPN1	0.548033	0.000115952	Macaque	0.657208	3.39621e-14	Macaque	0.56305	0.00501896	Macaque																FALSE
EPN2				0.415746	3.08054e-16	Human	0.305901	0.000578264	Human																TRUE
EPS15	0.476715	0.000139914	Macaque	0.584335	8.04169e-12	Macaque	0.590735	0.000359157	Macaque	0.613071	0.00208706	Macaque													FALSE
ERBB4	1.72018	1.56999e-50	Macaque	1.51146	2.2562e-154	Macaque	0.878785	1.36823e-11	Macaque	1.49611	7.70511e-26	Macaque	1.82574	0.000388225	Macaque	2.16266	1.03579e-65	Macaque				1.51505	0.0188784	Macaque	FALSE
ERC1	0.457868	0.0267091	Macaque																						FALSE
ERC2	0.564158	7.79195e-06	Macaque	0.669477	4.8568e-22	Macaque				0.710543	3.60095e-07	Macaque													FALSE
ERCC3				0.368214	0.00113808	Macaque				0.557981	0.00107907	Macaque													FALSE
ERCC6	0.815889	5.54406e-13	Macaque	0.754352	4.41231e-40	Macaque				0.709677	1.03256e-10	Macaque				0.957651	9.64143e-10	Macaque							FALSE
ERGIC2	0.533779	0.00706783	Macaque																						FALSE
ERH	1.22117	3.03782e-36	Human	0.700658	9.23451e-54	Human	0.502711	4.36167e-15	Human	0.803479	5.16572e-17	Human	1.79821	3.97136e-08	Human	0.918702	2.79818e-15	Human							FALSE
ERP29	0.999041	2.04714e-09	Human	0.798718	1.5687e-50	Human	1.07146	4.1166e-42	Human	0.722041	1.21218e-06	Human				0.623566	0.000143043	Human	1.03308	0.0237132	Human				TRUE
ERV3-1	0.682617	7.68136e-09	Human	0.904578	3.55426e-65	Human	0.639462	9.0203e-22	Human	0.726742	2.79305e-11	Human				1.14969	5.64086e-19	Human							FALSE
ESD				0.46021	7.3394e-21	Human				0.761328	9.13255e-13	Human				0.88655	2.20179e-10	Human							TRUE
ETFB	0.86661	0.00017341	Human	0.627881	6.27539e-37	Human	0.834158	1.00977e-29	Human	1.00053	2.55815e-15	Human							1.58869	1.0019e-05	Human				FALSE
ETNK1	1.13839	2.59643e-19	Macaque	1.3617	1.17627e-84	Macaque	1.12832	1.65381e-27	Macaque	1.32825	9.8279e-28	Macaque				1.63837	2.42442e-29	Macaque							FALSE
ETS1	0.755384	5.22608e-10	Macaque																						FALSE
EVC				0.786196	4.50186e-43	Macaque										0.966475	1.18502e-13	Macaque							FALSE
EWSR1	0.398352	0.0336531	Macaque	0.621284	6.85136e-19	Macaque	0.573392	0.0297204	Macaque	0.760296	6.72663e-08	Macaque													FALSE
EXOC3	0.683837	4.43445e-09	Macaque	0.39761	2.07419e-05	Macaque				0.577962	1.39681e-05	Macaque													FALSE
EXOC6							0.404725	3.31304e-07	Human																FALSE
EXOC6B										0.43938	0.0432125	Macaque													FALSE
EXOSC6							0.401482	1.16856e-08	Human																FALSE
EXT2	0.778562	4.07639e-10	Macaque	0.632469	4.86449e-20	Macaque	0.737874	1.12192e-12	Macaque	0.75704	3.45423e-06	Macaque				0.609647	0.049752	Macaque							FALSE
EXTL2	0.46732	0.00200398	Macaque							0.583871	0.0361395	Macaque													FALSE
EXTL3	0.513223	8.29588e-05	Macaque																						FALSE
EYA3																0.649549	0.00079612	Macaque							FALSE
EZH2	0.518441	4.66546e-05	Macaque																						FALSE
EZR				0.647305	4.44387e-35	Human	0.388465	7.84466e-10	Human							0.881104	1.15531e-07	Human							TRUE
F2R																0.473663	0.0295219	Human							FALSE
FABP5	1.33614	2.52209e-29	Human	0.797168	5.07073e-66	Human	1.04766	6.62314e-55	Human	1.38518	9.34688e-39	Human							0.747977	0.00450494	Human	2.14729	0.003842	Human	FALSE
FABP7	1.97323	2.22075e-60	Human	1.14666	1.8432e-102	Human	1.35184	1.00189e-75	Human	1.29461	3.33241e-50	Human	3.11322	6.4712e-09	Human				1.34909	1.85014e-05	Human	3.05029	0.000444244	Human	FALSE
FADS1										0.528247	0.0011496	Macaque				0.552694	0.0112879	Human							TRUE
FAF2	0.652244	2.44142e-06	Macaque	0.613026	3.40608e-12	Macaque										0.879592	9.61389e-08	Macaque							FALSE
FAHD1				0.242709	0.000368385	Human																			TRUE
FAIM				0.401465	5.84585e-07	Macaque				0.466586	0.0146107	Macaque													TRUE
FAM104A				0.481788	1.39065e-22	Human										0.620524	0.000146348	Human							FALSE
FAM107B	1.874	1.63136e-51	Macaque	1.19499	3.24636e-75	Macaque	0.89317	1.92971e-14	Macaque	1.00794	5.00271e-16	Macaque	1.7121	0.00404283	Macaque	1.62815	4.04804e-33	Macaque							FALSE
FAM110A				0.576924	1.28241e-11	Macaque	0.587788	0.00173926	Macaque	0.632096	0.00360305	Macaque													FALSE
FAM110B	0.685378	3.2164e-05	Macaque																						FALSE
FAM117B	0.541018	0.000161273	Macaque	0.411275	5.33398e-05	Macaque				0.651748	4.26525e-06	Macaque													FALSE
FAM120AOS	0.643163	4.34873e-06	Macaque	0.712203	3.20177e-20	Macaque	0.535548	0.000764128	Macaque	0.44533	0.0245933	Macaque				0.735508	9.62387e-05	Macaque							TRUE
FAM133B							0.556395	3.13363e-12	Human																FALSE
FAM136A				0.306011	1.5512e-07	Human	0.386457	0.000257747	Human																FALSE
FAM13B	0.840083	2.55344e-12	Macaque	0.484307	2.84834e-09	Macaque				0.557019	0.00188676	Macaque													FALSE
FAM168A	0.739413	8.96275e-10	Macaque	0.715498	9.93337e-24	Macaque				0.834093	4.4359e-13	Macaque				1.19943	2.26546e-17	Macaque							FALSE
FAM168B	0.832851	6.30426e-12	Macaque	0.446527	2.27051e-06	Macaque										0.708048	4.43853e-06	Macaque							FALSE
FAM171A2	1.01123	6.20142e-17	Macaque	0.649204	1.31753e-14	Macaque				1.01788	1.34161e-18	Macaque	1.63739	0.0415642	Macaque	0.919049	1.20843e-08	Macaque							FALSE
FAM171B	0.472191	0.00391428	Macaque	0.483213	3.46307e-07	Macaque				0.542081	0.000200755	Macaque													FALSE
FAM184A	0.702188	6.66118e-09	Macaque	0.431512	0.0271945	Macaque				0.554399	0.000580941	Macaque													FALSE
FAM193A	0.809402	1.51065e-08	Macaque	0.709463	2.18218e-19	Macaque				0.799589	1.09078e-10	Macaque													FALSE
FAM200B							0.335515	7.68614e-06	Human																TRUE
FAM204A				0.420711	3.04185e-05	Macaque										0.764157	0.000425013	Macaque							FALSE
FAM210A							0.304814	0.00118567	Human																FALSE
FAM214A	0.65958	4.88488e-06	Macaque	0.520272	7.07627e-16	Macaque	0.595367	0.000443432	Macaque	0.722625	1.20031e-05	Macaque													TRUE
FAM217B							0.432723	2.29235e-07	Human																TRUE
FAM222A	0.630943	2.13288e-07	Macaque	0.582125	1.19144e-12	Macaque										0.818538	1.84582e-09	Macaque							FALSE
FAM222B	0.616169	7.80801e-05	Macaque	0.639434	1.27312e-17	Macaque				0.676358	5.79363e-06	Macaque				0.723648	0.000166831	Macaque							FALSE
FAM228B				0.393639	2.99917e-18	Human	0.477907	4.70777e-09	Human																FALSE
FAM229B	0.905564	2.2376e-09	Human	0.761013	1.39803e-48	Human	1.04535	4.75255e-43	Human	1.15586	1.34383e-23	Human													TRUE
FANCF																0.548414	0.00851784	Human							FALSE
FANCM	1.01503	1.85872e-19	Macaque	0.793003	6.18901e-38	Macaque	0.748877	1.60369e-16	Macaque	0.721917	3.83601e-11	Macaque				0.608214	0.00131323	Macaque							TRUE
FARP1	1.13928	2.14904e-20	Macaque	0.532351	1.02113e-09	Macaque				0.663682	1.00703e-05	Macaque	1.90451	0.000368241	Macaque										FALSE
FASN										0.474536	0.00925333	Macaque													FALSE
FAT3	0.984138	5.94655e-08	Macaque	0.878032	1.04568e-28	Macaque				0.79898	1.05923e-06	Macaque													FALSE
FAU	0.762929	4.1722e-39	Human	0.705875	2.37516e-139	Human	0.285328	6.69673e-22	Human	0.696982	4.73032e-38	Human							0.677308	0.000766506	Human	1.43188	2.18622e-05	Human	FALSE
FAXC	0.701465	7.03924e-10	Macaque	0.388225	0.0303861	Macaque				0.672434	0.000225046	Macaque													FALSE
FBLIM1	0.555804	3.32367e-05	Macaque	0.516866	3.11964e-12	Macaque				0.617566	1.64852e-05	Macaque				0.785976	1.00659e-08	Macaque							TRUE
FBLN1				0.559905	2.61383e-28	Human	0.442085	2.46746e-08	Human	0.544178	0.00363037	Human				0.675605	1.5306e-05	Human							TRUE
FBN3										0.415544	6.18455e-05	Macaque													FALSE
FBRSL1										0.437086	0.0291612	Macaque													FALSE
FBXL20	0.633807	5.56139e-06	Macaque	0.594004	3.34184e-11	Macaque				0.708306	3.50572e-07	Macaque				0.839827	0.000368867	Macaque							FALSE
FBXO42										0.420007	0.0258939	Macaque													TRUE
FBXO45										0.427098	0.0296326	Macaque													FALSE
FBXW11	0.637234	5.67795e-05	Macaque	0.972458	1.65949e-39	Macaque	0.587929	0.00230785	Macaque	0.662478	3.47517e-06	Macaque				1.21084	1.86961e-17	Macaque							FALSE
FBXW2	0.452333	0.00768896	Macaque																						FALSE
FBXW5	0.566982	1.4841e-05	Macaque																						FALSE
FCHO2	0.39337	0.0331175	Macaque																						FALSE
FCHSD2	0.499017	0.000384168	Macaque																						FALSE
FDFT1				0.274713	2.85376e-06	Human																			FALSE
FDPS	0.647725	0.00293098	Human	0.74863	4.47722e-43	Human	0.745725	2.87035e-27	Human	0.409902	0.00930349	Human				0.776948	1.43959e-07	Human							FALSE
FEM1B	0.765213	4.64295e-10	Macaque	0.656143	5.3719e-18	Macaque	0.498578	0.0211741	Macaque	0.933271	6.64142e-13	Macaque				0.828497	1.1788e-06	Macaque							FALSE
FERMT2	0.572665	4.23981e-05	Macaque																						FALSE
FEZ1							0.342505	0.000300837	Macaque							0.465704	7.86963e-05	Human							FALSE
FEZ2	0.572514	0.000538912	Human	0.483622	1.02752e-21	Human				0.535499	0.00262363	Human				0.570816	0.00186071	Human							FALSE
FGD3				0.658643	6.27024e-34	Human	0.271122	0.000440005	Human	0.767911	5.57007e-07	Human				0.67037	6.61006e-05	Human							FALSE
FGF14	0.717969	8.1127e-07	Macaque							0.813914	5.01369e-10	Macaque													FALSE
FGFR1OP2				0.247227	9.76848e-08	Human	0.285239	0.000261012	Human																FALSE
FIBP							0.287739	0.0141462	Human																TRUE
FIGN				0.472626	1.00289e-07	Macaque				0.55477	0.000447458	Macaque													FALSE
FJX1	0.700756	1.76926e-08	Macaque	0.348471	3.8512e-13	Human	0.521005	7.60116e-06	Human																FALSE
FKBP1A	0.679398	9.65486e-05	Human	0.476129	1.54286e-26	Human							1.75272	0.0302888	Human	0.740893	4.54253e-06	Human							FALSE
FKBP1B				0.467506	1.71512e-23	Human				0.598793	0.000116645	Human													FALSE
FKBP2	0.644738	1.52622e-06	Human	0.552205	1.69688e-34	Human	0.274245	9.91905e-07	Human	0.54909	1.14097e-05	Human				0.836954	9.07933e-11	Human							FALSE
FKBP7	0.775188	5.24765e-09	Macaque	0.623086	1.30473e-16	Macaque				0.811069	3.5544e-08	Macaque													TRUE
FLAD1				0.433725	8.15745e-05	Macaque																			FALSE
FLOT1				0.526965	1.88359e-23	Human																			FALSE
FLRT2	0.607141	0.00133817	Macaque	0.849831	1.17769e-28	Macaque				1.31287	1.22317e-19	Macaque				1.18116	2.17626e-14	Macaque							FALSE
FLYWCH2																0.655793	0.0162742	Macaque							FALSE
FMNL2	0.804208	2.11247e-12	Macaque																						FALSE
FMR1	0.798865	7.22998e-09	Macaque	0.603982	2.84488e-12	Macaque	0.67416	3.39346e-07	Macaque	0.613276	0.00011991	Macaque				0.551778	0.00288159	Macaque							FALSE
FNBP1	1.31678	1.14393e-26	Macaque	1.20038	1.81508e-64	Macaque				1.00216	1.38196e-11	Macaque				1.23749	2.02249e-14	Macaque							FALSE
FNBP1L	0.867849	2.2843e-17	Macaque	0.335101	8.78098e-06	Macaque				0.78535	5.23393e-10	Macaque													TRUE
FNBP4	0.83223	2.37578e-10	Macaque	0.499774	2.01402e-05	Macaque				0.81797	1.94781e-09	Macaque	1.28251	0.0307597	Macaque	0.678081	0.00411738	Macaque							FALSE
FNDC3A	1.02482	1.26152e-15	Macaque	0.721906	3.15228e-23	Macaque				0.795182	1.37401e-08	Macaque				1.01499	2.4e-10	Macaque							FALSE
FNIP2	0.50589	0.00060089	Macaque	0.443373	1.67106e-05	Macaque																			FALSE
FOS													1.13144	0.00497556	Human	1.43071	2.14251e-17	Human							FALSE
FOXG1	2.39818	6.46682e-68	Macaque	2.45673	8.96403e-271	Macaque	1.44401	1.18373e-42	Macaque	2.12275	1.56297e-38	Macaque	2.91204	2.30063e-14	Macaque	3.03121	1.2127e-112	Macaque	1.47433	0.00266045	Macaque	2.71088	0.000162527	Macaque	FALSE
FOXJ3	0.865446	2.04147e-12	Macaque	0.910214	8.37592e-28	Macaque	0.534329	0.00249186	Macaque	0.96117	4.92281e-12	Macaque				1.11943	5.20494e-16	Macaque							FALSE
FOXN3	0.960271	2.77124e-15	Macaque	0.505361	1.99829e-09	Macaque				0.953754	2.46454e-12	Macaque													FALSE
FOXO3										0.537104	0.000944466	Macaque													FALSE
FOXRED1	0.397609	0.019858	Macaque	0.498331	7.77645e-11	Macaque				0.571592	0.000234131	Macaque													TRUE
FRA10AC1	0.527033	0.000153553	Macaque	0.558102	1.33976e-11	Macaque	0.799049	1.88466e-11	Macaque																FALSE
FRAT1							0.306821	0.00377489	Human																FALSE
FRG1	0.884657	4.71063e-09	Human	0.779961	1.28231e-46	Human	0.45943	2.80132e-12	Human	0.763836	9.8015e-10	Human				0.804455	6.63869e-07	Human							FALSE
FRMD3										0.558284	0.0191649	Macaque													FALSE
FRMD5	0.850659	3.07031e-12	Macaque	0.896476	8.23929e-46	Macaque				0.707297	1.15274e-07	Macaque				0.60003	0.000483637	Macaque							TRUE
FRYL	0.777499	1.37182e-10	Macaque	0.66114	9.83116e-15	Macaque				0.715077	4.78378e-06	Macaque													FALSE
FSCN1							0.782113	6.62574e-14	Macaque																FALSE
FTH1	3.52636	5.683e-173	Human	2.73281	0	Human	2.45052	6.48208e-140	Human	3.35658	7.44583e-171	Human	3.57045	7.68064e-19	Human	2.08297	2.89901e-131	Human	2.39185	7.27335e-24	Human	2.77962	4.38044e-10	Human	TRUE
FTL	2.04188	5.627e-126	Human	2.12949	0	Human	1.69824	1.21731e-224	Human	2.09842	3.2824e-124	Human	2.01463	5.66744e-14	Human	1.25709	9.17959e-69	Human	1.24751	1.15968e-10	Human	1.96779	4.29934e-08	Human	FALSE
FTO	1.10395	2.18838e-18	Macaque	1.08705	1.0605e-60	Macaque	0.920013	4.94937e-15	Macaque	0.944909	1.37069e-12	Macaque				0.845592	2.24726e-07	Macaque							FALSE
FUBP1	0.802215	4.21978e-14	Macaque	0.805908	1.52805e-36	Macaque				0.741408	5.04153e-08	Macaque													FALSE
FUBP3	0.517998	0.000108271	Macaque	0.273583	0.036794	Macaque																			FALSE
FUNDC2				0.311344	8.56565e-15	Human	0.346106	0.00063368	Human																FALSE
FUOM	0.746316	3.47275e-11	Macaque	0.745931	8.02697e-36	Macaque				0.841715	4.30042e-11	Macaque				1.28181	2.17822e-19	Macaque							FALSE
FUS	0.767151	6.67581e-17	Macaque	0.565401	6.92647e-31	Macaque	0.443443	0.000720774	Macaque	0.744809	1.4743e-13	Macaque													FALSE
FUT8				0.34629	0.00208103	Macaque																			FALSE
FUT9	1.02969	3.19779e-17	Macaque	0.651934	9.30162e-16	Macaque				0.791695	9.41877e-08	Macaque													FALSE
FXR1	0.766747	2.82042e-08	Macaque							0.710088	5.20733e-07	Macaque				0.604346	0.00281145	Macaque							FALSE
FXR2	0.610366	1.76647e-06	Macaque	0.358774	0.000384026	Macaque				0.502076	0.00127542	Macaque				0.523919	0.00152729	Macaque							FALSE
FXYD6				0.508429	1.36305e-26	Human										0.735001	5.4333e-13	Human							FALSE
FYN	1.23109	1.25666e-24	Macaque	0.721898	2.79719e-24	Macaque				0.907797	7.85328e-13	Macaque				0.912186	4.59754e-09	Macaque							FALSE
FZD3	0.457367	0.0402173	Macaque	0.429585	0.00203184	Macaque				0.870918	5.68368e-11	Macaque				0.678312	0.0278478	Macaque							FALSE
G3BP1	1.2446	2.06575e-24	Macaque	0.986988	3.86455e-37	Macaque	0.79706	8.37913e-10	Macaque	0.958404	3.42069e-13	Macaque				0.797119	2.11239e-05	Macaque							FALSE
GABARAP	2.17354	3.93291e-75	Macaque	2.65014	0	Macaque	3.23263	2.11062e-201	Macaque	2.25367	4.00627e-61	Macaque	1.83574	0.00117042	Macaque	2.86645	2.30609e-98	Macaque	3.23829	2.78811e-16	Macaque	2.32021	7.49559e-05	Macaque	FALSE
GABARAPL1	0.609874	3.06542e-07	Macaque	0.440253	1.28736e-07	Macaque	0.549683	0.00426987	Macaque	0.64674	1.78589e-05	Macaque				0.581303	0.0260405	Macaque							FALSE
GABARAPL2							0.455469	1.43515e-06	Macaque																FALSE
GABBR1	0.74321	2.79552e-09	Macaque	0.864983	1.93485e-34	Macaque				0.898104	7.19799e-10	Macaque				1.1484	4.41396e-14	Macaque							FALSE
GABBR2										1.04289	7.54901e-10	Macaque													FALSE
GABRA2	0.923836	6.76291e-12	Macaque	0.561126	2.98057e-09	Macaque										1.03057	4.62043e-11	Macaque							FALSE
GABRB2										0.555639	0.00142287	Macaque													FALSE
GABRB3	0.668123	2.39939e-05	Macaque	0.594235	1.62935e-12	Macaque				1.06158	1.06557e-13	Macaque				0.735732	0.00413736	Macaque							FALSE
GABRG2										0.526193	0.0468404	Macaque													FALSE
GAD1	0.646396	1.55989e-05	Macaque																						FALSE
GAD2	0.999913	7.93602e-23	Macaque	0.673739	4.91803e-38	Macaque	1.10455	1.34212e-37	Macaque	0.816247	3.87492e-10	Macaque													FALSE
GADD45A	0.480914	0.00405608	Macaque																						TRUE
GADD45G	0.785441	2.39237e-05	Macaque				0.875581	0.000652495	Macaque	0.549114	0.000121234	Human													FALSE
GADD45GIP1	0.898894	4.91936e-09	Human				0.274886	4.26642e-05	Human	0.79001	9.66099e-13	Human													FALSE
GALNT1	0.798444	8.59475e-11	Macaque	0.542809	4.56361e-10	Macaque				0.57481	0.000688433	Macaque				0.921717	1.11731e-08	Macaque							FALSE
GALNT11	0.529932	0.000426727	Macaque	0.798709	1.65848e-31	Macaque				0.54871	0.00846663	Macaque				0.784499	3.96142e-05	Macaque							FALSE
GANAB	0.478416	2.57828e-05	Macaque							0.458888	0.000605041	Macaque													FALSE
GAP43	1.54122	6.42303e-32	Human	1.26034	1.68371e-140	Human	0.663276	2.16187e-29	Human	1.62932	3.31144e-42	Human	1.78652	0.020916	Human	1.80784	1.41709e-39	Human							FALSE
GAPDH	1.0433	3.69768e-51	Human	0.942776	1.78946e-162	Human	0.67682	3.9343e-47	Human	0.954457	2.23181e-41	Human	1.25245	2.84127e-05	Human	0.615154	2.09619e-15	Human				1.41062	0.0144636	Human	FALSE
GAPVD1	0.569292	1.43267e-05	Macaque	0.410336	0.000254871	Macaque				0.611703	0.000111855	Macaque													FALSE
GATAD2B	1.73513	6.48669e-49	Macaque	1.83417	1.46166e-154	Macaque	1.18471	5.46735e-25	Macaque	2.02886	4.72217e-53	Macaque	1.72703	0.000555854	Macaque	2.0281	8.5672e-49	Macaque	1.79817	4.96736e-07	Macaque				FALSE
GCSH	1.09694	9.25208e-17	Human	0.897346	8.22922e-67	Human	0.614757	2.64651e-17	Human	0.952104	1.14627e-17	Human				0.870566	9.17859e-13	Human	1.26895	0.0325825	Human				FALSE
GDAP1							0.2237	0.00810125	Human																FALSE
GDAP1L1				0.417823	0.0130107	Macaque	0.732991	1.0022e-10	Macaque																FALSE
GDAP2	0.809636	1.21399e-11	Macaque	0.643336	1.37693e-17	Macaque	0.641349	2.58357e-08	Macaque	0.615218	8.18855e-05	Macaque				0.508403	0.0106821	Macaque							TRUE
GDI1	0.526559	1.20239e-06	Macaque	0.562822	1.19115e-16	Macaque	0.928366	4.28801e-17	Macaque																FALSE
GFPT1	0.84392	1.70231e-13	Macaque	0.650205	1.65504e-14	Macaque				0.650356	7.90156e-07	Macaque													FALSE
GGA1				0.263337	5.50932e-06	Human	0.339351	7.725e-06	Human							0.692212	1.4847e-06	Human							FALSE
GGA2	0.479464	0.000648414	Macaque																						FALSE
GGA3	0.391392	0.00925789	Macaque	0.619127	1.58899e-23	Macaque				0.618629	7.853e-06	Macaque													TRUE
GGH	0.759694	2.26835e-07	Macaque	0.586681	2.98434e-12	Macaque	0.809545	3.21342e-11	Macaque							0.598532	0.00727187	Macaque							FALSE
GGT1	0.695772	4.26588e-12	Macaque	0.946643	4.10443e-60	Macaque	0.833485	7.46849e-24	Macaque	0.616294	2.23869e-10	Macaque				0.751358	7.00277e-08	Macaque							FALSE
GIGYF1	0.83016	5.1758e-13	Macaque	0.624495	1.1354e-17	Macaque				0.493217	0.000215249	Macaque				0.621415	3.80057e-05	Macaque							FALSE
GIGYF2	0.812374	2.17233e-09	Macaque	0.476611	0.00269306	Macaque				0.773185	6.24683e-05	Macaque													FALSE
GIT1	0.504828	0.00104817	Macaque	0.459608	3.59463e-07	Macaque										0.543126	0.00646093	Macaque							FALSE
GJC1	0.561031	0.00111704	Macaque																						FALSE
GKAP1	0.6639	7.75223e-11	Macaque													0.63838	0.00372285	Macaque							FALSE
GLCCI1	0.837397	4.0239e-13	Macaque	0.522597	0.000117665	Macaque				0.724092	4.3475e-05	Macaque													FALSE
GLG1	1.11403	3.12138e-20	Macaque	0.941163	1.95012e-38	Macaque				1.0634	1.33389e-14	Macaque				0.802738	4.39927e-06	Macaque							FALSE
GLOD4							0.347817	0.000253847	Human																TRUE
GLRX				0.473271	2.14677e-05	Macaque																			FALSE
GLRX5	0.486372	0.000100738	Macaque																						FALSE
GLS	0.497681	4.23303e-06	Macaque							0.417348	0.0356469	Macaque													FALSE
GLUL				0.576544	3.14885e-33	Human										0.550039	0.00443979	Human							FALSE
GLYR1										0.528956	0.0310339	Macaque													FALSE
GMFB				0.512275	6.37083e-07	Macaque				0.551104	0.00198134	Macaque													FALSE
GMPR2	0.528874	2.00559e-07	Macaque	0.367389	0.00144224	Macaque																			FALSE
GMPS	0.580164	2.05228e-06	Macaque	0.509174	2.14914e-07	Macaque				0.758013	1.57583e-07	Macaque				0.773826	6.76786e-06	Macaque							FALSE
GNA11	0.524024	5.64485e-05	Macaque							0.716425	3.46177e-09	Macaque													FALSE
GNA12	0.529355	1.45609e-05	Macaque																						TRUE
GNA13	0.479473	0.000484714	Macaque	0.51199	1.02749e-10	Macaque				0.592504	1.72806e-05	Macaque				0.790695	2.54149e-06	Macaque							FALSE
GNAI2	1.58407	7.20691e-39	Macaque	0.656959	2.25158e-22	Macaque				0.766656	1.98929e-09	Macaque	1.8177	0.000108372	Macaque	1.64835	2.70297e-30	Macaque							FALSE
GNAI3																0.5245	0.00672301	Human							FALSE
GNAO1	1.63457	5.83606e-39	Macaque	1.44388	8.36153e-105	Macaque	1.13881	7.64593e-28	Macaque	1.51992	2.08326e-33	Macaque	1.41872	0.00303315	Macaque	1.7134	2.35498e-34	Macaque				1.83236	0.00070765	Macaque	FALSE
GNAQ	1.16392	8.17046e-24	Macaque	1.0905	4.75361e-57	Macaque	0.649682	1.70127e-05	Macaque	1.20718	1.4302e-22	Macaque				1.51051	3.86961e-26	Macaque							FALSE
GNB1	1.32986	1.78169e-29	Macaque	0.678212	4.3028e-21	Macaque				0.741957	2.05868e-05	Macaque	1.37498	0.0052013	Macaque	1.06331	6.70179e-12	Macaque							FALSE
GNB2	0.558591	6.38873e-06	Macaque				0.919238	2.32683e-16	Macaque																FALSE
GNG2	1.10864	1.08504e-26	Macaque	1.48704	1.59986e-117	Macaque	1.42777	2.76181e-53	Macaque	1.41079	4.1251e-36	Macaque				1.71084	3.70405e-34	Macaque							FALSE
GNG3	0.812524	1.1655e-06	Human	0.409158	3.15681e-18	Human	0.273988	2.45213e-06	Human	0.353411	0.0181345	Human													FALSE
GNG4	0.538413	0.000445866	Macaque	0.514511	4.24197e-07	Macaque																			FALSE
GNG5																0.499129	0.0146677	Human							FALSE
GNL1	0.482603	0.00153836	Macaque	0.450233	1.11537e-05	Macaque				0.465591	0.0338883	Macaque													FALSE
GNPTAB	1.25204	1.61399e-24	Macaque	0.965816	2.52557e-36	Macaque	0.60586	0.00351862	Macaque	0.991864	2.52865e-14	Macaque				1.18666	4.02468e-16	Macaque							TRUE
GOLGA2	0.569447	5.74682e-05	Macaque	0.477266	0.000393664	Macaque																			TRUE
GOLGA3	0.682707	2.76484e-08	Macaque							0.644234	2.1305e-07	Macaque													FALSE
GOLGA4	0.867028	9.39874e-12	Macaque	0.536454	7.05654e-13	Macaque				0.915092	2.58051e-12	Macaque													FALSE
GOLGA7	0.669426	2.42886e-06	Human	0.883313	2.3083e-68	Human				0.478157	5.3345e-07	Human				1.48102	9.63773e-28	Human							FALSE
GOLGB1							0.383135	1.33373e-06	Human																FALSE
GOLM1	0.552723	2.1895e-05	Macaque																						FALSE
GOSR1				0.279384	1.14841e-09	Human	0.391055	4.2585e-07	Human																FALSE
GPALPP1	0.629551	4.52241e-07	Macaque							0.527307	0.00500458	Macaque													FALSE
GPANK1										0.565563	0.00078781	Macaque													FALSE
GPATCH2L	0.442252	0.0436595	Macaque							0.750237	0.000112163	Macaque													FALSE
GPATCH8	0.625223	3.53967e-05	Macaque	0.601377	1.79908e-11	Macaque				0.578259	0.00369673	Macaque													FALSE
GPC1	0.470634	0.023319	Macaque																						FALSE
GPC2																0.584666	0.0212883	Human							FALSE
GPCPD1										0.535774	0.00872647	Macaque													TRUE
GPHN	0.408037	0.0338519	Macaque																						FALSE
GPI	0.79206	1.80653e-12	Macaque	0.875119	8.19279e-36	Macaque	0.630218	0.00110353	Macaque	0.728998	1.32152e-06	Macaque				0.98555	2.4491e-10	Macaque							FALSE
GPM6A	0.764179	1.80599e-21	Macaque	1.06096	2.96708e-146	Macaque	0.30529	0.0166379	Macaque	0.582279	1.1419e-10	Macaque	1.15655	0.00564649	Macaque	1.47515	4.40577e-60	Macaque							FALSE
GPR137C	0.550349	1.17726e-05	Macaque																						FALSE
GPR153																0.628113	0.0171305	Macaque							FALSE
GPR161	0.669883	7.20934e-07	Macaque																						FALSE
GPR27	0.600568	4.21193e-08	Macaque	0.536313	2.85771e-12	Macaque				0.578727	5.80116e-06	Macaque													TRUE
GPR82										0.496073	0.0197804	Human													FALSE
GPRIN1	0.724824	6.65024e-08	Macaque	0.629853	3.63734e-12	Macaque	0.481733	0.0467206	Macaque	0.542118	5.10449e-05	Macaque				0.873843	2.28966e-08	Macaque							FALSE
GPS1				0.581808	4.00953e-10	Macaque																			FALSE
GPSM1	0.658006	6.69308e-08	Macaque	0.534	3.04332e-11	Macaque				0.408623	0.0157149	Macaque													FALSE
GPSM2				0.439971	1.05798e-18	Human										0.608715	0.0006603	Human							FALSE
GPX1	1.6461	7.04881e-34	Human	1.17815	2.0958e-104	Human	1.02172	3.25181e-39	Human	1.47165	6.73824e-35	Human				1.08256	4.2513e-16	Human	1.38391	0.00589406	Human				TRUE
GPX4	0.830186	1.7247e-12	Human	0.575079	3.78554e-39	Human				0.593823	1.34088e-06	Human													FALSE
GRAMD1A	0.710745	1.1621e-07	Macaque	0.386216	0.0101012	Macaque	0.588584	0.0157904	Macaque																FALSE
GRB2				0.341552	0.036733	Macaque																			FALSE
GRIA1	1.5718	1.21396e-36	Macaque	0.916351	1.65404e-34	Macaque				1.3853	7.38199e-29	Macaque	1.74827	0.0166717	Macaque	1.2369	3.51984e-15	Macaque							FALSE
GRIA2	1.40596	3.35725e-26	Macaque	0.861671	1.56015e-33	Macaque				1.51304	1.59339e-29	Macaque				0.930202	3.41663e-08	Macaque							TRUE
GRIA4				0.756866	2.3909e-43	Human	0.808891	1.26503e-19	Human																FALSE
GRID2	0.795051	1.92364e-05	Macaque							0.842452	2.46631e-06	Macaque													FALSE
GRIK2	0.708567	6.12142e-09	Macaque	0.460487	3.20871e-08	Macaque				0.657856	0.000324477	Macaque													FALSE
GRIK3	0.721661	3.91284e-09	Macaque							0.568669	0.000111037	Macaque													FALSE
GRIK5	0.672747	2.47005e-09	Macaque	0.596336	2.29449e-23	Macaque				0.642626	9.32263e-09	Macaque													FALSE
GRIN1										0.478271	0.000626255	Macaque													FALSE
GRIN2B	1.42944	2.00022e-20	Macaque	0.864025	4.67059e-23	Macaque				1.5939	4.03375e-21	Macaque													FALSE
GRIP2	0.684345	1.44334e-06	Macaque							0.634599	0.00242152	Macaque													TRUE
GRIPAP1	0.470605	0.0233065	Macaque																						FALSE
GRPEL1							0.268219	0.000921216	Human																FALSE
GSE1	1.15393	8.46113e-17	Macaque	1.35139	6.68373e-69	Macaque				0.94269	4.72524e-10	Macaque	1.86664	0.00164118	Macaque	1.56098	5.11595e-28	Macaque							FALSE
GSK3A	0.886842	2.36589e-15	Macaque	0.589369	6.9796e-14	Macaque				0.747112	1.00099e-11	Macaque				0.87927	4.3431e-09	Macaque							FALSE
GSK3B	0.983764	8.6764e-20	Macaque	0.997184	6.00611e-42	Macaque	0.608724	0.0229966	Macaque	1.0908	6.92136e-18	Macaque				1.19392	5.83734e-16	Macaque							FALSE
GSPT1	1.2787	8.87602e-25	Macaque	0.685174	2.61064e-16	Macaque				0.649723	4.02071e-06	Macaque	1.4171	0.0426073	Macaque	0.768896	2.40965e-06	Macaque							TRUE
GSTA4	0.572133	0.0279984	Human	0.437067	1.19042e-21	Human	0.523027	6.65374e-16	Human	0.683758	2.20948e-08	Human				0.409295	0.0341427	Human							FALSE
GSTM3	0.578956	0.000121594	Macaque	0.737486	3.41514e-17	Macaque	0.808558	2.01651e-12	Macaque	0.651347	0.00685971	Macaque				0.979782	9.02122e-11	Macaque							FALSE
GSTO1				0.581279	3.23023e-36	Human																			FALSE
GSTP1							0.532549	0.0127801	Macaque							0.511858	0.00890209	Macaque							FALSE
GTF2A2				0.265653	1.29748e-06	Human																			FALSE
GTF2E2				0.363091	0.00359659	Macaque																			TRUE
GTF2F2							0.302021	0.000554357	Human																FALSE
GTF2H5																0.72929	0.000342317	Macaque							FALSE
GTF2I				0.615288	2.84007e-44	Human	0.474161	4.33282e-13	Human							0.599539	0.000264527	Human							FALSE
GTF3A				0.350547	9.1907e-12	Human				0.620572	0.000448128	Human													FALSE
GTF3C1	0.401023	0.0428372	Macaque	0.365959	0.00165543	Macaque																			FALSE
GTPBP4							0.38358	8.36759e-05	Human																TRUE
GUK1	1.3705	3.35334e-26	Human	0.696745	1.55713e-39	Human	0.612793	1.24665e-12	Human	1.38132	1.94574e-31	Human				0.843126	3.8285e-13	Human							TRUE
HADHA				0.383513	1.43133e-13	Human										0.627206	0.000195442	Human							TRUE
HAGH				0.474161	2.41992e-19	Human										0.525027	0.0105905	Human							FALSE
HAT1				0.224343	0.00793647	Human																			FALSE
HAUS1				0.250851	1.73663e-05	Human																			FALSE
HCFC1	0.725236	1.17347e-07	Macaque	0.520622	7.15045e-12	Macaque				0.809532	3.37026e-11	Macaque				0.810621	4.47853e-08	Macaque							FALSE
HCFC2	0.541568	6.52683e-05	Macaque																						FALSE
HCN1	1.23067	4.26112e-24	Macaque	1.19771	1.0626e-73	Macaque	0.7816	9.4968e-17	Macaque	0.945148	1.92184e-14	Macaque	1.48682	0.0415608	Macaque	0.879495	3.75868e-09	Macaque							FALSE
HDAC10										0.563295	0.000669961	Macaque													FALSE
HDAC2	0.4773	4.66404e-07	Macaque	0.702784	1.2659e-45	Macaque	1.39123	8.12132e-73	Macaque	0.401202	0.0206544	Macaque													FALSE
HDAC3				0.447954	1.50242e-19	Human	0.459808	1.36587e-08	Human							0.477326	0.0468324	Human							FALSE
HDDC2							0.278681	0.000812629	Human																FALSE
HDGF	0.594917	3.59543e-06	Macaque							0.487459	0.028362	Macaque													FALSE
HDHD2	0.581281	9.75167e-05	Human	0.42634	1.15598e-26	Human																			FALSE
HEATR6	0.436961	0.00260155	Macaque																						FALSE
HECTD1	0.540577	1.16317e-05	Macaque	0.432289	0.0010917	Macaque				0.729531	7.57582e-07	Macaque													FALSE
HECTD2	0.609655	3.20704e-06	Macaque	0.375302	0.000154268	Macaque				0.56743	0.00044508	Macaque													TRUE
HECTD4	1.17862	1.96923e-23	Macaque	0.646357	8.20315e-14	Macaque				0.698936	9.54088e-06	Macaque				0.820928	7.74412e-06	Macaque							FALSE
HECW1										0.546184	0.000341544	Macaque													FALSE
HELZ	0.681739	6.0009e-08	Macaque	0.527681	1.63546e-06	Macaque				0.582859	0.000232548	Macaque				0.626681	0.000797549	Macaque							FALSE
HERC1	1.20117	4.27551e-24	Macaque	0.680925	1.08494e-21	Macaque				0.878784	1.07126e-11	Macaque	1.23405	0.0187584	Macaque	1.01653	1.74815e-10	Macaque							FALSE
HERC2				0.371276	1.28073e-14	Human	0.390101	1.30235e-05	Human							0.899526	1.09564e-07	Human							FALSE
HERC4	0.445837	0.000859732	Macaque							0.532849	0.00261067	Macaque													FALSE
HERPUD2	0.694043	3.78829e-08	Macaque	0.543899	5.8512e-10	Macaque				0.728388	1.11174e-05	Macaque													FALSE
HES4				0.702537	3.58385e-48	Human																			TRUE
HES6				0.838021	7.20592e-42	Human	0.547703	3.10379e-08	Human	0.868862	5.63709e-09	Human													FALSE
HIC2										0.469715	0.00124777	Macaque													FALSE
HIF1AN	0.510674	0.0019845	Macaque	0.666265	2.71345e-22	Macaque				0.682718	3.13211e-08	Macaque				0.688285	0.000387068	Macaque							FALSE
HIGD1A				0.331747	3.90885e-13	Human																			FALSE
HIGD2A				0.344278	2.54839e-07	Human										0.613885	0.00348473	Human							FALSE
HILPDA				0.255625	5.9197e-06	Human	0.345292	0.000109022	Human																FALSE
HINT1										0.511505	6.0733e-13	Human													FALSE
HIP1	0.768299	3.14862e-08	Macaque	0.744941	1.40592e-26	Macaque				0.603761	0.000238327	Macaque				0.755042	0.00378709	Macaque							FALSE
HIP1R	0.576271	0.000991609	Macaque																						FALSE
HIPK2	0.960196	3.66616e-12	Macaque	0.82005	5.62863e-28	Macaque	0.545562	0.00182343	Macaque	0.825162	1.06612e-08	Macaque				0.99802	2.21939e-10	Macaque							FALSE
HIPK3	0.574208	2.00178e-06	Macaque							0.547672	0.000281042	Macaque													FALSE
HIVEP3	0.851859	4.8467e-11	Macaque	0.75586	1.79615e-22	Macaque				0.858013	4.68587e-10	Macaque				0.970989	9.98968e-09	Macaque							FALSE
HK1	0.61276	4.73769e-06	Macaque	0.495175	1.46568e-07	Macaque	0.582211	0.000119852	Macaque	0.644117	0.00105246	Macaque													FALSE
HLTF	0.587405	3.88524e-05	Macaque																						FALSE
HMBOX1	0.598387	1.87179e-05	Macaque	0.726196	3.59133e-22	Macaque				0.748785	2.80035e-08	Macaque													FALSE
HMGA1							0.685203	2.78475e-05	Macaque																FALSE
HMGB1							0.575748	3.87625e-35	Human	0.408801	1.6006e-09	Human													FALSE
HMGB2	0.538825	0.00296042	Human	0.756707	1.16269e-45	Human										1.31477	2.06063e-21	Human							FALSE
HMGB3				0.277771	1.81327e-09	Human										0.545015	0.00638845	Human							FALSE
HMGCS1				0.24981	0.000177618	Human																			FALSE
HMGN1	0.613045	3.30069e-08	Human	0.447771	9.45969e-25	Human	0.631866	1.11373e-20	Human	0.400599	0.000402177	Human													FALSE
HMGN2	1.65979	4.15724e-46	Human	1.30183	1.90482e-124	Human	1.17051	7.42351e-63	Human	0.891407	1.07547e-22	Human	2.22639	2.51154e-08	Human	1.04619	1.37518e-24	Human	1.26068	4.32654e-06	Human				FALSE
HMGN3	1.53296	2.36065e-29	Human	1.41457	9.16523e-135	Human	1.42847	1.00661e-72	Human	1.37208	4.14973e-33	Human	1.96863	0.000242505	Human				1.12762	0.00655462	Human				FALSE
HMGN4	0.596613	3.98231e-09	Macaque	0.797085	8.33108e-43	Macaque	0.768494	2.92604e-19	Macaque	0.851167	4.95669e-13	Macaque				0.838076	3.11465e-09	Macaque							FALSE
HMGXB4	0.495029	0.00205247	Macaque																						FALSE
HNRNPA0	0.488985	0.000254346	Human	0.229121	1.62349e-05	Human	0.662952	3.98951e-23	Macaque							1.01606	2.54109e-34	Human							FALSE
HNRNPA1	2.65998	6.54641e-142	Human	2.77804	0	Human	1.76813	2.25138e-188	Human	2.01398	1.36379e-114	Human	3.69893	1.17454e-16	Human	3.95631	1.89689e-148	Human	1.69196	2.52439e-12	Human	1.96825	6.5595e-05	Human	TRUE
HNRNPA2B1	0.735484	1.48418e-19	Macaque	0.373576	9.61693e-21	Macaque	0.461785	2.40076e-11	Macaque	0.433828	8.84947e-05	Macaque													FALSE
HNRNPA3	0.5297	8.24733e-07	Macaque	0.285998	0.0337084	Macaque																			FALSE
HNRNPAB	1.03563	2.84272e-20	Macaque	0.719614	1.02196e-32	Macaque	0.706404	2.63256e-11	Macaque	0.906959	8.86796e-13	Macaque				0.737312	0.000142383	Macaque							FALSE
HNRNPD	1.42738	2.72319e-43	Macaque	0.800988	1.50256e-45	Macaque				1.20215	6.40371e-24	Macaque	1.81937	2.53668e-05	Macaque	1.43755	2.75481e-28	Macaque							FALSE
HNRNPDL	0.506105	5.31308e-09	Macaque	0.673702	1.31329e-70	Macaque										0.882872	7.16006e-35	Macaque							FALSE
HNRNPF				0.279154	2.12146e-09	Human																			FALSE
HNRNPH1	0.820493	5.51195e-20	Macaque	1.0224	1.99008e-78	Macaque	1.03543	2.03196e-43	Macaque	1.31612	1.38905e-24	Macaque				1.10993	2.51273e-22	Macaque							FALSE
HNRNPH2	0.700871	0.00133243	Human	0.480097	4.26219e-21	Human	0.448494	1.87452e-09	Human	0.620142	9.77685e-05	Human				0.760923	7.47568e-07	Human							FALSE
HNRNPK							0.332787	0.00277345	Macaque							0.675424	2.64906e-16	Human							FALSE
HNRNPL	1.24459	1.14519e-24	Macaque	0.641315	4.04232e-18	Macaque	0.572677	0.000367219	Macaque	0.969689	8.13479e-15	Macaque				0.71736	0.00102477	Macaque							FALSE
HNRNPM	0.560449	0.0451788	Human	0.365327	1.19957e-14	Human										1.03489	3.19784e-17	Human							FALSE
HNRNPU	1.11743	7.21563e-34	Macaque	0.56876	4.53182e-25	Macaque	0.816552	3.11666e-24	Macaque	0.872478	9.69338e-19	Macaque													FALSE
HNRNPUL1	0.533496	0.000143354	Macaque	0.506188	1.73847e-07	Macaque				0.796193	4.87811e-08	Macaque				0.801537	0.000324572	Macaque							FALSE
HNRNPUL2	0.543471	1.46112e-05	Macaque	0.441023	2.07345e-07	Macaque				0.61586	0.00263468	Macaque													FALSE
HOMER1	0.630756	2.51839e-06	Macaque	0.489368	1.96071e-11	Macaque				0.914825	3.06602e-15	Macaque													FALSE
HOMER3				0.629404	1.58298e-24	Human	0.942353	6.4443e-26	Human										1.75122	0.000139355	Human				FALSE
HOOK3	0.728188	3.30085e-09	Macaque	0.552835	1.96107e-09	Macaque				0.901894	6.51906e-12	Macaque													FALSE
HP1BP3	0.589463	1.03064e-08	Macaque	0.834306	1.17382e-49	Macaque	0.716579	3.08722e-09	Macaque	0.829469	6.16953e-14	Macaque				0.822189	3.67077e-11	Macaque							FALSE
HPS3	0.861547	2.60795e-12	Macaque	1.06477	1.67236e-54	Macaque	0.748729	1.40394e-13	Macaque	0.834367	4.91638e-10	Macaque				1.39581	6.62926e-20	Macaque							FALSE
HRAS	0.77061	4.95847e-12	Macaque																						FALSE
HS2ST1	0.539962	0.000130316	Macaque																						FALSE
HS6ST1										0.705977	2.3386e-05	Macaque													FALSE
HSBP1	0.569071	8.87451e-07	Human							0.524484	2.92091e-08	Human													FALSE
HSF1				0.317781	0.0159946	Macaque																			FALSE
HSP90AA1	0.91147	4.86272e-30	Macaque	0.93561	2.59075e-129	Macaque				0.5206	6.94883e-05	Macaque	0.828303	0.00675345	Macaque	1.2225	9.38094e-56	Macaque							FALSE
HSP90AB1	0.327514	0.00383043	Macaque	0.517625	1.38003e-32	Macaque										0.680089	1.68612e-15	Macaque							FALSE
HSP90B1	0.964134	6.248e-14	Macaque	0.724658	5.89001e-22	Macaque				0.647861	7.24917e-05	Macaque				0.717995	3.70771e-05	Macaque							FALSE
HSPA1A							2.3572	1.54272e-18	Macaque	0.23722	2.34656e-19	Human													FALSE
HSPA4	0.939874	3.59426e-16	Macaque	0.537934	6.0785e-10	Macaque	0.667563	6.01555e-05	Macaque	0.756983	2.80129e-08	Macaque													FALSE
HSPA8	0.526967	3.2764e-10	Macaque	0.603523	1.87198e-42	Macaque	0.576089	9.57391e-11	Macaque							0.655337	3.22889e-07	Macaque							FALSE
HSPB1							2.36684	5.92145e-48	Macaque										2.95058	0.00025196	Macaque				FALSE
HSPD1				0.31762	2.95708e-15	Human																			FALSE
HSPE1	1.59719	1.49319e-34	Human	1.25252	1.49649e-131	Human	0.580695	7.39615e-24	Human	1.22096	1.62583e-29	Human	2.47074	1.40665e-08	Human	1.42145	8.30406e-30	Human	1.66276	4.26481e-06	Human				TRUE
HSPH1	0.538045	9.31703e-05	Macaque	1.07951	1.98153e-41	Macaque	1.18598	1.42228e-20	Macaque							0.860065	0.000372511	Macaque	1.71239	0.00242702	Macaque				FALSE
HTATSF1				0.25371	5.20172e-11	Human										0.469909	0.000814396	Human							FALSE
HTRA2				0.358271	6.4975e-16	Human																			FALSE
HTT	0.582059	8.22358e-07	Macaque																						FALSE
HUWE1	0.985002	3.94253e-16	Macaque	0.682226	8.07082e-18	Macaque				1.04306	1.9004e-18	Macaque				0.864893	1.64835e-07	Macaque							FALSE
HYPK							1.28893	1.02539e-24	Macaque	0.947079	1.60177e-05	Macaque													FALSE
IAH1				0.287256	1.36553e-11	Human	0.326656	1.15637e-05	Human																FALSE
ICE1	0.545538	0.000264778	Macaque																						FALSE
ID2				0.861722	6.95668e-20	Macaque	0.694732	0.000421921	Macaque							1.59236	3.74371e-26	Macaque							FALSE
IDH2							0.748763	7.12542e-11	Macaque																FALSE
IDH3G				0.42917	3.75589e-14	Human	0.53349	3.46427e-11	Human	0.558162	0.0130156	Human													FALSE
IDI1	0.581907	0.0073483	Human	0.701059	7.19109e-39	Human	0.95759	1.16361e-32	Human	0.842787	1.00746e-10	Human				0.799691	5.79835e-08	Human							FALSE
IDS				0.544618	7.60788e-30	Human	0.257977	6.22326e-05	Human	0.535841	7.25478e-06	Human													FALSE
IER2	0.899276	2.75411e-05	Human	0.811595	2.14536e-36	Human				1.01545	4.85058e-10	Human				1.43017	1.16126e-17	Human							FALSE
IER3IP1				0.243601	1.27302e-07	Human	0.249907	0.000401158	Human																FALSE
IFI27L2	1.30206	5.83055e-31	Macaque	1.44841	2.89963e-125	Macaque	1.88733	6.23717e-93	Macaque	1.02344	7.8393e-14	Macaque	1.64285	0.00362319	Macaque	1.31857	1.03429e-27	Macaque	1.26915	0.0139522	Macaque				FALSE
IFI44	1.08335	7.38281e-16	Human	1.29685	2.13683e-108	Human	1.15721	1.02864e-41	Human	1.19414	2.98147e-20	Human				0.935752	1.74538e-11	Human	1.22737	0.00448628	Human				TRUE
IFNAR1				0.339899	2.24899e-11	Human										0.596831	0.00453258	Human							TRUE
IFRD1				0.382306	7.0148e-12	Human																			FALSE
IFT52				0.355355	2.38585e-12	Human																			FALSE
IFT88	0.68702	5.65582e-07	Macaque	0.564102	2.73032e-12	Macaque	0.480728	0.00240881	Macaque	0.549268	5.88111e-05	Macaque				0.645285	0.00391106	Macaque							TRUE
IGF1							0.623049	1.63132e-12	Human																FALSE
IGF1R	1.34222	2.16049e-26	Macaque	1.24443	9.18036e-71	Macaque	0.592631	0.0295963	Macaque	1.43247	3.19754e-29	Macaque				1.50981	2.31525e-24	Macaque							FALSE
IGFBP2	0.990095	2.16568e-11	Macaque	1.16641	1.52703e-74	Human	1.20159	5.73269e-50	Human	0.533933	0.0104061	Human													FALSE
IGFBPL1	1.36148	6.53915e-26	Macaque	1.3446	7.25871e-94	Macaque	1.70772	4.05827e-57	Macaque	1.24886	4.27746e-17	Macaque	2.00064	0.000548747	Macaque	1.97508	2.24425e-39	Macaque	2.02525	3.36527e-06	Macaque				FALSE
IGHMBP2	0.610606	5.65622e-07	Macaque	0.571647	4.78242e-18	Macaque				0.574911	0.000288813	Macaque				0.538886	0.0042251	Macaque							TRUE
IGLON5	0.670525	5.12871e-07	Macaque	0.471895	1.23808e-05	Macaque				0.773039	3.22001e-09	Macaque				0.560939	0.0386998	Macaque							FALSE
IGSF3										0.454154	0.0143891	Macaque													FALSE
IGSF8				0.398942	1.45058e-20	Human																			FALSE
IK	0.583936	3.98268e-05	Macaque	0.546268	3.38437e-15	Macaque																			TRUE
IKZF4	0.533476	0.000855169	Macaque							0.583211	5.56262e-07	Macaque													FALSE
IL6ST	0.627007	7.04863e-10	Macaque																						FALSE
ILF2	0.567251	0.0104426	Human	0.644363	8.87934e-43	Human	0.473684	2.79983e-13	Human							0.903795	8.52176e-12	Human							FALSE
ILF3	0.641511	7.82054e-09	Macaque	0.599217	8.85243e-20	Macaque				0.457833	0.0182098	Macaque													FALSE
ILK																0.587564	1.21541e-05	Human							FALSE
INA	1.69031	3.7432e-67	Macaque	1.23311	6.22467e-149	Macaque	1.12645	2.65708e-59	Macaque	1.38963	1.54146e-43	Macaque	1.73756	3.94483e-05	Macaque	1.50783	2.20919e-45	Macaque							FALSE
ING2	0.495797	0.000930616	Macaque																						FALSE
INO80	0.750107	3.99877e-11	Macaque	0.410836	3.65736e-05	Macaque				0.568816	9.27178e-05	Macaque													FALSE
INO80D	0.535409	0.00333489	Macaque	0.492321	2.28016e-06	Macaque				0.46619	0.00927323	Macaque				0.651252	1.89723e-05	Macaque							FALSE
INPP4A	0.775828	4.80852e-10	Macaque	0.599591	9.82752e-16	Macaque				0.584187	1.56029e-06	Macaque				0.600656	0.00557897	Macaque							TRUE
INPP5F	0.389058	0.0121512	Macaque																						FALSE
INSM1				0.501712	3.64011e-22	Human	0.491248	8.25961e-08	Human																FALSE
INSR										0.730412	0.000261383	Macaque													FALSE
INTS3										0.484919	0.000234349	Macaque													FALSE
INTS6	0.408746	0.0467418	Macaque																						FALSE
IP6K1	0.731846	4.78847e-10	Macaque	0.366606	1.43354e-05	Macaque																			FALSE
IPO9	0.940087	7.11994e-12	Macaque	0.697658	3.0728e-17	Macaque				0.824521	3.04682e-10	Macaque													FALSE
IQGAP1	0.740796	4.97096e-10	Macaque	0.485081	2.97689e-09	Macaque				0.789307	5.31411e-12	Macaque				0.634504	0.01307	Macaque							FALSE
IQSEC1	0.675709	1.7834e-08	Macaque	0.428697	5.6759e-05	Macaque				0.703202	1.19632e-07	Macaque													FALSE
IREB2	0.555689	1.78208e-05	Macaque	0.383552	0.000456611	Macaque																			TRUE
IRF2BP2	0.796803	5.88513e-11	Macaque	0.581029	2.02584e-09	Macaque	0.844195	1.16944e-10	Macaque	0.906978	1.56311e-09	Macaque				1.01179	1.59322e-09	Macaque							FALSE
IRF2BPL	0.488012	5.47655e-05	Macaque																						FALSE
IRGQ	0.778648	3.85913e-10	Macaque	0.803182	1.14303e-34	Macaque	0.5087	0.0119766	Macaque	0.898584	8.15664e-12	Macaque				0.862309	2.0843e-08	Macaque							FALSE
IRS2	0.851467	1.2707e-10	Macaque	0.942052	2.3565e-25	Macaque				0.870612	7.4818e-10	Macaque				1.05297	1.36713e-12	Macaque							FALSE
ISCU				0.381889	1.33795e-13	Human										0.52827	0.0184061	Human							FALSE
IST1				0.501488	6.32176e-06	Macaque				0.671273	3.23953e-05	Macaque													TRUE
ITCH				0.396847	4.6381e-05	Macaque																			FALSE
ITFG2	0.936952	1.44868e-15	Macaque	0.78735	4.03449e-21	Macaque	0.65324	4.25599e-06	Macaque	0.851072	8.06633e-12	Macaque	1.70682	0.0294143	Macaque	0.625892	0.0069731	Macaque							FALSE
ITGB1BP1				0.403027	4.32715e-07	Macaque	0.570683	0.00179683	Macaque																FALSE
ITM2B	0.430945	0.00120371	Macaque	0.618034	1.02054e-25	Macaque	0.637053	8.40189e-11	Macaque							0.83438	2.76164e-14	Macaque							FALSE
ITM2C				0.420047	1.21674e-18	Human																			FALSE
ITSN1	0.581827	0.000134144	Macaque																						FALSE
ITSN2										0.458474	0.000433648	Macaque													FALSE
IVNS1ABP	0.441053	0.00839873	Macaque	0.571817	7.71597e-08	Macaque	0.563359	0.0264048	Macaque	0.592296	0.00581639	Macaque													TRUE
JADE1	0.665676	1.80041e-06	Macaque																						FALSE
JAKMIP2	1.16476	4.11727e-27	Macaque	0.647139	6.85826e-21	Macaque				0.980553	8.99158e-14	Macaque				0.912701	2.45038e-08	Macaque							FALSE
JARID2	0.990511	2.46126e-15	Macaque	0.91711	9.00164e-28	Macaque	0.652802	0.000725145	Macaque	1.01377	3.80323e-14	Macaque				1.06802	1.91081e-11	Macaque							FALSE
JAZF1	0.429569	0.00381191	Macaque	0.396447	0.000125309	Macaque																			FALSE
JKAMP				0.277538	2.13534e-11	Human																			FALSE
JMJD1C	0.792404	9.22544e-13	Macaque	0.562343	6.57858e-09	Macaque				0.679277	0.000330329	Macaque													FALSE
JMJD6				0.287443	0.026751	Macaque																			FALSE
JMY	0.702083	1.32989e-10	Macaque	0.498945	2.97877e-09	Macaque				0.580139	1.27123e-05	Macaque				0.752528	1.60235e-08	Macaque							FALSE
JOSD1	0.900388	1.06525e-15	Macaque	0.578892	4.15738e-16	Macaque	0.528155	0.00217338	Macaque	0.735054	5.03839e-08	Macaque													FALSE
JPH4	0.969696	1.9371e-14	Macaque	0.463798	1.31648e-07	Macaque				0.808644	7.94341e-09	Macaque	1.51331	0.0414418	Macaque	0.646577	0.000211762	Macaque							FALSE
JTB							0.562483	2.03812e-05	Macaque																FALSE
JUN				0.557534	4.57258e-25	Human	0.801682	6.84037e-05	Macaque	0.465531	1.29029e-06	Human				1.59345	1.53348e-26	Human							FALSE
JUNB							0.900397	1.4143e-09	Macaque							0.67854	0.000646111	Human							FALSE
JUND	1.33347	5.5754e-14	Macaque	0.750911	5.72589e-17	Human	0.56302	2.11424e-10	Human																FALSE
KALRN	1.09343	9.20031e-23	Macaque	0.666914	3.40584e-14	Macaque				1.12658	3.44238e-18	Macaque	1.81623	0.000480051	Macaque	0.968972	2.20596e-08	Macaque							FALSE
KANSL1	1.67256	3.08237e-44	Macaque	1.54374	1.53092e-116	Macaque	0.922607	2.40828e-12	Macaque	1.35602	3.20155e-27	Macaque	1.43431	0.0198401	Macaque	1.92479	3.72987e-45	Macaque							FALSE
KAT5	0.718119	3.71616e-06	Human	0.577501	5.68548e-32	Human										0.736707	3.10294e-09	Human							TRUE
KAT6A	1.07755	8.76108e-22	Macaque	0.734558	7.14386e-18	Macaque				0.810414	9.27587e-10	Macaque	1.32157	0.0120223	Macaque	0.750851	0.00104256	Macaque							FALSE
KAT6B	1.36058	3.41379e-32	Macaque	1.14812	1.68772e-73	Macaque				1.13552	1.97399e-18	Macaque	1.94157	2.07932e-07	Macaque	1.5859	5.48467e-39	Macaque							FALSE
KAT7	0.463181	0.000716757	Macaque	0.420495	1.2987e-05	Macaque				0.469322	0.025106	Macaque													FALSE
KATNBL1	0.451689	0.00545918	Macaque																						TRUE
KAZN	0.395561	0.0110557	Macaque																						FALSE
KBTBD7				0.270489	9.37069e-07	Human																			FALSE
KCMF1	0.787939	6.2935e-09	Macaque	0.464924	8.27243e-09	Macaque				0.586916	1.27067e-05	Macaque				0.85432	4.15329e-07	Macaque							FALSE
KCNB1	0.548061	9.10154e-07	Macaque							0.673001	3.56164e-07	Macaque													FALSE
KCNH7	0.551212	7.62354e-07	Macaque																						FALSE
KCNJ6							0.542923	2.56072e-11	Human																FALSE
KCNMA1										0.531611	0.000198928	Macaque													FALSE
KCNMB4	0.710394	3.42347e-09	Macaque	0.376208	0.00101235	Macaque				0.574759	5.736e-05	Macaque				0.728586	1.35063e-05	Macaque							FALSE
KCNQ2	0.924376	3.24962e-15	Macaque													0.605646	0.0363836	Macaque							FALSE
KCNQ3										0.456743	0.0104297	Macaque													FALSE
KCTD10	0.353179	0.0305014	Macaque	0.496234	3.29384e-08	Macaque																			FALSE
KCTD12	0.650094	0.000294023	Macaque	0.473284	0.0459217	Macaque				1.24577	2.38105e-15	Macaque													FALSE
KCTD16	0.613758	2.49027e-05	Macaque																						FALSE
KCTD17	0.430855	0.0027674	Macaque																						FALSE
KDM1A	1.51341	3.25897e-37	Macaque																						FALSE
KDM2A	0.904677	1.86991e-14	Macaque	0.530979	4.91682e-06	Macaque				0.831433	1.0612e-08	Macaque				0.792251	1.90237e-05	Macaque							FALSE
KDM3B	0.721327	4.97291e-09	Macaque	0.563044	1.13165e-15	Macaque				0.574469	2.34341e-05	Macaque													FALSE
KDM4A										0.4682	0.0155918	Macaque													FALSE
KDM4B	0.731003	3.53134e-09	Macaque	0.602115	4.54234e-14	Macaque				0.492683	0.000177785	Macaque													FALSE
KDM5A	1.39803	4.967e-32	Macaque	1.16376	1.24866e-64	Macaque				1.15778	3.69621e-17	Macaque	1.99701	9.03921e-06	Macaque	1.13501	1.16627e-14	Macaque							FALSE
KDM5B	0.955882	1.42056e-16	Macaque	0.823917	9.30748e-21	Macaque				0.86815	2.11522e-07	Macaque													FALSE
KDM6B	1.62016	6.15755e-39	Macaque	1.4884	1.04703e-109	Macaque	1.22794	4.9657e-33	Macaque	1.80285	9.26916e-42	Macaque	1.93215	0.000248628	Macaque	1.60302	2.61048e-29	Macaque				2.01796	0.00116269	Macaque	FALSE
KHDRBS1	1.01747	2.4325e-26	Macaque				0.429886	1.56425e-05	Macaque																FALSE
KHDRBS3	0.463199	0.0473595	Macaque	0.238656	0.00369252	Human	0.981071	1.72736e-25	Human																FALSE
KHSRP	0.590285	1.01683e-06	Macaque	0.406012	0.0281218	Macaque				0.570734	9.19447e-05	Macaque													FALSE
KIAA0232	0.842847	1.11232e-10	Macaque	0.531438	9.32557e-05	Macaque				0.929113	5.30957e-13	Macaque													FALSE
KIAA1109	0.516455	0.0174113	Macaque							0.65924	0.0001403	Macaque													FALSE
KIAA1191				0.441031	7.2933e-18	Human																			FALSE
KIAA1328	0.655169	7.51172e-08	Macaque	0.440841	0.0012462	Macaque				0.621089	2.64655e-05	Macaque													FALSE
KIAA1549	1.1443	1.61183e-22	Macaque	1.26343	4.78748e-80	Macaque	0.59222	0.0147852	Macaque	1.40522	4.70993e-26	Macaque	1.68981	0.00969768	Macaque	1.39437	2.54177e-22	Macaque							FALSE
KIAA1586							0.226562	0.000608283	Human																FALSE
KIAA1841	0.470297	0.00184862	Macaque																						TRUE
KIAA1958	0.710694	3.39789e-06	Macaque	0.663068	2.24242e-13	Macaque																			FALSE
KIAA2026	0.783674	1.88978e-10	Macaque	0.609806	8.35265e-13	Macaque				0.91053	3.55235e-11	Macaque	1.85798	0.00078556	Macaque										TRUE
KIDINS220	0.872739	5.30214e-18	Macaque	0.487025	2.64322e-14	Macaque				0.935273	1.10409e-14	Macaque				0.642363	0.0030481	Macaque							FALSE
KIF1A							0.364725	2.18385e-06	Human																FALSE
KIF1B	1.39385	6.7173e-42	Macaque	0.950765	3.11361e-56	Macaque				1.05353	5.10418e-19	Macaque	1.66667	1.28913e-05	Macaque	0.987751	6.72041e-13	Macaque							FALSE
KIF21A				0.264956	4.67766e-08	Human	0.314336	5.43081e-05	Human																FALSE
KIF21B	1.35414	1.4833e-28	Macaque	1.15074	1.20868e-60	Macaque	0.759063	8.38125e-10	Macaque	1.36385	1.30605e-27	Macaque	1.88678	0.000240168	Macaque	1.69786	6.64351e-32	Macaque				2.4047	0.000444244	Macaque	FALSE
KIF2A	0.87723	6.49733e-17	Macaque	0.482303	2.57834e-16	Macaque																			FALSE
KIF3A	0.542762	0.000284648	Macaque	0.506764	7.28622e-08	Macaque				0.672934	0.000222312	Macaque													FALSE
KIF3C	0.950926	2.29168e-14	Macaque	0.739419	6.25235e-28	Macaque				0.833399	1.05793e-11	Macaque				0.935886	3.74503e-10	Macaque							FALSE
KIF5A	0.776405	1.97228e-09	Macaque	0.488518	1.08868e-05	Macaque				0.760387	1.95331e-07	Macaque													FALSE
KIF5B	0.678284	1.20293e-07	Macaque	0.443544	8.24654e-09	Macaque																			FALSE
KIF5C	1.50875	4.14142e-38	Macaque	0.606593	1.55168e-18	Macaque	0.371915	4.19908e-07	Human	0.638555	0.00110534	Macaque	1.67277	0.00324414	Macaque	1.75025	4.91828e-37	Macaque							FALSE
KIFAP3	0.558093	2.80069e-05	Macaque													1.03166	2.13706e-11	Macaque							FALSE
KLC1				0.570395	8.05693e-12	Macaque	1.12235	7.33052e-28	Macaque	0.735585	2.88572e-08	Macaque													FALSE
KLF12	0.731947	6.93299e-11	Macaque	0.756175	2.01926e-23	Macaque				0.672072	2.37755e-06	Macaque				1.08261	7.4101e-13	Macaque							FALSE
KLF13	1.18583	3.67769e-19	Macaque	0.457566	0.000591765	Macaque				0.793285	5.59871e-09	Macaque				0.86427	2.37638e-08	Macaque							FALSE
KLF3				0.468807	0.000116538	Macaque																			FALSE
KLF6				0.850735	9.2003e-49	Human				0.550731	0.000553541	Human				0.992097	3.52681e-11	Human							FALSE
KLF7	1.19791	3.91645e-24	Macaque	0.881696	8.61097e-36	Macaque	0.605186	0.0154219	Macaque	0.961013	6.1568e-14	Macaque				1.01796	6.87965e-13	Macaque				2.2931	0.000579034	Macaque	FALSE
KLHDC10				0.441444	3.00864e-05	Macaque				0.459961	0.00368918	Macaque													FALSE
KLHDC2				0.436623	4.62884e-17	Human										0.581037	0.0260034	Human							FALSE
KLHDC4	0.609939	4.26346e-07	Macaque							0.554237	8.24455e-05	Macaque													TRUE
KLHL23	1.38986	2.39993e-33	Macaque	0.975453	1.36309e-44	Macaque	0.682112	6.14604e-08	Macaque	1.25467	9.16227e-26	Macaque				1.39543	3.27076e-25	Macaque							FALSE
KLHL24	0.917763	1.19187e-11	Macaque	0.52216	5.52941e-06	Macaque				0.827056	8.9791e-09	Macaque													FALSE
KLHL35																			1.6099	6.62694e-05	Human				TRUE
KLHL42	0.948272	4.48591e-15	Macaque	0.722543	1.51026e-20	Macaque				0.985956	2.11195e-15	Macaque				0.845813	3.20498e-07	Macaque							TRUE
KLHL5	0.894708	5.07807e-12	Macaque	0.677021	1.27862e-27	Macaque				1.17436	6.66111e-14	Macaque													FALSE
KLHL7				0.42482	5.59212e-19	Human										0.731649	6.45824e-05	Human							FALSE
KLHL9				0.398532	0.00424538	Macaque	0.606545	0.0024721	Macaque	0.689231	0.00914962	Macaque													FALSE
KMT2A	1.24871	6.18008e-32	Macaque	0.366695	0.00268443	Macaque	0.275368	0.000285499	Human	0.981211	1.66156e-12	Macaque	1.32375	0.0211135	Macaque	0.842491	4.64353e-08	Macaque							FALSE
KMT2B	0.722516	1.71956e-11	Macaque							0.64181	1.14277e-06	Macaque													FALSE
KMT2C	1.29485	5.0117e-25	Macaque	1.12947	2.83807e-55	Macaque	0.779187	6.89229e-11	Macaque	1.16824	5.71025e-20	Macaque	1.99056	1.96306e-05	Macaque	0.996869	3.54956e-11	Macaque							FALSE
KMT2D	0.990636	1.29626e-15	Macaque	1.01375	2.39827e-52	Macaque	0.597083	5.27089e-07	Macaque	1.18526	8.86597e-21	Macaque				0.909693	8.75388e-11	Macaque							FALSE
KMT2E	0.802813	3.17505e-14	Macaque	0.596458	4.13733e-20	Macaque				0.917327	3.43926e-16	Macaque				0.633185	4.377e-07	Macaque							FALSE
KNOP1				0.351618	2.35837e-09	Human	0.484027	2.90826e-11	Human																FALSE
KPNA2				0.496628	5.89361e-22	Human										0.930151	3.06031e-11	Human							FALSE
KPNA4	1.05844	4.32663e-17	Macaque	0.593473	1.88633e-10	Macaque				0.68381	2.60193e-05	Macaque				0.824342	3.11938e-05	Macaque							FALSE
KPNA6	0.813549	9.05199e-08	Macaque	0.79413	1.44207e-22	Macaque				0.735229	9.26543e-07	Macaque				0.922759	1.73028e-08	Macaque							FALSE
KPNB1	0.619541	1.14617e-05	Macaque																						FALSE
KRAS				0.576433	1.10373e-05	Macaque										1.06244	4.17407e-11	Macaque							FALSE
KRBOX4				0.508908	5.48913e-09	Macaque																			FALSE
KRIT1				0.268032	6.53488e-07	Human																			FALSE
KRR1	0.76781	7.97957e-09	Macaque	0.588729	1.12946e-10	Macaque				0.573782	0.000499011	Macaque				0.773746	5.50293e-05	Macaque							TRUE
KTN1	0.818074	1.24426e-09	Macaque	0.755553	1.06649e-24	Macaque				0.733783	1.69312e-05	Macaque				0.958033	1.18455e-08	Macaque							FALSE
LAGE3				1.07832	2.21238e-50	Macaque	1.30558	3.23573e-39	Macaque							1.14609	1.06258e-13	Macaque							FALSE
LAMTOR2										0.441795	0.00389488	Human													FALSE
LAMTOR5	0.961867	4.01895e-16	Human	0.686902	3.82049e-50	Human	0.298852	1.58962e-05	Human	0.915552	2.73372e-17	Human				0.941429	9.41398e-15	Human							TRUE
LANCL1	0.608686	5.08439e-05	Macaque	0.404006	7.17401e-06	Macaque	0.664696	1.40621e-07	Macaque																FALSE
LAPTM4A				0.301944	4.81108e-07	Human				0.462313	0.000243446	Human													FALSE
LAPTM4B	0.982992	3.98507e-16	Macaque	0.728537	3.65103e-20	Macaque	0.719394	1.11452e-08	Macaque	0.754779	1.31123e-06	Macaque				1.06863	1.01759e-12	Macaque							FALSE
LARP1	1.06901	1.0153e-16	Macaque	0.885975	2.69178e-35	Macaque				1.28148	5.81128e-18	Macaque				1.09254	1.41909e-12	Macaque							FALSE
LARP4	0.388909	0.00253884	Macaque																						FALSE
LARP4B	0.634574	4.62571e-07	Macaque							0.559636	5.4385e-06	Macaque													FALSE
LARP7				0.317108	9.10974e-11	Human																			FALSE
LATS1	0.687387	2.22482e-09	Macaque	0.732235	2.96235e-26	Macaque	0.552878	0.000482563	Macaque	0.796134	3.26024e-10	Macaque				0.771669	6.54656e-06	Macaque							FALSE
LBR				0.228924	8.96424e-05	Human										0.591271	0.0013809	Human							FALSE
LCMT1				0.350806	3.55828e-11	Human	0.627752	4.40531e-16	Human							0.616942	0.00109158	Human							TRUE
LCOR	1.18919	1.66788e-21	Macaque	1.17043	5.22166e-57	Macaque	0.65066	0.00534095	Macaque	1.16408	4.54868e-19	Macaque				1.41138	2.94965e-22	Macaque							FALSE
LDB1	0.541833	2.84022e-06	Macaque	0.572923	1.90447e-13	Macaque				0.718323	4.30571e-11	Macaque				0.619488	1.97498e-05	Macaque							FALSE
LDHA				0.32328	5.75054e-08	Human																			TRUE
LDHB	2.1572	1.67888e-60	Human	2.02324	2.39963e-244	Human	2.30347	6.34421e-144	Human	2.25601	3.41737e-72	Human	2.22365	0.00111561	Human	2.13918	1.17469e-60	Human	1.63661	2.61993e-06	Human				FALSE
LDLR	0.739571	1.44277e-10	Macaque	0.557324	1.31553e-21	Macaque																			FALSE
LDLRAD4	0.537425	0.00146573	Macaque													0.643014	0.000309039	Macaque							FALSE
LDOC1	0.614515	6.18935e-05	Macaque	0.810936	1.66128e-28	Macaque	0.863403	1.87293e-13	Macaque	0.698734	0.000277731	Macaque				0.938684	7.11999e-09	Macaque							FALSE
LEMD3	0.575901	1.17258e-05	Macaque																						FALSE
LENG8	0.588961	1.21033e-05	Macaque	0.669451	1.28494e-13	Macaque				0.942052	1.22303e-13	Macaque				0.961946	7.32583e-09	Macaque							FALSE
LEPROT				0.772894	3.51555e-46	Human	0.410868	1.25336e-08	Human							0.864671	2.3768e-10	Human							FALSE
LGI1	1.14971	3.512e-22	Macaque	1.08078	6.06524e-60	Macaque	1.35869	6.4607e-35	Macaque	0.934321	2.4317e-12	Macaque				1.41724	9.25181e-24	Macaque	2.48872	1.05316e-08	Macaque				FALSE
LHX6	1.38018	1.28377e-34	Macaque	0.938397	3.12436e-47	Macaque	0.591465	0.00605313	Macaque	1.22445	6.64704e-24	Macaque	1.6415	0.00590307	Macaque	1.10263	7.84653e-11	Macaque							FALSE
LIMCH1							0.554404	8.11136e-10	Human	1.27998	1.44669e-07	Macaque													FALSE
LIMD2							0.575913	0.00155717	Macaque																FALSE
LIN7C	0.443734	0.000607082	Macaque	0.527522	1.14568e-08	Macaque										0.89253	1.6695e-07	Macaque							FALSE
LMBR1										0.493777	0.000585057	Macaque				0.50564	0.00601402	Macaque							TRUE
LMBR1L				0.396808	0.000447395	Macaque																			FALSE
LMNA				0.480867	3.60502e-07	Macaque				0.577626	4.49546e-05	Macaque													FALSE
LMNB1	0.640489	9.50703e-08	Macaque							0.805233	1.15292e-06	Macaque													FALSE
LMO3				0.653137	9.89299e-12	Macaque				0.554201	0.0296773	Macaque				1.05901	1.93428e-10	Macaque							FALSE
LMO4				0.655867	5.06124e-30	Human	0.788288	8.60274e-23	Human	1.47016	6.69274e-33	Human													FALSE
LMTK2	0.640854	1.2218e-08	Macaque																						FALSE
LONRF2										0.527553	0.000941412	Macaque													FALSE
LPAR1	0.643793	2.25862e-10	Macaque							0.980144	9.04924e-18	Macaque													FALSE
LPGAT1	0.707011	1.90701e-09	Macaque							0.566217	0.00091839	Macaque													FALSE
LRCH2	0.586271	2.27009e-06	Macaque	0.420128	0.000107714	Macaque																			FALSE
LRCH3	0.576561	2.95304e-05	Macaque																						FALSE
LRP1	0.7129	5.92234e-08	Macaque	0.756389	1.20436e-23	Macaque				1.21037	1.66483e-22	Macaque				1.06334	6.52626e-12	Macaque							FALSE
LRP12	0.44593	0.001081	Macaque	0.413948	0.00106878	Macaque				0.604516	0.000568376	Macaque													FALSE
LRP6										0.554578	9.00448e-06	Macaque													FALSE
LRP8	1.99734	1.29745e-43	Macaque	1.49436	6.20429e-98	Macaque	1.09651	7.52989e-23	Macaque	1.8552	9.71823e-42	Macaque	1.62166	0.00366721	Macaque	1.41682	1.28211e-23	Macaque							FALSE
LRPAP1	0.418689	0.0277308	Macaque	0.522654	4.61676e-07	Macaque																			FALSE
LRPPRC	0.634799	9.93954e-09	Macaque	0.431087	4.60218e-05	Macaque																			FALSE
LRRC4										0.414113	0.0191703	Macaque													FALSE
LRRC4B	0.753731	3.2294e-10	Macaque	0.505425	2.91055e-08	Macaque				0.650922	4.58177e-07	Macaque													FALSE
LRRC58	0.478089	0.00123414	Macaque	0.378423	0.0151632	Macaque				0.520679	0.0111133	Macaque													FALSE
LRRC7	2.01445	7.69303e-63	Macaque	1.64693	8.57952e-130	Macaque	1.10022	2.4817e-20	Macaque	1.68748	1.5096e-40	Macaque	2.06179	2.18258e-06	Macaque	1.40491	1.05457e-23	Macaque							TRUE
LRRC8B				0.440248	5.54323e-05	Macaque																			FALSE
LRRCC1	0.484811	0.000156981	Macaque																						FALSE
LSAMP				0.698267	1.43894e-35	Human	0.578735	9.42173e-14	Human							1.31781	1.10881e-20	Human							FALSE
LSM1	0.526632	0.0128636	Human	0.632874	6.76987e-48	Human	0.47917	2.24602e-13	Human	0.462623	0.000631867	Human				1.0189	3.23038e-16	Human							FALSE
LSM12	0.441155	0.0135766	Macaque	0.561693	6.59016e-12	Macaque										0.587934	0.00198785	Macaque							FALSE
LSM14B	0.790576	3.0456e-12	Macaque	0.521319	8.5474e-14	Macaque				0.537128	0.000273633	Macaque				0.624582	0.000352691	Macaque							FALSE
LSM2				0.225192	1.8312e-07	Human																			FALSE
LSM3	0.577303	0.000245919	Human							0.479633	0.0413475	Human													TRUE
LSM5	0.688532	0.000251738	Human	0.327553	1.42516e-12	Human																			FALSE
LSM7	0.711105	1.24343e-08	Human							0.476036	0.00209019	Human													TRUE
LUC7L	0.632124	5.45076e-09	Macaque							0.616238	1.80713e-05	Macaque													TRUE
LUC7L3	0.58451	1.94702e-09	Macaque	0.368626	4.39439e-05	Macaque				0.615266	2.30138e-07	Macaque													FALSE
LY6H																0.644914	0.00537294	Macaque							FALSE
LYPLA1				0.432328	1.71466e-18	Human										0.631372	3.92327e-05	Human							FALSE
LYRM2							0.262147	0.0372405	Human																FALSE
LZIC	0.780428	8.74745e-10	Macaque	0.658772	1.82367e-13	Macaque				0.578625	0.00914311	Macaque													FALSE
MACF1	1.68849	5.97913e-50	Macaque	1.11089	1.11096e-80	Macaque	0.585235	0.000679639	Macaque	1.58992	8.62195e-35	Macaque	1.8854	2.81554e-06	Macaque	1.17003	5.95599e-20	Macaque							FALSE
MAD1L1	1.00698	4.20481e-14	Human	0.777029	2.53664e-49	Human	0.762896	2.19295e-22	Human	0.506585	2.67951e-06	Human													FALSE
MAD2L2							0.636141	9.82422e-05	Macaque																FALSE
MADD	0.444461	0.018721	Macaque							0.466141	0.000358581	Macaque													FALSE
MAF	2.26956	9.66467e-71	Macaque	2.02778	6.49199e-226	Macaque	0.816201	0.00272874	Macaque	2.30447	4.26571e-65	Macaque	3.43369	6.18213e-14	Macaque	3.25168	3.78048e-96	Macaque				2.92527	1.40739e-07	Macaque	FALSE
MAFB	0.721347	3.79311e-07	Macaque	0.423526	8.06443e-07	Macaque				1.19839	2.72537e-18	Macaque													FALSE
MAGED1	0.71207	7.68527e-08	Macaque	0.544931	2.94423e-08	Macaque				0.586251	0.00754537	Macaque													FALSE
MAGED2																0.694888	3.00194e-06	Human							FALSE
MAGEF1				0.28495	2.41783e-07	Human																			TRUE
MAGI1	0.596462	0.000258215	Macaque																						FALSE
MAGI2	1.4305	1.29499e-31	Macaque	0.998815	1.59605e-49	Macaque				1.61104	7.483e-35	Macaque				0.762701	0.000134658	Macaque							FALSE
MAGOH				0.35294	2.1528e-13	Human										0.566692	0.0175368	Human							FALSE
MAK16																0.586438	1.37649e-05	Macaque							FALSE
MAML2	0.558973	0.001385	Macaque	0.477135	1.61366e-05	Macaque				0.582942	4.80064e-05	Macaque				0.853779	1.77686e-06	Macaque							FALSE
MAN1A2							0.460798	2.8691e-10	Human																FALSE
MAN1B1				0.561565	4.1101e-13	Macaque																			FALSE
MANF	0.545185	0.000117432	Macaque	0.442128	0.000270147	Macaque	0.786053	9.45876e-12	Macaque																FALSE
MAP1B	0.816153	1.28164e-32	Macaque	0.706837	2.98775e-110	Macaque	0.580162	2.99634e-33	Macaque	0.479817	1.10759e-05	Macaque	1.04721	7.35045e-05	Macaque	0.842974	4.98931e-38	Macaque							FALSE
MAP1LC3B							0.531036	0.000517678	Macaque																FALSE
MAP2	0.871691	3.71024e-28	Macaque	0.973033	8.77579e-120	Macaque	0.476404	1.96817e-06	Macaque	0.784538	1.32789e-17	Macaque				0.944499	2.73706e-21	Macaque	1.23863	0.0050921	Macaque	1.21383	0.00560751	Macaque	FALSE
MAP2K2	1.64702	7.70535e-42	Macaque	0.872987	1.71453e-34	Macaque	0.640711	0.0007928	Macaque	0.926013	2.58591e-12	Macaque	1.6401	0.00485165	Macaque	1.01001	7.55981e-11	Macaque							FALSE
MAP3K1	0.712567	1.67836e-10	Macaque	0.698259	8.56186e-30	Macaque										0.617424	0.000600218	Macaque							FALSE
MAP3K13							0.305067	0.00254965	Human																FALSE
MAP3K2	0.574804	3.53193e-06	Macaque							0.683758	2.28993e-05	Macaque													FALSE
MAP3K4	0.525531	8.87253e-05	Macaque																						FALSE
MAP4K3	0.451516	0.00108234	Macaque							0.415771	0.00145859	Macaque													FALSE
MAP4K4	1.60446	2.65495e-46	Macaque	1.00574	1.57305e-63	Macaque				1.49795	1.0418e-31	Macaque	1.95513	3.96397e-08	Macaque	1.8134	3.06182e-49	Macaque							FALSE
MAP4K5	0.606791	8.63434e-07	Macaque																						TRUE
MAP7D1	0.795597	3.00013e-12	Macaque	0.503223	5.22542e-08	Macaque	0.629029	0.000237543	Macaque																FALSE
MAPK1				0.51368	4.23677e-10	Macaque										0.533864	0.00605755	Macaque							FALSE
MAPK10	1.6401	1.22363e-47	Macaque	1.45545	2.15705e-121	Macaque	1.12459	2.94249e-27	Macaque	1.42921	1.69068e-35	Macaque				0.891943	1.12357e-10	Macaque							FALSE
MAPK14										0.475263	0.000412378	Macaque													FALSE
MAPK1IP1L	0.619442	2.48629e-06	Macaque	0.504659	6.04408e-09	Macaque	0.564467	0.00135849	Macaque	0.562605	0.000817151	Macaque													FALSE
MAPK8IP2	0.40353	0.00280283	Macaque							0.383942	0.0233537	Macaque													FALSE
MAPK8IP3				0.377875	1.28419e-06	Macaque				0.429202	0.00862719	Macaque													FALSE
MAPK9	0.512004	3.55744e-05	Macaque																						FALSE
MAPRE2	0.66305	4.39481e-06	Macaque	0.480894	0.000144707	Macaque				0.611318	0.000338661	Macaque				1.01512	5.32235e-11	Macaque							FALSE
MAPRE3				0.466272	0.000228714	Macaque	0.491914	0.0187936	Macaque																FALSE
MAPT	0.521385	3.85437e-06	Macaque																						FALSE
MARCKS	1.78169	2.56059e-101	Macaque	0.871309	1.32954e-149	Macaque	0.522591	3.37344e-15	Macaque	1.11384	1.70176e-51	Macaque	1.07344	4.81196e-06	Macaque	1.35392	1.07593e-67	Macaque							FALSE
MARCKSL1	0.797121	1.08853e-44	Human	0.934397	4.41043e-181	Human				0.71297	5.13327e-28	Human	1.30205	1.73981e-08	Human	1.10758	1.72839e-67	Human	1.00742	3.04272e-11	Human				FALSE
MARK1	0.680938	7.36877e-08	Macaque																						FALSE
MARK2	0.729779	8.77019e-11	Macaque	0.508667	9.56921e-11	Macaque				0.636726	4.38945e-09	Macaque													FALSE
MARK3	0.781733	2.59152e-10	Macaque																						FALSE
MAST1	0.474329	0.0134537	Macaque	0.439396	0.00010938	Macaque																			FALSE
MAT2A	0.813859	1.82751e-10	Macaque	0.564842	3.09069e-10	Macaque				0.67912	9.65487e-06	Macaque													TRUE
MATR3	1.59751	1.4255e-33	Macaque	1.39136	1.04158e-93	Macaque	1.99076	2.05404e-67	Macaque	1.82727	1.36377e-41	Macaque				1.10565	7.27119e-17	Macaque							FALSE
MAVS	0.563672	2.04046e-06	Macaque	0.553886	2.14241e-11	Macaque				0.681747	1.00449e-05	Macaque													FALSE
MAX	0.510662	0.00546119	Macaque	0.688425	5.98041e-18	Macaque				0.644427	0.00131668	Macaque				0.73645	0.000144809	Macaque							FALSE
MAZ				0.967827	7.67441e-79	Human	1.02729	7.57208e-38	Human	0.416763	0.000578661	Human				0.543154	2.12239e-05	Human	1.38931	0.000581982	Human				FALSE
MBD1	0.443667	0.00462741	Macaque																						FALSE
MBD3										0.441074	0.000114814	Macaque													FALSE
MBD5	1.40567	2.30222e-30	Macaque	1.3469	2.05712e-80	Macaque	0.857059	8.71302e-14	Macaque	1.52812	1.01449e-34	Macaque	1.55727	0.00981537	Macaque	1.41534	3.28411e-22	Macaque							FALSE
MBIP				0.522152	1.21335e-26	Human	0.345216	5.08593e-06	Human							0.733027	0.000370131	Human							FALSE
MBOAT2										0.568632	0.0133295	Macaque													FALSE
MBTD1	0.522838	0.000138825	Macaque	0.507119	1.19635e-08	Macaque				0.737883	3.87895e-07	Macaque													FALSE
MBTPS1	0.657381	1.05234e-08	Macaque	0.386887	0.0144497	Macaque				0.761095	1.38028e-07	Macaque													FALSE
MCF2L	0.969664	8.94487e-16	Macaque	0.72	1.89692e-17	Macaque	0.533469	0.00244663	Macaque	0.865152	1.97571e-10	Macaque													FALSE
MCFD2										0.49274	0.00136611	Macaque													FALSE
MCL1				0.375038	0.0123551	Macaque	0.610841	0.000179622	Macaque																FALSE
MCM7	0.569703	0.0314923	Human	0.280701	5.96202e-09	Human																			TRUE
MDH1	0.598958	1.28882e-05	Macaque	0.542528	6.54903e-11	Macaque	0.517542	0.00357062	Macaque							0.589878	0.00341383	Macaque							FALSE
MDK				1.31885	6.97556e-73	Human										1.68845	2.88779e-30	Human							FALSE
MDM2	1.26282	1.95754e-24	Macaque	1.24745	3.30495e-73	Macaque	0.716427	1.81779e-08	Macaque	1.30865	4.30888e-28	Macaque				1.60319	2.64872e-28	Macaque							FALSE
MDM4	1.2378	7.89481e-26	Macaque	1.048	4.61818e-49	Macaque				0.810124	5.22678e-11	Macaque				0.802463	7.14031e-05	Macaque							FALSE
MDN1										0.569888	0.000153044	Macaque													FALSE
MEA1	0.596756	0.000212115	Human	0.461459	4.89293e-23	Human				0.592549	1.32294e-05	Human				0.610511	1.74788e-05	Human							FALSE
MEAF6	0.689119	5.65469e-05	Human	0.357626	4.46128e-17	Human																			FALSE
MECP2				0.518615	1.55988e-08	Macaque				0.758451	3.58127e-07	Macaque													FALSE
MED1	1.0053	4.37289e-16	Macaque	0.625318	1.48694e-15	Macaque				0.829537	1.17649e-09	Macaque													FALSE
MED10	0.65304	0.000831107	Human	0.60367	6.68403e-37	Human	0.691265	1.60549e-19	Human	0.631928	3.0833e-05	Human													FALSE
MED13	0.765322	4.53747e-10	Macaque	0.529288	2.19355e-05	Macaque				0.570913	5.3793e-05	Macaque													FALSE
MED13L	1.28106	9.37453e-25	Macaque	1.22647	2.49996e-68	Macaque	0.688767	4.76261e-06	Macaque	1.63851	2.298e-37	Macaque				1.47966	3.20332e-23	Macaque				2.25628	0.000307867	Macaque	FALSE
MED17				0.338454	2.96796e-10	Human										0.5225	0.0183311	Human							TRUE
MED23	0.888317	3.38332e-14	Macaque	0.75486	6.68139e-29	Macaque	0.576881	2.68182e-06	Macaque	0.74528	4.58965e-09	Macaque				1.04639	2.82587e-11	Macaque							TRUE
MED28																0.564252	0.0475191	Human							TRUE
MED29				0.516327	1.29771e-09	Macaque																			FALSE
MED30	0.676441	0.00167728	Human	0.373265	3.09245e-15	Human				0.498764	0.00173259	Human													FALSE
MEF2C	0.45539	0.0254896	Macaque	0.451651	3.74653e-13	Macaque	0.293006	0.000967501	Human							1.34177	5.73648e-15	Macaque							FALSE
MEGF9	1.02767	2.05338e-15	Macaque	0.682539	1.31038e-17	Macaque				0.883712	7.93102e-10	Macaque				0.789997	4.93894e-06	Macaque							FALSE
MEIS2	1.02114	8.66897e-11	Human	0.32589	3.89099e-14	Human																			FALSE
MEIS3							0.656457	1.9774e-14	Human																FALSE
MEST																1.11279	6.2144e-07	Human							FALSE
METAP1D	0.557959	3.41318e-06	Macaque							0.565049	2.36702e-06	Macaque													TRUE
METAP2				0.376738	0.0279263	Macaque										0.829836	5.95235e-07	Macaque							FALSE
METTL21A	0.564171	2.69707e-05	Macaque	0.68238	2.69321e-21	Macaque	0.887749	1.2609e-15	Macaque	0.727131	8.78928e-05	Macaque				0.594794	0.0137586	Macaque							TRUE
METTL9				0.372537	0.00385159	Macaque	0.94115	1.98058e-22	Macaque																FALSE
MEX3A	1.29425	2.50364e-27	Macaque	1.10453	5.12324e-60	Macaque				1.16749	1.77107e-17	Macaque	2.05741	3.56746e-07	Macaque	1.56419	8.255e-41	Macaque							FALSE
MEX3C										0.579892	2.14335e-06	Macaque													FALSE
MFAP1				0.443697	0.00197841	Macaque				0.610726	4.38734e-05	Macaque													FALSE
MFF							0.573901	1.94227e-05	Macaque																TRUE
MFN1	0.424873	0.015729	Macaque	0.443596	0.00104922	Macaque				0.521739	0.00439457	Macaque													TRUE
MGA	0.64346	0.000109062	Macaque	0.443735	1.28829e-05	Macaque				0.457996	0.0099172	Macaque													FALSE
MGAT5	0.672135	2.50462e-08	Macaque	0.51298	4.74362e-14	Macaque				0.70197	3.03646e-08	Macaque													FALSE
MGAT5B	0.698142	1.02076e-09	Macaque	0.657932	3.46757e-28	Macaque				0.930324	2.43144e-16	Macaque				0.705996	7.41856e-07	Macaque							FALSE
MGRN1	1.21988	1.44082e-23	Macaque	1.52585	3.50838e-99	Macaque	0.962414	1.45549e-16	Macaque	1.8873	6.1264e-44	Macaque				1.81918	2.0644e-36	Macaque	1.31418	0.0374688	Macaque				TRUE
MGST3				0.325617	5.2668e-14	Human																			FALSE
MIA3							0.292351	0.00417683	Human																FALSE
MIB1	0.600874	9.34971e-05	Macaque	0.45641	2.06234e-09	Macaque				0.60011	0.00017121	Macaque				0.835642	1.01678e-07	Macaque							FALSE
MICAL3	0.648975	1.05639e-06	Macaque	0.421322	0.000181236	Macaque				0.639301	7.60696e-07	Macaque				0.522618	0.00958311	Macaque							FALSE
MICU1				0.343759	5.66287e-16	Human	0.313327	3.74036e-05	Human																FALSE
MICU3	0.565817	1.0576e-06	Macaque																						FALSE
MIDN	0.689398	2.14438e-07	Macaque	0.635395	1.18798e-12	Macaque				0.816967	1.06109e-06	Macaque				1.11017	5.75122e-14	Macaque							FALSE
MIEF1	0.535911	0.000855573	Macaque	0.510711	4.19972e-09	Macaque				0.600727	8.55414e-06	Macaque				0.620212	0.0171719	Macaque							FALSE
MIER1	0.601088	2.29247e-05	Macaque																						FALSE
MIF	0.676451	3.45713e-05	Human				0.782952	1.36376e-08	Macaque																FALSE
MKKS				0.327531	6.51012e-18	Human										0.461294	0.0333553	Human							FALSE
MKRN3	0.520012	0.000125703	Macaque																						TRUE
MLEC										0.496706	0.0152844	Macaque													FALSE
MLLT1	0.696482	3.34718e-07	Macaque	0.719226	9.40338e-27	Macaque				0.766673	1.5905e-07	Macaque													FALSE
MLLT10	0.512901	4.04418e-06	Macaque																						TRUE
MLLT11	0.761983	7.16131e-36	Human	0.357205	2.28677e-33	Human				0.403405	6.01176e-18	Human	1.38651	6.80783e-09	Human	1.07697	1.58466e-44	Human							FALSE
MLLT3	0.601704	5.186e-05	Macaque	0.455276	2.1041e-05	Macaque				0.833263	2.15264e-07	Macaque				0.536661	0.0166283	Macaque							TRUE
MLLT6	0.669244	9.60074e-09	Macaque																						FALSE
MLX				0.229856	7.20101e-08	Human																			FALSE
MLXIP	0.482933	0.0497243	Macaque	0.373613	0.00805852	Macaque										0.531982	0.0105057	Macaque							TRUE
MMADHC	0.782146	2.32668e-07	Human	0.278675	2.08345e-10	Human	0.234992	0.0059261	Human	0.46387	0.000164531	Human													FALSE
MMD							0.573221	7.83226e-05	Macaque																FALSE
MMP16	0.620099	6.35282e-05	Macaque	0.510359	1.22472e-12	Macaque				0.889158	1.3769e-10	Macaque													FALSE
MN1	0.800057	1.1622e-07	Macaque	1.00745	2.14239e-37	Macaque				0.818016	5.6502e-06	Macaque				1.48251	1.4992e-21	Macaque							FALSE
MNAT1							0.303931	0.0298796	Human																FALSE
MNT	0.950059	3.16623e-13	Macaque	1.04223	1.38115e-50	Macaque				1.02016	7.94727e-19	Macaque				1.28025	3.91832e-16	Macaque							FALSE
MOB1A				0.417283	0.00910395	Macaque				0.569645	0.000576111	Macaque													FALSE
MOB3B				0.557129	2.95556e-22	Human																			FALSE
MOB4	0.686834	0.00211682	Human	0.486798	3.90748e-22	Human				0.531663	0.000474888	Human													FALSE
MORC3	0.53488	1.69073e-05	Macaque							0.452677	0.0146513	Macaque													FALSE
MORF4L1	1.00049	2.37118e-25	Human	0.364094	1.55109e-19	Human	0.853123	6.02653e-42	Human	0.821548	6.29226e-21	Human	1.2259	0.0175461	Human										FALSE
MORF4L2	0.637856	0.0120884	Human	0.4029	1.24423e-15	Human										0.720829	5.88504e-06	Human							FALSE
MOSPD3				0.31092	0.0316316	Macaque	0.622095	0.000858561	Macaque																FALSE
MPC2	0.925901	2.62865e-10	Human	0.85236	4.98e-63	Human	0.55376	5.68695e-16	Human	0.785263	1.22101e-12	Human				0.964767	7.89068e-14	Human							FALSE
MPDU1				0.290354	0.012921	Macaque																			FALSE
MPHOSPH10							0.264732	0.00124746	Human																FALSE
MPHOSPH8							0.302803	0.000189816	Human																FALSE
MPLKIP				0.327523	2.94629e-17	Human																			TRUE
MPND	0.518692	2.0607e-07	Macaque																						FALSE
MPPED1										0.69049	0.000453098	Macaque													FALSE
MPRIP	0.449482	0.00355699	Macaque							0.801606	1.75863e-09	Macaque													FALSE
MPST				0.399468	1.59791e-13	Human										0.695149	2.01604e-05	Human							FALSE
MPV17							0.293501	0.00837133	Human																TRUE
MPZL1	1.28608	1.49591e-28	Macaque	1.16116	3.1133e-60	Macaque	1.25763	1.06038e-33	Macaque	1.20321	1.20943e-22	Macaque	1.53272	0.00348928	Macaque	1.02857	3.58007e-10	Macaque							FALSE
MRAS	0.499636	0.0120518	Macaque	0.511369	9.02633e-07	Macaque	0.482099	0.0069818	Macaque																FALSE
MRGBP	0.542473	9.20121e-07	Macaque																						FALSE
MRPL1							0.325577	0.000180028	Human																FALSE
MRPL11	0.365763	0.0149091	Macaque	0.447045	1.28398e-05	Macaque	0.640385	0.000100366	Macaque																FALSE
MRPL12				0.387825	0.00831062	Macaque																			FALSE
MRPL16				0.352489	3.16166e-10	Human	0.308172	0.000130368	Human																FALSE
MRPL18							0.296809	5.08366e-05	Human																FALSE
MRPL23				0.641187	1.66524e-13	Macaque	0.894352	8.63542e-15	Macaque																FALSE
MRPL27	0.407145	0.0475082	Macaque	0.68512	1.70391e-17	Macaque	0.726603	2.20492e-07	Macaque	0.630999	0.000508515	Macaque				1.11047	2.27667e-14	Macaque							FALSE
MRPL28				0.358725	1.50561e-12	Human	0.46134	7.89373e-08	Human	0.748331	7.8564e-08	Human													TRUE
MRPL3				0.286701	1.31321e-07	Human	0.601925	2.03887e-15	Human																TRUE
MRPL34																0.761626	1.04253e-06	Macaque							FALSE
MRPL35	1.08212	2.63756e-17	Macaque	0.907696	4.84749e-41	Macaque	0.853295	3.12857e-12	Macaque	0.902397	2.68455e-09	Macaque				1.22432	4.22583e-19	Macaque							TRUE
MRPL42							0.587054	0.0159603	Macaque																FALSE
MRPL43				0.297067	3.49292e-13	Human	0.407044	2.42439e-06	Human																FALSE
MRPL44				0.677818	2.10842e-41	Human	0.729317	1.93805e-22	Human	0.506454	0.0153215	Human							1.10523	0.0212734	Human				TRUE
MRPL46							0.369992	4.78909e-07	Human																FALSE
MRPL51				0.243714	2.15521e-07	Human				0.623269	2.00052e-05	Human													FALSE
MRPL53							0.972133	3.46138e-14	Macaque	0.902775	8.94985e-06	Macaque													FALSE
MRPL54				0.230701	1.45352e-06	Human	0.727035	1.86468e-18	Human	0.48907	0.00495885	Human													FALSE
MRPL55	0.929742	4.65364e-07	Human				0.302017	6.94737e-05	Human	0.580554	0.0001332	Human													TRUE
MRPS10				0.402959	3.13706e-17	Human	0.513863	5.35936e-12	Human	0.446313	0.00465601	Human													FALSE
MRPS12				0.541806	1.46123e-11	Macaque	0.647432	2.83713e-05	Macaque							0.744602	0.00020684	Macaque							FALSE
MRPS15				0.485	3.71412e-06	Macaque										0.67165	0.000481425	Macaque							TRUE
MRPS16	0.70112	6.77675e-09	Macaque	0.662801	1.13326e-18	Macaque	0.5738	0.011075	Macaque	0.763319	4.80058e-07	Macaque													FALSE
MRPS18C				0.403414	2.47759e-19	Human	0.484045	1.14147e-11	Human	0.711002	1.27183e-08	Human													FALSE
MRPS21										0.453888	0.00306487	Human													FALSE
MRPS22				0.239421	3.06766e-06	Human	0.341451	8.56627e-05	Human																FALSE
MRPS23							0.397285	5.21028e-06	Human																FALSE
MRPS25				0.39644	0.000388021	Macaque	0.521774	0.0209034	Macaque							0.673226	0.000505238	Macaque							FALSE
MRPS30				0.428208	0.000297524	Macaque																			FALSE
MRPS35				0.281312	1.68787e-08	Human	0.376401	2.5286e-07	Human																FALSE
MRPS36				0.48133	3.37672e-24	Human	0.229238	0.00606599	Human	0.546677	0.00460964	Human													FALSE
MRPS7							0.282561	0.0142464	Human																TRUE
MRPS9				0.521301	4.53867e-07	Macaque																			TRUE
MRTO4				0.266986	3.34221e-09	Human	0.443575	5.91341e-10	Human																FALSE
MSI1	0.57401	7.05034e-05	Macaque	0.6564	2.39216e-16	Macaque	0.729903	4.06672e-09	Macaque	0.964756	4.50999e-13	Macaque				0.659238	0.00117549	Macaque							FALSE
MSI2	0.970801	2.30451e-14	Macaque	0.583762	8.77106e-09	Macaque	0.691643	6.96016e-06	Macaque	0.642996	5.36627e-06	Macaque													FALSE
MSL1	0.746439	1.30761e-10	Macaque	0.600678	1.04661e-12	Macaque				0.875373	2.61695e-10	Macaque													FALSE
MSL2	0.785851	1.39921e-11	Macaque	0.664347	3.5647e-21	Macaque				0.805786	5.09839e-13	Macaque				0.847207	1.2856e-05	Macaque							FALSE
MSL3							0.258873	0.000533167	Human																FALSE
MSMO1				0.580231	5.54397e-28	Human	0.461027	1.12701e-11	Human	0.580635	0.00077326	Human				1.2091	2.10127e-16	Human							FALSE
MSRA	0.698648	6.68959e-10	Macaque	0.597649	1.14352e-14	Macaque				0.643198	2.12258e-05	Macaque				1.05424	1.18533e-11	Macaque							FALSE
MSRB2				0.297736	6.20417e-09	Human																			TRUE
MTA1				0.34424	5.99288e-13	Human										0.612249	0.000258361	Human							FALSE
MTA2	0.678115	5.98807e-10	Macaque	0.578287	2.01482e-14	Macaque	0.900868	5.29718e-19	Macaque	0.687006	1.51437e-06	Macaque				0.573731	3.2289e-05	Macaque							FALSE
MTCH2							0.247926	0.0138219	Human																TRUE
MTDH				0.397401	0.00640268	Macaque																			FALSE
MTERF4							0.341206	3.88272e-06	Human																FALSE
MTF2	0.510647	0.00193983	Macaque							0.553937	0.0448428	Macaque													FALSE
MTG1	0.70504	4.32516e-12	Macaque	0.669825	7.41952e-25	Macaque	0.828541	1.07978e-17	Macaque	0.719314	8.54274e-11	Macaque													FALSE
MTHFR										0.386684	0.00486753	Macaque													FALSE
MTIF2	0.600652	4.9696e-07	Macaque							0.475392	0.0171107	Macaque													TRUE
MTIF3							0.467188	2.05126e-07	Human																TRUE
MTMR4				0.309923	2.18152e-07	Human	0.544375	4.29488e-10	Human																FALSE
MTMR9							0.265517	0.0458885	Human																FALSE
MTPAP	0.569809	1.8714e-05	Macaque	0.57173	9.13418e-17	Macaque				1.04943	1.6208e-17	Macaque													FALSE
MTPN	0.863346	5.28312e-14	Macaque	0.645792	7.35472e-19	Macaque				0.864762	4.38433e-08	Macaque				1.07051	5.29556e-15	Macaque							FALSE
MTURN	1.03209	8.02322e-19	Macaque	0.396186	0.0406132	Macaque							1.3958	0.0304489	Macaque	0.804531	4.63125e-06	Macaque							FALSE
MTX2	0.67645	0.000546569	Human	0.469963	1.39102e-19	Human	0.505076	9.73502e-11	Human																TRUE
MVB12A				0.401325	3.19165e-05	Macaque																			FALSE
MXD1	0.668338	4.3865e-07	Macaque	0.701998	5.96408e-26	Macaque	0.801264	1.28448e-13	Macaque	0.508297	0.00110883	Macaque				0.608725	0.00145185	Macaque							FALSE
MXD4	0.527903	0.000210332	Macaque																						FALSE
MXI1	1.2204	1.35293e-21	Macaque	0.380431	0.00498799	Macaque				0.662567	5.26517e-05	Macaque	1.51577	0.0156145	Macaque	1.13155	4.07273e-15	Macaque							FALSE
MXRA8	0.829619	2.843e-12	Macaque	0.809832	1.08468e-28	Macaque				0.759464	2.2351e-10	Macaque				0.786861	6.46749e-06	Macaque							FALSE
MYCBP2	1.41803	1.35059e-41	Macaque	0.93889	9.80754e-67	Macaque				1.43835	4.51567e-30	Macaque	1.96093	3.59233e-07	Macaque	1.36567	2.2686e-30	Macaque							FALSE
MYEF2	0.579195	0.000106263	Macaque	0.672763	2.47001e-16	Macaque				0.779073	4.98582e-07	Macaque				0.750626	4.05611e-05	Macaque							FALSE
MYH10	0.975628	1.42786e-16	Macaque																						FALSE
MYL12B				0.454631	1.30943e-21	Human	0.47314	1.2407e-14	Human	0.427163	0.0336025	Human													TRUE
MYL6	1.74797	1.56433e-64	Human	1.55978	5.80423e-209	Human	0.871361	1.39792e-43	Human	1.40283	1.93337e-50	Human	2.35822	8.87387e-12	Human	2.00587	1.18887e-80	Human	1.27007	6.59101e-07	Human	1.66798	0.00179298	Human	TRUE
MYO18A	0.683484	6.60336e-09	Macaque	0.70198	1.02606e-26	Macaque				0.718826	1.7065e-10	Macaque				0.685244	2.34241e-05	Macaque							FALSE
MYO5A	0.92906	3.84408e-14	Macaque	0.71176	6.31961e-21	Macaque				0.82461	1.43187e-09	Macaque				0.812687	5.04523e-06	Macaque							FALSE
MYO9A	0.977862	3.15084e-16	Macaque	0.804891	1.14248e-16	Macaque				0.927412	1.22479e-11	Macaque	1.60535	0.00924167	Macaque	0.887208	2.21645e-07	Macaque							FALSE
MYSM1	0.643425	4.81674e-07	Macaque	0.618835	1.4411e-18	Macaque				0.741241	1.69195e-08	Macaque													TRUE
MYT1	0.641639	9.19929e-06	Macaque	0.492904	2.25197e-09	Macaque				0.920071	6.44263e-13	Macaque				0.717695	0.000425597	Macaque							FALSE
MYT1L	0.871179	9.02537e-15	Macaque	0.851467	8.15965e-38	Macaque				0.876951	3.92076e-10	Macaque				1.05863	2.91179e-13	Macaque							FALSE
MZT2B	1.26606	6.58142e-23	Human	2.0161	4.95951e-254	Human	0.965702	1.71896e-36	Human	1.88016	1.47596e-60	Human				2.39077	2.96367e-71	Human	1.52459	4.1352e-08	Human	2.79592	6.98957e-05	Human	TRUE
N4BP1	0.98468	1.01609e-15	Macaque	0.440074	3.56241e-06	Macaque				0.658443	2.16504e-07	Macaque				0.84261	1.65592e-05	Macaque							FALSE
N4BP2	0.880002	1.9052e-10	Macaque																						FALSE
N4BP2L2	0.755595	4.52787e-06	Human	0.775288	5.38497e-55	Human	0.812913	3.19096e-27	Human	0.997157	8.0824e-17	Human				1.00168	4.59843e-14	Human							FALSE
NAA15	0.479505	0.00529894	Macaque							0.574321	0.00102725	Macaque													FALSE
NAA16	0.493413	0.00714405	Macaque	0.457174	0.0251655	Macaque																			TRUE
NAA20	0.494248	0.00072251	Macaque	0.412304	0.00595177	Macaque				0.678294	0.00865833	Macaque													FALSE
NAA25	0.547998	2.35974e-06	Macaque													0.520217	0.0434468	Macaque							TRUE
NAA35	0.541367	1.42867e-05	Macaque	0.425515	0.000355476	Macaque				0.607535	0.0008456	Macaque													FALSE
NAA38	0.724922	6.24063e-05	Human	0.499515	5.47791e-22	Human	0.329594	6.96661e-09	Human	0.546376	0.000185838	Human													FALSE
NACA	0.642751	7.2591e-26	Human	1.08223	8.48897e-239	Human	0.618733	5.93554e-62	Human	0.75825	3.62881e-42	Human				0.463262	3.45286e-12	Human	1.09938	7.19185e-09	Human				FALSE
NAP1L1	0.859032	1.95874e-07	Human	0.866747	4.94346e-64	Human	0.667879	9.93297e-27	Human	0.751987	6.56653e-10	Human				0.829504	1.6187e-09	Human							FALSE
NAP1L4	0.899094	2.74038e-17	Macaque	0.575913	2.27035e-15	Macaque				0.724463	9.2832e-09	Macaque				0.612315	0.00219591	Macaque							FALSE
NAP1L5				0.384054	0.00138294	Macaque	0.602761	9.80247e-05	Macaque																FALSE
NAPA										0.27407	0.0293851	Human													FALSE
NARF							0.499845	3.88682e-11	Human																TRUE
NASP	0.73696	1.13187e-09	Macaque	0.399619	0.000168891	Macaque				0.649111	3.50306e-05	Macaque													FALSE
NAV1	1.29968	3.70095e-28	Macaque	1.46254	6.39067e-99	Macaque	0.87459	2.04898e-12	Macaque	1.5137	1.24356e-34	Macaque				1.57468	3.16955e-29	Macaque	1.66695	6.24591e-05	Macaque	1.8636	0.0168354	Macaque	FALSE
NAV2	0.810799	5.51506e-08	Macaque	0.521287	1.56101e-11	Macaque				1.1752	4.21591e-14	Macaque													FALSE
NAV3	1.45168	5.20806e-32	Macaque	1.31767	2.6044e-71	Macaque	0.886127	1.86153e-12	Macaque	1.30329	2.4439e-25	Macaque	1.83038	6.80737e-05	Macaque	1.19088	5.75058e-14	Macaque							FALSE
NBEA	0.757325	9.53302e-11	Macaque							0.817878	2.39739e-09	Macaque													FALSE
NBEAL1				0.334026	2.75782e-13	Human	0.298402	1.66495e-07	Human	0.69043	4.01798e-07	Human													FALSE
NBR1	0.358878	0.0354986	Macaque	0.432602	1.17797e-07	Macaque																			FALSE
NCAM1	1.25677	9.70903e-45	Macaque	1.22886	6.91923e-125	Macaque	0.48493	9.58753e-06	Macaque	1.41069	4.21273e-50	Macaque	1.95292	4.06836e-10	Macaque	1.37277	7.1192e-39	Macaque				1.91351	0.000101045	Macaque	FALSE
NCAM2	0.535271	0.00356837	Macaque							0.603294	5.72411e-05	Macaque													FALSE
NCAN	1.09795	3.89142e-21	Macaque	1.04688	1.74751e-52	Macaque	0.861007	1.58404e-12	Macaque	1.1475	3.10667e-20	Macaque				1.22485	3.13877e-19	Macaque							FALSE
NCBP1										0.740425	1.40789e-09	Macaque													FALSE
NCDN	0.642739	2.27754e-07	Macaque							0.425111	0.0191512	Macaque													FALSE
NCK2	0.4308	0.0181989	Macaque				0.434894	3.84462e-06	Human							0.563815	0.00200406	Macaque							FALSE
NCL							0.250373	0.00149054	Human																FALSE
NCOA1	1.03855	8.77367e-16	Macaque	0.791572	1.38238e-23	Macaque				1.33275	1.72176e-23	Macaque				0.925206	5.1075e-08	Macaque							FALSE
NCOA2	1.14021	6.65456e-20	Macaque	0.712423	1.01089e-18	Macaque				0.89794	1.75059e-10	Macaque				0.797948	3.16037e-05	Macaque							FALSE
NCOA3	1.1822	6.99257e-21	Macaque	1.20821	2.10902e-68	Macaque	1.0172	2.77827e-19	Macaque	1.27921	8.36586e-20	Macaque				1.33779	6.54995e-23	Macaque							TRUE
NCOA5	0.485329	9.46415e-05	Macaque							0.548561	0.0294088	Macaque													FALSE
NCOA6	0.644617	9.54882e-07	Macaque	0.624665	9.67498e-13	Macaque				0.751312	2.84505e-09	Macaque				0.542239	0.0492898	Macaque							FALSE
NCOR1	0.60028	0.000543627	Macaque	0.481426	7.29806e-11	Macaque				0.750463	9.91726e-06	Macaque													FALSE
NCOR2				0.470828	1.01679e-08	Macaque				0.5253	0.00252461	Macaque				0.917043	6.19099e-07	Macaque							FALSE
NCS1	0.674612	4.26964e-09	Macaque	0.426464	0.0157041	Macaque	0.330211	0.0126074	Human	0.974051	1.23546e-16	Macaque				0.586998	0.0383839	Macaque							FALSE
NDFIP1							0.702593	1.84766e-10	Macaque	0.543268	0.0089498	Macaque													FALSE
NDN	1.03948	6.76427e-20	Macaque	0.535042	2.4531e-14	Macaque	0.692477	1.37991e-10	Macaque							0.616418	0.0021907	Macaque							FALSE
NDRG2				0.323216	4.43733e-07	Human																			FALSE
NDRG3	0.54018	0.000825418	Macaque	0.324371	0.00362125	Macaque																			FALSE
NDRG4										0.501089	0.031582	Macaque													FALSE
NDUFA1				0.495116	7.3387e-12	Macaque	0.458977	0.0124163	Macaque							0.906718	1.71645e-13	Macaque							FALSE
NDUFA11							0.589932	0.000152592	Macaque																FALSE
NDUFA13	0.897242	6.44666e-18	Human	0.517503	5.49297e-29	Human							1.88929	0.00217126	Human	0.564753	0.0149074	Human							TRUE
NDUFA3																0.754616	1.83673e-08	Macaque							FALSE
NDUFA4	0.88377	2.92181e-23	Human	0.464796	7.10674e-46	Human	0.547344	4.87092e-25	Human	0.786047	6.32205e-25	Human													TRUE
NDUFA5	0.840318	1.09917e-11	Human	0.274652	1.58674e-13	Human				0.458825	0.00739295	Human													FALSE
NDUFAB1							0.607546	4.71848e-07	Macaque																FALSE
NDUFAF2							0.380566	9.11829e-07	Human																FALSE
NDUFAF3				0.441513	0.00461615	Macaque	0.66741	7.52983e-05	Macaque																FALSE
NDUFAF5							0.267987	0.00385556	Human																FALSE
NDUFB1	0.619525	2.10971e-09	Macaque	0.961427	3.15976e-58	Macaque										1.43213	2.3118e-32	Macaque							FALSE
NDUFB10							0.461303	0.000262946	Macaque																FALSE
NDUFB11	1.4675	1.59625e-42	Human	0.770845	2.78602e-73	Human	0.81401	1.31152e-37	Human	1.36813	5.90026e-44	Human	1.4221	0.0115001	Human										TRUE
NDUFB2				0.577003	3.79028e-13	Macaque										0.912287	3.35512e-12	Macaque							FALSE
NDUFB3	0.951158	3.09263e-13	Human	0.701251	1.34402e-45	Human	0.744568	4.88296e-25	Human	0.768257	5.11211e-11	Human				0.506503	0.00209445	Human							FALSE
NDUFB4				0.626471	1.50398e-22	Macaque										0.982155	2.05486e-16	Macaque							FALSE
NDUFB5	0.490043	0.015547	Macaque				0.802064	5.33291e-09	Macaque																FALSE
NDUFB6				0.48585	4.55615e-07	Macaque	0.570329	0.00242106	Macaque							0.681741	0.0011221	Macaque							FALSE
NDUFB8	1.47081	2.79685e-31	Human	1.03799	7.33803e-102	Human	0.598332	1.32098e-20	Human	0.938812	2.96655e-21	Human	1.66931	0.0166391	Human	0.943776	4.28644e-15	Human							FALSE
NDUFB9				0.533281	6.41922e-10	Macaque										0.655282	3.33057e-05	Macaque							FALSE
NDUFC1							0.28407	2.80064e-06	Human																TRUE
NDUFS3				0.544512	4.07478e-06	Macaque	0.759027	3.14854e-07	Macaque																FALSE
NDUFS4				0.375354	0.00682769	Macaque	0.632447	6.49529e-09	Macaque																FALSE
NDUFS5	0.446496	0.0257715	Human							0.722712	3.62314e-18	Human				0.484555	0.00781845	Macaque							FALSE
NDUFS8				0.541947	1.42739e-10	Macaque																			FALSE
NDUFV1							0.327146	0.0058837	Human																TRUE
NDUFV2	0.82231	5.36842e-07	Human	0.927126	3.46876e-70	Human	1.01126	1.57512e-41	Human	0.688894	1.73119e-11	Human				0.470918	0.018649	Human	1.16333	0.0273357	Human				FALSE
NDUFV3				0.52481	7.3884e-06	Macaque										0.700292	0.000175565	Macaque							FALSE
NEDD4L	0.855274	5.64146e-10	Macaque	0.478734	0.000120331	Macaque																			FALSE
NEDD8	0.511362	0.0418892	Human							0.343156	0.0416518	Human													FALSE
NEGR1	0.539693	1.17341e-05	Macaque							0.763297	0.00287966	Macaque													FALSE
NELFB	0.470092	1.42631e-05	Macaque																						FALSE
NELFCD				0.223337	2.95685e-06	Human																			FALSE
NELL1										0.52892	0.00230735	Macaque													TRUE
NELL2	0.483926	0.0277839	Human	0.426827	6.02779e-25	Human																			FALSE
NENF				0.66842	5.27834e-37	Human				0.81859	1.16151e-10	Human				0.963928	9.51896e-12	Human							TRUE
NEO1	0.512859	0.000119505	Macaque																						FALSE
NES							0.330978	0.00267249	Human																FALSE
NETO2	1.21248	8.2761e-24	Macaque																						FALSE
NEUROD2	0.716564	5.91845e-08	Human							0.556711	1.74631e-06	Human													FALSE
NEUROD6	1.02818	1.62234e-14	Human				0.738006	4.44801e-23	Human	0.804897	8.03234e-13	Human													FALSE
NF2	0.431859	0.00519554	Macaque	0.757411	1.14067e-27	Macaque				0.556784	2.06434e-07	Macaque				0.789651	1.09616e-06	Macaque							FALSE
NFASC	0.7151	3.84837e-05	Macaque	0.552117	5.99844e-13	Macaque				1.07345	1.92248e-13	Macaque													FALSE
NFAT5	1.19793	1.21974e-22	Macaque	1.27271	1.77494e-74	Macaque	0.616473	1.80135e-05	Macaque	1.70178	2.54281e-37	Macaque				1.33899	4.0578e-19	Macaque							FALSE
NFE2L1	0.499153	0.000255333	Macaque	0.440504	5.58247e-06	Macaque				0.825751	6.2295e-11	Macaque													FALSE
NFIA																1.47258	0.000621317	Macaque							FALSE
NFIB																0.775573	2.89724e-07	Macaque							FALSE
NFIL3	0.597764	1.10407e-06	Macaque							0.451661	0.00543664	Macaque				0.6253	0.00123607	Macaque							FALSE
NFIX										0.508542	0.000610709	Human													FALSE
NFYB				0.281502	3.00614e-11	Human	0.31256	0.00355781	Human							0.625767	0.0100369	Human							FALSE
NGRN							1.19202	1.78844e-17	Macaque	0.967277	0.0371966	Macaque													FALSE
NHLRC2	0.610379	1.21857e-07	Macaque							0.475954	0.00461124	Macaque													FALSE
NHLRC3				0.689025	9.32141e-41	Human	0.68429	3.01173e-18	Human	0.695685	1.03313e-06	Human				0.658023	1.17666e-06	Human							FALSE
NHP2	1.05328	1.16711e-17	Human	0.564276	1.61969e-32	Human	0.394083	7.18732e-16	Human	0.339157	0.00900829	Human				0.580965	0.000891247	Human	0.889201	0.0499721	Human				FALSE
NIFK	0.616757	8.67151e-06	Macaque													0.725581	0.000287501	Macaque							FALSE
NIN	0.767582	1.10035e-09	Macaque	0.653561	2.40317e-14	Macaque				0.553617	0.00156697	Macaque													FALSE
NINL	0.497725	0.000554911	Macaque							0.66146	6.65602e-05	Macaque													FALSE
NIP7	0.498857	0.00564107	Macaque	0.38718	0.00841858	Macaque				0.466781	0.015518	Macaque													FALSE
NIPA1	0.773047	1.3308e-12	Macaque	0.646172	3.56839e-23	Macaque				0.732376	1.43322e-10	Macaque													FALSE
NIPBL	1.02255	2.63062e-16	Macaque	0.851327	5.91042e-33	Macaque				1.14989	8.12999e-21	Macaque													FALSE
NISCH										0.411936	0.0304097	Macaque													FALSE
NKAIN1	0.560727	1.12385e-05	Macaque	0.613634	1.28721e-16	Macaque				0.532651	5.54112e-06	Macaque				1.07874	4.04909e-15	Macaque							FALSE
NKAIN2																0.77424	1.13811e-07	Macaque							TRUE
NKAIN3				0.434426	2.32842e-14	Human																			TRUE
NKAIN4							0.607223	0.00283482	Macaque																TRUE
NKIRAS1	0.535883	6.25544e-05	Macaque																						FALSE
NKIRAS2	0.901807	1.27743e-09	Human	0.727882	3.62639e-48	Human	0.452545	2.78106e-10	Human	0.502321	4.53659e-05	Human				0.810745	1.17732e-10	Human	1.3693	0.0169322	Human				FALSE
NKTR							0.265349	0.000360639	Human																TRUE
NKX2-1				0.918707	7.97102e-30	Human										1.49016	8.56751e-26	Human							FALSE
NLGN2										0.531881	0.00840633	Macaque													FALSE
NLRP1				1.45949	1.03038e-139	Human	1.45907	2.63311e-58	Human	1.48459	1.67449e-30	Human				1.41839	4.2108e-29	Human	1.46552	0.000391205	Human				FALSE
NME1							0.662292	7.08532e-18	Human	0.648318	4.37758e-08	Human													FALSE
NME2							1.46855	5.62601e-29	Macaque	1.48025	1.18381e-11	Macaque													FALSE
NME6	0.582865	9.53403e-05	Macaque	0.40178	1.73107e-05	Macaque	0.572701	0.000449221	Macaque	0.686205	3.57817e-06	Macaque													TRUE
NMNAT2	0.826409	1.13461e-14	Macaque	0.639634	1.58724e-11	Macaque				0.715711	8.32411e-07	Macaque				0.725924	1.31204e-05	Macaque							FALSE
NMT1										0.658557	1.66842e-05	Macaque													FALSE
NNAT	1.41082	2.51513e-66	Human	1.24972	4.15614e-226	Human	0.472186	2.09236e-28	Human	1.08533	4.89515e-52	Human	2.71203	1.23568e-14	Human	1.69467	4.1394e-74	Human	1.07	0.000116638	Human	1.67986	0.000358112	Human	FALSE
NOC2L	0.64136	1.82721e-05	Human	0.549197	5.3448e-28	Human	0.518959	9.39429e-14	Human	0.562822	9.47442e-05	Human				0.708819	1.4991e-07	Human							FALSE
NOL4	0.524391	1.3659e-05	Macaque							0.51357	0.0207607	Macaque													FALSE
NOL4L				0.834924	1.15449e-22	Macaque				0.833108	6.77076e-09	Macaque				0.711932	0.000346132	Macaque							FALSE
NOL8	0.530321	0.0007397	Macaque																						FALSE
NOL9	0.45637	0.000151277	Macaque							0.486713	0.00670774	Macaque													FALSE
NOM1	0.88877	2.87397e-12	Macaque	0.638096	3.44056e-17	Macaque				0.638591	4.3532e-07	Macaque				0.506291	0.00881852	Macaque							FALSE
NONO	0.457331	0.00266462	Macaque	0.818524	2.02353e-35	Macaque	0.619909	0.000702414	Macaque	0.818377	1.64177e-09	Macaque				0.618299	0.000701829	Macaque							FALSE
NOP10				0.60314	9.61782e-15	Macaque	0.795908	6.88663e-12	Macaque							0.6985	0.00100448	Macaque							FALSE
NOVA1										0.687479	0.0236945	Macaque				0.819889	0.000225879	Macaque							FALSE
NOVA2	1.46596	4.16139e-30	Macaque	1.22971	4.43885e-67	Macaque				1.40768	5.8245e-28	Macaque	1.79193	0.00880326	Macaque	1.78773	8.22232e-37	Macaque							FALSE
NPAS1							0.638928	3.44725e-13	Human										1.55164	0.00060717	Human				FALSE
NPAS3	1.17839	4.30067e-20	Macaque	0.769389	7.87958e-24	Macaque				1.22944	1.77477e-17	Macaque				1.07996	1.00095e-13	Macaque							FALSE
NPDC1	0.811938	3.69796e-12	Human	0.927034	2.67897e-75	Human	0.457285	3.6686e-11	Human	0.618499	1.13682e-08	Human				1.15413	3.92735e-19	Human	1.46351	0.00162158	Human				FALSE
NPEPPS	0.724656	3.7683e-08	Macaque	0.660028	5.19619e-12	Macaque				0.874618	1.45919e-09	Macaque				0.991528	2.66806e-10	Macaque							FALSE
NPM1	1.43027	4.84965e-35	Human	1.44007	5.98082e-194	Human	1.76542	9.97143e-135	Human	0.971268	1.40725e-27	Human	1.55191	3.509e-05	Human	1.23915	1.48886e-32	Human	1.76731	3.26551e-11	Human				FALSE
NPPA																0.630916	0.00122817	Human							TRUE
NPTN	0.632699	8.09263e-11	Macaque							0.453271	0.00867998	Macaque													FALSE
NPY										1.9053	7.68958e-05	Human	2.32134	0.0102134	Macaque	1.48125	6.90027e-11	Macaque							TRUE
NR2C2	0.6042	3.19693e-07	Macaque							0.588627	1.43729e-06	Macaque													FALSE
NR2F1	0.75525	1.37967e-07	Macaque	0.85732	6.45318e-20	Macaque				0.878696	1.69182e-08	Macaque				0.995303	4.12435e-07	Macaque							FALSE
NR2F2																			1.60571	0.00611049	Human				FALSE
NRAS	0.421029	0.0206161	Macaque	0.469825	6.66029e-08	Macaque				0.600554	0.00358726	Macaque				0.767946	1.38861e-05	Macaque							FALSE
NRCAM	0.509732	0.0258237	Macaque																						TRUE
NRDE2							0.417449	2.68517e-08	Human																TRUE
NREP				0.486999	4.15325e-23	Macaque	0.702303	1.0323e-28	Macaque	0.534342	0.0135988	Macaque				0.88128	6.5047e-19	Macaque							FALSE
NRIP1	1.15381	1.38859e-17	Macaque	0.903919	1.27952e-31	Macaque				0.767594	6.06691e-10	Macaque	1.46689	0.0280724	Macaque	1.40483	1.4129e-22	Macaque							FALSE
NRSN1										0.675977	5.7163e-05	Macaque													FALSE
NRXN1	1.86012	1.4521e-53	Macaque	1.00736	8.99936e-82	Macaque				1.68632	5.27456e-37	Macaque	1.57636	0.00583601	Macaque	1.51652	4.17464e-31	Macaque							FALSE
NRXN2	1.15807	6.24444e-19	Macaque	1.08462	3.21971e-50	Macaque				1.1818	4.71277e-17	Macaque	1.38215	0.0191396	Macaque	1.61169	2.3621e-26	Macaque							FALSE
NRXN3	2.01051	7.07847e-58	Macaque	1.44604	4.36267e-125	Macaque	0.897944	4.50464e-16	Macaque	2.08254	1.19273e-58	Macaque	2.37356	4.73249e-09	Macaque	1.72901	1.39926e-39	Macaque							FALSE
NSA2	0.436422	0.029077	Macaque				0.326132	1.35553e-07	Human							0.917463	2.8762e-11	Macaque							FALSE
NSD1	0.67062	1.49884e-08	Macaque	0.414204	0.00454886	Macaque																			FALSE
NSL1				0.297734	2.92586e-11	Human										0.606865	0.000368993	Human							FALSE
NSRP1				0.41693	0.00358293	Macaque																			FALSE
NSUN6				0.493824	8.11979e-28	Human	0.564536	1.46175e-16	Human	0.559189	3.9929e-06	Human													TRUE
NT5DC2	0.556459	0.000105511	Macaque				0.409396	0.000398939	Human																FALSE
NTM							0.549784	3.57842e-11	Human																FALSE
NTMT1				0.294663	4.60582e-12	Human	0.236221	7.01213e-05	Human																FALSE
NTN4	0.930338	6.03236e-14	Macaque	0.401607	8.50806e-05	Macaque	0.584808	0.0380067	Macaque	0.645616	0.000487761	Macaque													FALSE
NTRK2	1.40834	9.32224e-29	Macaque	0.979774	3.68597e-50	Macaque	0.604493	0.000144091	Macaque	1.30738	2.35121e-21	Macaque				0.942257	2.87614e-10	Macaque							FALSE
NUAK1				0.361066	0.0108028	Macaque																			FALSE
NUBP2							0.371562	0.00100259	Human																FALSE
NUCKS1	1.08335	7.69249e-30	Macaque	0.991683	2.21733e-68	Macaque	0.517015	1.0461e-06	Macaque	0.900583	9.61006e-16	Macaque				1.45451	4.55677e-31	Macaque	1.23969	0.00178999	Macaque				FALSE
NUDC				0.461112	6.56425e-06	Macaque																			FALSE
NUDCD3	0.497693	0.00037506	Macaque	0.531823	1.5578e-07	Macaque				0.746698	6.05798e-06	Macaque				0.734921	6.29354e-06	Macaque							FALSE
NUDT1				0.281994	5.61139e-07	Human																			FALSE
NUDT10																0.552079	0.000178744	Human							TRUE
NUDT3	1.08981	1.46095e-15	Human	1.34607	7.56875e-131	Human	1.39183	2.11363e-69	Human	1.23252	5.6467e-24	Human				0.829693	4.24517e-11	Human	1.27558	0.00409778	Human				FALSE
NUDT4				0.337941	1.83516e-11	Human										0.542365	0.0114367	Human	1.15866	0.0261579	Human				FALSE
NUDT5				0.384035	2.80733e-15	Human	0.40743	1.67556e-08	Human							0.689669	1.02805e-06	Human							FALSE
NUDT9	0.597164	6.99603e-06	Macaque	0.582096	9.55154e-12	Macaque	0.724818	1.74017e-06	Macaque							0.657441	0.0104356	Macaque							TRUE
NUFIP1	0.47518	0.00607545	Macaque	0.405413	2.25148e-05	Macaque																			FALSE
NUFIP2	0.818419	3.74636e-10	Macaque	0.40914	0.0344506	Macaque				0.794387	1.49724e-09	Macaque				0.842645	5.27584e-06	Macaque							FALSE
NUMA1				0.271857	0.000290704	Human	0.340533	0.000378599	Human																FALSE
NUP153	0.405986	0.000829429	Macaque																						FALSE
NUP160				0.618769	3.83888e-40	Human	0.780024	3.3447e-23	Human							0.676735	8.51256e-06	Human							FALSE
NUP214										0.440161	0.00767564	Macaque													FALSE
NUP93	1.13995	5.96614e-22	Macaque	1.20859	9.53642e-62	Macaque	1.37937	2.66094e-42	Macaque	1.12195	3.41024e-17	Macaque				0.693265	0.0103681	Macaque				1.94449	0.0434099	Macaque	FALSE
NXPH2	1.1384	9.28061e-23	Macaque	0.939007	8.03404e-37	Macaque	1.02919	3.0078e-21	Macaque	1.11873	3.42205e-13	Macaque													FALSE
NXT1				0.42305	6.79207e-18	Human				0.50261	0.000797904	Human													FALSE
NYAP2	0.391506	0.0161633	Macaque										1.49015	0.0206999	Macaque										FALSE
OAZ1							0.366959	0.00211029	Macaque																FALSE
OAZ2							0.71444	1.87074e-08	Macaque																FALSE
OCIAD2	1.09586	9.87451e-15	Human	0.771162	1.91184e-56	Human	1.15319	2.44181e-51	Human	1.06295	8.25941e-19	Human				0.890091	3.63605e-13	Human							TRUE
ODC1	0.630896	2.64828e-06	Macaque																						FALSE
ODF2L				0.717435	3.26363e-37	Human	0.746488	7.47368e-24	Human	0.63913	0.000148536	Human				0.633413	0.000133703	Human							FALSE
OGT	1.17805	5.86835e-21	Macaque	0.723932	1.89345e-21	Macaque	0.624974	1.47567e-05	Macaque	1.38976	1.16461e-28	Macaque				0.785325	2.30124e-06	Macaque							FALSE
OLA1				0.39236	1.78269e-12	Human										0.623046	0.0022281	Human							FALSE
OLFM1	0.974708	3.77537e-14	Macaque	0.784152	1.14551e-26	Macaque				0.616551	6.88609e-05	Macaque				1.24338	9.11472e-18	Macaque							FALSE
OLFM2	0.788928	3.18741e-12	Macaque	0.652039	8.57163e-19	Macaque				0.498316	0.00044213	Macaque													FALSE
OPA1	0.41865	0.0162631	Macaque	0.421164	0.0470896	Macaque				0.49427	0.000521049	Macaque													FALSE
OPHN1	0.649054	6.38833e-07	Macaque	0.625837	1.99869e-16	Macaque				0.714696	1.93406e-06	Macaque				0.721808	0.000282093	Macaque							FALSE
OPN3				0.981785	4.59115e-81	Human	0.966761	1.76205e-32	Human																TRUE
OPTN				0.433697	9.10042e-18	Human	0.303094	0.00245451	Human																TRUE
ORC2	0.500806	1.62238e-05	Macaque																						TRUE
ORMDL1	0.877882	1.75612e-06	Human	0.723608	5.14056e-52	Human	0.619806	8.10028e-16	Human	0.794743	1.75643e-09	Human				0.922994	4.51562e-10	Human							FALSE
OSBP	0.563202	2.44713e-07	Macaque							0.599834	8.01412e-08	Macaque				0.59857	8.78242e-05	Macaque							FALSE
OSBPL11	0.784067	1.72862e-09	Macaque	0.689457	3.20379e-18	Macaque	0.773961	1.24219e-15	Macaque	0.88961	3.2359e-13	Macaque				0.661977	0.00130567	Macaque							FALSE
OSBPL6										0.545718	0.000329563	Macaque													TRUE
OSBPL9	0.8201	1.61219e-10	Macaque	0.61258	2.93484e-14	Macaque	0.614717	0.000866517	Macaque	0.820773	7.84717e-08	Macaque													TRUE
OSTC				0.493855	2.6174e-23	Human	0.347831	9.07299e-06	Human																FALSE
OTUB1				0.790906	3.71933e-26	Macaque	0.746408	5.21172e-10	Macaque	0.747081	3.03177e-05	Macaque				0.592808	0.0131652	Macaque							FALSE
OTUD3	0.49227	0.0370525	Macaque																						FALSE
OTUD4	0.517648	4.24003e-05	Macaque							0.443501	0.000189893	Macaque													FALSE
OTUD5	0.369235	0.00475766	Macaque																						FALSE
OTULIN	0.687742	3.42962e-08	Macaque	0.595809	1.83202e-17	Macaque				0.558999	0.000186084	Macaque				0.704438	1.75989e-05	Macaque							TRUE
OXA1L	0.489236	0.000871479	Macaque	0.655986	2.14906e-19	Macaque	0.781777	1.72307e-09	Macaque	0.619869	0.00060772	Macaque													FALSE
P4HTM	0.753181	1.81171e-12	Macaque	0.62439	2.52887e-19	Macaque				0.862128	1.02696e-09	Macaque													TRUE
PA2G4							0.238193	0.0128332	Human																FALSE
PABPC1				0.583492	4.80864e-37	Human																			FALSE
PABPC4	0.962419	6.52745e-16	Macaque	0.676365	3.67938e-18	Macaque				1.03846	1.71177e-16	Macaque				0.615843	0.0227007	Macaque							FALSE
PABPN1	1.02509	6.61844e-17	Macaque	0.433145	3.78315e-06	Macaque				0.942251	1.85886e-13	Macaque													FALSE
PACS2	0.452294	0.00380123	Macaque							0.397684	0.0223294	Macaque													FALSE
PAFAH1B1	0.928266	3.73345e-18	Macaque	0.544383	2.70198e-13	Macaque				0.659283	5.77864e-06	Macaque													FALSE
PAFAH1B2	0.833738	1.86909e-11	Macaque	1.03506	2.41636e-46	Macaque	0.833857	3.88815e-13	Macaque	1.10015	1.81507e-18	Macaque				1.3551	4.36576e-22	Macaque							FALSE
PAFAH1B3				0.260687	3.63306e-08	Macaque																			FALSE
PAICS	0.835563	4.33115e-11	Macaque	0.873198	1.59887e-33	Macaque				1.17507	4.73284e-21	Macaque				0.959747	4.31911e-11	Macaque							TRUE
PAIP2	0.633281	1.99738e-07	Human	0.663345	3.46949e-45	Human				0.460106	5.42196e-07	Human				1.05109	9.71355e-19	Human							FALSE
PAK2	0.924363	3.30598e-16	Macaque	0.727679	3.77355e-34	Macaque	0.559014	6.36069e-05	Macaque	0.778982	4.91154e-11	Macaque	1.09389	0.0277039	Macaque	0.837209	8.51352e-10	Macaque							FALSE
PAK3	1.1445	1.61255e-23	Macaque	0.626999	1.52394e-14	Macaque	0.65099	2.21538e-05	Macaque	0.698544	6.32095e-06	Macaque	1.54194	0.0399464	Macaque	0.692487	0.00472792	Macaque							FALSE
PALM	0.771549	8.25928e-09	Macaque																						FALSE
PANK3	1.43184	1.09673e-32	Macaque	1.39997	1.16192e-96	Macaque	1.12358	1.68958e-25	Macaque	1.35389	2.82835e-28	Macaque				1.52859	5.14091e-30	Macaque							FALSE
PANX1	0.521811	3.80506e-06	Macaque																						FALSE
PAPOLG										0.556278	0.000144897	Macaque													FALSE
PAPSS1				0.268212	1.22057e-09	Human										0.587734	0.0231964	Human							FALSE
PARD3	0.617601	1.94735e-06	Macaque							0.491586	0.000491208	Macaque				0.600085	0.000683478	Macaque							FALSE
PARK7	0.741177	9.95513e-10	Human	0.319192	9.27977e-08	Human	0.743878	1.04592e-37	Human	0.802633	9.39734e-17	Human				0.519768	0.000154159	Human							FALSE
PARL				0.25599	1.15696e-09	Human																			FALSE
PARP6				0.42735	0.0125304	Macaque	0.600073	0.00171597	Macaque	0.598467	0.000151995	Macaque													FALSE
PARP8	0.582663	0.000124614	Macaque	0.483793	3.519e-08	Macaque																			FALSE
PATZ1	0.715912	7.5261e-06	Macaque	0.414427	0.00559069	Macaque																			FALSE
PAXBP1	1.38545	1.5903e-29	Macaque	0.659493	2.72595e-16	Macaque				0.914805	1.34182e-12	Macaque				0.680193	9.06353e-05	Macaque							TRUE
PBRM1	1.23048	8.64308e-27	Macaque	0.861813	2.20263e-38	Macaque	0.842473	1.31793e-12	Macaque	1.17963	3.70874e-20	Macaque													FALSE
PBX1	0.594312	0.00210422	Macaque	0.567602	8.48168e-08	Macaque										1.2145	5.95863e-21	Macaque							FALSE
PCBP1	0.701541	8.53634e-08	Human	1.31508	3.21374e-140	Human	0.736763	7.54233e-32	Human	0.586057	9.43921e-11	Human				1.62429	8.02041e-33	Human	1.80096	3.41982e-08	Human				FALSE
PCDH11X	0.79538	3.62024e-08	Human	0.726226	3.74053e-43	Human	0.637128	3.38814e-21	Human	0.642571	8.09193e-05	Human													FALSE
PCDH19	1.14422	4.02869e-20	Macaque	0.999398	3.25461e-39	Macaque				1.10291	6.39908e-16	Macaque													FALSE
PCDH8	0.901472	1.1678e-10	Macaque	0.963779	8.65384e-44	Macaque				0.983132	2.37525e-12	Macaque				0.86829	1.71573e-06	Macaque							FALSE
PCDH9	0.800962	2.654e-09	Macaque	0.812813	5.26199e-21	Macaque	0.642762	0.00043157	Macaque	1.01763	4.81113e-13	Macaque				0.8939	1.00494e-06	Macaque							FALSE
PCGF3	0.595286	1.01148e-05	Macaque	0.535065	9.18211e-10	Macaque				0.504324	0.00369939	Macaque				0.736665	3.70184e-06	Macaque							FALSE
PCLO							0.434239	2.35319e-07	Human																FALSE
PCMTD1	0.412972	0.0107799	Macaque																						TRUE
PCNP	0.692421	0.00283165	Human													0.496034	0.00992248	Human							FALSE
PCNT	0.550182	0.00010838	Macaque	0.337903	0.00783746	Macaque				0.594472	0.000244113	Macaque													FALSE
PCSK1N	0.587203	0.000716374	Human	0.304487	2.58884e-06	Human	0.362952	0.00119038	Human																FALSE
PCSK7							0.263868	0.0429229	Human																FALSE
PCYOX1	1.06014	5.24336e-16	Macaque	0.833374	1.06595e-28	Macaque	0.984251	9.47238e-16	Macaque	0.887317	4.54273e-09	Macaque				0.733614	0.000731724	Macaque							FALSE
PCYT1B	0.620908	2.65563e-07	Macaque	0.677579	7.51756e-24	Macaque				0.755348	3.86559e-10	Macaque				0.674733	0.000597751	Macaque							FALSE
PDCD6	0.656984	0.000905724	Human	0.847193	1.66889e-65	Human				0.554531	0.000279733	Human				0.887999	1.12008e-10	Human	1.06708	0.038413	Human				FALSE
PDCD6IP	0.634128	3.86755e-09	Macaque	0.567636	1.25643e-13	Macaque	0.587475	0.0006588	Macaque																TRUE
PDCD7	0.459383	0.000276043	Macaque	0.63661	1.29521e-36	Human	0.412226	4.73099e-06	Human																FALSE
PDCL3				0.337927	4.82934e-10	Human										0.605166	0.00132581	Human							FALSE
PDE4D	1.14287	9.6368e-21	Macaque	1.20408	1.24626e-65	Macaque	0.921775	8.33987e-12	Macaque	1.33154	2.09663e-25	Macaque	2.12165	0.00126177	Macaque	1.52577	3.25914e-24	Macaque							FALSE
PDGFD																0.962442	3.82879e-14	Human							TRUE
PDIA3	0.785924	2.95456e-06	Human	0.939781	8.60857e-66	Human	0.667386	5.18088e-21	Human	0.764234	2.85116e-10	Human				1.0588	3.53873e-16	Human							FALSE
PDIA6				0.784988	6.85017e-56	Human	0.5873	5.66848e-15	Human	0.69067	9.0372e-11	Human				1.28348	1.43109e-23	Human							FALSE
PDIK1L	0.511547	0.000168765	Macaque	0.407717	0.000961784	Macaque				0.51692	0.0106353	Macaque				0.610454	0.00151181	Macaque							FALSE
PDRG1	0.643443	4.76033e-07	Macaque	0.505476	2.35294e-06	Macaque																			TRUE
PDS5A	0.673055	1.87604e-07	Macaque	0.434781	3.76714e-10	Macaque																			FALSE
PDS5B	0.985979	1.1622e-15	Macaque	0.869233	1.66349e-37	Macaque	0.638993	0.00283538	Macaque	0.933905	1.64691e-07	Macaque				0.774501	4.00063e-06	Macaque							FALSE
PDZD4																0.692196	0.000101269	Macaque							FALSE
PDZD8	0.436164	0.0112295	Macaque	0.571356	1.05585e-16	Macaque				0.553907	0.00657115	Macaque				0.691669	0.000918095	Macaque							FALSE
PDZRN4				0.766682	1.44528e-43	Human	0.559182	1.38492e-10	Human							1.19433	7.48831e-18	Human							FALSE
PEA15				0.68018	3.67586e-38	Human				0.636634	8.02781e-05	Human													FALSE
PEBP1	1.07931	2.58211e-27	Human	1.19084	4.85626e-159	Human	1.48414	1.29272e-91	Human	1.23278	1.92725e-43	Human				0.607213	1.19757e-08	Human	1.05149	0.000213134	Human				FALSE
PEF1																0.470539	0.0267573	Human							FALSE
PEG10							0.626782	1.6896e-12	Human																FALSE
PEG3	1.36078	3.62553e-24	Macaque	0.782381	9.21342e-28	Macaque	1.32954	4.77131e-27	Macaque	1.55965	1.07991e-26	Macaque													FALSE
PELI1	0.403874	0.00834499	Macaque	0.652388	7.1368e-17	Macaque	0.685966	3.89145e-06	Macaque	0.789598	6.23951e-07	Macaque													FALSE
PELI2																0.804166	4.74717e-08	Macaque							TRUE
PELP1	0.410836	0.0317185	Macaque																						FALSE
PER2																0.73252	1.18785e-07	Macaque							FALSE
PFDN4	0.690761	0.000108866	Human																						TRUE
PFDN5	1.06928	2.33957e-39	Human	0.794806	1.88428e-88	Human	0.406915	1.43638e-17	Human	1.003	9.71458e-43	Human	1.37906	9.75642e-06	Human										FALSE
PFDN6	0.614661	7.76221e-06	Macaque	0.775902	7.39079e-26	Macaque	0.801585	5.08014e-10	Macaque	0.584185	0.00081582	Macaque				0.931503	2.25526e-08	Macaque							FALSE
PFKL							0.522947	0.00255987	Macaque																FALSE
PFKM							0.594526	0.0426007	Macaque																FALSE
PFN1	0.83958	2.97831e-05	Human	0.296447	9.08949e-12	Human				0.445164	0.0278153	Human													FALSE
PFN2							1.32493	2.40091e-77	Macaque							0.510061	7.88641e-09	Human							FALSE
PGAM1	1.36864	6.5784e-24	Human	1.21883	6.30175e-105	Human	1.07306	1.16217e-40	Human	1.43136	7.40595e-31	Human				1.19335	1.86848e-19	Human	1.28997	0.00385028	Human				FALSE
PGAP1	0.535185	0.000395816	Macaque	0.617701	6.163e-12	Macaque				0.656651	0.00107578	Macaque				0.678146	0.0222709	Macaque							FALSE
PGLS							0.568896	0.00171203	Macaque																FALSE
PGM2L1				0.685017	1.10367e-43	Human	0.623269	2.35227e-18	Human	0.696583	3.31559e-07	Human				0.631643	0.000636857	Human							FALSE
PGP							0.401995	1.13296e-05	Human																FALSE
PGRMC1	0.700761	3.82042e-09	Macaque	0.42185	0.00577401	Macaque	0.910973	2.67054e-20	Macaque							0.612059	0.0124841	Macaque							FALSE
PGRMC2	0.574785	1.62824e-05	Macaque																						FALSE
PHACTR3	0.982801	4.98683e-16	Macaque	0.870704	1.45283e-31	Macaque	0.959974	8.31442e-15	Macaque	1.00628	8.94333e-15	Macaque				0.978555	1.19558e-08	Macaque							FALSE
PHACTR4	0.780193	2.07753e-06	Macaque	0.632092	1.80399e-11	Macaque				0.651006	3.14407e-05	Macaque				0.879561	1.10584e-06	Macaque							FALSE
PHB	0.908275	1.64867e-10	Human	0.629403	3.71629e-42	Human	0.287636	6.8422e-07	Human							0.993842	1.01927e-11	Human							FALSE
PHB2				0.431055	1.29655e-17	Human	0.557004	8.55784e-10	Human																FALSE
PHC2	0.985264	5.43305e-16	Macaque	0.446185	0.00910228	Macaque				0.872321	4.70303e-14	Macaque	1.47754	0.0330902	Macaque	1.06462	1.07831e-10	Macaque							FALSE
PHC3	1.07711	4.96271e-16	Macaque	0.863631	1.26887e-37	Macaque	0.831639	4.76987e-13	Macaque	0.902108	6.98636e-10	Macaque				0.976147	4.50941e-09	Macaque							FALSE
PHF12	0.498034	2.02072e-05	Macaque	0.556511	7.57686e-16	Macaque																			FALSE
PHF14	0.476397	0.00417651	Macaque				0.472167	0.000500412	Macaque																FALSE
PHF2	0.465765	0.000974225	Macaque	0.494031	1.99543e-16	Macaque				0.525644	0.000308802	Macaque				0.618433	0.000164082	Macaque							FALSE
PHF20							0.244407	0.00465846	Human																FALSE
PHF20L1	0.685834	3.64848e-06	Macaque	0.597296	3.21126e-12	Macaque				1.10108	2.25816e-15	Macaque													FALSE
PHF21A	0.623343	6.94092e-05	Macaque	0.514511	1.10142e-09	Macaque	0.632893	2.80213e-07	Macaque	0.928245	1.79242e-12	Macaque													FALSE
PHF3	0.73737	2.57584e-08	Macaque	0.582247	5.30709e-10	Macaque				0.624785	0.00327922	Macaque													FALSE
PHF5A							0.931206	9.08738e-16	Macaque																FALSE
PHIP	0.63197	5.4063e-08	Macaque							0.637039	0.000528073	Macaque													TRUE
PHKB							0.317506	1.7378e-05	Human																FALSE
PHLDB1										0.383675	0.00680913	Macaque													FALSE
PHLPP1																0.768637	1.25575e-07	Macaque							FALSE
PHPT1	0.514406	0.00686305	Human																						FALSE
PHRF1	0.580935	2.90802e-05	Macaque							0.538693	9.15593e-05	Macaque													FALSE
PHYH	0.513633	9.90423e-05	Macaque	0.464979	4.24502e-05	Macaque	0.859963	1.18148e-15	Macaque																TRUE
PHYKPL																0.670097	8.44465e-05	Human							FALSE
PIANP										0.433765	0.00325869	Macaque													FALSE
PIAS2	0.820856	1.23323e-11	Macaque	0.771906	4.82729e-24	Macaque				0.814561	8.29811e-07	Macaque				0.962139	6.8576e-11	Macaque							FALSE
PIBF1				0.255027	2.08823e-07	Human	0.367868	4.15094e-05	Human																FALSE
PICALM	0.622983	6.96817e-06	Macaque	0.381107	9.75037e-05	Macaque																			FALSE
PID1				0.337764	1.32413e-08	Human																			FALSE
PIGT	0.545321	4.10116e-05	Macaque	0.702406	5.64092e-19	Macaque				0.525629	0.0174436	Macaque													FALSE
PIK3C2A	0.480178	0.0104022	Macaque																						FALSE
PIK3C3				0.351864	0.0322781	Macaque																			TRUE
PIK3CA				0.402641	0.00769497	Macaque										0.519094	0.0153984	Macaque							FALSE
PIK3R3	0.672602	1.92262e-07	Macaque	0.537273	2.46503e-11	Macaque				0.668049	2.13965e-06	Macaque													FALSE
PIKFYVE	0.53362	4.77591e-09	Macaque																						FALSE
PIN1							0.782288	3.89036e-12	Macaque																FALSE
PIN4				0.453522	3.99923e-27	Human	0.283729	7.74246e-05	Human	0.665512	1.20676e-09	Human													FALSE
PIP4K2B	0.606674	1.62792e-05	Macaque	0.581728	5.705e-16	Macaque				0.821692	4.42919e-12	Macaque				0.599727	0.00259129	Macaque							FALSE
PIP5K1A	0.503777	0.000221649	Macaque	0.467429	2.31351e-09	Macaque				0.515424	0.0191198	Macaque													FALSE
PITPNA	0.518271	9.70049e-07	Macaque																						FALSE
PITPNC1	1.26095	4.28841e-23	Macaque	1.02758	1.71137e-49	Macaque	0.869847	1.97939e-11	Macaque	1.45396	3.20561e-30	Macaque	1.48473	0.0261816	Macaque	1.01916	9.71967e-11	Macaque							FALSE
PJA1	0.494213	0.000346103	Macaque																						FALSE
PJA2	0.605176	2.2994e-06	Macaque																						FALSE
PKIA	0.662803	9.15544e-07	Macaque	0.816466	5.80536e-25	Macaque	0.533737	0.000581348	Macaque							1.07078	3.67745e-12	Macaque							FALSE
PKIG				0.288233	1.81534e-07	Human																			FALSE
PKN1	0.39855	0.0235946	Macaque																						FALSE
PKN2	0.854329	1.27793e-14	Macaque							0.517462	0.00820053	Macaque													FALSE
PLA2G12A				0.271674	1.48707e-09	Human																			FALSE
PLCB1	0.639788	6.71877e-07	Macaque							0.727922	2.35055e-06	Macaque													FALSE
PLCG1										0.648164	4.17389e-06	Macaque													FALSE
PLCG2				0.645334	8.73421e-46	Human																			FALSE
PLCL2	0.696124	6.64186e-08	Macaque	0.487234	5.12364e-10	Macaque				0.636876	1.36307e-06	Macaque				0.763984	8.22075e-07	Macaque							FALSE
PLEKHA3	0.612657	0.000159424	Macaque							0.535872	0.000247809	Macaque													FALSE
PLEKHA5	0.83168	1.39823e-13	Macaque	0.60456	4.14955e-11	Macaque				0.915179	1.00681e-10	Macaque													FALSE
PLEKHA8	0.496249	7.2145e-05	Macaque																						TRUE
PLEKHJ1				0.289532	6.79605e-10	Human	0.346435	0.000370541	Human																TRUE
PLEKHO1	1.27481	1.06514e-27	Macaque	0.510502	4.76359e-10	Macaque				0.74819	1.00166e-06	Macaque				1.06683	3.78899e-12	Macaque							FALSE
PLGRKT				0.696469	2.17479e-16	Macaque	0.676791	3.57266e-08	Macaque																TRUE
PLK2																0.708902	0.00018682	Human							FALSE
PLS3				0.457007	2.01542e-22	Human										0.840914	9.89215e-16	Human							FALSE
PLXNA1										0.492699	0.000658621	Macaque													FALSE
PLXNA2	1.11355	6.81616e-20	Macaque	0.695218	7.95702e-19	Macaque				0.68917	9.86611e-05	Macaque				1.00113	1.82532e-09	Macaque							FALSE
PLXNA3										0.496091	8.9645e-05	Macaque													FALSE
PLXNA4	0.539741	0.000224375	Macaque	0.493779	1.05393e-08	Macaque										0.891373	0.00395591	Macaque							FALSE
PM20D2	0.482992	0.000384368	Macaque							0.610951	0.000125615	Macaque													TRUE
PMEPA1							0.646934	4.97545e-17	Human							0.584329	0.0440344	Macaque							FALSE
PMM1				0.424088	3.96546e-22	Human	0.474167	3.20688e-10	Human	0.465777	0.0310866	Human				0.692078	1.00513e-05	Human							FALSE
PMVK	0.822222	5.49369e-06	Human	0.54849	2.23743e-29	Human	0.5175	1.03957e-12	Human	0.732204	8.56479e-08	Human				0.758058	2.24334e-08	Human							TRUE
PNISR	1.00074	3.12704e-24	Macaque	0.623575	1.44912e-27	Macaque	0.455327	0.000116948	Macaque	0.905377	5.37915e-16	Macaque	1.33752	0.00242095	Macaque										TRUE
PNKD				0.575803	5.374e-09	Macaque	0.763558	2.88329e-09	Macaque																FALSE
PNMA1	0.52995	0.0125146	Macaque							0.604977	0.0298926	Macaque													FALSE
PNN	1.01979	5.88406e-18	Macaque	0.433139	0.000181817	Macaque				0.841948	6.19021e-11	Macaque				0.549486	0.00664185	Human							FALSE
PNOC				0.417629	4.28877e-07	Human	1.12613	3.55229e-28	Human	0.557091	0.0278999	Human													FALSE
PNRC1	0.760051	6.67831e-12	Macaque				0.571417	1.72348e-05	Macaque							0.391411	0.00753694	Human							FALSE
PODXL2	0.701133	3.36447e-08	Macaque	0.541506	5.47428e-12	Macaque	0.544011	8.31074e-08	Macaque	0.544562	0.00059181	Macaque													FALSE
POGK	0.653052	1.33431e-06	Macaque	0.536877	1.79525e-08	Macaque				0.695953	3.65166e-05	Macaque				1.09685	6.24751e-15	Macaque							FALSE
POGZ	1.4488	8.52771e-37	Macaque	1.05744	2.52757e-51	Macaque				1.35638	7.27124e-23	Macaque				1.32061	1.59832e-19	Macaque				1.75462	0.0233024	Macaque	TRUE
POLA1										0.49363	0.00341476	Macaque													FALSE
POLB	0.830722	9.64081e-12	Macaque	0.787899	1.53618e-22	Macaque	1.01968	5.38614e-21	Macaque							0.791171	4.22323e-05	Macaque							FALSE
POLD2				0.415991	1.55494e-19	Human	0.407463	7.58794e-09	Human	0.451865	0.00297081	Human				0.678455	7.98124e-07	Human							TRUE
POLDIP2				0.475606	2.60221e-28	Human										0.640263	7.74283e-07	Human							FALSE
POLDIP3				0.384513	0.00529388	Macaque																			FALSE
POLK							0.391521	9.20909e-09	Human																FALSE
POLR1E	0.447267	0.00952093	Macaque																						TRUE
[truncated: 1,185 more rows]
