# Supplementary material for: Cortical arealization of interneurons defines shared and distinct molecular programs in developing human and macaque brains
Source: Research Square preprint supplement (doi:10.21203/rs.3.rs-3939272/v1), 2024-02-26
Supplement: Supplementary file 8 [file 9c4d9bf7c90eeac61059bd68.xlsx]

## Sheet: CTX
Table S4. List of the GO terms of DEGs for inIPCs in CTX and GE.
ONTOLOGY	ID	Description	GeneRatio	BgRatio	pvalue	p.adjust	qvalue	geneID	Count
BP	GO:0061564	axon development	39/278	490/18903	6.45385e-18	1.22e-14	9.6517e-15	APP/AUTS2/BMPR2/BRAF/CCK/CHL1/CNTN4/CTNNA2/DCC/DCLK1/DDR1/EFNB2/EPHA3/EXT1/FGF13/FYN/GLI3/GSK3B/IGF1R/ISL1/KALRN/KIF5C/MAP2/MAPT/NDN/NRXN1/NRXN3/PAK3/PARD3/PAX6/PTK2/PTN/PTPRS/RAPH1/ROBO1/ROBO2/TMEFF1/TRIO/UCHL1	39
BP	GO:0007409	axonogenesis	37/278	438/18903	6.95157e-18	1.22e-14	9.6517e-15	APP/AUTS2/BMPR2/BRAF/CCK/CHL1/CNTN4/CTNNA2/DCC/DCLK1/EFNB2/EPHA3/EXT1/FGF13/FYN/GLI3/GSK3B/IGF1R/ISL1/KALRN/KIF5C/MAP2/MAPT/NDN/NRXN1/NRXN3/PAK3/PARD3/PAX6/PTK2/PTPRS/RAPH1/ROBO1/ROBO2/TMEFF1/TRIO/UCHL1	37
BP	GO:0007411	axon guidance	21/278	236/18903	4.86428e-11	3.69783e-08	2.92544e-08	APP/BMPR2/CHL1/CNTN4/DCC/EFNB2/EPHA3/EXT1/FYN/GLI3/ISL1/KALRN/KIF5C/NRXN1/NRXN3/PAX6/PTK2/ROBO1/ROBO2/TMEFF1/TRIO	21
BP	GO:0016358	dendrite development	21/278	237/18903	5.26756e-11	3.69783e-08	2.92544e-08	APP/CAMK1D/CTNNA2/CTNND2/DCC/DCLK1/FYN/GRIP1/GSK3B/IL1RAPL1/MAP2/MEF2C/NLGN1/PAK3/PHACTR1/PTN/PTPRD/PTPRS/RERE/SDK1/TMEFF1	21
BP	GO:0097485	neuron projection guidance	21/278	237/18903	5.26756e-11	3.69783e-08	2.92544e-08	APP/BMPR2/CHL1/CNTN4/DCC/EFNB2/EPHA3/EXT1/FYN/GLI3/ISL1/KALRN/KIF5C/NRXN1/NRXN3/PAX6/PTK2/ROBO1/ROBO2/TMEFF1/TRIO	21
BP	GO:0030900	forebrain development	26/278	383/18903	1.00516e-10	5.8802e-08	4.65196e-08	APP/BTG2/DCLK1/ERBB4/EXT1/FGF13/FOXP2/FYN/GLI3/GSK3B/ID4/IGF1R/ISL1/NF1/NR2F2/NRG1/NRG3/PAX6/PHACTR1/PLCB1/ROBO1/ROBO2/SLC8A1/ZEB1/ZIC1/ZSWIM6	26
BP	GO:0010975	regulation of neuron projection development	27/278	446/18903	5.5757e-10	2.79582e-07	2.21184e-07	BMPR2/BRAF/CAMK1D/CBFA2T2/CTNNA2/DCC/EFNB2/EPHA3/FGF13/FUT9/FYN/GSK3B/IGF1R/IL1RAPL1/MAP2/MAPT/NLGN1/PAK3/PRKD1/PTN/PTPRD/PTPRG/PTPRS/ROBO1/ROBO2/VIM/ZNF804A	27
BP	GO:0001764	neuron migration	17/278	177/18903	1.09806e-09	4.70055e-07	3.71872e-07	AUTS2/CCK/CHL1/CTNNA2/DCC/DCLK1/DCX/FGF13/FYN/MEF2C/NDN/NR2F2/NRG1/NRG3/PAX6/PHACTR1/ZNF609	17
BP	GO:0021537	telencephalon development	20/278	255/18903	1.32937e-09	4.70055e-07	3.71872e-07	BTG2/ERBB4/EXT1/FGF13/FOXP2/GLI3/GSK3B/ID4/IGF1R/NF1/NRG1/NRG3/PAX6/PHACTR1/PLCB1/ROBO1/ROBO2/SLC8A1/ZIC1/ZSWIM6	20
BP	GO:0050808	synapse organization	26/278	432/18903	1.33919e-09	4.70055e-07	3.71872e-07	APP/CTNNA2/CTNND2/EFNB2/ERBB4/ERC2/FGF13/FYN/GABRB3/GPC6/GPHN/IGF1R/IL1RAPL1/MAPT/MEF2C/NFIA/NLGN1/NRG1/NRXN1/PAK3/PDZRN3/PTPRD/PTPRS/ROBO2/SDK1/ZNF804A	26
BP	GO:0034329	cell junction assembly	24/278	430/18903	2.53944e-08	8.10312e-06	6.41057e-06	ANK2/APP/CLASP1/CLASP2/CTNND2/EFNB2/EPHA3/ERBB4/FER/FGF13/GABRB3/GPC6/IL1RAPL1/MEF2C/NLGN1/NRG1/NRXN1/PARD3/PRKCA/PTK2/PTPRD/ROBO2/SDK1/WDPCP	24
BP	GO:0050804	modulation of chemical synaptic transmission	24/278	448/18903	5.50964e-08	1.5511e-05	1.22711e-05	APP/BRAF/BTBD9/CASK/CNIH2/CNTN4/DCC/DLGAP1/ERC2/FYN/GSK3B/MAPT/MEF2C/NF1/NLGN1/NRG3/NRXN1/PLCB1/PLK2/PTN/PTPRD/RIMS2/SYT1/YWHAG	24
BP	GO:0099177	regulation of trans-synaptic signaling	24/278	449/18903	5.74482e-08	1.5511e-05	1.22711e-05	APP/BRAF/BTBD9/CASK/CNIH2/CNTN4/DCC/DLGAP1/ERC2/FYN/GSK3B/MAPT/MEF2C/NF1/NLGN1/NRG3/NRXN1/PLCB1/PLK2/PTN/PTPRD/RIMS2/SYT1/YWHAG	24
BP	GO:0031346	positive regulation of cell projection organization	21/278	352/18903	6.38315e-08	1.60035e-05	1.26607e-05	AUTS2/BMPR2/BRAF/CAMK1D/CBFA2T2/EPHA3/FUT9/FYN/GRIP1/GSK3B/IGF1R/IL1RAPL1/MAPT/NLGN1/PAK3/PRKD1/PTN/PTPRD/ROBO1/ROBO2/ZNF804A	21
BP	GO:0060560	developmental growth involved in morphogenesis	17/278	233/18903	6.84393e-08	1.60148e-05	1.26697e-05	APP/AUTS2/BMPR2/DCC/DCLK1/DDR1/EXT1/FGF13/GSK3B/KDM5B/MAP2/MAPT/NDN/PTPRS/RAPH1/RIMS2/SYT1	17
BP	GO:0048813	dendrite morphogenesis	13/278	140/18903	1.54707e-07	3.39388e-05	2.68498e-05	CTNNA2/CTNND2/DCLK1/FYN/GSK3B/IL1RAPL1/MAP2/NLGN1/PAK3/PHACTR1/PTN/PTPRD/RERE	13
BP	GO:0048588	developmental cell growth	16/278	229/18903	3.0218e-07	6.04409e-05	4.78162e-05	APP/AUTS2/BMPR2/DCC/DCLK1/DDR1/EXT1/FGF13/GSK3B/MAP2/MAPT/NDN/PTPRS/RAPH1/RIMS2/SYT1	16
BP	GO:0001667	ameboidal-type cell migration	24/278	492/18903	3.09953e-07	6.04409e-05	4.78162e-05	AKT3/BMPR2/BRAF/CLASP1/CLASP2/EFNB2/ERBB4/FER/HDAC9/HSPB1/ISL1/MEF2C/NF1/NR2F2/PAK3/PLK2/PRKCA/PRKD1/PTK2/PTN/PTPRG/ROBO1/SLC8A1/WDPCP	24
BP	GO:0008038	neuron recognition	8/278	48/18903	4.48546e-07	8.2863e-05	6.55548e-05	APP/CNTN4/EPHA3/EXT1/NDN/NTM/ROBO1/ROBO2	8
BP	GO:0007416	synapse assembly	14/278	184/18903	6.04523e-07	0.000106094	8.39332e-05	APP/EFNB2/ERBB4/FGF13/GABRB3/GPC6/IL1RAPL1/MEF2C/NLGN1/NRG1/NRXN1/PTPRD/ROBO2/SDK1	14
BP	GO:0016049	cell growth	23/278	493/18903	1.1884e-06	0.000198633	0.000157143	APP/AUTS2/BMPR2/CCDC85B/DCC/DCLK1/DDR1/ESR2/EXT1/FGF13/GSK3B/HSPA1A/IGFBP5/IGFBPL1/MAP2/MAPT/NDN/NRG3/PTPRS/RAPH1/RIMS2/SYT1/TEAD1	23
BP	GO:0097120	receptor localization to synapse	8/278	56/18903	1.5252e-06	0.000243338	0.000192511	ANKS1B/CNIH2/DLG2/GPC6/GPHN/GRIP1/KIF5C/NLGN1	8
BP	GO:0021543	pallium development	13/278	174/18903	1.87987e-06	0.00027843	0.000220272	BTG2/FGF13/FOXP2/GLI3/GSK3B/ID4/IGF1R/NF1/PAX6/PHACTR1/PLCB1/ROBO1/ZIC1	13
BP	GO:0008088	axo-dendritic transport	9/278	77/18903	1.90379e-06	0.00027843	0.000220272	APP/CNIH2/DLG2/HSPB1/KIF1B/KIF5C/MAP2/MAPT/UCHL1	9
BP	GO:0007269	neurotransmitter secretion	12/278	151/18903	2.46548e-06	0.00033284	0.000263317	BRAF/CADPS/CASK/ERC2/GSK3B/MEF2C/NF1/NLGN1/NRXN1/PTPRN2/RIMS2/SYT1	12
BP	GO:0099643	signal release from synapse	12/278	151/18903	2.46548e-06	0.00033284	0.000263317	BRAF/CADPS/CASK/ERC2/GSK3B/MEF2C/NF1/NLGN1/NRXN1/PTPRN2/RIMS2/SYT1	12
BP	GO:0070507	regulation of microtubule cytoskeleton organization	12/278	155/18903	3.2413e-06	0.000421369	0.000333355	BICD1/CLASP1/CLASP2/DYRK1A/EPHA3/FGF13/GSK3B/HSPA1A/MAP2/MAPT/NAV3/STMN4	12
BP	GO:0010976	positive regulation of neuron projection development	12/278	157/18903	3.70439e-06	0.000464372	0.000367375	BRAF/CAMK1D/CBFA2T2/EPHA3/FUT9/FYN/IGF1R/NLGN1/PAK3/PRKD1/PTN/ZNF804A	12
BP	GO:0060485	mesenchyme development	17/278	313/18903	4.22282e-06	0.000475987	0.000376564	BMPR2/CLASP1/CLASP2/EPHA3/ERBB4/EXOC4/EXT1/GSK3B/HMGA2/ISL1/MEF2C/NRG1/PKD2/PTK2/ROBO1/ROBO2/ZFPM2	17
BP	GO:0098930	axonal transport	8/278	64/18903	4.29323e-06	0.000475987	0.000376564	CNIH2/DLG2/HSPB1/KIF1B/KIF5C/MAP2/MAPT/UCHL1	8
BP	GO:0051960	regulation of nervous system development	21/278	456/18903	4.29436e-06	0.000475987	0.000376564	BMPR2/BRAF/DCC/FGF13/GLI3/ID4/IL1RAPL1/MAP2/MAPT/NF1/NLGN1/NRXN1/PAK3/PARD3/PAX6/PTN/PTPRD/PTPRS/ROBO1/ROBO2/TENM4	21
BP	GO:0051258	protein polymerization	16/278	281/18903	4.46406e-06	0.000475987	0.000376564	CLASP1/CLASP2/COTL1/DIAPH3/DYRK1A/FCHSD2/FER/FGF13/FHOD3/HSPA1A/MAP2/MAPT/NAV3/PAK3/SSH2/SVIL	16
BP	GO:1902903	regulation of supramolecular fiber organization	19/278	384/18903	4.47509e-06	0.000475987	0.000376564	APP/BRAF/CLASP1/CLASP2/COTL1/CTNNA2/DYRK1A/FCHSD2/FER/FGF13/FHOD3/HSPA1A/MAP2/MAPT/NAV3/PAK3/PPM1E/SSH2/SVIL	19
BP	GO:0003128	heart field specification	5/278	18/18903	4.86094e-06	0.000501821	0.000397002	EXT1/ISL1/MEF2C/ROBO1/ROBO2	5
BP	GO:0031110	regulation of microtubule polymerization or depolymerization	9/278	87/18903	5.32533e-06	0.000534055	0.000422503	CLASP1/CLASP2/DYRK1A/FGF13/HSPA1A/MAP2/MAPT/NAV3/STMN4	9
BP	GO:0045664	regulation of neuron differentiation	13/278	196/18903	6.99154e-06	0.000681675	0.000539289	APP/CNTN4/GLI3/GSK3B/ID4/ISL1/MEF2C/NCOA1/NLGN1/PAX6/TCF12/YWHAG/ZEB1	13
BP	GO:0035418	protein localization to synapse	8/278	69/18903	7.61169e-06	0.000722082	0.000571256	DLG2/GPC6/GRIP1/HSPB1/KIF5C/MAPT/NLGN1/NRXN1	8
BP	GO:0010631	epithelial cell migration	18/278	366/18903	8.70605e-06	0.000804164	0.000636193	AKT3/BMPR2/CLASP1/CLASP2/EFNB2/HDAC9/HSPB1/MEF2C/NF1/NR2F2/PLK2/PRKCA/PRKD1/PTK2/PTN/PTPRG/ROBO1/WDPCP	18
BP	GO:0032271	regulation of protein polymerization	13/278	201/18903	9.18273e-06	0.000813013	0.000643193	CLASP1/COTL1/DYRK1A/FCHSD2/FER/FHOD3/HSPA1A/MAP2/MAPT/NAV3/PAK3/SSH2/SVIL	13
BP	GO:1990138	neuron projection extension	12/278	172/18903	9.46851e-06	0.000813013	0.000643193	AUTS2/BMPR2/DCLK1/DDR1/GSK3B/MAP2/MAPT/NDN/PTPRS/RAPH1/RIMS2/SYT1	12
BP	GO:0050673	epithelial cell proliferation	21/278	481/18903	9.71663e-06	0.000813013	0.000643193	AKT3/BMPR2/CASK/CCND1/CDKN1C/DACH1/EFNB2/FABP7/IGFBP5/ISL1/KDM5B/MEF2C/NF1/NME2/NR2F2/PAX6/PRKCA/PRKD1/PTN/ROBO1/ZEB1	21
BP	GO:0090132	epithelium migration	18/278	369/18903	9.72836e-06	0.000813013	0.000643193	AKT3/BMPR2/CLASP1/CLASP2/EFNB2/HDAC9/HSPB1/MEF2C/NF1/NR2F2/PLK2/PRKCA/PRKD1/PTK2/PTN/PTPRG/ROBO1/WDPCP	18
BP	GO:0048013	ephrin receptor signaling pathway	7/278	52/18903	1.04835e-05	0.000855748	0.000677002	ANKS1B/EFNB2/EPHA3/FYN/KALRN/PAK3/PTK2	7
BP	GO:1901888	regulation of cell junction assembly	13/278	204/18903	1.07701e-05	0.000859156	0.000679698	APP/CLASP1/CLASP2/EPHA3/GPC6/IL1RAPL1/MEF2C/NLGN1/NRXN1/PTK2/PTPRD/ROBO2/WDPCP	13
BP	GO:0048511	rhythmic process	16/278	302/18903	1.10739e-05	0.000860215	0.000680536	BTBD9/DYRK1A/ENOX1/GSK3B/ID4/IGF1R/KCNH7/KDM5B/MAPK10/MAPK8/NCOA2/NLGN1/PHLPP1/PTN/ROBO2/RORA	16
BP	GO:0018210	peptidyl-threonine modification	10/278	120/18903	1.12735e-05	0.000860215	0.000680536	APP/DYRK1A/GALNT13/GSK3B/MAPK8/PARD3/PRKCA/PRKD1/STK39/TNKS	10
BP	GO:0090130	tissue migration	18/278	374/18903	1.16736e-05	0.000871795	0.000689698	AKT3/BMPR2/CLASP1/CLASP2/EFNB2/HDAC9/HSPB1/MEF2C/NF1/NR2F2/PLK2/PRKCA/PRKD1/PTK2/PTN/PTPRG/ROBO1/WDPCP	18
BP	GO:0050767	regulation of neurogenesis	18/278	377/18903	1.30017e-05	0.000939625	0.000743359	BMPR2/BRAF/DCC/FGF13/GLI3/ID4/IL1RAPL1/MAP2/MAPT/NF1/PAK3/PAX6/PTN/PTPRD/PTPRS/ROBO1/ROBO2/TENM4	18
BP	GO:0061351	neural precursor cell proliferation	11/278	149/18903	1.31173e-05	0.000939625	0.000743359	BTG2/FGF13/GLI3/ID4/NF1/PAX6/PTBP2/PTN/RERE/RORA/SOX5	11
BP	GO:0021510	spinal cord development	9/278	98/18903	1.41937e-05	0.000996394	0.000788271	DCC/GLI3/ISL1/NF1/PAX6/PBX3/PKD2/PTBP2/ZIC1	9
BP	GO:0010092	specification of animal organ identity	6/278	37/18903	1.5193e-05	0.00104564	0.000827226	EXT1/GLI3/ISL1/MEF2C/ROBO1/ROBO2	6
BP	GO:0051962	positive regulation of nervous system development	15/278	279/18903	1.75743e-05	0.00118627	0.000938484	BMPR2/BRAF/GLI3/ID4/IL1RAPL1/MAPT/NLGN1/NRXN1/PAK3/PAX6/PTN/PTPRD/ROBO1/ROBO2/TENM4	15
BP	GO:0098742	cell-cell adhesion via plasma-membrane adhesion molecules	15/278	282/18903	1.99206e-05	0.0013131	0.00103882	CADM1/CADM2/CNTN4/CRB1/GPC6/IL1RAPL1/NLGN1/PCDH11X/PCDH9/PTPRD/PTPRS/ROBO1/ROBO2/SDK1/TENM4	15
BP	GO:0050770	regulation of axonogenesis	11/278	156/18903	2.02015e-05	0.0013131	0.00103882	BMPR2/BRAF/DCC/FGF13/GSK3B/MAP2/MAPT/PAK3/PTPRS/ROBO1/ROBO2	11
BP	GO:0032886	regulation of microtubule-based process	14/278	252/18903	2.33346e-05	0.00148862	0.00117768	BICD1/CLASP1/CLASP2/CNIH2/DYRK1A/EPHA3/FGF13/GSK3B/HSPA1A/MAP2/MAPT/NAV3/PLK2/STMN4	14
BP	GO:0010762	regulation of fibroblast migration	6/278	40/18903	2.41742e-05	0.00148862	0.00117768	BRAF/FER/PAK3/PTK2/SLC8A1/WDPCP	6
BP	GO:0031111	negative regulation of microtubule polymerization or depolymerization	6/278	40/18903	2.41742e-05	0.00148862	0.00117768	CLASP1/CLASP2/DYRK1A/FGF13/MAP2/NAV3	6
BP	GO:0003148	outflow tract septum morphogenesis	5/278	25/18903	2.77042e-05	0.00167658	0.00132638	BMPR2/ISL1/ROBO1/ROBO2/ZFPM2	5
BP	GO:0010632	regulation of epithelial cell migration	15/278	292/18903	2.98686e-05	0.00177693	0.00140577	AKT3/BMPR2/CLASP1/CLASP2/HDAC9/HSPB1/MEF2C/NF1/NR2F2/PLK2/PRKCA/PRKD1/PTK2/PTN/PTPRG	15
BP	GO:0018209	peptidyl-serine modification	16/278	332/18903	3.52974e-05	0.00202502	0.00160204	AKT3/APP/BRAF/CAMK1D/DCLK1/DYRK1A/GALNT13/GSK3B/MAPK8/PDE4D/PLK2/PRKCA/PRKD1/SMYD3/STK39/TNKS	16
BP	GO:0048638	regulation of developmental growth	16/278	332/18903	3.52974e-05	0.00202502	0.00160204	APP/BMPR2/DCC/DUSP6/ERBB4/FGF13/GSK3B/MAP2/MAPT/MBD5/MEF2C/PLCB1/PTPRS/RIMS2/SYT1/ZFPM2	16
BP	GO:0046785	microtubule polymerization	8/278	85/18903	3.57695e-05	0.00202502	0.00160204	CLASP1/CLASP2/DYRK1A/FGF13/HSPA1A/MAP2/MAPT/NAV3	8
BP	GO:0018107	peptidyl-threonine phosphorylation	9/278	111/18903	3.86013e-05	0.00215064	0.00170142	APP/DYRK1A/GSK3B/MAPK8/PARD3/PRKCA/PRKD1/STK39/TNKS	9
BP	GO:0050769	positive regulation of neurogenesis	13/278	231/18903	3.99425e-05	0.00216712	0.00171446	BMPR2/BRAF/GLI3/ID4/IL1RAPL1/MAPT/PAK3/PAX6/PTN/PTPRD/ROBO1/ROBO2/TENM4	13
BP	GO:0010970	transport along microtubule	11/278	168/18903	4.01318e-05	0.00216712	0.00171446	APP/BICD1/CNIH2/DLG2/HSPB1/KIF1B/KIF5C/MAP2/MAPT/UCHL1/WDPCP	11
BP	GO:0050678	regulation of epithelial cell proliferation	18/278	414/18903	4.47723e-05	0.00238107	0.00188372	AKT3/BMPR2/CASK/CCND1/CDKN1C/EFNB2/ISL1/KDM5B/MEF2C/NF1/NME2/NR2F2/PAX6/PRKCA/PRKD1/PTN/ROBO1/ZEB1	18
BP	GO:0040013	negative regulation of locomotion	18/278	419/18903	5.22769e-05	0.00273868	0.00216664	ARRDC3/BRAF/CD200/CLASP1/CLASP2/DACH1/FRMD5/IGFBP5/MEF2C/NAV3/NF1/NR2F2/NRG1/NRG3/PLCB1/PTPRG/ROBO1/ROBO2	18
BP	GO:0021953	central nervous system neuron differentiation	11/278	174/18903	5.5282e-05	0.00283211	0.00224055	BTG2/DCC/DCLK1/GLI3/ID4/ISL1/MAP2/MAPT/PAX6/RORA/ZSWIM6	11
BP	GO:0007611	learning or memory	14/278	273/18903	5.59918e-05	0.00283211	0.00224055	APP/BRAF/BTBD9/BTG2/FGF13/FYN/MAPT/MEF2C/NF1/NRXN1/NRXN3/PLCB1/PLK2/PTN	14
BP	GO:0007405	neuroblast proliferation	7/278	67/18903	5.64808e-05	0.00283211	0.00224055	FGF13/GLI3/ID4/NF1/PAX6/PTN/SOX5	7
BP	GO:0021987	cerebral cortex development	9/278	117/18903	5.84408e-05	0.00285434	0.00225814	FGF13/FOXP2/GLI3/GSK3B/NF1/PAX6/PHACTR1/PLCB1/ROBO1	9
BP	GO:0106027	neuron projection organization	8/278	91/18903	5.85507e-05	0.00285434	0.00225814	APP/CTNND2/FYN/GSK3B/IGF1R/NLGN1/PAK3/ZNF804A	8
BP	GO:0048167	regulation of synaptic plasticity	12/278	207/18903	5.93819e-05	0.00285521	0.00225883	APP/BRAF/CNTN4/ERC2/GSK3B/MAPT/MEF2C/NF1/PLK2/PTN/RIMS2/YWHAG	12
BP	GO:0050807	regulation of synapse organization	12/278	209/18903	6.51448e-05	0.00304569	0.00240951	APP/CTNNA2/FYN/GPC6/IL1RAPL1/MEF2C/NLGN1/NRXN1/PAK3/PTPRD/ROBO2/ZNF804A	12
BP	GO:0099111	microtubule-based transport	12/278	209/18903	6.51448e-05	0.00304569	0.00240951	APP/BICD1/CNIH2/DLG2/HSPB1/KIF1B/KIF5C/MAP2/MAPT/RFX3/UCHL1/WDPCP	12
BP	GO:0018105	peptidyl-serine phosphorylation	15/278	313/18903	6.59465e-05	0.00304569	0.00240951	AKT3/APP/BRAF/CAMK1D/DCLK1/DYRK1A/GSK3B/MAPK8/PDE4D/PLK2/PRKCA/PRKD1/SMYD3/STK39/TNKS	15
BP	GO:0050890	cognition	15/278	314/18903	6.83554e-05	0.00311594	0.00246509	APP/BRAF/BTBD9/BTG2/CHL1/FGF13/FYN/MAPT/MEF2C/NF1/NRXN1/NRXN3/PLCB1/PLK2/PTN	15
BP	GO:0007158	neuron cell-cell adhesion	4/278	16/18903	7.24777e-05	0.00321762	0.00254554	CNTN4/NLGN1/NRXN1/NRXN3	4
BP	GO:0006836	neurotransmitter transport	12/278	212/18903	7.46928e-05	0.00321762	0.00254554	BRAF/CADPS/CASK/ERC2/GSK3B/MEF2C/NF1/NLGN1/NRXN1/PTPRN2/RIMS2/SYT1	12
BP	GO:0043542	endothelial cell migration	14/278	281/18903	7.63266e-05	0.00321762	0.00254554	AKT3/BMPR2/EFNB2/HDAC9/HSPB1/MEF2C/NF1/NR2F2/PLK2/PRKCA/PRKD1/PTK2/PTN/ROBO1	14
BP	GO:0007612	learning	10/278	150/18903	7.72432e-05	0.00321762	0.00254554	APP/BRAF/BTG2/FGF13/FYN/NF1/NRXN1/NRXN3/PLCB1/PTN	10
BP	GO:0030010	establishment of cell polarity	10/278	150/18903	7.72432e-05	0.00321762	0.00254554	CLASP1/CRB1/FGF13/FRMD4A/GSK3B/IGF1R/PARD3/PAX6/PTK2/WDPCP	10
BP	GO:0007389	pattern specification process	19/278	472/18903	7.72863e-05	0.00321762	0.00254554	BMPR2/BTG2/ERBB4/EXT1/GLI3/ISL1/MEF2C/MEIS3/NR2F2/NRG3/PAX6/PBX3/PKD2/RFX3/ROBO1/ROBO2/SP8/ZEB1/ZIC1	19
BP	GO:0017157	regulation of exocytosis	12/278	213/18903	7.81328e-05	0.00321762	0.00254554	ATP9A/BRAF/CADPS/CASK/CLASP1/CLASP2/FER/GSK3B/IL1RAPL1/NLGN1/RIMS2/SYT1	12
BP	GO:0008089	anterograde axonal transport	6/278	49/18903	7.88363e-05	0.00321762	0.00254554	CNIH2/DLG2/HSPB1/KIF1B/KIF5C/MAP2	6
BP	GO:0099054	presynapse assembly	6/278	49/18903	7.88363e-05	0.00321762	0.00254554	APP/EFNB2/GPC6/IL1RAPL1/NLGN1/PTPRD	6
BP	GO:0048675	axon extension	9/278	122/18903	8.09727e-05	0.00326683	0.00258446	AUTS2/BMPR2/DCLK1/GSK3B/MAP2/MAPT/NDN/PTPRS/RAPH1	9
BP	GO:0050803	regulation of synapse structure or activity	12/278	215/18903	8.54241e-05	0.00340726	0.00269556	APP/CTNNA2/FYN/GPC6/IL1RAPL1/MEF2C/NLGN1/NRXN1/PAK3/PTPRD/ROBO2/ZNF804A	12
BP	GO:0031109	microtubule polymerization or depolymerization	9/278	124/18903	9.1831e-05	0.00362165	0.00286517	CLASP1/CLASP2/DYRK1A/FGF13/HSPA1A/MAP2/MAPT/NAV3/STMN4	9
BP	GO:0001952	regulation of cell-matrix adhesion	9/278	125/18903	9.77026e-05	0.00370931	0.00293452	CASK/CLASP1/CLASP2/DDR1/EPHA3/GSK3B/NF1/PTK2/WDPCP	9
BP	GO:0045665	negative regulation of neuron differentiation	7/278	73/18903	9.81788e-05	0.00370931	0.00293452	APP/CNTN4/GLI3/GSK3B/ID4/ISL1/PAX6	7
BP	GO:0007157	heterophilic cell-cell adhesion via plasma membrane cell adhesion molecules	6/278	51/18903	9.90664e-05	0.00370931	0.00293452	CADM1/CRB1/IL1RAPL1/NLGN1/PTPRD/TENM4	6
BP	GO:1902414	protein localization to cell junction	8/278	98/18903	9.92356e-05	0.00370931	0.00293452	DLG2/GPC6/GRIP1/HSPB1/KIF5C/MAPT/NLGN1/NRXN1	8
BP	GO:0048732	gland development	18/278	441/18903	0.00010024	0.00370931	0.00293452	BRAF/CADM1/CCND1/DDR1/ERBB4/EXT1/GLI3/ID4/IGFBP5/ISL1/KDM5B/NF1/NRG1/NRG3/PAX6/PKD2/PTN/ROBO1	18
BP	GO:1901214	regulation of neuron death	15/278	325/18903	0.000100394	0.00370931	0.00293452	BRAF/BTG2/CCND1/CD200/CHL1/DCC/EFNB2/FYN/GSK3B/ISL1/MAPT/MEF2C/NF1/PAK3/TRIM2	15
BP	GO:0001505	regulation of neurotransmitter levels	12/278	219/18903	0.00010178	0.00372133	0.00294403	BRAF/CADPS/CASK/ERC2/GSK3B/MEF2C/NF1/NLGN1/NRXN1/PTPRN2/RIMS2/SYT1	12
BP	GO:0099172	presynapse organization	6/278	52/18903	0.000110621	0.00400287	0.00316676	APP/EFNB2/GPC6/IL1RAPL1/NLGN1/PTPRD	6
BP	GO:0021772	olfactory bulb development	5/278	33/18903	0.000112409	0.00402608	0.00318513	ERBB4/EXT1/ROBO1/ROBO2/ZIC1	5
BP	GO:0032970	regulation of actin filament-based process	17/278	406/18903	0.000115056	0.00407926	0.0032272	ANK2/BRAF/CLASP1/CLASP2/COTL1/CTNNA2/EPHA3/FCHSD2/FER/FGF13/FHOD3/PAK3/PDE4B/PDE4D/PPM1E/SSH2/SVIL	17
BP	GO:0070997	neuron death	16/278	368/18903	0.000118624	0.00413776	0.00327347	APP/BRAF/BTG2/CCND1/CD200/CHL1/DCC/EFNB2/FYN/GSK3B/ISL1/MAPT/MEF2C/NF1/PAK3/TRIM2	16
BP	GO:0008356	asymmetric cell division	4/278	18/18903	0.000119064	0.00413776	0.00327347	FGF13/PARD3/PAX6/SOX5	4
BP	GO:0043254	regulation of protein-containing complex assembly	17/278	410/18903	0.000129413	0.00445334	0.00352314	CLASP1/COTL1/DYRK1A/FAF1/FCHSD2/FER/FHOD3/GSK3B/HSPA1A/ISL1/MAP2/MAPT/NAV3/NRG1/PAK3/SSH2/SVIL	17
BP	GO:0031113	regulation of microtubule polymerization	6/278	54/18903	0.00013693	0.00466627	0.00369159	CLASP1/DYRK1A/HSPA1A/MAP2/MAPT/NAV3	6
BP	GO:0010001	glial cell differentiation	12/278	227/18903	0.000142698	0.00481607	0.0038101	APP/CRB1/GLI3/ID4/MAPT/NF1/NRG1/PARD3/PAX6/PTN/TENM4/VIM	12
BP	GO:0071625	vocalization behavior	4/278	19/18903	0.000149076	0.00488895	0.00386776	EXT1/GLI3/NRXN1/NRXN3	4
BP	GO:0021988	olfactory lobe development	5/278	35/18903	0.000150108	0.00488895	0.00386776	ERBB4/EXT1/ROBO1/ROBO2/ZIC1	5
BP	GO:0060914	heart formation	5/278	35/18903	0.000150108	0.00488895	0.00386776	EXT1/ISL1/MEF2C/ROBO1/ROBO2	5
BP	GO:0051963	regulation of synapse assembly	8/278	104/18903	0.000150577	0.00488895	0.00386776	APP/GPC6/IL1RAPL1/MEF2C/NLGN1/NRXN1/PTPRD/ROBO2	8
BP	GO:0010761	fibroblast migration	6/278	55/18903	0.000151822	0.00488895	0.00386776	BRAF/FER/PAK3/PTK2/SLC8A1/WDPCP	6
BP	GO:0010594	regulation of endothelial cell migration	12/278	230/18903	0.000161316	0.00514745	0.00407226	AKT3/BMPR2/HDAC9/HSPB1/MEF2C/NF1/NR2F2/PLK2/PRKCA/PRKD1/PTK2/PTN	12
BP	GO:0051494	negative regulation of cytoskeleton organization	10/278	165/18903	0.000170044	0.00537707	0.00425392	CLASP1/CLASP2/CTNNA2/DYRK1A/FGF13/FHOD3/MAP2/NAV3/SSH2/SVIL	10
BP	GO:0099173	postsynapse organization	10/278	166/18903	0.00017864	0.00559844	0.00442906	CTNND2/FYN/GPHN/IGF1R/IL1RAPL1/NLGN1/NRXN1/PAK3/PTPRD/ZNF804A	10
BP	GO:0001558	regulation of cell growth	17/278	422/18903	0.000182335	0.0055998	0.00443013	BMPR2/CCDC85B/DCC/DDR1/ESR2/FGF13/GSK3B/HSPA1A/IGFBP5/IGFBPL1/MAP2/MAPT/NRG3/PTPRS/RIMS2/SYT1/TEAD1	17
BP	GO:0060537	muscle tissue development	17/278	422/18903	0.000182335	0.0055998	0.00443013	BTG2/EFNB2/ERBB4/FHOD3/HDAC9/IGFBP5/ISL1/MEF2C/NF1/NR2F2/NRG1/PKD2/RBFOX1/SLC8A1/SVIL/TENM4/ZFPM2	17
BP	GO:0060840	artery development	8/278	107/18903	0.000183469	0.0055998	0.00443013	AKT3/BMPR2/EFNB2/GLI3/NF1/PKD2/ROBO1/ROBO2	8
BP	GO:2000146	negative regulation of cell motility	16/278	383/18903	0.000187173	0.00562795	0.0044524	BRAF/CD200/CLASP1/CLASP2/DACH1/FRMD5/IGFBP5/MEF2C/NAV3/NF1/NR2F2/NRG1/NRG3/PLCB1/PTPRG/ROBO1	16
BP	GO:0003205	cardiac chamber development	10/278	167/18903	0.000187598	0.00562795	0.0044524	ANK2/BMPR2/CPE/IGF1R/ISL1/MEF2C/NRG1/ROBO1/ROBO2/ZFPM2	10
BP	GO:0007163	establishment or maintenance of cell polarity	12/278	234/18903	0.000189343	0.00563216	0.00445573	CLASP1/CLASP2/CRB1/DLG2/FGF13/FRMD4A/GSK3B/IGF1R/PARD3/PAX6/PTK2/WDPCP	12
BP	GO:0010720	positive regulation of cell development	14/278	307/18903	0.000193124	0.00569636	0.00450652	BMPR2/BRAF/GLI3/ID4/IL1RAPL1/MAPT/PAK3/PAX6/PTN/PTPRD/RFX3/ROBO1/ROBO2/TENM4	14
BP	GO:0021766	hippocampus development	7/278	82/18903	0.000204752	0.00597026	0.00472321	BTG2/FGF13/GLI3/GSK3B/ID4/IGF1R/ZIC1	7
BP	GO:1902904	negative regulation of supramolecular fiber organization	10/278	169/18903	0.000206652	0.00597026	0.00472321	CLASP1/CLASP2/CTNNA2/DYRK1A/FGF13/FHOD3/MAP2/NAV3/SSH2/SVIL	10
BP	GO:0030879	mammary gland development	9/278	138/18903	0.000207513	0.00597026	0.00472321	CCND1/DDR1/ERBB4/GLI3/IGFBP5/KDM5B/NRG1/NRG3/ROBO1	9
BP	GO:0050806	positive regulation of synaptic transmission	10/278	170/18903	0.000216773	0.00618595	0.00489385	APP/BRAF/GSK3B/NF1/NLGN1/NRXN1/PLK2/PTN/RIMS2/SYT1	10
BP	GO:0061448	connective tissue development	13/278	274/18903	0.000221947	0.00628253	0.00497025	ARRDC3/BMPR2/EXT1/GLI3/HMGA2/ID4/MEF2C/NCOA1/NCOA2/PUM2/SOX5/VPS13B/ZEB1	13
BP	GO:0016079	synaptic vesicle exocytosis	8/278	111/18903	0.0002363	0.00658263	0.00520767	BRAF/CADPS/CASK/ERC2/GSK3B/NLGN1/RIMS2/SYT1	8
BP	GO:0021761	limbic system development	8/278	111/18903	0.0002363	0.00658263	0.00520767	BTG2/FGF13/GLI3/GSK3B/ID4/IGF1R/NF1/ZIC1	8
BP	GO:0010977	negative regulation of neuron projection development	9/278	142/18903	0.000257014	0.00700059	0.00553833	CBFA2T2/DCC/EFNB2/FGF13/MAP2/NLGN1/PTPRG/PTPRS/VIM	9
BP	GO:0042552	myelination	9/278	142/18903	0.000257014	0.00700059	0.00553833	ANK2/ID4/NF1/NRG1/PARD3/PTN/QKI/SBF2/TENM4	9
BP	GO:1904062	regulation of cation transmembrane transport	16/278	394/18903	0.000257287	0.00700059	0.00553833	ANK2/APP/CACNA2D1/CNIH2/DPP10/FGF13/FYN/MEF2C/NLGN1/PDE4B/PDE4D/PKD2/PRKD1/SLC8A1/STK39/TSPAN13	16
BP	GO:0030705	cytoskeleton-dependent intracellular transport	11/278	208/18903	0.000267995	0.00722574	0.00571645	APP/BICD1/CNIH2/DLG2/HSPB1/KIF1B/KIF5C/MAP2/MAPT/UCHL1/WDPCP	11
BP	GO:0030534	adult behavior	9/278	143/18903	0.00027081	0.00722574	0.00571645	APP/BTBD9/CHL1/NRXN1/NRXN3/PBX3/SDK1/UCHL1/ZIC1	9
BP	GO:2000310	regulation of NMDA receptor activity	4/278	22/18903	0.000271737	0.00722574	0.00571645	APP/CNIH2/MEF2C/NLGN1	4
BP	GO:0010469	regulation of signaling receptor activity	10/278	175/18903	0.000273837	0.00722683	0.00571731	APP/BICD1/CNIH2/DLGAP1/ESR2/LDOC1/LY6H/MEF2C/NLGN1/PDE4D	10
BP	GO:0007272	ensheathment of neurons	9/278	144/18903	0.000285214	0.00729061	0.00576777	ANK2/ID4/NF1/NRG1/PARD3/PTN/QKI/SBF2/TENM4	9
BP	GO:0008366	axon ensheathment	9/278	144/18903	0.000285214	0.00729061	0.00576777	ANK2/ID4/NF1/NRG1/PARD3/PTN/QKI/SBF2/TENM4	9
BP	GO:1902692	regulation of neuroblast proliferation	5/278	40/18903	0.000286559	0.00729061	0.00576777	GLI3/ID4/NF1/PAX6/PTN	5
BP	GO:0010634	positive regulation of epithelial cell migration	10/278	176/18903	0.00028664	0.00729061	0.00576777	AKT3/BMPR2/CLASP1/CLASP2/HDAC9/HSPB1/PLK2/PRKCA/PRKD1/PTK2	10
BP	GO:0050680	negative regulation of epithelial cell proliferation	10/278	176/18903	0.00028664	0.00729061	0.00576777	CASK/CDKN1C/EFNB2/ISL1/MEF2C/NF1/NR2F2/PAX6/ROBO1/ZEB1	10
BP	GO:0007623	circadian rhythm	11/278	210/18903	0.000290931	0.00734653	0.00581201	BTBD9/DYRK1A/GSK3B/ID4/KCNH7/MAPK10/MAPK8/NCOA2/NLGN1/PHLPP1/RORA	11
BP	GO:0045165	cell fate commitment	13/278	282/18903	0.000293252	0.00735225	0.00581654	BRAF/ERBB4/EXT1/FGF13/GLI3/ISL1/MEF2C/MYT1L/NR2F2/NRG1/PAX6/SOX5/TENM4	13
BP	GO:0043534	blood vessel endothelial cell migration	10/278	177/18903	0.000299939	0.00746656	0.00590697	AKT3/EFNB2/HDAC9/HSPB1/MEF2C/NF1/PLK2/PRKCA/PRKD1/ROBO1	10
BP	GO:0031503	protein-containing complex localization	10/278	178/18903	0.00031375	0.00775537	0.00613545	ANKS1B/CNIH2/DLG2/EFNB2/GPC6/GPHN/GRIP1/KIF5C/NLGN1/WDPCP	10
BP	GO:2000178	negative regulation of neural precursor cell proliferation	4/278	23/18903	0.000325161	0.00798123	0.00631414	BTG2/NF1/PAX6/PTN	4
BP	GO:0021782	glial cell development	8/278	117/18903	0.000338382	0.00824807	0.00652524	APP/ID4/MAPT/NF1/NRG1/PARD3/TENM4/VIM	8
BP	GO:0048671	negative regulation of collateral sprouting	3/278	10/18903	0.000349787	0.00835207	0.00660751	DCC/FGF13/PTPRS	3
BP	GO:0097090	presynaptic membrane organization	3/278	10/18903	0.000349787	0.00835207	0.00660751	IL1RAPL1/NLGN1/PTPRD	3
BP	GO:1905383	protein localization to presynapse	3/278	10/18903	0.000349787	0.00835207	0.00660751	DLG2/HSPB1/KIF5C	3
BP	GO:2000177	regulation of neural precursor cell proliferation	7/278	90/18903	0.000364229	0.00863814	0.00683383	BTG2/GLI3/ID4/NF1/PAX6/PTBP2/PTN	7
BP	GO:0032535	regulation of cellular component size	15/278	367/18903	0.000373097	0.00878906	0.00695323	AKT3/BMPR2/COTL1/DCC/FCHSD2/FER/FGF13/FHOD3/GSK3B/MAP2/MAPT/PAK3/PTPRS/SSH2/SVIL	15
BP	GO:0030336	negative regulation of cell migration	15/278	368/18903	0.00038391	0.00896577	0.00709303	BRAF/CD200/CLASP1/CLASP2/DACH1/IGFBP5/MEF2C/NAV3/NF1/NR2F2/NRG1/NRG3/PLCB1/PTPRG/ROBO1	15
BP	GO:0035988	chondrocyte proliferation	4/278	24/18903	0.000385707	0.00896577	0.00709303	BMPR2/EXT1/HMGA2/MMP16	4
BP	GO:0046928	regulation of neurotransmitter secretion	7/278	91/18903	0.000389702	0.00899905	0.00711935	BRAF/CASK/GSK3B/MEF2C/NF1/NLGN1/SYT1	7
BP	GO:0006887	exocytosis	15/278	369/18903	0.000394992	0.00906158	0.00716882	ATP9A/BRAF/CADPS/CASK/CLASP1/CLASP2/ERC2/EXOC4/EXOC6B/FER/GSK3B/IL1RAPL1/NLGN1/RIMS2/SYT1	15
BP	GO:0051961	negative regulation of nervous system development	9/278	151/18903	0.000404857	0.00922757	0.00730015	DCC/FGF13/ID4/MAP2/NF1/PAX6/PTN/PTPRS/ROBO2	9
BP	GO:0044089	positive regulation of cellular component biogenesis	18/278	498/18903	0.000440772	0.00994745	0.00786965	AUTS2/BRAF/CLASP1/CLASP2/FAF1/FCHSD2/FER/GSK3B/HSPA1A/IL1RAPL1/MAPT/NAV3/NLGN1/NRG1/NRXN1/PPM1E/PRKCA/PTPRD	18
BP	GO:1901653	cellular response to peptide	15/278	373/18903	0.000442109	0.00994745	0.00786965	APP/CACNA2D1/FER/FYN/GSK3B/HDAC9/IGF1R/LDOC1/MBD5/NCOA1/NCOA2/PLCB1/PTK2/VIM/YWHAG	15
BP	GO:0007274	neuromuscular synaptic transmission	4/278	25/18903	0.000453898	0.0100834	0.00797724	ERC2/FCHSD2/KIF1B/NLGN1	4
BP	GO:0048668	collateral sprouting	4/278	25/18903	0.000453898	0.0100834	0.00797724	APP/DCC/FGF13/PTPRS	4
BP	GO:0022612	gland morphogenesis	8/278	123/18903	0.00047386	0.0104364	0.0082565	DDR1/GLI3/ID4/IGFBP5/KDM5B/NRG3/PAX6/PTN	8
BP	GO:0021889	olfactory bulb interneuron differentiation	3/278	11/18903	0.000475735	0.0104364	0.0082565	ERBB4/ROBO1/ROBO2	3
BP	GO:1904646	cellular response to amyloid-beta	5/278	45/18903	0.000501167	0.0109261	0.00864386	APP/CACNA2D1/FYN/GSK3B/IGF1R	5
BP	GO:0048645	animal organ formation	6/278	69/18903	0.000528848	0.0114186	0.00903348	EXT1/GLI3/ISL1/MEF2C/ROBO1/ROBO2	6
BP	GO:0034453	microtubule anchoring	4/278	26/18903	0.000530263	0.0114186	0.00903348	BICD1/CLASP1/CLASP2/GSK3B	4
BP	GO:0007019	microtubule depolymerization	5/278	46/18903	0.000555603	0.0116957	0.00925276	CLASP1/CLASP2/FGF13/NAV3/STMN4	5
BP	GO:0060443	mammary gland morphogenesis	5/278	46/18903	0.000555603	0.0116957	0.00925276	DDR1/GLI3/IGFBP5/KDM5B/NRG3	5
BP	GO:0003206	cardiac chamber morphogenesis	8/278	126/18903	0.000556463	0.0116957	0.00925276	BMPR2/CPE/ISL1/MEF2C/NRG1/ROBO1/ROBO2/ZFPM2	8
BP	GO:0003231	cardiac ventricle development	8/278	126/18903	0.000556463	0.0116957	0.00925276	BMPR2/CPE/ISL1/MEF2C/NRG1/ROBO1/ROBO2/ZFPM2	8
BP	GO:2001222	regulation of neuron migration	5/278	47/18903	0.00061436	0.0127574	0.0100927	CTNNA2/NRG1/NRG3/PHACTR1/ZNF609	5
BP	GO:0007026	negative regulation of microtubule depolymerization	4/278	27/18903	0.000615336	0.0127574	0.0100927	CLASP1/CLASP2/FGF13/NAV3	4
BP	GO:0031345	negative regulation of cell projection organization	10/278	194/18903	0.00061788	0.0127574	0.0100927	CBFA2T2/DCC/EFNB2/FGF13/FYN/MAP2/NLGN1/PTPRG/PTPRS/VIM	10
BP	GO:0061795	Golgi lumen acidification	3/278	12/18903	0.00062743	0.012814	0.0101375	ATP6V0B/ATP6V0C/RNASEK	3
BP	GO:0023061	signal release	17/278	470/18903	0.000627923	0.012814	0.0101375	BRAF/CADPS/CASK/CPE/ERC2/GSK3B/ISL1/KDM5B/MEF2C/NF1/NLGN1/NRXN1/PTPRN2/RFX3/RIMS2/SCG5/SYT1	17
BP	GO:0001503	ossification	16/278	429/18903	0.000651938	0.0132272	0.0104643	BMPR2/EXT1/GLI3/GSK3B/ID4/IGFBP5/MEF2C/MMP16/NF1/PRKD1/PTK2/PTN/SLC8A1/SMOC1/WWOX/XYLT1	16
BP	GO:0042391	regulation of membrane potential	16/278	431/18903	0.000685109	0.0138203	0.0109336	ANK2/APP/CACNA2D1/CNIH2/FGF13/GABRB3/GSK3B/KCNH7/KCNH8/KCNQ3/MAPT/MEF2C/NLGN1/NRXN1/RIMS2/SLC8A1	16
BP	GO:0048709	oligodendrocyte differentiation	7/278	100/18903	0.000689146	0.0138223	0.0109351	GLI3/ID4/NF1/NRG1/PAX6/PTN/TENM4	7
BP	GO:2001257	regulation of cation channel activity	10/278	197/18903	0.000695807	0.0138766	0.0109781	ANK2/APP/CACNA2D1/CNIH2/FGF13/MEF2C/NLGN1/PDE4B/PDE4D/PKD2	10
BP	GO:0042063	gliogenesis	13/278	310/18903	0.000716449	0.0142075	0.0112399	APP/CRB1/GLI3/ID4/MAPT/NDN/NF1/NRG1/PARD3/PAX6/PTN/TENM4/VIM	13
BP	GO:0035249	synaptic transmission, glutamatergic	7/278	102/18903	0.000775528	0.0152927	0.0120984	CNIH2/EXT1/MEF2C/NF1/NLGN1/NRXN1/SYT1	7
BP	GO:0051656	establishment of organelle localization	16/278	437/18903	0.000793417	0.015475	0.0122426	ATP9A/BICD1/CLASP1/CLASP2/CNIH2/EXOC4/EXOC6B/FER/FMN2/KIF5C/MAP2/MAPT/NLGN1/PARD3/PAX6/UCHL1	16
BP	GO:0009214	cyclic nucleotide catabolic process	3/278	13/18903	0.000806814	0.015475	0.0122426	PDE10A/PDE4B/PDE4D	3
BP	GO:0048680	positive regulation of axon regeneration	3/278	13/18903	0.000806814	0.015475	0.0122426	BRAF/IGF1R/PTN	3
BP	GO:0098840	protein transport along microtubule	3/278	13/18903	0.000806814	0.015475	0.0122426	DLG2/HSPB1/KIF5C	3
BP	GO:0099118	microtubule-based protein transport	3/278	13/18903	0.000806814	0.015475	0.0122426	DLG2/HSPB1/KIF5C	3
BP	GO:0050773	regulation of dendrite development	7/278	103/18903	0.000821813	0.0156623	0.0123908	CAMK1D/DCC/GSK3B/IL1RAPL1/PAK3/PTN/PTPRD	7
BP	GO:0043536	positive regulation of blood vessel endothelial cell migration	6/278	75/18903	0.000825507	0.0156623	0.0123908	AKT3/HDAC9/HSPB1/PLK2/PRKCA/PRKD1	6
BP	GO:0048880	sensory system development	15/278	398/18903	0.000860027	0.0162295	0.0128396	BMPR2/CRB1/DCX/GLI3/ISL1/KDM5B/MEIS3/NF1/PAX6/PBX3/SDK1/SMOC1/VIM/WDPCP/ZEB1	15
BP	GO:0110053	regulation of actin filament organization	12/278	278/18903	0.000887719	0.0166625	0.0131821	BRAF/CLASP1/CLASP2/COTL1/CTNNA2/FCHSD2/FER/FHOD3/PAK3/PPM1E/SSH2/SVIL	12
BP	GO:0051588	regulation of neurotransmitter transport	7/278	105/18903	0.000920917	0.0171937	0.0136024	BRAF/CASK/GSK3B/MEF2C/NF1/NLGN1/SYT1	7
BP	GO:0060612	adipose tissue development	5/278	52/18903	0.000980599	0.0182111	0.0144072	ARRDC3/NCOA1/NCOA2/PUM2/VPS13B	5
BP	GO:0048388	endosomal lumen acidification	3/278	14/18903	0.00101573	0.0185688	0.0146902	ATP6V0B/ATP6V0C/RNASEK	3
BP	GO:0070572	positive regulation of neuron projection regeneration	3/278	14/18903	0.00101573	0.0185688	0.0146902	BRAF/IGF1R/PTN	3
BP	GO:0098814	spontaneous synaptic transmission	3/278	14/18903	0.00101573	0.0185688	0.0146902	APP/RIMS2/SYT1	3
BP	GO:0031114	regulation of microtubule depolymerization	4/278	31/18903	0.00105348	0.0189627	0.0150018	CLASP1/CLASP2/FGF13/NAV3	4
BP	GO:0048679	regulation of axon regeneration	4/278	31/18903	0.00105348	0.0189627	0.0150018	BRAF/IGF1R/PTN/PTPRS	4
BP	GO:0140058	neuron projection arborization	4/278	31/18903	0.00105348	0.0189627	0.0150018	GRIP1/NLGN1/PHACTR1/PTN	4
BP	GO:0001649	osteoblast differentiation	11/278	246/18903	0.00108614	0.0193669	0.0153216	BMPR2/GLI3/GSK3B/ID4/IGFBP5/MEF2C/NF1/PRKD1/PTK2/SMOC1/WWOX	11
BP	GO:0061387	regulation of extent of cell growth	7/278	108/18903	0.00108698	0.0193669	0.0153216	BMPR2/DCC/FGF13/GSK3B/MAP2/MAPT/PTPRS	7
BP	GO:0042692	muscle cell differentiation	15/278	409/18903	0.00112996	0.0199961	0.0158194	ANK2/BMPR2/EFNB2/FHOD3/HDAC9/IGFBP5/ISL1/MEF2C/NRG1/QKI/RORA/SLC8A1/SMYD3/UCHL1/ZEB1	15
BP	GO:0033674	positive regulation of kinase activity	17/278	496/18903	0.00113368	0.0199961	0.0158194	BMPR2/CCND1/DDR1/DOCK3/EPHA3/ERBB4/FGF13/HMGA2/IGF1R/MAPT/MEF2C/NRG1/NRG3/PKD2/PRKD1/PTK2/ROBO1	17
BP	GO:0003151	outflow tract morphogenesis	6/278	80/18903	0.00115903	0.0202398	0.0160122	BMPR2/ISL1/MEF2C/ROBO1/ROBO2/ZFPM2	6
BP	GO:0008344	adult locomotory behavior	6/278	80/18903	0.00115903	0.0202398	0.0160122	APP/BTBD9/CHL1/PBX3/UCHL1/ZIC1	6
BP	GO:0009612	response to mechanical stimulus	10/278	211/18903	0.00117447	0.0204078	0.0161451	BTG2/FYN/IGF1R/IGFBP2/MAPK8/NRXN1/PKD2/PTK2/PTN/SLC8A1	10
BP	GO:0007015	actin filament organization	16/278	454/18903	0.00118278	0.0204511	0.0161793	BRAF/CLASP1/CLASP2/COTL1/CTNNA2/DIAPH3/FCHSD2/FER/FHOD3/FMN2/MARCKSL1/PAK3/PHACTR1/PPM1E/SSH2/SVIL	16
BP	GO:0031116	positive regulation of microtubule polymerization	4/278	32/18903	0.00119019	0.0204782	0.0162008	CLASP1/HSPA1A/MAPT/NAV3	4
BP	GO:1902905	positive regulation of supramolecular fiber organization	9/278	176/18903	0.00121249	0.0207361	0.0164048	APP/BRAF/CLASP1/FCHSD2/FER/HSPA1A/MAPT/NAV3/PPM1E	9
BP	GO:0099003	vesicle-mediated transport in synapse	10/278	212/18903	0.00121699	0.0207361	0.0164048	BRAF/BTBD9/CADPS/CASK/EFNB2/ERC2/GSK3B/NLGN1/RIMS2/SYT1	10
BP	GO:0097061	dendritic spine organization	6/278	81/18903	0.00123658	0.0208695	0.0165103	CTNND2/FYN/IGF1R/NLGN1/PAK3/ZNF804A	6
BP	GO:0016055	Wnt signaling pathway	16/278	456/18903	0.00123775	0.0208695	0.0165103	APP/ATP6V0C/CCND1/CDK14/CPE/CTNND2/EXT1/GLI3/GPC6/GSK3B/IGFBP2/ISL1/NXN/PKD2/TNKS/WWOX	16
BP	GO:0033599	regulation of mammary gland epithelial cell proliferation	3/278	15/18903	0.00125591	0.0208695	0.0165103	CCND1/KDM5B/ROBO1	3
BP	GO:0106070	regulation of adenylate cyclase-activating G protein-coupled receptor signaling pathway	3/278	15/18903	0.00125591	0.0208695	0.0165103	ARRDC3/PDE4B/PRKCA	3
BP	GO:0031103	axon regeneration	5/278	55/18903	0.00126644	0.0208695	0.0165103	BRAF/IGF1R/ISL1/PTN/PTPRS	5
BP	GO:0038093	Fc receptor signaling pathway	5/278	55/18903	0.00126644	0.0208695	0.0165103	FER/FYN/MAPK10/MAPK8/PTK2	5
BP	GO:1904645	response to amyloid-beta	5/278	55/18903	0.00126644	0.0208695	0.0165103	APP/CACNA2D1/FYN/GSK3B/IGF1R	5
BP	GO:0198738	cell-cell signaling by wnt	16/278	458/18903	0.00129486	0.0212381	0.016802	APP/ATP6V0C/CCND1/CDK14/CPE/CTNND2/EXT1/GLI3/GPC6/GSK3B/IGFBP2/ISL1/NXN/PKD2/TNKS/WWOX	16
BP	GO:0048708	astrocyte differentiation	6/278	82/18903	0.00131804	0.0214198	0.0169457	APP/ID4/MAPT/NF1/PAX6/VIM	6
BP	GO:0048762	mesenchymal cell differentiation	11/278	252/18903	0.00131814	0.0214198	0.0169457	CLASP1/CLASP2/EPHA3/ERBB4/EXT1/GSK3B/HMGA2/ISL1/MEF2C/NRG1/PTK2	11
BP	GO:0060998	regulation of dendritic spine development	5/278	56/18903	0.00137413	0.0222268	0.0175841	MEF2C/NLGN1/PAK3/PTPRS/SDK1	5
BP	GO:0031644	regulation of nervous system process	8/278	145/18903	0.00138977	0.0223766	0.0177026	APP/CNIH2/DLGAP1/NLGN1/NRXN1/PARD3/RIMS2/TENM4	8
BP	GO:0050768	negative regulation of neurogenesis	8/278	146/18903	0.00145202	0.0232722	0.0184111	DCC/FGF13/ID4/MAP2/NF1/PAX6/PTN/PTPRS	8
BP	GO:0043113	receptor clustering	5/278	57/18903	0.00148843	0.0235044	0.0185949	DLG2/GPHN/NLGN1/NRXN1/PTN	5
BP	GO:0070570	regulation of neuron projection regeneration	4/278	34/18903	0.0015	0.0235044	0.0185949	BRAF/IGF1R/PTN/PTPRS	4
BP	GO:0086004	regulation of cardiac muscle cell contraction	4/278	34/18903	0.0015	0.0235044	0.0185949	ANK2/FGF13/PDE4B/PDE4D	4
BP	GO:0099174	regulation of presynapse organization	4/278	34/18903	0.0015	0.0235044	0.0185949	APP/GPC6/IL1RAPL1/PTPRD	4
BP	GO:1905606	regulation of presynapse assembly	4/278	34/18903	0.0015	0.0235044	0.0185949	APP/GPC6/IL1RAPL1/PTPRD	4
BP	GO:0010715	regulation of extracellular matrix disassembly	3/278	16/18903	0.00152901	0.0238526	0.0188703	CLASP1/CLASP2/DDR1	3
BP	GO:0001933	negative regulation of protein phosphorylation	13/278	338/18903	0.00156787	0.0243505	0.0192642	CDKN1C/DUSP6/HSPB1/NF1/NR2F2/PARD3/PAX6/PDE4D/PPM1E/SLC8A1/SMYD3/UCHL1/YWHAG	13
BP	GO:0003007	heart morphogenesis	11/278	258/18903	0.00158941	0.0245763	0.0194429	BMPR2/CPE/EXT1/ISL1/MEF2C/NRG1/PKD2/PTK2/ROBO1/ROBO2/ZFPM2	11
BP	GO:0042326	negative regulation of phosphorylation	14/278	381/18903	0.00160971	0.024781	0.0196049	CDKN1C/DUSP6/HSPB1/MAPT/NF1/NR2F2/PARD3/PAX6/PDE4D/PPM1E/SLC8A1/SMYD3/UCHL1/YWHAG	14
BP	GO:0001893	maternal placenta development	4/278	35/18903	0.00167418	0.025661	0.020301	BMPR2/LDOC1/NR2F2/PTN	4
BP	GO:0010810	regulation of cell-substrate adhesion	10/278	222/18903	0.0017155	0.02618	0.0207116	BRAF/CASK/CLASP1/CLASP2/DDR1/EPHA3/GSK3B/NF1/PTK2/WDPCP	10
BP	GO:0043535	regulation of blood vessel endothelial cell migration	8/278	150/18903	0.00172352	0.0261885	0.0207183	AKT3/HDAC9/HSPB1/MEF2C/NF1/PLK2/PRKCA/PRKD1	8
BP	GO:0099175	regulation of postsynapse organization	6/278	87/18903	0.0017885	0.0270588	0.0214068	FYN/IL1RAPL1/NLGN1/PAK3/PTPRD/ZNF804A	6
BP	GO:0010470	regulation of gastrulation	3/278	17/18903	0.00183658	0.0274315	0.0217017	CLASP1/CLASP2/TENM4	3
BP	GO:0010763	positive regulation of fibroblast migration	3/278	17/18903	0.00183658	0.0274315	0.0217017	PAK3/PTK2/SLC8A1	3
BP	GO:0055119	relaxation of cardiac muscle	3/278	17/18903	0.00183658	0.0274315	0.0217017	PDE4B/PDE4D/SLC8A1	3
BP	GO:0031112	positive regulation of microtubule polymerization or depolymerization	4/278	36/18903	0.00186192	0.0275127	0.0217659	CLASP1/HSPA1A/MAPT/NAV3	4
BP	GO:0022029	telencephalon cell migration	5/278	60/18903	0.00187337	0.0275127	0.0217659	FGF13/GLI3/NRG1/NRG3/ROBO1	5
BP	GO:0045599	negative regulation of fat cell differentiation	5/278	60/18903	0.00187337	0.0275127	0.0217659	CCDC85B/ID4/RORA/TRIO/ZFPM2	5
BP	GO:2000300	regulation of synaptic vesicle exocytosis	5/278	60/18903	0.00187337	0.0275127	0.0217659	BRAF/CASK/GSK3B/NLGN1/SYT1	5
BP	GO:0001654	eye development	14/278	388/18903	0.00190517	0.0277278	0.0219361	BMPR2/CRB1/DCX/GLI3/KDM5B/MEIS3/NF1/PAX6/PBX3/SDK1/SMOC1/VIM/WDPCP/ZEB1	14
BP	GO:0010721	negative regulation of cell development	9/278	188/18903	0.00191172	0.0277278	0.0219361	DCC/FGF13/GSK3B/ID4/MAP2/NF1/PAX6/PTN/PTPRS	9
BP	GO:1903169	regulation of calcium ion transmembrane transport	9/278	188/18903	0.00191172	0.0277278	0.0219361	ANK2/CACNA2D1/FYN/PDE4B/PDE4D/PKD2/PRKD1/SLC8A1/TSPAN13	9
BP	GO:0046777	protein autophosphorylation	10/278	226/18903	0.00195627	0.0282573	0.022355	DDR1/DYRK1A/ERBB4/FER/FYN/GSK3B/IGF1R/PRKD1/PTK2/STK39	10
BP	GO:0090311	regulation of protein deacetylation	5/278	61/18903	0.00201652	0.0290081	0.022949	DYRK1A/MAPK8/MAPT/NDN/PRKD1	5
BP	GO:0003230	cardiac atrium development	4/278	37/18903	0.00206375	0.0295664	0.0233907	ANK2/BMPR2/IGF1R/ISL1	4
BP	GO:0150063	visual system development	14/278	392/18903	0.00209333	0.0298683	0.0236295	BMPR2/CRB1/DCX/GLI3/KDM5B/MEIS3/NF1/PAX6/PBX3/SDK1/SMOC1/VIM/WDPCP/ZEB1	14
BP	GO:0031102	neuron projection regeneration	5/278	62/18903	0.00216748	0.0306769	0.0242692	BRAF/IGF1R/ISL1/PTN/PTPRS	5
BP	GO:0099601	regulation of neurotransmitter receptor activity	5/278	62/18903	0.00216748	0.0306769	0.0242692	APP/CNIH2/DLGAP1/MEF2C/NLGN1	5
BP	GO:0031334	positive regulation of protein-containing complex assembly	9/278	192/18903	0.00220574	0.0309686	0.0245	CLASP1/FAF1/FCHSD2/FER/GSK3B/HSPA1A/MAPT/NAV3/NRG1	9
BP	GO:0099504	synaptic vesicle cycle	9/278	192/18903	0.00220574	0.0309686	0.0245	BRAF/BTBD9/CADPS/CASK/ERC2/GSK3B/NLGN1/RIMS2/SYT1	9
BP	GO:0050920	regulation of chemotaxis	10/278	230/18903	0.00222363	0.0310954	0.0246003	BMPR2/CAMK1D/EFNB2/HSPB1/PRKD1/PTK2/PTN/ROBO1/ROBO2/STK39	10
BP	GO:1901216	positive regulation of neuron death	6/278	91/18903	0.00224866	0.0313207	0.0247785	EFNB2/FYN/GSK3B/MAPT/NF1/PAK3	6
BP	GO:0048009	insulin-like growth factor receptor signaling pathway	4/278	38/18903	0.00228021	0.0316345	0.0250268	IGF1R/IGFBP2/IGFBP5/PLCB1	4
BP	GO:0045936	negative regulation of phosphate metabolic process	15/278	440/18903	0.00230106	0.0317981	0.0251562	CDKN1C/DUSP6/GSK3B/HSPB1/MAPT/NF1/NR2F2/PARD3/PAX6/PDE4D/PPM1E/SLC8A1/SMYD3/UCHL1/YWHAG	15
BP	GO:0021885	forebrain cell migration	5/278	63/18903	0.00232653	0.032024	0.0253349	FGF13/GLI3/NRG1/NRG3/ROBO1	5
BP	GO:0010563	negative regulation of phosphorus metabolic process	15/278	441/18903	0.00235132	0.0322389	0.0255049	CDKN1C/DUSP6/GSK3B/HSPB1/MAPT/NF1/NR2F2/PARD3/PAX6/PDE4D/PPM1E/SLC8A1/SMYD3/UCHL1/YWHAG	15
BP	GO:0032273	positive regulation of protein polymerization	6/278	92/18903	0.00237648	0.0323312	0.025578	CLASP1/FCHSD2/FER/HSPA1A/MAPT/NAV3	6
BP	GO:0060996	dendritic spine development	6/278	92/18903	0.00237648	0.0323312	0.025578	CTNND2/MEF2C/NLGN1/PAK3/PTPRS/SDK1	6
BP	GO:0050900	leukocyte migration	14/278	398/18903	0.00240426	0.0324989	0.0257106	APP/CAMK1D/CD200/EXT1/FER/FUT9/FYN/NF1/PDE4B/PLCB1/PODXL2/PTK2/PTN/STK39	14
BP	GO:0060079	excitatory postsynaptic potential	7/278	124/18903	0.00240733	0.0324989	0.0257106	APP/GABRB3/GSK3B/MEF2C/NLGN1/NRXN1/RIMS2	7
BP	GO:0051893	regulation of focal adhesion assembly	5/278	64/18903	0.00249389	0.0334105	0.0264318	CLASP1/CLASP2/EPHA3/PTK2/WDPCP	5
BP	GO:0090109	regulation of cell-substrate junction assembly	5/278	64/18903	0.00249389	0.0334105	0.0264318	CLASP1/CLASP2/EPHA3/PTK2/WDPCP	5
BP	GO:0007626	locomotory behavior	9/278	197/18903	0.00262274	0.0348705	0.0275868	APP/ARRDC3/BTBD9/CHL1/NCOA2/NRG1/PBX3/UCHL1/ZIC1	9
BP	GO:0051650	establishment of vesicle localization	9/278	197/18903	0.00262274	0.0348705	0.0275868	ATP9A/CLASP1/CLASP2/CNIH2/EXOC4/EXOC6B/KIF5C/MAP2/NLGN1	9
BP	GO:0051348	negative regulation of transferase activity	11/278	276/18903	0.00268865	0.035612	0.0281734	CDKN1C/GSK3B/HSPB1/MAPT/NF1/NR2F2/PPM1E/SLC8A1/SMYD3/UCHL1/YWHAG	11
BP	GO:0071248	cellular response to metal ion	9/278	198/18903	0.00271318	0.0357246	0.0282625	APP/BRAF/DLG2/MAPK8/MEF2C/NLGN1/PKD2/STK39/SYT1	9
BP	GO:0010038	response to metal ion	13/278	360/18903	0.00271751	0.0357246	0.0282625	APP/BRAF/CCND1/DLG2/GPHN/IGFBP2/MAPK8/MAPT/MEF2C/NLGN1/PKD2/STK39/SYT1	13
BP	GO:0009187	cyclic nucleotide metabolic process	4/278	40/18903	0.00275905	0.036001	0.0284812	PDE10A/PDE4B/PDE4D/RORA	4
BP	GO:1903115	regulation of actin filament-based movement	4/278	40/18903	0.00275905	0.036001	0.0284812	ANK2/FGF13/PDE4B/PDE4D	4
BP	GO:0050657	nucleic acid transport	8/278	163/18903	0.00289227	0.0374608	0.0296361	DDX39B/IGF2BP2/IGF2BP3/KIF5C/QKI/RBFOX1/SARNP/TNKS	8
BP	GO:0050658	RNA transport	8/278	163/18903	0.00289227	0.0374608	0.0296361	DDX39B/IGF2BP2/IGF2BP3/KIF5C/QKI/RBFOX1/SARNP/TNKS	8
BP	GO:0032793	positive regulation of CREB transcription factor activity	3/278	20/18903	0.00298031	0.0380396	0.030094	CAMK1D/CD200/PRKD1	3
BP	GO:0048670	regulation of collateral sprouting	3/278	20/18903	0.00298031	0.0380396	0.030094	DCC/FGF13/PTPRS	3
BP	GO:0060749	mammary gland alveolus development	3/278	20/18903	0.00298031	0.0380396	0.030094	CCND1/DDR1/ERBB4	3
BP	GO:0061377	mammary gland lobule development	3/278	20/18903	0.00298031	0.0380396	0.030094	CCND1/DDR1/ERBB4	3
BP	GO:0033673	negative regulation of kinase activity	10/278	240/18903	0.00302214	0.0384338	0.0304058	CDKN1C/HSPB1/MAPT/NF1/NR2F2/PPM1E/SLC8A1/SMYD3/UCHL1/YWHAG	10
BP	GO:0006903	vesicle targeting	5/278	67/18903	0.00304841	0.0384478	0.0304169	CLASP1/CLASP2/EXOC4/EXOC6B/NLGN1	5
BP	GO:0043954	cellular component maintenance	5/278	67/18903	0.00304841	0.0384478	0.0304169	ERC2/FYN/IGF1R/NLGN1/ZNF804A	5
BP	GO:0032956	regulation of actin cytoskeleton organization	13/278	365/18903	0.00305734	0.0384478	0.0304169	BRAF/CLASP1/CLASP2/COTL1/CTNNA2/EPHA3/FCHSD2/FER/FHOD3/PAK3/PPM1E/SSH2/SVIL	13
BP	GO:0032412	regulation of ion transmembrane transporter activity	11/278	281/18903	0.00308402	0.0384478	0.0304169	ANK2/APP/CACNA2D1/CNIH2/FGF13/MEF2C/NLGN1/PDE4B/PDE4D/PKD2/STK39	11
BP	GO:0051090	regulation of DNA-binding transcription factor activity	15/278	454/18903	0.00309214	0.0384478	0.0304169	APP/CAMK1D/CD200/ESR2/FAF1/FER/GLI3/HSPA1A/MAPK10/MAPK8/NDN/PKD2/PRKD1/PSMA6/ZIC2	15
BP	GO:0008593	regulation of Notch signaling pathway	6/278	97/18903	0.0030993	0.0384478	0.0304169	CBFA2T2/DLK1/ROBO1/ROBO2/SREBF2/TSPAN5	6
BP	GO:0006403	RNA localization	9/278	202/18903	0.00309992	0.0384478	0.0304169	BICD1/DDX39B/IGF2BP2/IGF2BP3/KIF5C/QKI/RBFOX1/SARNP/TNKS	9
BP	GO:0010639	negative regulation of organelle organization	13/278	366/18903	0.0031293	0.0385012	0.0304592	CLASP1/CLASP2/CTNNA2/DYRK1A/FGF13/FHOD3/HSPA1A/MAP2/MAPT/NAV3/SSH2/SVIL/TNKS	13
BP	GO:0051028	mRNA transport	7/278	130/18903	0.00313713	0.0385012	0.0304592	DDX39B/IGF2BP2/IGF2BP3/KIF5C/QKI/SARNP/TNKS	7
BP	GO:0099565	chemical synaptic transmission, postsynaptic	7/278	130/18903	0.00313713	0.0385012	0.0304592	APP/GABRB3/GSK3B/MEF2C/NLGN1/NRXN1/RIMS2	7
BP	GO:0051236	establishment of RNA localization	8/278	166/18903	0.00323385	0.0395499	0.0312888	DDX39B/IGF2BP2/IGF2BP3/KIF5C/QKI/RBFOX1/SARNP/TNKS	8
BP	GO:0048663	neuron fate commitment	5/278	68/18903	0.00325155	0.0396283	0.0313508	GLI3/ISL1/MYT1L/NRG1/PAX6	5
BP	GO:0010595	positive regulation of endothelial cell migration	7/278	131/18903	0.0032736	0.0397589	0.0314542	AKT3/BMPR2/HDAC9/HSPB1/PLK2/PRKCA/PRKD1	7
BP	GO:0014002	astrocyte development	4/278	42/18903	0.00330255	0.0399722	0.0316229	APP/MAPT/NF1/VIM	4
BP	GO:0003177	pulmonary valve development	3/278	21/18903	0.00343955	0.0406492	0.0321585	BMPR2/ROBO1/ROBO2	3
BP	GO:0007042	lysosomal lumen acidification	3/278	21/18903	0.00343955	0.0406492	0.0321585	ATP6V0B/ATP6V0C/RNASEK	3
BP	GO:0007413	axonal fasciculation	3/278	21/18903	0.00343955	0.0406492	0.0321585	CNTN4/EPHA3/NDN	3
BP	GO:0038083	peptidyl-tyrosine autophosphorylation	3/278	21/18903	0.00343955	0.0406492	0.0321585	DDR1/DYRK1A/IGF1R	3
BP	GO:0071498	cellular response to fluid shear stress	3/278	21/18903	0.00343955	0.0406492	0.0321585	MEF2C/PKD2/SREBF2	3
BP	GO:0097062	dendritic spine maintenance	3/278	21/18903	0.00343955	0.0406492	0.0321585	FYN/IGF1R/ZNF804A	3
BP	GO:0106030	neuron projection fasciculation	3/278	21/18903	0.00343955	0.0406492	0.0321585	CNTN4/EPHA3/NDN	3
BP	GO:0061180	mammary gland epithelium development	5/278	69/18903	0.00346426	0.0406674	0.0321729	CCND1/DDR1/ERBB4/KDM5B/ROBO1	5
BP	GO:0150116	regulation of cell-substrate junction organization	5/278	69/18903	0.00346426	0.0406674	0.0321729	CLASP1/CLASP2/EPHA3/PTK2/WDPCP	5
BP	GO:0048639	positive regulation of developmental growth	8/278	168/18903	0.00347844	0.0406977	0.0321969	BMPR2/ERBB4/MAPT/MEF2C/PLCB1/RIMS2/SYT1/ZFPM2	8
BP	GO:0048713	regulation of oligodendrocyte differentiation	4/278	43/18903	0.00359979	0.0418386	0.0330995	ID4/NF1/PTN/TENM4	4
BP	GO:0060412	ventricular septum morphogenesis	4/278	43/18903	0.00359979	0.0418386	0.0330995	BMPR2/ROBO1/ROBO2/ZFPM2	4
BP	GO:0007156	homophilic cell adhesion via plasma membrane adhesion molecules	8/278	170/18903	0.00373713	0.0431491	0.0341363	CADM1/CADM2/CNTN4/PCDH11X/PCDH9/ROBO1/ROBO2/SDK1	8
BP	GO:0030041	actin filament polymerization	8/278	170/18903	0.00373713	0.0431491	0.0341363	COTL1/DIAPH3/FCHSD2/FER/FHOD3/PAK3/SSH2/SVIL	8
BP	GO:0032103	positive regulation of response to external stimulus	15/278	464/18903	0.00378466	0.0435547	0.0344571	APP/BMPR2/BRAF/CADM1/CAMK1D/FYN/HSPB1/IGF1R/PAK3/PRKCA/PRKD1/PTK2/PTN/PUM2/STK39	15
BP	GO:0048863	stem cell differentiation	10/278	248/18903	0.00381322	0.0437399	0.0346036	ERBB4/EXT1/GSK3B/HMGA2/ISL1/MEF2C/MSI2/NRG1/PTN/SOX5	10
BP	GO:1900180	regulation of protein localization to nucleus	7/278	135/18903	0.00386526	0.0441924	0.0349617	DCLK1/FYN/GLI3/GSK3B/NF1/PRKD1/ZIC1	7
BP	GO:0098815	modulation of excitatory postsynaptic potential	4/278	44/18903	0.00391469	0.0444644	0.0351768	APP/NLGN1/NRXN1/RIMS2	4
BP	GO:0003208	cardiac ventricle morphogenesis	5/278	71/18903	0.00391938	0.0444644	0.0351768	CPE/ISL1/MEF2C/NRG1/ZFPM2	5
BP	GO:0035020	regulation of Rac protein signal transduction	3/278	22/18903	0.00393973	0.0444644	0.0351768	AUTS2/GABARAP/NF1	3
BP	GO:0086012	membrane depolarization during cardiac muscle cell action potential	3/278	22/18903	0.00393973	0.0444644	0.0351768	ANK2/CACNA2D1/SLC8A1	3
BP	GO:1903034	regulation of response to wounding	8/278	172/18903	0.00401047	0.0450237	0.0356193	BRAF/CASK/CLASP1/CLASP2/IGF1R/PTK2/PTN/PTPRS	8
BP	GO:0022898	regulation of transmembrane transporter activity	11/278	291/18903	0.00401493	0.0450237	0.0356193	ANK2/APP/CACNA2D1/CNIH2/FGF13/MEF2C/NLGN1/PDE4B/PDE4D/PKD2/STK39	11
BP	GO:0010959	regulation of metal ion transport	14/278	423/18903	0.0041384	0.046233	0.036576	ANK2/CACNA2D1/CASK/DPP10/FGF13/FYN/NKAIN3/PDE4B/PDE4D/PKD2/PRKD1/SLC8A1/STK39/TSPAN13	14
BP	GO:0060411	cardiac septum morphogenesis	5/278	72/18903	0.00416229	0.046233	0.036576	BMPR2/ISL1/ROBO1/ROBO2/ZFPM2	5
BP	GO:1901880	negative regulation of protein depolymerization	5/278	72/18903	0.00416229	0.046233	0.036576	CLASP1/CLASP2/FGF13/NAV3/SVIL	5
BP	GO:0030501	positive regulation of bone mineralization	4/278	45/18903	0.00424771	0.047033	0.0372089	BMPR2/MEF2C/PTN/SLC8A1	4
BP	GO:0060291	long-term synaptic potentiation	6/278	104/18903	0.00437187	0.0482556	0.0381761	APP/BRAF/GSK3B/NF1/PLK2/PTN	6
BP	GO:0051648	vesicle localization	9/278	213/18903	0.00439064	0.0483108	0.0382198	ATP9A/CLASP1/CLASP2/CNIH2/EXOC4/EXOC6B/KIF5C/MAP2/NLGN1	9
BP	GO:0051048	negative regulation of secretion	8/278	175/18903	0.00444911	0.0488012	0.0386078	ATP9A/BRAF/CD200/FRMD4A/IL1RAPL1/NF1/NRG1/STK39	8
BP	GO:0003283	atrial septum development	3/278	23/18903	0.00448191	0.0488556	0.0386508	ANK2/BMPR2/ISL1	3
BP	GO:0046058	cAMP metabolic process	3/278	23/18903	0.00448191	0.0488556	0.0386508	PDE10A/PDE4B/PDE4D	3
BP	GO:0010837	regulation of keratinocyte proliferation	4/278	46/18903	0.00459934	0.0498262	0.0394187	CASK/EFNB2/PRKD1/ZEB1	4
BP	GO:1900271	regulation of long-term synaptic potentiation	4/278	46/18903	0.00459934	0.0498262	0.0394187	APP/GSK3B/NF1/PTN	4
CC	GO:0098984	neuron to neuron synapse	24/278	351/19869	1.75792e-10	6.55705e-08	5.23676e-08	ANKS1B/BMPR2/CADM1/CNIH2/CTNND2/DCC/DCLK1/DLG2/DLGAP1/EFNB2/ERBB4/FYN/GPHN/GRIP1/KALRN/NLGN1/PAK3/PDE4B/PLEKHA5/PSD3/PTPRD/PTPRS/SLC8A1/SYT1	24
CC	GO:0014069	postsynaptic density	22/278	321/19869	9.97344e-10	1.75318e-07	1.40017e-07	ANKS1B/BMPR2/CADM1/CNIH2/CTNND2/DCC/DCLK1/DLG2/DLGAP1/EFNB2/ERBB4/FYN/GPHN/GRIP1/KALRN/NLGN1/PAK3/PDE4B/PLEKHA5/PSD3/PTPRS/SLC8A1	22
CC	GO:0032279	asymmetric synapse	22/278	327/19869	1.41006e-09	1.75318e-07	1.40017e-07	ANKS1B/BMPR2/CADM1/CNIH2/CTNND2/DCC/DCLK1/DLG2/DLGAP1/EFNB2/ERBB4/FYN/GPHN/GRIP1/KALRN/NLGN1/PAK3/PDE4B/PLEKHA5/PSD3/PTPRS/SLC8A1	22
CC	GO:0099572	postsynaptic specialization	22/278	342/19869	3.23924e-09	3.02059e-07	2.41238e-07	ANKS1B/BMPR2/CADM1/CNIH2/CTNND2/DCC/DCLK1/DLG2/DLGAP1/EFNB2/ERBB4/FYN/GPHN/GRIP1/KALRN/NLGN1/PAK3/PDE4B/PLEKHA5/PSD3/PTPRS/SLC8A1	22
CC	GO:0030426	growth cone	15/278	167/19869	1.38589e-08	1.03387e-06	8.25698e-07	APP/ATCAY/AUTS2/DCC/ERC2/EXOC4/FGF13/KIF5C/MAP2/MAPT/PCDH9/PTBP2/PTPRS/STMN4/ZNF804A	15
CC	GO:0030427	site of polarized growth	15/278	173/19869	2.23459e-08	1.38917e-06	1.10945e-06	APP/ATCAY/AUTS2/DCC/ERC2/EXOC4/FGF13/KIF5C/MAP2/MAPT/PCDH9/PTBP2/PTPRS/STMN4/ZNF804A	15
CC	GO:0097060	synaptic membrane	19/278	378/19869	1.74142e-06	9.27931e-05	7.41087e-05	ANK2/CASK/CNIH2/DCC/DLG2/EFNB2/ERBB4/ERC2/GABRB3/GPHN/GRIP1/IL1RAPL1/NLGN1/NRXN1/PTPRD/PTPRS/RIMS2/SLC8A1/SYT1	19
CC	GO:0150034	distal axon	16/278	278/19869	2.07392e-06	9.66967e-05	7.72264e-05	APP/ATCAY/AUTS2/DCC/ERC2/EXOC4/FGF13/KIF5C/MAP2/MAPT/PCDH9/PTBP2/PTPRS/SLC8A1/STMN4/ZNF804A	16
CC	GO:0099568	cytoplasmic region	16/278	285/19869	2.86047e-06	0.000118551	9.468e-05	CLASP1/CLASP2/DCX/DLG2/ERC2/GABARAP/GLI3/HSPB1/KIF1B/KIF5C/MAP2/MAPT/PKD2/RIMS2/UCHL1/WDPCP	16
CC	GO:0098978	glutamatergic synapse	16/278	324/19869	1.44265e-05	0.000538108	0.000429758	CADPS/CNIH2/DLGAP1/EFNB2/ERBB4/ERC2/GSK3B/IL1RAPL1/NLGN1/NRG1/NRG3/PAK3/PLCB1/PLEKHA5/PTPRD/SYT1	16
CC	GO:0044304	main axon	7/278	63/19869	2.75783e-05	0.000935155	0.000746857	APP/DLG2/KCNQ3/MAP2/MAPT/PARD3/ROBO2	7
CC	GO:0005912	adherens junction	11/278	179/19869	4.59024e-05	0.0014268	0.00113951	BMPR2/CCDC85B/CRB1/CTNNA2/CTNND2/DLG2/EFNB2/FRMD4A/FRMD5/MAGI1/PARD3	11
CC	GO:0045211	postsynaptic membrane	13/278	269/19869	0.000114115	0.00327422	0.00261494	ANK2/CNIH2/DCC/DLG2/EFNB2/ERBB4/GABRB3/GPHN/GRIP1/IL1RAPL1/NLGN1/PTPRS/SLC8A1	13
CC	GO:0005938	cell cortex	14/278	312/19869	0.000137185	0.00365499	0.00291904	CLASP1/CLASP2/COTL1/ERC2/EXOC4/EXOC6B/FER/FMN2/PARD3/PKD2/PRKD1/PTK2/RIMS2/WDPCP	14
CC	GO:0043198	dendritic shaft	5/278	38/19869	0.000177914	0.00442413	0.00353331	APP/CNIH2/MAP2/SLC8A1/ZNF804A	5
CC	GO:0099738	cell cortex region	5/278	39/19869	0.000201764	0.00468442	0.00374119	CLASP1/CLASP2/ERC2/PKD2/RIMS2	5
CC	GO:0099634	postsynaptic specialization membrane	8/278	115/19869	0.000215786	0.00468442	0.00374119	CNIH2/DCC/DLG2/EFNB2/ERBB4/GPHN/NLGN1/PTPRS	8
CC	GO:1904115	axon cytoplasm	6/278	62/19869	0.000226568	0.00468442	0.00374119	DLG2/HSPB1/KIF1B/KIF5C/MAPT/UCHL1	6
CC	GO:0043025	neuronal cell body	18/278	497/19869	0.000238617	0.00468442	0.00374119	APP/CADM2/CD200/CTNND2/DLG2/GRIP1/IGF1R/KCNB2/KIF5C/MAP2/MAPT/NDN/NRXN1/PTBP2/PTPRS/SLC8A1/UCHL1/ZNF804A	18
CC	GO:0120111	neuron projection cytoplasm	7/278	90/19869	0.000270265	0.00504045	0.00402553	DLG2/HSPB1/KIF1B/KIF5C/MAP2/MAPT/UCHL1	7
CC	GO:0000220	vacuolar proton-transporting V-type ATPase, V0 domain	3/278	10/19869	0.000302335	0.00537005	0.00428877	ATP6V0B/ATP6V0C/RNASEK	3
CC	GO:0031594	neuromuscular junction	6/278	68/19869	0.000376156	0.00637755	0.0050934	APP/DLG2/FCHSD2/NLGN1/NRG1/PDZRN3	6
CC	GO:0033179	proton-transporting V-type ATPase, V0 domain	3/278	12/19869	0.000542889	0.0087799	0.00701203	ATP6V0B/ATP6V0C/RNASEK	3
CC	GO:0099240	intrinsic component of synaptic membrane	9/278	166/19869	0.000564927	0.0087799	0.00701203	CNIH2/DCC/EFNB2/ERBB4/GPHN/NLGN1/PTPRD/PTPRS/SLC8A1	9
CC	GO:0099060	integral component of postsynaptic specialization membrane	6/278	76/19869	0.000684557	0.0100508	0.00802702	CNIH2/DCC/EFNB2/ERBB4/NLGN1/PTPRS	6
CC	GO:0099061	integral component of postsynaptic density membrane	5/278	51/19869	0.000718115	0.0100508	0.00802702	CNIH2/DCC/EFNB2/ERBB4/PTPRS	5
CC	GO:0032838	plasma membrane bounded cell projection cytoplasm	11/278	246/19869	0.000727537	0.0100508	0.00802702	DCX/DLG2/GABARAP/GLI3/HSPB1/KIF1B/KIF5C/MAP2/MAPT/UCHL1/WDPCP	11
CC	GO:0043197	dendritic spine	9/278	175/19869	0.000824565	0.0106751	0.00852565	ANKS1B/APP/CNIH2/MAPT/NLGN1/PDE4B/PTK2/SLC8A1/ZNF804A	9
CC	GO:0098948	intrinsic component of postsynaptic specialization membrane	6/278	79/19869	0.000840568	0.0106751	0.00852565	CNIH2/DCC/EFNB2/ERBB4/NLGN1/PTPRS	6
CC	GO:0044309	neuron spine	9/278	176/19869	0.000858591	0.0106751	0.00852565	ANKS1B/APP/CNIH2/MAPT/NLGN1/PDE4B/PTK2/SLC8A1/ZNF804A	9
CC	GO:0099146	intrinsic component of postsynaptic density membrane	5/278	54/19869	0.00093442	0.0112432	0.00897931	CNIH2/DCC/EFNB2/ERBB4/PTPRS	5
CC	GO:0042734	presynaptic membrane	8/278	148/19869	0.00115779	0.0134955	0.0107781	CASK/EFNB2/ERBB4/ERC2/NRXN1/PTPRD/RIMS2/SYT1	8
CC	GO:0098858	actin-based cell projection	10/278	223/19869	0.00123018	0.0139048	0.011105	APP/CRB1/EXOC4/FCHSD2/FGF13/FMN2/MAP2/NLGN1/RAPH1/WWOX	10
CC	GO:0099055	integral component of postsynaptic membrane	7/278	118/19869	0.00137007	0.0150305	0.012004	CNIH2/DCC/EFNB2/ERBB4/NLGN1/PTPRS/SLC8A1	7
CC	GO:0099699	integral component of synaptic membrane	8/278	155/19869	0.00155517	0.0162137	0.012949	CNIH2/DCC/EFNB2/ERBB4/NLGN1/PTPRD/PTPRS/SLC8A1	8
CC	GO:0098839	postsynaptic density membrane	6/278	89/19869	0.00156486	0.0162137	0.012949	CNIH2/DCC/DLG2/EFNB2/ERBB4/PTPRS	6
CC	GO:0098936	intrinsic component of postsynaptic membrane	7/278	123/19869	0.0017402	0.0175431	0.0140107	CNIH2/DCC/EFNB2/ERBB4/NLGN1/PTPRS/SLC8A1	7
CC	GO:0097386	glial cell projection	4/278	38/19869	0.00190407	0.0186899	0.0149266	APP/CRB1/FYN/MAPT	4
CC	GO:0098685	Schaffer collateral - CA1 synapse	5/278	72/19869	0.00337254	0.0314489	0.0251165	CASK/DCC/EFNB2/FYN/PTPRD	5
CC	GO:0098982	GABA-ergic synapse	5/278	72/19869	0.00337254	0.0314489	0.0251165	ERBB4/ERC2/NLGN1/NRG1/PLCB1	5
CC	GO:0030658	transport vesicle membrane	9/278	222/19869	0.00417133	0.037949	0.0303078	AP1S2/ATP6V0C/CNIH2/CPE/PTPRN2/PTPRS/SCG3/SREBF2/SYT1	9
CC	GO:0016471	vacuolar proton-transporting V-type ATPase complex	3/278	25/19869	0.0049624	0.0430459	0.0343784	ATP6V0B/ATP6V0C/RNASEK	3
CC	GO:0089717	spanning component of membrane	3/278	25/19869	0.0049624	0.0430459	0.0343784	BMPR2/ERBB4/NLGN1	3
CC	GO:0033177	proton-transporting two-sector ATPase complex, proton-transporting domain	3/278	26/19869	0.0055523	0.0470683	0.0375909	ATP6V0B/ATP6V0C/RNASEK	3
CC	GO:0030315	T-tubule	4/278	52/19869	0.00599559	0.0483546	0.0386181	ANK2/CACNA2D1/IGF1R/SLC8A1	4
CC	GO:0043204	perikaryon	7/278	154/19869	0.00604559	0.0483546	0.0386181	APP/CTNND2/DLG2/GRIP1/KCNB2/NDN/PTPRS	7
CC	GO:0033176	proton-transporting V-type ATPase complex	3/278	27/19869	0.00618249	0.0483546	0.0386181	ATP6V0B/ATP6V0C/RNASEK	3
CC	GO:0005874	microtubule	14/278	466/19869	0.00622257	0.0483546	0.0386181	BICD1/CLASP1/CLASP2/DCX/FGF13/GABARAP/KIF1B/KIF5C/MAP2/MAPT/NAV3/SLC8A1/SVIL/ZNF804A	14
MF	GO:0106310	protein serine kinase activity	17/274	363/18432	3.29512e-05	0.0172664	0.014776	AKT3/BRAF/CAMK1D/CASK/CDK14/DCLK1/DYRK1A/GSK3B/KALRN/MAPK10/MAPK8/PAK3/PLK2/PRKCA/PRKD1/STK39/TRIO	17
MF	GO:0004674	protein serine/threonine kinase activity	18/274	430/18432	8.30186e-05	0.0203421	0.0174081	AKT3/BMPR2/BRAF/CAMK1D/CASK/CDK14/DCLK1/DYRK1A/GSK3B/KALRN/MAPK10/MAPK8/PAK3/PLK2/PRKCA/PRKD1/STK39/TRIO	18
MF	GO:0044325	transmembrane transporter binding	9/274	128/18432	0.000126872	0.0203421	0.0174081	ANK2/DPP10/FGF13/FYN/PDE4B/PDE4D/PKD2/RIMS2/SLC8A1	9
MF	GO:0005520	insulin-like growth factor binding	4/274	19/18432	0.000155283	0.0203421	0.0174081	IGF1R/IGFBP2/IGFBP5/IGFBPL1	4
MF	GO:0002162	dystroglycan binding	3/274	11/18432	0.000490777	0.0396397	0.0339223	CLASP1/CLASP2/MAP2	3
MF	GO:0003714	transcription corepressor activity	10/274	191/18432	0.000593485	0.0396397	0.0339223	BTG2/CBFA2T2/CCND1/HDAC9/HMGA2/HSPA1A/KDM5B/RBFOX2/RERE/ZFPM2	10
MF	GO:0034452	dynactin binding	3/274	12/18432	0.000647193	0.0396397	0.0339223	BICD1/GSK3B/MAPT	3
MF	GO:0004725	protein tyrosine phosphatase activity	7/274	98/18432	0.000649745	0.0396397	0.0339223	DUSP6/PTK2/PTPRD/PTPRG/PTPRN2/PTPRS/SSH2	7
MF	GO:0061629	RNA polymerase II-specific DNA-binding transcription factor binding	14/274	350/18432	0.000794225	0.0396397	0.0339223	FAF1/GRIP1/GSK3B/HDAC9/HMGA2/HSPB1/ID4/ISL1/JMJD1C/MEF2C/NCOA1/NCOA2/PSMA6/ZFPM2	14
MF	GO:0140297	DNA-binding transcription factor binding	17/274	476/18432	0.00081074	0.0396397	0.0339223	FAF1/GRIP1/GSK3B/HDAC9/HMGA2/HSPB1/ID4/ISL1/JMJD1C/MEF2C/NCOA1/NCOA2/NFIA/PSMA6/RBFOX2/TCF12/ZFPM2	17
MF	GO:0031994	insulin-like growth factor I binding	3/274	13/18432	0.000832131	0.0396397	0.0339223	IGF1R/IGFBP2/IGFBP5	3
MF	GO:0042043	neurexin family protein binding	3/274	14/18432	0.00104748	0.0435905	0.0373033	CASK/CPE/NLGN1	3
MF	GO:0004713	protein tyrosine kinase activity	8/274	138/18432	0.00108144	0.0435905	0.0373033	DDR1/DYRK1A/EPHA3/ERBB4/FER/FYN/IGF1R/PTK2	8
MF	GO:0042578	phosphoric ester hydrolase activity	14/274	365/18432	0.00118678	0.0444194	0.0380126	DUSP6/MPPED2/PDE10A/PDE4B/PDE4D/PHLPP1/PLCB1/PPM1E/PTK2/PTPRD/PTPRG/PTPRN2/PTPRS/SSH2	14
MF	GO:0004721	phosphoprotein phosphatase activity	9/274	177/18432	0.00135632	0.0460987	0.0394496	DUSP6/PHLPP1/PPM1E/PTK2/PTPRD/PTPRG/PTPRN2/PTPRS/SSH2	9
MF	GO:0015631	tubulin binding	14/274	375/18432	0.00153011	0.0460987	0.0394496	CLASP1/CLASP2/DCX/FGF13/FYN/GABARAP/KIF1B/KIF5C/MAP2/MAPT/NAV3/NDN/PDE4B/STMN4	14
MF	GO:0019887	protein kinase regulator activity	10/274	218/18432	0.00162008	0.0460987	0.0394496	BMPR2/CCND1/CDKN1C/ERBB4/FAF1/FGF13/HSPB1/NRG1/NRG3/YWHAG	10
MF	GO:0008013	beta-catenin binding	6/274	87/18432	0.00188629	0.0460987	0.0394496	CTNNA2/CTNND2/GLI3/GRIP1/GSK3B/RORA	6
MF	GO:0004115	3',5'-cyclic-AMP phosphodiesterase activity	3/274	17/18432	0.00189333	0.0460987	0.0394496	PDE10A/PDE4B/PDE4D	3
MF	GO:0005001	transmembrane receptor protein tyrosine phosphatase activity	3/274	17/18432	0.00189333	0.0460987	0.0394496	PTPRD/PTPRG/PTPRN2	3
MF	GO:0019198	transmembrane receptor protein phosphatase activity	3/274	17/18432	0.00189333	0.0460987	0.0394496	PTPRD/PTPRG/PTPRN2	3
MF	GO:0000217	DNA secondary structure binding	4/274	36/18432	0.00193544	0.0460987	0.0394496	HMGA2/MAPT/MEF2C/RAD51B	4
		Abbreviation
		BP, biological process
		CC, cell component
		MF, molecular function
		CTX, cortex
		GE, ganglionic eminences

## Sheet: GE
Table S4.List of the GO terms of DEGs for inIPCs in CTX and GE.
ONTOLOGY	ID	Description	GeneRatio	BgRatio	pvalue	p.adjust	qvalue	geneID	Count
BP	GO:0000280	nuclear division	48/135	481/18903	3.91294e-42	8.76106e-39	7.2657e-39	ASPM/AURKA/AURKB/BIRC5/BRCA2/BUB3/CCNB1/CCNB2/CDC20/CDK5RAP2/CENPC/CENPE/CENPF/CKS2/DLGAP5/ESCO2/FBXO5/KIF11/KIF15/KIF20B/KIF22/KIF23/KIF4A/KIFC1/KNSTRN/MAD2L1/MKI67/NDC80/NUF2/NUSAP1/PLK1/PRC1/PSRC1/PTTG1/RAD21/RAD51AP1/SMC1A/SMC2/SMC3/SMC4/SPC25/TACC3/TOP2A/TPX2/UBB/UBE2C/UBE2S/ZWINT	48
BP	GO:0140014	mitotic nuclear division	41/135	325/18903	6.12745e-40	6.85968e-37	5.68885e-37	AURKA/AURKB/BIRC5/BUB3/CCNB1/CDC20/CDK5RAP2/CENPC/CENPE/CENPF/DLGAP5/ESCO2/FBXO5/KIF11/KIF15/KIF20B/KIF22/KIF23/KIF4A/KIFC1/KNSTRN/MAD2L1/MKI67/NDC80/NUF2/NUSAP1/PLK1/PRC1/PSRC1/PTTG1/RAD21/SMC1A/SMC2/SMC3/SMC4/SPC25/TACC3/TPX2/UBE2C/UBE2S/ZWINT	41
BP	GO:0000070	mitotic sister chromatid segregation	35/135	204/18903	7.80246e-39	5.82324e-36	4.82931e-36	AURKB/BIRC5/BUB3/CCNB1/CDC20/CDK5RAP2/CENPC/CENPE/CENPF/DLGAP5/ESCO2/FBXO5/KIF11/KIF22/KIF23/KIF4A/KIFC1/KNSTRN/MAD2L1/NDC80/NUF2/NUSAP1/PLK1/PRC1/PSRC1/PTTG1/RAD21/SMC1A/SMC2/SMC3/SMC4/SPC25/TACC3/UBE2C/ZWINT	35
BP	GO:0000819	sister chromatid segregation	36/135	239/18903	8.15526e-38	4.56491e-35	3.78576e-35	AURKB/BIRC5/BUB3/CCNB1/CDC20/CDK5RAP2/CENPC/CENPE/CENPF/DLGAP5/ESCO2/FBXO5/KIF11/KIF22/KIF23/KIF4A/KIFC1/KNSTRN/MAD2L1/NDC80/NUF2/NUSAP1/PLK1/PRC1/PSRC1/PTTG1/RAD21/SMC1A/SMC2/SMC3/SMC4/SPC25/TACC3/TOP2A/UBE2C/ZWINT	36
BP	GO:0098813	nuclear chromosome segregation	36/135	321/18903	4.56383e-33	2.04368e-30	1.69486e-30	AURKB/BIRC5/BUB3/CCNB1/CDC20/CDK5RAP2/CENPC/CENPE/CENPF/DLGAP5/ESCO2/FBXO5/KIF11/KIF22/KIF23/KIF4A/KIFC1/KNSTRN/MAD2L1/NDC80/NUF2/NUSAP1/PLK1/PRC1/PSRC1/PTTG1/RAD21/SMC1A/SMC2/SMC3/SMC4/SPC25/TACC3/TOP2A/UBE2C/ZWINT	36
BP	GO:0007059	chromosome segregation	38/135	382/18903	5.90425e-33	2.20327e-30	1.82721e-30	AURKB/BIRC5/BRCA1/BUB3/CCNB1/CDC20/CDK5RAP2/CENPC/CENPE/CENPF/DLGAP5/ESCO2/FBXO5/KIF11/KIF22/KIF23/KIF4A/KIFC1/KNSTRN/MAD2L1/MKI67/NDC80/NUF2/NUSAP1/PLK1/PRC1/PSRC1/PTTG1/RAD21/SMC1A/SMC2/SMC3/SMC4/SPC25/TACC3/TOP2A/UBE2C/ZWINT	38
BP	GO:0044772	mitotic cell cycle phase transition	39/135	473/18903	1.06815e-30	3.41655e-28	2.83341e-28	ATAD5/AURKA/AURKB/BIRC5/BRCA1/BUB3/CALM2/CCNA2/CCNB1/CCNB2/CCND2/CDC20/CDK1/CDK5RAP2/CDK6/CDKN3/CENPE/CENPF/CKS1B/CKS2/CLSPN/DBF4/DLGAP5/EZH2/FBXO5/GTSE1/MAD2L1/NDC80/NUF2/PLK1/RAD21/RNASEH2B/RRM1/RRM2/SPC25/TACC3/UBE2C/UBE2S/ZWINT	39
BP	GO:0007051	spindle organization	28/135	195/18903	9.1155e-29	2.5512e-26	2.11576e-26	ASPM/AURKA/AURKB/BIRC5/CCNB1/CCNB2/CDC20/CENPE/DLGAP5/EZR/FBXO5/KIF11/KIF15/KIF23/KIF4A/KIFC1/KNSTRN/NDC80/NUF2/PLK1/PRC1/PSRC1/SMC1A/SMC3/SPC25/TACC3/TPX2/TUBB	28
BP	GO:1901987	regulation of cell cycle phase transition	35/135	453/18903	1.62709e-26	4.03873e-24	3.34939e-24	ATAD5/AURKA/AURKB/BIRC5/BRCA1/BRCA2/BUB3/CCNB1/CCND2/CDC20/CDK1/CDK5RAP2/CENPE/CENPF/CLSPN/DBF4/DLGAP5/EZH2/FBXO5/GTSE1/MAD2L1/MN1/NDC80/NUF2/PBK/PLK1/RAD21/RHNO1/RNASEH2B/RRM1/RRM2/SOX2/SPC25/UBE2C/ZWINT	35
BP	GO:1902850	microtubule cytoskeleton organization involved in mitosis	25/135	163/18903	1.80381e-26	4.03873e-24	3.34939e-24	AURKA/AURKB/BIRC5/CCNB1/CDC20/CDK5RAP2/CENPE/DLGAP5/KIF11/KIF15/KIF23/KIF4A/KIFC1/MAD2L1/NDC80/NUF2/NUSAP1/PLK1/PRC1/PSRC1/SMC1A/SMC3/SPC25/TACC3/TPX2	25
BP	GO:1905818	regulation of chromosome separation	22/135	111/18903	5.73337e-26	1.167e-23	9.67815e-24	AURKB/BIRC5/BUB3/CCNB1/CDC20/CDK5RAP2/CENPE/CENPF/DLGAP5/FBXO5/MAD2L1/NDC80/NUF2/PLK1/PTTG1/RAD21/SMC2/SMC4/SPC25/TACC3/UBE2C/ZWINT	22
BP	GO:0051983	regulation of chromosome segregation	23/135	132/18903	9.68309e-26	1.8067e-23	1.49833e-23	AURKB/BIRC5/BUB3/CCNB1/CDC20/CDK5RAP2/CENPE/CENPF/DLGAP5/FBXO5/MAD2L1/MKI67/NDC80/NUF2/PLK1/PTTG1/RAD21/SMC2/SMC4/SPC25/TACC3/UBE2C/ZWINT	23
BP	GO:0051304	chromosome separation	23/135	135/18903	1.67459e-25	2.88416e-23	2.39189e-23	AURKB/BIRC5/BUB3/CCNB1/CDC20/CDK5RAP2/CENPE/CENPF/DLGAP5/FBXO5/MAD2L1/NDC80/NUF2/PLK1/PTTG1/RAD21/SMC2/SMC4/SPC25/TACC3/TOP2A/UBE2C/ZWINT	23
BP	GO:0007052	mitotic spindle organization	22/135	133/18903	3.98972e-24	6.38069e-22	5.29162e-22	AURKA/AURKB/BIRC5/CCNB1/CDC20/CENPE/DLGAP5/KIF11/KIF15/KIF23/KIF4A/KIFC1/NDC80/NUF2/PLK1/PRC1/PSRC1/SMC1A/SMC3/SPC25/TACC3/TPX2	22
BP	GO:0010965	regulation of mitotic sister chromatid separation	20/135	98/18903	5.94758e-24	8.87775e-22	7.36248e-22	AURKB/BIRC5/BUB3/CCNB1/CDC20/CDK5RAP2/CENPE/CENPF/DLGAP5/FBXO5/MAD2L1/NDC80/NUF2/PLK1/PTTG1/RAD21/SPC25/TACC3/UBE2C/ZWINT	20
BP	GO:0051306	mitotic sister chromatid separation	20/135	101/18903	1.14155e-23	1.59745e-21	1.32479e-21	AURKB/BIRC5/BUB3/CCNB1/CDC20/CDK5RAP2/CENPE/CENPF/DLGAP5/FBXO5/MAD2L1/NDC80/NUF2/PLK1/PTTG1/RAD21/SPC25/TACC3/UBE2C/ZWINT	20
BP	GO:0033045	regulation of sister chromatid segregation	20/135	107/18903	3.94485e-23	5.1956e-21	4.3088e-21	AURKB/BIRC5/BUB3/CCNB1/CDC20/CDK5RAP2/CENPE/CENPF/DLGAP5/FBXO5/MAD2L1/NDC80/NUF2/PLK1/PTTG1/RAD21/SPC25/TACC3/UBE2C/ZWINT	20
BP	GO:0033046	negative regulation of sister chromatid segregation	16/135	51/18903	1.06469e-22	1.19192e-20	9.88482e-21	AURKB/BIRC5/BUB3/CCNB1/CDC20/CDK5RAP2/CENPF/FBXO5/MAD2L1/NDC80/NUF2/PLK1/PTTG1/RAD21/SPC25/ZWINT	16
BP	GO:0033048	negative regulation of mitotic sister chromatid segregation	16/135	51/18903	1.06469e-22	1.19192e-20	9.88482e-21	AURKB/BIRC5/BUB3/CCNB1/CDC20/CDK5RAP2/CENPF/FBXO5/MAD2L1/NDC80/NUF2/PLK1/PTTG1/RAD21/SPC25/ZWINT	16
BP	GO:2000816	negative regulation of mitotic sister chromatid separation	16/135	51/18903	1.06469e-22	1.19192e-20	9.88482e-21	AURKB/BIRC5/BUB3/CCNB1/CDC20/CDK5RAP2/CENPF/FBXO5/MAD2L1/NDC80/NUF2/PLK1/PTTG1/RAD21/SPC25/ZWINT	16
BP	GO:1901990	regulation of mitotic cell cycle phase transition	29/135	354/18903	1.11941e-22	1.1935e-20	9.89794e-21	ATAD5/AURKA/AURKB/BIRC5/BRCA1/BUB3/CCNB1/CCND2/CDC20/CDK1/CDK5RAP2/CENPE/CENPF/CLSPN/DLGAP5/EZH2/FBXO5/GTSE1/MAD2L1/NDC80/NUF2/PLK1/RAD21/RNASEH2B/RRM1/RRM2/SPC25/UBE2C/ZWINT	29
BP	GO:0007091	metaphase/anaphase transition of mitotic cell cycle	19/135	95/18903	1.28594e-22	1.30874e-20	1.08536e-20	AURKB/BIRC5/BUB3/CCNB1/CDC20/CDK5RAP2/CENPE/CENPF/DLGAP5/FBXO5/MAD2L1/NDC80/NUF2/PLK1/RAD21/SPC25/TACC3/UBE2C/ZWINT	19
BP	GO:0045787	positive regulation of cell cycle	29/135	362/18903	2.10318e-22	1.94958e-20	1.61682e-20	ATAD5/AURKA/AURKB/BIRC5/BRCA2/CCNB1/CCND2/CDK1/CKS1B/CKS2/DBF4/DLGAP5/EZH2/FBXO5/KIF20B/KIF23/MAD2L1/NDC80/NUSAP1/PBK/PSRC1/RAD21/RAD51AP1/RHNO1/RRM1/RRM2/SMC2/SMC4/UBE2C	29
BP	GO:0051985	negative regulation of chromosome segregation	16/135	53/18903	2.17684e-22	1.94958e-20	1.61682e-20	AURKB/BIRC5/BUB3/CCNB1/CDC20/CDK5RAP2/CENPF/FBXO5/MAD2L1/NDC80/NUF2/PLK1/PTTG1/RAD21/SPC25/ZWINT	16
BP	GO:1905819	negative regulation of chromosome separation	16/135	53/18903	2.17684e-22	1.94958e-20	1.61682e-20	AURKB/BIRC5/BUB3/CCNB1/CDC20/CDK5RAP2/CENPF/FBXO5/MAD2L1/NDC80/NUF2/PLK1/PTTG1/RAD21/SPC25/ZWINT	16
BP	GO:0044784	metaphase/anaphase transition of cell cycle	19/135	98/18903	2.43014e-22	2.09272e-20	1.73553e-20	AURKB/BIRC5/BUB3/CCNB1/CDC20/CDK5RAP2/CENPE/CENPF/DLGAP5/FBXO5/MAD2L1/NDC80/NUF2/PLK1/RAD21/SPC25/TACC3/UBE2C/ZWINT	19
BP	GO:0007088	regulation of mitotic nuclear division	20/135	118/18903	3.15929e-22	2.61987e-20	2.1727e-20	AURKA/AURKB/BIRC5/BUB3/CCNB1/CDC20/CDK5RAP2/CENPF/DLGAP5/FBXO5/KIF20B/MAD2L1/MKI67/NDC80/NUF2/NUSAP1/PLK1/RAD21/SPC25/ZWINT	20
BP	GO:0033047	regulation of mitotic sister chromatid segregation	16/135	56/18903	5.99937e-22	4.79736e-20	3.97853e-20	AURKB/BIRC5/BUB3/CCNB1/CDC20/CDK5RAP2/CENPF/FBXO5/MAD2L1/NDC80/NUF2/PLK1/PTTG1/RAD21/SPC25/ZWINT	16
BP	GO:0051783	regulation of nuclear division	21/135	145/18903	8.50256e-22	6.56457e-20	5.44411e-20	AURKA/AURKB/BIRC5/BUB3/CCNB1/CDC20/CDK5RAP2/CENPF/DLGAP5/FBXO5/KIF20B/MAD2L1/MKI67/NDC80/NUF2/NUSAP1/PLK1/RAD21/RAD51AP1/SPC25/ZWINT	21
BP	GO:0033044	regulation of chromosome organization	25/135	252/18903	1.1904e-21	8.88434e-20	7.36794e-20	AURKB/BIRC5/BUB3/CCNB1/CDC20/CDK5RAP2/CENPE/CENPF/DLGAP5/DNMT1/FBXO5/HNRNPA1/MAD2L1/NDC80/NUF2/PLK1/PTTG1/RAD21/SMC2/SMC4/SPC25/TACC3/TOP2A/UBE2C/ZWINT	25
BP	GO:0045841	negative regulation of mitotic metaphase/anaphase transition	15/135	48/18903	2.582e-21	1.80803e-19	1.49943e-19	AURKB/BIRC5/BUB3/CCNB1/CDC20/CDK5RAP2/CENPF/FBXO5/MAD2L1/NDC80/NUF2/PLK1/RAD21/SPC25/ZWINT	15
BP	GO:0090068	positive regulation of cell cycle process	25/135	260/18903	2.58406e-21	1.80803e-19	1.49943e-19	ATAD5/AURKA/AURKB/BIRC5/CCNB1/CCND2/CDK1/DBF4/DLGAP5/EZH2/FBXO5/KIF20B/KIF23/MAD2L1/NDC80/NUSAP1/PBK/RAD21/RAD51AP1/RHNO1/RRM1/RRM2/SMC2/SMC4/UBE2C	25
BP	GO:0030071	regulation of mitotic metaphase/anaphase transition	18/135	92/18903	2.7319e-21	1.85356e-19	1.53719e-19	AURKB/BIRC5/BUB3/CCNB1/CDC20/CDK5RAP2/CENPE/CENPF/DLGAP5/FBXO5/MAD2L1/NDC80/NUF2/PLK1/RAD21/SPC25/UBE2C/ZWINT	18
BP	GO:1902099	regulation of metaphase/anaphase transition of cell cycle	18/135	95/18903	5.07862e-21	3.34442e-19	2.77358e-19	AURKB/BIRC5/BUB3/CCNB1/CDC20/CDK5RAP2/CENPE/CENPF/DLGAP5/FBXO5/MAD2L1/NDC80/NUF2/PLK1/RAD21/SPC25/UBE2C/ZWINT	18
BP	GO:1902100	negative regulation of metaphase/anaphase transition of cell cycle	15/135	50/18903	5.2527e-21	3.36023e-19	2.7867e-19	AURKB/BIRC5/BUB3/CCNB1/CDC20/CDK5RAP2/CENPF/FBXO5/MAD2L1/NDC80/NUF2/PLK1/RAD21/SPC25/ZWINT	15
BP	GO:2001251	negative regulation of chromosome organization	18/135	97/18903	7.58473e-21	4.71728e-19	3.91213e-19	AURKB/BIRC5/BUB3/CCNB1/CDC20/CDK5RAP2/CENPF/FBXO5/HNRNPA1/MAD2L1/NDC80/NUF2/PLK1/PTTG1/RAD21/SPC25/TOP2A/ZWINT	18
BP	GO:1901988	negative regulation of cell cycle phase transition	25/135	272/18903	7.87366e-21	4.76463e-19	3.95139e-19	AURKB/BIRC5/BRCA1/BRCA2/BUB3/CCNB1/CDC20/CDK1/CDK5RAP2/CENPF/CLSPN/EZH2/FBXO5/GTSE1/MAD2L1/NDC80/NUF2/PBK/PLK1/RAD21/RHNO1/RNASEH2B/SOX2/SPC25/ZWINT	25
BP	GO:0010948	negative regulation of cell cycle process	26/135	318/18903	2.38598e-20	1.40585e-18	1.16589e-18	AURKB/BIRC5/BRCA1/BRCA2/BUB3/CCNB1/CDC20/CDK1/CDK5RAP2/CENPF/CLSPN/EZH2/FBXO5/GTSE1/MAD2L1/NDC80/NUF2/PBK/PLK1/PTTG1/RAD21/RHNO1/RNASEH2B/SOX2/SPC25/ZWINT	26
BP	GO:0045839	negative regulation of mitotic nuclear division	15/135	56/18903	3.6593e-20	2.10081e-18	1.74224e-18	AURKB/BIRC5/BUB3/CCNB1/CDC20/CDK5RAP2/CENPF/FBXO5/MAD2L1/NDC80/NUF2/PLK1/RAD21/SPC25/ZWINT	15
BP	GO:0051225	spindle assembly	19/135	128/18903	5.1645e-20	2.89083e-18	2.39742e-18	ASPM/AURKA/AURKB/BIRC5/CCNB2/CDC20/FBXO5/KIF11/KIF15/KIF23/KIF4A/KIFC1/NDC80/PLK1/PRC1/SMC1A/SMC3/TPX2/TUBB	19
BP	GO:0045786	negative regulation of cell cycle	28/135	405/18903	6.46463e-20	3.53032e-18	2.92775e-18	AURKB/BIRC5/BRCA1/BRCA2/BUB3/CCNB1/CDC20/CDK1/CDK5RAP2/CDK6/CENPF/CLSPN/EZH2/FBXO5/GMNN/GTSE1/MAD2L1/NDC80/NUF2/PBK/PLK1/PTTG1/RAD21/RHNO1/RNASEH2B/SOX2/SPC25/ZWINT	28
BP	GO:0000075	cell cycle checkpoint signaling	21/135	186/18903	1.7726e-19	9.44963e-18	7.83674e-18	AURKB/BIRC5/BRCA1/BRCA2/BUB3/CCNB1/CDC20/CDK1/CDK5RAP2/CENPF/CLSPN/GTSE1/MAD2L1/NDC80/NUF2/PBK/PLK1/RHNO1/RNASEH2B/SPC25/ZWINT	21
BP	GO:0051784	negative regulation of nuclear division	15/135	63/18903	2.63697e-19	1.37306e-17	1.1387e-17	AURKB/BIRC5/BUB3/CCNB1/CDC20/CDK5RAP2/CENPF/FBXO5/MAD2L1/NDC80/NUF2/PLK1/RAD21/SPC25/ZWINT	15
BP	GO:0140694	non-membrane-bounded organelle assembly	26/135	386/18903	3.02734e-18	1.54051e-16	1.27757e-16	ASPM/AURKA/AURKB/BIRC5/BRCA1/CCNB2/CDC20/CDK5RAP2/CENPC/CENPE/CENPF/DLGAP5/EZR/FBXO5/KIF11/KIF15/KIF23/KIF4A/KIFC1/NDC80/PLK1/PRC1/SMC1A/SMC3/TPX2/TUBB	26
BP	GO:0007094	mitotic spindle assembly checkpoint signaling	13/135	46/18903	5.80167e-18	2.76382e-16	2.29208e-16	AURKB/BIRC5/BUB3/CCNB1/CDC20/CDK5RAP2/CENPF/MAD2L1/NDC80/NUF2/PLK1/SPC25/ZWINT	13
BP	GO:0071173	spindle assembly checkpoint signaling	13/135	46/18903	5.80167e-18	2.76382e-16	2.29208e-16	AURKB/BIRC5/BUB3/CCNB1/CDC20/CDK5RAP2/CENPF/MAD2L1/NDC80/NUF2/PLK1/SPC25/ZWINT	13
BP	GO:0071174	mitotic spindle checkpoint signaling	13/135	46/18903	5.80167e-18	2.76382e-16	2.29208e-16	AURKB/BIRC5/BUB3/CCNB1/CDC20/CDK5RAP2/CENPF/MAD2L1/NDC80/NUF2/PLK1/SPC25/ZWINT	13
BP	GO:0031577	spindle checkpoint signaling	13/135	47/18903	7.97183e-18	3.71853e-16	3.08384e-16	AURKB/BIRC5/BUB3/CCNB1/CDC20/CDK5RAP2/CENPF/MAD2L1/NDC80/NUF2/PLK1/SPC25/ZWINT	13
BP	GO:0140013	meiotic nuclear division	20/135	194/18903	8.43359e-18	3.73197e-16	3.09499e-16	ASPM/AURKA/BRCA2/CCNB2/CDC20/CENPC/CKS2/FBXO5/NDC80/NUF2/PLK1/PTTG1/RAD21/RAD51AP1/SMC1A/SMC2/SMC3/SMC4/TOP2A/UBB	20
BP	GO:1901991	negative regulation of mitotic cell cycle phase transition	20/135	194/18903	8.43359e-18	3.73197e-16	3.09499e-16	AURKB/BIRC5/BRCA1/BUB3/CCNB1/CDC20/CDK1/CDK5RAP2/CENPF/CLSPN/EZH2/FBXO5/GTSE1/MAD2L1/NDC80/NUF2/PLK1/RAD21/SPC25/ZWINT	20
BP	GO:0007093	mitotic cell cycle checkpoint signaling	18/135	141/18903	8.50069e-18	3.73197e-16	3.09499e-16	AURKB/BIRC5/BRCA1/BUB3/CCNB1/CDC20/CDK1/CDK5RAP2/CENPF/CLSPN/GTSE1/MAD2L1/NDC80/NUF2/PBK/PLK1/SPC25/ZWINT	18
BP	GO:1903046	meiotic cell cycle process	20/135	212/18903	4.89247e-17	2.10658e-15	1.74703e-15	ASPM/AURKA/BRCA2/CCNB2/CDC20/CENPC/CKS2/FBXO5/NDC80/NUF2/PLK1/PTTG1/RAD21/RAD51AP1/SMC1A/SMC2/SMC3/SMC4/TOP2A/UBB	20
BP	GO:0045930	negative regulation of mitotic cell cycle	21/135	246/18903	5.95205e-17	2.51446e-15	2.08529e-15	AURKB/BIRC5/BRCA1/BUB3/CCNB1/CDC20/CDK1/CDK5RAP2/CENPF/CLSPN/EZH2/FBXO5/GTSE1/MAD2L1/NDC80/NUF2/PBK/PLK1/RAD21/SPC25/ZWINT	21
BP	GO:0051321	meiotic cell cycle	21/135	285/18903	1.17892e-15	4.88817e-14	4.05385e-14	ASPM/AURKA/BRCA2/BUB3/CCNB2/CDC20/CENPC/CKS2/FBXO5/NDC80/NUF2/PLK1/PTTG1/RAD21/RAD51AP1/SMC1A/SMC2/SMC3/SMC4/TOP2A/UBB	21
BP	GO:0044839	cell cycle G2/M phase transition	17/135	157/18903	1.22953e-15	5.00532e-14	4.151e-14	ATAD5/AURKA/AURKB/BRCA1/CALM2/CCNA2/CCNB1/CCNB2/CDK1/CENPF/CLSPN/FBXO5/NDC80/PLK1/RAD21/RNASEH2B/RRM1	17
BP	GO:0006260	DNA replication	21/135	286/18903	1.26494e-15	5.05751e-14	4.19428e-14	ATAD5/BRCA1/BRCA2/CCNA2/CDK1/CHAF1A/DBF4/DUT/ESCO2/FBXO5/GMNN/MCM10/MCM4/NUCKS1/PCNA/PRIM1/RFC3/RPA3/RRM1/RRM2/SMC3	21
BP	GO:0010639	negative regulation of organelle organization	23/135	366/18903	1.46487e-15	5.75412e-14	4.77199e-14	AURKB/BIRC5/BRCA1/BUB3/CCNB1/CDC20/CDK5RAP2/CENPF/CKAP2/FBXO5/HNRNPA1/MAD2L1/NDC80/NUF2/PFN2/PLK1/PTTG1/RAD21/SLC25A6/SPC25/TOP2A/TPX2/ZWINT	23
BP	GO:0090307	mitotic spindle assembly	13/135	74/18903	5.0409e-15	1.94596e-13	1.61382e-13	AURKB/BIRC5/CDC20/KIF11/KIF15/KIF23/KIF4A/KIFC1/PLK1/PRC1/SMC1A/SMC3/TPX2	13
BP	GO:0008608	attachment of spindle microtubules to kinetochore	10/135	43/18903	3.86384e-13	1.46629e-11	1.21602e-11	AURKB/BIRC5/BUB3/CCNB1/CENPC/CENPE/KNSTRN/NDC80/NUF2/SPC25	10
BP	GO:1902749	regulation of cell cycle G2/M phase transition	13/135	110/18903	1.02817e-12	3.83677e-11	3.1819e-11	ATAD5/AURKA/AURKB/BRCA1/CCNB1/CDK1/CENPF/CLSPN/FBXO5/PLK1/RAD21/RNASEH2B/RRM1	13
BP	GO:1901976	regulation of cell cycle checkpoint	10/135	48/18903	1.27893e-12	4.69431e-11	3.89307e-11	AURKB/BIRC5/BRCA1/BRCA2/CCNB1/CDK5RAP2/MAD2L1/NDC80/PBK/RNASEH2B	10
BP	GO:0050000	chromosome localization	12/135	89/18903	1.59326e-12	5.75372e-11	4.77166e-11	AURKB/BIRC5/CCNB1/CENPC/CENPE/CENPF/DLGAP5/KIF22/KIFC1/NDC80/NUF2/PSRC1	12
BP	GO:0000086	G2/M transition of mitotic cell cycle	14/135	142/18903	1.66931e-12	5.93269e-11	4.92009e-11	AURKA/AURKB/BRCA1/CALM2/CCNA2/CCNB1/CDK1/CENPF/CLSPN/FBXO5/PLK1/RAD21/RNASEH2B/RRM1	14
BP	GO:0051383	kinetochore organization	8/135	23/18903	2.45879e-12	8.60191e-11	7.13371e-11	CENPC/CENPE/CENPF/DLGAP5/NDC80/NUF2/SMC2/SMC4	8
BP	GO:0051310	metaphase plate congression	11/135	71/18903	2.90029e-12	9.99038e-11	8.2852e-11	AURKB/BIRC5/CCNB1/CENPC/CENPE/CENPF/KIF22/KIFC1/NDC80/NUF2/PSRC1	11
BP	GO:0010389	regulation of G2/M transition of mitotic cell cycle	12/135	99/18903	5.84099e-12	1.98151e-10	1.6433e-10	AURKA/AURKB/BRCA1/CCNB1/CDK1/CENPF/CLSPN/FBXO5/PLK1/RAD21/RNASEH2B/RRM1	12
BP	GO:0007080	mitotic metaphase plate congression	10/135	57/18903	7.99756e-12	2.67262e-10	2.21645e-10	AURKB/BIRC5/CCNB1/CENPC/CENPE/KIF22/KIFC1/NDC80/NUF2/PSRC1	10
BP	GO:0007127	meiosis I	13/135	131/18903	9.92264e-12	3.26717e-10	2.70952e-10	AURKA/BRCA2/CCNB2/CENPC/CKS2/FBXO5/NDC80/PLK1/PTTG1/RAD21/RAD51AP1/TOP2A/UBB	13
BP	GO:0051303	establishment of chromosome localization	11/135	82/18903	1.48414e-11	4.81594e-10	3.99395e-10	AURKB/BIRC5/CCNB1/CENPC/CENPE/CENPF/KIF22/KIFC1/NDC80/NUF2/PSRC1	11
BP	GO:0006275	regulation of DNA replication	13/135	136/18903	1.60385e-11	5.13002e-10	4.25442e-10	ATAD5/BRCA2/CCNA2/CDK1/DBF4/ESCO2/FBXO5/GMNN/MCM4/NUCKS1/PCNA/RFC3/SMC3	13
BP	GO:0061982	meiosis I cell cycle process	13/135	137/18903	1.76134e-11	5.55444e-10	4.60639e-10	AURKA/BRCA2/CCNB2/CENPC/CKS2/FBXO5/NDC80/PLK1/PTTG1/RAD21/RAD51AP1/TOP2A/UBB	13
BP	GO:0006261	DNA-templated DNA replication	13/135	166/18903	1.99391e-10	6.2005e-09	5.14218e-09	ATAD5/BRCA1/BRCA2/DBF4/FBXO5/GMNN/MCM10/MCM4/NUCKS1/PCNA/PRIM1/RFC3/RRM1	13
BP	GO:0051656	establishment of organelle localization	19/135	437/18903	3.09433e-10	9.4907e-09	7.87081e-09	AURKB/BIRC5/CCNB1/CDK5RAP2/CENPC/CENPE/CENPF/EZR/KIF22/KIFC1/LMNB1/MAD2L1/NDC80/NUF2/NUSAP1/PLK1/PSRC1/SYNE2/UBB	19
BP	GO:0051231	spindle elongation	6/135	14/18903	3.39947e-10	1.02857e-08	8.5301e-09	AURKB/BIRC5/KIF11/KIF23/KIF4A/PRC1	6
BP	GO:0045132	meiotic chromosome segregation	10/135	101/18903	2.72883e-09	8.14648e-08	6.75602e-08	CENPC/NUF2/PLK1/PTTG1/RAD21/SMC1A/SMC2/SMC3/SMC4/TOP2A	10
BP	GO:0007143	female meiotic nuclear division	7/135	33/18903	2.96474e-09	8.73427e-08	7.24348e-08	AURKA/CCNB2/FBXO5/NDC80/PLK1/TOP2A/UBB	7
BP	GO:0051315	attachment of mitotic spindle microtubules to kinetochore	6/135	21/18903	5.89579e-09	1.65008e-07	1.36844e-07	AURKB/BIRC5/CENPC/CENPE/NDC80/NUF2	6
BP	GO:0090231	regulation of spindle checkpoint	6/135	21/18903	5.89579e-09	1.65008e-07	1.36844e-07	AURKB/BIRC5/CCNB1/CDK5RAP2/MAD2L1/NDC80	6
BP	GO:0090266	regulation of mitotic cell cycle spindle assembly checkpoint	6/135	21/18903	5.89579e-09	1.65008e-07	1.36844e-07	AURKB/BIRC5/CCNB1/CDK5RAP2/MAD2L1/NDC80	6
BP	GO:1903504	regulation of mitotic spindle checkpoint	6/135	21/18903	5.89579e-09	1.65008e-07	1.36844e-07	AURKB/BIRC5/CCNB1/CDK5RAP2/MAD2L1/NDC80	6
BP	GO:0051256	mitotic spindle midzone assembly	5/135	11/18903	7.69799e-09	2.12788e-07	1.76469e-07	AURKB/BIRC5/KIF23/KIF4A/PRC1	5
BP	GO:0034502	protein localization to chromosome	10/135	115/18903	9.73015e-09	2.6568e-07	2.20333e-07	AURKB/BRCA2/BUB3/CDK1/ESCO2/EZH2/NDC80/PLK1/RAD21/VRK1	10
BP	GO:0000910	cytokinesis	12/135	187/18903	9.88922e-09	2.66771e-07	2.21238e-07	AURKA/AURKB/BIRC5/BRCA2/CALM2/CKAP2/KIF20B/KIF23/KIF4A/NUSAP1/PLK1/PRC1	12
BP	GO:0000079	regulation of cyclin-dependent protein serine/threonine kinase activity	10/135	117/18903	1.15037e-08	3.06627e-07	2.54291e-07	CCNA2/CCNB1/CCNB2/CCND2/CDK5RAP2/CDKN3/CKS1B/CKS2/PLK1/PSRC1	10
BP	GO:0000022	mitotic spindle elongation	5/135	12/18903	1.3121e-08	3.45622e-07	2.8663e-07	AURKB/BIRC5/KIF23/KIF4A/PRC1	5
BP	GO:1904666	regulation of ubiquitin protein ligase activity	6/135	24/18903	1.4369e-08	3.74095e-07	3.10243e-07	CDC20/FBXO5/MAD2L1/PLK1/UBE2C/UBE2S	6
BP	GO:1904029	regulation of cyclin-dependent protein kinase activity	10/135	120/18903	1.4701e-08	3.7834e-07	3.13764e-07	CCNA2/CCNB1/CCNB2/CCND2/CDK5RAP2/CDKN3/CKS1B/CKS2/PLK1/PSRC1	10
BP	GO:1901989	positive regulation of cell cycle phase transition	10/135	122/18903	1.7247e-08	4.38819e-07	3.6392e-07	ATAD5/CCNB1/CCND2/CDK1/DLGAP5/EZH2/FBXO5/RRM1/RRM2/UBE2C	10
BP	GO:0044786	cell cycle DNA replication	7/135	42/18903	1.77486e-08	4.46506e-07	3.70295e-07	ATAD5/BRCA2/DBF4/FBXO5/GMNN/MCM4/PCNA	7
BP	GO:0007144	female meiosis I	5/135	13/18903	2.11994e-08	5.27395e-07	4.37378e-07	AURKA/CCNB2/FBXO5/NDC80/UBB	5
BP	GO:0032465	regulation of cytokinesis	9/135	95/18903	2.58266e-08	6.35448e-07	5.26988e-07	AURKA/AURKB/BIRC5/BRCA2/CALM2/KIF20B/KIF23/PLK1/PRC1	9
BP	GO:0051255	spindle midzone assembly	5/135	14/18903	3.2788e-08	7.97961e-07	6.61763e-07	AURKB/BIRC5/KIF23/KIF4A/PRC1	5
BP	GO:0000212	meiotic spindle organization	5/135	15/18903	4.89004e-08	1.17729e-06	9.76348e-07	ASPM/AURKA/CCNB2/FBXO5/NDC80	5
BP	GO:0051642	centrosome localization	6/135	32/18903	9.23122e-08	2.1988e-06	1.8235e-06	ASPM/AURKA/DLGAP5/EZR/MAD2L1/SYNE2	6
BP	GO:0061842	microtubule organizing center localization	6/135	33/18903	1.12167e-07	2.6436e-06	2.19239e-06	ASPM/AURKA/DLGAP5/EZR/MAD2L1/SYNE2	6
BP	GO:0051302	regulation of cell division	11/135	190/18903	1.19982e-07	2.79833e-06	2.3207e-06	ASPM/AURKA/AURKB/BIRC5/BRCA2/CALM2/KIF20B/KIF23/PLK1/PRC1/YBX1	11
BP	GO:0051438	regulation of ubiquitin-protein transferase activity	7/135	56/18903	1.40414e-07	3.24111e-06	2.68791e-06	BUB3/CDC20/FBXO5/MAD2L1/PLK1/UBE2C/UBE2S	7
BP	GO:0090329	regulation of DNA-templated DNA replication	7/135	57/18903	1.59126e-07	3.63554e-06	3.01502e-06	BRCA2/DBF4/FBXO5/GMNN/MCM4/PCNA/RFC3	7
BP	GO:0000281	mitotic cytokinesis	8/135	85/18903	1.66524e-07	3.76614e-06	3.12333e-06	AURKB/BIRC5/CKAP2/KIF20B/KIF23/KIF4A/NUSAP1/PLK1	8
BP	GO:1901978	positive regulation of cell cycle checkpoint	5/135	19/18903	1.8505e-07	4.14327e-06	3.43609e-06	AURKB/BIRC5/MAD2L1/NDC80/PBK	5
BP	GO:0000077	DNA damage checkpoint signaling	9/135	121/18903	2.12385e-07	4.70821e-06	3.9046e-06	BRCA1/BRCA2/CDK1/CLSPN/GTSE1/PBK/PLK1/RHNO1/RNASEH2B	9
BP	GO:0033260	nuclear DNA replication	6/135	38/18903	2.71517e-07	5.96007e-06	4.94279e-06	ATAD5/BRCA2/DBF4/GMNN/MCM4/PCNA	6
BP	GO:0007062	sister chromatid cohesion	7/135	63/18903	3.2136e-07	6.98567e-06	5.79334e-06	CDC20/ESCO2/KIF22/PLK1/RAD21/SMC1A/SMC3	7
BP	GO:0031570	DNA integrity checkpoint signaling	9/135	129/18903	3.67184e-07	7.82977e-06	6.49337e-06	BRCA1/BRCA2/CDK1/CLSPN/GTSE1/PBK/PLK1/RHNO1/RNASEH2B	9
BP	GO:0045931	positive regulation of mitotic cell cycle	9/135	129/18903	3.67184e-07	7.82977e-06	6.49337e-06	BRCA2/CCNB1/CCND2/CDK1/DLGAP5/FBXO5/RRM1/RRM2/UBE2C	9
BP	GO:1901992	positive regulation of mitotic cell cycle phase transition	8/135	100/18903	5.88701e-07	1.24349e-05	1.03125e-05	CCNB1/CCND2/CDK1/DLGAP5/FBXO5/RRM1/RRM2/UBE2C	8
BP	GO:0042770	signal transduction in response to DNA damage	10/135	181/18903	7.08026e-07	1.48156e-05	1.22868e-05	ATAD5/BRCA1/BRCA2/CDK1/CLSPN/GTSE1/PBK/PLK1/RHNO1/RNASEH2B	10
BP	GO:0006310	DNA recombination	13/135	332/18903	7.65522e-07	1.58704e-05	1.31616e-05	ATAD5/BRCA1/BRCA2/HMGB1/HMGB2/KPNA2/MCM4/NUCKS1/RAD21/RAD51AP1/RHNO1/RPA3/TOP2A	13
BP	GO:1904668	positive regulation of ubiquitin protein ligase activity	4/135	11/18903	7.89765e-07	1.62228e-05	1.34538e-05	CDC20/PLK1/UBE2C/UBE2S	4
BP	GO:0051984	positive regulation of chromosome segregation	5/135	25/18903	8.16909e-07	1.66278e-05	1.37897e-05	AURKB/BIRC5/CCNB1/SMC2/SMC4	5
BP	GO:0071900	regulation of protein serine/threonine kinase activity	14/135	395/18903	9.26906e-07	1.86968e-05	1.55056e-05	CALM2/CCNA2/CCNB1/CCNB2/CCND2/CDK5RAP2/CDKN3/CKS1B/CKS2/DBF4/EPHA4/EZH2/PLK1/PSRC1	14
BP	GO:0071478	cellular response to radiation	10/135	189/18903	1.05118e-06	2.10143e-05	1.74275e-05	AURKB/BRCA1/BRCA2/CCND2/HSPA5/NUCKS1/PBK/PCNA/RAD51AP1/RHNO1	10
BP	GO:0071479	cellular response to ionizing radiation	7/135	75/18903	1.07373e-06	2.1275e-05	1.76437e-05	BRCA1/BRCA2/CCND2/HSPA5/NUCKS1/RAD51AP1/RHNO1	7
BP	GO:0090232	positive regulation of spindle checkpoint	4/135	12/18903	1.17809e-06	2.29368e-05	1.90219e-05	AURKB/BIRC5/MAD2L1/NDC80	4
BP	GO:0090267	positive regulation of mitotic cell cycle spindle assembly checkpoint	4/135	12/18903	1.17809e-06	2.29368e-05	1.90219e-05	AURKB/BIRC5/MAD2L1/NDC80	4
BP	GO:1905820	positive regulation of chromosome separation	5/135	27/18903	1.22712e-06	2.36856e-05	1.96428e-05	AURKB/BIRC5/DLGAP5/SMC2/SMC4	5
BP	GO:0030261	chromosome condensation	6/135	49/18903	1.2896e-06	2.46787e-05	2.04665e-05	CDK1/NUSAP1/PLK1/SMC2/SMC4/TOP2A	6
BP	GO:0061640	cytoskeleton-dependent cytokinesis	8/135	113/18903	1.4979e-06	2.8422e-05	2.35709e-05	AURKB/BIRC5/CKAP2/KIF20B/KIF23/KIF4A/NUSAP1/PLK1	8
BP	GO:0007292	female gamete generation	9/135	159/18903	2.12679e-06	4.00158e-05	3.31858e-05	ASPM/AURKA/BRCA2/CCNB2/FBXO5/NDC80/PLK1/TOP2A/UBB	9
BP	GO:1902751	positive regulation of cell cycle G2/M phase transition	5/135	31/18903	2.52415e-06	4.70965e-05	3.90579e-05	ATAD5/CCNB1/CDK1/FBXO5/RRM1	5
BP	GO:0031396	regulation of protein ubiquitination	10/135	210/18903	2.72263e-06	5.038e-05	4.1781e-05	BRCA1/BUB3/CDC20/FBXO5/HSPA5/MAD2L1/PLK1/UBB/UBE2C/UBE2S	10
BP	GO:0034508	centromere complex assembly	5/135	32/18903	2.97449e-06	5.45893e-05	4.52718e-05	CENPC/CENPE/CENPF/DLGAP5/HELLS	5
BP	GO:0051653	spindle localization	6/135	59/18903	3.91928e-06	7.13437e-05	5.91666e-05	ASPM/CDK5RAP2/MAD2L1/NDC80/NUSAP1/PLK1	6
BP	GO:0009314	response to radiation	14/135	452/18903	4.46658e-06	8.06505e-05	6.68849e-05	AURKB/BRCA1/BRCA2/CCND2/HMGN1/HSPA5/NPY/NUCKS1/PBK/PCNA/RAD51AP1/RHNO1/SMC1A/USP1	14
BP	GO:0071824	protein-DNA complex subunit organization	11/135	277/18903	4.92905e-06	8.82892e-05	7.32197e-05	ANP32B/ANP32E/CENPC/CENPE/CENPF/CHAF1A/DLGAP5/GMNN/HELLS/HMGB1/HMGB2	11
BP	GO:0044843	cell cycle G1/S phase transition	11/135	280/18903	5.46145e-06	9.70491e-05	8.04846e-05	CCNA2/CCND2/CDK6/CDKN3/DBF4/EZH2/GTSE1/MN1/RRM1/RRM2/SOX2	11
BP	GO:0007098	centrosome cycle	8/135	135/18903	5.68553e-06	0.000100236	8.31271e-05	AURKA/BRCA1/BRCA2/CDK1/CDK5RAP2/KIF11/NDC80/PLK1	8
BP	GO:0010972	negative regulation of G2/M transition of mitotic cell cycle	6/135	64/18903	6.33383e-06	0.000110793	9.18822e-05	AURKB/BRCA1/CDK1/CLSPN/PLK1/RAD21	6
BP	GO:0034501	protein localization to kinetochore	4/135	18/18903	7.04421e-06	0.000119485	9.90909e-05	AURKB/BUB3/CDK1/NDC80	4
BP	GO:0051382	kinetochore assembly	4/135	18/18903	7.04421e-06	0.000119485	9.90909e-05	CENPC/CENPE/CENPF/DLGAP5	4
BP	GO:0051988	regulation of attachment of spindle microtubules to kinetochore	4/135	18/18903	7.04421e-06	0.000119485	9.90909e-05	AURKB/BIRC5/CCNB1/KNSTRN	4
BP	GO:1903083	protein localization to condensed chromosome	4/135	18/18903	7.04421e-06	0.000119485	9.90909e-05	AURKB/BUB3/CDK1/NDC80	4
BP	GO:0040001	establishment of mitotic spindle localization	5/135	38/18903	7.16362e-06	0.000120597	0.000100013	CDK5RAP2/MAD2L1/NDC80/NUSAP1/PLK1	5
BP	GO:1902750	negative regulation of cell cycle G2/M phase transition	6/135	66/18903	7.5866e-06	0.000126764	0.000105128	AURKB/BRCA1/CDK1/CLSPN/PLK1/RAD21	6
BP	GO:0007076	mitotic chromosome condensation	4/135	19/18903	8.87332e-06	0.000147166	0.000122047	NUSAP1/PLK1/SMC2/SMC4	4
BP	GO:0048144	fibroblast proliferation	7/135	103/18903	9.08137e-06	0.000149509	0.00012399	CCNA2/CCNB1/CDK1/CDK6/CKS1B/CKS2/RNASEH2B	7
BP	GO:0065004	protein-DNA complex assembly	10/135	242/18903	9.54809e-06	0.000156045	0.000129411	ANP32B/CENPC/CENPE/CENPF/CHAF1A/DLGAP5/GMNN/HELLS/HMGB1/HMGB2	10
BP	GO:0006302	double-strand break repair	11/135	300/18903	1.04788e-05	0.000170014	0.000140996	BRCA1/BRCA2/DEK/ESCO2/HMGB1/HMGB2/MCM4/NUCKS1/RAD21/RAD51AP1/RPA3	11
BP	GO:0051054	positive regulation of DNA metabolic process	11/135	301/18903	1.08108e-05	0.00017414	0.000144417	ATAD5/AURKB/BRCA1/CDK1/DBF4/HMGB1/HNRNPA1/PCNA/RAD51AP1/RFC3/USP1	11
BP	GO:0031023	microtubule organizing center organization	8/135	150/18903	1.23398e-05	0.000197349	0.000163665	AURKA/BRCA1/BRCA2/CDK1/CDK5RAP2/KIF11/NDC80/PLK1	8
BP	GO:0060236	regulation of mitotic spindle organization	5/135	43/18903	1.33504e-05	0.000211997	0.000175813	KIF15/PLK1/PSRC1/TACC3/TPX2	5
BP	GO:1903320	regulation of protein modification by small protein conjugation or removal	10/135	252/18903	1.35803e-05	0.000214129	0.000177581	BRCA1/BUB3/CDC20/FBXO5/HSPA5/MAD2L1/PLK1/UBB/UBE2C/UBE2S	10
BP	GO:2001020	regulation of response to DNA damage stimulus	11/135	312/18903	1.51134e-05	0.000236636	0.000196246	ATAD5/BRCA1/BRCA2/DEK/FBXO5/HMGB1/PBK/PCNA/RAD51AP1/RNASEH2B/USP1	11
BP	GO:0051444	negative regulation of ubiquitin-protein transferase activity	4/135	22/18903	1.647e-05	0.000256086	0.000212377	BUB3/CDC20/FBXO5/MAD2L1	4
BP	GO:0090224	regulation of spindle organization	5/135	47/18903	2.07931e-05	0.000321074	0.000266272	KIF15/PLK1/PSRC1/TACC3/TPX2	5
BP	GO:0031398	positive regulation of protein ubiquitination	7/135	119/18903	2.3358e-05	0.000358209	0.000297069	BRCA1/CDC20/HSPA5/PLK1/UBB/UBE2C/UBE2S	7
BP	GO:0044773	mitotic DNA damage checkpoint signaling	6/135	81/18903	2.48273e-05	0.000378152	0.000313608	BRCA1/CDK1/CLSPN/GTSE1/PBK/PLK1	6
BP	GO:0031145	anaphase-promoting complex-dependent catabolic process	4/135	25/18903	2.80125e-05	0.000423784	0.000351451	CDC20/PLK1/UBE2C/UBE2S	4
BP	GO:0045737	positive regulation of cyclin-dependent protein serine/threonine kinase activity	5/135	50/18903	2.82321e-05	0.000424239	0.000351829	CCNB1/CCND2/CKS1B/CKS2/PSRC1	5
BP	GO:0044774	mitotic DNA integrity checkpoint signaling	6/135	85/18903	3.26861e-05	0.000484962	0.000402188	BRCA1/CDK1/CLSPN/GTSE1/PBK/PLK1	6
BP	GO:0007064	mitotic sister chromatid cohesion	4/135	26/18903	3.29228e-05	0.000484962	0.000402188	CDC20/ESCO2/SMC1A/SMC3	4
BP	GO:2000001	regulation of DNA damage checkpoint	4/135	26/18903	3.29228e-05	0.000484962	0.000402188	BRCA1/BRCA2/PBK/RNASEH2B	4
BP	GO:0000725	recombinational repair	8/135	173/18903	3.45567e-05	0.000505703	0.000419388	BRCA1/BRCA2/MCM4/NUCKS1/RAD21/RAD51AP1/RHNO1/RPA3	8
BP	GO:0071902	positive regulation of protein serine/threonine kinase activity	9/135	229/18903	4.00238e-05	0.000581904	0.000482583	CALM2/CCNB1/CCND2/CKS1B/CKS2/DBF4/EPHA4/EZH2/PSRC1	9
BP	GO:0051293	establishment of spindle localization	5/135	54/18903	4.11874e-05	0.000583975	0.000484301	CDK5RAP2/MAD2L1/NDC80/NUSAP1/PLK1	5
BP	GO:0071168	protein localization to chromatin	5/135	54/18903	4.11874e-05	0.000583975	0.000484301	ESCO2/EZH2/PLK1/RAD21/VRK1	5
BP	GO:1904031	positive regulation of cyclin-dependent protein kinase activity	5/135	54/18903	4.11874e-05	0.000583975	0.000484301	CCNB1/CCND2/CKS1B/CKS2/PSRC1	5
BP	GO:1902412	regulation of mitotic cytokinesis	3/135	10/18903	4.12095e-05	0.000583975	0.000484301	AURKB/BIRC5/KIF20B	3
BP	GO:0010971	positive regulation of G2/M transition of mitotic cell cycle	4/135	28/18903	4.45934e-05	0.000627954	0.000520773	CCNB1/CDK1/FBXO5/RRM1	4
BP	GO:0045860	positive regulation of protein kinase activity	12/135	420/18903	4.87911e-05	0.000682771	0.000566234	CALM2/CCNB1/CCND2/CENPE/CKS1B/CKS2/CLSPN/DBF4/EPHA4/EZH2/PSRC1/TPX2	12
BP	GO:0051987	positive regulation of attachment of spindle microtubules to kinetochore	3/135	11/18903	5.63669e-05	0.000783885	0.000650089	AURKB/BIRC5/CCNB1	3
BP	GO:1903322	positive regulation of protein modification by small protein conjugation or removal	7/135	137/18903	5.76651e-05	0.000796988	0.000660957	BRCA1/CDC20/HSPA5/PLK1/UBB/UBE2C/UBE2S	7
BP	GO:0031099	regeneration	8/135	192/18903	7.22083e-05	0.000991867	0.000822573	AURKA/CCNA2/CDK1/DHFR/EPHA4/EZH2/PCNA/SOX2	8
BP	GO:0010212	response to ionizing radiation	7/135	143/18903	7.56359e-05	0.00103261	0.000856365	BRCA1/BRCA2/CCND2/HSPA5/NUCKS1/RAD51AP1/RHNO1	7
BP	GO:0051443	positive regulation of ubiquitin-protein transferase activity	4/135	32/18903	7.66045e-05	0.0010395	0.000862075	CDC20/PLK1/UBE2C/UBE2S	4
BP	GO:0032886	regulation of microtubule-based process	9/135	252/18903	8.37434e-05	0.00112953	0.000936737	AURKA/BRCA1/CDK5RAP2/CKAP2/KIF15/PLK1/PSRC1/TACC3/TPX2	9
BP	GO:0000132	establishment of mitotic spindle orientation	4/135	33/18903	8.66899e-05	0.00116227	0.000963888	CDK5RAP2/MAD2L1/NDC80/PLK1	4
BP	GO:0007095	mitotic G2 DNA damage checkpoint signaling	4/135	34/18903	9.77067e-05	0.00129755	0.00107608	BRCA1/CDK1/CLSPN/PLK1	4
BP	GO:0009411	response to UV	7/135	149/18903	9.79392e-05	0.00129755	0.00107608	AURKB/BRCA2/HMGN1/PBK/PCNA/RHNO1/USP1	7
BP	GO:0031100	animal organ regeneration	5/135	65/18903	0.000101025	0.00132278	0.001097	AURKA/CCNA2/CDK1/EZH2/PCNA	5
BP	GO:0035825	homologous recombination	5/135	65/18903	0.000101025	0.00132278	0.001097	BRCA1/NUCKS1/RAD21/RAD51AP1/TOP2A	5
BP	GO:2001252	positive regulation of chromosome organization	6/135	106/18903	0.000112814	0.00146855	0.0012179	AURKB/DNMT1/HNRNPA1/RAD21/SMC2/SMC4	6
BP	GO:0070507	regulation of microtubule cytoskeleton organization	7/135	155/18903	0.000125329	0.00162203	0.00134518	CDK5RAP2/CKAP2/KIF15/PLK1/PSRC1/TACC3/TPX2	7
BP	GO:0022616	DNA strand elongation	4/135	37/18903	0.000136858	0.00176106	0.00146048	MCM4/NUCKS1/PCNA/RFC3	4
BP	GO:0071214	cellular response to abiotic stimulus	10/135	335/18903	0.00014865	0.00189106	0.00156829	AURKB/BRCA1/BRCA2/CCND2/HSPA5/NUCKS1/PBK/PCNA/RAD51AP1/RHNO1	10
BP	GO:0104004	cellular response to environmental stimulus	10/135	335/18903	0.00014865	0.00189106	0.00156829	AURKB/BRCA1/BRCA2/CCND2/HSPA5/NUCKS1/PBK/PCNA/RAD51AP1/RHNO1	10
BP	GO:0006270	DNA replication initiation	4/135	38/18903	0.000152116	0.00189337	0.00157021	GMNN/MCM10/MCM4/PRIM1	4
BP	GO:0006298	mismatch repair	4/135	38/18903	0.000152116	0.00189337	0.00157021	HMGB1/PCNA/RNASEH2B/RPA3	4
BP	GO:0006271	DNA strand elongation involved in DNA replication	3/135	15/18903	0.000152214	0.00189337	0.00157021	MCM4/PCNA/RFC3	3
BP	GO:2000104	negative regulation of DNA-templated DNA replication	3/135	15/18903	0.000152214	0.00189337	0.00157021	BRCA2/FBXO5/GMNN	3
BP	GO:0000731	DNA synthesis involved in DNA repair	4/135	40/18903	0.000186265	0.00220561	0.00182915	PCNA/RFC3/RRM1/USP1	4
BP	GO:0045740	positive regulation of DNA replication	4/135	40/18903	0.000186265	0.00220561	0.00182915	ATAD5/CDK1/DBF4/PCNA	4
BP	GO:0051294	establishment of spindle orientation	4/135	40/18903	0.000186265	0.00220561	0.00182915	CDK5RAP2/MAD2L1/NDC80/PLK1	4
BP	GO:0009263	deoxyribonucleotide biosynthetic process	3/135	16/18903	0.000186363	0.00220561	0.00182915	DUT/RRM1/RRM2	3
BP	GO:0009265	2'-deoxyribonucleotide biosynthetic process	3/135	16/18903	0.000186363	0.00220561	0.00182915	DUT/RRM1/RRM2	3
BP	GO:0034085	establishment of sister chromatid cohesion	3/135	16/18903	0.000186363	0.00220561	0.00182915	RAD21/SMC1A/SMC3	3
BP	GO:0045144	meiotic sister chromatid segregation	3/135	16/18903	0.000186363	0.00220561	0.00182915	RAD21/SMC1A/SMC3	3
BP	GO:0046385	deoxyribose phosphate biosynthetic process	3/135	16/18903	0.000186363	0.00220561	0.00182915	DUT/RRM1/RRM2	3
BP	GO:0051177	meiotic sister chromatid cohesion	3/135	16/18903	0.000186363	0.00220561	0.00182915	RAD21/SMC1A/SMC3	3
BP	GO:2000573	positive regulation of DNA biosynthetic process	5/135	74/18903	0.000187167	0.00220561	0.00182915	AURKB/HNRNPA1/PCNA/RFC3/USP1	5
BP	GO:0007018	microtubule-based movement	11/135	415/18903	0.00019579	0.00229516	0.00190341	CENPE/DLGAP5/KIF11/KIF15/KIF20B/KIF22/KIF23/KIF4A/KIFC1/SYNE2/UBB	11
BP	GO:0070192	chromosome organization involved in meiotic cell cycle	5/135	76/18903	0.000212225	0.00247486	0.00205244	RAD21/SMC1A/SMC2/SMC3/SMC4	5
BP	GO:0000724	double-strand break repair via homologous recombination	7/135	169/18903	0.000213855	0.00248094	0.00205749	BRCA1/BRCA2/MCM4/NUCKS1/RAD21/RAD51AP1/RPA3	7
BP	GO:0007135	meiosis II	3/135	17/18903	0.000225117	0.00258481	0.00214363	RAD21/SMC1A/SMC3	3
BP	GO:0061983	meiosis II cell cycle process	3/135	17/18903	0.000225117	0.00258481	0.00214363	RAD21/SMC1A/SMC3	3
BP	GO:0033674	positive regulation of kinase activity	12/135	496/18903	0.000232482	0.00265575	0.00220246	CALM2/CCNB1/CCND2/CENPE/CKS1B/CKS2/CLSPN/DBF4/EPHA4/EZH2/PSRC1/TPX2	12
BP	GO:0071459	protein localization to chromosome, centromeric region	4/135	43/18903	0.000247395	0.00281176	0.00233184	AURKB/BUB3/CDK1/NDC80	4
BP	GO:1901970	positive regulation of mitotic sister chromatid separation	3/135	18/18903	0.000268732	0.00303884	0.00252016	AURKB/BIRC5/DLGAP5	3
BP	GO:0031507	heterochromatin formation	5/135	83/18903	0.000320493	0.0036021	0.00298729	DNMT1/EZH2/HELLS/HMGB1/LMNB1	5
BP	GO:0032467	positive regulation of cytokinesis	4/135	46/18903	0.00032176	0.0036021	0.00298729	AURKB/BIRC5/KIF20B/KIF23	4
BP	GO:0006338	chromatin remodeling	10/135	373/18903	0.000351327	0.00391354	0.00324557	ANP32B/ANP32E/CHAF1A/DEK/DNMT1/EZH2/HELLS/HMGB1/HMGB2/LMNB1	10
BP	GO:0031297	replication fork processing	4/135	48/18903	0.000379455	0.00420594	0.00348806	BRCA1/BRCA2/NUCKS1/PCNA	4
BP	GO:0000082	G1/S transition of mitotic cell cycle	8/135	250/18903	0.000437529	0.00482575	0.00400208	CCND2/CDK6/CDKN3/DBF4/EZH2/GTSE1/RRM1/RRM2	8
BP	GO:0044818	mitotic G2/M transition checkpoint	4/135	50/18903	0.000444189	0.00487519	0.00404308	BRCA1/CDK1/CLSPN/PLK1	4
BP	GO:0070828	heterochromatin organization	5/135	91/18903	0.000490497	0.00535718	0.0044428	DNMT1/EZH2/HELLS/HMGB1/LMNB1	5
BP	GO:0032069	regulation of nuclease activity	3/135	22/18903	0.000496676	0.00539834	0.00447694	HMGB1/HMGB2/PCNA	3
BP	GO:0045814	negative regulation of gene expression, epigenetic	5/135	93/18903	0.00054196	0.00583389	0.00483815	DNMT1/EZH2/HELLS/HMGB1/LMNB1	5
BP	GO:0051781	positive regulation of cell division	5/135	93/18903	0.00054196	0.00583389	0.00483815	AURKB/BIRC5/KIF20B/KIF23/YBX1	5
BP	GO:0048146	positive regulation of fibroblast proliferation	4/135	53/18903	0.000555526	0.00593476	0.0049218	CCNA2/CCNB1/CDK6/RNASEH2B	4
BP	GO:0071897	DNA biosynthetic process	7/135	198/18903	0.000556633	0.00593476	0.0049218	AURKB/CENPF/HNRNPA1/PCNA/RFC3/RRM1/USP1	7
BP	GO:0032392	DNA geometric change	5/135	99/18903	0.000720853	0.00764924	0.00634365	HMGB1/HMGB2/MCM4/RFC3/TOP2A	5
BP	GO:0045005	DNA-templated DNA replication maintenance of fidelity	4/135	57/18903	0.000733061	0.00774209	0.00642066	BRCA1/BRCA2/NUCKS1/PCNA	4
BP	GO:2000773	negative regulation of cellular senescence	3/135	26/18903	0.000821223	0.00863248	0.00715907	CDK6/FBXO5/YBX1	3
BP	GO:0051785	positive regulation of nuclear division	4/135	59/18903	0.000835382	0.00874028	0.00724847	AURKA/DLGAP5/NUSAP1/RAD51AP1	4
BP	GO:1902806	regulation of cell cycle G1/S phase transition	7/135	213/18903	0.000856286	0.00891733	0.0073953	CCND2/EZH2/GTSE1/MN1/RRM1/RRM2/SOX2	7
BP	GO:0051291	protein heterooligomerization	3/135	27/18903	0.000919072	0.00952686	0.00790079	COL1A2/RRM1/RRM2	3
BP	GO:0071103	DNA conformation change	5/135	106/18903	0.000981588	0.010128	0.00839933	HMGB1/HMGB2/MCM4/RFC3/TOP2A	5
BP	GO:0022412	cellular process involved in reproduction in multicellular organism	10/135	430/18903	0.00105155	0.0108001	0.00895675	ASPM/AURKA/BRCA2/CCNB2/FBXO5/HMGB2/NDC80/PLK1/TOP2A/UBB	10
BP	GO:0040029	epigenetic regulation of gene expression	6/135	163/18903	0.00112755	0.0115114	0.00954659	BRCA1/DNMT1/EZH2/HELLS/HMGB1/LMNB1	6
BP	GO:0051445	regulation of meiotic cell cycle	4/135	64/18903	0.00113461	0.0115114	0.00954659	ASPM/CDC20/FBXO5/RAD51AP1	4
BP	GO:0097421	liver regeneration	3/135	29/18903	0.00113623	0.0115114	0.00954659	AURKA/EZH2/PCNA	3
BP	GO:0042176	regulation of protein catabolic process	9/135	361/18903	0.00115902	0.0116894	0.00969422	AURKA/CDC20/EEF1A1/EZR/MAD2L1/PBK/PLK1/SUMO2/UBB	9
BP	GO:2001022	positive regulation of response to DNA damage stimulus	6/135	166/18903	0.00123839	0.0123871	0.0102728	BRCA1/HMGB1/PBK/PCNA/RAD51AP1/USP1	6
BP	GO:1903050	regulation of proteolysis involved in protein catabolic process	7/135	227/18903	0.00123926	0.0123871	0.0102728	AURKA/CDC20/EPHA4/PBK/PLK1/SUMO2/UBB	7
BP	GO:0001556	oocyte maturation	3/135	30/18903	0.00125592	0.0124978	0.0103646	AURKA/BRCA2/FBXO5	3
BP	GO:0021591	ventricular system development	3/135	31/18903	0.00138326	0.013704	0.011365	ANP32B/CDK6/CENPF	3
BP	GO:1902808	positive regulation of cell cycle G1/S phase transition	4/135	68/18903	0.00142267	0.0140071	0.0116163	CCND2/EZH2/RRM1/RRM2	4
BP	GO:0051098	regulation of binding	9/135	372/18903	0.00142636	0.0140071	0.0116163	AURKA/AURKB/CALM2/EPHA4/GMNN/HMGB1/HMGB2/NUCKS1/PLK1	9
BP	GO:2001234	negative regulation of apoptotic signaling pathway	7/135	233/18903	0.00143963	0.0140757	0.0116732	ATAD5/BRCA1/HELLS/HMGB2/MAZ/RTKN2/SLC25A6	7
BP	GO:0008156	negative regulation of DNA replication	3/135	32/18903	0.00151843	0.0146542	0.0121529	BRCA2/FBXO5/GMNN	3
BP	GO:0010165	response to X-ray	3/135	32/18903	0.00151843	0.0146542	0.0121529	BRCA2/CCND2/NUCKS1	3
BP	GO:0040020	regulation of meiotic nuclear division	3/135	32/18903	0.00151843	0.0146542	0.0121529	CDC20/FBXO5/RAD51AP1	3
BP	GO:0072331	signal transduction by p53 class mediator	6/135	173/18903	0.00152944	0.0146971	0.0121885	ATAD5/AURKA/AURKB/BRCA2/GTSE1/UBB	6
BP	GO:0021543	pallium development	6/135	174/18903	0.00157494	0.0150696	0.0124975	ASPM/CDK6/EZH2/NPY/SYNE2/TACC3	6
BP	GO:0030900	forebrain development	9/135	383/18903	0.00174136	0.016591	0.0137592	ASPM/CDK6/DNAJB1/EZH2/NPY/SOX2/SYNE2/TACC3/UBB	9
BP	GO:2000278	regulation of DNA biosynthetic process	5/135	121/18903	0.0017686	0.0167792	0.0139153	AURKB/HNRNPA1/PCNA/RFC3/USP1	5
BP	GO:0051298	centrosome duplication	4/135	74/18903	0.00194496	0.0183745	0.0152383	BRCA1/BRCA2/CDK5RAP2/NDC80	4
BP	GO:0031109	microtubule polymerization or depolymerization	5/135	124/18903	0.00196937	0.018403	0.0152619	CDK5RAP2/CKAP2/FBXO5/PSRC1/TPX2	5
BP	GO:0006301	postreplication repair	3/135	35/18903	0.00197263	0.018403	0.0152619	BRCA1/PCNA/USP1	3
BP	GO:0010390	histone monoubiquitination	3/135	35/18903	0.00197263	0.018403	0.0152619	BRCA1/BRCA2/UHRF1	3
BP	GO:0032200	telomere organization	6/135	185/18903	0.00214624	0.0199396	0.0165362	AURKB/BRCA2/EZH2/HNRNPA1/PCNA/RPA3	6
BP	GO:0009416	response to light stimulus	8/135	321/18903	0.0021768	0.0201359	0.0166991	AURKB/BRCA2/HMGN1/NPY/PBK/PCNA/RHNO1/USP1	8
BP	GO:0032070	regulation of deoxyribonuclease activity	2/135	10/18903	0.00219436	0.0201359	0.0166991	HMGB1/PCNA	2
BP	GO:0051660	establishment of centrosome localization	2/135	10/18903	0.00219436	0.0201359	0.0166991	EZR/MAD2L1	2
BP	GO:0045739	positive regulation of DNA repair	5/135	128/18903	0.00226237	0.0206753	0.0171464	BRCA1/HMGB1/PCNA/RAD51AP1/USP1	5
BP	GO:0006305	DNA alkylation	4/135	79/18903	0.0024711	0.0223999	0.0185767	BRCA1/DNMT1/EZH2/HELLS	4
BP	GO:0006306	DNA methylation	4/135	79/18903	0.0024711	0.0223999	0.0185767	BRCA1/DNMT1/EZH2/HELLS	4
BP	GO:0034975	protein folding in endoplasmic reticulum	2/135	11/18903	0.00266947	0.023718	0.0196697	HSP90B1/HSPA5	2
BP	GO:0044771	meiotic cell cycle phase transition	2/135	11/18903	0.00266947	0.023718	0.0196697	CCNB2/NDC80	2
BP	GO:0051081	nuclear membrane disassembly	2/135	11/18903	0.00266947	0.023718	0.0196697	PLK1/VRK1	2
BP	GO:0060623	regulation of chromosome condensation	2/135	11/18903	0.00266947	0.023718	0.0196697	SMC2/SMC4	2
BP	GO:0072697	protein localization to cell cortex	2/135	11/18903	0.00266947	0.023718	0.0196697	EZR/PLK1	2
BP	GO:0061136	regulation of proteasomal protein catabolic process	6/135	194/18903	0.00272003	0.0240718	0.0199631	AURKA/CDC20/PBK/PLK1/SUMO2/UBB	6
BP	GO:0006513	protein monoubiquitination	4/135	84/18903	0.00308768	0.0271111	0.0224837	BRCA1/BRCA2/UBB/UHRF1	4
BP	GO:0031397	negative regulation of protein ubiquitination	4/135	84/18903	0.00308768	0.0271111	0.0224837	BUB3/CDC20/FBXO5/MAD2L1	4
BP	GO:0010826	negative regulation of centrosome duplication	2/135	12/18903	0.00318841	0.0271439	0.0225109	BRCA1/CDK5RAP2	2
BP	GO:0010992	ubiquitin recycling	2/135	12/18903	0.00318841	0.0271439	0.0225109	UBE2C/UBE2S	2
BP	GO:0030397	membrane disassembly	2/135	12/18903	0.00318841	0.0271439	0.0225109	PLK1/VRK1	2
BP	GO:0046606	negative regulation of centrosome cycle	2/135	12/18903	0.00318841	0.0271439	0.0225109	BRCA1/CDK5RAP2	2
BP	GO:0051573	negative regulation of histone H3-K9 methylation	2/135	12/18903	0.00318841	0.0271439	0.0225109	BRCA1/DNMT1	2
BP	GO:0090435	protein localization to nuclear envelope	2/135	12/18903	0.00318841	0.0271439	0.0225109	LMNB1/PLK1	2
BP	GO:0140719	constitutive heterochromatin formation	2/135	12/18903	0.00318841	0.0271439	0.0225109	EZH2/HELLS	2
BP	GO:1904667	negative regulation of ubiquitin protein ligase activity	2/135	12/18903	0.00318841	0.0271439	0.0225109	FBXO5/MAD2L1	2
BP	GO:0046785	microtubule polymerization	4/135	85/18903	0.00322248	0.0272994	0.0226398	CDK5RAP2/FBXO5/PSRC1/TPX2	4
BP	GO:0006997	nucleus organization	5/135	139/18903	0.00323106	0.0272994	0.0226398	CDK1/HMGB2/LMNB1/PLK1/VRK1	5
BP	GO:0032434	regulation of proteasomal ubiquitin-dependent protein catabolic process	5/135	141/18903	0.00343492	0.0289127	0.0239778	AURKA/CDC20/PBK/PLK1/SUMO2	5
BP	GO:0031110	regulation of microtubule polymerization or depolymerization	4/135	87/18903	0.00350402	0.0292742	0.0242776	CDK5RAP2/CKAP2/PSRC1/TPX2	4
BP	GO:0048145	regulation of fibroblast proliferation	4/135	87/18903	0.00350402	0.0292742	0.0242776	CCNA2/CCNB1/CDK6/RNASEH2B	4
BP	GO:1902115	regulation of organelle assembly	6/135	207/18903	0.00374285	0.0307599	0.0255097	BRCA1/CDK5RAP2/EZR/KIF15/PLK1/SYNE2	6
BP	GO:0071481	cellular response to X-ray	2/135	13/18903	0.00375054	0.0307599	0.0255097	CCND2/NUCKS1	2
BP	GO:0090235	regulation of metaphase plate congression	2/135	13/18903	0.00375054	0.0307599	0.0255097	AURKB/BIRC5	2
BP	GO:1900262	regulation of DNA-directed DNA polymerase activity	2/135	13/18903	0.00375054	0.0307599	0.0255097	PCNA/RFC3	2
BP	GO:1900264	positive regulation of DNA-directed DNA polymerase activity	2/135	13/18903	0.00375054	0.0307599	0.0255097	PCNA/RFC3	2
BP	GO:0034644	cellular response to UV	4/135	89/18903	0.00380183	0.0309034	0.0256288	AURKB/PBK/PCNA/RHNO1	4
BP	GO:0009394	2'-deoxyribonucleotide metabolic process	3/135	44/18903	0.00380945	0.0309034	0.0256288	DUT/RRM1/RRM2	3
BP	GO:0045840	positive regulation of mitotic nuclear division	3/135	44/18903	0.00380945	0.0309034	0.0256288	AURKA/DLGAP5/NUSAP1	3
BP	GO:0030705	cytoskeleton-dependent intracellular transport	6/135	208/18903	0.00383189	0.0309733	0.0256867	KIF4A/SYNE2/TUBA1B/TUBA1C/TUBB/UBB	6
BP	GO:0009262	deoxyribonucleotide metabolic process	3/135	45/18903	0.00406045	0.0324691	0.0269272	DUT/RRM1/RRM2	3
BP	GO:0019692	deoxyribose phosphate metabolic process	3/135	45/18903	0.00406045	0.0324691	0.0269272	DUT/RRM1/RRM2	3
BP	GO:0032781	positive regulation of ATP-dependent activity	3/135	45/18903	0.00406045	0.0324691	0.0269272	DNAJB1/PFN2/UHRF1	3
BP	GO:0051258	protein polymerization	7/135	281/18903	0.00409787	0.0326517	0.0270787	CDK5RAP2/FBXO5/PFN2/PSRC1/TPX2/UBE2C/UBE2S	7
BP	GO:0006282	regulation of DNA repair	6/135	212/18903	0.00420389	0.0333777	0.0276807	BRCA1/DEK/HMGB1/PCNA/RAD51AP1/USP1	6
BP	GO:0007100	mitotic centrosome separation	2/135	14/18903	0.00435523	0.0342153	0.0283753	AURKA/KIF11	2
BP	GO:0071236	cellular response to antibiotic	2/135	14/18903	0.00435523	0.0342153	0.0283753	EZH2/HSPA5	2
BP	GO:1902969	mitotic DNA replication	2/135	14/18903	0.00435523	0.0342153	0.0283753	BRCA2/MCM4	2
BP	GO:0030010	establishment of cell polarity	5/135	150/18903	0.00446809	0.0349792	0.0290089	CDK5RAP2/KIF20B/MAD2L1/NDC80/PLK1	5
BP	GO:0032436	positive regulation of proteasomal ubiquitin-dependent protein catabolic process	4/135	94/18903	0.00462041	0.0360456	0.0298933	AURKA/CDC20/PLK1/SUMO2	4
BP	GO:1903321	negative regulation of protein modification by small protein conjugation or removal	4/135	96/18903	0.00497858	0.0379631	0.0314835	BUB3/CDC20/FBXO5/MAD2L1	4
BP	GO:0000723	telomere maintenance	5/135	154/18903	0.00499172	0.0379631	0.0314835	AURKB/BRCA2/HNRNPA1/PCNA/RPA3	5
BP	GO:0010225	response to UV-C	2/135	15/18903	0.00500184	0.0379631	0.0314835	BRCA2/HMGN1	2
BP	GO:0030174	regulation of DNA-templated DNA replication initiation	2/135	15/18903	0.00500184	0.0379631	0.0314835	GMNN/MCM4	2
BP	GO:0048308	organelle inheritance	2/135	15/18903	0.00500184	0.0379631	0.0314835	CDK1/VRK1	2
BP	GO:0048313	Golgi inheritance	2/135	15/18903	0.00500184	0.0379631	0.0314835	CDK1/VRK1	2
BP	GO:0051290	protein heterotetramerization	2/135	15/18903	0.00500184	0.0379631	0.0314835	RRM1/RRM2	2
BP	GO:0051299	centrosome separation	2/135	15/18903	0.00500184	0.0379631	0.0314835	AURKA/KIF11	2
BP	GO:0043161	proteasome-mediated ubiquitin-dependent protein catabolic process	9/135	450/18903	0.00505921	0.0382689	0.031737	AURKA/CDC20/HSP90B1/HSPA5/PBK/PLK1/SUMO2/UBE2C/UBE2S	9
BP	GO:2001233	regulation of apoptotic signaling pathway	8/135	374/18903	0.00547469	0.0412721	0.0342277	ATAD5/BRCA1/HELLS/HMGB2/MAZ/RTKN2/SLC25A6/UBB	8
BP	GO:0006266	DNA ligation	2/135	16/18903	0.00568977	0.0427496	0.035453	HMGB1/TOP2A	2
BP	GO:0016574	histone ubiquitination	3/135	52/18903	0.00609885	0.04567	0.0378749	BRCA1/BRCA2/UHRF1	3
BP	GO:0048477	oogenesis	4/135	103/18903	0.00637797	0.0476009	0.0394763	ASPM/AURKA/BRCA2/FBXO5	4
BP	GO:1900037	regulation of cellular response to hypoxia	2/135	17/18903	0.00641839	0.0477434	0.0395945	CHCHD2/EPHA4	2
BP	GO:0051494	negative regulation of cytoskeleton organization	5/135	165/18903	0.0066543	0.0493343	0.0409138	BRCA1/CDK5RAP2/CKAP2/PFN2/TPX2	5
CC	GO:0005819	spindle	36/139	426/19869	6.73456e-29	1.91261e-26	1.52414e-26	ASPM/AURKA/AURKB/BIRC5/CALM2/CCNB1/CDC20/CDK1/CDK5RAP2/CENPE/CENPF/CKAP2/CKAP2L/DLGAP5/FBXO5/HMMR/KIF11/KIF15/KIF20B/KIF22/KIF23/KIF4A/KIFC1/KNSTRN/MAD2L1/NUSAP1/PLK1/PRC1/PSRC1/RAD21/SMC1A/SMC3/TACC3/TPX2/TUBB/TUBB4B	36
CC	GO:0098687	chromosomal region	32/139	388/19869	2.49989e-25	3.54984e-23	2.82882e-23	AURKB/BIRC5/BRCA2/BUB3/CCNB1/CDK1/CENPC/CENPE/CENPF/CENPM/CENPU/DNMT1/ESCO2/EZH2/HELLS/KIF22/KNSTRN/MAD2L1/MCM4/MIS18BP1/NDC80/NUF2/PCNA/PLK1/RAD21/RAD51AP1/SMC1A/SMC3/SMC4/SPC25/TOP2A/ZWINT	32
CC	GO:0000793	condensed chromosome	28/139	273/19869	8.36778e-25	7.9215e-23	6.31254e-23	AURKB/BIRC5/BRCA1/BRCA2/BUB3/CCNB1/CENPC/CENPE/CENPF/CENPM/CENPU/HMGB1/HMGB2/KIF22/KNSTRN/MAD2L1/MKI67/NDC80/NUF2/PLK1/RAD21/SMC1A/SMC2/SMC3/SMC4/SPC25/TOP2A/ZWINT	28
CC	GO:0000775	chromosome, centromeric region	27/139	250/19869	1.54275e-24	1.09536e-22	8.72874e-23	AURKB/BIRC5/BUB3/CCNB1/CENPC/CENPE/CENPF/CENPM/CENPU/DNMT1/ESCO2/EZH2/HELLS/KIF22/KNSTRN/MAD2L1/MIS18BP1/NDC80/NUF2/PLK1/RAD21/SMC1A/SMC3/SMC4/SPC25/TOP2A/ZWINT	27
CC	GO:0072686	mitotic spindle	24/139	183/19869	6.32936e-24	3.59508e-22	2.86487e-22	ASPM/AURKA/AURKB/CDK1/CDK5RAP2/CENPE/CKAP2/CKAP2L/KIF11/KIF20B/KIF22/KIF23/KIFC1/KNSTRN/MAD2L1/NUSAP1/PLK1/PRC1/SMC1A/SMC3/TACC3/TPX2/TUBB/TUBB4B	24
CC	GO:0000922	spindle pole	23/139	172/19869	3.72693e-23	1.76408e-21	1.40577e-21	ASPM/AURKA/AURKB/CALM2/CCNB1/CDC20/CDK5RAP2/CENPF/CKAP2/CKAP2L/DLGAP5/KIF11/KIF20B/KNSTRN/MAD2L1/PLK1/PRC1/PSRC1/RAD21/SMC1A/SMC3/TACC3/TPX2	23
CC	GO:0005874	microtubule	27/139	466/19869	1.86333e-17	7.55978e-16	6.02429e-16	ASPM/AURKA/AURKB/BIRC5/CALM2/CDK1/CDK5RAP2/CENPE/CKAP2/GTSE1/KIF11/KIF15/KIF20B/KIF22/KIF23/KIF4A/KIFC1/KNSTRN/NUSAP1/PLK1/PRC1/PSRC1/TPX2/TUBA1B/TUBA1C/TUBB/TUBB4B	27
CC	GO:0000776	kinetochore	18/139	164/19869	9.62462e-17	3.41674e-15	2.72275e-15	AURKB/BIRC5/BUB3/CCNB1/CENPC/CENPE/CENPF/CENPM/CENPU/KIF22/KNSTRN/MAD2L1/NDC80/NUF2/PLK1/SMC1A/SPC25/ZWINT	18
CC	GO:0000779	condensed chromosome, centromeric region	18/139	174/19869	2.79153e-16	8.80882e-15	7.01963e-15	AURKB/BIRC5/BUB3/CCNB1/CENPC/CENPE/CENPF/CENPM/CENPU/KIF22/KNSTRN/MAD2L1/NDC80/NUF2/PLK1/SMC1A/SPC25/ZWINT	18
CC	GO:0030496	midbody	17/139	203/19869	6.73191e-14	1.91186e-12	1.52354e-12	ASPM/AURKA/AURKB/BIRC5/CDK1/CENPC/CENPE/CENPF/HSP90B1/HSPA5/KIF20B/KIF23/KIF4A/PLK1/PRC1/PSRC1/RAD21	17
CC	GO:0000228	nuclear chromosome	16/139	249/19869	2.19561e-11	5.54416e-10	4.41806e-10	ANP32E/BIRC5/BRCA1/BRCA2/MCM10/MCM4/PCNA/PLK1/PRIM1/RAD21/RPA3/SMC1A/SMC2/SMC3/SMC4/TOP2A	16
CC	GO:0005876	spindle microtubule	11/139	87/19869	2.3426e-11	5.54416e-10	4.41806e-10	AURKA/AURKB/BIRC5/CALM2/CDK1/CENPE/KIF11/KIF4A/PLK1/PRC1/PSRC1	11
CC	GO:0000307	cyclin-dependent protein kinase holoenzyme complex	9/139	50/19869	6.0701e-11	1.32608e-09	1.05674e-09	CCNA2/CCNB1/CCNB2/CCND2/CDK1/CDK6/CKS1B/CKS2/PCNA	9
CC	GO:0097431	mitotic spindle pole	8/139	38/19869	1.91859e-10	3.89199e-09	3.10148e-09	ASPM/AURKA/AURKB/CDK5RAP2/KIF20B/PLK1/SMC1A/SMC3	8
CC	GO:1902554	serine/threonine protein kinase complex	10/139	122/19869	1.43472e-08	2.71641e-07	2.16467e-07	CCNA2/CCNB1/CCNB2/CCND2/CDK1/CDK6/CKS1B/CKS2/DBF4/PCNA	10
CC	GO:1902911	protein kinase complex	10/139	136/19869	4.07309e-08	7.22974e-07	5.76129e-07	CCNA2/CCNB1/CCNB2/CCND2/CDK1/CDK6/CKS1B/CKS2/DBF4/PCNA	10
CC	GO:0000794	condensed nuclear chromosome	8/139	79/19869	8.04549e-08	1.34407e-06	1.07107e-06	BRCA1/BRCA2/PLK1/RAD21/SMC1A/SMC2/SMC3/SMC4	8
CC	GO:0051233	spindle midzone	6/139	36/19869	1.72385e-07	2.71985e-06	2.16741e-06	AURKA/AURKB/CENPE/KIF20B/PLK1/PRC1	6
CC	GO:0005875	microtubule associated complex	10/139	166/19869	2.66472e-07	3.98305e-06	3.17404e-06	AURKA/AURKB/BIRC5/KIF11/KIF15/KIF20B/KIF22/KIF23/KIF4A/KIFC1	10
CC	GO:0005657	replication fork	7/139	65/19869	3.49707e-07	4.96584e-06	3.95721e-06	DNMT1/MCM10/PCNA/PRIM1/RFC3/RPA3/UHRF1	7
CC	GO:0031617	NMS complex	4/139	10/19869	4.66231e-07	6.30522e-06	5.02454e-06	NDC80/NUF2/SPC25/ZWINT	4
CC	GO:0034399	nuclear periphery	9/139	145/19869	8.38415e-07	1.08232e-05	8.62484e-06	CENPF/KIF4A/LMNB1/MATR3/PCNA/RAD21/SMC1A/SMC3/UHRF1	9
CC	GO:0000940	outer kinetochore	4/139	12/19869	1.08707e-06	1.3423e-05	1.06966e-05	CCNB1/CENPF/NDC80/PLK1	4
CC	GO:0005871	kinesin complex	6/139	49/19869	1.14863e-06	1.35921e-05	1.08313e-05	KIF11/KIF15/KIF20B/KIF22/KIF23/KIFC1	6
CC	GO:0005721	pericentric heterochromatin	5/139	28/19869	1.34603e-06	1.52909e-05	1.21851e-05	CENPC/DNMT1/ESCO2/EZH2/HELLS	5
CC	GO:0045120	pronucleus	4/139	14/19869	2.1745e-06	2.28725e-05	1.82268e-05	AURKA/CCNA2/CENPF/EZH2	4
CC	GO:1990023	mitotic spindle midzone	4/139	14/19869	2.1745e-06	2.28725e-05	1.82268e-05	AURKB/CENPE/KIF20B/PRC1	4
CC	GO:0016363	nuclear matrix	8/139	126/19869	2.94036e-06	2.98237e-05	2.37661e-05	CENPF/KIF4A/LMNB1/MATR3/RAD21/SMC1A/SMC3/UHRF1	8
CC	GO:0044815	DNA packaging complex	9/139	178/19869	4.58377e-06	4.48893e-05	3.57717e-05	NDC80/NUF2/RAD21/SMC1A/SMC2/SMC3/SMC4/SPC25/ZWINT	9
CC	GO:0043073	germ cell nucleus	6/139	66/19869	6.77015e-06	6.40908e-05	5.10731e-05	AURKA/BRCA1/DNMT1/HMGN1/PCNA/TOP2A	6
CC	GO:0061695	transferase complex, transferring phosphorus-containing groups	11/139	295/19869	7.44734e-06	6.82272e-05	5.43694e-05	CCNA2/CCNB1/CCNB2/CCND2/CDK1/CDK6/CKS1B/CKS2/DBF4/PCNA/PRIM1	11
CC	GO:0000152	nuclear ubiquitin ligase complex	5/139	45/19869	1.52094e-05	0.000134983	0.000107566	BRCA1/BRCA2/CDC20/UBE2C/UBE2S	5
CC	GO:0000792	heterochromatin	6/139	78/19869	1.78681e-05	0.000153774	0.00012254	CENPC/DNMT1/ESCO2/EZH2/HELLS/UHRF1	6
CC	GO:0045171	intercellular bridge	6/139	89/19869	3.79602e-05	0.000317079	0.000252676	CENPE/KIF20B/PRC1/TPX2/TUBB/TUBB4B	6
CC	GO:0043596	nuclear replication fork	4/139	33/19869	8.01749e-05	0.000650562	0.000518424	MCM10/PCNA/PRIM1/RPA3	4
CC	GO:0000800	lateral element	3/139	13/19869	9.10318e-05	0.000718139	0.000572276	BRCA1/BRCA2/SMC3	3
CC	GO:0008278	cohesin complex	3/139	14/19869	0.000115266	0.00083937	0.000668882	RAD21/SMC1A/SMC3	3
CC	GO:0031616	spindle pole centrosome	3/139	14/19869	0.000115266	0.00083937	0.000668882	AURKA/AURKB/DLGAP5	3
CC	GO:0072687	meiotic spindle	3/139	14/19869	0.000115266	0.00083937	0.000668882	ASPM/AURKA/FBXO5	3
CC	GO:0030894	replisome	3/139	15/19869	0.000143345	0.00101775	0.000811029	PCNA/PRIM1/RPA3	3
CC	GO:0000795	synaptonemal complex	4/139	40/19869	0.000172397	0.00115926	0.000923798	BRCA1/BRCA2/PLK1/SMC3	4
CC	GO:0099086	synaptonemal structure	4/139	40/19869	0.000172397	0.00115926	0.000923798	BRCA1/BRCA2/PLK1/SMC3	4
CC	GO:0001674	female germ cell nucleus	3/139	16/19869	0.000175522	0.00115926	0.000923798	AURKA/DNMT1/HMGN1	3
CC	GO:0005680	anaphase-promoting complex	3/139	21/19869	0.00040632	0.00262261	0.00208992	CDC20/UBE2C/UBE2S	3
CC	GO:0034451	centriolar satellite	5/139	108/19869	0.000975953	0.00615935	0.0049083	CENPU/DLGAP5/KNSTRN/PLK1/TACC3	5
CC	GO:0000781	chromosome, telomeric region	6/139	168/19869	0.00118849	0.00733765	0.00584728	BRCA2/CDK1/EZH2/MCM4/PCNA/RAD51AP1	6
CC	GO:1990752	microtubule end	3/139	33/19869	0.00156769	0.00947283	0.00754877	ASPM/CDK5RAP2/KNSTRN	3
CC	GO:0070938	contractile ring	2/139	10/19869	0.00210764	0.0124702	0.00993736	KIF20B/PRC1	2
CC	GO:0005652	nuclear lamina	2/139	11/19869	0.00256422	0.0145648	0.0116065	LMNB1/PCNA	2
CC	GO:0034663	endoplasmic reticulum chaperone complex	2/139	11/19869	0.00256422	0.0145648	0.0116065	HSP90B1/HSPA5	2
CC	GO:0043601	nuclear replisome	2/139	13/19869	0.00360334	0.0200657	0.0159901	PRIM1/RPA3	2
CC	GO:0001741	XY body	2/139	14/19869	0.00418469	0.0224236	0.0178691	BRCA1/ESCO2	2
CC	GO:0010369	chromocenter	2/139	14/19869	0.00418469	0.0224236	0.0178691	AURKB/ESCO2	2
CC	GO:0001673	male germ cell nucleus	3/139	51/19869	0.00546028	0.028717	0.0228842	BRCA1/PCNA/TOP2A	3
CC	GO:0000151	ubiquitin ligase complex	7/139	309/19869	0.00612745	0.0316399	0.0252134	BRCA1/BRCA2/CDC20/CKS1B/CKS2/UBE2C/UBE2S	7
CC	GO:0031461	cullin-RING ubiquitin ligase complex	5/139	178/19869	0.0083633	0.0424139	0.0337991	CDC20/CKS1B/CKS2/UBE2C/UBE2S	5
MF	GO:0015631	tubulin binding	23/133	375/18432	2.99271e-15	9.54676e-13	7.97007e-13	BIRC5/BRCA1/BRCA2/CDK5RAP2/CENPE/CENPF/DLGAP5/EZR/GTSE1/KIF11/KIF15/KIF20B/KIF22/KIF23/KIF4A/KIFC1/KNSTRN/NUSAP1/PLK1/PRC1/PSRC1/SMC3/TPX2	23
MF	GO:0008017	microtubule binding	20/133	271/18432	6.85501e-15	1.09337e-12	9.12799e-13	BIRC5/CDK5RAP2/CENPE/CENPF/DLGAP5/EZR/GTSE1/KIF11/KIF15/KIF20B/KIF22/KIF23/KIF4A/KIFC1/KNSTRN/NUSAP1/PLK1/PRC1/PSRC1/TPX2	20
MF	GO:0003697	single-stranded DNA binding	12/133	124/18432	9.65864e-11	1.02704e-08	8.57416e-09	BRCA2/HMGB1/HMGB2/HNRNPA1/MCM10/MCM4/NUCKS1/RAD51AP1/RPA3/SMC2/SMC4/YBX1	12
MF	GO:0003777	microtubule motor activity	9/133	67/18432	1.21128e-09	9.65993e-08	8.06455e-08	CENPE/KIF11/KIF15/KIF20B/KIF22/KIF23/KIF4A/KIFC1/SMC3	9
MF	GO:0016887	ATP hydrolysis activity	16/133	347/18432	4.29747e-09	2.74178e-07	2.28897e-07	ATAD2/ATAD5/DDX39A/HSP90B1/HSPA5/KIF15/KIF20B/KIF22/KIF23/KIFC1/MCM4/PFN2/SMC1A/SMC2/SMC3/SMC4	16
MF	GO:0003774	cytoskeletal motor activity	9/133	111/18432	1.09601e-07	5.82711e-06	4.86474e-06	CENPE/KIF11/KIF15/KIF20B/KIF22/KIF23/KIF4A/KIFC1/SMC3	9
MF	GO:0016538	cyclin-dependent protein serine/threonine kinase regulator activity	6/133	50/18432	1.54336e-06	7.03331e-05	5.87173e-05	CCNA2/CCNB1/CCNB2/CCND2/CKS1B/CKS2	6
MF	GO:0035173	histone kinase activity	4/133	20/18432	1.14767e-05	0.000457635	0.000382054	AURKA/AURKB/CDK1/VRK1	4
MF	GO:0019887	protein kinase regulator activity	9/133	218/18432	2.94021e-05	0.00104214	0.000870028	CALM2/CCNA2/CCNB1/CCNB2/CCND2/CKS1B/CKS2/DBF4/TPX2	9
MF	GO:0043539	protein serine/threonine kinase activator activity	5/133	54/18432	4.31977e-05	0.00137801	0.00115042	CALM2/CCNB1/CKS1B/CKS2/DBF4	5
MF	GO:0008022	protein C-terminus binding	8/133	181/18432	5.10809e-05	0.00148135	0.00123669	BRCA2/CDC20/CENPF/EZR/MAD2L1/MKI67/PCNA/TOP2A	8
MF	GO:0019207	kinase regulator activity	9/133	246/18432	7.5077e-05	0.0019958	0.00166618	CALM2/CCNA2/CCNB1/CCNB2/CCND2/CKS1B/CKS2/DBF4/TPX2	9
MF	GO:0061575	cyclin-dependent protein serine/threonine kinase activator activity	3/133	13/18432	9.96348e-05	0.00244488	0.0020411	CCNB1/CKS1B/CKS2	3
MF	GO:0000217	DNA secondary structure binding	4/133	36/18432	0.000127594	0.00290733	0.00242717	CLSPN/HMGB1/HMGB2/RAD51AP1	4
MF	GO:0035198	miRNA binding	4/133	37/18432	0.000142264	0.00302548	0.00252581	HNRNPA1/MATR3/SOX2/YBX1	4
MF	GO:0003684	damaged DNA binding	5/133	71/18432	0.000161245	0.00321481	0.00268387	BRCA1/HMGB1/HMGB2/PCNA/RPA3	5
MF	GO:0030295	protein kinase activator activity	6/133	115/18432	0.00018638	0.00349736	0.00291976	CALM2/CCNB1/CKS1B/CKS2/DBF4/TPX2	6
MF	GO:0008574	plus-end-directed microtubule motor activity	3/133	17/18432	0.000231938	0.00392006	0.00327264	CENPE/KIF11/KIF20B	3
MF	GO:0008094	ATP-dependent activity, acting on DNA	6/133	121/18432	0.000245772	0.00392006	0.00327264	ATAD5/HELLS/MCM4/RFC3/SMC3/TOP2A	6
MF	GO:0019209	kinase activator activity	6/133	121/18432	0.000245772	0.00392006	0.00327264	CALM2/CCNB1/CKS1B/CKS2/DBF4/TPX2	6
MF	GO:0008301	DNA binding, bending	3/133	19/18432	0.00032704	0.00496789	0.00414742	HMGB1/HMGB2/TOP2A	3
MF	GO:0140097	catalytic activity, acting on DNA	8/133	241/18432	0.000366155	0.00530925	0.00443241	ATAD5/DNMT1/HELLS/MCM4/PCNA/RFC3/SMC3/TOP2A	8
MF	GO:0061980	regulatory RNA binding	4/133	51/18432	0.000497899	0.00673579	0.00562334	HNRNPA1/MATR3/SOX2/YBX1	4
MF	GO:0044389	ubiquitin-like protein ligase binding	9/133	318/18432	0.000506768	0.00673579	0.00562334	AURKA/BRCA1/CCNB1/HSPA5/SUMO2/TUBA1B/TUBB/UBB/UBE2C	9
MF	GO:0140678	molecular function inhibitor activity	5/133	93/18432	0.00056718	0.00705435	0.00588929	BRCA1/CALM2/DNAJB1/FBXO5/GMNN	5
MF	GO:0042393	histone binding	8/133	258/18432	0.000574962	0.00705435	0.00588929	ANP32B/ANP32E/ATAD2/CKS1B/CKS2/DEK/UHRF1/VRK1	8
MF	GO:0140677	molecular function activator activity	4/133	59/18432	0.000867342	0.0102475	0.00855507	AURKA/BRCA1/DNAJB1/PTTG1	4
MF	GO:0005200	structural constituent of cytoskeleton	5/133	107/18432	0.0010707	0.0121983	0.0101837	LMNB1/TUBA1B/TUBA1C/TUBB/TUBB4B	5
MF	GO:0044183	protein folding chaperone	4/133	68/18432	0.00147638	0.0162401	0.013558	ANP32E/DNAJB1/HSP90B1/HSPA5	4
MF	GO:0030332	cyclin binding	3/133	34/18432	0.00186623	0.0198442	0.0165669	CDK1/CDK6/NDC80	3
MF	GO:0097718	disordered domain specific binding	3/133	35/18432	0.00203049	0.0205106	0.0171232	CALM2/EZR/RRM1	3
MF	GO:0051082	unfolded protein binding	5/133	124/18432	0.00205749	0.0205106	0.0171232	CHAF1A/DNAJB1/HSP90B1/HSPA5/TUBB4B	5
MF	GO:0050786	RAGE receptor binding	2/133	10/18432	0.00223896	0.0216433	0.0180688	HMGB1/HMGB2	2
MF	GO:0016725	oxidoreductase activity, acting on CH or CH2 groups	2/133	11/18432	0.0027236	0.0255537	0.0213334	RRM1/RRM2	2
MF	GO:0008353	RNA polymerase II CTD heptapeptide repeat kinase activity	2/133	13/18432	0.00382623	0.0339046	0.0283051	CDK1/CDK6	2
MF	GO:0031386	protein tag	2/133	13/18432	0.00382623	0.0339046	0.0283051	SUMO2/UBB	2
MF	GO:0004712	protein serine/threonine/tyrosine kinase activity	3/133	45/18432	0.0041774	0.036016	0.0300678	AURKA/AURKB/PBK	3
MF	GO:0043130	ubiquitin binding	4/133	96/18432	0.00515877	0.0433065	0.0361543	BUB3/CKS1B/CKS2/TOP2A	4
MF	GO:0031625	ubiquitin protein ligase binding	7/133	299/18432	0.00603726	0.0493817	0.0412261	AURKA/BRCA1/HSPA5/SUMO2/TUBA1B/TUBB/UBB	7
		Abbreviation
		BP, biological process
		CC, cell component
		MF, molecular function
		CTX, cortex
		GE, ganglionic eminences
