# Supplementary material for: Cortical arealization of interneurons defines shared and distinct molecular programs in developing human and macaque brains
Source: Research Square preprint supplement (doi:10.21203/rs.3.rs-3939272/v1), 2024-02-26
Supplement: Supplementary file 9 [file bef3022a4ea37a3d2f99a404.xlsx]

## Sheet: Supplementary Data 3
Table S3. DEGs for different species between cortex and ganglionic eminences.
p_val	avg_log2FC	pct.1	pct.2	cluster	gene	species	p_val_adj	freq
2.58641e-30	3.68624	0.37	0.2	CTX	NRXN3	Human	3.32399e-21	100
5.65026e-56	2.46453	0.427	0.163	CTX	AUTS2	Human	9.4791e-45	100
5.19453e-59	2.24548	0.436	0.159	CTX	EEF1G	Human	2.97013e-45	100
2.9999e-42	2.06547	0.386	0.154	CTX	NKAIN3	Human	7.5062e-33	100
1.33439e-50	1.89101	0.323	0.075	CTX	NPAS3	Human	1.09655e-39	100
1.4527e-65	1.85885	0.328	0.045	CTX	ATRNL1	Human	1.25662e-52	100
2.94454e-34	1.84093	0.441	0.241	CTX	ROBO2	Human	5.11788e-27	100
1.03309e-53	1.67317	0.396	0.131	CTX	TTC28	Human	1.00051e-36	100
4.03635e-55	1.66023	0.233	0.01	CTX	NRG3	Human	1.75673e-48	100
1.91247e-62	1.63593	0.304	0.034	CTX	IGFBPL1	Human	2.32002e-47	100
1.63933e-50	1.60707	0.292	0.052	CTX	CTNNA2	Human	4.22166e-36	100
5.51288e-56	1.51515	0.305	0.05	CTX	KCNH7	Human	1.71044e-46	100
1.62503e-53	1.45712	0.276	0.035	CTX	MAML3	Human	2.12338e-45	100
4.28417e-42	1.45376	0.241	0.039	CTX	NLGN1	Human	2.3023e-24	100
3.37525e-41	1.44642	0.48	0.242	CTX	SOX5	Human	7.33568e-31	100
8.43054e-30	1.43601	0.335	0.149	CTX	GPC6	Human	4.30846e-17	100
6.40427e-28	1.40613	0.212	0.053	CTX	NAV3	Human	2.79627e-19	100
7.78138e-42	1.38536	0.335	0.102	CTX	DLGAP1	Human	2.83168e-24	100
1.1572e-47	1.36708	0.452	0.198	CTX	TCF12	Human	8.04337e-32	100
8.17366e-47	1.3457	0.356	0.105	CTX	SSH2	Human	3.6814e-25	100
1.01286e-48	1.33923	0.314	0.068	CTX	PTPRD	Human	2.81098e-39	100
3.87482e-58	1.32023	0.284	0.031	CTX	PPM1E	Human	1.09994e-47	100
2.32141e-34	1.29988	0.434	0.233	CTX	AKT3	Human	1.24758e-18	100
6.88831e-32	1.28633	0.322	0.126	CTX	ENOX1	Human	1.08191e-23	100
6.04271e-11	1.27214	0.26	0.161	CTX	SNTG1	Human	0.000360517	100
1.38718e-43	1.23885	0.239	0.033	CTX	KCNB2	Human	1.23187e-30	100
2.16674e-26	1.22372	0.299	0.124	CTX	EPHA3	Human	1.51914e-16	100
3.28597e-48	1.22014	0.307	0.066	CTX	TMEM178B	Human	6.33922e-36	100
8.77674e-21	1.20473	0.312	0.157	CTX	PDZRN3	Human	1.00912e-07	100
3.39133e-54	1.19715	0.569	0.3	CTX	RERE	Human	7.20625e-36	100
3.26342e-37	1.18431	0.258	0.061	CTX	PDE4D	Human	4.15799e-23	100
1.59035e-26	1.17166	0.201	0.05	CTX	CCSER1	Human	4.84997e-16	100
6.80467e-43	1.16871	0.332	0.1	CTX	PARD3	Human	5.4423e-29	100
3.94603e-23	1.1684	0.256	0.099	CTX	ANKS1B	Human	2.66052e-18	100
6.8658e-40	1.16824	0.266	0.059	CTX	TMTC2	Human	3.35849e-19	100
1.30879e-53	1.14897	0.268	0.031	CTX	FBXL7	Human	2.20325e-39	100
1.64004e-35	1.14188	0.323	0.111	CTX	PHACTR1	Human	7.65254e-24	100
1.16774e-25	1.1363	0.154	0.024	CTX	DCC	Human	1.02313e-17	100
5.19094e-28	1.11741	0.418	0.238	CTX	SETBP1	Human	9.97871e-21	100
1.4627e-56	1.10999	0.241	0.012	CTX	SDK1	Human	2.35203e-41	100
5.90447e-33	1.10029	0.355	0.152	CTX	IGF2BP3	Human	7.03322e-25	100
4.4495e-42	1.09784	0.289	0.068	CTX	KALRN	Human	3.45274e-33	100
4.15032e-26	1.0956	0.434	0.263	CTX	MAGI1	Human	7.75632e-15	100
1.61501e-40	1.09545	0.183	0.011	CTX	PLCB1	Human	1.03511e-25	100
1.63712e-39	1.09514	0.243	0.045	CTX	DACH1	Human	4.46235e-25	100
7.89097e-45	1.09187	0.272	0.051	CTX	GPHN	Human	3.26726e-37	100
5.60887e-24	1.07993	0.35	0.182	CTX	DCLK1	Human	1.13503e-18	100
2.83187e-44	1.0734	0.251	0.038	CTX	BACH2	Human	4.21243e-35	100
1.12227e-51	1.0565	0.245	0.021	CTX	GRIP1	Human	1.78498e-42	100
7.99433e-39	1.05502	0.259	0.057	CTX	WWOX	Human	2.83931e-21	100
2.8445e-30	1.04689	0.333	0.14	CTX	ARID1B	Human	4.80074e-21	100
9.68202e-33	1.03014	0.33	0.127	CTX	EXOC4	Human	5.92108e-23	100
2.64119e-35	1.01773	0.198	0.029	CTX	CACNA2D1	Human	9.02755e-23	100
1.80162e-57	1.01716	0.255	0.016	CTX	TMEFF1	Human	3.05066e-51	100
7.87709e-34	1.0142	0.254	0.064	CTX	FGF13	Human	1.05307e-20	100
6.58485e-40	0.996911	0.29	0.074	CTX	PHLPP1	Human	1.6827e-28	100
2.9362e-44	0.995918	0.348	0.102	CTX	ZFAND3	Human	1.80851e-30	100
8.8151e-44	0.98583	0.24	0.034	CTX	EXT1	Human	9.77343e-36	100
4.23254e-42	0.980823	0.245	0.041	CTX	XYLT1	Human	1.17663e-23	100
8.41484e-54	0.979877	0.281	0.037	CTX	MBD5	Human	4.52791e-37	100
9.57893e-13	0.973361	0.314	0.207	CTX	PBX3	Human	0.000159334	100
7.44452e-50	0.973212	0.225	0.015	CTX	FRMD5	Human	1.88927e-37	100
5.44613e-14	0.945821	0.118	0.031	CTX	RBFOX1	Human	1.88319e-09	100
2.1176e-40	0.942928	0.35	0.117	CTX	CDKAL1	Human	1.64434e-24	100
5.75102e-32	0.937538	0.323	0.121	CTX	IGF2BP2	Human	2.8892e-25	100
1.18984e-36	0.933908	0.286	0.079	CTX	CTNND2	Human	1.72354e-21	100
2.31716e-37	0.931816	0.49	0.263	CTX	JMJD1C	Human	5.20295e-18	100
2.50593e-23	0.930891	0.388	0.222	CTX	PSD3	Human	2.0196e-13	100
1.07622e-28	0.930411	0.437	0.247	CTX	TSPAN5	Human	1.36796e-14	100
3.46457e-17	0.92338	0.227	0.098	CTX	CADM2	Human	5.00575e-11	100
1.67825e-29	0.921394	0.428	0.236	CTX	RNF130	Human	4.79283e-17	100
4.62617e-40	0.918613	0.281	0.069	CTX	TRIO	Human	4.37735e-29	100
9.59244e-38	0.915913	0.21	0.03	CTX	PDE4B	Human	2.81426e-21	100
5.23711e-28	0.912123	0.26	0.086	CTX	ST6GALNAC5	Human	1.36405e-18	100
1.59838e-17	0.901304	0.369	0.232	CTX	CLASP2	Human	3.28659e-10	100
6.53581e-43	0.900134	0.272	0.053	CTX	BRAF	Human	1.97147e-32	100
1.26847e-15	0.8995	0.176	0.066	CTX	SLC8A1	Human	5.5633e-09	100
6.77175e-35	0.894851	0.255	0.062	CTX	ZSWIM6	Human	7.60288e-25	100
2.83345e-34	0.871288	0.297	0.094	CTX	ZNF609	Human	4.38299e-19	100
3.95506e-23	0.868279	0.333	0.161	CTX	KLF12	Human	2.75944e-14	100
2.50392e-25	0.865832	0.151	0.024	CTX	DLG2	Human	2.1337e-15	100
3.348e-25	0.864329	0.297	0.124	CTX	MED13L	Human	3.4355e-16	100
1.43433e-22	0.849786	0.283	0.119	CTX	SYT1	Human	1.59842e-08	100
1.17445e-28	0.848819	0.656	0.539	CTX	MAP2	Human	1.61877e-19	100
1.03673e-35	0.848111	0.274	0.073	CTX	CDK14	Human	5.6624e-24	100
2.59342e-33	0.847999	0.32	0.113	CTX	FAF1	Human	1.45754e-17	100
5.11229e-29	0.847423	0.354	0.159	CTX	PTK2	Human	1.64184e-17	100
3.14359e-26	0.843542	0.293	0.115	CTX	TBC1D5	Human	3.22976e-15	100
3.49671e-33	0.842282	0.295	0.092	CTX	HDAC9	Human	2.19392e-21	100
6.46227e-30	0.831079	0.146	0.012	CTX	IL1RAPL1	Human	3.36806e-18	100
4.27702e-38	0.828963	0.227	0.038	CTX	SVIL	Human	1.31088e-29	100
1.40862e-44	0.825793	0.259	0.042	CTX	EXOC6B	Human	2.1494e-29	100
3.16439e-46	0.823974	0.218	0.017	CTX	ARL15	Human	5.92992e-32	100
8.15315e-38	0.822554	0.249	0.052	CTX	FCHSD2	Human	2.0589e-26	100
9.87684e-37	0.81973	0.224	0.039	CTX	PRKD1	Human	8.61166e-26	100
4.68832e-30	0.813123	0.242	0.066	CTX	CECR2	Human	2.05936e-24	100
2.5442e-60	0.812457	0.255	0.01	CTX	ATP6V0C	Human	8.64382e-53	100
2.05711e-40	0.808428	0.247	0.044	CTX	SLCO5A1	Human	3.26383e-23	100
4.53077e-27	0.801397	0.186	0.038	CTX	AFF3	Human	1.00294e-22	100
4.14704e-32	0.799845	0.27	0.081	CTX	DIP2C	Human	3.78149e-22	100
1.96931e-42	0.799059	0.228	0.03	CTX	PDE10A	Human	9.29919e-34	100
3.3131e-41	0.796031	0.269	0.055	CTX	AGAP1	Human	1.50429e-23	100
5.9163e-30	0.791669	0.146	0.012	CTX	ZFPM2	Human	2.72684e-18	100
9.76334e-20	0.791385	0.215	0.078	CTX	KCNQ3	Human	3.01313e-14	100
1.137e-27	0.784875	0.23	0.063	CTX	KCNH8	Human	1.18641e-23	100
3.56963e-15	0.784797	0.45	0.324	CTX	STAG1	Human	5.82314e-09	100
1.03028e-28	0.78252	0.217	0.052	CTX	GPR137C	Human	1.28934e-19	100
2.21733e-22	0.779745	0.433	0.266	CTX	PTBP2	Human	4.59284e-12	100
6.04822e-29	0.779252	0.236	0.065	CTX	SMYD3	Human	1.47359e-12	100
8.40007e-32	0.778333	0.317	0.115	CTX	EIF4G3	Human	1.58947e-13	100
9.80329e-32	0.777145	0.198	0.036	CTX	KAZN	Human	5.88212e-25	100
2.58921e-12	0.774462	0.519	0.449	CTX	NEDD4L	Human	0.00043568	100
1.36733e-23	0.769142	0.22	0.069	CTX	RIMS2	Human	4.35325e-14	100
2.16526e-19	0.763236	0.344	0.181	CTX	BICD1	Human	7.28706e-11	100
8.44398e-29	0.759735	0.295	0.109	CTX	IGF1R	Human	8.43988e-19	100
7.79969e-14	0.758118	0.415	0.304	CTX	CERS6	Human	3.22362e-05	100
1.32142e-34	0.75561	0.268	0.071	CTX	FHOD3	Human	1.77848e-21	100
2.38915e-14	0.752603	0.364	0.236	CTX	STK39	Human	0.000253325	100
1.52578e-16	0.75056	0.369	0.228	CTX	LCORL	Human	1.76247e-10	100
1.31033e-29	0.745063	0.282	0.095	CTX	SBF2	Human	2.47896e-17	100
1.07041e-20	0.741057	0.285	0.123	CTX	FRMD4A	Human	5.72804e-14	100
3.43924e-21	0.739753	0.277	0.118	CTX	CLASP1	Human	1.29414e-16	100
1.25293e-18	0.736677	0.226	0.091	CTX	ROBO1	Human	2.03143e-07	100
1.70456e-13	0.735419	0.444	0.32	CTX	GABARAP	Human	3.30859e-06	100
7.94895e-18	0.732008	0.459	0.312	CTX	PAK3	Human	1.06512e-09	100
4.00233e-30	0.730214	0.25	0.073	CTX	CENPP	Human	1.012e-12	100
2.25869e-27	0.72598	0.296	0.113	CTX	RFX3	Human	1.03165e-14	100
1.45315e-30	0.723232	0.413	0.199	CTX	DDX39B	Human	1.06276e-15	100
7.92853e-21	0.718965	0.287	0.124	CTX	MAPK10	Human	1.12779e-13	100
9.03311e-21	0.718874	0.277	0.121	CTX	SLC35F1	Human	2.7869e-10	100
1.0249e-29	0.718171	0.215	0.05	CTX	WDPCP	Human	2.87944e-14	100
3.24047e-21	0.717352	0.261	0.109	CTX	SCMH1	Human	1.83476e-12	100
5.67784e-39	0.717327	0.203	0.023	CTX	HMGA2	Human	2.23837e-22	100
6.33925e-21	0.715671	0.18	0.05	CTX	PCDH11X	Human	8.9064e-13	100
5.60847e-16	0.714615	0.314	0.171	CTX	CRB1	Human	4.73977e-08	100
4.5598e-24	0.712634	0.321	0.146	CTX	FYN	Human	2.40559e-10	100
2.32534e-36	0.711189	0.151	0.004	CTX	TENM4	Human	1.19416e-28	100
1.3548e-29	0.710958	0.301	0.109	CTX	NCOA1	Human	6.57292e-12	100
1.22331e-57	0.710457	0.973	0.771	CTX	MARCKSL1	Human	4.63988e-42	100
2.6934e-35	0.704149	0.251	0.058	CTX	FUT9	Human	1.27198e-19	100
9.5263e-25	0.696684	0.287	0.116	CTX	PPP6R3	Human	3.54418e-15	100
7.59702e-15	0.695935	0.208	0.092	CTX	IMMP2L	Human	7.13469e-12	100
1.21018e-46	0.694439	0.251	0.031	CTX	ESR2	Human	2.67527e-28	100
1.16973e-11	0.692206	0.382	0.27	CTX	ANK2	Human	0.000596423	100
2.11572e-24	0.6912	0.267	0.099	CTX	CBFA2T2	Human	2.73078e-12	100
4.71013e-30	0.691131	0.215	0.05	CTX	GLI3	Human	8.8725e-17	100
1.46318e-31	0.690658	0.316	0.113	CTX	SARNP	Human	9.67894e-17	100
6.55663e-20	0.689309	0.234	0.09	CTX	ST18	Human	5.38967e-12	100
2.50461e-12	0.688601	0.294	0.181	CTX	TEAD1	Human	1.33812e-06	100
6.8854e-35	0.687199	0.287	0.076	CTX	RNASEK	Human	1.42602e-24	100
1.96476e-39	0.686345	0.185	0.013	CTX	ERC2	Human	2.07691e-26	100
3.64178e-18	0.684579	0.427	0.282	CTX	ZEB1	Human	2.9617e-05	100
6.3416e-27	0.684366	0.143	0.016	CTX	CNTN4	Human	6.35649e-20	100
4.41574e-20	0.683977	0.249	0.101	CTX	PTPRN2	Human	2.18788e-13	100
3.56096e-36	0.68204	0.175	0.014	CTX	RORA	Human	2.59046e-21	100
1.28684e-11	0.681902	0.2	0.098	CTX	SMOC1	Human	0.000324638	100
1.49786e-31	0.679238	0.187	0.029	CTX	CADPS	Human	2.00458e-18	100
4.03372e-26	0.675701	0.236	0.073	CTX	RFX7	Human	8.49065e-17	100
1.00231e-34	0.672092	0.208	0.033	CTX	FAM168A	Human	3.69217e-22	100
1.06332e-22	0.670179	0.351	0.177	CTX	MAPK8	Human	6.1051e-12	100
6.24236e-26	0.669743	0.23	0.069	CTX	CASK	Human	3.06821e-16	100
4.35604e-08	0.669724	0.423	0.352	CTX	SSBP2	Human	8.98974e-06	100
2.66497e-22	0.669398	0.234	0.082	CTX	NTM	Human	1.26783e-08	100
5.64271e-17	0.667182	0.303	0.158	CTX	EHBP1	Human	1.67114e-08	100
7.77103e-22	0.66704	0.247	0.094	CTX	NXN	Human	5.42406e-11	100
9.54909e-22	0.662376	0.175	0.046	CTX	ZNF804A	Human	3.69791e-13	100
9.63897e-18	0.661203	0.293	0.144	CTX	PLEKHA5	Human	2.36149e-09	100
1.1036e-23	0.65823	0.248	0.087	CTX	MMP16	Human	2.56127e-15	100
7.14253e-39	0.657421	0.21	0.026	CTX	FMN2	Human	1.49642e-25	100
3.21778e-24	0.655526	0.416	0.228	CTX	PTPRS	Human	7.40842e-09	100
5.58198e-20	0.646563	0.201	0.067	CTX	PRKCA	Human	1.46281e-08	100
4.13382e-22	0.644511	0.286	0.121	CTX	KIAA1958	Human	3.44279e-09	100
5.28147e-16	0.640444	0.122	0.029	CTX	NRG1	Human	7.27017e-10	100
5.45175e-31	0.640375	0.177	0.025	CTX	RAD51B	Human	1.22416e-20	100
6.56308e-22	0.639789	0.258	0.101	CTX	CAMK1D	Human	1.42007e-11	100
6.85003e-21	0.634718	0.122	0.018	CTX	LHFPL3	Human	5.27612e-18	100
2.9655e-10	0.632287	0.333	0.224	CTX	BMPR2	Human	3.31002e-06	100
1.30652e-26	0.629959	0.24	0.073	CTX	PKD2	Human	5.18563e-15	100
1.31846e-31	0.628237	0.156	0.014	CTX	PTPRG	Human	1.4544e-21	100
9.55302e-31	0.627721	0.212	0.044	CTX	RABGAP1L	Human	1.65486e-17	100
9.09506e-13	0.627463	0.407	0.289	CTX	KIF1B	Human	7.36101e-09	100
4.18773e-25	0.626742	0.298	0.12	CTX	PHF21B	Human	1.25647e-13	100
1.1135e-18	0.625819	0.346	0.189	CTX	PUM2	Human	4.36612e-11	100
1.63428e-28	0.622805	0.154	0.018	CTX	GALNT13	Human	3.3313e-19	100
1.60056e-24	0.619227	0.281	0.108	CTX	NHSL1	Human	7.63661e-14	100
1.5605e-29	0.618729	0.235	0.06	CTX	NRF1	Human	1.62327e-15	100
2.82668e-37	0.617249	0.237	0.041	CTX	HYPK	Human	5.7444e-29	100
2.19144e-33	0.61564	0.223	0.043	CTX	RAPH1	Human	3.84132e-23	100
1.16707e-21	0.614357	0.342	0.171	CTX	NF1	Human	5.27618e-11	100
1.33794e-18	0.6139	0.285	0.135	CTX	SREBF2	Human	4.65901e-08	100
6.48355e-22	0.613202	0.308	0.138	CTX	TNKS	Human	2.51872e-09	100
4.80676e-39	0.610965	0.239	0.04	CTX	ZNF565	Human	3.95766e-24	100
4.97424e-30	0.610338	0.272	0.079	CTX	NME2	Human	1.01773e-18	100
5.31286e-25	0.609773	0.448	0.256	CTX	RBFOX2	Human	1.13833e-06	100
5.85641e-18	0.60634	0.248	0.113	CTX	DYRK1A	Human	7.55169e-06	100
1.00463e-29	0.605256	0.152	0.015	CTX	DPP10	Human	4.691e-19	100
1.7972e-27	0.604957	0.215	0.054	CTX	GABRB3	Human	1.15961e-08	100
9.78235e-33	0.603576	0.226	0.047	CTX	VPS13B	Human	5.26938e-15	100
1.92145e-32	0.603022	0.156	0.012	CTX	DOCK3	Human	1.30259e-23	100
1.97799e-33	0.602539	0.159	0.012	CTX	AHCYL2	Human	1.89854e-23	100
7.98105e-13	0.601143	0.33	0.197	CTX	ELAVL2	Human	1.41071e-05	100
6.6074e-11	0.600177	0.361	0.251	CTX	POU2F1	Human	1.21582e-06	100
2.57184e-20	0.599379	0.323	0.159	CTX	KIF5C	Human	1.25607e-07	100
2.4204e-14	0.598822	0.327	0.195	CTX	KANSL1	Human	8.04161e-07	100
5.52782e-15	0.598272	0.447	0.31	CTX	TRIM2	Human	0.000512577	100
5.02113e-24	0.596358	0.226	0.071	CTX	SPECC1L	Human	2.0117e-18	100
1.21792e-36	0.594572	0.171	0.011	CTX	BTBD9	Human	1.83739e-25	100
5.88695e-23	0.592759	0.266	0.103	CTX	DENND5B	Human	2.3681e-11	100
4.52349e-24	0.591178	0.217	0.065	CTX	NCOA2	Human	8.75136e-14	100
6.229e-31	0.590419	0.156	0.015	CTX	HS6ST2	Human	8.30994e-20	100
7.05635e-20	0.588966	0.319	0.155	CTX	GSK3B	Human	4.52211e-12	100
2.07419e-21	0.586721	0.141	0.027	CTX	SLC44A5	Human	1.41114e-17	100
2.41882e-21	0.58621	0.31	0.14	CTX	PSMA6	Human	3.26667e-12	100
2.51652e-25	0.585677	0.318	0.131	CTX	FER	Human	1.50488e-07	100
1.62548e-32	0.582924	0.174	0.02	CTX	KCNT2	Human	8.58291e-24	100
3.37952e-21	0.578715	0.398	0.214	CTX	IGFBP2	Human	8.85697e-08	100
1.37901e-18	0.576227	0.271	0.119	CTX	SOS1	Human	3.0137e-11	100
7.14175e-20	0.575821	0.118	0.018	CTX	FAM155A	Human	2.70939e-13	100
4.92354e-29	0.575145	0.323	0.128	CTX	ITFG1	Human	1.27293e-08	100
3.28861e-17	0.574536	0.292	0.144	CTX	NETO2	Human	1.02375e-10	100
1.41971e-27	0.573124	0.173	0.03	CTX	SUMF1	Human	2.79086e-23	100
8.26521e-28	0.572978	0.226	0.059	CTX	FMNL2	Human	1.19546e-13	100
3.93303e-16	0.571396	0.358	0.21	CTX	FBXO11	Human	2.01512e-06	100
7.73258e-16	0.571257	0.261	0.127	CTX	DLG1	Human	8.5683e-10	100
2.0954e-17	0.569403	0.381	0.216	CTX	SRRM4	Human	2.26081e-08	100
4.06515e-24	0.568701	0.236	0.077	CTX	SLC25A12	Human	1.99999e-12	100
1.47618e-32	0.565975	0.2	0.033	CTX	SIK3	Human	8.25954e-18	100
2.92446e-21	0.564052	0.208	0.069	CTX	SPIDR	Human	6.21027e-09	100
1.56878e-26	0.561552	0.221	0.06	CTX	PPM1L	Human	3.4937e-12	100
7.88855e-22	0.560412	0.22	0.074	CTX	PELI2	Human	5.15286e-11	100
5.52013e-21	0.55917	0.251	0.096	CTX	NBEA	Human	6.05618e-11	100
5.66859e-20	0.558805	0.201	0.065	CTX	STXBP5L	Human	8.1965e-10	100
1.7635e-29	0.558201	0.154	0.016	CTX	CDON	Human	8.42503e-18	100
5.0895e-16	0.557808	0.143	0.041	CTX	MEF2C	Human	0.000292297	100
9.63392e-30	0.55737	0.225	0.054	CTX	SUPT3H	Human	2.64454e-14	100
2.33216e-11	0.556048	0.423	0.316	CTX	MACF1	Human	0.000779098	100
7.37852e-20	0.554047	0.21	0.073	CTX	RAPGEF2	Human	3.34295e-12	100
3.82842e-21	0.550759	0.411	0.23	CTX	PTPRA	Human	2.21224e-10	100
8.99909e-27	0.550543	0.194	0.043	CTX	TRAPPC9	Human	2.41231e-15	100
2.47752e-26	0.549554	0.153	0.022	CTX	TMEM108	Human	5.18501e-12	100
1.96937e-34	0.548188	0.221	0.042	CTX	TPST1	Human	1.94145e-13	100
2.77355e-23	0.545006	0.272	0.104	CTX	ACAP2	Human	3.73794e-12	100
4.16782e-22	0.543071	0.21	0.066	CTX	MEIS1	Human	5.98291e-07	100
1.30068e-20	0.542452	0.286	0.127	CTX	PRIM2	Human	2.44249e-07	100
1.22552e-24	0.541232	0.135	0.017	CTX	NAALADL2	Human	1.9516e-15	100
6.88586e-21	0.540593	0.296	0.131	CTX	MAP4K5	Human	1.65506e-09	100
7.06156e-15	0.540194	0.251	0.124	CTX	ARIH1	Human	4.38039e-06	100
5.84732e-21	0.539265	0.162	0.038	CTX	SYT14	Human	3.2691e-18	100
1.6723e-13	0.537518	0.335	0.207	CTX	MLLT10	Human	1.54741e-05	100
1.18402e-26	0.534476	0.166	0.029	CTX	PDE3B	Human	2.55962e-13	100
3.90992e-10	0.533412	0.288	0.184	CTX	DNAJC1	Human	0.00102151	100
3.84001e-25	0.532809	0.233	0.069	CTX	WDFY3	Human	1.86885e-13	100
7.46516e-18	0.53278	0.153	0.042	CTX	PIP5K1B	Human	2.32428e-11	100
1.24427e-21	0.53193	0.232	0.081	CTX	CHN1	Human	2.81659e-14	100
7.51529e-21	0.531744	0.222	0.076	CTX	YEATS2	Human	9.82246e-13	100
1.59339e-14	0.531027	0.35	0.216	CTX	CCNH	Human	3.968e-05	100
1.12268e-20	0.530996	0.207	0.067	CTX	SPIRE1	Human	1.43677e-12	100
5.69589e-22	0.529763	0.221	0.073	CTX	LDLRAD3	Human	8.3416e-11	100
4.30404e-09	0.527966	0.276	0.175	CTX	CDK19	Human	9.62724e-05	100
6.89184e-31	0.527167	0.169	0.021	CTX	DGKI	Human	2.24426e-23	100
3.15063e-31	0.525418	0.209	0.04	CTX	MAP4K3	Human	1.51615e-17	100
2.87113e-20	0.524177	0.157	0.038	CTX	PITPNC1	Human	7.08872e-18	100
2.50629e-17	0.524166	0.222	0.088	CTX	PAN3	Human	2.44802e-08	100
8.12333e-13	0.521076	0.242	0.123	CTX	MAGI3	Human	1.21012e-05	100
7.06114e-23	0.520611	0.221	0.071	CTX	RC3H1	Human	8.39471e-12	100
4.83506e-24	0.520494	0.314	0.138	CTX	REV3L	Human	2.77425e-07	100
1.21941e-19	0.518578	0.257	0.107	CTX	RASAL2	Human	1.53529e-05	100
1.32726e-22	0.517516	0.17	0.04	CTX	MAGI2	Human	3.72689e-09	100
3.34338e-37	0.517257	0.184	0.016	CTX	DSE	Human	1.86063e-23	100
7.24764e-21	0.515687	0.228	0.079	CTX	AGTPBP1	Human	3.85324e-13	100
1.34232e-28	0.515382	0.171	0.027	CTX	NRCAM	Human	2.52886e-15	100
4.01697e-14	0.514387	0.303	0.167	CTX	USP39	Human	4.1709e-05	100
2.20235e-23	0.514309	0.401	0.22	CTX	APP	Human	1.39071e-06	100
8.03245e-22	0.514245	0.266	0.105	CTX	ANKIB1	Human	1.21738e-07	100
5.64592e-26	0.5136	0.142	0.017	CTX	XKR6	Human	6.93933e-20	100
1.92968e-25	0.513041	0.825	0.592	CTX	CENPV	Human	1.11164e-17	100
1.5932e-15	0.513027	0.392	0.245	CTX	SETD5	Human	5.78097e-06	100
5.99916e-26	0.51106	0.812	0.65	CTX	EIF4A1	Human	1.54517e-13	100
2.24853e-30	0.508571	0.161	0.018	CTX	KHDRBS2	Human	8.25706e-18	100
1.3825e-25	0.507691	0.181	0.038	CTX	PLCB4	Human	9.26955e-17	100
9.04572e-29	0.507048	0.215	0.05	CTX	BMPR1A	Human	1.0415e-11	100
4.82219e-25	0.505579	0.783	0.572	CTX	HES6	Human	5.53811e-11	100
7.12489e-15	0.504388	0.227	0.104	CTX	KIAA1328	Human	5.38277e-05	100
4.54224e-16	0.502196	0.247	0.113	CTX	MIB1	Human	3.36316e-07	100
1.73724e-27	0.500944	0.549	0.307	CTX	PSMA2	Human	2.5145e-13	100
1.25481e-23	0.499521	0.153	0.028	CTX	PTPRK	Human	2.00996e-13	100
6.06408e-18	0.496793	0.195	0.068	CTX	MAST2	Human	2.52538e-11	100
4.40315e-19	0.496189	0.208	0.073	CTX	ELP4	Human	7.17992e-11	100
1.8743e-21	0.49543	0.305	0.136	CTX	RAB8B	Human	4.81031e-08	100
1.99704e-33	0.495397	0.189	0.025	CTX	ZDHHC20	Human	3.39177e-15	100
3.12201e-17	0.495397	0.172	0.054	CTX	PPFIA2	Human	1.46201e-05	100
1.31466e-22	0.493832	0.316	0.136	CTX	BIRC6	Human	1.36778e-06	100
3.26803e-18	0.493661	0.224	0.087	CTX	ANTXR1	Human	1.90858e-11	100
6.59818e-16	0.493484	0.177	0.064	CTX	TOX	Human	1.23691e-05	100
5.72681e-21	0.493056	0.14	0.028	CTX	NCKAP5	Human	1.06945e-11	100
2.24612e-18	0.492969	0.265	0.115	CTX	PHF21A	Human	2.66041e-08	100
1.4962e-24	0.49135	0.249	0.081	CTX	CRLF3	Human	1.82609e-12	100
7.34627e-32	0.491218	0.179	0.024	CTX	MGAT5	Human	1.22281e-17	100
6.3339e-34	0.491066	0.132	0	CTX	ANKUB1	Human	6.4995e-28	100
3.18793e-28	0.489155	0.178	0.031	CTX	GPR173	Human	9.40991e-20	100
2.32291e-14	0.489095	0.259	0.13	CTX	CDC42BPA	Human	4.75506e-07	100
1.38776e-18	0.485266	0.171	0.05	CTX	PTPRO	Human	6.47424e-11	100
2.58279e-13	0.485124	0.357	0.224	CTX	KMT2C	Human	0.00119794	100
4.72722e-22	0.484169	0.2	0.059	CTX	FGD4	Human	3.68175e-12	100
4.87717e-19	0.482708	0.2	0.069	CTX	TANC2	Human	1.29658e-06	100
1.30937e-20	0.481807	0.232	0.084	CTX	ZC3H12C	Human	1.9722e-09	100
1.8385e-32	0.479914	0.161	0.014	CTX	GAB2	Human	8.62473e-21	100
7.42896e-14	0.479742	0.292	0.156	CTX	ANKRD17	Human	1.26756e-06	100
5.10377e-13	0.477581	0.245	0.124	CTX	RNF38	Human	2.12845e-05	100
4.41042e-19	0.477495	0.224	0.082	CTX	TMCC1	Human	2.542e-09	100
4.28747e-22	0.476766	0.2	0.058	CTX	ARHGAP32	Human	5.70518e-10	100
7.21641e-21	0.472437	0.203	0.064	CTX	MEMO1	Human	3.42171e-11	100
6.57538e-29	0.471593	0.212	0.048	CTX	CDK8	Human	1.30485e-14	100
3.29736e-19	0.470278	0.182	0.055	CTX	GLI2	Human	4.99081e-11	100
7.13087e-30	0.469433	0.177	0.027	CTX	RAPGEF6	Human	1.52634e-16	100
1.30711e-29	0.467491	0.217	0.046	CTX	MRPS24	Human	2.18396e-19	100
8.30927e-18	0.466617	0.242	0.099	CTX	MEF2A	Human	1.13574e-08	100
6.33274e-09	0.465331	0.195	0.106	CTX	GTDC1	Human	3.24877e-06	100
6.61129e-11	0.464825	0.601	0.488	CTX	TFDP2	Human	7.88444e-06	100
2.27346e-27	0.46353	0.141	0.014	CTX	DOCK4	Human	1.01694e-16	100
8.34442e-18	0.46338	0.256	0.112	CTX	PDE7A	Human	4.41143e-06	100
1.53802e-19	0.462913	0.199	0.067	CTX	CRADD	Human	1.60719e-05	100
1.04047e-18	0.462709	0.325	0.165	CTX	ADK	Human	3.47315e-05	100
3.67002e-25	0.462339	0.18	0.038	CTX	SIPA1L2	Human	7.72311e-16	100
1.78119e-24	0.462269	0.191	0.047	CTX	ITCH	Human	1.47776e-13	100
7.86475e-19	0.46195	0.153	0.038	CTX	CHST11	Human	5.80678e-12	100
8.31642e-25	0.461238	0.122	0.01	CTX	FILIP1L	Human	1.39778e-19	100
3.63595e-12	0.461189	0.14	0.052	CTX	STXBP6	Human	2.16726e-05	100
1.2895e-15	0.461011	0.302	0.158	CTX	PIBF1	Human	3.40678e-06	100
1.33148e-16	0.460675	0.253	0.117	CTX	FUT8	Human	2.11199e-08	100
4.65225e-18	0.460407	0.186	0.061	CTX	LRCH1	Human	1.8191e-13	100
1.65543e-14	0.460058	0.271	0.137	CTX	PKIA	Human	0.000124738	100
4.10191e-15	0.459532	0.236	0.106	CTX	GPS2	Human	1.30097e-10	100
3.61205e-12	0.45891	0.215	0.104	CTX	CEP128	Human	6.94095e-05	100
5.51819e-27	0.45851	0.463	0.234	CTX	LUC7L2	Human	2.951e-08	100
5.63549e-16	0.457888	0.251	0.115	CTX	DOCK7	Human	1.9528e-07	100
9.73136e-17	0.457343	0.272	0.13	CTX	MKLN1	Human	1.02152e-05	100
4.78092e-23	0.456616	0.15	0.028	CTX	FANCC	Human	1.31505e-12	100
3.02218e-20	0.456362	0.22	0.078	CTX	WRN	Human	9.98431e-10	100
4.90639e-20	0.456104	0.202	0.065	CTX	VTI1A	Human	1.73759e-10	100
6.32837e-24	0.455023	0.208	0.058	CTX	CCNY	Human	7.30714e-08	100
1.5267e-09	0.454576	0.24	0.136	CTX	TIAM1	Human	0.000432291	100
2.12185e-13	0.453871	0.265	0.138	CTX	MARK1	Human	0.000831219	100
8.19682e-23	0.453116	0.25	0.088	CTX	PANK2	Human	5.73689e-12	100
2.93169e-17	0.452375	0.2	0.073	CTX	FOXJ3	Human	1.01645e-09	100
1.94533e-15	0.451887	0.255	0.118	CTX	NDUFAF6	Human	2.12037e-06	100
3.99626e-26	0.451528	0.148	0.02	CTX	DENND1A	Human	1.36712e-13	100
4.28956e-15	0.449969	0.322	0.175	CTX	TNRC6A	Human	0.00049041	100
1.3654e-10	0.449677	0.24	0.132	CTX	ZCCHC7	Human	0.000132881	100
1.35634e-18	0.446672	0.273	0.124	CTX	ASAP2	Human	3.94305e-07	100
6.22106e-18	0.44548	0.105	0.015	CTX	SEMA6D	Human	1.56157e-13	100
4.74e-24	0.44438	0.169	0.035	CTX	PCCA	Human	7.18466e-14	100
3.85224e-12	0.444155	0.158	0.064	CTX	AKAP6	Human	9.18682e-06	100
2.12971e-18	0.442978	0.194	0.066	CTX	ATP2B4	Human	8.66051e-07	100
7.74094e-22	0.442665	0.193	0.052	CTX	SCHIP1	Human	5.38884e-14	100
2.06128e-12	0.442627	0.497	0.361	CTX	SMARCC1	Human	2.98646e-05	100
2.2282e-20	0.44201	0.259	0.105	CTX	PICALM	Human	3.85246e-06	100
2.45e-10	0.442008	0.508	0.381	CTX	GADD45G	Human	0.0011201	100
9.71645e-19	0.441235	0.202	0.07	CTX	RANBP17	Human	3.40873e-06	100
2.87751e-34	0.439261	0.203	0.031	CTX	ZNF654	Human	1.31406e-14	100
7.15864e-13	0.437355	0.287	0.159	CTX	CPE	Human	7.52316e-06	100
4.81387e-16	0.437044	0.214	0.087	CTX	SPATA5	Human	1.92716e-06	100
5.98652e-10	0.436751	0.181	0.089	CTX	ABHD3	Human	5.99674e-06	100
9.99279e-19	0.435607	0.217	0.079	CTX	RASA2	Human	1.17216e-07	100
4.81544e-24	0.435503	0.211	0.059	CTX	UBE2V1	Human	4.17725e-13	100
1.29628e-20	0.435461	0.188	0.054	CTX	UBE2E2	Human	2.27679e-07	100
3.71306e-14	0.435275	0.266	0.135	CTX	PPP3CA	Human	5.13368e-05	100
2.00166e-15	0.434404	0.267	0.129	CTX	R3HDM2	Human	1.01098e-07	100
7.61844e-24	0.433821	0.175	0.039	CTX	COG5	Human	1.67073e-13	100
4.15182e-21	0.433654	0.206	0.066	CTX	DENND4C	Human	1.70535e-05	100
1.50703e-18	0.433334	0.266	0.116	CTX	PELI1	Human	3.15641e-07	100
6.26903e-15	0.433318	0.293	0.156	CTX	FNDC3A	Human	0.000162973	100
6.40163e-18	0.433081	0.237	0.097	CTX	JAM3	Human	3.45767e-05	100
4.28276e-16	0.431831	0.168	0.056	CTX	TET3	Human	4.21988e-10	100
1.15567e-17	0.429927	0.257	0.112	CTX	CAMSAP2	Human	2.69957e-05	100
2.08985e-13	0.428193	0.175	0.07	CTX	PKP4	Human	7.49835e-06	100
6.14263e-19	0.427964	0.152	0.038	CTX	PLCL2	Human	2.73094e-12	100
3.38972e-13	0.423198	0.178	0.073	CTX	ZSWIM5	Human	6.33836e-05	100
3.65321e-17	0.422443	0.14	0.036	CTX	LTBP1	Human	1.73741e-07	100
2.97497e-21	0.421319	0.207	0.066	CTX	NFAT5	Human	6.12428e-07	100
4.40517e-15	0.420654	0.208	0.088	CTX	DENND5A	Human	0.000368249	100
2.95253e-10	0.417169	0.52	0.39	CTX	ODC1	Human	0.000142423	100
1.11377e-18	0.41571	0.595	0.423	CTX	PHF14	Human	1.1194e-06	100
2.94228e-24	0.414694	0.169	0.033	CTX	HDAC4	Human	2.11024e-15	100
3.41563e-16	0.413774	0.172	0.057	CTX	TRAK1	Human	3.67491e-10	100
3.86402e-12	0.413746	0.199	0.092	CTX	SCAF8	Human	2.78751e-09	100
8.83661e-23	0.413653	0.156	0.031	CTX	DENND2A	Human	1.74099e-12	100
1.46776e-16	0.413481	0.141	0.038	CTX	DENND1B	Human	5.07936e-08	100
1.49371e-15	0.411843	0.3	0.152	CTX	KCNQ2	Human	9.19024e-07	100
2.51892e-26	0.41159	0.171	0.031	CTX	BOLA2B	Human	1.73698e-14	100
2.92689e-11	0.411059	0.342	0.213	CTX	GOLM1	Human	7.59007e-05	100
2.51185e-15	0.41029	0.177	0.065	CTX	SORBS1	Human	6.10641e-08	100
1.28395e-24	0.409499	0.167	0.031	CTX	CBLB	Human	1.61475e-12	100
7.92915e-19	0.408391	0.229	0.086	CTX	AASS	Human	2.85887e-10	100
4.45717e-26	0.408302	0.172	0.031	CTX	TRAPPC5	Human	9.25444e-21	100
9.17176e-23	0.407745	0.181	0.046	CTX	ST3GAL3	Human	6.62133e-08	100
1.20678e-16	0.406682	0.143	0.039	CTX	SHROOM3	Human	4.29391e-07	100
5.78011e-20	0.406008	0.198	0.063	CTX	DIP2B	Human	3.7591e-08	100
8.00865e-17	0.40526	0.231	0.095	CTX	RASA1	Human	1.30205e-07	100
8.85719e-21	0.405208	0.152	0.033	CTX	OPHN1	Human	1.72994e-08	100
3.58752e-19	0.404882	0.396	0.219	CTX	CTNNB1	Human	3.04964e-05	100
2.66029e-10	0.404874	0.214	0.11	CTX	KDM2A	Human	6.41556e-05	100
2.94708e-20	0.404696	0.213	0.071	CTX	BACH1	Human	4.53992e-07	100
8.33398e-21	0.402863	0.163	0.039	CTX	TRERF1	Human	2.31638e-10	100
4.14022e-13	0.40184	0.169	0.066	CTX	FBXL20	Human	6.01267e-09	100
5.08515e-09	0.39975	0.303	0.191	CTX	STAU2	Human	3.77992e-05	100
1.57304e-17	0.399557	0.294	0.14	CTX	SLC4A7	Human	6.37289e-05	100
1.88685e-14	0.399396	0.216	0.093	CTX	MEGF9	Human	4.45635e-05	100
1.00027e-15	0.398986	0.587	0.418	CTX	EIF5A	Human	2.48922e-06	100
2.22235e-13	0.397779	0.183	0.075	CTX	TNRC18	Human	8.32994e-07	100
6.64195e-23	0.397694	0.137	0.021	CTX	MCU	Human	9.39125e-13	100
9.38881e-18	0.397193	0.329	0.167	CTX	TMEM165	Human	0.000148658	100
6.83612e-12	0.396752	0.174	0.076	CTX	RGS3	Human	0.000636527	100
1.10114e-12	0.396474	0.238	0.12	CTX	GATAD2B	Human	0.000477021	100
4.84853e-14	0.396029	0.222	0.102	CTX	ERC1	Human	0.000127697	100
1.30154e-15	0.391424	0.108	0.022	CTX	GRIA1	Human	6.17197e-07	100
1.66269e-23	0.389383	0.985	0.905	CTX	YBX1	Human	3.13843e-12	100
2.16782e-32	0.389034	0.143	0.007	CTX	PDE5A	Human	8.11431e-16	100
9.4312e-11	0.387918	0.464	0.326	CTX	C1QBP	Human	0.000692515	100
1.36071e-14	0.386493	0.215	0.093	CTX	HECTD4	Human	5.58241e-05	100
2.47927e-19	0.383536	0.2	0.066	CTX	HDAC8	Human	4.11154e-06	100
3.02631e-22	0.381897	0.188	0.051	CTX	UBR3	Human	1.341e-07	100
1.64752e-16	0.379436	0.209	0.081	CTX	PPP6R2	Human	2.05198e-07	100
3.42608e-11	0.378633	0.261	0.145	CTX	HERC1	Human	5.02574e-05	100
1.0239e-18	0.378277	0.129	0.025	CTX	SLC22A23	Human	1.08025e-10	100
8.78414e-13	0.377491	0.242	0.122	CTX	RBL1	Human	0.00157833	100
1.04458e-18	0.376044	0.139	0.031	CTX	CAMK2D	Human	9.29474e-11	100
1.06176e-13	0.375597	0.14	0.045	CTX	ATG7	Human	4.38708e-11	100
5.59399e-19	0.375152	0.17	0.048	CTX	UVRAG	Human	1.07201e-08	100
1.71446e-13	0.374459	0.208	0.093	CTX	ARFGEF1	Human	5.76659e-06	100
1.06242e-15	0.374247	0.183	0.067	CTX	GPCPD1	Human	1.24079e-07	100
5.22498e-13	0.37373	0.519	0.365	CTX	NDFIP1	Human	0.000530469	100
4.83697e-14	0.373328	0.604	0.418	CTX	SRSF9	Human	4.52148e-05	100
6.90254e-19	0.372123	0.197	0.065	CTX	SEMA5B	Human	4.86564e-07	100
9.45465e-12	0.371825	0.219	0.107	CTX	TRPC4AP	Human	2.32695e-05	100
1.60226e-20	0.371636	0.194	0.057	CTX	AGPAT4	Human	3.51218e-08	100
2.98964e-13	0.371488	0.214	0.097	CTX	CMIP	Human	2.68163e-05	100
1.4998e-24	0.370779	0.171	0.035	CTX	PDSS2	Human	5.93785e-08	100
3.17026e-07	0.370121	0.303	0.209	CTX	VOPP1	Human	0.000837212	100
1.45129e-14	0.369924	0.284	0.143	CTX	ZMYM4	Human	6.29729e-05	100
1.90125e-16	0.369315	0.224	0.091	CTX	ZNF682	Human	4.25961e-07	100
1.27078e-17	0.369301	0.133	0.031	CTX	BCL2	Human	7.98953e-07	100
3.55946e-19	0.368953	0.175	0.051	CTX	GTF2IRD1	Human	8.7252e-09	100
3.58587e-20	0.368845	0.146	0.031	CTX	SIPA1L1	Human	1.52026e-07	100
9.03528e-13	0.368802	0.188	0.081	CTX	RANBP9	Human	2.57393e-06	100
5.87433e-15	0.368059	0.185	0.071	CTX	CACNG4	Human	1.65292e-07	100
3.77059e-15	0.368007	0.172	0.061	CTX	ZRANB3	Human	7.84423e-07	100
2.83012e-17	0.367599	0.143	0.036	CTX	UBE3C	Human	5.56253e-11	100
6.19382e-15	0.366152	0.225	0.097	CTX	DCBLD2	Human	1.30061e-06	100
9.69797e-18	0.364559	0.147	0.038	CTX	USP25	Human	2.20337e-08	100
1.67786e-25	0.364042	0.13	0.012	CTX	SIPA1L3	Human	7.53413e-15	100
9.45054e-15	0.361942	0.177	0.065	CTX	REEP3	Human	3.74564e-08	100
2.04942e-16	0.359106	0.168	0.053	CTX	GLCE	Human	1.75185e-07	100
3.65377e-21	0.357589	0.164	0.038	CTX	MTMR3	Human	4.0668e-12	100
6.33183e-25	0.357192	0.144	0.02	CTX	RAB11FIP3	Human	1.02492e-15	100
1.24164e-20	0.356513	0.192	0.056	CTX	PHC3	Human	1.57156e-08	100
7.26623e-14	0.354826	0.274	0.138	CTX	RLF	Human	0.000782622	100
1.83325e-09	0.354671	0.197	0.102	CTX	DYM	Human	0.000129323	100
3.71006e-13	0.353923	0.742	0.568	CTX	RCN2	Human	2.23053e-05	100
4.35126e-13	0.353856	0.274	0.146	CTX	EXOC6	Human	0.00176058	100
5.10316e-25	0.352824	0.131	0.013	CTX	STXBP5	Human	3.77648e-13	100
3.05179e-14	0.352123	0.209	0.089	CTX	ATAD2B	Human	5.88827e-06	100
6.16809e-14	0.351832	0.181	0.071	CTX	SH3RF1	Human	0.000217658	100
1.74229e-16	0.350001	0.181	0.063	CTX	EFNB2	Human	5.00688e-05	100
4.16516e-14	0.347546	0.234	0.106	CTX	ATP2C1	Human	5.78882e-05	100
4.11953e-14	0.347042	0.187	0.074	CTX	ANKRD28	Human	3.56294e-05	100
1.73544e-12	0.346815	0.175	0.073	CTX	NR2C2	Human	2.1455e-05	100
5.39999e-14	0.346269	0.229	0.106	CTX	FAR1	Human	8.92723e-05	100
6.26364e-18	0.346188	0.191	0.062	CTX	RNF111	Human	8.26895e-07	100
1.05448e-26	0.345562	0.164	0.026	CTX	HMGN4	Human	2.07128e-15	100
2.35186e-11	0.343597	0.196	0.094	CTX	LRRN1	Human	0.000166354	100
2.08992e-16	0.341183	0.199	0.073	CTX	PDXDC1	Human	1.97836e-07	100
4.04775e-20	0.341001	0.121	0.018	CTX	SHANK2	Human	3.32793e-12	100
1.73427e-19	0.340821	0.187	0.056	CTX	MON2	Human	3.9108e-07	100
1.3775e-17	0.339602	0.148	0.038	CTX	BTRC	Human	1.14413e-08	100
2.35905e-16	0.339364	0.228	0.095	CTX	STRN3	Human	0.000140198	100
6.8436e-18	0.338633	0.135	0.031	CTX	SCN8A	Human	1.40463e-11	100
8.4305e-19	0.33762	0.21	0.073	CTX	ATE1	Human	0.000548746	100
9.02398e-18	0.337459	0.76	0.558	CTX	MZT2B	Human	6.11729e-07	100
9.40705e-09	0.336455	0.178	0.093	CTX	SIMC1	Human	1.07408e-05	100
1.90297e-26	0.33548	0.142	0.016	CTX	ZNF410	Human	7.38857e-15	100
1.4413e-16	0.333771	0.189	0.067	CTX	NINL	Human	8.91816e-08	100
4.54381e-18	0.332631	0.154	0.04	CTX	GNG10	Human	2.13538e-12	100
4.81609e-19	0.332237	0.129	0.025	CTX	PEAK1	Human	1.38142e-08	100
2.49127e-19	0.330719	0.128	0.024	CTX	SPSB4	Human	5.82899e-09	100
2.94882e-19	0.328954	0.152	0.037	CTX	RECK	Human	1.69615e-09	100
4.29437e-16	0.328068	0.121	0.028	CTX	FBXL17	Human	3.66142e-06	100
5.06325e-16	0.327595	0.143	0.04	CTX	ANO10	Human	2.70327e-08	100
4.25459e-23	0.326213	0.128	0.016	CTX	CACHD1	Human	5.18075e-12	100
1.52289e-16	0.318395	0.121	0.027	CTX	INVS	Human	1.67633e-07	100
1.06084e-13	0.317422	0.164	0.059	CTX	AGO4	Human	2.76688e-07	100
9.45523e-12	0.317223	0.225	0.112	CTX	CDK13	Human	0.000746544	100
2.13149e-12	0.317062	0.114	0.033	CTX	DMD	Human	4.5759e-05	100
8.59613e-17	0.315059	0.114	0.022	CTX	FOCAD	Human	4.55327e-10	100
5.27656e-15	0.313699	0.115	0.027	CTX	VPS54	Human	1.59382e-06	100
1.38433e-22	0.313208	0.134	0.019	CTX	ADCY3	Human	7.14577e-14	100
1.55707e-14	0.312244	0.128	0.035	CTX	STK17A	Human	2.62905e-05	100
1.97479e-22	0.2931	0.141	0.023	CTX	SOGA3	Human	1.15568e-14	100
2.15645e-15	0.911499	0.338	0.205	CTX	LSAMP	Human	0.000129298	99
6.3448e-10	0.724775	0.598	0.538	CTX	CADM1	Human	0.000591839	99
8.51963e-07	0.627602	0.446	0.392	CTX	MSI2	Human	0.00129551	99
1.25744e-16	0.54301	0.202	0.08	CTX	STK33	Human	2.49899e-05	99
7.9168e-14	0.535157	0.348	0.213	CTX	GNAQ	Human	0.000393878	99
5.34255e-14	0.512332	0.344	0.211	CTX	FRYL	Human	0.000107784	99
1.37014e-18	0.485749	0.176	0.055	CTX	KIF18B	Human	0.000497217	99
2.0557e-11	0.456662	0.28	0.162	CTX	ARID2	Human	8.61227e-05	99
2.67346e-15	0.453509	0.243	0.113	CTX	NOL4	Human	4.99268e-05	99
3.77962e-11	0.433222	0.229	0.124	CTX	MLLT3	Human	0.00169816	99
2.01015e-10	0.431011	0.186	0.09	CTX	CSRNP3	Human	3.63794e-05	99
4.03381e-15	0.418729	0.327	0.184	CTX	SRM	Human	0.000285843	99
3.22847e-16	0.416516	0.282	0.135	CTX	LCOR	Human	1.16301e-06	99
4.40784e-14	0.415175	0.289	0.153	CTX	DPYSL5	Human	0.00016409	99
2.10904e-14	0.41099	0.214	0.094	CTX	DOK5	Human	0.000771134	99
7.17987e-10	0.398635	0.255	0.148	CTX	SNCAIP	Human	0.000488882	99
6.73013e-08	0.392648	0.388	0.278	CTX	KDM1A	Human	0.000288669	99
2.23132e-08	0.389032	0.425	0.311	CTX	RAD23B	Human	0.000307079	99
2.85744e-12	0.378002	0.232	0.115	CTX	EPN2	Human	0.00015887	99
5.40361e-16	0.371521	0.428	0.264	CTX	PRELID1	Human	0.000385009	99
1.70636e-18	0.370531	0.112	0.017	CTX	FRY	Human	3.16907e-12	99
5.58247e-15	0.366906	0.113	0.026	CTX	BCAS3	Human	1.18236e-10	99
1.13903e-15	0.366468	0.189	0.071	CTX	RCOR1	Human	0.000147272	99
5.95662e-13	0.362478	0.201	0.088	CTX	UBR1	Human	3.55821e-05	99
1.74386e-08	0.361426	0.208	0.115	CTX	OSBPL9	Human	0.00016549	99
3.65243e-19	0.358999	0.198	0.063	CTX	WDFY2	Human	1.09472e-07	99
1.05473e-19	0.352024	0.174	0.048	CTX	ACACA	Human	3.17962e-08	99
8.53844e-12	0.338523	0.198	0.092	CTX	PRKACB	Human	8.45703e-05	99
1.7018e-23	0.338096	0.111	0.008	CTX	PLEKHA7	Human	1.37546e-15	99
9.80931e-14	0.335172	0.229	0.107	CTX	RAP1GDS1	Human	0.00116996	99
1.03771e-22	0.334702	0.132	0.018	CTX	NLK	Human	2.47593e-12	99
1.17569e-12	0.332542	0.177	0.073	CTX	MAP2K4	Human	5.14891e-07	99
2.77315e-12	0.331013	0.846	0.699	CTX	RANBP1	Human	0.000192504	99
1.56867e-18	0.327271	0.129	0.026	CTX	ATXN7L1	Human	5.42902e-13	99
3.20994e-19	0.327246	0.133	0.027	CTX	SESN1	Human	3.32918e-10	99
1.78221e-13	0.323852	0.217	0.096	CTX	SENP5	Human	7.02936e-05	99
7.59802e-14	0.321462	0.137	0.043	CTX	ASTN1	Human	1.56515e-07	99
2.25822e-17	0.319087	0.119	0.024	CTX	ANO6	Human	1.09041e-11	99
8.8364e-24	0.316392	0.116	0.01	CTX	AMBRA1	Human	8.24737e-15	99
1.53576e-16	0.316193	0.135	0.033	CTX	BBS9	Human	1.58845e-07	99
1.65143e-16	0.315325	0.172	0.055	CTX	RALGPS1	Human	9.46553e-07	99
2.32151e-20	0.311396	0.135	0.025	CTX	KIF13A	Human	3.59437e-06	99
1.03827e-19	0.310876	0.13	0.024	CTX	SIK2	Human	2.76411e-07	99
8.82173e-16	0.310237	0.148	0.044	CTX	TRPS1	Human	0.000101753	99
1.44341e-20	0.305433	0.171	0.044	CTX	HACE1	Human	9.32112e-09	99
4.27865e-16	0.305041	0.114	0.024	CTX	SGMS1	Human	2.57336e-07	99
2.99012e-15	0.567391	0.117	0.029	CTX	KIRREL3	Human	4.242e-09	98
3.92788e-08	0.482216	0.424	0.326	CTX	FOXN3	Human	0.00105074	98
1.46295e-14	0.479442	0.614	0.482	CTX	GPM6A	Human	0.000483156	98
2.7334e-11	0.476798	0.341	0.22	CTX	ADNP	Human	0.000794991	98
2.13692e-10	0.471977	0.272	0.163	CTX	HIP1	Human	0.000628069	98
3.06334e-08	0.433372	0.327	0.224	CTX	FARP1	Human	0.000797544	98
1.0875e-09	0.42776	0.283	0.169	CTX	TLE1	Human	0.000750414	98
1.12107e-11	0.407428	0.232	0.119	CTX	UBE2H	Human	0.000970462	98
2.2083e-11	0.405975	0.217	0.111	CTX	PAM	Human	0.000847436	98
6.84616e-09	0.404593	0.148	0.071	CTX	ZNF536	Human	0.00210238	98
3.80059e-14	0.399918	0.379	0.231	CTX	DLL3	Human	0.000590839	98
7.98581e-08	0.395585	0.469	0.389	CTX	FNBP1L	Human	0.0022825	98
2.18838e-12	0.390054	0.231	0.115	CTX	PTPN4	Human	0.000362355	98
1.04771e-17	0.388066	0.406	0.221	CTX	UHRF1	Human	8.96922e-05	98
3.58519e-08	0.375114	0.224	0.132	CTX	SSBP3	Human	0.000870817	98
2.42377e-14	0.364867	0.285	0.148	CTX	UBR5	Human	0.00150001	98
1.17335e-11	0.363448	0.386	0.251	CTX	BCL7A	Human	0.000634381	98
1.3477e-18	0.36077	0.259	0.109	CTX	RALGAPA2	Human	0.000167545	98
2.0624e-13	0.357129	0.314	0.179	CTX	MARK3	Human	0.00253695	98
1.07355e-17	0.349608	0.181	0.059	CTX	FTO	Human	2.59629e-08	98
1.55266e-15	0.348791	0.246	0.112	CTX	MPDZ	Human	0.000184563	98
9.51986e-13	0.348717	0.24	0.119	CTX	UBTD2	Human	0.00029361	98
1.52912e-11	0.348685	0.196	0.091	CTX	ZC4H2	Human	4.12544e-06	98
1.06754e-11	0.34791	0.213	0.105	CTX	CCDC138	Human	0.00137641	98
1.80414e-24	0.347476	0.119	0.01	CTX	UNC79	Human	1.20313e-15	98
5.16755e-08	0.340027	0.203	0.115	CTX	JARID2	Human	0.000746406	98
9.46227e-16	0.338251	0.135	0.036	CTX	LRRC7	Human	4.29956e-06	98
6.64217e-11	0.337206	0.172	0.077	CTX	EPB41L5	Human	1.53596e-05	98
5.49967e-10	0.331261	0.24	0.133	CTX	KIAA0232	Human	0.000241773	98
2.0338e-11	0.328907	0.209	0.102	CTX	MYO9B	Human	0.000140716	98
2.5583e-15	0.328649	0.166	0.057	CTX	ATP9B	Human	6.25673e-06	98
5.34318e-16	0.325396	0.156	0.048	CTX	ZNF407	Human	1.36226e-06	98
6.38508e-15	0.323243	0.135	0.038	CTX	LZTS1	Human	4.4065e-07	98
1.73331e-11	0.322185	0.175	0.077	CTX	SLMAP	Human	3.32975e-05	98
6.12048e-14	0.318412	0.164	0.06	CTX	IRAK1BP1	Human	3.63068e-05	98
6.53464e-25	0.316471	0.102	0.002	CTX	BCL2L14	Human	1.94086e-20	98
9.7752e-14	0.315469	0.109	0.027	CTX	DTNB	Human	1.18192e-08	98
3.04938e-20	0.312467	0.116	0.016	CTX	LAMA1	Human	1.52661e-12	98
6.86877e-10	0.307357	0.212	0.11	CTX	RNGTT	Human	6.1933e-05	98
1.07766e-15	0.293889	0.139	0.038	CTX	DENND4A	Human	1.45903e-07	98
9.74669e-21	0.502325	0.118	0.016	CTX	CNTNAP2	Human	1.06441e-08	97
1.41604e-13	0.465084	0.298	0.163	CTX	DAPK1	Human	0.000982359	97
2.89032e-22	0.464441	0.116	0.012	CTX	MACROD2	Human	1.69552e-12	97
2.03396e-11	0.442848	0.365	0.238	CTX	ZMYM2	Human	0.000455298	97
2.82919e-18	0.403507	0.114	0.019	CTX	SLIT2	Human	1.65183e-09	97
8.96822e-13	0.386479	0.527	0.396	CTX	PBRM1	Human	0.00164134	97
6.20085e-09	0.377223	0.225	0.129	CTX	MBOAT2	Human	0.00197142	97
1.31489e-11	0.367584	0.229	0.117	CTX	NIN	Human	0.00118116	97
1.74532e-08	0.367144	0.501	0.377	CTX	GADD45GIP1	Human	0.00131821	97
5.87362e-09	0.35818	0.579	0.451	CTX	METTL9	Human	0.000110028	97
3.51856e-12	0.347205	0.106	0.03	CTX	GALNT14	Human	0.000150047	97
8.01886e-09	0.335242	0.18	0.094	CTX	AFAP1	Human	0.000390945	97
1.91778e-10	0.332204	0.588	0.421	CTX	NDUFB8	Human	0.00011302	97
2.50004e-12	0.327474	0.148	0.055	CTX	ASXL3	Human	0.000199712	97
1.85729e-15	0.324464	0.214	0.09	CTX	FNIP1	Human	0.000115426	97
5.73549e-16	0.315635	0.191	0.07	CTX	FAM171A1	Human	3.67314e-06	97
2.14274e-17	0.315453	0.122	0.026	CTX	CSMD2	Human	6.0351e-09	97
6.24166e-17	0.31162	0.184	0.062	CTX	RBM34	Human	2.78067e-09	97
3.36362e-13	0.301863	0.112	0.03	CTX	NOS1AP	Human	1.89974e-07	97
4.61128e-12	0.292801	0.136	0.048	CTX	LARP4B	Human	2.93687e-08	97
3.44077e-08	0.536627	0.344	0.243	CTX	DCLK2	Human	0.000985031	96
5.22833e-10	0.437018	0.412	0.282	CTX	TAGLN3	Human	0.000959398	96
3.88157e-10	0.408218	0.528	0.413	CTX	DST	Human	0.0004075	96
1.53615e-17	0.349682	0.113	0.02	CTX	BICC1	Human	2.34146e-08	96
1.97702e-11	0.34797	0.315	0.189	CTX	CCSER2	Human	0.00112371	96
6.63205e-09	0.338153	0.275	0.168	CTX	CDK2AP1	Human	0.00072016	96
1.09434e-09	0.318851	0.234	0.128	CTX	SOD2	Human	0.000778067	96
9.98333e-12	0.318674	0.199	0.093	CTX	PPP1R12B	Human	0.000144125	96
6.05656e-12	0.317036	0.241	0.124	CTX	PPM1D	Human	0.0026679	96
7.59321e-16	0.314343	0.242	0.107	CTX	RB1	Human	0.00154154	96
1.50651e-12	0.312984	0.167	0.067	CTX	EFR3B	Human	6.63381e-06	96
2.82099e-08	0.304488	0.156	0.076	CTX	TCF20	Human	3.65841e-05	96
6.24499e-17	0.302347	0.152	0.043	CTX	KANSL1L	Human	1.43693e-05	96
5.66637e-13	0.297768	0.156	0.057	CTX	STAT5B	Human	2.61611e-06	96
7.80376e-15	0.297451	0.136	0.041	CTX	FAM117B	Human	3.85585e-07	96
3.6215e-13	0.292797	0.123	0.036	CTX	KIAA1549L	Human	1.49907e-09	96
1.08883e-09	0.501312	0.258	0.152	CTX	DDIT4	Human	0.00167035	95
2.16624e-07	0.482931	0.323	0.227	CTX	BCL11B	Human	0.00116592	95
1.15999e-11	0.39451	0.256	0.142	CTX	R3HDM1	Human	0.00133133	95
3.98374e-10	0.371086	0.282	0.167	CTX	PCMTD1	Human	0.000672754	95
7.30398e-29	0.369841	0.117	0.002	CTX	DNAH11	Human	9.53196e-20	95
7.75427e-10	0.369416	0.302	0.191	CTX	RNF24	Human	0.00219716	95
1.1952e-10	0.350145	0.132	0.052	CTX	FSTL5	Human	0.000517808	95
8.11534e-10	0.326183	0.236	0.13	CTX	FAM13B	Human	0.00119468	95
8.96062e-12	0.324625	0.194	0.09	CTX	SOBP	Human	0.000549657	95
2.94483e-13	0.32456	0.238	0.115	CTX	ADAM10	Human	0.000696298	95
1.90336e-15	0.321584	0.191	0.074	CTX	CHPT1	Human	2.57688e-05	95
8.63596e-13	0.313145	0.189	0.08	CTX	XPR1	Human	6.99523e-05	95
1.1274e-11	0.312867	0.242	0.128	CTX	APBA2	Human	0.000710119	95
7.03103e-17	0.308206	0.196	0.071	CTX	TGFBR1	Human	8.82193e-06	95
2.29236e-11	0.308198	0.141	0.053	CTX	ATP11B	Human	1.7871e-06	95
2.15118e-13	0.304927	0.176	0.069	CTX	ACVR2A	Human	0.000554727	95
2.6393e-12	0.302154	0.167	0.068	CTX	PTPN13	Human	0.00109065	95
9.75077e-15	0.29967	0.162	0.055	CTX	RALGPS2	Human	3.92118e-05	95
4.8204e-10	0.297057	0.116	0.043	CTX	MXD1	Human	0.00148633	95
2.0443e-15	0.294263	0.159	0.052	CTX	STK38	Human	1.02588e-06	95
3.52741e-09	0.289724	0.129	0.053	CTX	BTD	Human	3.0838e-06	95
2.27309e-14	0.286739	0.134	0.039	CTX	RAB39A	Human	1.82527e-07	95
2.79698e-19	0.286709	0.126	0.022	CTX	KIAA0408	Human	4.51223e-12	95
4.75123e-16	0.280776	0.117	0.026	CTX	CDC14A	Human	5.09164e-09	95
5.32726e-19	0.27765	0.12	0.02	CTX	EFNA2	Human	4.41632e-12	95
8.20411e-09	0.427162	0.294	0.19	CTX	PGAP1	Human	0.00158039	94
2.19661e-19	0.415131	0.109	0.014	CTX	HECW1	Human	2.29345e-13	94
7.71468e-09	0.40048	0.205	0.113	CTX	BRIP1	Human	0.00102635	94
1.39783e-12	0.399622	0.259	0.135	CTX	ASXL1	Human	0.000747934	94
1.75049e-11	0.358201	0.35	0.22	CTX	PUM1	Human	0.00227461	94
2.08107e-11	0.356704	0.352	0.224	CTX	USP3	Human	0.0021176	94
5.20279e-12	0.356514	0.583	0.44	CTX	TERF2IP	Human	0.0010643	94
1.40121e-10	0.352888	0.237	0.131	CTX	NSMCE2	Human	0.000823673	94
1.33166e-13	0.351104	0.362	0.215	CTX	BRWD1	Human	0.00204535	94
1.60415e-16	0.347569	0.268	0.127	CTX	CUL1	Human	0.00154348	94
2.52287e-14	0.327513	0.177	0.066	CTX	SEC22A	Human	9.35037e-05	94
3.85409e-10	0.31204	0.193	0.094	CTX	AKAP13	Human	0.00105426	94
7.94074e-13	0.302132	0.185	0.077	CTX	DIABLO	Human	2.92157e-06	94
1.3501e-12	0.29679	0.174	0.07	CTX	CLIP2	Human	2.72516e-06	94
8.73409e-14	0.296185	0.102	0.023	CTX	PDE8A	Human	1.17871e-06	94
1.60375e-08	0.29377	0.174	0.089	CTX	ABL1	Human	0.000264021	94
4.8232e-18	0.293292	0.185	0.058	CTX	GBF1	Human	1.7209e-07	94
3.97917e-17	0.289676	0.17	0.052	CTX	TFCP2	Human	2.05296e-06	94
4.00395e-10	0.418389	0.332	0.216	CTX	FAM172A	Human	0.0010533	93
3.90053e-08	0.376876	0.241	0.146	CTX	PHTF2	Human	0.00152791	93
2.15037e-08	0.323017	0.184	0.097	CTX	TSPAN13	Human	0.000919004	93
3.23687e-15	0.321531	0.174	0.062	CTX	TBCK	Human	1.63129e-06	93
3.08953e-13	0.308915	0.214	0.096	CTX	PAK1	Human	0.000249139	93
9.65002e-14	0.301071	0.165	0.061	CTX	P4HA1	Human	0.000168167	93
7.7553e-18	0.28206	0.109	0.017	CTX	MAPK4	Human	7.47105e-12	93
8.66791e-24	0.268379	0.128	0.014	CTX	PCDHGC3	Human	8.82885e-16	93
9.62574e-19	0.263615	0.126	0.024	CTX	GLDC	Human	1.38083e-09	93
6.12713e-12	0.399894	0.131	0.047	CTX	MYT1L	Human	0.00328113	92
3.04735e-11	0.360261	0.323	0.198	CTX	GDAP1	Human	0.00235049	92
1.04916e-10	0.356296	0.278	0.158	CTX	TET1	Human	0.00155426	92
6.05899e-12	0.34107	0.2	0.094	CTX	GPC4	Human	0.00214019	92
6.73089e-11	0.323538	0.627	0.495	CTX	CRMP1	Human	0.00308927	92
1.37777e-18	0.319551	0.129	0.026	CTX	THSD7A	Human	5.58268e-08	92
6.34804e-12	0.307694	0.14	0.052	CTX	NCOA3	Human	0.000276584	92
2.02475e-12	0.302512	0.178	0.075	CTX	FARS2	Human	6.76045e-05	92
3.67126e-10	0.301413	0.21	0.106	CTX	ABHD17B	Human	0.000646046	92
2.46558e-16	0.296928	0.124	0.029	CTX	EIF2AK3	Human	1.00351e-07	92
1.4476e-12	0.294184	0.19	0.082	CTX	PPP2R2D	Human	0.000290898	92
2.10551e-15	0.291535	0.17	0.058	CTX	BTAF1	Human	1.25958e-07	92
6.54339e-10	0.520753	0.169	0.082	CTX	RUNX1T1	Human	0.00319315	91
7.68492e-11	0.467812	0.431	0.32	CTX	KAT6B	Human	0.0026357	91
1.48463e-11	0.351822	0.39	0.259	CTX	NOVA1	Human	0.0039132	91
1.16331e-06	0.323383	0.281	0.19	CTX	CBR4	Human	0.00138454	91
2.75626e-10	0.322492	0.464	0.325	CTX	MAP1LC3B	Human	0.0019283	91
2.59595e-09	0.300729	0.157	0.073	CTX	ANKRD13C	Human	3.24573e-05	91
2.32975e-12	0.291063	0.192	0.085	CTX	RCOR2	Human	0.000758642	91
3.16786e-15	0.288102	0.152	0.048	CTX	USP6NL	Human	2.96e-05	91
7.44288e-07	0.560574	0.162	0.092	CTX	EMX2	Human	0.00279389	90
3.10125e-08	0.445836	0.351	0.252	CTX	CUX1	Human	0.00133787	90
2.67084e-07	0.368638	0.362	0.259	CTX	NELL2	Human	0.00312694	90
1.34261e-14	0.34893	0.112	0.027	CTX	SEMA3A	Human	3.18283e-08	90
1.53048e-09	0.338106	0.512	0.387	CTX	UBA2	Human	0.00190985	90
1.88741e-10	0.337361	0.252	0.145	CTX	ZNF532	Human	0.00173594	90
7.08329e-14	0.335499	0.257	0.129	CTX	KDM5B	Human	0.00220019	90
1.35941e-09	0.326171	0.237	0.133	CTX	INSR	Human	0.00146991	90
7.17167e-07	0.315215	0.207	0.124	CTX	LRPPRC	Human	0.00274377	90
3.15192e-11	0.310842	0.183	0.082	CTX	NAV1	Human	0.00157126	90
6.99219e-07	0.305531	0.198	0.119	CTX	SPPL3	Human	0.0019103	90
1.172e-08	0.300084	0.559	0.444	CTX	TOP2B	Human	0.00343448	90
8.38474e-09	0.29572	0.191	0.1	CTX	FBXW11	Human	9.62919e-05	90
9.82101e-13	0.295432	0.19	0.08	CTX	ST8SIA2	Human	0.000210841	90
3.14589e-08	0.288556	0.167	0.086	CTX	REPS1	Human	0.00038197	90
6.18192e-13	0.288365	0.166	0.065	CTX	CROCC	Human	0.00039233	90
3.139e-09	0.287477	0.119	0.048	CTX	SORBS2	Human	0.000389929	90
4.62024e-10	0.284986	0.115	0.042	CTX	PACS1	Human	0.000677714	90
1.78684e-12	0.281439	0.117	0.035	CTX	WDR17	Human	1.41569e-05	90
8.11868e-07	0.276385	0.142	0.075	CTX	DEAF1	Human	0.000536518	90
2.35488e-19	0.268763	0.125	0.022	CTX	STRADA	Human	6.52326e-11	90
1.95611e-12	0.267562	0.148	0.055	CTX	SLC25A33	Human	0.000328127	90
3.0053e-11	0.439513	0.379	0.267	CTX	GNB1	Human	0.00224205	89
3.29913e-10	0.382799	0.437	0.321	CTX	PAFAH1B1	Human	0.00312544	89
5.633e-07	0.359938	0.324	0.226	CTX	BNIP3	Human	0.00259108	89
1.43457e-08	0.329059	0.56	0.437	CTX	RAB2A	Human	0.00119737	89
5.81728e-11	0.318769	0.149	0.059	CTX	PHLDA1	Human	0.000642916	89
7.46524e-09	0.305794	0.227	0.127	CTX	TNRC6C	Human	0.00290715	89
9.02392e-09	0.303578	0.198	0.106	CTX	SRGAP3	Human	0.00225601	89
2.10676e-07	0.303529	0.206	0.119	CTX	CORO2B	Human	0.00090974	89
4.09395e-10	0.296466	0.161	0.073	CTX	UBR2	Human	3.16938e-05	89
9.39969e-18	0.2964	0.166	0.049	CTX	FOXK2	Human	2.05682e-06	89
1.118e-16	0.29123	0.16	0.049	CTX	USP32	Human	2.44298e-08	89
1.59176e-13	0.267243	0.123	0.035	CTX	FBXL2	Human	5.93081e-06	89
1.55987e-06	0.499592	0.19	0.116	CTX	CEP112	Human	0.00363446	88
8.95347e-08	0.378368	0.281	0.186	CTX	PDS5A	Human	0.00276128	88
7.16864e-08	0.333692	0.299	0.198	CTX	TTC37	Human	0.00386228	88
2.20228e-12	0.321686	0.269	0.144	CTX	RPRD2	Human	0.00225097	88
5.5637e-10	0.320226	0.235	0.13	CTX	AGO3	Human	0.00272929	88
3.78209e-07	0.298407	0.2	0.117	CTX	SOS2	Human	0.00436466	88
2.83181e-13	0.293402	0.176	0.071	CTX	HS2ST1	Human	0.00206342	88
1.47916e-12	0.290841	0.135	0.045	CTX	ZFYVE9	Human	3.01401e-05	88
1.25886e-09	0.288215	0.187	0.094	CTX	UGGT2	Human	0.000358714	88
3.92309e-13	0.278928	0.144	0.05	CTX	CHRNA5	Human	1.45614e-06	88
7.01324e-16	0.271534	0.14	0.039	CTX	GRB10	Human	3.07447e-07	88
1.391e-11	0.397101	0.114	0.036	CTX	SH3RF3	Human	1.35963e-05	87
8.12122e-21	0.346998	0.538	0.347	CTX	PTPRZ1	Human	3.87187e-06	87
1.11805e-10	0.329234	0.225	0.119	CTX	POLA1	Human	0.0035135	87
2.89116e-09	0.327567	0.258	0.152	CTX	CDC42SE2	Human	0.00344765	87
1.2154e-09	0.318959	0.246	0.14	CTX	WDR70	Human	0.00208435	87
1.56765e-12	0.307319	0.259	0.131	CTX	ZNF518A	Human	0.000800347	87
1.76069e-10	0.292191	0.635	0.5	CTX	COX5A	Human	0.000569625	87
1.41271e-10	0.289817	0.114	0.039	CTX	AFF2	Human	0.00400078	87
3.87415e-10	0.287529	0.203	0.102	CTX	RUFY1	Human	0.00207093	87
5.80081e-18	0.283155	0.127	0.026	CTX	ADAM22	Human	4.15101e-07	87
6.38743e-20	0.276982	0.131	0.024	CTX	NEK7	Human	5.35096e-09	87
1.40325e-08	0.357107	0.272	0.174	CTX	STRBP	Human	0.00416388	86
3.23273e-07	0.294823	0.158	0.085	CTX	SIAH2	Human	0.00356157	86
2.24037e-11	0.292538	0.155	0.062	CTX	FAM135A	Human	3.7709e-06	86
5.78876e-10	0.290109	0.174	0.082	CTX	UBE4B	Human	8.15619e-05	86
2.50086e-21	0.285981	0.115	0.013	CTX	EPHA7	Human	2.88659e-11	86
9.68582e-10	0.285293	0.197	0.099	CTX	NT5C2	Human	0.000441399	86
1.55817e-14	0.436795	0.412	0.261	CTX	HMGCS1	Human	0.00535913	85
1.31278e-07	0.415684	0.157	0.083	CTX	EPHA5	Human	0.003876	85
8.18164e-12	0.356365	0.412	0.279	CTX	OSBPL8	Human	0.00398686	85
6.11139e-07	0.317671	0.323	0.228	CTX	MICU2	Human	0.00483971	85
3.94299e-09	0.313056	0.219	0.121	CTX	GNG2	Human	0.0046129	85
5.8665e-11	0.301228	0.224	0.115	CTX	IGF2BP1	Human	0.000959676	85
9.00064e-12	0.291619	0.183	0.08	CTX	MBTD1	Human	0.000372112	85
3.92254e-09	0.290666	0.193	0.099	CTX	MYO9A	Human	0.00119527	85
6.17627e-14	0.282494	0.166	0.06	CTX	STXBP4	Human	0.000135758	85
9.58869e-15	0.279798	0.128	0.034	CTX	THADA	Human	9.58432e-06	85
1.19606e-10	0.277746	0.159	0.069	CTX	STXBP1	Human	3.67611e-05	85
6.56536e-14	0.277347	0.13	0.038	CTX	CTDSPL	Human	5.80331e-06	85
4.98139e-20	0.276836	0.115	0.015	CTX	ANKS1A	Human	8.59869e-10	85
6.19267e-18	0.265504	0.106	0.015	CTX	DISP1	Human	1.14017e-08	85
2.58162e-07	0.650768	0.482	0.419	CTX	QKI	Human	0.0037203	84
5.25379e-11	0.580541	0.253	0.152	CTX	SCLT1	Human	0.00452672	84
6.90424e-09	0.422004	0.364	0.261	CTX	ASAP1	Human	0.00412884	84
6.49226e-27	0.332047	0.11	0.002	CTX	LBHD1	Human	2.49211e-20	84
1.27345e-11	0.328491	0.271	0.151	CTX	TTC17	Human	0.00603073	84
1.41906e-10	0.322057	0.201	0.102	CTX	GULP1	Human	0.00216452	84
1.1279e-08	0.316109	0.423	0.312	CTX	CPSF6	Human	0.00386372	84
6.95103e-11	0.299141	0.242	0.131	CTX	ATPAF1	Human	0.00206914	84
1.97043e-10	0.290181	0.212	0.109	CTX	UBE2Q2	Human	0.00157106	84
4.45935e-14	0.280668	0.138	0.043	CTX	ZNF438	Human	1.03673e-06	84
2.3813e-16	0.269755	0.114	0.023	CTX	SNX25	Human	1.52056e-09	84
2.13128e-09	0.387421	0.104	0.037	CTX	NCAM2	Human	0.000101956	83
4.46933e-07	0.29519	0.175	0.097	CTX	MBNL1	Human	0.00234099	83
1.04544e-10	0.291068	0.127	0.047	CTX	CUX2	Human	0.00185532	83
1.07052e-10	0.283978	0.145	0.058	CTX	CPLX2	Human	2.66321e-05	83
3.34888e-10	0.275086	0.14	0.057	CTX	FOXN2	Human	0.000183992	83
2.02328e-13	0.271901	0.111	0.029	CTX	ATP11A	Human	1.56126e-07	83
8.12008e-14	0.271365	0.171	0.063	CTX	MYO5A	Human	0.000239182	83
2.39333e-07	0.408465	0.228	0.138	CTX	ZFHX3	Human	0.00226356	82
1.58779e-10	0.32157	0.391	0.256	CTX	PNMA1	Human	0.00503149	82
8.63011e-11	0.294717	0.185	0.086	CTX	PPP3CB	Human	5.70363e-05	82
5.07837e-16	0.280267	0.103	0.018	CTX	TTC39C	Human	7.38338e-10	82
1.66913e-13	0.27764	0.136	0.043	CTX	ZNF516	Human	2.59886e-10	82
4.05236e-11	0.277324	0.186	0.085	CTX	GCFC2	Human	0.00143845	82
3.10958e-11	0.272034	0.116	0.038	CTX	WIPF3	Human	0.000340146	82
1.63914e-14	0.271555	0.117	0.03	CTX	CDC14B	Human	1.25553e-05	82
1.73277e-22	0.266077	0.118	0.012	CTX	TRPC1	Human	5.31254e-11	82
1.05447e-09	0.391936	0.431	0.314	CTX	HMGA1	Human	0.00462186	81
1.98629e-11	0.284717	0.199	0.094	CTX	CBFB	Human	9.15206e-05	81
3.20962e-18	0.279105	0.108	0.016	CTX	ZNRF2	Human	1.84315e-08	81
4.19978e-10	0.273668	0.148	0.063	CTX	TMEM131	Human	0.000228075	81
2.25334e-09	0.362397	0.438	0.305	CTX	MSMO1	Human	0.00453843	80
1.4082e-10	0.330451	0.219	0.114	CTX	FOXP1	Human	0.00364606	80
1.36197e-09	0.326656	0.38	0.257	CTX	KLC1	Human	0.00383772	80
9.90738e-12	0.323448	0.237	0.123	CTX	E2F1	Human	0.00297631	80
3.30032e-08	0.29103	0.214	0.123	CTX	KLHL28	Human	9.435e-05	80
1.40734e-07	0.28852	0.206	0.121	CTX	UBL3	Human	0.0015628	80
5.02098e-11	0.287777	0.163	0.07	CTX	IGDCC3	Human	0.000343654	80
9.89308e-09	0.281939	0.227	0.128	CTX	SS18	Human	0.000692497	80
4.08572e-17	0.281658	0.173	0.055	CTX	PDE9A	Human	2.07767e-05	80
2.94617e-12	0.274195	0.129	0.043	CTX	XPO4	Human	1.27416e-05	80
9.37817e-16	0.270711	0.156	0.048	CTX	MOB1B	Human	7.28766e-06	80
5.73475e-18	0.268314	0.128	0.027	CTX	ZXDC	Human	1.40836e-09	80
7.5259e-14	0.267608	0.142	0.046	CTX	SH3PXD2B	Human	4.84348e-08	80
1.52323e-18	0.261418	0.152	0.038	CTX	FAM120B	Human	1.33344e-08	80
3.08164e-07	0.458033	0.426	0.344	CTX	BCL11A	Human	0.00460968	79
9.36454e-07	0.418583	0.147	0.081	CTX	CHL1	Human	0.0054659	79
3.72973e-08	0.332089	0.608	0.526	CTX	CAMTA1	Human	0.00598452	79
8.58346e-11	0.30248	0.237	0.13	CTX	MAPRE2	Human	0.00276261	79
7.47167e-11	0.283374	0.617	0.47	CTX	YWHAH	Human	0.00164777	79
2.59543e-10	0.280157	0.143	0.059	CTX	CCDC88C	Human	0.000231823	79
8.28004e-17	0.257688	0.117	0.024	CTX	WDR37	Human	4.65849e-12	79
3.73019e-10	0.794409	0.443	0.371	CTX	MPPED2	Human	0.00516388	78
3.65763e-11	0.343257	0.366	0.24	CTX	FBXL5	Human	0.00522598	78
1.05155e-16	0.330904	0.106	0.018	CTX	PLCL1	Human	6.7515e-10	78
2.33552e-10	0.320235	0.382	0.249	CTX	NDN	Human	0.00338549	78
5.54057e-09	0.304147	0.225	0.128	CTX	TLK1	Human	0.00383166	78
1.03728e-06	0.289773	0.112	0.052	CTX	DGKB	Human	0.00391214	78
4.97154e-07	0.286115	0.237	0.147	CTX	TULP4	Human	0.00399242	78
2.28009e-10	0.278021	0.208	0.103	CTX	UBE2W	Human	0.000300071	78
1.38623e-12	0.276708	0.16	0.062	CTX	EGLN1	Human	0.000363117	78
8.00906e-11	0.271704	0.159	0.068	CTX	HERC4	Human	0.000598066	78
1.40907e-12	0.264158	0.153	0.057	CTX	LRBA	Human	3.29913e-05	78
3.76172e-12	0.499733	0.251	0.139	CTX	ST8SIA5	Human	0.00478075	77
5.49479e-15	0.272314	0.178	0.066	CTX	ZNF827	Human	0.000133887	77
1.73721e-13	0.267298	0.134	0.042	CTX	GPR137B	Human	3.97626e-08	77
7.93482e-11	0.472996	0.365	0.262	CTX	ARHGAP21	Human	0.00650038	76
2.1493e-07	0.363452	0.109	0.049	CTX	MAML2	Human	0.00601083	76
2.45482e-09	0.354494	0.345	0.225	CTX	KLHL7	Human	0.00220494	76
4.27303e-07	0.298657	0.228	0.141	CTX	MCPH1	Human	0.00464382	76
1.82095e-11	0.290418	0.274	0.151	CTX	BRI3	Human	0.00276417	76
1.08001e-07	0.286546	0.18	0.098	CTX	CDK17	Human	0.00178867	76
1.68399e-09	0.286267	0.161	0.075	CTX	ELOVL6	Human	0.0010288	76
9.65592e-10	0.284727	0.176	0.085	CTX	ARNT2	Human	0.000475489	76
2.07125e-13	0.274344	0.141	0.047	CTX	MAN2A1	Human	5.52616e-07	76
2.04083e-16	0.272285	0.107	0.019	CTX	RELL1	Human	5.65978e-11	76
1.66834e-06	0.312872	0.279	0.192	CTX	USP34	Human	0.00493592	75
1.67132e-12	0.28614	0.241	0.121	CTX	COMMD10	Human	0.0047617	75
6.48002e-09	0.281517	0.175	0.089	CTX	SMAD9	Human	0.00164037	75
7.60137e-09	0.281479	0.25	0.148	CTX	USP15	Human	0.00200716	75
1.12626e-20	0.279375	0.226	0.074	CTX	RSRP1	Human	2.42292e-06	75
9.49229e-13	0.269661	0.113	0.031	CTX	RGL1	Human	5.05443e-07	75
1.41755e-24	0.561836	0.108	0.005	CTX	NKAIN2	Human	5.55744e-17	74
1.73797e-08	0.401635	0.406	0.31	CTX	SRPK2	Human	0.00441446	74
6.32845e-09	0.353665	0.24	0.139	CTX	FAM110B	Human	0.00393772	74
1.46935e-09	0.34459	0.425	0.312	CTX	TAF15	Human	0.00568806	74
6.04458e-09	0.323714	0.506	0.389	CTX	NCOR1	Human	0.00431575	74
6.77094e-09	0.321233	0.154	0.074	CTX	NTN4	Human	0.00357378	74
2.99552e-12	0.312245	0.286	0.156	CTX	PCBP4	Human	0.0047061	74
8.70099e-10	0.279054	0.193	0.097	CTX	RABGAP1	Human	0.00117138	74
3.85224e-09	0.27708	0.176	0.087	CTX	PLEKHA8	Human	0.000811257	74
2.31618e-15	0.264798	0.148	0.045	CTX	TBC1D22A	Human	2.48392e-06	74
4.72258e-17	0.263565	0.177	0.057	CTX	DENND6A	Human	7.08808e-05	74
1.52051e-07	0.615477	0.301	0.223	CTX	DIAPH3	Human	0.00517164	73
5.84076e-11	0.293247	0.181	0.084	CTX	ACYP2	Human	0.00173497	73
1.31469e-08	0.280697	0.15	0.072	CTX	SLC25A13	Human	0.000951223	73
1.29419e-10	0.323173	0.139	0.057	CTX	NEGR1	Human	0.00617327	72
2.10178e-06	0.306717	0.28	0.19	CTX	PALLD	Human	0.0044414	72
7.27538e-12	0.275827	0.216	0.104	CTX	DCUN1D4	Human	0.00120386	72
9.37366e-13	0.261864	0.151	0.055	CTX	LMBR1	Human	3.58995e-05	72
5.36555e-09	0.322399	0.181	0.094	CTX	COL11A1	Human	0.00417948	71
3.84721e-08	0.306009	0.304	0.2	CTX	ITSN1	Human	0.00478693	71
7.04234e-07	0.295783	0.283	0.187	CTX	GLG1	Human	0.00677982	71
2.92243e-06	0.286951	0.249	0.165	CTX	LRP6	Human	0.00470774	71
1.39167e-14	0.269323	0.16	0.054	CTX	SPTLC1	Human	2.53851e-07	71
1.32937e-11	0.267363	0.128	0.044	CTX	PHACTR3	Human	7.87823e-07	71
2.73633e-17	0.251015	0.143	0.036	CTX	AUH	Human	3.8623e-08	71
2.69923e-21	0.353618	0.102	0.008	CTX	CDH4	Human	4.73633e-13	70
3.84038e-10	0.320407	0.411	0.284	CTX	PAIP1	Human	0.00726002	70
3.93733e-12	0.287154	0.195	0.089	CTX	ARHGEF12	Human	0.00321803	70
1.5309e-08	0.275941	0.191	0.103	CTX	RNF169	Human	0.00307356	70
9.28453e-12	0.267626	0.194	0.088	CTX	GFPT1	Human	0.001	70
8.28268e-08	0.409794	0.375	0.288	CTX	RFC3	Human	0.00484962	69
1.66279e-08	0.331809	0.365	0.255	CTX	ZNF148	Human	0.00816386	69
1.14277e-08	0.298887	0.301	0.195	CTX	TAOK1	Human	0.00377163	69
1.15354e-07	0.282613	0.197	0.113	CTX	CEP85L	Human	0.00101912	69
9.67819e-08	0.275034	0.115	0.051	CTX	SEL1L3	Human	0.00163125	69
7.1402e-08	0.271652	0.217	0.126	CTX	DCAF10	Human	0.00524303	69
1.40434e-12	0.268345	0.143	0.051	CTX	ZNF345	Human	0.000116953	69
2.69493e-14	0.266776	0.1	0.021	CTX	PLCH1	Human	2.83436e-07	69
4.51287e-17	0.258861	0.146	0.038	CTX	ZNF124	Human	2.94673e-08	69
1.2509e-06	0.36832	0.202	0.125	CTX	MYO3A	Human	0.00542929	68
1.34276e-09	0.306941	0.296	0.179	CTX	LAPTM4B	Human	0.00538811	68
2.54752e-08	0.292973	0.299	0.192	CTX	PODXL2	Human	0.0052951	68
1.29194e-17	0.280978	0.104	0.015	CTX	ST6GAL1	Human	6.7304e-09	68
4.56127e-13	0.269783	0.151	0.053	CTX	MRPL53	Human	1.11102e-06	68
2.05774e-06	0.992563	0.505	0.465	CTX	NFIA	Human	0.0065272	67
6.80246e-10	0.347892	0.212	0.115	CTX	CAMK4	Human	0.00766884	67
1.2632e-08	0.325736	0.429	0.314	CTX	NME4	Human	0.00752241	67
6.4158e-10	0.300109	0.284	0.172	CTX	ZMIZ1	Human	0.00690444	67
3.35756e-20	0.279964	0.102	0.01	CTX	SMURF1	Human	1.07504e-10	67
1.04804e-14	0.276228	0.177	0.064	CTX	STARD9	Human	4.87077e-05	67
5.80369e-10	0.271724	0.241	0.133	CTX	XRN1	Human	0.00363537	67
5.10762e-13	0.258067	0.132	0.042	CTX	PIP4K2A	Human	1.95411e-06	67
3.53848e-20	0.252279	0.113	0.014	CTX	WBP1	Human	1.16345e-12	67
5.80971e-08	0.334275	0.302	0.203	CTX	ZNF462	Human	0.00716273	66
1.79646e-06	0.327939	0.525	0.423	CTX	ATP1B3	Human	0.00566167	66
2.51292e-10	0.295043	0.274	0.16	CTX	PRDM2	Human	0.0032958	66
2.38197e-09	0.285166	0.212	0.114	CTX	SMURF2	Human	0.0011685	66
3.44222e-11	0.269367	0.159	0.068	CTX	AGFG1	Human	1.11392e-05	66
9.78511e-11	0.266567	0.216	0.108	CTX	LRCH3	Human	0.00166292	66
2.22917e-08	0.264516	0.193	0.104	CTX	LIN52	Human	0.00348345	66
2.29369e-12	0.264211	0.192	0.084	CTX	AP3B1	Human	0.000563928	66
2.27653e-08	0.295904	0.283	0.177	CTX	TRIM44	Human	0.00704676	65
1.5573e-08	0.28805	0.184	0.099	CTX	UTRN	Human	0.00424097	65
6.1402e-15	0.268268	0.164	0.056	CTX	BCL9	Human	6.86719e-05	65
8.75412e-15	0.261082	0.143	0.044	CTX	NEO1	Human	3.31745e-06	65
1.71553e-16	0.260853	0.149	0.042	CTX	USP24	Human	1.99332e-07	65
1.50771e-09	0.36954	0.338	0.229	CTX	EVL	Human	0.00688314	64
7.25989e-08	0.310553	0.249	0.153	CTX	CXADR	Human	0.0061665	64
3.82486e-10	0.304418	0.459	0.327	CTX	WTAP	Human	0.00402278	64
6.48952e-07	0.291173	0.21	0.131	CTX	FAM13A	Human	0.00678399	64
1.2107e-08	0.280824	0.236	0.135	CTX	UHRF2	Human	0.00400202	64
2.00381e-07	0.27397	0.198	0.115	CTX	CRY1	Human	0.00393977	64
3.04576e-11	0.268665	0.175	0.078	CTX	TM7SF3	Human	0.000544178	64
3.80314e-11	0.265828	0.157	0.065	CTX	ORC2	Human	0.000184313	64
1.67349e-10	0.26454	0.188	0.091	CTX	CAB39	Human	0.000891254	64
7.56039e-14	0.263709	0.135	0.041	CTX	ATP8A1	Human	2.45798e-07	64
3.75519e-08	0.263239	0.23	0.134	CTX	KDM2B	Human	0.00049321	64
5.57463e-08	0.262106	0.198	0.11	CTX	LRRFIP2	Human	0.00224964	64
1.47022e-17	0.259144	0.112	0.019	CTX	ESYT2	Human	1.43968e-07	64
1.12123e-10	0.408813	0.212	0.11	CTX	MSRA	Human	0.00666749	63
3.44786e-08	0.378747	0.258	0.164	CTX	MID1	Human	0.00645083	63
7.96265e-13	0.27818	0.198	0.089	CTX	PHYKPL	Human	0.00450983	63
2.49138e-12	0.268772	0.176	0.073	CTX	TTLL5	Human	0.000546138	63
3.29204e-15	0.265571	0.155	0.05	CTX	DOCK11	Human	1.03867e-05	63
1.36038e-15	0.259046	0.156	0.049	CTX	KDM4B	Human	6.58766e-05	63
1.5249e-17	0.252034	0.115	0.021	CTX	MKRN3	Human	2.41331e-11	63
1.13267e-08	0.322235	0.344	0.231	CTX	BAG1	Human	0.00796538	62
3.04481e-16	0.296379	0.109	0.021	CTX	CAMKMT	Human	1.65312e-07	62
4.70243e-08	0.283964	0.359	0.251	CTX	CHD6	Human	0.0062922	62
3.54571e-08	0.282022	0.254	0.156	CTX	RABEP1	Human	0.00495663	62
2.03282e-12	0.27714	0.245	0.124	CTX	SMAD2	Human	0.00243206	62
6.272e-14	0.264372	0.16	0.057	CTX	IFT80	Human	6.91706e-05	62
2.30278e-11	0.263465	0.201	0.096	CTX	GPBP1L1	Human	0.000340128	62
1.54562e-14	0.261314	0.106	0.023	CTX	HIVEP2	Human	3.3899e-08	62
1.80898e-16	0.254492	0.138	0.036	CTX	FCHO2	Human	6.74952e-06	62
2.46379e-06	0.37541	0.344	0.26	CTX	PHACTR4	Human	0.00729621	61
1.61109e-08	0.303732	0.199	0.11	CTX	PPP1R9A	Human	0.00767903	61
7.34144e-09	0.29264	0.323	0.209	CTX	SENP6	Human	0.00595972	61
2.20067e-14	0.259855	0.131	0.037	CTX	MAP2K5	Human	9.08751e-07	61
1.56859e-09	0.257449	0.174	0.085	CTX	BRWD3	Human	3.45402e-06	61
5.51112e-18	0.254889	0.111	0.018	CTX	TMEM178A	Human	2.42289e-10	61
5.18782e-08	0.312466	0.281	0.177	CTX	PPM1B	Human	0.00568342	60
2.2855e-07	0.290864	0.294	0.195	CTX	YPEL1	Human	0.00967522	60
8.60789e-09	0.274496	0.478	0.346	CTX	SNRPN	Human	0.00486608	60
4.76288e-21	0.27079	0.101	0.008	CTX	KIF7	Human	1.91169e-13	60
1.35052e-09	0.270382	0.242	0.135	CTX	CTTN	Human	0.0025836	60
1.58748e-15	0.259985	0.156	0.05	CTX	MAP3K4	Human	0.000467137	60
9.63854e-09	0.252817	0.157	0.076	CTX	PRKAR2B	Human	0.00177725	60
6.45913e-10	0.464516	0.261	0.156	CTX	RIC3	Human	0.00491131	59
3.33845e-07	0.348965	0.369	0.273	CTX	ESF1	Human	0.0074324	59
2.63785e-09	0.294937	0.28	0.173	CTX	SENP7	Human	0.00567375	59
3.05408e-10	0.288875	0.358	0.232	CTX	SIAH1	Human	0.00237235	59
5.00524e-18	0.278581	0.117	0.021	CTX	RNF150	Human	3.27607e-10	59
8.3854e-11	0.275926	0.205	0.102	CTX	SMG6	Human	0.000660915	59
8.72042e-08	0.272657	0.156	0.08	CTX	USPL1	Human	0.000722989	59
9.21904e-07	0.270008	0.255	0.167	CTX	SFXN1	Human	0.00432116	59
2.32914e-07	0.265233	0.228	0.138	CTX	RALGAPA1	Human	0.00480668	59
3.44989e-07	0.259314	0.157	0.085	CTX	GAB1	Human	0.00126801	59
1.50297e-12	0.254678	0.115	0.033	CTX	CNKSR2	Human	6.03004e-08	59
4.55603e-10	0.28183	0.217	0.115	CTX	STOX2	Human	0.00542303	58
3.06148e-10	0.264826	0.196	0.096	CTX	POLE2	Human	0.000119093	58
5.89733e-08	0.263028	0.177	0.095	CTX	CLVS2	Human	0.00741025	58
1.45297e-15	0.260466	0.159	0.052	CTX	RNF144A	Human	1.15403e-06	58
8.84908e-07	0.260248	0.241	0.154	CTX	TP53BP1	Human	0.0018513	58
3.54218e-11	0.257774	0.127	0.045	CTX	SEC24B	Human	2.89151e-07	58
4.78568e-10	0.256029	0.127	0.05	CTX	HIBADH	Human	2.78503e-05	58
4.69382e-10	0.468181	0.568	0.514	CTX	CDH2	Human	0.00683432	57
5.72872e-07	0.30857	0.217	0.138	CTX	PGRMC2	Human	0.0079709	57
1.44275e-11	0.263497	0.137	0.051	CTX	NUBPL	Human	0.000187243	57
3.47076e-18	0.257421	0.164	0.047	CTX	C2CD5	Human	2.91052e-05	57
5.99263e-13	0.256667	0.175	0.07	CTX	TRPM7	Human	9.98282e-06	57
3.74693e-07	0.366704	0.484	0.393	CTX	IDI1	Human	0.00692877	56
3.15016e-08	0.308962	0.323	0.22	CTX	USP33	Human	0.00919979	56
1.45296e-10	0.269311	0.156	0.068	CTX	ICE1	Human	0.00223847	56
1.6055e-10	0.268404	0.207	0.102	CTX	PIK3C2A	Human	0.00101786	56
1.1539e-07	0.336587	0.311	0.217	CTX	PIAS1	Human	0.0101714	55
4.22434e-07	0.308713	0.335	0.237	CTX	VEZT	Human	0.00488882	55
1.78805e-06	0.308701	0.277	0.191	CTX	KAT6A	Human	0.00854854	55
3.76726e-09	0.305233	0.223	0.128	CTX	SRGAP2	Human	0.00746476	55
2.70309e-09	0.300307	0.199	0.107	CTX	RNF139	Human	0.00788867	55
1.98695e-06	0.293344	0.513	0.426	CTX	ATXN10	Human	0.00865904	55
1.91756e-11	0.283535	0.296	0.173	CTX	CUL5	Human	0.00672002	55
5.91302e-09	0.274733	0.23	0.132	CTX	RAB3GAP1	Human	0.00208293	55
5.27196e-09	0.273657	0.228	0.129	CTX	NSUN6	Human	0.00312997	55
3.95936e-09	0.269628	0.515	0.37	CTX	KRT10	Human	0.00789144	55
6.17164e-14	0.254014	0.141	0.045	CTX	ADAM9	Human	4.2116e-06	55
1.14402e-17	0.250801	0.125	0.026	CTX	RTTN	Human	1.18722e-09	55
2.04248e-16	0.246435	0.123	0.028	CTX	TTC7B	Human	2.61423e-11	55
5.08548e-08	0.33786	0.248	0.152	CTX	LMO1	Human	0.00621491	54
1.91272e-10	0.28233	0.16	0.071	CTX	ZNF367	Human	0.0078234	54
8.38025e-09	0.27247	0.279	0.171	CTX	CUL3	Human	0.00559155	54
7.50137e-20	0.254187	0.127	0.022	CTX	PCBP3	Human	1.0296e-06	54
8.8458e-20	0.247628	0.125	0.021	CTX	ARHGEF11	Human	6.03563e-11	54
1.85394e-07	0.29666	0.231	0.142	CTX	SNAP25	Human	0.0103017	53
1.3002e-07	0.269608	0.257	0.165	CTX	ASPH	Human	0.00673898	53
1.53792e-07	0.256547	0.217	0.127	CTX	PTPN12	Human	0.00566884	53
3.81152e-10	0.382991	0.392	0.262	CTX	FABP7	Human	0.00789179	52
4.6652e-10	0.287763	0.102	0.033	CTX	ANGPT2	Human	0.00278908	52
1.76823e-07	0.272747	0.214	0.128	CTX	FAM50A	Human	0.00983391	52
2.77838e-11	0.257088	0.252	0.135	CTX	MED13	Human	0.000616589	52
8.02897e-15	0.29889	0.105	0.022	CTX	PPP2R2B	Human	1.91184e-05	51
6.79052e-08	0.280845	0.238	0.146	CTX	JAK1	Human	0.00660528	51
4.12655e-12	0.265585	0.217	0.102	CTX	ALKBH5	Human	0.00300844	51
8.49751e-13	0.254736	0.12	0.035	CTX	CYTH1	Human	1.1206e-06	51
9.37893e-07	0.304368	0.398	0.298	CTX	CAPRIN1	Human	0.0085124	50
2.01579e-06	0.261681	0.18	0.108	CTX	TTBK2	Human	0.00067603	50
7.20645e-10	0.261635	0.166	0.078	CTX	POLQ	Human	0.00232656	50
1.39313e-07	0.254862	0.111	0.049	CTX	DNM3	Human	0.00155755	50
1.54296e-10	0.25287	0.115	0.04	CTX	SPRED1	Human	1.2097e-06	50
3.97418e-09	0.245059	0.119	0.048	CTX	CYSTM1	Human	0.000493582	50
2.97586e-07	0.352095	0.411	0.323	CTX	PPP2R5E	Human	0.00921672	49
1.04593e-24	0.303691	0.106	0.004	CTX	MAK	Human	1.1438e-19	49
1.42972e-22	0.298531	0.105	0.007	CTX	NR6A1	Human	4.38667e-16	49
4.27084e-07	0.274958	0.358	0.264	CTX	CMPK1	Human	0.00613003	49
4.5732e-08	0.268444	0.1	0.039	CTX	JAZF1	Human	0.00089696	49
3.80064e-07	0.264868	0.167	0.093	CTX	PDHX	Human	0.00104263	49
1.08126e-08	0.277596	0.199	0.108	CTX	ITGB8	Human	0.00144493	48
3.98105e-15	0.271966	0.172	0.061	CTX	ANGPTL1	Human	0.000662939	48
1.66229e-12	0.256847	0.135	0.046	CTX	STRN	Human	3.41033e-06	48
3.45513e-10	0.256301	0.172	0.079	CTX	MAP2K1	Human	0.000913234	48
4.65501e-07	0.71211	0.206	0.129	CTX	FOXP2	Human	0.0104796	47
8.41971e-07	0.28626	0.482	0.373	CTX	UBE3A	Human	0.00577491	47
1.96739e-06	0.283612	0.265	0.177	CTX	ZNF821	Human	0.00956274	47
4.06573e-08	0.273615	0.253	0.155	CTX	SLC36A4	Human	0.00640439	47
3.08379e-09	0.270436	0.223	0.122	CTX	E2F3	Human	0.00435327	47
1.11242e-08	0.252985	0.143	0.067	CTX	NARS2	Human	0.00239746	47
8.97233e-07	0.562704	0.121	0.062	CTX	GRID2	Human	0.00688082	46
6.65654e-10	0.300084	0.403	0.281	CTX	UBE2E1	Human	0.00611214	46
7.49546e-07	0.287953	0.371	0.275	CTX	PRRC2B	Human	0.0130282	46
1.29816e-07	0.282093	0.514	0.416	CTX	LSM14A	Human	0.0108891	46
1.20742e-08	0.264931	0.232	0.135	CTX	ME2	Human	0.00190194	46
3.51014e-07	0.279644	0.401	0.291	CTX	HES4	Human	0.00118166	45
2.70094e-08	0.278262	0.366	0.255	CTX	GSPT1	Human	0.00543131	45
8.37932e-08	0.269208	0.191	0.108	CTX	MPP6	Human	0.00320546	45
4.17277e-07	0.266867	0.246	0.155	CTX	RICTOR	Human	0.00610627	45
1.33798e-13	0.265815	0.162	0.06	CTX	KLHDC10	Human	0.00212458	45
1.11152e-11	0.256648	0.22	0.107	CTX	EPHB2	Human	0.000993606	45
2.53496e-17	0.254356	0.118	0.023	CTX	WNK2	Human	6.56791e-08	45
6.91667e-12	0.253439	0.134	0.047	CTX	DPY19L3	Human	5.45154e-06	45
1.37487e-20	0.244814	0.104	0.01	CTX	RIC1	Human	3.45921e-13	45
6.40656e-08	0.281058	0.271	0.171	CTX	CFAP97	Human	0.0040337	44
9.56069e-11	0.277048	0.248	0.137	CTX	ID4	Human	0.00150221	44
6.78047e-09	0.254972	0.123	0.052	CTX	NLN	Human	0.000413065	44
3.0315e-07	0.352641	0.394	0.303	CTX	RBM6	Human	0.00763506	43
3.41482e-07	0.318467	0.334	0.233	CTX	SLBP	Human	0.0104459	43
7.32539e-10	0.271804	0.257	0.145	CTX	MYDGF	Human	0.00640137	43
3.93379e-10	0.270601	0.259	0.149	CTX	ROCK2	Human	0.00507058	43
6.1644e-13	0.257219	0.193	0.082	CTX	FAM193A	Human	0.000187863	43
1.9132e-08	0.251342	0.153	0.075	CTX	TRAPPC12	Human	0.00207768	43
5.24612e-20	0.250491	0.146	0.031	CTX	MAST1	Human	3.64115e-08	43
2.33245e-07	0.325281	0.153	0.082	CTX	FLRT2	Human	0.00656433	42
5.29493e-08	0.28834	0.28	0.18	CTX	TUSC3	Human	0.00587098	42
6.98221e-10	0.27842	0.385	0.258	CTX	RAB4A	Human	0.012524	42
2.30135e-08	0.274949	0.61	0.491	CTX	HNRNPAB	Human	0.00932855	42
2.15013e-08	0.257932	0.21	0.118	CTX	RRP1B	Human	0.00454338	42
1.45102e-15	0.255346	0.134	0.035	CTX	EXTL3	Human	1.52991e-07	42
2.19358e-12	0.254071	0.142	0.052	CTX	VPS8	Human	0.000204575	42
1.20202e-10	0.252978	0.115	0.04	CTX	MBNL2	Human	6.25008e-05	42
2.36898e-11	0.252206	0.157	0.065	CTX	DMXL1	Human	6.07683e-05	42
3.27246e-13	0.249999	0.114	0.031	CTX	HFM1	Human	1.48114e-06	42
1.49904e-08	0.313439	0.333	0.221	CTX	UBE2K	Human	0.00678564	41
1.7504e-07	0.295469	0.306	0.206	CTX	MSI1	Human	0.00526582	41
5.54392e-07	0.263777	0.222	0.137	CTX	FSD1L	Human	0.00424371	41
2.05412e-11	0.260671	0.221	0.107	CTX	ZNF84	Human	0.0046191	41
1.1928e-08	0.257553	0.175	0.089	CTX	ZPR1	Human	0.00348114	41
8.61768e-20	0.395062	0.1	0.01	CTX	LDLRAD4	Human	1.31414e-09	40
5.61543e-08	0.325936	0.3	0.196	CTX	BEX2	Human	0.00819705	40
3.60891e-17	0.281007	0.1	0.014	CTX	ARSB	Human	2.36913e-11	40
1.2336e-09	0.261707	0.261	0.152	CTX	RAB28	Human	0.00465995	40
8.57907e-08	0.257604	0.18	0.098	CTX	MAPKAP1	Human	0.00279034	40
1.23069e-11	0.255877	0.172	0.074	CTX	FBXO34	Human	0.000610276	40
2.21164e-12	0.250505	0.135	0.046	CTX	AKNAD1	Human	1.79137e-05	40
2.02125e-13	0.25025	0.131	0.04	CTX	BCKDHB	Human	1.89913e-06	40
3.14058e-07	0.418931	0.438	0.349	CTX	ELF2	Human	0.00886173	39
2.45904e-13	0.288942	0.101	0.024	CTX	SLC4A4	Human	1.06464e-05	39
2.77356e-08	0.280211	0.315	0.204	CTX	GSE1	Human	0.00562656	39
2.3581e-09	0.278061	0.62	0.473	CTX	CLTA	Human	0.00685305	39
1.45347e-09	0.275592	0.103	0.036	CTX	PRKCE	Human	6.6057e-07	39
5.11855e-07	0.265883	0.199	0.118	CTX	ALMS1	Human	0.0072692	39
3.48058e-13	0.251422	0.118	0.033	CTX	ATR	Human	6.93897e-06	39
6.46502e-15	0.248432	0.144	0.044	CTX	MSANTD2	Human	4.52404e-08	39
5.64923e-23	0.453219	0.106	0.007	CTX	CLVS1	Human	1.22149e-17	38
7.56324e-08	0.289532	0.308	0.202	CTX	VGLL4	Human	0.00755618	38
1.13901e-07	0.263204	0.222	0.132	CTX	GNAI1	Human	0.0120997	38
1.58505e-08	0.263185	0.198	0.107	CTX	OXSR1	Human	0.00283525	38
2.00386e-15	0.262809	0.168	0.057	CTX	MFSD11	Human	0.00367812	38
1.97883e-07	0.256783	0.18	0.101	CTX	KPNA1	Human	0.000895344	38
1.18822e-08	0.253097	0.121	0.052	CTX	BOP1	Human	7.41026e-05	38
4.60004e-10	0.252764	0.17	0.078	CTX	GSTCD	Human	1.57069e-05	38
1.38322e-09	0.251731	0.167	0.077	CTX	FNBP1	Human	0.00262148	38
4.1588e-12	0.25112	0.151	0.057	CTX	TBC1D16	Human	0.00101685	38
4.01038e-07	0.250489	0.19	0.11	CTX	KATNAL1	Human	0.000522911	38
4.99064e-15	0.244717	0.111	0.025	CTX	RRAS2	Human	9.96382e-08	38
1.34778e-06	0.335313	0.531	0.418	CTX	PNRC1	Human	0.00954274	37
1.09572e-07	0.280182	0.249	0.154	CTX	TJP1	Human	0.0105559	37
1.28286e-08	0.263478	0.103	0.039	CTX	CTTNBP2	Human	0.000378344	37
7.4228e-11	0.254867	0.189	0.09	CTX	EPC2	Human	0.00124554	37
3.72117e-10	0.253271	0.144	0.06	CTX	REEP1	Human	0.00432796	37
1.98383e-09	0.252926	0.112	0.042	CTX	SLC1A2	Human	3.62008e-05	37
2.00747e-09	0.252422	0.196	0.1	CTX	CASD1	Human	0.00541429	37
2.64491e-14	0.251204	0.137	0.042	CTX	TRRAP	Human	8.14802e-08	37
8.70374e-08	0.249237	0.99	0.884	CTX	FTH1	Human	0.00201253	37
1.47626e-19	0.244719	0.102	0.01	CTX	CLEC16A	Human	1.0917e-08	37
7.79329e-07	0.364248	0.327	0.229	CTX	DLL1	Human	0.0095815	36
1.05528e-11	0.274726	0.1	0.028	CTX	EPB41L3	Human	5.1885e-07	36
8.28905e-09	0.305733	0.357	0.247	CTX	SMCHD1	Human	0.00921215	35
3.12304e-07	0.29153	0.468	0.351	CTX	SFRP1	Human	0.0108685	35
1.20939e-07	0.288363	0.362	0.261	CTX	TTC19	Human	0.0118126	35
7.27596e-08	0.28808	0.334	0.226	CTX	ZNF146	Human	0.00770996	35
2.66632e-07	0.258008	0.18	0.101	CTX	UBAC2	Human	0.000671275	35
1.86075e-09	0.256546	0.198	0.103	CTX	ARHGAP12	Human	0.00159051	35
9.1933e-08	0.253794	0.818	0.707	CTX	PTMS	Human	0.00160028	35
5.84228e-09	0.249977	0.132	0.056	CTX	VPS13D	Human	0.000240445	35
3.14527e-16	0.246109	0.137	0.036	CTX	BMP2K	Human	7.52123e-09	35
3.43095e-07	0.281614	0.323	0.228	CTX	NUP160	Human	0.00765869	34
3.19285e-11	0.272228	0.206	0.099	CTX	RMI2	Human	0.00563743	34
4.68968e-13	0.270184	0.111	0.03	CTX	TIMP3	Human	5.88457e-05	34
3.34674e-08	0.26469	0.206	0.115	CTX	FBXO42	Human	0.000175558	34
1.73138e-13	0.252806	0.6	0.398	CTX	SARAF	Human	0.00222473	34
1.12373e-19	0.249776	0.136	0.027	CTX	ALG11	Human	1.13142e-12	34
4.61578e-12	0.245909	0.113	0.033	CTX	ATRN	Human	3.3538e-05	34
9.0826e-21	0.243083	0.117	0.015	CTX	RPTOR	Human	2.51895e-12	34
1.06757e-09	0.282636	0.269	0.16	CTX	HIBCH	Human	0.00759684	33
1.57539e-07	0.272411	0.406	0.289	CTX	MRPL23	Human	0.00413599	33
7.99324e-10	0.263336	0.194	0.097	CTX	ADD2	Human	0.000139205	33
1.12324e-08	0.262945	0.197	0.106	CTX	NBAS	Human	0.000662394	33
4.3155e-11	0.255093	0.137	0.052	CTX	LRRC4B	Human	2.30566e-06	33
4.62916e-10	0.254804	0.184	0.089	CTX	DIP2A	Human	0.00115048	33
6.62996e-16	0.251469	0.12	0.028	CTX	UBE3D	Human	5.80921e-06	33
2.01411e-07	0.251006	0.251	0.157	CTX	RPRD1A	Human	0.00430685	33
7.78484e-11	0.250635	0.147	0.059	CTX	CDC42EP3	Human	0.00232499	33
2.95917e-07	0.302206	0.417	0.313	CTX	GPATCH8	Human	0.0114462	32
7.44578e-10	0.279797	0.34	0.222	CTX	EHMT1	Human	0.00618185	32
1.33321e-06	0.273291	0.328	0.232	CTX	TIAM2	Human	0.0129694	32
6.68059e-07	0.27265	0.229	0.143	CTX	ARHGEF7	Human	0.00639618	32
1.5089e-08	0.251682	0.197	0.105	CTX	CELF5	Human	0.000561466	32
2.32338e-07	0.606824	0.398	0.314	CTX	BTG2	Human	0.00674973	31
2.64128e-07	0.402774	0.411	0.317	CTX	ARX	Human	0.00972373	31
1.19622e-06	0.308429	0.395	0.309	CTX	PKN2	Human	0.0156101	31
9.95399e-08	0.286371	0.352	0.244	CTX	GNL3	Human	0.0109054	31
1.48374e-08	0.277716	0.264	0.158	CTX	KLHL24	Human	0.00610893	31
1.19661e-10	0.270822	0.304	0.178	CTX	RNF145	Human	0.00605938	31
9.85399e-08	0.264359	0.214	0.125	CTX	PTEN	Human	0.00274461	31
8.44259e-07	0.263092	0.189	0.112	CTX	SECISBP2L	Human	0.00651338	31
4.61969e-07	0.261192	0.192	0.113	CTX	PHTF1	Human	0.00755783	31
2.42677e-14	0.25843	0.16	0.054	CTX	PAM16	Human	1.98287e-09	31
1.60551e-10	0.258207	0.124	0.046	CTX	SNAP23	Human	0.000219921	31
1.71378e-09	0.25555	0.18	0.09	CTX	CNOT6L	Human	6.54816e-05	31
1.26924e-09	0.255263	0.182	0.089	CTX	SCAI	Human	0.00599364	31
8.20177e-09	0.253699	0.298	0.186	CTX	MAP7D1	Human	0.00921595	31
1.63688e-09	0.251476	0.171	0.081	CTX	CSGALNACT2	Human	0.000912609	31
4.40865e-13	0.250435	0.115	0.031	CTX	INPP4A	Human	2.15694e-09	31
2.58308e-16	0.249294	0.109	0.02	CTX	SHB	Human	1.35103e-09	31
1.82488e-08	0.249023	0.198	0.11	CTX	TBCD	Human	0.00100777	31
6.46347e-19	0.243781	0.138	0.03	CTX	MTBP	Human	4.71358e-08	31
1.6774e-06	0.266371	0.284	0.195	CTX	TNPO3	Human	0.00946203	30
1.38571e-07	0.26062	0.205	0.118	CTX	GNAO1	Human	0.0077196	30
2.54807e-08	0.255993	0.249	0.15	CTX	VMP1	Human	0.00462038	30
4.17808e-19	0.443798	0.107	0.014	CTX	PARD3B	Human	1.47967e-13	29
1.83559e-06	0.368165	0.246	0.165	CTX	FRMD4B	Human	0.0117826	29
1.28254e-06	0.298468	0.375	0.274	CTX	CSNK2A1	Human	0.00978397	29
3.90161e-08	0.268463	0.26	0.16	CTX	RNF10	Human	0.00707138	29
2.30359e-07	0.268317	0.183	0.103	CTX	TMEM41B	Human	0.00541882	29
4.80932e-07	0.264042	0.188	0.108	CTX	EPB41	Human	0.00873935	29
1.04997e-07	0.263145	0.21	0.121	CTX	ERCC6L2	Human	0.00415327	29
3.40238e-11	0.259267	0.166	0.072	CTX	MSH3	Human	0.000923564	29
1.84273e-09	0.258958	0.177	0.088	CTX	USP37	Human	0.0053985	29
4.65784e-10	0.248205	0.214	0.111	CTX	TMEM181	Human	0.00190948	29
3.91933e-09	0.245171	0.161	0.076	CTX	NUP98	Human	0.000327022	29
2.49294e-14	0.24457	0.126	0.034	CTX	LPP	Human	0.00154046	29
1.1266e-06	0.766862	0.244	0.168	CTX	PCDH9	Human	0.0125702	28
6.57804e-07	0.301204	0.371	0.271	CTX	JAKMIP2	Human	0.0131934	28
4.67944e-07	0.281993	0.454	0.36	CTX	MOB4	Human	0.00958169	28
4.02537e-08	0.25944	0.208	0.119	CTX	AKAP8L	Human	0.00453157	28
7.39815e-09	0.256485	0.202	0.11	CTX	CNOT6	Human	0.000210248	28
3.82006e-07	0.255635	0.248	0.156	CTX	RHOT1	Human	0.0087293	28
4.622e-07	0.254604	0.203	0.12	CTX	CEP162	Human	0.00265009	28
2.93072e-09	0.254098	0.209	0.113	CTX	COCH	Human	0.00137258	28
3.14929e-10	0.253186	0.115	0.041	CTX	ZNF713	Human	1.30772e-05	28
6.37609e-09	0.251689	0.226	0.126	CTX	CD46	Human	0.000400376	28
4.41663e-09	0.24294	0.135	0.059	CTX	LONRF1	Human	0.000185494	28
1.79023e-06	0.295997	0.3	0.207	CTX	CTNNBIP1	Human	0.0105538	27
2.95227e-06	0.290736	0.491	0.409	CTX	ZNF638	Human	0.0141007	27
3.02811e-06	0.289432	0.357	0.263	CTX	DLGAP4	Human	0.010842	27
2.54965e-12	0.283478	0.104	0.028	CTX	L3MBTL4	Human	1.11388e-07	27
1.43926e-06	0.280344	0.176	0.102	CTX	ZNF608	Human	0.0085822	27
4.54805e-08	0.273906	0.214	0.124	CTX	EBPL	Human	0.0088499	27
1.75053e-07	0.270167	0.444	0.328	CTX	ARL5A	Human	0.00968997	27
7.65522e-10	0.256727	0.208	0.108	CTX	MAPK1	Human	0.000618635	27
3.57055e-10	0.252845	0.14	0.057	CTX	ABCC5	Human	7.31084e-05	27
1.05616e-11	0.25255	0.173	0.073	CTX	HTT	Human	9.97146e-05	27
3.29097e-13	0.249385	0.19	0.079	CTX	NUP153	Human	0.00148724	27
1.13575e-18	0.246361	0.126	0.024	CTX	TMEM135	Human	1.14335e-11	27
4.22902e-11	0.245511	0.469	0.307	CTX	LSM8	Human	0.00112865	27
7.49783e-12	0.239314	0.149	0.056	CTX	METTL15	Human	5.01655e-05	27
1.20844e-22	0.370659	0.11	0.009	CTX	XKR4	Human	7.95269e-15	26
2.07886e-09	0.28741	0.371	0.252	CTX	CAPZA1	Human	0.009677	26
5.3427e-07	0.280912	0.581	0.469	CTX	NME1	Human	0.0122938	26
2.49516e-09	0.266637	0.313	0.194	CTX	CNTFR	Human	0.00329116	26
7.04813e-09	0.263284	0.254	0.154	CTX	GIGYF2	Human	0.00880538	26
3.64206e-08	0.262588	0.2	0.111	CTX	CCDC91	Human	0.00676357	26
1.15304e-06	0.256335	0.172	0.098	CTX	CLOCK	Human	0.00527277	26
7.53598e-09	0.254862	0.172	0.088	CTX	COPG2	Human	0.00376129	26
6.19318e-12	0.254832	0.1	0.027	CTX	ELMO1	Human	0.000283996	26
2.93924e-09	0.25409	0.184	0.092	CTX	CERK	Human	0.00162218	26
1.93945e-06	0.250319	0.274	0.182	CTX	SMARCAD1	Human	0.00652678	26
8.27722e-16	0.248155	0.124	0.03	CTX	EXOC2	Human	1.50445e-06	26
2.94375e-11	0.248127	0.162	0.069	CTX	ACER3	Human	0.000122429	26
1.48327e-08	0.24762	0.174	0.089	CTX	CAPN7	Human	0.00180711	26
6.81234e-10	0.246566	0.16	0.072	CTX	FRS2	Human	5.19062e-05	26
5.98498e-10	0.242206	0.153	0.067	CTX	B3GALNT2	Human	0.000205759	26
8.91774e-07	0.2977	0.288	0.195	CTX	UBXN2A	Human	0.00917541	25
9.08684e-07	0.289205	0.3	0.206	CTX	CHAF1A	Human	0.0117627	25
3.49734e-06	0.288948	0.264	0.177	CTX	AP1S2	Human	0.0139207	25
1.10827e-06	0.281569	0.406	0.31	CTX	RAB10	Human	0.0106451	25
1.1278e-07	0.276808	0.265	0.169	CTX	AKIRIN1	Human	0.00802905	25
1.24645e-07	0.264556	0.225	0.139	CTX	STT3B	Human	0.00840187	25
2.87883e-06	0.261905	0.288	0.202	CTX	GOLIM4	Human	0.0101198	25
1.5822e-08	0.258759	0.213	0.118	CTX	AGPAT5	Human	0.00544113	25
2.65021e-06	0.256388	0.175	0.105	CTX	TWSG1	Human	0.00620746	25
6.49527e-10	0.254526	0.149	0.064	CTX	PTBP3	Human	0.00315425	25
2.89011e-09	0.254391	0.166	0.079	CTX	ABL2	Human	0.00188967	25
8.24042e-09	0.250987	0.149	0.07	CTX	AGPS	Human	0.000754341	25
6.237e-09	0.250592	0.207	0.113	CTX	PMS1	Human	0.00367847	25
6.55802e-08	0.244206	0.154	0.078	CTX	RBL2	Human	0.000594911	25
2.04847e-14	0.242814	0.132	0.037	CTX	ZNF625	Human	3.75362e-09	25
1.209e-11	0.352521	0.104	0.031	CTX	DACH2	Human	0.00117228	24
1.09638e-07	0.25599	0.228	0.136	CTX	PPP4R1	Human	0.00746209	24
6.39734e-10	0.254732	0.153	0.067	CTX	CAB39L	Human	0.0016616	24
2.80337e-09	0.247601	0.151	0.069	CTX	PIK3CA	Human	0.00067019	24
7.74984e-08	0.247196	0.161	0.085	CTX	SMIM4	Human	0.000653103	24
3.44954e-08	0.246952	0.19	0.104	CTX	TAF2	Human	0.00484262	24
2.52183e-12	0.241993	0.115	0.034	CTX	TASP1	Human	4.11689e-07	24
2.34905e-07	0.284224	0.268	0.17	CTX	SDCCAG8	Human	0.0114994	23
1.28024e-09	0.27795	0.263	0.159	CTX	RNF11	Human	0.00999989	23
4.60159e-09	0.265756	0.238	0.136	CTX	SYNRG	Human	0.00791192	23
1.21151e-06	0.256365	0.281	0.191	CTX	SCFD1	Human	0.0117242	23
1.7141e-14	0.254007	0.1	0.02	CTX	TBC1D32	Human	3.23034e-08	23
6.76348e-15	0.253094	0.115	0.028	CTX	FAM102B	Human	5.01382e-06	23
8.69053e-09	0.246946	0.129	0.055	CTX	ZNF197	Human	0.00133523	23
2.75467e-07	0.245025	0.237	0.146	CTX	RNF165	Human	0.00504851	23
3.31007e-08	0.242428	0.153	0.075	CTX	PSMD5	Human	0.000276081	23
2.04565e-16	0.24081	0.101	0.016	CTX	PLAG1	Human	8.88017e-11	23
1.06856e-12	0.240271	0.117	0.034	CTX	ZNF44	Human	9.82982e-08	23
1.43362e-07	0.286935	0.223	0.137	CTX	CEP192	Human	0.00966921	22
2.61959e-07	0.261418	0.219	0.132	CTX	SNN	Human	0.0102456	22
5.55522e-07	0.257885	0.321	0.221	CTX	USP14	Human	0.00882943	22
1.00637e-10	0.254117	0.159	0.069	CTX	SLC30A5	Human	0.00205942	22
2.68628e-07	0.249744	0.206	0.123	CTX	MMD	Human	0.00277514	22
8.35193e-13	0.249227	0.175	0.072	CTX	ATP9A	Human	0.000462757	22
7.90267e-13	0.248046	0.105	0.027	CTX	WDR7	Human	2.06002e-08	22
1.57155e-09	0.247265	0.156	0.073	CTX	CHKA	Human	0.00238191	22
6.03406e-09	0.244921	0.915	0.848	CTX	CCNI	Human	0.00152188	22
1.41864e-08	0.309618	0.166	0.083	CTX	MAPT	Human	0.0108615	21
1.98527e-06	0.297944	0.377	0.28	CTX	PXMP2	Human	0.0127488	21
2.77674e-07	0.294922	0.37	0.266	CTX	ZNF43	Human	0.00834468	21
1.45923e-06	0.291817	0.19	0.115	CTX	CIT	Human	0.0128865	21
1.87136e-08	0.273045	0.277	0.174	CTX	DNER	Human	0.00742527	21
6.27182e-08	0.264179	0.281	0.177	CTX	RIMKLB	Human	0.00539773	21
2.13736e-06	0.260391	0.197	0.121	CTX	TDRD3	Human	0.00599243	21
4.29506e-09	0.256165	0.191	0.1	CTX	DDAH1	Human	0.00665404	21
7.46781e-09	0.251461	0.148	0.069	CTX	TBK1	Human	0.00345038	21
2.94868e-08	0.250742	0.156	0.077	CTX	SPATA13	Human	0.000136293	21
8.26321e-10	0.250379	0.172	0.082	CTX	PPP1R21	Human	4.45901e-05	21
1.71385e-07	0.250251	0.174	0.095	CTX	MAPKAPK5	Human	0.00595641	21
6.67164e-07	0.245698	0.138	0.072	CTX	PPP2R3A	Human	0.000772662	21
1.87659e-08	0.245336	0.107	0.042	CTX	DGKH	Human	2.69961e-05	21
4.91855e-10	0.244927	0.161	0.073	CTX	FAM222B	Human	4.80649e-05	21
8.2808e-13	0.243552	0.133	0.043	CTX	SLC16A9	Human	6.02679e-07	21
2.35255e-06	0.308051	0.649	0.588	CTX	BASP1	Human	0.017922	20
2.95597e-06	0.275854	0.509	0.404	CTX	PAK2	Human	0.00974056	20
4.87389e-07	0.269536	0.286	0.194	CTX	MICU1	Human	0.0131269	20
5.89419e-09	0.257239	0.155	0.074	CTX	VPS53	Human	0.0022187	20
3.97108e-13	0.254607	0.13	0.041	CTX	ZDHHC15	Human	8.31213e-07	20
3.25774e-10	0.248408	0.193	0.094	CTX	UBAP1	Human	9.37467e-05	20
4.53422e-07	0.246694	0.174	0.097	CTX	INPP5F	Human	0.00121764	20
6.33087e-07	0.242317	0.126	0.062	CTX	LBH	Human	0.00494947	20
5.149e-13	0.241957	0.118	0.034	CTX	CTPS2	Human	1.4892e-06	20
2.86661e-09	0.241604	0.165	0.078	CTX	XPO7	Human	2.80588e-05	20
6.97488e-10	0.241556	0.176	0.083	CTX	AMOTL1	Human	3.37709e-05	20
4.08716e-07	0.274748	0.185	0.105	CTX	MFNG	Human	0.00803551	19
1.076e-06	0.268438	0.26	0.171	CTX	ZNF83	Human	0.0108492	19
1.28161e-06	0.263994	0.198	0.121	CTX	CADM4	Human	0.00941673	19
5.84425e-12	0.262713	0.102	0.028	CTX	SNAP91	Human	5.71688e-09	19
1.42968e-06	0.261103	0.258	0.171	CTX	TET2	Human	0.00929066	19
2.11813e-06	0.259161	0.224	0.145	CTX	CACUL1	Human	0.0032166	19
4.07258e-07	0.255752	0.277	0.182	CTX	ETNK1	Human	0.00416953	19
7.05283e-11	0.249697	0.189	0.09	CTX	USP49	Human	0.00570279	19
7.25995e-09	0.247065	0.185	0.095	CTX	PSEN1	Human	0.00366166	19
2.54856e-07	0.243926	0.113	0.051	CTX	KLHDC8A	Human	0.00294697	19
1.60188e-10	0.24063	0.141	0.056	CTX	GALNT7	Human	4.91948e-05	19
1.17892e-06	0.299101	0.216	0.137	CTX	RFTN2	Human	0.0115411	18
1.34451e-07	0.290615	0.543	0.448	CTX	SRSF4	Human	0.00829776	18
5.33281e-07	0.275341	0.57	0.455	CTX	SMARCB1	Human	0.0113179	18
1.37314e-07	0.274753	0.496	0.373	CTX	CYC1	Human	0.0101892	18
1.81488e-07	0.271842	0.302	0.199	CTX	FDX1	Human	0.00929814	18
1.93093e-07	0.271442	0.342	0.232	CTX	BOD1	Human	0.016525	18
4.54884e-08	0.266117	0.167	0.087	CTX	ATG10	Human	0.0112497	18
7.54482e-09	0.264891	0.219	0.123	CTX	BTBD7	Human	0.00461898	18
1.06059e-08	0.259142	0.194	0.104	CTX	SPAST	Human	0.010738	18
2.13977e-06	0.253154	0.3	0.206	CTX	BZW2	Human	0.0082764	18
9.84637e-11	0.249941	0.156	0.066	CTX	AKAP10	Human	4.07098e-06	18
7.92921e-13	0.247919	0.128	0.04	CTX	NOL4L	Human	1.39482e-07	18
1.04192e-06	0.246547	0.115	0.056	CTX	SCN3A	Human	0.00719523	18
1.36682e-12	0.245191	0.114	0.032	CTX	IGF2R	Human	3.10202e-06	18
2.63265e-10	0.243505	0.116	0.043	CTX	STK3	Human	0.00195652	18
6.42305e-10	0.242567	0.14	0.059	CTX	RPP38	Human	0.000516067	18
4.10445e-10	0.237589	0.172	0.079	CTX	AGO1	Human	0.000323815	18
3.06186e-14	0.235393	0.11	0.026	CTX	TMEM65	Human	1.89301e-09	18
3.80455e-14	0.234648	0.104	0.023	CTX	HEATR5B	Human	9.13691e-08	18
9.53913e-08	0.336612	0.335	0.24	CTX	CLIC4	Human	0.0113147	17
1.05097e-07	0.298979	0.278	0.182	CTX	C1QTNF4	Human	0.008771	17
2.80831e-07	0.295309	0.326	0.218	CTX	RGS16	Human	0.0141711	17
1.68554e-08	0.286912	0.235	0.139	CTX	PRKX	Human	0.0156892	17
1.33195e-06	0.281616	0.448	0.347	CTX	ASH1L	Human	0.0149185	17
2.65439e-08	0.264991	0.232	0.137	CTX	RNF115	Human	0.00846073	17
4.8276e-09	0.262588	0.176	0.088	CTX	TP53RK	Human	0.00525048	17
1.09828e-09	0.262194	0.641	0.511	CTX	UBE2D2	Human	0.00913356	17
2.29493e-07	0.255073	0.268	0.176	CTX	HSD17B12	Human	0.0101559	17
2.63286e-06	0.25462	0.357	0.26	CTX	ANKRD10	Human	0.0117419	17
5.98674e-07	0.254421	0.277	0.182	CTX	PAXBP1	Human	0.00902321	17
4.58845e-14	0.250254	0.126	0.035	CTX	GALNT2	Human	2.77998e-07	17
8.7791e-14	0.243612	0.124	0.035	CTX	ZNF736	Human	6.22842e-09	17
9.447e-08	0.239271	0.192	0.107	CTX	INTS8	Human	0.00102042	17
5.74692e-07	0.238826	0.169	0.095	CTX	YTHDC2	Human	0.0056683	17
4.11315e-08	0.234311	0.154	0.077	CTX	MTA3	Human	0.000200132	17
3.89196e-10	0.703249	0.108	0.038	CTX	ERBB4	Human	0.00288379	16
2.53431e-06	0.316235	0.426	0.327	CTX	RNMT	Human	0.0096311	16
1.47466e-06	0.28949	0.189	0.115	CTX	BLOC1S4	Human	0.0141436	16
3.09813e-06	0.275718	0.362	0.269	CTX	COA1	Human	0.0148194	16
3.3584e-06	0.267101	0.351	0.263	CTX	APLP2	Human	0.0214796	16
1.84958e-08	0.259718	0.225	0.131	CTX	DNAAF2	Human	0.00495085	16
4.2495e-09	0.257407	0.198	0.105	CTX	METTL21A	Human	0.000477075	16
2.08376e-08	0.256623	0.197	0.108	CTX	TXNDC16	Human	0.00635763	16
2.12794e-06	0.254993	0.224	0.144	CTX	KPNA4	Human	0.0207284	16
5.05215e-11	0.254277	0.219	0.11	CTX	WDHD1	Human	0.0070115	16
9.54481e-08	0.252601	0.171	0.092	CTX	PSMG4	Human	0.00411076	16
3.13088e-09	0.250046	0.181	0.091	CTX	CREM	Human	0.000529068	16
2.11927e-15	0.24415	0.139	0.039	CTX	ACVR1B	Human	1.7047e-07	16
3.04384e-12	0.242293	0.119	0.037	CTX	RNF175	Human	9.25666e-07	16
8.67872e-08	0.240733	0.162	0.086	CTX	ADIPOR2	Human	0.00108005	16
1.60309e-06	0.323724	0.537	0.464	CTX	CHD7	Human	0.0118478	15
1.21597e-06	0.301253	0.289	0.202	CTX	CCNG2	Human	0.0135925	15
7.47074e-07	0.275251	0.353	0.252	CTX	MYO1B	Human	0.011602	15
5.22061e-08	0.273249	0.29	0.188	CTX	EIF2AK1	Human	0.00742652	15
5.31496e-08	0.261527	0.219	0.128	CTX	SND1	Human	0.00377635	15
4.2183e-18	0.257152	0.102	0.013	CTX	MTMR7	Human	5.32277e-11	15
1.71345e-08	0.255491	0.166	0.086	CTX	TGIF2	Human	0.00273089	15
4.29332e-07	0.252008	0.257	0.164	CTX	APPBP2	Human	0.01334	15
1.14926e-08	0.250435	0.26	0.156	CTX	TFDP1	Human	0.00361674	15
1.53398e-12	0.249435	0.141	0.05	CTX	SRRM3	Human	0.000599735	15
3.24625e-08	0.248666	0.144	0.07	CTX	USP13	Human	0.00699475	15
3.16002e-13	0.245243	0.149	0.052	CTX	KHDC1	Human	4.60814e-05	15
4.76672e-13	0.243541	0.137	0.046	CTX	KHDRBS3	Human	7.08393e-05	15
2.50293e-10	0.24354	0.179	0.083	CTX	TAB2	Human	0.000279503	15
2.08247e-11	0.24342	0.138	0.052	CTX	CDKL5	Human	5.72937e-05	15
2.27016e-09	0.243307	0.15	0.068	CTX	LATS1	Human	5.05284e-05	15
4.78866e-11	0.242375	0.158	0.067	CTX	MAPK14	Human	0.000230362	15
1.14684e-20	0.241963	0.104	0.01	CTX	RAB12	Human	3.17247e-14	15
2.17641e-20	0.240222	0.125	0.02	CTX	DDX47	Human	1.02644e-11	15
7.28791e-12	0.234571	0.108	0.031	CTX	HIF3A	Human	1.11324e-05	15
1.69869e-17	0.498239	0.102	0.015	CTX	PCDH7	Human	8.72098e-09	14
4.71719e-10	0.307172	0.244	0.135	CTX	PAX6	Human	0.0146204	14
1.258e-06	0.303374	0.352	0.255	CTX	YWHAG	Human	0.0112229	14
5.1265e-07	0.292233	0.177	0.102	CTX	SEMA5A	Human	0.00878353	14
1.92066e-06	0.280074	0.37	0.272	CTX	MRPS34	Human	0.0181492	14
1.9584e-06	0.274665	0.346	0.254	CTX	RRAGA	Human	0.0244765	14
5.47603e-07	0.268481	0.37	0.271	CTX	MKRN1	Human	0.0125444	14
3.82581e-08	0.261541	0.337	0.227	CTX	FKBP4	Human	0.009897	14
5.31981e-09	0.26098	0.782	0.681	CTX	KHDRBS1	Human	0.00063696	14
7.14984e-07	0.259977	0.514	0.411	CTX	SNRNP70	Human	0.0127079	14
4.11895e-11	0.255159	0.172	0.075	CTX	DCAF6	Human	0.00103582	14
6.4886e-11	0.252456	0.811	0.674	CTX	ZNF428	Human	0.0041665	14
6.78066e-08	0.25019	0.17	0.091	CTX	ZNF708	Human	0.00947012	14
7.04919e-09	0.24855	0.219	0.122	CTX	INTU	Human	0.00353968	14
6.05217e-14	0.246722	0.135	0.042	CTX	PARP16	Human	8.70997e-05	14
1.10112e-08	0.24667	0.154	0.074	CTX	CRTC3	Human	0.000632465	14
3.03081e-09	0.245877	0.134	0.057	CTX	ZNF277	Human	0.000566305	14
2.57045e-06	0.23531	0.203	0.126	CTX	FADS2	Human	0.00435023	14
7.70975e-21	0.339032	0.1	0.008	CTX	NTRK3	Human	6.67445e-16	13
1.65669e-06	0.30709	0.376	0.278	CTX	SNF8	Human	0.0180186	13
3.7932e-07	0.293919	0.325	0.226	CTX	SCAPER	Human	0.00662224	13
3.22019e-12	0.289872	0.105	0.029	CTX	COTL1	Human	9.62918e-09	13
1.53817e-06	0.288787	0.161	0.093	CTX	SDC2	Human	0.0138136	13
4.16253e-07	0.271885	0.32	0.221	CTX	CTNNA1	Human	0.01719	13
8.67793e-07	0.267046	0.261	0.168	CTX	SLAIN1	Human	0.014663	13
1.2199e-07	0.266216	0.243	0.15	CTX	EFNB1	Human	0.00883557	13
2.18693e-07	0.255491	0.109	0.048	CTX	RIMS1	Human	0.00134804	13
1.88655e-06	0.249791	0.2	0.122	CTX	EEA1	Human	0.0171332	13
1.15666e-16	0.248197	0.104	0.017	CTX	LMTK2	Human	5.68031e-11	13
4.78009e-15	0.247631	0.113	0.026	CTX	SLC38A9	Human	9.79833e-07	13
1.73969e-11	0.245805	0.122	0.041	CTX	PBX4	Human	3.68898e-07	13
1.83655e-08	0.245405	0.177	0.092	CTX	ZNRF1	Human	6.2779e-05	13
5.02749e-12	0.245137	0.123	0.04	CTX	STIM2	Human	5.58466e-07	13
1.16875e-16	0.244978	0.155	0.045	CTX	LIN54	Human	3.34457e-06	13
5.00861e-14	0.244864	0.103	0.023	CTX	KLHL2	Human	3.46534e-07	13
2.57551e-13	0.244625	0.126	0.037	CTX	FGD6	Human	1.75539e-08	13
1.35414e-06	0.243788	0.166	0.094	CTX	NUDCD3	Human	0.00420864	13
4.87787e-07	0.243609	0.197	0.116	CTX	NHLRC2	Human	0.00301649	13
1.62151e-16	0.24217	0.115	0.023	CTX	UNC13B	Human	2.60603e-11	13
8.851e-08	0.240292	0.16	0.083	CTX	ZDHHC21	Human	0.000213888	13
3.23226e-10	0.236492	0.145	0.06	CTX	RNF149	Human	0.000487433	13
2.15242e-13	0.235763	0.119	0.033	CTX	WNT5B	Human	1.11557e-06	13
6.41244e-08	0.229313	0.12	0.053	CTX	ERCC8	Human	0.000274685	13
3.20798e-06	0.302512	0.109	0.053	CTX	ARC	Human	0.0214903	12
1.75168e-07	0.297832	0.332	0.23	CTX	PSPC1	Human	0.00981875	12
1.29343e-07	0.272956	0.217	0.13	CTX	SCD5	Human	0.0128769	12
2.77182e-08	0.263382	0.371	0.255	CTX	ENOPH1	Human	0.012233	12
1.19248e-06	0.262242	0.174	0.101	CTX	MB21D2	Human	0.0104035	12
4.98806e-08	0.25856	0.205	0.118	CTX	ARMC10	Human	0.0165281	12
1.54057e-06	0.25639	0.258	0.173	CTX	ATXN2	Human	0.0126817	12
1.08036e-06	0.256326	0.361	0.26	CTX	LEPROTL1	Human	0.00948579	12
1.41456e-11	0.250401	0.138	0.051	CTX	SNX29	Human	0.00015459	12
9.5303e-11	0.247279	0.17	0.075	CTX	TRIQK	Human	0.00309776	12
2.14001e-06	0.246163	0.191	0.117	CTX	TUBGCP3	Human	0.00645235	12
3.51998e-10	0.245395	0.122	0.046	CTX	PIK3CB	Human	4.00584e-06	12
4.7979e-12	0.24368	0.179	0.076	CTX	PIP5K1A	Human	8.46135e-05	12
2.22618e-06	0.243283	0.193	0.119	CTX	IFNGR2	Human	0.00682792	12
1.09233e-06	0.242317	0.113	0.054	CTX	DIAPH2	Human	0.00786594	12
4.06541e-09	0.241971	0.106	0.039	CTX	RCL1	Human	0.00323105	12
4.11252e-11	0.240849	0.129	0.046	CTX	SP8	Human	0.00225205	12
3.81024e-16	0.236632	0.104	0.018	CTX	PDK3	Human	7.32755e-12	12
2.88636e-18	0.235768	0.111	0.017	CTX	PIGN	Human	4.26172e-10	12
1.38477e-08	0.235286	0.198	0.105	CTX	NCOA6	Human	0.00513486	12
1.38768e-07	0.281918	0.379	0.267	CTX	MTCH1	Human	0.0154079	11
2.2422e-07	0.267587	0.288	0.189	CTX	ZMYND8	Human	0.00418168	11
1.5297e-06	0.266171	0.289	0.198	CTX	THOC1	Human	0.014439	11
5.62137e-09	0.264077	0.287	0.176	CTX	SKIL	Human	0.00750596	11
1.38013e-08	0.26309	0.298	0.191	CTX	SLC38A1	Human	0.00520459	11
1.71092e-06	0.262437	0.272	0.184	CTX	FNTA	Human	0.0131062	11
2.67029e-06	0.261942	0.147	0.083	CTX	CCDC85B	Human	0.0110886	11
8.80427e-08	0.261115	0.34	0.229	CTX	MRPL19	Human	0.00998927	11
3.29615e-09	0.25514	0.196	0.102	CTX	SMAD1	Human	0.00215612	11
4.88226e-09	0.253083	0.21	0.113	CTX	ABI1	Human	0.0065152	11
2.31289e-10	0.250806	0.23	0.122	CTX	OPA1	Human	0.00991904	11
2.10974e-08	0.248029	0.19	0.102	CTX	FUBP3	Human	0.00696037	11
9.69234e-12	0.246348	0.167	0.07	CTX	IP6K1	Human	7.32952e-05	11
1.04857e-06	0.246278	0.845	0.779	CTX	NDUFS5	Human	0.0129108	11
7.56904e-09	0.24622	0.18	0.094	CTX	RIC8B	Human	2.56868e-05	11
2.89909e-12	0.245652	0.117	0.035	CTX	SMPD3	Human	8.88869e-06	11
1.25393e-13	0.245394	0.125	0.036	CTX	PYGO1	Human	2.6398e-06	11
6.7623e-10	0.244461	0.108	0.038	CTX	PPP3CC	Human	2.18191e-05	11
1.48949e-11	0.241775	0.17	0.072	CTX	BCL2L1	Human	0.00139727	11
1.85879e-11	0.240984	0.148	0.057	CTX	METAP1D	Human	0.000179136	11
1.32393e-10	0.240794	0.15	0.063	CTX	AEBP2	Human	3.7451e-06	11
1.63113e-16	0.240382	0.105	0.018	CTX	ETV6	Human	2.9379e-11	11
3.95179e-10	0.23836	0.158	0.071	CTX	TBC1D1	Human	0.00552659	11
2.73151e-11	0.237861	0.115	0.037	CTX	EPHB1	Human	2.84262e-05	11
5.5436e-07	0.406756	0.35	0.267	CTX	PID1	Human	0.0124321	10
1.10732e-22	0.313458	0.1	0.005	CTX	DAB1	Human	4.0557e-17	10
1.27529e-06	0.29814	0.559	0.462	CTX	POLR2L	Human	0.0103546	10
2.03747e-06	0.294381	0.196	0.116	CTX	CELF4	Human	0.0173012	10
8.62322e-07	0.282817	0.325	0.226	CTX	TSEN34	Human	0.00846694	10
2.38883e-07	0.275476	0.332	0.237	CTX	RAF1	Human	0.0175061	10
2.02987e-06	0.273767	0.375	0.282	CTX	TNPO1	Human	0.0158517	10
4.93069e-07	0.270159	0.372	0.276	CTX	TXNL4A	Human	0.00990839	10
1.74374e-17	0.263838	0.105	0.016	CTX	CNNM2	Human	5.35619e-11	10
1.50036e-07	0.263461	0.225	0.135	CTX	NRIP1	Human	0.00643983	10
1.92146e-08	0.261439	0.656	0.53	CTX	ITM2B	Human	0.00927913	10
3.21133e-06	0.257487	0.192	0.119	CTX	PDCD2	Human	0.0149305	10
8.33335e-07	0.256454	0.235	0.149	CTX	ANKRD26	Human	0.00514255	10
1.51054e-06	0.254311	0.196	0.12	CTX	MSRB2	Human	0.00353573	10
9.98969e-09	0.250962	0.205	0.113	CTX	UBE2G1	Human	0.00362438	10
1.08619e-06	0.249726	0.239	0.153	CTX	ZMYND11	Human	0.00644111	10
7.34783e-09	0.248852	0.168	0.083	CTX	TTC21B	Human	5.55628e-05	10
1.92729e-07	0.248523	0.204	0.119	CTX	OXCT1	Human	0.00349271	10
4.04818e-07	0.248066	0.207	0.123	CTX	SYNC	Human	0.0127581	10
1.5744e-06	0.243767	0.213	0.135	CTX	NEK1	Human	0.00462713	10
1.75902e-08	0.241695	0.185	0.097	CTX	MAX	Human	0.00124379	10
1.34541e-06	0.241552	0.236	0.151	CTX	ARMC8	Human	0.0114377	10
1.75581e-11	0.241351	0.11	0.033	CTX	HPCAL1	Human	6.04703e-06	10
9.43869e-09	0.239466	0.153	0.073	CTX	UCK2	Human	4.85445e-05	10
7.05384e-12	0.239078	0.138	0.05	CTX	SCAMP5	Human	5.01327e-07	10
7.95564e-11	0.237993	0.116	0.04	CTX	ZHX3	Human	0.000113137	10
6.70897e-12	0.237872	0.109	0.031	CTX	TCP11L1	Human	6.71238e-06	10
2.44963e-08	0.237262	0.116	0.05	CTX	NSMAF	Human	0.0001272	10
4.57096e-12	0.236346	0.14	0.051	CTX	MTR	Human	2.4332e-06	10
2.00473e-07	0.23594	0.204	0.119	CTX	GLYR1	Human	0.00289881	10
2.97526e-11	0.232944	0.113	0.036	CTX	AP3S2	Human	4.57361e-07	10
1.96272e-06	0.626383	0.226	0.158	CTX	MGAT4C	Human	0.027154	9
5.04305e-07	0.626064	0.626	0.593	CTX	MEIS2	Human	0.0158757	9
2.34126e-19	0.322964	0.105	0.012	CTX	ZNF423	Human	4.48552e-15	9
1.67628e-08	0.317804	0.26	0.161	CTX	INSIG1	Human	0.0194007	9
2.37983e-06	0.288022	0.709	0.635	CTX	GPM6B	Human	0.015352	9
2.82803e-07	0.284622	0.597	0.509	CTX	ELAVL4	Human	0.0185963	9
2.3551e-08	0.283826	0.673	0.595	CTX	NDUFB2	Human	0.0129479	9
7.05032e-07	0.282671	0.336	0.234	CTX	TRIM36	Human	0.00996231	9
3.49193e-07	0.274938	0.161	0.087	CTX	SCG5	Human	0.00662075	9
2.00219e-18	0.267425	0.103	0.013	CTX	RGS20	Human	1.35229e-13	9
2.66066e-06	0.26626	0.352	0.258	CTX	ZNF131	Human	0.0109133	9
2.99176e-08	0.257819	0.231	0.135	CTX	MTA1	Human	0.0105077	9
1.07306e-07	0.254953	0.225	0.136	CTX	PWWP2A	Human	0.00719443	9
7.16498e-08	0.252846	0.207	0.12	CTX	MPZL1	Human	0.00347596	9
1.13158e-07	0.252522	0.783	0.618	CTX	RAC1	Human	0.00210627	9
3.8514e-09	0.251508	0.179	0.092	CTX	DIXDC1	Human	0.00203818	9
1.76366e-10	0.246751	0.109	0.036	CTX	LIPA	Human	5.68421e-06	9
8.2706e-11	0.246695	0.179	0.082	CTX	UNK	Human	9.00249e-05	9
5.40885e-18	0.245987	0.108	0.016	CTX	SERTAD4	Human	6.69811e-10	9
1.15689e-07	0.245936	0.203	0.116	CTX	LPGAT1	Human	0.00130956	9
3.40706e-06	0.244411	0.115	0.058	CTX	RFXAP	Human	0.0145934	9
7.49226e-10	0.242512	0.112	0.04	CTX	ACVR1	Human	1.99145e-05	9
1.39907e-12	0.241593	0.131	0.043	CTX	AVL9	Human	2.38131e-05	9
3.11933e-08	0.240387	0.147	0.072	CTX	PPFIA1	Human	0.001172	9
2.76863e-08	0.240246	0.144	0.07	CTX	UHRF1BP1L	Human	0.00427437	9
3.24954e-07	0.238635	0.122	0.058	CTX	SRSF8	Human	0.00747892	9
1.13142e-10	0.237529	0.127	0.047	CTX	SLC12A2	Human	6.42974e-05	9
4.73723e-08	0.237386	0.152	0.075	CTX	MICAL3	Human	0.00332461	9
2.17153e-09	0.234416	0.103	0.036	CTX	CCDC57	Human	4.173e-06	9
4.82965e-11	0.233333	0.154	0.063	CTX	EYA3	Human	6.81261e-06	9
5.27503e-16	0.326216	0.1	0.017	CTX	CHN2	Human	1.53575e-10	8
2.97303e-07	0.274192	0.323	0.227	CTX	RAB6A	Human	0.0189506	8
1.56569e-08	0.271758	0.507	0.384	CTX	RBM17	Human	0.00906442	8
5.63e-08	0.27142	0.232	0.14	CTX	PIGX	Human	0.0134121	8
5.45688e-19	0.270776	0.101	0.011	CTX	ST6GALNAC3	Human	1.75843e-14	8
1.08215e-10	0.270714	0.11	0.036	CTX	TCF7L1	Human	2.601e-07	8
2.13723e-06	0.263611	0.287	0.201	CTX	UBE2D1	Human	0.010142	8
2.91031e-06	0.257538	0.377	0.281	CTX	FNBP4	Human	0.026152	8
1.01768e-07	0.253164	0.178	0.098	CTX	TRAF4	Human	0.00936367	8
1.40407e-07	0.251486	0.214	0.127	CTX	ARHGAP35	Human	0.00628141	8
1.10061e-10	0.250938	0.186	0.087	CTX	KDM3B	Human	0.00145235	8
4.21014e-14	0.250514	0.114	0.029	CTX	SNX9	Human	1.23896e-08	8
1.34133e-07	0.248413	0.31	0.204	CTX	COX16	Human	0.00278345	8
2.4412e-12	0.247876	0.164	0.066	CTX	INO80	Human	0.00011355	8
7.63386e-08	0.245093	0.194	0.107	CTX	CCM2	Human	0.00159855	8
1.57201e-09	0.243882	0.114	0.043	CTX	BACE1	Human	3.18525e-06	8
5.60285e-12	0.243813	0.129	0.044	CTX	HDX	Human	5.78738e-05	8
3.34408e-06	0.242305	0.745	0.646	CTX	SRSF2	Human	0.0105168	8
1.5535e-12	0.242019	0.112	0.031	CTX	RASGEF1B	Human	1.99275e-05	8
3.19287e-17	0.235446	0.11	0.019	CTX	LRIG1	Human	7.65007e-09	8
2.8024e-06	0.234443	0.158	0.091	CTX	RAB22A	Human	0.0138325	8
7.78798e-09	0.227916	0.166	0.081	CTX	CEBPZOS	Human	8.4888e-05	8
3.38804e-06	0.528131	0.323	0.244	CTX	SOX6	Human	0.0248966	7
2.29153e-06	0.31566	0.352	0.272	CTX	TRIM24	Human	0.0114556	7
1.17022e-06	0.299932	0.342	0.256	CTX	ARRDC3	Human	0.0141595	7
2.11016e-08	0.286205	0.436	0.327	CTX	DAAM1	Human	0.0170666	7
1.6362e-07	0.284084	0.407	0.296	CTX	DYNC1H1	Human	0.0103458	7
7.51839e-07	0.270838	0.646	0.565	CTX	UBE2E3	Human	0.0106669	7
8.54741e-08	0.267646	0.262	0.164	CTX	GTF2F2	Human	0.000536022	7
2.33579e-06	0.267172	0.299	0.208	CTX	RBM26	Human	0.01636	7
3.8287e-09	0.265791	0.249	0.145	CTX	IQCB1	Human	0.00161369	7
1.02623e-09	0.259179	0.172	0.082	CTX	KCMF1	Human	0.00228113	7
9.52691e-10	0.257143	0.192	0.095	CTX	GLMN	Human	0.000465729	7
1.86187e-07	0.254557	0.177	0.098	CTX	CRLS1	Human	0.00808213	7
4.64585e-09	0.254036	0.119	0.048	CTX	DYNC1I1	Human	0.0027278	7
1.88558e-08	0.253544	0.156	0.076	CTX	KLHL13	Human	0.00832539	7
1.74296e-10	0.253261	0.214	0.111	CTX	ABHD12	Human	0.00708229	7
2.21997e-10	0.250709	0.111	0.038	CTX	DPH6	Human	0.000389755	7
1.26324e-09	0.250021	0.138	0.058	CTX	PARG	Human	3.17335e-05	7
4.11962e-11	0.249544	0.153	0.062	CTX	HECTD2	Human	2.25102e-05	7
9.55203e-08	0.247976	0.212	0.124	CTX	IBTK	Human	0.00177968	7
1.59382e-08	0.246159	0.207	0.116	CTX	CMC1	Human	0.00115138	7
1.81134e-09	0.245527	0.17	0.081	CTX	INTS7	Human	0.00013619	7
1.10225e-12	0.245326	0.124	0.038	CTX	RAI1	Human	5.82811e-08	7
1.99846e-11	0.244849	0.136	0.051	CTX	ATP13A3	Human	4.74405e-06	7
1.24743e-07	0.244045	0.204	0.117	CTX	ATAD1	Human	0.00509673	7
2.51839e-10	0.243294	0.118	0.043	CTX	SPOPL	Human	1.23502e-05	7
4.23805e-09	0.241808	0.144	0.065	CTX	TEX9	Human	0.00619165	7
5.34536e-09	0.241544	0.254	0.149	CTX	RBM33	Human	0.00513052	7
3.56501e-08	0.241339	0.364	0.246	CTX	LYPLA1	Human	0.0144822	7
8.40773e-07	0.241156	0.315	0.216	CTX	MSH6	Human	0.0135123	7
7.13235e-13	0.239914	0.121	0.036	CTX	PREP	Human	3.14446e-06	7
1.4192e-13	0.239846	0.125	0.036	CTX	INTS9	Human	2.03982e-08	7
2.47491e-11	0.238367	0.141	0.053	CTX	LIMD1	Human	0.000270233	7
1.09827e-12	0.236991	0.12	0.036	CTX	SLC35G2	Human	2.21532e-06	7
2.1863e-13	0.236731	0.116	0.031	CTX	SARM1	Human	5.00142e-10	7
1.45263e-09	0.230774	0.141	0.06	CTX	LRCH2	Human	0.00133283	7
2.59891e-06	0.404918	0.27	0.188	CTX	PCSK1N	Human	0.0110199	6
4.4433e-24	0.369669	0.101	0.003	CTX	FAT3	Human	4.55968e-18	6
3.76356e-07	0.314514	0.286	0.191	CTX	TTYH1	Human	0.0153869	6
1.43359e-07	0.293677	0.219	0.128	CTX	INA	Human	0.0147395	6
1.13434e-07	0.281019	0.588	0.504	CTX	RBPJ	Human	0.01428	6
1.46329e-07	0.278661	0.475	0.369	CTX	PPM1G	Human	0.00194482	6
6.06274e-07	0.275026	0.156	0.085	CTX	ETV1	Human	0.0268395	6
1.10127e-06	0.269885	0.249	0.163	CTX	FHL1	Human	0.013209	6
1.71498e-08	0.268861	0.232	0.135	CTX	HELZ	Human	0.000244749	6
3.06846e-07	0.267885	0.11	0.05	CTX	GRIK3	Human	0.0106966	6
2.81073e-06	0.267716	0.359	0.265	CTX	HIF1A	Human	0.0141155	6
1.00319e-07	0.263323	0.635	0.517	CTX	SNX3	Human	0.015472	6
3.22253e-06	0.260394	0.345	0.249	CTX	CSTF3	Human	0.0103559	6
4.10923e-07	0.259361	0.348	0.242	CTX	TXNRD1	Human	0.0144068	6
5.35872e-08	0.257427	0.21	0.118	CTX	CSNK1G3	Human	0.00233343	6
2.73096e-06	0.25645	0.332	0.236	CTX	PAPSS1	Human	0.0209201	6
3.10836e-16	0.254536	0.14	0.038	CTX	BTBD1	Human	3.12541e-08	6
1.12625e-10	0.253213	0.143	0.057	CTX	SERPINE2	Human	0.00029141	6
4.96385e-09	0.252256	0.204	0.11	CTX	ARL13B	Human	0.00562172	6
6.19167e-07	0.250579	0.529	0.413	CTX	UQCRFS1	Human	0.0164533	6
1.12691e-08	0.250091	0.209	0.115	CTX	ZNF260	Human	0.00580669	6
4.65289e-07	0.248288	0.239	0.151	CTX	TRMT11	Human	0.00160782	6
1.82638e-08	0.246612	0.222	0.128	CTX	ZNF618	Human	0.00747696	6
6.80712e-08	0.245527	0.254	0.156	CTX	MCMBP	Human	0.0127597	6
1.53927e-06	0.24466	0.198	0.12	CTX	FEZ2	Human	0.0140303	6
1.02255e-06	0.243118	0.392	0.289	CTX	SECISBP2	Human	0.0209464	6
1.88579e-14	0.241141	0.109	0.025	CTX	SLC20A2	Human	4.46928e-11	6
4.34977e-07	0.240889	0.227	0.14	CTX	YES1	Human	0.0067677	6
9.3972e-11	0.240754	0.142	0.056	CTX	GPD2	Human	0.00011627	6
1.05103e-15	0.240407	0.12	0.028	CTX	MRPL38	Human	6.81748e-10	6
4.81553e-09	0.239944	0.133	0.057	CTX	NF2	Human	0.0067194	6
7.81052e-08	0.239692	0.242	0.145	CTX	WASF1	Human	0.020614	6
7.75625e-11	0.234964	0.125	0.045	CTX	MFHAS1	Human	4.52872e-05	6
1.10349e-08	0.232774	0.121	0.052	CTX	YAP1	Human	0.00500245	6
5.37767e-07	0.23211	0.165	0.091	CTX	GTF2E2	Human	0.00313887	6
9.42199e-07	0.2315	0.174	0.099	CTX	FBXO28	Human	0.0112868	6
5.07093e-10	0.231273	0.113	0.04	CTX	L3MBTL3	Human	0.00526765	6
4.2285e-07	0.475073	0.427	0.332	CTX	NRXN1	Human	0.00953777	5
1.14268e-22	0.424008	0.1	0.005	CTX	PTPRM	Human	3.12654e-18	5
8.89009e-08	0.395299	0.757	0.754	CTX	TCF4	Human	0.0198034	5
1.49873e-06	0.380019	0.311	0.226	CTX	EPHA4	Human	0.0166496	5
7.02824e-17	0.369373	0.106	0.018	CTX	FHIT	Human	1.15655e-09	5
3.59713e-07	0.352127	0.452	0.364	CTX	TNRC6B	Human	0.0185845	5
4.0284e-17	0.299606	0.103	0.016	CTX	COL4A5	Human	1.92709e-10	5
8.76106e-08	0.299394	0.391	0.276	CTX	MAF1	Human	0.0105019	5
1.35206e-06	0.289673	0.323	0.224	CTX	ZNF91	Human	0.0101639	5
9.34972e-18	0.288298	0.102	0.014	CTX	LYPD6	Human	1.97038e-11	5
3.2608e-07	0.2821	0.345	0.249	CTX	TMEM160	Human	0.0105122	5
1.34706e-06	0.281535	0.277	0.187	CTX	NAA15	Human	0.0113316	5
1.01937e-06	0.276478	0.333	0.238	CTX	MYCBP2	Human	0.0168788	5
7.54287e-07	0.274338	0.286	0.196	CTX	MAPK6	Human	0.0187164	5
1.09986e-06	0.270973	0.308	0.222	CTX	ACSL3	Human	0.0227266	5
1.76945e-06	0.264652	0.314	0.219	CTX	CTNNAL1	Human	0.00901305	5
3.21103e-07	0.26281	0.313	0.213	CTX	USP10	Human	0.0130471	5
6.47009e-08	0.261318	0.121	0.054	CTX	SERP2	Human	0.00508118	5
1.67756e-06	0.261172	0.148	0.082	CTX	PLCE1	Human	0.00960618	5
4.6138e-09	0.260236	0.155	0.073	CTX	FAM184A	Human	0.00059224	5
4.32662e-16	0.256779	0.216	0.086	CTX	APTX	Human	5.92549e-05	5
6.46261e-10	0.253646	0.199	0.1	CTX	KPNA5	Human	7.45693e-06	5
1.86254e-06	0.253597	0.292	0.201	CTX	SGCE	Human	0.0189148	5
2.5566e-06	0.253249	0.177	0.104	CTX	ADAM17	Human	0.0127171	5
1.30892e-08	0.25302	0.178	0.092	CTX	ARHGEF9	Human	0.000286841	5
1.73307e-07	0.25269	0.198	0.114	CTX	ANKRD46	Human	0.00493185	5
1.01508e-06	0.252383	0.202	0.123	CTX	CLTB	Human	0.0112409	5
1.91885e-08	0.251704	0.212	0.121	CTX	HBP1	Human	0.0128263	5
2.83133e-09	0.251542	0.118	0.047	CTX	GAN	Human	0.000171069	5
5.02755e-09	0.251225	0.303	0.193	CTX	ORC4	Human	0.00933464	5
1.86522e-07	0.250118	0.246	0.153	CTX	USO1	Human	0.00252633	5
1.59315e-07	0.248933	0.185	0.103	CTX	GOLT1B	Human	0.00235609	5
3.05246e-06	0.248672	0.292	0.204	CTX	UBQLN1	Human	0.0102244	5
5.94619e-08	0.245583	0.225	0.132	CTX	PPME1	Human	0.0102886	5
9.73988e-07	0.245101	0.23	0.145	CTX	PALM	Human	0.00366175	5
1.33701e-09	0.244507	0.124	0.05	CTX	WNT7A	Human	0.000249064	5
1.09754e-07	0.244334	0.267	0.174	CTX	SNAPC3	Human	0.0278179	5
1.82534e-07	0.243929	0.155	0.082	CTX	LDB2	Human	0.00894889	5
3.59266e-09	0.240288	0.169	0.082	CTX	MTMR2	Human	0.000357057	5
1.02295e-09	0.239676	0.174	0.083	CTX	TMEM203	Human	0.00508848	5
5.36775e-08	0.239129	0.174	0.092	CTX	ABCB7	Human	0.000270829	5
2.28854e-09	0.236786	0.147	0.066	CTX	ELOVL2	Human	3.15136e-05	5
1.95886e-07	0.236364	0.144	0.073	CTX	FAXC	Human	0.0167006	5
3.60156e-13	0.235802	0.116	0.032	CTX	DNM2	Human	5.74195e-06	5
4.41629e-14	0.235699	0.119	0.031	CTX	IPMK	Human	2.42498e-06	5
1.13944e-08	0.234562	0.144	0.067	CTX	PARP6	Human	0.000694439	5
1.24895e-07	0.234007	0.173	0.094	CTX	NUP214	Human	0.00318997	5
4.59006e-12	0.232801	0.125	0.041	CTX	RAPGEF1	Human	1.94221e-08	5
1.00377e-06	0.231749	0.209	0.129	CTX	PHC2	Human	0.00317714	5
1.25159e-14	0.230636	0.106	0.023	CTX	PIGL	Human	1.54043e-07	5
5.61706e-09	0.229049	0.147	0.067	CTX	LEMD3	Human	9.9703e-05	5
2.78697e-22	0.478861	0.101	0.006	CTX	EMX1	Human	4.751e-18	4
3.0427e-07	0.403144	0.363	0.286	CTX	TBL1XR1	Human	0.0138442	4
3.19969e-06	0.330718	0.38	0.299	CTX	PDS5B	Human	0.0259824	4
3.96641e-07	0.309495	0.513	0.429	CTX	FDFT1	Human	0.013854	4
2.75115e-06	0.286866	0.342	0.256	CTX	RUFY3	Human	0.0210148	4
2.77384e-07	0.283271	0.297	0.202	CTX	DCLRE1C	Human	0.00229953	4
5.75588e-07	0.278969	0.302	0.207	CTX	GRB2	Human	0.00568514	4
2.61677e-16	0.277578	0.1	0.016	CTX	SLC2A13	Human	9.61701e-13	4
1.20747e-09	0.275821	0.411	0.289	CTX	VCP	Human	0.0245745	4
3.41038e-06	0.275408	0.277	0.193	CTX	TOMM40	Human	0.0148475	4
4.11234e-07	0.274161	0.23	0.145	CTX	PDCD7	Human	0.012066	4
4.61932e-26	0.269103	0.101	0	CTX	FANCD2OS	Human	4.5224e-22	4
3.47106e-06	0.268854	0.305	0.217	CTX	NXT1	Human	0.0253892	4
1.96223e-06	0.266348	0.24	0.156	CTX	ABRACL	Human	0.0278881	4
1.21638e-07	0.265157	0.353	0.252	CTX	AFF4	Human	0.00492022	4
3.619e-07	0.260543	0.3	0.201	CTX	SUCLA2	Human	0.0111969	4
1.33309e-07	0.259935	0.169	0.091	CTX	PLAA	Human	0.00272871	4
9.70666e-08	0.259086	0.205	0.121	CTX	NCKAP1	Human	0.00230906	4
7.93211e-07	0.257537	0.254	0.165	CTX	DTL	Human	0.00649615	4
1.41346e-13	0.255866	0.113	0.03	CTX	RASSF8	Human	1.76671e-07	4
1.9717e-06	0.252403	0.212	0.135	CTX	ATF2	Human	0.00775237	4
2.15333e-07	0.249907	0.279	0.181	CTX	FAM107B	Human	0.0152989	4
9.2907e-08	0.249114	0.261	0.163	CTX	PPA2	Human	0.0113651	4
1.73233e-18	0.249106	0.11	0.016	CTX	ATXN1	Human	5.40603e-12	4
1.73746e-07	0.248239	0.162	0.087	CTX	MTFR1	Human	0.00062595	4
1.04315e-11	0.248238	0.161	0.065	CTX	ZBED4	Human	0.00135402	4
2.21497e-09	0.247891	0.189	0.096	CTX	TMTC4	Human	0.00201837	4
1.03284e-21	0.247436	0.115	0.012	CTX	ZNRF3	Human	1.00112e-12	4
1.55065e-09	0.246876	0.189	0.096	CTX	TBRG1	Human	0.00340536	4
5.49737e-17	0.244814	0.109	0.019	CTX	BOC	Human	3.86334e-10	4
1.27874e-06	0.244321	0.191	0.113	CTX	SLAIN2	Human	0.0063005	4
8.06245e-07	0.244276	0.136	0.071	CTX	GRIA3	Human	0.00306572	4
1.87332e-10	0.244148	0.127	0.048	CTX	ARG2	Human	7.82284e-06	4
3.24617e-12	0.243782	0.103	0.028	CTX	EML1	Human	1.34107e-05	4
6.43125e-08	0.243164	0.219	0.128	CTX	TRAP1	Human	0.00253996	4
7.79238e-09	0.241671	0.187	0.098	CTX	RABL6	Human	3.0452e-05	4
2.58726e-06	0.241295	0.205	0.129	CTX	CLSTN1	Human	0.013411	4
5.58792e-08	0.2411	0.219	0.131	CTX	NVL	Human	0.00249131	4
3.5871e-08	0.240836	0.129	0.058	CTX	KLF3	Human	0.00902555	4
6.84512e-09	0.240463	0.105	0.039	CTX	LRRTM3	Human	0.00022906	4
3.73228e-07	0.238817	0.212	0.126	CTX	DNA2	Human	0.00825377	4
2.51964e-09	0.238725	0.115	0.044	CTX	LRP11	Human	8.99989e-06	4
1.09467e-12	0.238466	0.109	0.03	CTX	SRD5A1	Human	2.62337e-05	4
8.63389e-10	0.238218	0.15	0.066	CTX	PRKCI	Human	0.00421993	4
2.37489e-06	0.237999	0.228	0.148	CTX	GPT2	Human	0.0223818	4
3.43407e-09	0.237986	0.164	0.079	CTX	EIF2B3	Human	0.0114618	4
2.7449e-17	0.237565	0.115	0.021	CTX	PARD6G	Human	1.80905e-10	4
1.12974e-09	0.237293	0.16	0.073	CTX	ZNF566	Human	0.00364296	4
3.05494e-07	0.237194	0.145	0.075	CTX	LMBRD1	Human	0.00140874	4
4.20043e-08	0.236815	0.123	0.055	CTX	DGKD	Human	0.000316872	4
1.12885e-07	0.236346	0.166	0.088	CTX	TMCO3	Human	0.0119414	4
5.17993e-11	0.235906	0.145	0.058	CTX	CUL4A	Human	1.26527e-05	4
8.18989e-09	0.235803	0.167	0.082	CTX	MYT1	Human	0.000448682	4
1.37511e-08	0.235373	0.171	0.086	CTX	ZDHHC17	Human	0.000170016	4
7.58113e-09	0.235198	0.11	0.043	CTX	SH3GL3	Human	0.000292354	4
3.22593e-07	0.235145	0.294	0.197	CTX	SNX2	Human	0.014081	4
8.04401e-08	0.234395	0.123	0.056	CTX	HIPK3	Human	0.000331204	4
2.7376e-10	0.234311	0.126	0.048	CTX	ATP11C	Human	1.04294e-06	4
5.76611e-10	0.233839	0.172	0.079	CTX	SS18L1	Human	0.000171853	4
3.02965e-08	0.233224	0.129	0.058	CTX	FAM210A	Human	0.00243499	4
1.41237e-08	0.233138	0.199	0.107	CTX	MPRIP	Human	0.000635902	4
4.01756e-11	0.232329	0.953	0.883	CTX	CKB	Human	1.02837e-06	4
7.70272e-15	0.23221	0.116	0.028	CTX	LRP8	Human	1.42369e-07	4
1.95188e-07	0.229922	0.13	0.063	CTX	MYSM1	Human	0.000871637	4
1.52855e-06	0.229881	0.148	0.081	CTX	GIPC1	Human	0.00566125	4
1.3144e-10	0.229686	0.156	0.067	CTX	TNKS2	Human	0.000826402	4
3.11792e-08	0.22963	0.196	0.107	CTX	GLUD1	Human	0.0183026	4
3.97896e-11	0.225958	0.124	0.044	CTX	GLS	Human	3.6086e-06	4
1.10899e-06	0.46267	0.318	0.235	CTX	CREB5	Human	0.00617603	3
2.70934e-06	0.374801	0.302	0.219	CTX	PLXNA2	Human	0.0130807	3
1.83203e-06	0.311409	0.197	0.121	CTX	THRA	Human	0.024918	3
1.19664e-07	0.29619	0.463	0.344	CTX	GPX1	Human	0.00486509	3
4.39341e-08	0.292793	0.278	0.177	CTX	NMT2	Human	0.00876673	3
6.23195e-07	0.280977	0.391	0.285	CTX	MPST	Human	0.0112742	3
1.59927e-06	0.274737	0.372	0.282	CTX	KPNA3	Human	0.0190646	3
4.80797e-07	0.272654	0.4	0.295	CTX	KLHDC2	Human	0.00474507	3
3.12902e-07	0.270252	0.264	0.172	CTX	RARS2	Human	0.00165585	3
3.12098e-09	0.268081	0.236	0.135	CTX	CTTNBP2NL	Human	0.0142007	3
9.96979e-07	0.266102	0.276	0.186	CTX	SMAP1	Human	0.0109412	3
4.88844e-07	0.265518	0.344	0.247	CTX	NT5C3A	Human	0.0110765	3
1.86134e-08	0.26484	0.296	0.187	CTX	SLC30A9	Human	0.0010512	3
9.19142e-10	0.262244	0.195	0.098	CTX	ICE2	Human	3.63635e-05	3
2.50344e-06	0.260776	0.336	0.247	CTX	HOOK3	Human	0.0327305	3
1.72974e-07	0.260368	0.247	0.154	CTX	HAGH	Human	0.0203512	3
8.04989e-07	0.259197	0.406	0.306	CTX	PGLS	Human	0.0123102	3
9.54992e-07	0.259011	0.364	0.265	CTX	SP3	Human	0.0130861	3
4.8904e-10	0.256853	0.246	0.135	CTX	CCNT2	Human	0.000980094	3
2.52556e-07	0.254592	0.385	0.278	CTX	ELAVL1	Human	0.0122065	3
1.72406e-06	0.254474	0.219	0.139	CTX	RNF180	Human	0.0277364	3
2.17668e-08	0.254381	0.799	0.743	CTX	RTN4	Human	0.00102888	3
5.31333e-07	0.254186	0.278	0.186	CTX	CDC27	Human	0.0224545	3
1.35663e-08	0.252651	0.26	0.156	CTX	SEC31A	Human	0.0174955	3
6.8581e-11	0.250961	0.177	0.081	CTX	WDR20	Human	0.00915285	3
7.51605e-08	0.249702	0.139	0.069	CTX	FAM162A	Human	0.0114762	3
7.91573e-09	0.249691	0.134	0.059	CTX	RRAGB	Human	0.00151816	3
1.86636e-08	0.249611	0.142	0.066	CTX	SLC1A3	Human	9.93147e-05	3
2.36319e-06	0.248823	0.305	0.21	CTX	USP48	Human	0.0134646	3
5.68199e-10	0.248312	0.147	0.063	CTX	ZFP30	Human	3.53191e-06	3
1.39535e-07	0.248134	0.235	0.143	CTX	BRD9	Human	0.00522129	3
1.5285e-06	0.247423	0.692	0.583	CTX	OST4	Human	0.0102016	3
3.85991e-07	0.247322	0.249	0.158	CTX	NUP54	Human	0.0043089	3
1.03421e-07	0.247064	0.175	0.094	CTX	PPWD1	Human	0.00236199	3
5.69978e-11	0.244628	0.122	0.043	CTX	PEX14	Human	6.24625e-05	3
1.77588e-10	0.244153	0.165	0.073	CTX	CHM	Human	1.82902e-06	3
9.97631e-08	0.243581	0.215	0.126	CTX	LIN9	Human	0.00496035	3
2.00721e-09	0.243558	0.165	0.078	CTX	CYFIP1	Human	0.000305544	3
1.4605e-09	0.242467	0.169	0.08	CTX	PARP11	Human	1.62535e-05	3
3.68314e-07	0.242402	0.189	0.109	CTX	MED31	Human	0.00249924	3
2.15158e-16	0.24131	0.104	0.018	CTX	USP54	Human	3.94832e-09	3
1.634e-08	0.240672	0.239	0.139	CTX	INTS12	Human	0.00767068	3
7.42453e-07	0.239543	0.148	0.079	CTX	TMOD3	Human	0.00787435	3
1.43944e-09	0.239518	0.139	0.059	CTX	VPS13A	Human	1.27487e-05	3
4.97793e-07	0.239366	0.283	0.189	CTX	CD47	Human	0.00369744	3
4.07471e-07	0.239361	0.243	0.153	CTX	GRAMD1A	Human	0.0187907	3
1.4548e-11	0.239026	0.119	0.039	CTX	GALNT11	Human	7.94261e-07	3
1.18915e-13	0.238985	0.12	0.033	CTX	EBF4	Human	5.90183e-10	3
3.85728e-08	0.237691	0.152	0.075	CTX	CCDC6	Human	0.000636511	3
2.05449e-06	0.23758	0.234	0.151	CTX	UBE2J2	Human	0.0113511	3
2.37609e-06	0.237396	0.285	0.199	CTX	SETD2	Human	0.0216452	3
4.59407e-12	0.237391	0.12	0.038	CTX	SIL1	Human	3.54445e-06	3
1.4806e-06	0.235927	0.22	0.137	CTX	EPS15L1	Human	0.00885114	3
7.19874e-07	0.235802	0.228	0.142	CTX	REV1	Human	0.00563309	3
4.94952e-11	0.235525	0.129	0.047	CTX	SLC35F5	Human	6.93577e-07	3
5.87758e-12	0.235394	0.113	0.033	CTX	TOM1L2	Human	1.37725e-05	3
1.06108e-07	0.235223	0.246	0.152	CTX	API5	Human	0.00719591	3
5.03644e-09	0.234969	0.128	0.054	CTX	GFM2	Human	0.000116615	3
1.23378e-08	0.23397	0.157	0.075	CTX	DCAF5	Human	0.000382137	3
3.72849e-10	0.232819	0.117	0.043	CTX	SLC39A9	Human	3.88787e-06	3
1.34779e-08	0.232663	0.147	0.07	CTX	GGA2	Human	0.000111843	3
8.85167e-08	0.232634	0.816	0.749	CTX	RTN3	Human	0.00893517	3
1.68449e-15	0.232297	0.103	0.019	CTX	SLC23A2	Human	2.0583e-11	3
2.29724e-10	0.23167	0.161	0.071	CTX	PI4KA	Human	5.0705e-05	3
1.2963e-08	0.231596	0.124	0.053	CTX	NEDD9	Human	0.000147983	3
1.55508e-08	0.231477	0.281	0.175	CTX	RNF13	Human	0.00409159	3
2.66658e-07	0.229844	0.138	0.07	CTX	SGPL1	Human	0.00149189	3
7.21123e-09	0.228941	0.336	0.215	CTX	PITPNB	Human	0.0149535	3
1.64049e-08	0.228575	0.14	0.065	CTX	PDZD8	Human	0.000306821	3
2.73063e-07	0.228126	0.166	0.09	CTX	SPG11	Human	0.00135667	3
3.01057e-06	0.227489	0.272	0.185	CTX	GPC2	Human	0.0275385	3
7.20659e-08	0.538077	0.176	0.099	CTX	BCAN	Human	0.000741627	2
8.02214e-19	0.510077	0.104	0.013	CTX	NEUROD6	Human	2.39065e-14	2
2.90591e-06	0.393464	0.47	0.425	CTX	MAP4K4	Human	0.0222719	2
1.19077e-12	0.362353	0.101	0.026	CTX	DSCAML1	Human	4.85916e-06	2
4.319e-07	0.355886	0.743	0.686	CTX	DLX2	Human	0.00354995	2
1.73068e-07	0.342896	0.295	0.195	CTX	SERINC5	Human	0.015119	2
2.94255e-06	0.324733	0.363	0.278	CTX	CTBP2	Human	0.0288472	2
1.55316e-07	0.322551	0.324	0.228	CTX	IVNS1ABP	Human	0.0230847	2
8.99514e-07	0.313964	0.382	0.298	CTX	PABPN1	Human	0.00717736	2
7.25012e-13	0.313554	0.396	0.254	CTX	EIF4A3	Human	0.0233741	2
3.77869e-09	0.306402	0.741	0.665	CTX	PRDX1	Human	0.000216253	2
1.62294e-06	0.300484	0.396	0.305	CTX	WAC	Human	0.0326979	2
1.413e-07	0.296884	0.51	0.435	CTX	SMARCA4	Human	0.0162725	2
2.44235e-06	0.296603	0.761	0.635	CTX	BTG1	Human	0.0310263	2
3.15415e-07	0.291712	0.364	0.257	CTX	CHD2	Human	0.00276225	2
7.95164e-07	0.289729	0.454	0.347	CTX	HSPA9	Human	0.00581207	2
2.66476e-09	0.287948	0.506	0.377	CTX	RAB1A	Human	0.000725371	2
2.938e-06	0.284167	0.343	0.248	CTX	NENF	Human	0.0313469	2
2.61682e-07	0.283659	0.364	0.253	CTX	CGGBP1	Human	0.00186297	2
3.9966e-07	0.280171	0.358	0.26	CTX	CMSS1	Human	0.0246889	2
4.71862e-12	0.277229	0.155	0.06	CTX	KDM6B	Human	8.57056e-05	2
2.12778e-06	0.276322	0.222	0.148	CTX	RORB	Human	0.0347979	2
2.78805e-06	0.275969	0.21	0.135	CTX	PABPC4	Human	0.020249	2
1.47734e-06	0.275862	0.346	0.257	CTX	SESTD1	Human	0.0134262	2
6.80271e-17	0.27351	0.117	0.024	CTX	ANKH	Human	2.43742e-06	2
5.67898e-07	0.272036	0.233	0.149	CTX	TRIM59	Human	0.0214089	2
2.51318e-07	0.2698	0.176	0.097	CTX	TP53	Human	0.00178473	2
1.42906e-06	0.26832	0.13	0.069	CTX	POLR3D	Human	0.0103247	2
2.95643e-09	0.266675	0.211	0.114	CTX	FGFR1	Human	0.0149081	2
3.86387e-10	0.266499	0.208	0.107	CTX	MORC3	Human	3.95248e-05	2
1.95128e-06	0.265234	0.156	0.088	CTX	EGFR	Human	0.020838	2
2.80858e-07	0.263362	0.448	0.337	CTX	EXOC5	Human	0.00605701	2
7.09688e-07	0.262452	0.357	0.254	CTX	MRPL41	Human	0.00860372	2
5.78656e-16	0.26199	0.131	0.033	CTX	SCML2	Human	2.28366e-11	2
2.23797e-07	0.260172	0.155	0.082	CTX	SURF4	Human	0.00166602	2
2.5999e-06	0.259723	0.306	0.217	CTX	PHF20L1	Human	0.0341547	2
1.36792e-07	0.257266	0.548	0.431	CTX	SERP1	Human	0.0149745	2
1.51134e-06	0.255982	0.22	0.139	CTX	SRFBP1	Human	0.0148156	2
2.06774e-11	0.255957	0.117	0.038	CTX	MED12L	Human	7.02341e-07	2
1.33941e-06	0.255907	0.258	0.174	CTX	AAK1	Human	0.0332628	2
5.68925e-07	0.255257	0.157	0.086	CTX	TUSC2	Human	0.00674164	2
9.82453e-07	0.254625	0.329	0.23	CTX	DNM1L	Human	0.0100561	2
9.61623e-09	0.252999	0.101	0.038	CTX	MDFI	Human	9.21728e-05	2
1.3713e-06	0.252331	0.328	0.232	CTX	SUMO3	Human	0.0308828	2
2.8293e-06	0.252256	0.376	0.282	CTX	TFG	Human	0.0222344	2
1.63842e-11	0.251506	0.126	0.043	CTX	TMEM106B	Human	2.18089e-07	2
7.16187e-08	0.250828	0.301	0.196	CTX	MPHOSPH6	Human	0.00158963	2
1.93463e-06	0.249413	0.276	0.185	CTX	PGM2L1	Human	0.015625	2
3.07854e-13	0.24809	0.107	0.027	CTX	DNAJC13	Human	2.24246e-09	2
4.44614e-07	0.248017	0.173	0.095	CTX	MED27	Human	0.00393664	2
2.57597e-26	0.247648	0.105	0.001	CTX	AS3MT	Human	5.10794e-22	2
4.56885e-08	0.247552	0.122	0.054	CTX	DUOX1	Human	0.000571614	2
3.51093e-06	0.247124	0.559	0.455	CTX	SH3BGRL3	Human	0.0445444	2
1.7476e-12	0.247095	0.104	0.028	CTX	MTHFD1L	Human	5.93442e-05	2
3.08586e-08	0.246972	0.193	0.105	CTX	MIER1	Human	0.00023113	2
1.50557e-06	0.246639	0.38	0.278	CTX	SPEN	Human	0.0123457	2
6.54109e-07	0.246562	0.224	0.137	CTX	TPM1	Human	0.00709708	2
3.23447e-08	0.246042	0.138	0.065	CTX	E2F7	Human	0.000229851	2
7.51387e-10	0.245864	0.135	0.055	CTX	PTRH2	Human	5.36976e-06	2
3.26948e-11	0.245807	0.125	0.044	CTX	DROSHA	Human	5.62335e-07	2
3.4422e-06	0.245732	0.422	0.323	CTX	ZNF644	Human	0.0350873	2
3.90081e-08	0.245709	0.17	0.088	CTX	USP42	Human	0.000280027	2
7.92229e-08	0.245654	0.383	0.271	CTX	SRPK1	Human	0.00886709	2
2.57177e-06	0.245479	0.293	0.198	CTX	GGCT	Human	0.0362545	2
4.96814e-13	0.24495	0.119	0.034	CTX	ANKRD44	Human	1.39805e-07	2
1.27473e-06	0.244777	0.2	0.123	CTX	WDR60	Human	0.0161244	2
2.66303e-17	0.244528	0.104	0.016	CTX	ST8SIA1	Human	2.50307e-13	2
4.09793e-14	0.243846	0.134	0.039	CTX	ZFHX2	Human	2.93169e-10	2
9.10568e-07	0.243666	0.234	0.149	CTX	GID8	Human	0.0064871	2
1.61875e-07	0.24327	0.169	0.091	CTX	INTS6	Human	0.00114919	2
8.25484e-12	0.242848	0.149	0.056	CTX	PXDN	Human	2.46812e-07	2
1.11152e-07	0.242654	0.842	0.762	CTX	HNRNPU	Human	0.00079034	2
3.88885e-08	0.241556	0.141	0.068	CTX	OSBPL11	Human	0.000301929	2
1.41491e-08	0.241396	0.358	0.24	CTX	CHD1	Human	0.0151534	2
6.07899e-07	0.241203	0.231	0.145	CTX	SUDS3	Human	0.0248928	2
1.44226e-08	0.241076	0.211	0.117	CTX	VPS13C	Human	0.00163206	2
1.04974e-06	0.240582	0.268	0.178	CTX	PPIP5K2	Human	0.0081627	2
4.01912e-12	0.240279	0.152	0.057	CTX	PTK7	Human	3.60281e-08	2
7.14381e-08	0.240269	0.146	0.073	CTX	HK1	Human	0.00099564	2
5.86817e-12	0.239802	0.135	0.047	CTX	PAPOLG	Human	2.68242e-07	2
1.01238e-15	0.239545	0.121	0.029	CTX	FOXK1	Human	1.11894e-06	2
2.42444e-06	0.239268	0.34	0.245	CTX	SPIN1	Human	0.0235877	2
8.20709e-07	0.239258	0.292	0.2	CTX	TTC1	Human	0.02087	2
1.33522e-09	0.239158	0.688	0.498	CTX	SF3B6	Human	2.17072e-05	2
3.43053e-07	0.238993	0.208	0.125	CTX	PLEKHA3	Human	0.00837254	2
3.21644e-06	0.237697	0.34	0.24	CTX	MSH2	Human	0.0289321	2
2.11036e-09	0.237438	0.16	0.074	CTX	DMXL2	Human	1.53104e-05	2
9.0261e-12	0.237177	0.101	0.028	CTX	MCM9	Human	9.59786e-08	2
5.38817e-07	0.236642	0.152	0.081	CTX	DZIP1	Human	0.00382534	2
3.8888e-08	0.236482	0.12	0.052	CTX	HMGXB3	Human	0.000386468	2
7.01774e-15	0.236228	0.113	0.026	CTX	MSH5	Human	2.37852e-09	2
1.587e-09	0.236048	0.243	0.136	CTX	RNF34	Human	0.00962406	2
2.022e-08	0.235906	0.208	0.115	CTX	HMGCR	Human	0.00139066	2
3.05482e-06	0.235285	0.715	0.615	CTX	SEC61B	Human	0.026946	2
1.18594e-09	0.234907	0.135	0.056	CTX	GALK2	Human	0.000227576	2
1.7154e-06	0.234676	0.214	0.134	CTX	PRKD3	Human	0.0187554	2
1.00015e-09	0.234633	0.109	0.039	CTX	ARMCX4	Human	7.1799e-06	2
9.38976e-07	0.234509	0.166	0.094	CTX	MAD1L1	Human	0.00668022	2
4.86588e-09	0.23441	0.16	0.076	CTX	PCGF3	Human	0.000121619	2
2.48249e-06	0.23421	0.193	0.117	CTX	HRAS	Human	0.0373624	2
1.63186e-09	0.233495	0.161	0.075	CTX	EPS15	Human	3.44085e-05	2
1.42825e-06	0.233056	0.219	0.138	CTX	VPS4A	Human	0.0108791	2
8.14394e-08	0.232882	0.182	0.099	CTX	PIGU	Human	0.000891572	2
1.68626e-07	0.232779	0.153	0.078	CTX	HOOK2	Human	0.0171844	2
2.89855e-08	0.232662	0.183	0.098	CTX	NAA35	Human	0.00122645	2
5.96931e-09	0.232383	0.185	0.095	CTX	UIMC1	Human	0.000102842	2
4.56149e-08	0.231776	0.136	0.064	CTX	ZNF569	Human	0.00437798	2
2.94205e-07	0.231369	0.206	0.122	CTX	MAP3K7	Human	0.00218795	2
3.61643e-13	0.230855	0.103	0.025	CTX	WDR35	Human	1.28132e-07	2
3.30798e-10	0.230502	0.106	0.035	CTX	CPD	Human	8.00428e-06	2
9.11717e-13	0.230293	0.13	0.041	CTX	FCF1	Human	2.30977e-08	2
1.09811e-06	0.230183	0.233	0.147	CTX	UGDH	Human	0.0120141	2
8.41094e-09	0.229847	0.167	0.083	CTX	SORT1	Human	0.0207431	2
1.20065e-08	0.229179	0.182	0.094	CTX	KNTC1	Human	0.00097313	2
1.87165e-09	0.228817	0.124	0.05	CTX	UBE2O	Human	1.35348e-05	2
5.84952e-15	0.228723	0.104	0.021	CTX	TOM1L1	Human	1.8339e-09	2
4.70906e-11	0.228628	0.107	0.033	CTX	HIVEP1	Human	3.34807e-07	2
7.07715e-08	0.228581	0.178	0.095	CTX	ARFIP1	Human	0.000800287	2
2.85464e-10	0.228152	0.164	0.073	CTX	PIK3C3	Human	0.000860813	2
6.09185e-07	0.227185	0.173	0.097	CTX	DIAPH1	Human	0.00440665	2
3.32399e-13	0.227083	0.107	0.027	CTX	ZNF251	Human	2.36517e-09	2
2.13828e-07	0.226685	0.185	0.104	CTX	HDAC5	Human	0.00168524	2
8.67626e-07	0.225793	0.17	0.096	CTX	DNAJB14	Human	0.0116284	2
1.05364e-07	0.224798	0.143	0.071	CTX	EXT2	Human	0.000760633	2
1.08174e-08	0.223566	0.183	0.095	CTX	FAM168B	Human	0.00209656	2
3.0781e-07	0.529485	0.331	0.242	CTX	NR2F1	Human	0.00437028	1
3.03714e-06	0.506048	0.258	0.181	CTX	PLS3	Human	0.0431213	1
2.53197e-24	0.43617	0.109	0.006	CTX	EYA2	Human	3.59489e-20	1
1.9441e-06	0.401869	0.115	0.057	CTX	CALB2	Human	0.0276023	1
2.95359e-07	0.366306	0.186	0.108	CTX	HES1	Human	0.0041935	1
3.43787e-06	0.362189	0.325	0.242	CTX	KIDINS220	Human	0.0488109	1
9.97398e-08	0.358007	0.316	0.213	CTX	CAMK2N1	Human	0.00141611	1
1.17071e-06	0.350199	0.484	0.425	CTX	TRA2A	Human	0.0166218	1
1.42475e-06	0.323235	0.503	0.432	CTX	TOP1	Human	0.0202285	1
1.81697e-06	0.321037	0.3	0.215	CTX	EFCAB2	Human	0.0257973	1
2.78648e-06	0.31828	0.267	0.189	CTX	NFIX	Human	0.0395624	1
7.10898e-09	0.31675	0.344	0.231	CTX	MRPS26	Human	0.000100933	1
8.58745e-08	0.314778	0.277	0.182	CTX	PHYHIPL	Human	0.00121925	1
4.22222e-07	0.313435	0.436	0.345	CTX	USP47	Human	0.00599471	1
9.17304e-07	0.312825	0.178	0.107	CTX	ZHX2	Human	0.0130239	1
1.10537e-06	0.304807	0.262	0.176	CTX	COMMD1	Human	0.0156941	1
7.93956e-07	0.304722	0.25	0.167	CTX	CRK	Human	0.0112726	1
3.62068e-07	0.302127	0.3	0.208	CTX	NUP107	Human	0.00514065	1
2.22228e-13	0.301869	0.171	0.066	CTX	RAB3GAP2	Human	3.1552e-09	1
8.15788e-08	0.296937	0.201	0.118	CTX	UBE2J1	Human	0.00115826	1
2.03239e-17	0.295683	0.113	0.02	CTX	SPRED2	Human	2.88559e-13	1
5.08234e-07	0.290131	0.166	0.094	CTX	SMARCD3	Human	0.0072159	1
1.42883e-11	0.288508	0.185	0.082	CTX	POLB	Human	2.02865e-07	1
3.60396e-15	0.287913	0.106	0.022	CTX	PUS7	Human	5.11691e-11	1
4.06861e-08	0.286693	0.351	0.237	CTX	RCN1	Human	0.000577662	1
1.17905e-07	0.285621	0.271	0.176	CTX	ISCA1	Human	0.00167402	1
2.91478e-06	0.284493	0.457	0.364	CTX	FBXO21	Human	0.041384	1
8.43909e-08	0.281523	0.225	0.135	CTX	LARP1B	Human	0.00119818	1
7.74369e-09	0.28072	0.245	0.144	CTX	PPP2CB	Human	0.000109945	1
3.31148e-06	0.280664	0.187	0.115	CTX	RASD1	Human	0.0470164	1
1.54067e-06	0.27995	0.274	0.184	CTX	APLP1	Human	0.0218745	1
1.9942e-06	0.279507	0.237	0.155	CTX	RNF187	Human	0.0283137	1
1.15718e-06	0.278517	0.235	0.153	CTX	RGMA	Human	0.0164296	1
2.93841e-08	0.27837	0.276	0.176	CTX	ZFYVE16	Human	0.000417195	1
5.42226e-09	0.276751	0.188	0.099	CTX	TCAIM	Human	7.69852e-05	1
8.89475e-11	0.276451	0.192	0.092	CTX	RNF2	Human	1.26288e-06	1
2.58923e-10	0.27452	0.157	0.069	CTX	DHX57	Human	3.67619e-06	1
8.85428e-10	0.273978	0.254	0.144	CTX	POLK	Human	1.25713e-05	1
2.6936e-06	0.273406	0.517	0.419	CTX	RHOBTB3	Human	0.0382438	1
1.46286e-06	0.273177	0.385	0.283	CTX	ATP6V0E1	Human	0.0207697	1
1.16045e-07	0.272952	0.251	0.156	CTX	MXI1	Human	0.00164761	1
1.73808e-18	0.272936	0.129	0.026	CTX	JADE3	Human	2.46772e-14	1
1.8035e-06	0.27272	0.618	0.524	CTX	ARL6IP6	Human	0.0256061	1
5.34703e-10	0.272101	0.37	0.234	CTX	DPYSL4	Human	7.59171e-06	1
3.4566e-06	0.271976	0.259	0.176	CTX	ZFHX4	Human	0.0490769	1
1.88542e-17	0.27184	0.132	0.03	CTX	RNFT2	Human	2.67693e-13	1
7.40385e-07	0.271698	0.418	0.318	CTX	TSG101	Human	0.010512	1
4.01202e-07	0.271574	0.258	0.166	CTX	SLC44A1	Human	0.00569626	1
6.61709e-07	0.271254	0.483	0.387	CTX	ZFAND6	Human	0.00939495	1
1.83301e-06	0.270689	0.333	0.243	CTX	MAP4	Human	0.026025	1
5.40497e-11	0.269832	0.239	0.126	CTX	KLHL8	Human	7.67398e-07	1
1.02213e-09	0.267864	0.202	0.104	CTX	CYB5R4	Human	1.45121e-05	1
1.06408e-06	0.266607	0.284	0.194	CTX	CREBBP	Human	0.0151077	1
1.2095e-06	0.266311	0.582	0.472	CTX	PFDN4	Human	0.0171725	1
1.25592e-07	0.266181	0.304	0.203	CTX	AK3	Human	0.00178316	1
1.24811e-09	0.265491	0.18	0.089	CTX	PREPL	Human	1.77207e-05	1
5.02006e-09	0.264526	0.209	0.115	CTX	LRRC41	Human	7.12748e-05	1
1.27513e-06	0.264262	0.556	0.457	CTX	NAP1L4	Human	0.0181042	1
2.05289e-11	0.263968	0.171	0.074	CTX	PLXNC1	Human	2.91469e-07	1
2.99164e-07	0.26349	0.212	0.125	CTX	ZGRF1	Human	0.00424753	1
3.19088e-08	0.262132	0.17	0.088	CTX	ZC3H6	Human	0.000453041	1
3.59634e-12	0.261891	0.137	0.049	CTX	MED15	Human	5.10609e-08	1
6.67156e-07	0.259228	0.19	0.113	CTX	WDR43	Human	0.00947228	1
9.71228e-07	0.258676	0.277	0.186	CTX	MRPS36	Human	0.0137895	1
7.62183e-09	0.258609	0.29	0.18	CTX	HIPK2	Human	0.000108215	1
2.24954e-06	0.257561	0.288	0.2	CTX	OCIAD2	Human	0.031939	1
4.16371e-07	0.256398	0.283	0.187	CTX	GRSF1	Human	0.00591163	1
1.72499e-06	0.255242	0.715	0.644	CTX	CCT8	Human	0.0244914	1
2.11697e-06	0.255228	0.25	0.165	CTX	GPC1	Human	0.0300568	1
1.59274e-06	0.2551	0.487	0.389	CTX	UBE2B	Human	0.0226137	1
[truncated: 2,839 more rows]
