# Supplementary material for: Cortical arealization of interneurons defines shared and distinct molecular programs in developing human and macaque brains
Source: Research Square preprint supplement (doi:10.21203/rs.3.rs-3939272/v1), 2024-02-26
Supplement: Supplementary file 10 [file e6ad43572306ba5d13097821.xlsx]

## Sheet: fetal_human_pct.exp
Table S2. The expression percentages of inhibitory marker genes in fetal human, fetal macaque and adult primate subtype cells.
Fetal human
	FOXJ1	CRYAB	HOPX	HMGA2	NKX6-2	OLIG1	NRG1	DLK1	SOX5	GPX1	SFRP2	CCND2	PAK3	ARX	OLIG2	ASCL1	DLX1	DLX2	DLX5	GADD45G	GAD2	GSX1	PAX6	GSX2	GAD1	LHX6	MAF	MAFB	NKX2-1	CRABP1	TAC1	TAC3	SST	NPY	RELN	GUCY1A2	LHX8	ZIC1	DCN	CCK	PVALB	SOX6	SATB1	ST18	NR2F1	NR2F2	PROX1	SP8	CRH
GE Ependymal FOXJ1	34.5133	23.8938	15.0442	3.53982	0	8.84956	3.53982	0.884956	31.8584	64.6018	66.3717	46.9027	15.0442	5.30973	12.3894	32.7434	3.53982	13.2743	7.07965	2.65487	4.42478	0.884956	36.2832	8.84956	0	1.76991	11.5044	10.6195	12.3894	1.76991	2.65487	0	4.42478	3.53982	0	7.07965	0	42.4779	13.2743	0	0	30.9735	10.6195	0	62.8319	36.2832	10.6195	0	0
GE RG CRYAB	8.81459	49.2401	47.5177	1.31712	0	5.16717	13.3739	0.303951	32.1175	62.2087	37.1834	49.848	12.462	11.0436	1.51976	18.845	29.4833	10.233	24.924	3.24215	4.35664	0.405268	58.7639	1.41844	8.308	6.88956	6.88956	2.73556	0.303951	11.6515	3.44478	1.62107	3.34347	3.74873	0.202634	2.53293	0	13.0699	2.22898	0.506586	0.303951	49.9493	14.7923	1.31712	45.1874	13.4752	5.06586	0.911854	2.9382
GE RG HMGA2 NR2F2	8.90625	3.125	18.125	38.125	0.625	12.0312	10.7812	3.59375	27.9688	60.1562	54.2188	75.9375	22.0312	16.5625	23.4375	45.625	26.5625	31.5625	9.375	20.4688	14.375	0.625	54.375	22.5	3.59375	1.5625	4.84375	5	19.2188	2.5	6.40625	0.46875	10.1562	27.6562	1.09375	2.5	1.71875	9.84375	0.78125	0.3125	0	32.9688	10.4688	0.9375	70	36.7188	4.0625	0	3.4375
GE RG HOPX NRG1	7.84182	15.1977	32.3727	3.40147	0.536193	5.01005	30.9987	0.502681	41.5047	44.4705	27.2788	52.9155	16.002	14.0583	5.68029	20.2748	23.8773	25.067	18.884	10.0369	20.4424	1.20643	24.9832	4.28954	9.24933	3.85389	2.02748	4.5744	5.51273	3.66957	3.43499	3.23391	3.68633	7.75804	1.44102	4.60791	0.318365	6.46783	0.619973	0.234584	0	46.3639	8.12668	2.06099	26.374	9.50067	2.94906	1.42426	3.70308
GE RG NKX2-1 OLIG1	5.59284	2.79642	7.82998	33.2215	3.46756	49.8881	7.82998	12.7517	39.9329	71.5884	51.1186	70.4698	18.7919	8.16555	43.5123	57.1588	34.4519	38.4787	14.5414	21.2528	20.3579	2.46085	12.528	38.0313	4.58613	2.68456	5.92841	4.36242	51.4541	4.1387	6.15213	0.671141	19.2394	28.1879	1.78971	2.90828	2.12528	21.7002	1.00671	0.223714	0.111857	28.6353	7.27069	1.34228	38.5906	19.9105	0.671141	0.111857	0.782998
GE RG SOX5	1.35318	2.48083	1.62382	2.39062	1.39829	26.7028	15.0654	0.135318	65.7645	37.6635	40.0992	68.1101	40.6405	24.1768	21.2449	30.6721	31.7997	34.7767	16.2382	16.1931	23.41	1.44339	5.00677	17.5462	15.9224	5.09698	1.62382	4.55571	24.4475	2.43572	1.89445	3.0221	2.52594	11.7727	1.08254	6.35995	0.045106	2.52594	0.541272	0.135318	0.090212	48.2634	5.36761	3.56337	17.1854	6.54037	1.98466	1.5336	0.315742
inIPC ASCL1 DLX1	0.450831	1.88222	1.21443	6.33136	0.121161	9.08988	8.38828	0.755142	34.483	35.0578	14.1533	70.3184	38.7264	38.0671	13.5137	50.665	73.3841	72.3781	61.3243	39.7999	62.6148	6.93435	12.6768	7.96844	22.7163	8.51507	2.61764	8.31502	18.8926	3.20654	2.81206	12.4796	6.86672	23.9786	0.932657	5.11975	0.61144	3.73908	0.166244	0.233869	0.0112708	36.1905	9.1406	14.9732	24.6633	12.6092	7.97971	6.42434	0.222598
inIPC ASCL1 GADD45G	1.02896	2.21037	3.20122	0.533537	0.0381098	10.2896	5.14482	0.152439	16.311	43.1402	14.9009	75.4573	34.9848	34.4893	14.2149	55.0686	73.0945	79.9543	70.8079	61.9284	65.3582	7.66006	22.904	14.0244	22.1799	6.6311	2.97256	13.529	17.6448	6.21189	2.13415	6.51677	6.93598	27.3628	0.190549	1.52439	0.304878	0.685976	0.266768	0.228659	0	17.7591	7.4314	8.11738	21.6082	7.66006	6.66921	1.79116	0.685976
inIPC ASCL1 SFRP2 OLIG1	1.5973	3.71558	2.79956	11.1868	0.332055	14.7993	13.1505	0.543883	44.4667	43.5507	36.6462	68.472	42.6347	34.1558	21.4805	62.6381	64.6762	63.9377	45.0049	36.9039	48.9208	4.26519	23.5988	9.35478	16.4596	6.59529	2.54194	12.3147	13.9635	3.61825	2.76521	8.03801	4.74609	22.0416	1.12212	7.41398	0.440831	5.17547	0.32633	0.148852	0.0343505	37.2875	11.7421	9.69829	36.0623	16.0818	6.30904	7.1449	0.223278
InN LHX6 MAF	0.059742	2.08613	1.36115	0.973633	0.0419809	0.526375	7.0221	1.16901	20.1411	30.0212	1.46449	20.7353	32.8565	52.0627	0.721748	22.9894	46.9265	63.3249	68.1704	22.8683	42.5944	0.351993	1.62757	2.47687	44.2963	33.3635	30.2682	23.2203	6.66527	2.62542	5.09906	2.06998	22.9781	7.03018	1.23359	5.5221	1.7309	1.20937	1.38052	1.64856	0.00807324	41.9179	16.7326	2.99517	14.2977	5.51241	5.75945	0.858993	0.266417
InN LHX6 MAF DCN	0.0830306	3.29009	3.31085	1.83705	0	1.01713	31.8007	0.0518941	24.328	21.4946	1.05864	11.4478	56.6373	58.9933	0.757654	16.2844	24.8469	29.6731	26.466	9.25791	46.5802	0.0830306	1.32849	0.0103788	65.1271	34.603	43.8298	36.741	0.145304	1.26622	19.7094	3.59107	38.7857	9.7561	25.8537	29.0815	0.145304	0.384017	19.0763	12.7452	0.0726518	76.8137	17.3742	2.42865	25.8433	6.42449	3.03062	0.342501	1.85781
InN LHX6 SST NPY	0.0993323	2.00872	1.76591	1.30236	0.121406	0.673252	7.87484	1.44032	15.6228	33.0445	1.50102	24.8827	34.8711	50.3891	1.63898	21.9911	50.676	58.7606	61.7405	18.5365	48.9929	1.60035	1.72728	1.52309	49.4123	34.4186	35.1802	30.9199	11.9309	2.56057	14.8557	12.6373	59.7925	19.6568	4.75691	8.75779	1.76039	1.13128	7.5327	5.60124	0.0220738	52.2377	29.5458	5.18183	27.6696	13.5864	4.13333	0.938138	0.226257
InN LHX6 SST NPY-	0.0833056	4.48184	2.98234	0.0499833	0	0.8997	1.14962	0.0333222	4.7984	31.8394	0.533156	12.3459	25.9747	33.8054	0.566478	12.2459	41.8527	46.6511	42.4025	14.9284	36.5045	0.0833056	2.34922	0.366544	39.7368	30.3066	36.2879	51.7161	1.31623	0.916361	17.7607	3.14895	50.6998	11.5961	6.38121	5.11496	0.0333222	0.166611	16.2113	4.14862	0.0833056	28.1406	29.007	0.783072	21.6594	8.68044	4.4985	1.76608	1.01633
InN LHX6 GUCY1A2	0	2.74314	4.42643	1.80798	0	1.18454	25.4364	0.0623441	24.7506	11.8454	0.311721	7.98005	52.8678	39.0898	0.810474	3.61596	8.41646	5.798	8.29177	3.11721	45.3865	0.0623441	0.498753	0	61.9077	29.3017	21.8828	20.8853	0	0.498753	26.0599	5.3616	14.7756	12.0948	10.4738	38.2793	0	0.561097	11.9701	20.5736	0.124688	64.4015	0.0623441	1.18454	22.8803	1.68329	1.18454	0.0623441	1.74564
InN LHX6 LAMP5 NOS1	0.398406	20.7171	5.17928	4.38247	0	3.58566	48.6056	0	45.0199	20.3187	0.796813	23.506	76.8924	33.0677	1.59363	12.749	18.3267	7.17131	10.3586	2.39044	68.9243	0	0.796813	0	68.9243	35.4582	56.5737	13.5458	0.398406	30.2789	31.0757	4.38247	37.0518	15.5378	17.5299	41.4343	0	1.59363	2.39044	82.8685	0	65.3386	0	2.78884	27.8884	1.99203	15.9363	0	15.9363
InN LHX6 LHX8	0.225734	0.275897	0.526712	8.07625	0.451467	2.93454	39.1021	16.002	41.9614	31.2265	3.21043	4.38927	44.3943	64.6852	3.13519	16.8046	32.7314	50.6145	51.6679	20.7926	48.3822	0.50163	2.18209	0	53.9002	36.2679	3.36092	11.8886	2.90946	4.13845	7.44921	2.23225	8.35214	0.551793	5.19187	9.07951	49.7868	24.3792	0.0752445	2.18209	0	79.8846	24.1786	16.5789	16.3531	11.1613	5.19187	1.47981	0.100326
InN LHX6 NKX2-1	0.139828	0.990445	0.675833	0.291307	0.0233046	1.03705	1.68958	1.86437	18.7485	30.028	2.84316	37.2407	29.1657	43.8243	2.07411	22.8502	59.3451	80.5989	80.8203	31.6243	63.9361	1.5381	1.22349	4.18317	40.7947	30.2727	7.76043	18.2358	42.7406	3.787	3.0529	14.9615	13.9361	14.0527	0.139828	1.31671	1.56141	1.04871	0.15148	0.104871	0	47.3899	11.9786	6.56024	12.3281	7.15451	9.26357	1.57306	0.186437
InN LHX6 NKX2-1 CRABP1 TAC3	0.0862069	1.49425	1.26437	0	0	0.574713	0.862069	3.90805	13.9943	30.977	1.63793	28.3621	31.2644	46.7241	1.89655	12.1839	50.8621	76.523	73.6207	34.3103	65.8046	0.948276	1.75287	1.14943	38.2759	27.9598	12.9885	26.8391	50.1149	20.5172	2.29885	15.6609	7.38506	8.41954	0.172414	1.6092	0.287356	0.775862	0.632184	2.24138	0	47.1264	10.9195	18.4483	15.3161	8.07471	19.9138	1.86782	0.172414
InN LHX6 NKX2-1 CRABP1 TAC3-	0.180099	2.07114	1.37326	0.0450248	0	0.495272	1.41828	0.652859	11.4813	34.624	1.57587	23.3679	33.7461	43.7641	1.48582	12.4043	52.3413	71.7244	68.1	39.4417	54.8176	0.360198	2.83656	2.09365	42.8411	35.457	20.4412	25.8667	40.7474	56.8213	5.51553	4.09725	11.6164	8.7348	0.292661	3.44439	0.540297	1.62089	0.427735	3.2643	0	45.1373	13.665	23.8856	18.6628	11.1211	26.4295	2.16119	0.157587
InN LHX6 NKX2-1 LHX8 ZIC1	0.180325	0.300541	0.480866	5.36967	0.400721	2.08375	30.0541	13.6245	36.9265	35.2635	2.08375	5.46985	46.4837	50.5911	1.5027	10.559	27.5496	38.5895	49.9299	21.5989	39.992	0.240433	2.24404	0.420757	50.3506	32.0577	1.0018	9.57724	16.3294	27.4494	13.8048	1.70307	5.1092	1.02184	12.8832	9.39691	68.7237	54.7385	0.0601082	0.941695	0.0200361	43.5985	13.0234	14.2256	6.8323	3.90703	4.24765	1.40252	0.160289
InN NR2F2 SP8	0.0638244	4.48898	1.93601	0.0893541	0.0170198	0.353161	3.09761	0.0127649	14.5817	30.4357	1.38286	37.8904	33.1972	48.6512	0.54038	22.5087	70.9727	67.2113	77.4487	38.1585	49.4766	0.127649	12.7479	1.18713	18.9175	1.88069	2.44235	16.973	0.578674	1.40839	0.412731	0.816952	2.30193	3.39546	0.561654	4.93575	0.00425496	0.114884	0.868011	3.81244	0	13.986	10.7778	6.7824	52.0381	55.9144	34.9077	19.0367	1.31478
InN NR2F2 SP8 CRH DCN	0	4.44444	5.55556	0	0	1.11111	0.666667	0	10.2222	28.6667	0.444444	21.5556	33.1111	12	0.444444	24.8889	50.4444	23.1111	30.6667	14.8889	32	0	7.77778	0	43.5556	1.33333	17.5556	12.6667	0	14.6667	0.888889	0.444444	24.2222	5.11111	13.5556	6.44444	0	0.222222	21.3333	62	0	2.66667	7.11111	0.444444	50.8889	52.8889	26.2222	17.5556	38.8889
InN NR2F2 SP8 SATB1	0.0558451	1.82427	1.67535	4.3373	0.0930752	0.930752	38.105	0.390916	83.7305	39.3336	7.57632	22.9523	91.0648	87.4535	1.71258	59.0283	71.5562	82.3343	89.5383	46.5748	89.65	0.316456	32.1854	0.0930752	72.3753	3.10871	6.8131	17.0886	0.297841	0.483991	1.54505	1.43336	2.77364	7.14818	6.38496	23.4736	0.335071	0.986597	1.93596	3.2204	0	68.1869	37.4907	42.3306	82.6136	83.7305	42.07	45.6813	0.335071
InN NR2F2 SP8- VIP-	0.0769777	2.19683	1.25533	3.32189	0.426338	1.75865	18.2793	7.07603	37.198	23.7328	2.06063	19.2977	39.3415	30.6608	2.1613	19.1497	47.9927	46.2636	52.6942	26.96	40.5673	1.60469	6.83918	0.609901	26.3027	4.80815	3.20346	8.65703	1.0244	2.81265	1.97181	1.48626	4.81999	3.991	3.19162	7.06419	1.81786	4.29891	0.971104	5.41805	0.0592136	25.3257	7.8991	14.4363	43.6878	34.9893	22.14	3.41663	1.9955
InN NR2F2 VIP	0.117146	2.30032	2.28967	0.0958466	0.0212993	0.617678	3.01384	0.244941	14.2386	37.0501	1.57614	50.1278	37.6464	39.5527	1.29925	33.7593	70.2982	72.6944	84.8243	38.722	66.9223	0.404686	17.8062	4.57934	32.4281	2.8115	8.24281	16.1235	1.75719	3.48243	1.59744	2.7263	5.91054	7.97657	2.32162	3.80192	0.149095	0.425985	2.61981	12.4601	0.0106496	16.7093	11.8317	16.5921	42.6837	47.4973	22.2577	9.43557	1.459
InN PROX1 CRH VIP	0.0581818	3.04	3.91273	0.567273	0.0145455	0.930909	16.0727	0.0145455	15.4473	22.1382	0.48	20.1018	42.3127	18.88	0.567273	17.7309	42.3709	27.6073	33.8909	14.9527	28.6255	0.0581818	3.36	0.0872727	34.2545	2.19636	17.3818	10.4436	0.145455	1.19273	1.92	7.21455	11.5491	7.70909	3.88364	16.48	0	0.276364	2.67636	39.8545	0.130909	6.56	3.62182	4.88727	30.1382	28.9164	52.2036	8.69818	37.8327
InN ADARB2 RELN	0	2.88066	2.46914	2.05761	0	1.23457	35.8025	0	26.3374	11.9342	0.823045	18.107	54.7325	20.9877	0.823045	7.81893	13.9918	7.40741	5.76132	4.93827	29.2181	0.411523	6.17284	0	40.7407	2.05761	17.6955	2.88066	0	2.05761	2.88066	1.64609	9.0535	12.3457	31.2757	23.4568	0	1.23457	14.8148	51.4403	0	17.6955	0	3.29218	28.8066	18.5185	7.81893	6.99588	6.17284
InN ADARB2 RELN CRH	0	5.5	5.33333	1.66667	0	2	27	0.166667	30.8333	15.5	1.5	25.8333	67.3333	21.1667	1.16667	14.1667	23	9.33333	16.3333	7	41.5	0.166667	7	0	60.1667	1.83333	21.6667	9.83333	0	2.33333	3	2.33333	40.5	11.3333	57.3333	36	0	0.666667	12.1667	75	0.666667	12.3333	0	1.83333	50.3333	40.3333	27.1667	12.8333	54.5
InN ADARB2 RELN LAMP5	0	7.53247	3.37662	1.81818	0	1.94805	40.3896	0.12987	76.6234	12.8571	0.909091	23.3766	67.013	30.6494	1.42857	12.3377	19.2208	12.0779	15.0649	8.31169	62.7273	0	1.55844	0	69.6104	2.33766	12.4675	5.19481	0	3.11688	4.41558	2.46753	53.5065	14.5455	58.4416	41.9481	0.12987	0.909091	1.94805	54.6753	0.25974	10.5195	0	2.07792	40.7792	20.7792	31.039	2.72727	25.4545
InN MEIS2 ISL1 FOXP1	0.268189	1.03815	1.91193	3.10581	0.103815	1.84272	42.4864	4.51596	15.1138	32.5547	2.95873	17.9081	45.8258	39.0864	1.75621	9.20495	22.1386	24.2755	49.6583	21.5157	49.0008	0.570984	4.61113	0.181677	32.399	4.05744	1.98114	4.59382	1.06411	6.32408	62.6871	5.86556	8.34847	10.9871	17.5534	12.3973	0.925686	6.70473	0.328748	0.588286	0.0432563	16.8094	6.62687	3.53837	14.9667	5.31188	2.62133	0.882429	1.21983
InN MEIS2 ISL1 ZFHX3	0.0489716	0.244858	0.0979432	3.42801	0.734574	3.2811	5.97453	6.85602	11.2635	35.0147	2.49755	25.0735	34.9657	27.3262	2.74241	24.094	55.24	56.4643	72.429	29.285	63.3692	2.74241	2.59549	1.17532	27.3751	2.10578	1.71401	8.619	3.03624	2.74241	34.2311	7.00294	5.58276	14.7405	0.783546	2.20372	1.90989	10.5779	0	0.146915	0.0489716	13.4182	4.45642	10.333	14.9853	6.51322	2.10578	0.93046	1.3712
InN MEIS2 FOXP1 PENK	0.36317	1.47404	2.34993	1.7304	0.0427259	1.36723	22.3884	0.341807	8.67336	22.2602	1.79449	22.7943	21.363	11.1728	1.47404	7.24204	24.7597	31.5104	37.4279	18.5858	36.7016	0.769066	3.61034	0.256355	20.4657	4.40077	2.43538	4.52895	2.34993	7.28477	6.87887	6.47298	5.89618	23.7983	1.83721	20.7221	0.106815	0.512711	0.299081	1.02542	0	13.8432	2.58492	2.43538	15.7659	2.90536	2.3072	1.36723	0.448622
InN MEIS2 SIX3 ZFHX3	0.142702	0.720304	0.903778	3.82577	0.108725	0.781462	40.14	1.38625	15.7855	31.3944	1.78717	29.4713	38.9984	23.8448	1.0193	14.4197	44.6181	45.2772	65.8875	22.8934	58.9087	0.149497	17.7154	1.20277	34.3979	1.97064	1.86192	17.3077	1.0193	1.66485	12.1161	5.93911	10.8793	10.5735	2.1813	21.4732	0.577603	2.6094	0.135906	0.373743	0.00679532	10.7638	7.33216	3.07149	26.0805	14.175	5.98668	10.6347	0.516445
InN MEIS2 FOXP2 TSHZ1	0.217202	1.8788	2.18288	3.60556	0.0760209	0.87967	17.3328	1.79192	12.424	31.4509	2.11772	21.5899	30.1477	29.04	0.792789	9.71981	45.5908	53.5838	56.3858	29.7893	51.6725	0.358384	21.7854	0.738488	32.1785	2.0417	1.6616	17.702	0.847089	3.18202	11.7507	2.21546	6.35317	5.84275	5.745	12.0547	0.684188	8.72068	0.336664	1.62902	0.086881	10.8058	5.6907	3.93136	9.48089	6.19027	4.59383	13.6512	0.336664
InN MEIS2 PAX6 SCGN	0.142101	3.97881	2.11859	3.7592	0.0645911	0.994704	14.533	1.84731	19.119	33.0319	2.89368	37.0236	34.5433	42.966	1.25307	16.742	60.8707	71.6445	80.3772	42.4881	62.7567	0.193773	29.7378	0.943031	32.0501	1.60186	2.09275	20.2945	1.03346	1.2014	2.36404	1.33058	3.11329	6.29118	0.607157	5.92947	0.36171	3.73337	0.297119	0.839685	0.0258365	22.7748	9.59824	14.6105	20.5658	16.8066	14.8947	23.9246	0.348792
InN MEIS2 ZIC1 ZIC2	0.0876424	0.832603	0.262927	12.0508	1.18317	3.85627	43.865	31.6827	60.8677	47.1516	4.03155	6.83611	65.6442	48.1595	1.88431	24.6275	53.8563	57.8002	73.7949	36.6784	72.0859	1.00789	8.19457	0.0438212	42.3313	2.45399	1.13935	8.45749	2.0596	2.84838	35.6266	7.66871	3.81245	0.438212	27.8703	7.53725	20.2892	79.2726	0	0.744961	0.0438212	43.0762	12.8396	29.0973	5.43383	3.41805	2.2787	13.6284	0.306748
	Abbreviation
	InN, interneuron
	GE, ganglionic eminences
[truncated: 33 more columns]

## Sheet: fetal_macaque_pct.exp
Table S2. The expression percentages of inhibitory marker genes in fetal human, fetal macaque and adult primate subtype cells.
Fetal Macaque
	FOXJ1	CRYAB	HOPX	HMGA2	NKX6-2	OLIG1	NRG1	DLK1	SOX5	GPX1	SFRP2	CCND2	PAK3	ARX	OLIG2	ASCL1	DLX1	DLX2	DLX5	GADD45G	GAD2	GSX1	PAX6	GSX2	GAD1	LHX6	MAF	MAFB	NKX2-1	CRABP1	TAC1	TAC3	SST	NPY	RELN	GUCY1A2	LHX8	ZIC1	DCN	CCK	PVALB	SOX6	SATB1	ST18	NR2F1	NR2F2	PROX1	SP8	CRH
GE Ependymal FOXJ1	30.5718	18.9032	21.7036	1.51692	0	12.6021	3.50058	0	48.6581	39.9067	9.91832	62.6604	22.7538	12.1354	7.81797	20.8868	16.5694	14.119	5.83431	8.4014	15.4026	0.816803	15.5193	10.2684	4.2007	3.50058	1.05018	3.96733	27.6546	19.1365	2.33372	3.3839	3.3839	22.6371	1.16686	7.5846	0.233372	5.13419	2.56709	2.68378	0	44.9242	19.6033	1.16686	28.4714	7.70128	3.3839	1.40023	5.71762
GE RG CRYAB	26.4344	49.1803	20.5601	8.87978	0.34153	5.94262	8.26503	0	55.4645	42.7596	15.847	77.3907	16.5984	18.3743	9.28962	25.4781	18.0328	12.8415	5.46448	7.24044	11.4071	0.204918	35.6557	12.1585	4.09836	2.86885	1.98087	3.55191	13.1831	3.21038	1.57104	1.57104	0.819672	13.2514	0.887978	9.15301	0.136612	3.89344	5.53279	1.57104	0.068306	64.071	16.735	1.43443	56.8306	8.74317	2.86885	2.3224	15.9836
GE RG HMGA2 NKX6-2	0.607399	0.276091	9.88404	58.0342	11.9271	6.68139	0.993926	10.9332	27.6643	23.0812	6.62617	48.6472	7.50966	4.08614	12.7554	21.3694	9.77361	7.95141	1.65654	2.81612	3.6444	0.110436	6.90226	14.3567	1.49089	0.88349	0.607399	0.828272	20.0442	1.32523	3.09221	0.276091	3.75483	9.99448	0.607399	5.30094	1.54611	6.18443	1.54611	0.276091	2.15351	18.9398	6.07399	0.441745	60.8504	20.8724	0.386527	0.552181	0
GE RG HMGA2 NR2F2	2.46622	1.26528	8.79262	50.697	3.53849	3.94596	2.27321	2.72357	29.0371	26.3993	14.154	52.6485	10.4654	15.0976	11.6234	26.0776	12.3311	9.822	2.10165	4.6751	6.26206	0.257345	34.3341	11.9237	1.60841	0.922153	1.11516	0.879262	9.20009	2.03732	2.38044	1.60841	3.60283	4.4392	1.15805	5.46858	1.02938	4.01029	3.77439	0.557581	1.75852	26.0347	6.96976	0.471799	81.5998	52.9702	1.11516	1.32962	1.09372
GE RG HOPX NRG1	3.7518	47.3304	92.2078	3.6075	0	1.7316	67.5325	0	48.4848	44.4444	4.4733	78.2107	21.5007	30.8802	0.865801	19.1919	13.2756	10.9668	7.64791	6.34921	10.6782	0.1443	71.7172	8.36941	3.6075	2.4531	3.3189	3.0303	2.1645	4.329	0.865801	1.5873	0.577201	5.05051	1.0101	10.3896	0	2.7417	28.5714	0.577201	0	70.9957	22.0779	1.443	45.8874	5.91631	3.0303	12.987	32.6118
GE RG HOPX OLIG1	3.88404	7.17703	19.6735	16.0991	0.422178	19.7017	4.7284	0	44.1599	35.7163	6.41711	87.6724	28.0326	12.7498	25.387	39.347	40.4728	31.8604	4.78469	18.8292	21.7844	0.0281452	14.5229	14.4948	2.53307	1.35097	1.91388	3.57444	19.2795	1.1821	0.703631	0.985083	0.816212	14.9451	0.422178	5.79792	0.112581	6.13566	3.88404	0.900647	0.225162	42.6119	13.9882	1.57613	44.4413	11.0329	2.70194	2.64565	5.43203
GE RG NKX2-1 DLK1	0.207469	0.259336	13.1224	59.751	9.07676	16.1826	0.726141	49.7407	21.7842	18.8278	5.60166	35.7365	8.55809	3.89004	22.3029	20.8506	11.3589	8.09129	2.02282	6.12033	4.25311	0.622407	4.82365	13.5373	1.19295	1.40041	0.93361	0.93361	33.2469	1.40041	3.57884	0.363071	3.21577	5.75726	0.778008	4.97925	1.34855	21.7842	0.726141	0.103734	2.74896	21.2137	7.36515	0.570539	30.7054	7.88382	0.363071	1.97095	0.0518672
GE RG NKX2-1 OLIG1	0.613953	0.837209	1.39535	37.0047	1.84186	22.7535	0.613953	7.55349	37.8419	17.414	3.40465	69.3581	20.8372	10.5302	36.9488	44.0186	44.1674	34.9767	3.66512	11.7209	18.8465	0.465116	3.49767	19.6651	1.1907	0.967442	0.837209	1.80465	39.9442	0.725581	1.45116	0.651163	1.82326	13.7674	0.353488	5.82326	0.911628	7.51628	0.837209	0.111628	1.43256	29.6558	9.46977	0.390698	44.3907	10.1209	1.48837	1.30233	0.111628
GE RG SOX5	5.60374	5.33689	3.06871	10.9406	0.667111	12.0747	0.867245	0	70.3135	32.8219	8.87258	89.2595	23.9493	8.80587	17.9453	28.2188	23.9493	14.0093	4.46965	5.87058	10.1401	0.266845	5.20347	12.7418	2.13476	2.93529	1.26751	2.73516	27.952	2.4016	0.933956	0.400267	0.333556	17.8119	0.133422	7.27151	0.133422	2.66845	1.93462	0.800534	0.400267	41.561	12.1414	0.733823	43.9626	3.86925	2.00133	1.46765	2.26818
inIPC ASCL1 DLX1	0.727273	0.6	0.963636	4	0.418182	7.50909	0.690909	8.05455	37.3455	12.0909	0.563636	84.2182	44.6364	42.4545	13.0182	39.9636	85.4364	77.6727	38.8545	39.3091	73.6	1.69091	8.23636	16.6909	12.2545	8.14545	2.67273	5.2	30.1818	2.90909	0.672727	2.6	1.52727	36.0182	0.236364	3.43636	2.23636	7.25455	3.83636	2.90909	0.163636	36.0545	14.6364	15.8545	31	11.1273	11.4727	14.4364	0.4
inIPC ASCL1 GADD45G	0.127939	0.159923	1.82312	13.1777	0.447785	12.0582	0.68767	1.85511	24.1484	18.3112	1.10347	82.7443	32.2245	26.4993	25.1719	71.1339	86.7584	80.8092	16.8079	50.2799	62.578	5.69327	9.05166	22.3733	3.80617	4.31793	0.735647	2.52679	29.8737	2.55877	2.97457	2.54278	2.60675	15.8484	0.655685	4.63777	0.767632	1.88709	1.47129	1.79114	0.255877	21.8135	8.92372	2.9266	49.5602	16.8079	4.39789	6.34895	0.239885
inIPC ASCL1 GPX1	1.01636	1.6113	3.52008	3.61924	0.0743679	15.642	0.297471	0	31.5816	41.9187	3.17303	84.0605	23.7481	14.7992	31.9534	43.8027	57.4864	44.6951	8.03173	17.65	34.829	0.520575	7.61031	19.9802	3.32176	1.58651	1.01636	1.43778	19.9306	4.18939	1.98314	2.18146	2.25583	17.0798	0.594943	4.66039	0.322261	1.48736	4.21418	3.17303	0.148736	19.0134	7.83342	1.90878	50.818	16.2122	2.37977	2.62766	0.545364
inIPC ASCL1 GSX1	2.63736	2.41758	3.2967	5.71429	0.549451	6.26374	0.769231	6.81319	40.4396	16.8132	0.32967	75.0549	46.044	40.5495	17.8022	49.6703	82.5275	76.5934	43.956	44.3956	59.8901	13.7363	9.45055	24.3956	7.25275	2.30769	1.53846	2.52747	20.2198	12.3077	2.30769	7.69231	2.74725	14.2857	0.549451	2.96703	1.53846	2.08791	5.05495	9.67033	0.10989	28.2418	9.78022	29.5604	63.0769	36.8132	25.6044	13.956	0.21978
inIPC ASCL1 NKX2-1	0.302615	0.428229	1.07914	2.69499	0.108485	4.72194	0.61665	0.485326	41.6181	9.04419	0.582391	74.803	35.8171	49.2577	9.56949	36.7991	80.3186	72.9987	40.4362	31.9173	80.8096	2.72925	4.2309	9.64371	16.8494	22.0281	4.00251	8.43325	43.2283	6.77744	2.18682	4.06532	2.83202	36.8734	0.473907	5.03597	1.51308	3.00902	2.92338	2.10118	0.0342583	46.3172	14.103	7.78235	26.8357	6.02946	9.07274	7.57109	0.114194
inIPC ASCL1 SP8 PAX6	0.407731	0.913316	2.32406	2.34037	0.0489277	2.67471	3.04982	0.138628	29.218	14.9963	0.326184	81.8723	47.941	42.2735	7.30653	33.2708	77.7134	72.6005	56.8132	39.2237	74.1173	0.888853	22.1561	12.6233	22.3599	3.84082	1.52491	8.79067	5.43097	5.06401	2.00603	3.84898	1.63908	34.918	0.562668	5.09663	0.31803	3.18845	10.3156	6.25459	0.0163092	21.5119	12.4602	16.5783	39.8924	18.6251	14.6375	36.7202	0.799152
InN LHX6 MAF	0.199371	0.682144	1.96734	0.205961	0.0247154	0.665667	0.696973	0.04284	15.6794	3.97588	0.0560215	14.0762	23.5191	48.9216	0.743109	11.0577	45.1187	45.4796	34.4466	16.3682	47.3942	0.0395446	0.675553	1.74985	19.8942	29.001	34.6196	16.3418	3.29868	3.03999	0.804073	0.67061	8.04897	9.75598	2.35949	5.23471	0.298232	0.543738	9.17599	8.87117	0.0543738	25.0614	17.482	0.624475	14.7814	3.31515	3.78639	1.12867	0.718393
InN LHX6 MAF CCK	0.222627	1.01194	3.31917	0.0404776	0	1.05242	0.951224	0.0202388	23.8211	7.30621	0.0202388	25.9259	42.7646	49.6661	1.01194	6.69905	55.4139	45.4564	33.1714	19.5507	53.1067	0.101194	1.82149	0.890508	32.6047	36.268	37.7454	15.5232	18.7007	14.5112	0.526209	2.50961	6.90144	15.766	2.30723	10.848	0.0202388	0.34406	14.3291	41.7729	0.0607165	35.0941	17.0816	3.17749	38.8585	14.1267	20.5222	6.41571	1.61911
InN LHX6 MAF DCN	0.0491473	0.579938	2.19197	0.250651	0.0245736	0.575023	0.933799	0.0196589	8.73347	2.86529	0.137612	10.95	29.8177	51.1083	0.948543	12.5326	45.9724	37.4011	27.4733	15.2504	47.2944	0.00982946	0.801101	2.17723	30.2108	39.6127	56.9421	43.0334	3.58775	0.953458	0.889566	0.555364	15.1226	8.86126	6.23679	7.53919	0.167101	0.634	27.6847	10.2816	0.747039	34.8651	31.2724	0.889566	21.1088	3.84823	3.69588	1.36629	1.32698
InN LHX6 SST NPY	0.124766	0.873362	5.58328	1.8403	0	1.15409	2.05864	0	7.67311	10.7923	0.0935745	13.4435	38.8958	50.0312	1.71553	10.6987	58.5465	31.0044	19.6818	8.48409	30.5989	0.0311915	1.0917	1.55958	41.3288	47.2863	56.2071	42.8571	3.61822	1.74672	8.29694	2.49532	88.6463	50.655	26.9183	20.6488	0.343107	1.0917	7.7355	21.5533	0.40549	69.6818	43.1691	1.24766	42.6076	14.7536	7.01809	2.5577	2.68247
InN LHX6 SST NPY-	0.073172	0.684681	2.9112	0.224743	0.0156797	0.789212	1.09758	0.0627189	7.00361	5.37292	0.0783986	7.82418	27.8106	49.2186	0.56447	8.15345	44.7447	27.6695	16.631	5.59766	35.5825	0.0209063	0.878064	0.674228	28.0144	38.87	50.9591	48.304	0.679454	1.44253	2.08018	0.956463	66.3304	10.7824	23.1537	10.2963	0.162024	0.36586	8.34684	12.3817	0.554017	37.6104	34.6313	0.391993	32.3473	6.03146	2.89552	1.36936	1.43731
InN LHX6 GUCY1A2	0	1.06383	18.3511	0.797872	0	1.32979	4.52128	0	15.4255	7.44681	0.265957	10.3723	70.4787	65.6915	0.531915	14.3617	54.5213	28.1915	21.5426	6.11702	58.2447	0	1.8617	0.265957	85.1064	66.4894	31.6489	76.8617	0.531915	15.1596	12.234	30.0532	47.3404	6.64894	28.4574	70.7447	0.531915	0.265957	21.0106	35.6383	3.98936	53.7234	85.1064	1.32979	74.2021	29.2553	7.97872	2.92553	1.59574
InN LHX6 NKX2-1	0.0358295	0.0358295	0	0.394124	0.143318	0.0716589	1.86313	0	27.9828	2.93802	0	46.7216	34.4679	73.8445	0.0358295	9.10068	81.2612	75.9943	57.6138	25.0806	82.7302	0	1.11071	11.3579	38.1942	37.1551	28.4844	16.1591	28.4128	1.39735	2.11394	2.7947	4.98029	45.8617	0.0358295	1.75564	0.250806	0.824077	5.58939	2.29308	0	55.0699	30.3834	4.55034	17.1265	3.97707	9.60229	2.40057	0.394124
InN LHX6 NKX2-1 CCND2	0.245813	0.649946	1.39572	0.470794	0.0249979	0.899925	0.795767	0.108324	35.6512	5.95784	0.0541622	49.0001	29.4934	56.6494	1.64153	10.0992	57.3327	63.878	45.7712	22.9231	67.9277	0.462461	0.933256	4.7996	22.1148	33.443	8.58678	9.6242	27.1061	8.0285	1.34155	3.54137	3.32472	27.4769	0.44163	3.58303	0.912424	0.824931	3.16224	2.52479	0.00833264	46.9669	17.6235	5.1704	12.4448	3.25806	9.85751	3.22473	0.337472
InN LHX6 NKX2-1 CRABP1 TAC3	1.02602	1.35581	11.8358	0.183217	0.0366435	1.90546	1.42909	0.293148	11.4328	4.80029	0.256504	14.181	39.5749	38.7688	2.63833	3.6277	54.0125	36.7167	26.6032	23.8915	43.4958	0.219861	1.79553	0.659582	37.6695	37.9993	14.7673	39.6849	44.7783	89.923	3.6277	41.1506	6.55918	13.8879	1.86882	12.3122	5.93624	7.91499	3.95749	11.7992	0	36.5702	21.7662	46.5738	12.4221	5.09344	36.8267	3.73763	1.57567
InN LHX6 NKX2-1 CRABP1 TAC3-	0.555919	0.801177	5.29758	0.147155	0.0327011	1.37345	0.506867	0.0163506	18.2472	3.0085	0.114454	15.8927	40.4022	49.9836	1.74951	3.31916	45.2256	44.8986	32.9627	27.0602	50.9974	0.130804	1.03009	1.22629	37.1485	46.4846	26.4225	46.1086	44.6861	79.2675	2.82865	7.97907	3.59712	13.5873	0.931982	8.15893	1.20994	6.44212	2.51799	5.46109	0.0981033	53.5481	20.242	42.4787	9.95749	2.46893	36.4127	2.46893	0.555919
InN LHX6 NKX2-1 LHX8 ZIC1	0.216638	0.0866551	0.649913	4.46274	0.34662	0.953206	1.34315	3.72617	4.80936	1.99307	0.303293	7.79896	21.6638	50.1733	0.736568	5.28596	31.4991	35.8752	24.2634	5.06932	37.9116	0.0433276	1.68977	0.476603	18.2842	34.2721	0.996534	6.80243	38.6915	17.9376	3.7695	1.29983	5.28596	1.77643	1.21317	5.06932	60.5286	34.3154	0.649913	0.563258	0.0866551	32.1057	13.2149	3.11958	12.6516	6.49913	1.29983	2.68631	0.0433276
dividing InN SST NPY	1.00334	0.668896	2.00669	36.1204	1.00334	7.02341	1.67224	2.67559	19.0635	5.35117	3.01003	43.8127	24.0803	29.4314	14.7157	21.7391	49.8328	38.1271	8.3612	10.0334	16.7224	0.334448	4.68227	6.68896	23.0769	13.0435	18.0602	14.7157	28.4281	0	0	0.334448	59.8662	44.8161	2.00669	18.7291	0	18.0602	1.33779	12.3746	1.33779	64.5485	45.1505	0	74.5819	24.7492	1.00334	0.334448	0
dividing InN SST NPY-	1.03093	1.03093	1.03093	28.866	1.03093	3.09278	0	1.03093	9.27835	3.09278	2.06186	46.3918	17.5258	36.0825	7.21649	21.6495	46.3918	42.268	17.5258	8.24742	22.6804	0	1.03093	7.21649	25.7732	10.3093	27.8351	17.5258	19.5876	0	0	1.03093	60.8247	5.15464	1.03093	10.3093	0	12.3711	1.03093	24.7423	4.12371	43.299	29.8969	0	70.1031	9.27835	0	1.03093	0
InN NR2F2 DCN	0	0.414938	1.65975	0	0	1.65975	0	0	16.805	7.67635	0	25.7261	39.6266	26.1411	1.03734	8.29876	65.3527	20.9544	22.1992	28.8382	25.7261	0	1.24481	0	31.5353	7.67635	39.4191	10.166	0.829876	0.829876	2.28216	16.5975	13.0705	6.43154	13.9004	12.2407	0	0.414938	26.7635	88.3817	0	8.71369	15.9751	2.28216	58.0913	56.0166	56.8465	13.0705	15.1452
InN NR2F2 DCN KIT	0	0.739958	13.0021	0.211416	0	1.10994	1.69133	0	13.2135	4.96829	0.0528541	20.0317	46.5116	33.7209	1.21564	32.8753	68.129	27.907	25.4757	8.82664	39.7992	0	9.93658	0.158562	49.4715	3.96406	35.9937	9.51374	0.369979	3.91121	0.89852	7.24101	10.5708	3.8055	23.1501	34.8309	0.105708	0.475687	47.1459	84.7252	0.369979	6.34249	16.7019	1.16279	81.1839	84.9894	43.7104	42.7061	22.4101
InN NR2F2 DCN RELN	0.306373	1.47059	5.45343	0.306373	0	1.83824	1.04167	0	31.6789	10.4167	0	21.3848	40.1348	26.7157	1.59314	28.9828	61.6422	27.8799	25.8578	14.5833	39.5833	0	1.83824	0.428922	47.9779	2.81863	14.8284	6.4951	1.10294	2.38971	0.490196	31.924	28.0637	4.04412	48.1005	17.402	0	0.306373	23.5907	46.6299	0.122549	9.98775	17.1569	3.55392	82.2917	78.5539	41.6054	13.174	7.72059
InN NR2F2 DCN SP8	0.317493	1.52443	2.63622	0.195998	0.0343855	0.781698	0.656764	0.118057	22.8091	9.28982	0.0733558	33.4434	36.1976	36.6137	1.12555	9.12821	64.858	40.8351	34.9976	17.6638	26.7726	0.0469936	5.37446	1.02698	21.5517	2.11929	6.18366	6.72466	0.780552	2.63622	0.900901	8.03246	3.91193	4.82314	2.23964	8.73049	0.231529	0.428673	21.021	62.1587	0.0320932	6.40373	12.7822	5.96016	67.0312	52.7967	39.5606	28.7727	2.81503
InN NR2F2 GALP	0	0	1.42045	4.26136	0.568182	0.568182	4.26136	11.3636	14.2045	3.69318	0.284091	5.39773	28.9773	19.6023	0.284091	7.38636	79.2614	57.3864	42.8977	6.25	43.1818	0.568182	1.70455	0.284091	19.6023	3.69318	0.852273	3.125	10.5114	1.42045	2.27273	5.11364	5.39773	2.55682	4.54545	3.97727	2.84091	17.8977	3.69318	2.27273	0.284091	6.53409	5.96591	7.38636	45.1705	36.3636	4.54545	2.84091	0
InN PROX1 CRH	0.40117	0.768342	4.73924	0.0815938	0.013599	0.877133	0.863534	0.0203984	8.41096	5.09961	0.0611953	20.1265	34.249	28.9998	1.04032	8.67614	66.0842	33.943	25.5729	9.83205	23.2882	0.0339974	1.78826	0.271979	20.1333	1.54348	24.8589	10.8996	0.156388	2.42062	0.625552	8.73054	4.03889	5.19481	1.21711	18.5082	0.00679948	0.407969	9.82525	84.266	0.0679948	2.18943	11.4979	6.09234	59.917	53.0972	75.3111	17.9914	38.6483
InN PROX1 CRH SP8	0.123472	0.83961	6.23534	0.0987776	0.0370416	0.938387	0.790221	0.0246944	6.90209	5.39573	0.0987776	31.5101	41.857	30.2753	0.963082	14.6191	74.9228	40.7705	26.386	13.94	25.497	0	6.07482	0.296333	24.8549	2.44475	38.7949	11.1372	0.22225	0.963082	0.53093	5.56859	5.23521	3.95111	1.56809	20.8915	0	0.321027	12.3225	97.5923	0.0864304	3.44487	11.9891	1.53105	57.2416	45.8081	76.565	47.7713	45.4377
InN PROX1 CRH VIP	0.099734	0.797872	17.4867	0.0664894	0	1.5625	1.82846	0	5.51862	4.65426	0	30.5186	54.5545	34.2088	0.964096	20.2793	77.6596	45.6449	33.7434	12.3338	31.0173	0	1.69548	0.232713	42.387	3.39096	53.2912	28.4907	0.232713	1.59574	0.531915	4.18883	5.31915	4.42154	1.89495	42.3205	0	0.398936	6.68218	95.0133	0.166223	4.12234	16.2566	8.57713	71.4096	39.2287	93.6503	33.6436	81.516
InN PROX1 CRH VIP KIT	0.0642261	0.834939	13.2627	0	0.0963391	1.15607	1.02762	0	6.03725	4.01413	0	28.8054	49.2614	26.8786	0.995504	20.3276	79.4798	38.8568	25.851	9.82659	28.6127	0	10.501	0.0642261	36.9942	3.50032	39.3064	21.4515	0.128452	1.28452	0.513809	1.34875	5.71612	4.27103	2.2158	33.9435	0	0.32113	11.6891	90.334	0.0963391	3.72511	13.4232	0.867052	75.6583	55.5556	88.2145	54.6243	86.4162
InN MEIS2 ISL1 FOXP1	0.2501	0.360144	1.70068	0.920368	0.070028	0.680272	2.39096	0.640256	2.87115	10.8543	0.15006	13.1853	34.3337	24.6499	0.830332	2.96118	15.6763	12.8752	26.2905	10.1841	42.1068	0.030012	1.63065	0.570228	14.2657	3.2413	2.52101	4.73189	1.59064	7.86315	61.6447	30.8223	5.06202	17.0368	9.45378	9.83393	0.460184	1.55062	1.40056	4.4918	0.030012	5.4922	4.88195	1.36054	15.8663	3.9916	1.69068	2.0108	0.360144
InN MEIS2 ISL1 ZFHX3	0.108196	0.351636	0.892616	1.78523	0.0811469	0.595077	3.08358	0.108196	4.19259	4.30078	0.0540979	20.3949	28.5096	26.6703	0.703273	5.2475	36.489	28.4555	41.5472	6.14011	49.5266	0.0811469	1.3795	1.40655	17.6089	0.946714	0.946714	4.86881	0.973763	2.94834	36.0563	36.0563	2.10982	57.2626	0.730322	4.67947	0.189343	0.459832	1.08196	2.13687	0	5.89667	4.27374	1.10901	13.4163	3.59751	2.40736	4.78767	0.78442
InN MEIS2 ISL1 PAX6	0	0.178891	1.07335	8.40787	0	0.178891	5.18784	1.07335	5.72451	7.33453	0.536673	3.22004	27.907	38.2826	0	2.32558	26.1181	15.9213	21.8247	5.18784	54.9195	0	49.0161	0.536673	5.72451	0.536673	1.07335	3.9356	0	0.894454	6.08229	1.61002	3.04114	1.61002	4.83005	4.29338	0.178891	8.22898	2.14669	0.715564	0.178891	2.32558	3.22004	6.79785	74.7764	52.5939	10.7335	23.4347	0
InN MEIS2 FOXP1 PENK	0.474666	0.629209	2.1084	0.761673	0.0331162	0.507782	2.1084	0.242852	5.26548	6.53494	0.044155	18.7769	25.8307	7.95894	0.949332	2.92527	21.0619	15.2224	20.6314	13.8205	38.1941	0.0331162	1.85451	0.430511	12.7939	3.09085	2.58307	5.94988	1.23634	6.03819	4.40446	27.6079	2.72657	14.5932	1.17011	26.3936	0.0662325	0.574015	2.20775	4.2168	0	5.12198	4.0733	2.14152	19.649	3.32266	3.32266	3.58759	0.949332
InN MEIS2 SIX3 ZFHX3	0.102881	0.291495	1.08025	1.37174	0.102881	0.325789	13.6317	0.0685871	8.12757	4.68107	0.0514403	24.8628	25.9259	14.249	0.737311	7.15021	45.8848	40.7236	34.9451	8.04184	50.4458	0.102881	4.38957	1.59465	13.3059	3.00069	1.20027	11.9513	2.07476	2.91495	2.91495	26.6975	3.32647	25.6344	0.805898	7.35597	0.428669	0.720165	1.23457	2.00617	0.0342936	5.16118	6.73868	0.908779	17.7812	5.8299	2.79492	11.1797	0.548697
InN MEIS2 FOXP2 TSHZ1	0.373914	0.857803	2.5954	1.68261	0.0439899	0.439899	2.11151	0.0769823	4.95986	4.20103	0.0439899	21.3351	33.3663	15.2315	0.648851	1.62763	50.1925	33.0474	33.6193	16.3972	38.8541	0.0439899	6.01562	0.95678	24.4584	2.01254	1.79259	11.5803	0.934785	8.07214	7.69823	10.9205	1.58364	8.14913	1.45167	14.6706	0.0769823	0.714836	2.29847	3.16727	0.0219949	5.28978	8.14913	1.67162	11.8663	3.22226	4.13505	14.2307	0.285934
InN MEIS2 PAX6 SCGN	0.178728	2.42463	2.20544	0.138261	0.0236056	0.718284	0.812707	0.0168611	20.3615	6.57584	0.0236056	51.3927	38.9391	41.384	1.07574	3.37223	70.7493	53.352	49.801	31.3887	43.3095	0.0809334	17.1511	1.97612	22.4557	2.32346	2.15822	17.3063	1.00155	3.91515	0.684562	2.14136	1.82775	7.20308	0.536184	7.65495	0.0505834	0.660956	12.6492	11.5263	0.0101167	13.9408	15.4819	8.67337	27.2847	10.9665	18.065	53.1294	0.687934
InN MEIS2 ZIC1 ZIC2	0.501672	0.668896	2.34114	5.51839	0	0.668896	6.35452	11.3712	24.7492	9.53177	0	13.3779	37.7926	32.107	0.167224	5.01672	58.0268	42.8094	53.5117	13.7124	51.6722	0.334448	19.7324	0.83612	22.2408	2.17391	0.501672	4.8495	8.69565	2.50836	10.0334	2.50836	1.67224	1.17057	18.7291	4.8495	8.02676	65.2174	2.00669	1.17057	0.167224	5.85284	7.52508	8.86288	3.34448	2.00669	8.02676	38.796	0
[truncated: 33 more columns]

## Sheet: adult_primate_pct.exp
Table S2. The expression percentages of inhibitory marker genes in fetal human, fetal macaque and adult primate subtype cells.
Adult Primate
	FOXJ1	CRYAB	HOPX	HMGA2	NKX6-2	OLIG1	NRG1	DLK1	SFRP2	CCND2	PAK3	ARX	OLIG2	ASCL1	DLX1	DLX2	DLX5	GADD45G	GAD2	GSX1	PAX6	GSX2	GAD1	LHX6	MAF	MAFB	NKX2-1	CRABP1	TAC1	TAC3	SST	NPY	RELN	GUCY1A2	LHX8	ZIC1	DCN	CCK	PVALB	SOX6	SATB1	ST18	NR2F1	NR2F2	PROX1	SP8	CRH	CALB2	ADARB2
InN SST STK32A	0.105319	8.89942	20.3791	0.789889	2.47499	3.73881	21.9063	0	1.05319	45.6556	81.6746	54.3971	1.1585	2.68562	41.1796	10.7952	1.05319	1.4218	73.7757	0	1.47446	0	89.0995	61.4534	68.5624	48.7098	0	2.79094	12.3749	2.26435	75.4608	2.52765	95.8399	52.238	0	0.684571	2.05371	36.3349	1.31648	97.525	0.105319	7.05635	16.0084	3.79147	1.57978	0	1.6851	3.37019	3.21222
InN SST HS3ST5	0.0851789	8.77342	34.6678	1.10733	1.78876	3.40716	54.77	0	0.511073	64.9063	88.6712	46.7632	1.6184	1.1925	27.0017	6.13288	0.511073	1.53322	50.7666	0	3.74787	0	93.1005	56.8995	48.8927	28.109	0	0.511073	24.276	3.66269	91.908	19.4208	16.6099	42.5894	0.170358	0.76661	24.3612	35.6048	2.21465	99.1482	0.0851789	10.0511	35.4344	1.53322	1.87394	0.170358	2.21465	0.0851789	4.08859
InN SST FREM1	0.148002	9.91613	21.8056	1.43069	2.66404	5.13074	34.3858	0	0.444006	56.1914	91.7119	57.1288	1.87469	2.02269	43.5126	10.6068	0.838678	1.03601	85.7918	0	2.6147	0	92.2052	70.1036	52.3434	38.0365	0.049334	2.22003	51.8994	26.3937	84.9531	3.30538	66.6009	65.4169	0	1.33202	23.5816	43.7099	3.20671	95.9546	0.394672	6.90676	41.0952	35.7671	2.1707	0.049334	2.6147	0.394672	3.10804
InN SST TRPC7	0.0490436	9.22021	26.0912	1.02992	2.59931	3.62923	28.5434	0	0.833742	58.6072	91.2702	60.5689	1.37322	1.52035	37.2732	10.152	0.637567	2.01079	86.7092	0	2.30505	0	92.0059	58.3129	70.9171	53.6538	0.0490436	0.441393	27.7097	2.59931	90.7798	4.70819	80.2354	52.7219	0.0490436	0.882786	8.72977	45.0711	1.76557	98.5777	0.196175	8.14125	19.9608	3.33497	1.76557	0.245218	2.25601	1.61844	6.22854
InN SST ADAMTSL1	0	8.81057	24.0529	0.792952	1.32159	3.17181	42.467	0	1.4978	65.6388	93.1278	52.8634	1.4978	1.05727	31.9824	7.6652	0.264317	2.02643	70.7489	0	2.81938	0	87.0485	60.4405	65.5507	43.7885	0	0.352423	60.7048	4.49339	93.2159	11.9824	32.0705	37.533	0	1.23348	25.9912	45.1982	1.32159	99.1189	0	8.28194	27.9295	5.99119	1.23348	0.176211	2.46696	0.264317	6.34361
InN SST PLPP4	0.214362	12.1115	26.5809	0.96463	2.14362	5.25188	28.1886	0	1.07181	59.6999	89.6034	58.5209	0.750268	2.89389	30.5466	11.3612	0.857449	2.14362	87.3526	0	2.46517	0	95.284	61.9507	55.4126	49.089	0	0.643087	45.4448	0.857449	78.671	3.10825	18.5423	63.6656	0	0.750268	9.96785	43.7299	2.89389	99.1426	0	10.7181	23.0439	3.00107	1.50054	0.107181	2.14362	0.107181	3.10825
InN SST ADRA1D	0.246305	10.8374	32.0197	1.23153	2.70936	8.62069	46.5517	0	3.69458	61.33	94.8276	44.8276	1.72414	2.70936	23.399	6.40394	0.246305	2.95567	91.3793	0	2.21675	0	97.7833	69.4581	43.1034	36.4532	0	4.6798	73.8916	2.21675	40.8867	4.6798	11.33	48.5222	0	1.23153	15.7635	53.9409	11.0837	99.2611	0.246305	7.38916	34.7291	5.41872	3.20197	0	5.41872	0.492611	8.867
InN SST HTR2C	0	7.13732	20.481	0.465477	2.09465	3.4135	50.2715	0	1.86191	48.332	85.4151	38.8673	0.465477	1.78433	23.3514	5.43057	0.698216	0.620636	50.0388	0	1.55159	0	85.8805	53.4523	50.5818	31.4973	0	1.16369	40.1862	1.08611	76.9589	2.71528	7.68037	35.5314	0	0.853375	20.8689	36.7727	1.24127	98.7587	0.0775795	9.23196	30.5663	1.39643	1.55159	0.310318	2.48254	0.155159	3.0256
InN SST THSD7B	0	14.5875	32.998	1.00604	4.32596	5.6338	35.2113	0	1.20724	31.1871	94.8692	70.5231	1.50905	2.7163	44.4668	13.1791	0.704225	2.41449	88.0282	0	3.82294	0	91.7505	75.9557	43.2596	30.1811	0	1.00604	19.7183	19.5171	79.3763	3.82294	34.6076	62.173	0	1.60966	42.3541	39.336	2.21328	43.7626	0	9.55734	48.1891	2.91751	1.60966	0.201207	4.02414	0.503018	3.52113
InN SST NPY	0	13.8298	30.8511	1.59574	3.7234	7.97872	88.8298	0	0	47.3404	98.4043	54.7872	1.59574	1.59574	34.0426	13.2979	0	7.44681	85.1064	0	1.06383	0	87.766	70.7447	46.2766	24.4681	0.531915	2.12766	57.4468	1.06383	95.2128	98.4043	11.1702	82.4468	0.531915	1.59574	3.7234	38.2979	1.59574	99.4681	0	13.8298	15.9574	1.59574	4.25532	0	1.59574	0.531915	9.04255
InN SST HGF GABRQ	0	14.8	19.2	1.2	1.2	8	41.6	0.4	1.6	29.6	94	66.8	2.4	1.2	27.6	4.8	1.2	3.6	94.4	0.4	2.8	0	99.2	83.2	9.6	21.6	0.4	0.8	5.2	11.6	84.8	6.8	26.8	68.4	0	2	6	61.2	2.4	98.4	0	11.6	21.2	5.2	2	0	4.8	5.6	7.6
InN SST KLHL14	0.682128	10.9141	23.3288	1.22783	3.13779	6.41201	50.7503	0	1.36426	51.8417	93.9973	63.8472	2.72851	3.27422	48.8404	17.7353	1.77353	0.95498	90.9959	0.136426	2.59209	0	95.0887	77.0805	46.6576	46.5211	0	0.136426	17.1896	12.2783	93.0423	15.8254	53.0696	66.7121	0	1.36426	21.5553	41.2005	2.59209	96.0437	0.272851	10.7776	37.1078	11.0505	3.54707	0.545703	4.91132	2.59209	5.3206
InN SST ANKRD33B	0.442478	12.8319	26.5487	0.884956	3.53982	10.177	29.646	0	1.76991	61.9469	96.4602	76.1062	2.21239	3.09735	27.8761	6.63717	0.884956	5.30973	97.7876	0	2.65487	0	99.115	73.4513	38.0531	35.8407	0	0.884956	54.4248	1.32743	47.7876	6.63717	11.0619	88.4956	0	0.884956	5.30973	42.9204	19.0265	98.6726	0	13.2743	45.1327	1.76991	0.884956	0.442478	3.09735	0.884956	6.63717
InN LHX6 HGF STON2	0.539084	19.6765	28.5714	13.4771	2.69542	7.00809	36.9272	0	0.808625	47.9784	98.6523	56.8733	3.50404	1.61725	20.2156	6.469	1.61725	4.04313	98.9218	0	3.50404	0	98.9218	84.9057	16.1725	25.6065	0.269542	1.34771	30.1887	0.539084	15.6334	3.2345	7.00809	93.531	0	1.34771	12.938	43.1267	6.469	96.7655	0	12.3989	61.9946	1.88679	1.88679	0.269542	2.96496	0.539084	5.92992
InN PVALB PRKCH	0.396825	15.0794	26.1905	9.12698	2.97619	7.34127	31.9444	0	0.992063	43.8492	95.8333	46.8254	1.78571	1.19048	17.2619	5.35714	0.793651	1.5873	94.4444	0	2.97619	0	94.8413	75.5952	20.6349	22.2222	0.793651	3.1746	39.0873	0.793651	6.94444	2.18254	11.7063	91.4683	0	1.38889	4.96032	36.3095	22.619	98.6111	0	5.95238	43.4524	2.38095	2.38095	0.396825	1.98413	0.793651	4.7619
InN PVALB SNTB1	0.132979	14.3617	25.7979	3.98936	3.45745	9.9734	34.5745	0	1.32979	61.4362	97.0745	70.0798	1.19681	1.59574	21.6755	4.65426	0.930851	3.19149	98.6702	0	3.45745	0	99.3351	74.4681	41.7553	42.6862	0	0.664894	79.5213	0.531915	5.05319	4.3883	9.44149	82.7128	0	1.19681	7.04787	46.9415	45.7447	99.0691	0	11.4362	57.0479	2.26064	2.65957	0.265957	2.12766	0.398936	6.51596
InN PVALB SYT2	0.298063	18.3308	24.8882	1.04322	2.68256	11.1773	32.7869	0	1.34128	67.0641	96.4232	72.5782	1.93741	5.36513	23.0999	9.68703	0.745156	3.87481	98.8077	0	3.87481	0	99.7019	74.0686	42.1759	47.0939	0	0.894188	78.6885	1.04322	5.2161	3.87481	11.6244	76.6021	0.298063	1.93741	3.42772	43.2191	71.535	99.5529	0.149031	12.3696	39.0462	3.42772	2.23547	0	2.83159	0.298063	6.55738
InN PVALB ANOS1	0.239736	14.3242	24.3632	1.43842	1.82799	6.95235	30.926	0	2.42733	63.2304	93.9467	60.6533	2.03776	5.03446	24.3632	6.83248	0.629308	2.96674	96.6137	0	3.02667	0	98.9512	74.0186	52.8019	45.7896	0.0599341	1.31855	69.973	0.869044	13.1555	2.8169	8.81031	73.8388	0.0599341	1.64819	5.5439	45.6098	24.8726	99.3407	0	7.25202	36.8894	1.70812	1.79802	0.149835	3.0866	0.29967	4.52502
InN PVALB HPSE	0.148515	15.1485	23.1188	1.73267	2.42574	7.37624	27.2277	0	1.08911	58.4158	89.703	63.1188	1.33663	3.11881	23.3168	7.22772	0.891089	3.06931	98.8119	0	2.57426	0	97.1287	71.7822	53.2673	48.4653	0	0.693069	83.8119	1.13861	5.94059	2.77228	8.31683	75.396	0.0990099	1.53465	3.06931	41.3861	48.9109	98.9604	0.049505	9.20792	21.7822	1.63366	1.53465	0.0990099	5.44554	0.0990099	3.71287
InN PVALB PIEZO2	0.297915	13.853	25.422	2.23436	2.73088	5.85899	30.8342	0	1.29096	47.4677	94.4389	61.1221	1.29096	1.34062	22.8898	7.1003	1.09235	2.68123	96.2761	0	3.1281	0	96.4747	76.5641	41.3605	31.7279	0	0.645482	65.5909	1.48957	12.2642	3.0288	9.1857	81.1321	0.0496524	1.58888	4.02185	38.4806	19.712	93.148	0	9.58292	43.7438	1.93644	1.73784	0.148957	2.78054	0.347567	4.76663
InN PVALB GRIN2C	0	12.3303	34.0498	1.24434	1.80995	4.41176	26.6968	0.113122	7.01357	49.5475	92.9864	37.8959	1.47059	0.791855	14.5928	8.25792	1.69683	8.48416	13.6878	0	2.60181	0	89.2534	79.4118	39.3665	22.2851	5.99548	1.35747	30.4299	1.0181	4.52489	2.60181	11.8778	60.4072	0.113122	1.80995	2.0362	48.4163	47.2851	95.0226	0	8.59729	11.086	1.69683	4.0724	0.226244	55.9955	0.678733	4.18552
InN PVALB PDE3A	0	11.251	31.3139	0.86546	2.20299	4.64201	25.3344	0.0786782	7.00236	35.4839	87.4115	48.7805	0.944138	0.629426	13.2179	6.29426	1.18017	11.3297	8.33989	0	2.5177	0	86.074	68.7648	37.0574	30.2911	0.314713	0.629426	44.2958	1.10149	5.03541	2.67506	8.02518	63.2573	0.0786782	0.944138	1.49489	43.9024	54.2093	94.9646	0	6.845	7.31707	1.41621	1.49489	0.236035	81.1959	0	3.69788
InN LAMP5 LHX6 PROX1	0.114416	20.1373	23.341	2.0595	3.20366	5.60641	94.8513	0	1.373	60.4119	96.4531	47.8261	1.60183	9.7254	22.0824	8.00915	0.343249	2.97483	99.7712	0	2.63158	0	97.3684	70.9382	62.357	29.8627	22.9977	11.2128	8.3524	0.572082	6.86499	21.0526	11.4416	71.8535	0.228833	1.14416	1.94508	82.7231	2.17391	63.6156	0	11.0984	61.3272	4.69108	59.1533	0	5.14874	0	95.3089
InN LAMP5 LHX6 TAC1	0.100705	18.6304	25.5791	1.10775	1.61128	5.74018	59.8187	0.100705	1.40987	62.3364	94.5619	53.3736	1.51057	8.76133	21.5509	7.04935	0.704935	3.32326	98.8922	0	3.22256	0	96.0725	74.1188	70.7956	31.7221	23.7664	3.72608	32.3263	1.30916	5.84089	22.86	25.5791	61.3293	0.20141	1.61128	1.91339	91.0373	1.51057	75.8308	0	10.9768	52.0645	4.43102	15.5086	0.704935	5.13595	0.60423	60.7251
InN LAMP5 BMP7	0.0943396	21.2264	22.9717	1.08491	2.35849	4.95283	85	0	1.13208	65.7075	95.6132	42.4057	0.990566	14.8585	30.2358	7.83019	1.60377	3.20755	98.9151	0	3.20755	0	97.7358	1.5566	53.1132	19.4811	0.0471698	6.74528	2.31132	0.943396	5.51887	4.43396	27.5472	71.9811	0.0471698	1.36792	4.29245	71.0377	1.5566	13.3019	0	6.93396	60.6604	3.20755	70.283	4.76415	58.8679	0.283019	99.717
InN LAMP5 ADAMTS20	0	16	18.6667	0.444444	2.07407	4	96.2963	0	1.18519	57.7778	92.5926	36.4444	0.888889	13.9259	27.7037	5.33333	0.888889	3.40741	97.7778	0	1.03704	0	92.5926	1.18519	33.7778	16.8889	0.148148	8.14815	2.07407	1.62963	15.8519	5.18519	89.037	69.037	0	0.444444	2.22222	68.2963	1.48148	11.2593	0	8.2963	58.963	10.5185	52.4444	0.296296	31.2593	0.296296	97.7778
InN LAMP5 MEIS2	0	14.2157	23.5294	0.980392	1.96078	3.43137	56.8627	0	1.47059	59.8039	84.3137	40.6863	3.92157	2.45098	36.7647	8.33333	0	0.980392	94.1176	0	9.80392	0	92.1569	0.980392	42.1569	11.7647	0	1.96078	5.39216	1.47059	7.84314	1.96078	23.5294	61.7647	0	1.47059	24.0196	79.902	2.94118	13.2353	0	6.37255	52.451	3.43137	59.3137	23.0392	45.5882	0.490196	94.1176
InN LAMP5 RELN	0.14881	13.5417	20.0893	1.26488	1.26488	3.86905	74.1815	0	1.19048	54.3155	91.2202	33.1101	0.967262	12.5744	44.0476	8.63095	1.78571	3.42262	98.2143	0	1.41369	0	94.6429	1.71131	7.44048	11.6071	0.14881	2.60417	2.90179	2.00893	49.7024	9.15179	100	66.2202	0	1.04167	2.90179	56.9196	1.71131	12.5	0	8.33333	56.5476	56.994	54.9851	1.04167	22.0982	1.33929	98.4375
InN VIP FREM2	0	11.5226	26.8519	0.823045	2.46914	4.83539	28.6008	0	1.44033	73.4568	94.3416	26.2346	1.74897	3.49794	57.8189	18.93	0.925926	8.43621	37.4486	0	2.36626	0	88.9918	2.05761	28.6008	8.95062	0	0.720165	3.39506	53.1893	5.65844	1.85185	31.5844	79.0123	0	1.13169	2.88066	95.4733	1.64609	12.6543	0	7.92181	60.6996	16.358	82.4074	22.6337	73.8683	18.3128	97.6337
InN VIP SCML4	0.166528	12.2398	26.2281	1.91507	1.49875	4.99584	44.6295	0	1.24896	43.4638	95.0874	33.3056	1.99833	2.16486	37.4688	10.3247	1.83181	2.91424	84.5129	0	4.66278	0	92.8393	1.99833	24.3131	10.4913	0	0.582848	7.07744	5.32889	6.49459	3.74688	14.9875	63.0308	0	1.49875	3.41382	64.8626	2.0816	14.2381	0	10.408	49.9584	82.5146	83.2639	7.99334	38.4679	31.3905	98.751
InN VIP HS3ST3B1	0.173837	8.25728	25.4237	1.12994	2.52064	4.3894	52.3685	0.130378	0.956106	63.8418	93.2638	22.99	1.21686	3.38983	42.9379	14.2112	1.34724	5.30204	51.5863	0	1.82529	0	84.9631	1.1734	38.1573	14.7327	0	0.999565	2.30335	56.106	7.12734	2.17297	47.5445	57.6706	0.0434594	0.869187	12.2555	91.482	1.30378	13.0813	0	22.9465	62.7119	29.1178	88.8309	4.86745	65.5802	19.6436	96.7405
InN VIP ADAM12	0.0930233	14.9767	23.0698	0.744186	2.23256	5.86047	44.8372	0	2.69767	55.814	91.5349	23.907	1.39535	0.837209	43.814	12.5581	0.55814	7.53488	36.6512	0	2.23256	0	88.5581	1.48837	10.5116	4.83721	0	1.02326	2.88372	63.0698	5.39535	2.97674	14.6977	49.8605	0	1.48837	6.51163	62.6977	0.837209	11.6279	0	8.18605	50.6977	27.907	82.2326	20.2791	48.9302	15.814	96
InN VIP EXPH5	0	8.22669	28.8848	1.40158	1.34065	4.50945	90.5545	0	0.853138	34.9177	91.3467	26.1426	1.5844	0.914077	31.3224	8.40951	0.853138	4.57038	55.2102	0	1.5844	0	82.2669	1.70628	28.5801	23.9488	0	1.09689	2.49848	28.4583	6.21572	1.82815	46.6789	48.2633	0.0609385	0.975015	16.2706	74.1012	1.64534	13.5283	0	37.1725	44.0585	51.8586	83.3029	1.21877	30.1645	27.4223	92.9921
InN VIP CLSTN2	0.0577367	10.2771	22.5173	1.61663	2.25173	4.67667	41.1085	0	1.44342	48.037	92.7252	22.4596	1.21247	1.84758	43.2448	11.2009	1.27021	5.94688	64.3764	0.115473	12.6443	0	89.1455	1.38568	26.2125	7.79446	0	0.51963	2.194	32.2171	5.42725	2.77136	43.5335	73.3834	0	1.50115	8.71824	87.7021	2.07852	11.4319	0	9.23788	55.4273	44.2263	76.9053	24.2494	84.9307	39.03	98.3256
InN VIP EGF	0	11.5108	23.3094	0.863309	1.8705	6.18705	41.295	0	0.719424	44.6043	96.1151	13.8129	1.58273	4.02878	45.7554	13.6691	1.00719	6.18705	79.5683	0	2.15827	0	94.2446	1.29496	3.45324	4.60432	0.143885	3.88489	2.58993	39.2806	10.5036	1.29496	32.8058	37.8417	0.143885	0.863309	3.45324	37.8417	2.01439	12.2302	0	9.06475	61.0072	72.0863	86.1871	0.431655	4.7482	28.4892	98.4173
InN VIP PENK	0	8.60656	27.8689	0.819672	2.45902	4.09836	64.7541	0	0.819672	50.8197	96.3115	21.7213	2.45902	1.22951	63.9344	15.5738	1.63934	4.91803	82.7869	0	2.86885	0	92.2131	3.68852	18.8525	13.9344	0	14.7541	4.91803	25.4098	6.55738	4.91803	53.6885	59.8361	0	0.819672	3.68852	62.7049	1.63934	17.623	0	8.60656	76.6393	73.3607	48.7705	2.86885	6.14754	27.8689	98.7705
InN VIP MEGF11 LHFP	0.0864304	12.446	25.1513	0.864304	2.33362	4.66724	53.7597	0	0.950735	42.6102	93.172	21.089	1.72861	1.38289	36.9922	10.1988	0.605013	5.09939	54.2783	0	0.864304	0	92.0484	0.950735	10.9767	8.98876	0	1.1236	3.19793	66.6379	5.61798	1.72861	33.535	46.8453	0.0864304	0.950735	39.9309	50.9939	1.55575	10.9767	0	8.8159	54.1054	64.0449	79.6024	2.93863	46.4996	22.6448	91.5298
InN VIP MDGA1	0.881057	17.1806	23.7885	0.440529	1.32159	6.60793	37.0044	0	0.881057	74.0088	96.9163	44.0529	3.0837	11.0132	44.4934	10.1322	0.440529	7.92952	89.4273	0	29.5154	0	95.5947	1.32159	44.0529	4.40529	0	0.440529	2.64317	7.04846	6.1674	2.64317	51.5419	76.652	0	1.32159	38.7665	99.5595	1.32159	16.7401	0	9.69163	76.652	21.1454	70.0441	34.3612	70.4846	14.978	99.1189
InN ADARB2 RGS10	1.49254	12.6866	23.694	0.932836	2.98507	5.03731	55.0373	0	1.30597	61.194	94.7761	38.806	1.1194	14.9254	34.3284	8.39552	1.30597	3.35821	87.1269	0	19.5896	0	91.791	1.6791	43.2836	8.20896	0.186567	0.746269	2.23881	1.6791	8.39552	0.932836	70.5224	75.5597	0	0.746269	34.5149	99.0672	2.42537	12.3134	0	7.27612	66.2313	56.3433	49.2537	27.6119	69.5896	4.29104	99.4403
InN ADARB2 FAM19A1	0.152323	18.8119	20.1828	0.685453	1.82788	3.50343	34.1203	0.0761615	1.44707	48.3625	86.9764	15.6893	1.44707	6.01676	26.7327	6.24524	0.837776	1.9802	90.1752	0	1.06626	0	84.3107	1.75171	22.5438	12.1858	0.152323	0.53313	3.04646	1.06626	18.2026	2.43717	33.4349	64.5088	0.0761615	0.913938	20.9444	71.7441	2.74181	10.2818	0	5.40746	55.1409	70.0685	82.8637	3.9604	28.1036	10.5864	98.0198
InN ADARB2 COL5A2	0	10.4077	20.6009	1.28755	1.82403	3.54077	63.9485	0.107296	0.429185	44.206	89.5923	17.7039	1.07296	5.6867	28.7554	5.36481	0.858369	3.96996	93.2403	0	0.965665	0	87.7682	1.50215	3.64807	6.43777	0	1.18026	3.86266	8.04721	29.8283	8.79828	91.9528	69.0987	0	0.643777	2.14592	38.0901	0.965665	13.9485	0	6.00858	41.4163	65.3433	73.176	0.429185	7.29614	15.3433	94.9571
InN ADARB2 SFRP2	0	14.841	20.4947	1.06007	1.94346	3.53357	27.7385	0	15.5477	66.9611	92.7562	31.9788	2.4735	18.0212	34.9823	6.89046	0.530035	1.41343	86.9258	0	34.9823	0	90.4594	2.29682	37.4558	12.8975	0	1.94346	1.06007	1.76678	24.2049	2.4735	100	67.4912	0	2.29682	18.1979	95.9364	1.76678	12.0141	0	7.95053	78.4452	72.4382	15.5477	44.6996	76.8551	2.82686	99.6466
InN ADARB2 CADPS2	0.364964	8.75912	20.438	2.55474	4.0146	3.64964	63.5036	0	2.18978	54.7445	95.9854	31.7518	1.82482	10.219	36.8613	9.85401	2.91971	2.91971	85.4015	0	4.37956	0	82.1168	2.18978	31.3869	4.74453	0	3.28467	4.74453	2.91971	7.66423	4.0146	46.7153	67.5182	0	1.45985	18.9781	73.3577	2.18978	16.4234	0	7.29927	56.9343	83.9416	79.562	11.6788	44.5255	19.3431	99.635
InN ADARB2 PALMD	0	10.559	20.4969	2.48447	2.48447	4.34783	45.9627	0	8.69565	61.4907	96.8944	40.3727	1.86335	6.21118	36.0248	9.31677	0.621118	3.10559	86.3354	0	47.8261	0	81.3665	1.24224	12.4224	4.34783	0	3.72671	3.10559	2.48447	11.8012	4.96894	98.7578	65.8385	0	1.24224	21.7391	59.0062	2.48447	29.8137	0	11.1801	77.0186	75.7764	5.59006	34.7826	32.2981	8.69565	96.2733
InN ADARB2 CALCR	0	11.8483	30.3318	1.4218	3.31754	2.8436	77.2512	0	0.473934	45.4976	96.6825	20.3791	1.4218	0.947867	49.763	13.2701	1.4218	8.53081	90.5213	0	1.4218	0	93.8389	2.8436	9.47867	4.2654	0	3.79147	4.2654	30.3318	5.21327	3.79147	38.3886	57.8199	0	1.4218	3.31754	36.019	2.36967	11.8483	0	6.16114	61.6114	77.7251	90.9953	1.4218	9.00474	41.2322	98.5782
[truncated: 31 more columns]
